# Supplementary material for: Molecularly stratified hypothalamic astrocytes are cellular foci for obesity
Source: Research Square preprint supplement (doi:10.21203/rs.3.rs-3748581/v1), 2024-02-09
Supplement: Supplementary file 1 [file 0834f5df637a205a1da33110.xlsx]

## Sheet: XGBoost_SVC_Dmodels_perfomances
	model_1	model_2	t_stat	p_val	worse_prob	better_prob	rope_prob
0	200_SelectFromModel(estimator=XGBClassifier(base_score=None, booster=None,
callbacks=None, colsample_bylevel=None,
colsample_bynode=None,
colsample_bytree=None,
early_stopping_rounds=None,
enable_categorical=False,
eval_metric=None, feature_types=None,
gamma=None, gpu_id=None,
grow_policy=None, importance_type=None,
interaction_constraints=None,
learning_rate=0.3, max_bin=None,
max_cat_threshold=None,
max_cat_to_onehot=None,
max_delta_step=None, max_depth=3,
max_leaves=None, min_child_weight=None,
missing=nan, monotone_constraints=None,
n_estimators=100, n_jobs=None,
num_parallel_tree=None, predictor=None,
random_state=None, ...),
max_features=211, threshold=-inf)_0.3_3_100_211"	100_SelectFromModel(estimator=XGBClassifier(base_score=None, booster=None,
callbacks=None, colsample_bylevel=None,
colsample_bynode=None,
colsample_bytree=None,
early_stopping_rounds=None,
enable_categorical=False,
eval_metric=None, feature_types=None,
gamma=None, gpu_id=None,
grow_policy=None, importance_type=None,
interaction_constraints=None,
learning_rate=0.3, max_bin=None,
max_cat_threshold=None,
max_cat_to_onehot=None,
max_delta_step=None, max_depth=3,
max_leaves=None, min_child_weight=None,
missing=nan, monotone_constraints=None,
n_estimators=100, n_jobs=None,
num_parallel_tree=None, predictor=None,
random_state=None, ...),
max_features=211, threshold=-inf)_0.3_3_100_211"	3.776	1.0	0	0.762	0.238
1	200_SelectFromModel(estimator=XGBClassifier(base_score=None, booster=None,
callbacks=None, colsample_bylevel=None,
colsample_bynode=None,
colsample_bytree=None,
early_stopping_rounds=None,
enable_categorical=False,
eval_metric=None, feature_types=None,
gamma=None, gpu_id=None,
grow_policy=None, importance_type=None,
interaction_constraints=None,
learning_rate=0.3, max_bin=None,
max_cat_threshold=None,
max_cat_to_onehot=None,
max_delta_step=None, max_depth=3,
max_leaves=None, min_child_weight=None,
missing=nan, monotone_constraints=None,
n_estimators=100, n_jobs=None,
num_parallel_tree=None, predictor=None,
random_state=None, ...),
max_features=211, threshold=-inf)_0.3_3_100_211"	200_SelectFromModel(estimator=XGBClassifier(base_score=None, booster=None,
callbacks=None, colsample_bylevel=None,
colsample_bynode=None,
colsample_bytree=None,
early_stopping_rounds=None,
enable_categorical=False,
eval_metric=None, feature_types=None,
gamma=None, gpu_id=None,
grow_policy=None, importance_type=None,
interaction_constraints=None,
learning_rate=0.3, max_bin=None,
max_cat_threshold=None,
max_cat_to_onehot=None,
max_delta_step=None, max_depth=3,
max_leaves=None, min_child_weight=None,
missing=nan, monotone_constraints=None,
n_estimators=100, n_jobs=None,
num_parallel_tree=None, predictor=None,
random_state=None, ...),
max_features=211, threshold=-inf)_0.5_3_100_211"	2.549	1.0	0.001	0.835	0.163
2	200_SelectFromModel(estimator=XGBClassifier(base_score=None, booster=None,
callbacks=None, colsample_bylevel=None,
colsample_bynode=None,
colsample_bytree=None,
early_stopping_rounds=None,
enable_categorical=False,
eval_metric=None, feature_types=None,
gamma=None, gpu_id=None,
grow_policy=None, importance_type=None,
interaction_constraints=None,
learning_rate=0.3, max_bin=None,
max_cat_threshold=None,
max_cat_to_onehot=None,
max_delta_step=None, max_depth=3,
max_leaves=None, min_child_weight=None,
missing=nan, monotone_constraints=None,
n_estimators=100, n_jobs=None,
num_parallel_tree=None, predictor=None,
random_state=None, ...),
max_features=211, threshold=-inf)_0.3_3_100_211"	100_SelectFromModel(estimator=XGBClassifier(base_score=None, booster=None,
callbacks=None, colsample_bylevel=None,
colsample_bynode=None,
colsample_bytree=None,
early_stopping_rounds=None,
enable_categorical=False,
eval_metric=None, feature_types=None,
gamma=None, gpu_id=None,
grow_policy=None, importance_type=None,
interaction_constraints=None,
learning_rate=0.3, max_bin=None,
max_cat_threshold=None,
max_cat_to_onehot=None,
max_delta_step=None, max_depth=3,
max_leaves=None, min_child_weight=None,
missing=nan, monotone_constraints=None,
n_estimators=100, n_jobs=None,
num_parallel_tree=None, predictor=None,
random_state=None, ...),
max_features=211, threshold=-inf)_0.5_3_100_211"	5.03	1.0	0	0.992	0.008
3	200_SelectFromModel(estimator=XGBClassifier(base_score=None, booster=None,
callbacks=None, colsample_bylevel=None,
colsample_bynode=None,
colsample_bytree=None,
early_stopping_rounds=None,
enable_categorical=False,
eval_metric=None, feature_types=None,
gamma=None, gpu_id=None,
grow_policy=None, importance_type=None,
interaction_constraints=None,
learning_rate=0.3, max_bin=None,
max_cat_threshold=None,
max_cat_to_onehot=None,
max_delta_step=None, max_depth=3,
max_leaves=None, min_child_weight=None,
missing=nan, monotone_constraints=None,
n_estimators=100, n_jobs=None,
num_parallel_tree=None, predictor=None,
random_state=None, ...),
max_features=211, threshold=-inf)_0.3_3_100_211"	200_SelectFromModel(estimator=XGBClassifier(base_score=None, booster=None,
callbacks=None, colsample_bylevel=None,
colsample_bynode=None,
colsample_bytree=None,
early_stopping_rounds=None,
enable_categorical=False,
eval_metric=None, feature_types=None,
gamma=None, gpu_id=None,
grow_policy=None, importance_type=None,
interaction_constraints=None,
learning_rate=0.3, max_bin=None,
max_cat_threshold=None,
max_cat_to_onehot=None,
max_delta_step=None, max_depth=3,
max_leaves=None, min_child_weight=None,
missing=nan, monotone_constraints=None,
n_estimators=100, n_jobs=None,
num_parallel_tree=None, predictor=None,
random_state=None, ...),
max_features=211, threshold=-inf)_0.1_3_100_422"	1.48	1.0	0.035	0.807	0.158
4	200_SelectFromModel(estimator=XGBClassifier(base_score=None, booster=None,
callbacks=None, colsample_bylevel=None,
colsample_bynode=None,
colsample_bytree=None,
early_stopping_rounds=None,
enable_categorical=False,
eval_metric=None, feature_types=None,
gamma=None, gpu_id=None,
grow_policy=None, importance_type=None,
interaction_constraints=None,
learning_rate=0.3, max_bin=None,
max_cat_threshold=None,
max_cat_to_onehot=None,
max_delta_step=None, max_depth=3,
max_leaves=None, min_child_weight=None,
missing=nan, monotone_constraints=None,
n_estimators=100, n_jobs=None,
num_parallel_tree=None, predictor=None,
random_state=None, ...),
max_features=211, threshold=-inf)_0.3_3_100_211"	200_SelectFromModel(estimator=XGBClassifier(base_score=None, booster=None,
callbacks=None, colsample_bylevel=None,
colsample_bynode=None,
colsample_bytree=None,
early_stopping_rounds=None,
enable_categorical=False,
eval_metric=None, feature_types=None,
gamma=None, gpu_id=None,
grow_policy=None, importance_type=None,
interaction_constraints=None,
learning_rate=0.3, max_bin=None,
max_cat_threshold=None,
max_cat_to_onehot=None,
max_delta_step=None, max_depth=3,
max_leaves=None, min_child_weight=None,
missing=nan, monotone_constraints=None,
n_estimators=100, n_jobs=None,
num_parallel_tree=None, predictor=None,
random_state=None, ...),
max_features=211, threshold=-inf)_0.5_3_250_211"	3.166	1.0	0.001	0.959	0.04
5	200_SelectFromModel(estimator=XGBClassifier(base_score=None, booster=None,
callbacks=None, colsample_bylevel=None,
colsample_bynode=None,
colsample_bytree=None,
early_stopping_rounds=None,
enable_categorical=False,
eval_metric=None, feature_types=None,
gamma=None, gpu_id=None,
grow_policy=None, importance_type=None,
interaction_constraints=None,
learning_rate=0.3, max_bin=None,
max_cat_threshold=None,
max_cat_to_onehot=None,
max_delta_step=None, max_depth=3,
max_leaves=None, min_child_weight=None,
missing=nan, monotone_constraints=None,
n_estimators=100, n_jobs=None,
num_parallel_tree=None, predictor=None,
random_state=None, ...),
max_features=211, threshold=-inf)_0.3_3_100_211"	200_SelectFromModel(estimator=XGBClassifier(base_score=None, booster=None,
callbacks=None, colsample_bylevel=None,
colsample_bynode=None,
colsample_bytree=None,
early_stopping_rounds=None,
enable_categorical=False,
eval_metric=None, feature_types=None,
gamma=None, gpu_id=None,
grow_policy=None, importance_type=None,
interaction_constraints=None,
learning_rate=0.3, max_bin=None,
max_cat_threshold=None,
max_cat_to_onehot=None,
max_delta_step=None, max_depth=3,
max_leaves=None, min_child_weight=None,
missing=nan, monotone_constraints=None,
n_estimators=100, n_jobs=None,
num_parallel_tree=None, predictor=None,
random_state=None, ...),
max_features=211, threshold=-inf)_0.3_3_100_422"	4.395	1.0	0	0.989	0.01
6	200_SelectFromModel(estimator=XGBClassifier(base_score=None, booster=None,
callbacks=None, colsample_bylevel=None,
colsample_bynode=None,
colsample_bytree=None,
early_stopping_rounds=None,
enable_categorical=False,
eval_metric=None, feature_types=None,
gamma=None, gpu_id=None,
grow_policy=None, importance_type=None,
interaction_constraints=None,
learning_rate=0.3, max_bin=None,
max_cat_threshold=None,
max_cat_to_onehot=None,
max_delta_step=None, max_depth=3,
max_leaves=None, min_child_weight=None,
missing=nan, monotone_constraints=None,
n_estimators=100, n_jobs=None,
num_parallel_tree=None, predictor=None,
random_state=None, ...),
max_features=211, threshold=-inf)_0.3_3_100_211"	200_SelectFromModel(estimator=XGBClassifier(base_score=None, booster=None,
callbacks=None, colsample_bylevel=None,
colsample_bynode=None,
colsample_bytree=None,
early_stopping_rounds=None,
enable_categorical=False,
eval_metric=None, feature_types=None,
gamma=None, gpu_id=None,
grow_policy=None, importance_type=None,
interaction_constraints=None,
learning_rate=0.3, max_bin=None,
max_cat_threshold=None,
max_cat_to_onehot=None,
max_delta_step=None, max_depth=3,
max_leaves=None, min_child_weight=None,
missing=nan, monotone_constraints=None,
n_estimators=100, n_jobs=None,
num_parallel_tree=None, predictor=None,
random_state=None, ...),
max_features=211, threshold=-inf)_0.1_3_100_211"	0.959	1.0	0.114	0.726	0.16
7	200_SelectFromModel(estimator=XGBClassifier(base_score=None, booster=None,
callbacks=None, colsample_bylevel=None,
colsample_bynode=None,
colsample_bytree=None,
early_stopping_rounds=None,
enable_categorical=False,
eval_metric=None, feature_types=None,
gamma=None, gpu_id=None,
grow_policy=None, importance_type=None,
interaction_constraints=None,
learning_rate=0.3, max_bin=None,
max_cat_threshold=None,
max_cat_to_onehot=None,
max_delta_step=None, max_depth=3,
max_leaves=None, min_child_weight=None,
missing=nan, monotone_constraints=None,
n_estimators=100, n_jobs=None,
num_parallel_tree=None, predictor=None,
random_state=None, ...),
max_features=211, threshold=-inf)_0.3_3_100_211"	200_SelectFromModel(estimator=XGBClassifier(base_score=None, booster=None,
callbacks=None, colsample_bylevel=None,
colsample_bynode=None,
colsample_bytree=None,
early_stopping_rounds=None,
enable_categorical=False,
eval_metric=None, feature_types=None,
gamma=None, gpu_id=None,
grow_policy=None, importance_type=None,
interaction_constraints=None,
learning_rate=0.3, max_bin=None,
max_cat_threshold=None,
max_cat_to_onehot=None,
max_delta_step=None, max_depth=3,
max_leaves=None, min_child_weight=None,
missing=nan, monotone_constraints=None,
n_estimators=100, n_jobs=None,
num_parallel_tree=None, predictor=None,
random_state=None, ...),
max_features=211, threshold=-inf)_0.3_3_250_211"	9.184	0.526	0	1	0
8	200_SelectFromModel(estimator=XGBClassifier(base_score=None, booster=None,
callbacks=None, colsample_bylevel=None,
colsample_bynode=None,
colsample_bytree=None,
early_stopping_rounds=None,
enable_categorical=False,
eval_metric=None, feature_types=None,
gamma=None, gpu_id=None,
grow_policy=None, importance_type=None,
interaction_constraints=None,
learning_rate=0.3, max_bin=None,
max_cat_threshold=None,
max_cat_to_onehot=None,
max_delta_step=None, max_depth=3,
max_leaves=None, min_child_weight=None,
missing=nan, monotone_constraints=None,
n_estimators=100, n_jobs=None,
num_parallel_tree=None, predictor=None,
random_state=None, ...),
max_features=211, threshold=-inf)_0.3_3_100_211"	100_SelectFromModel(estimator=XGBClassifier(base_score=None, booster=None,
callbacks=None, colsample_bylevel=None,
colsample_bynode=None,
colsample_bytree=None,
early_stopping_rounds=None,
enable_categorical=False,
eval_metric=None, feature_types=None,
gamma=None, gpu_id=None,
grow_policy=None, importance_type=None,
interaction_constraints=None,
learning_rate=0.3, max_bin=None,
max_cat_threshold=None,
max_cat_to_onehot=None,
max_delta_step=None, max_depth=3,
max_leaves=None, min_child_weight=None,
missing=nan, monotone_constraints=None,
n_estimators=100, n_jobs=None,
num_parallel_tree=None, predictor=None,
random_state=None, ...),
max_features=211, threshold=-inf)_0.3_3_100_422"	5.011	1.0	0	0.997	0.003
9	200_SelectFromModel(estimator=XGBClassifier(base_score=None, booster=None,
callbacks=None, colsample_bylevel=None,
colsample_bynode=None,
colsample_bytree=None,
early_stopping_rounds=None,
enable_categorical=False,
eval_metric=None, feature_types=None,
gamma=None, gpu_id=None,
grow_policy=None, importance_type=None,
interaction_constraints=None,
learning_rate=0.3, max_bin=None,
max_cat_threshold=None,
max_cat_to_onehot=None,
max_delta_step=None, max_depth=3,
max_leaves=None, min_child_weight=None,
missing=nan, monotone_constraints=None,
n_estimators=100, n_jobs=None,
num_parallel_tree=None, predictor=None,
random_state=None, ...),
max_features=211, threshold=-inf)_0.3_3_100_211"	200_SelectFromModel(estimator=XGBClassifier(base_score=None, booster=None,
callbacks=None, colsample_bylevel=None,
colsample_bynode=None,
colsample_bytree=None,
early_stopping_rounds=None,
enable_categorical=False,
eval_metric=None, feature_types=None,
gamma=None, gpu_id=None,
grow_policy=None, importance_type=None,
interaction_constraints=None,
learning_rate=0.3, max_bin=None,
max_cat_threshold=None,
max_cat_to_onehot=None,
max_delta_step=None, max_depth=3,
max_leaves=None, min_child_weight=None,
missing=nan, monotone_constraints=None,
n_estimators=100, n_jobs=None,
num_parallel_tree=None, predictor=None,
random_state=None, ...),
max_features=211, threshold=-inf)_0.5_3_500_211"	4.127	1.0	0	0.992	0.007
10	200_SelectFromModel(estimator=XGBClassifier(base_score=None, booster=None,
callbacks=None, colsample_bylevel=None,
colsample_bynode=None,
colsample_bytree=None,
early_stopping_rounds=None,
enable_categorical=False,
eval_metric=None, feature_types=None,
gamma=None, gpu_id=None,
grow_policy=None, importance_type=None,
interaction_constraints=None,
learning_rate=0.3, max_bin=None,
max_cat_threshold=None,
max_cat_to_onehot=None,
max_delta_step=None, max_depth=3,
max_leaves=None, min_child_weight=None,
missing=nan, monotone_constraints=None,
n_estimators=100, n_jobs=None,
num_parallel_tree=None, predictor=None,
random_state=None, ...),
max_features=211, threshold=-inf)_0.3_3_100_211"	100_SelectFromModel(estimator=XGBClassifier(base_score=None, booster=None,
callbacks=None, colsample_bylevel=None,
colsample_bynode=None,
colsample_bytree=None,
early_stopping_rounds=None,
enable_categorical=False,
eval_metric=None, feature_types=None,
gamma=None, gpu_id=None,
grow_policy=None, importance_type=None,
interaction_constraints=None,
learning_rate=0.3, max_bin=None,
max_cat_threshold=None,
max_cat_to_onehot=None,
max_delta_step=None, max_depth=3,
max_leaves=None, min_child_weight=None,
missing=nan, monotone_constraints=None,
n_estimators=100, n_jobs=None,
num_parallel_tree=None, predictor=None,
random_state=None, ...),
max_features=211, threshold=-inf)_0.5_3_250_211"	5.324	1.0	0	0.998	0.002
11	200_SelectFromModel(estimator=XGBClassifier(base_score=None, booster=None,
callbacks=None, colsample_bylevel=None,
colsample_bynode=None,
colsample_bytree=None,
early_stopping_rounds=None,
enable_categorical=False,
eval_metric=None, feature_types=None,
gamma=None, gpu_id=None,
grow_policy=None, importance_type=None,
interaction_constraints=None,
learning_rate=0.3, max_bin=None,
max_cat_threshold=None,
max_cat_to_onehot=None,
max_delta_step=None, max_depth=3,
max_leaves=None, min_child_weight=None,
missing=nan, monotone_constraints=None,
n_estimators=100, n_jobs=None,
num_parallel_tree=None, predictor=None,
random_state=None, ...),
max_features=211, threshold=-inf)_0.3_3_100_211"	200_SelectFromModel(estimator=XGBClassifier(base_score=None, booster=None,
callbacks=None, colsample_bylevel=None,
colsample_bynode=None,
colsample_bytree=None,
early_stopping_rounds=None,
enable_categorical=False,
eval_metric=None, feature_types=None,
gamma=None, gpu_id=None,
grow_policy=None, importance_type=None,
interaction_constraints=None,
learning_rate=0.3, max_bin=None,
max_cat_threshold=None,
max_cat_to_onehot=None,
max_delta_step=None, max_depth=3,
max_leaves=None, min_child_weight=None,
missing=nan, monotone_constraints=None,
n_estimators=100, n_jobs=None,
num_parallel_tree=None, predictor=None,
random_state=None, ...),
max_features=211, threshold=-inf)_0.5_3_100_422"	6.907	1.0	0	1	0
12	200_SelectFromModel(estimator=XGBClassifier(base_score=None, booster=None,
callbacks=None, colsample_bylevel=None,
colsample_bynode=None,
colsample_bytree=None,
early_stopping_rounds=None,
enable_categorical=False,
eval_metric=None, feature_types=None,
gamma=None, gpu_id=None,
grow_policy=None, importance_type=None,
interaction_constraints=None,
learning_rate=0.3, max_bin=None,
max_cat_threshold=None,
max_cat_to_onehot=None,
max_delta_step=None, max_depth=3,
max_leaves=None, min_child_weight=None,
missing=nan, monotone_constraints=None,
n_estimators=100, n_jobs=None,
num_parallel_tree=None, predictor=None,
random_state=None, ...),
max_features=211, threshold=-inf)_0.3_3_100_211"	200_SelectFromModel(estimator=XGBClassifier(base_score=None, booster=None,
callbacks=None, colsample_bylevel=None,
colsample_bynode=None,
colsample_bytree=None,
early_stopping_rounds=None,
enable_categorical=False,
eval_metric=None, feature_types=None,
gamma=None, gpu_id=None,
grow_policy=None, importance_type=None,
interaction_constraints=None,
learning_rate=0.3, max_bin=None,
max_cat_threshold=None,
max_cat_to_onehot=None,
max_delta_step=None, max_depth=3,
max_leaves=None, min_child_weight=None,
missing=nan, monotone_constraints=None,
n_estimators=100, n_jobs=None,
num_parallel_tree=None, predictor=None,
random_state=None, ...),
max_features=211, threshold=-inf)_0.3_3_500_211"	8.829	0.727	0	1	0
13	200_SelectFromModel(estimator=XGBClassifier(base_score=None, booster=None,
callbacks=None, colsample_bylevel=None,
colsample_bynode=None,
colsample_bytree=None,
early_stopping_rounds=None,
enable_categorical=False,
eval_metric=None, feature_types=None,
gamma=None, gpu_id=None,
grow_policy=None, importance_type=None,
interaction_constraints=None,
learning_rate=0.3, max_bin=None,
max_cat_threshold=None,
max_cat_to_onehot=None,
max_delta_step=None, max_depth=3,
max_leaves=None, min_child_weight=None,
missing=nan, monotone_constraints=None,
n_estimators=100, n_jobs=None,
num_parallel_tree=None, predictor=None,
random_state=None, ...),
max_features=211, threshold=-inf)_0.3_3_100_211"	200_SelectFromModel(estimator=XGBClassifier(base_score=None, booster=None,
callbacks=None, colsample_bylevel=None,
colsample_bynode=None,
colsample_bytree=None,
early_stopping_rounds=None,
enable_categorical=False,
eval_metric=None, feature_types=None,
gamma=None, gpu_id=None,
grow_policy=None, importance_type=None,
interaction_constraints=None,
learning_rate=0.3, max_bin=None,
max_cat_threshold=None,
max_cat_to_onehot=None,
max_delta_step=None, max_depth=3,
max_leaves=None, min_child_weight=None,
missing=nan, monotone_constraints=None,
n_estimators=100, n_jobs=None,
num_parallel_tree=None, predictor=None,
random_state=None, ...),
max_features=211, threshold=-inf)_0.5_3_250_422"	5.936	1.0	0	0.999	0.001
14	200_SelectFromModel(estimator=XGBClassifier(base_score=None, booster=None,
callbacks=None, colsample_bylevel=None,
colsample_bynode=None,
colsample_bytree=None,
early_stopping_rounds=None,
enable_categorical=False,
eval_metric=None, feature_types=None,
gamma=None, gpu_id=None,
grow_policy=None, importance_type=None,
interaction_constraints=None,
learning_rate=0.3, max_bin=None,
max_cat_threshold=None,
max_cat_to_onehot=None,
max_delta_step=None, max_depth=3,
max_leaves=None, min_child_weight=None,
missing=nan, monotone_constraints=None,
n_estimators=100, n_jobs=None,
num_parallel_tree=None, predictor=None,
random_state=None, ...),
max_features=211, threshold=-inf)_0.3_3_100_211"	100_SelectFromModel(estimator=XGBClassifier(base_score=None, booster=None,
callbacks=None, colsample_bylevel=None,
colsample_bynode=None,
colsample_bytree=None,
early_stopping_rounds=None,
enable_categorical=False,
eval_metric=None, feature_types=None,
gamma=None, gpu_id=None,
grow_policy=None, importance_type=None,
interaction_constraints=None,
learning_rate=0.3, max_bin=None,
max_cat_threshold=None,
max_cat_to_onehot=None,
max_delta_step=None, max_depth=3,
max_leaves=None, min_child_weight=None,
missing=nan, monotone_constraints=None,
n_estimators=100, n_jobs=None,
num_parallel_tree=None, predictor=None,
random_state=None, ...),
max_features=211, threshold=-inf)_0.5_3_100_422"	7.599	1.0	0	1	0
15	200_SelectFromModel(estimator=XGBClassifier(base_score=None, booster=None,
callbacks=None, colsample_bylevel=None,
colsample_bynode=None,
colsample_bytree=None,
early_stopping_rounds=None,
enable_categorical=False,
eval_metric=None, feature_types=None,
gamma=None, gpu_id=None,
grow_policy=None, importance_type=None,
interaction_constraints=None,
learning_rate=0.3, max_bin=None,
max_cat_threshold=None,
max_cat_to_onehot=None,
max_delta_step=None, max_depth=3,
max_leaves=None, min_child_weight=None,
missing=nan, monotone_constraints=None,
n_estimators=100, n_jobs=None,
num_parallel_tree=None, predictor=None,
random_state=None, ...),
max_features=211, threshold=-inf)_0.3_3_100_211"	200_SelectFromModel(estimator=XGBClassifier(base_score=None, booster=None,
callbacks=None, colsample_bylevel=None,
colsample_bynode=None,
colsample_bytree=None,
early_stopping_rounds=None,
enable_categorical=False,
eval_metric=None, feature_types=None,
gamma=None, gpu_id=None,
grow_policy=None, importance_type=None,
interaction_constraints=None,
learning_rate=0.3, max_bin=None,
max_cat_threshold=None,
max_cat_to_onehot=None,
max_delta_step=None, max_depth=3,
max_leaves=None, min_child_weight=None,
missing=nan, monotone_constraints=None,
n_estimators=100, n_jobs=None,
num_parallel_tree=None, predictor=None,
random_state=None, ...),
max_features=211, threshold=-inf)_0.1_3_250_211"	1.539	1.0	0.044	0.864	0.092
16	200_SelectFromModel(estimator=XGBClassifier(base_score=None, booster=None,
callbacks=None, colsample_bylevel=None,
colsample_bynode=None,
colsample_bytree=None,
early_stopping_rounds=None,
enable_categorical=False,
eval_metric=None, feature_types=None,
gamma=None, gpu_id=None,
grow_policy=None, importance_type=None,
interaction_constraints=None,
learning_rate=0.3, max_bin=None,
max_cat_threshold=None,
max_cat_to_onehot=None,
max_delta_step=None, max_depth=3,
max_leaves=None, min_child_weight=None,
missing=nan, monotone_constraints=None,
n_estimators=100, n_jobs=None,
num_parallel_tree=None, predictor=None,
random_state=None, ...),
max_features=211, threshold=-inf)_0.3_3_100_211"	100_SelectFromModel(estimator=XGBClassifier(base_score=None, booster=None,
callbacks=None, colsample_bylevel=None,
colsample_bynode=None,
colsample_bytree=None,
early_stopping_rounds=None,
enable_categorical=False,
eval_metric=None, feature_types=None,
gamma=None, gpu_id=None,
grow_policy=None, importance_type=None,
interaction_constraints=None,
learning_rate=0.3, max_bin=None,
max_cat_threshold=None,
max_cat_to_onehot=None,
max_delta_step=None, max_depth=3,
max_leaves=None, min_child_weight=None,
missing=nan, monotone_constraints=None,
n_estimators=100, n_jobs=None,
num_parallel_tree=None, predictor=None,
random_state=None, ...),
max_features=211, threshold=-inf)_0.1_3_100_422"	1.828	1.0	0.026	0.904	0.071
17	200_SelectFromModel(estimator=XGBClassifier(base_score=None, booster=None,
callbacks=None, colsample_bylevel=None,
colsample_bynode=None,
colsample_bytree=None,
early_stopping_rounds=None,
enable_categorical=False,
eval_metric=None, feature_types=None,
gamma=None, gpu_id=None,
grow_policy=None, importance_type=None,
interaction_constraints=None,
learning_rate=0.3, max_bin=None,
max_cat_threshold=None,
max_cat_to_onehot=None,
max_delta_step=None, max_depth=3,
max_leaves=None, min_child_weight=None,
missing=nan, monotone_constraints=None,
n_estimators=100, n_jobs=None,
num_parallel_tree=None, predictor=None,
random_state=None, ...),
max_features=211, threshold=-inf)_0.3_3_100_211"	100_SelectFromModel(estimator=XGBClassifier(base_score=None, booster=None,
callbacks=None, colsample_bylevel=None,
colsample_bynode=None,
colsample_bytree=None,
early_stopping_rounds=None,
enable_categorical=False,
eval_metric=None, feature_types=None,
gamma=None, gpu_id=None,
grow_policy=None, importance_type=None,
interaction_constraints=None,
learning_rate=0.3, max_bin=None,
max_cat_threshold=None,
max_cat_to_onehot=None,
max_delta_step=None, max_depth=3,
max_leaves=None, min_child_weight=None,
missing=nan, monotone_constraints=None,
n_estimators=100, n_jobs=None,
num_parallel_tree=None, predictor=None,
random_state=None, ...),
max_features=211, threshold=-inf)_0.3_3_250_211"	7.378	1.0	0	1	0
18	200_SelectFromModel(estimator=XGBClassifier(base_score=None, booster=None,
callbacks=None, colsample_bylevel=None,
colsample_bynode=None,
colsample_bytree=None,
early_stopping_rounds=None,
enable_categorical=False,
eval_metric=None, feature_types=None,
gamma=None, gpu_id=None,
grow_policy=None, importance_type=None,
interaction_constraints=None,
learning_rate=0.3, max_bin=None,
max_cat_threshold=None,
max_cat_to_onehot=None,
max_delta_step=None, max_depth=3,
max_leaves=None, min_child_weight=None,
missing=nan, monotone_constraints=None,
n_estimators=100, n_jobs=None,
num_parallel_tree=None, predictor=None,
random_state=None, ...),
max_features=211, threshold=-inf)_0.3_3_100_211"	200_SelectFromModel(estimator=XGBClassifier(base_score=None, booster=None,
callbacks=None, colsample_bylevel=None,
colsample_bynode=None,
colsample_bytree=None,
early_stopping_rounds=None,
enable_categorical=False,
eval_metric=None, feature_types=None,
gamma=None, gpu_id=None,
grow_policy=None, importance_type=None,
interaction_constraints=None,
learning_rate=0.3, max_bin=None,
max_cat_threshold=None,
max_cat_to_onehot=None,
max_delta_step=None, max_depth=3,
max_leaves=None, min_child_weight=None,
missing=nan, monotone_constraints=None,
n_estimators=100, n_jobs=None,
num_parallel_tree=None, predictor=None,
random_state=None, ...),
max_features=211, threshold=-inf)_0.1_3_100_527"	2.982	1.0	0.003	0.977	0.02
19	200_SelectFromModel(estimator=XGBClassifier(base_score=None, booster=None,
callbacks=None, colsample_bylevel=None,
colsample_bynode=None,
colsample_bytree=None,
early_stopping_rounds=None,
enable_categorical=False,
eval_metric=None, feature_types=None,
gamma=None, gpu_id=None,
grow_policy=None, importance_type=None,
interaction_constraints=None,
learning_rate=0.3, max_bin=None,
max_cat_threshold=None,
max_cat_to_onehot=None,
max_delta_step=None, max_depth=3,
max_leaves=None, min_child_weight=None,
missing=nan, monotone_constraints=None,
n_estimators=100, n_jobs=None,
num_parallel_tree=None, predictor=None,
random_state=None, ...),
max_features=211, threshold=-inf)_0.3_3_100_211"	100_SelectFromModel(estimator=XGBClassifier(base_score=None, booster=None,
callbacks=None, colsample_bylevel=None,
colsample_bynode=None,
colsample_bytree=None,
early_stopping_rounds=None,
enable_categorical=False,
eval_metric=None, feature_types=None,
gamma=None, gpu_id=None,
grow_policy=None, importance_type=None,
interaction_constraints=None,
learning_rate=0.3, max_bin=None,
max_cat_threshold=None,
max_cat_to_onehot=None,
max_delta_step=None, max_depth=3,
max_leaves=None, min_child_weight=None,
missing=nan, monotone_constraints=None,
n_estimators=100, n_jobs=None,
num_parallel_tree=None, predictor=None,
random_state=None, ...),
max_features=211, threshold=-inf)_0.5_3_500_211"	6.618	1.0	0	1	0
20	200_SelectFromModel(estimator=XGBClassifier(base_score=None, booster=None,
callbacks=None, colsample_bylevel=None,
colsample_bynode=None,
colsample_bytree=None,
early_stopping_rounds=None,
enable_categorical=False,
eval_metric=None, feature_types=None,
gamma=None, gpu_id=None,
grow_policy=None, importance_type=None,
interaction_constraints=None,
learning_rate=0.3, max_bin=None,
max_cat_threshold=None,
max_cat_to_onehot=None,
max_delta_step=None, max_depth=3,
max_leaves=None, min_child_weight=None,
missing=nan, monotone_constraints=None,
n_estimators=100, n_jobs=None,
num_parallel_tree=None, predictor=None,
random_state=None, ...),
max_features=211, threshold=-inf)_0.3_3_100_211"	200_SelectFromModel(estimator=XGBClassifier(base_score=None, booster=None,
callbacks=None, colsample_bylevel=None,
colsample_bynode=None,
colsample_bytree=None,
early_stopping_rounds=None,
enable_categorical=False,
eval_metric=None, feature_types=None,
gamma=None, gpu_id=None,
grow_policy=None, importance_type=None,
interaction_constraints=None,
learning_rate=0.3, max_bin=None,
max_cat_threshold=None,
max_cat_to_onehot=None,
max_delta_step=None, max_depth=3,
max_leaves=None, min_child_weight=None,
missing=nan, monotone_constraints=None,
n_estimators=100, n_jobs=None,
num_parallel_tree=None, predictor=None,
random_state=None, ...),
max_features=211, threshold=-inf)_0.3_3_100_527"	5.388	1.0	0	0.999	0.001
21	200_SelectFromModel(estimator=XGBClassifier(base_score=None, booster=None,
callbacks=None, colsample_bylevel=None,
colsample_bynode=None,
colsample_bytree=None,
early_stopping_rounds=None,
enable_categorical=False,
eval_metric=None, feature_types=None,
gamma=None, gpu_id=None,
grow_policy=None, importance_type=None,
interaction_constraints=None,
learning_rate=0.3, max_bin=None,
max_cat_threshold=None,
max_cat_to_onehot=None,
max_delta_step=None, max_depth=3,
max_leaves=None, min_child_weight=None,
missing=nan, monotone_constraints=None,
n_estimators=100, n_jobs=None,
num_parallel_tree=None, predictor=None,
random_state=None, ...),
max_features=211, threshold=-inf)_0.3_3_100_211"	200_SelectFromModel(estimator=XGBClassifier(base_score=None, booster=None,
callbacks=None, colsample_bylevel=None,
colsample_bynode=None,
colsample_bytree=None,
early_stopping_rounds=None,
enable_categorical=False,
eval_metric=None, feature_types=None,
gamma=None, gpu_id=None,
grow_policy=None, importance_type=None,
interaction_constraints=None,
learning_rate=0.3, max_bin=None,
max_cat_threshold=None,
max_cat_to_onehot=None,
max_delta_step=None, max_depth=3,
max_leaves=None, min_child_weight=None,
missing=nan, monotone_constraints=None,
n_estimators=100, n_jobs=None,
num_parallel_tree=None, predictor=None,
random_state=None, ...),
max_features=211, threshold=-inf)_0.5_3_100_527"	6.757	1.0	0	1	0
22	200_SelectFromModel(estimator=XGBClassifier(base_score=None, booster=None,
callbacks=None, colsample_bylevel=None,
colsample_bynode=None,
colsample_bytree=None,
early_stopping_rounds=None,
enable_categorical=False,
eval_metric=None, feature_types=None,
gamma=None, gpu_id=None,
grow_policy=None, importance_type=None,
interaction_constraints=None,
learning_rate=0.3, max_bin=None,
max_cat_threshold=None,
max_cat_to_onehot=None,
max_delta_step=None, max_depth=3,
max_leaves=None, min_child_weight=None,
missing=nan, monotone_constraints=None,
n_estimators=100, n_jobs=None,
num_parallel_tree=None, predictor=None,
random_state=None, ...),
max_features=211, threshold=-inf)_0.3_3_100_211"	100_SelectFromModel(estimator=XGBClassifier(base_score=None, booster=None,
callbacks=None, colsample_bylevel=None,
colsample_bynode=None,
colsample_bytree=None,
early_stopping_rounds=None,
enable_categorical=False,
eval_metric=None, feature_types=None,
gamma=None, gpu_id=None,
grow_policy=None, importance_type=None,
interaction_constraints=None,
learning_rate=0.3, max_bin=None,
max_cat_threshold=None,
max_cat_to_onehot=None,
max_delta_step=None, max_depth=3,
max_leaves=None, min_child_weight=None,
missing=nan, monotone_constraints=None,
n_estimators=100, n_jobs=None,
num_parallel_tree=None, predictor=None,
random_state=None, ...),
max_features=211, threshold=-inf)_0.1_3_100_211"	1.309	1.0	0.074	0.837	0.088
23	200_SelectFromModel(estimator=XGBClassifier(base_score=None, booster=None,
callbacks=None, colsample_bylevel=None,
colsample_bynode=None,
colsample_bytree=None,
early_stopping_rounds=None,
enable_categorical=False,
eval_metric=None, feature_types=None,
gamma=None, gpu_id=None,
grow_policy=None, importance_type=None,
interaction_constraints=None,
learning_rate=0.3, max_bin=None,
max_cat_threshold=None,
max_cat_to_onehot=None,
max_delta_step=None, max_depth=3,
max_leaves=None, min_child_weight=None,
missing=nan, monotone_constraints=None,
n_estimators=100, n_jobs=None,
num_parallel_tree=None, predictor=None,
random_state=None, ...),
max_features=211, threshold=-inf)_0.3_3_100_211"	200_SelectFromModel(estimator=XGBClassifier(base_score=None, booster=None,
callbacks=None, colsample_bylevel=None,
colsample_bynode=None,
colsample_bytree=None,
early_stopping_rounds=None,
enable_categorical=False,
eval_metric=None, feature_types=None,
gamma=None, gpu_id=None,
grow_policy=None, importance_type=None,
interaction_constraints=None,
learning_rate=0.3, max_bin=None,
max_cat_threshold=None,
max_cat_to_onehot=None,
max_delta_step=None, max_depth=3,
max_leaves=None, min_child_weight=None,
missing=nan, monotone_constraints=None,
n_estimators=100, n_jobs=None,
num_parallel_tree=None, predictor=None,
random_state=None, ...),
max_features=211, threshold=-inf)_0.5_3_500_422"	7.808	1.0	0	1	0
24	200_SelectFromModel(estimator=XGBClassifier(base_score=None, booster=None,
callbacks=None, colsample_bylevel=None,
colsample_bynode=None,
colsample_bytree=None,
early_stopping_rounds=None,
enable_categorical=False,
eval_metric=None, feature_types=None,
gamma=None, gpu_id=None,
grow_policy=None, importance_type=None,
interaction_constraints=None,
learning_rate=0.3, max_bin=None,
max_cat_threshold=None,
max_cat_to_onehot=None,
max_delta_step=None, max_depth=3,
max_leaves=None, min_child_weight=None,
missing=nan, monotone_constraints=None,
n_estimators=100, n_jobs=None,
num_parallel_tree=None, predictor=None,
random_state=None, ...),
max_features=211, threshold=-inf)_0.3_3_100_211"	100_SelectFromModel(estimator=XGBClassifier(base_score=None, booster=None,
callbacks=None, colsample_bylevel=None,
colsample_bynode=None,
colsample_bytree=None,
early_stopping_rounds=None,
enable_categorical=False,
eval_metric=None, feature_types=None,
gamma=None, gpu_id=None,
grow_policy=None, importance_type=None,
interaction_constraints=None,
learning_rate=0.3, max_bin=None,
max_cat_threshold=None,
max_cat_to_onehot=None,
max_delta_step=None, max_depth=3,
max_leaves=None, min_child_weight=None,
missing=nan, monotone_constraints=None,
n_estimators=100, n_jobs=None,
num_parallel_tree=None, predictor=None,
random_state=None, ...),
max_features=211, threshold=-inf)_0.5_3_250_422"	10.381	0.191	0	1	0
25	200_SelectFromModel(estimator=XGBClassifier(base_score=None, booster=None,
callbacks=None, colsample_bylevel=None,
colsample_bynode=None,
colsample_bytree=None,
early_stopping_rounds=None,
enable_categorical=False,
eval_metric=None, feature_types=None,
gamma=None, gpu_id=None,
grow_policy=None, importance_type=None,
interaction_constraints=None,
learning_rate=0.3, max_bin=None,
max_cat_threshold=None,
max_cat_to_onehot=None,
max_delta_step=None, max_depth=3,
max_leaves=None, min_child_weight=None,
missing=nan, monotone_constraints=None,
n_estimators=100, n_jobs=None,
num_parallel_tree=None, predictor=None,
random_state=None, ...),
max_features=211, threshold=-inf)_0.3_3_100_211"	100_SelectFromModel(estimator=XGBClassifier(base_score=None, booster=None,
callbacks=None, colsample_bylevel=None,
colsample_bynode=None,
colsample_bytree=None,
early_stopping_rounds=None,
enable_categorical=False,
eval_metric=None, feature_types=None,
gamma=None, gpu_id=None,
grow_policy=None, importance_type=None,
interaction_constraints=None,
learning_rate=0.3, max_bin=None,
max_cat_threshold=None,
max_cat_to_onehot=None,
max_delta_step=None, max_depth=3,
max_leaves=None, min_child_weight=None,
missing=nan, monotone_constraints=None,
n_estimators=100, n_jobs=None,
num_parallel_tree=None, predictor=None,
random_state=None, ...),
max_features=211, threshold=-inf)_0.3_3_100_527"	4.946	1.0	0	0.998	0.002
26	200_SelectFromModel(estimator=XGBClassifier(base_score=None, booster=None,
callbacks=None, colsample_bylevel=None,
colsample_bynode=None,
colsample_bytree=None,
early_stopping_rounds=None,
enable_categorical=False,
eval_metric=None, feature_types=None,
gamma=None, gpu_id=None,
grow_policy=None, importance_type=None,
interaction_constraints=None,
learning_rate=0.3, max_bin=None,
max_cat_threshold=None,
max_cat_to_onehot=None,
max_delta_step=None, max_depth=3,
max_leaves=None, min_child_weight=None,
missing=nan, monotone_constraints=None,
n_estimators=100, n_jobs=None,
num_parallel_tree=None, predictor=None,
random_state=None, ...),
max_features=211, threshold=-inf)_0.3_3_100_211"	100_SelectFromModel(estimator=XGBClassifier(base_score=None, booster=None,
callbacks=None, colsample_bylevel=None,
colsample_bynode=None,
colsample_bytree=None,
early_stopping_rounds=None,
enable_categorical=False,
eval_metric=None, feature_types=None,
gamma=None, gpu_id=None,
grow_policy=None, importance_type=None,
interaction_constraints=None,
learning_rate=0.3, max_bin=None,
max_cat_threshold=None,
max_cat_to_onehot=None,
max_delta_step=None, max_depth=3,
max_leaves=None, min_child_weight=None,
missing=nan, monotone_constraints=None,
n_estimators=100, n_jobs=None,
num_parallel_tree=None, predictor=None,
random_state=None, ...),
max_features=211, threshold=-inf)_0.5_3_100_527"	8.395	1.0	0	1	0
27	200_SelectFromModel(estimator=XGBClassifier(base_score=None, booster=None,
callbacks=None, colsample_bylevel=None,
colsample_bynode=None,
colsample_bytree=None,
early_stopping_rounds=None,
enable_categorical=False,
eval_metric=None, feature_types=None,
gamma=None, gpu_id=None,
grow_policy=None, importance_type=None,
interaction_constraints=None,
learning_rate=0.3, max_bin=None,
max_cat_threshold=None,
max_cat_to_onehot=None,
max_delta_step=None, max_depth=3,
max_leaves=None, min_child_weight=None,
missing=nan, monotone_constraints=None,
n_estimators=100, n_jobs=None,
num_parallel_tree=None, predictor=None,
random_state=None, ...),
max_features=211, threshold=-inf)_0.3_3_100_211"	200_SelectFromModel(estimator=XGBClassifier(base_score=None, booster=None,
callbacks=None, colsample_bylevel=None,
colsample_bynode=None,
colsample_bytree=None,
early_stopping_rounds=None,
enable_categorical=False,
eval_metric=None, feature_types=None,
gamma=None, gpu_id=None,
grow_policy=None, importance_type=None,
interaction_constraints=None,
learning_rate=0.3, max_bin=None,
max_cat_threshold=None,
max_cat_to_onehot=None,
max_delta_step=None, max_depth=3,
max_leaves=None, min_child_weight=None,
missing=nan, monotone_constraints=None,
n_estimators=100, n_jobs=None,
num_parallel_tree=None, predictor=None,
random_state=None, ...),
max_features=211, threshold=-inf)_0.5_5_100_211"	4.863	1.0	0	0.998	0.002
28	200_SelectFromModel(estimator=XGBClassifier(base_score=None, booster=None,
callbacks=None, colsample_bylevel=None,
colsample_bynode=None,
colsample_bytree=None,
early_stopping_rounds=None,
enable_categorical=False,
eval_metric=None, feature_types=None,
gamma=None, gpu_id=None,
grow_policy=None, importance_type=None,
interaction_constraints=None,
learning_rate=0.3, max_bin=None,
max_cat_threshold=None,
max_cat_to_onehot=None,
max_delta_step=None, max_depth=3,
max_leaves=None, min_child_weight=None,
missing=nan, monotone_constraints=None,
n_estimators=100, n_jobs=None,
num_parallel_tree=None, predictor=None,
random_state=None, ...),
max_features=211, threshold=-inf)_0.3_3_100_211"	100_SelectFromModel(estimator=XGBClassifier(base_score=None, booster=None,
callbacks=None, colsample_bylevel=None,
colsample_bynode=None,
colsample_bytree=None,
early_stopping_rounds=None,
enable_categorical=False,
eval_metric=None, feature_types=None,
gamma=None, gpu_id=None,
grow_policy=None, importance_type=None,
interaction_constraints=None,
learning_rate=0.3, max_bin=None,
max_cat_threshold=None,
max_cat_to_onehot=None,
max_delta_step=None, max_depth=3,
max_leaves=None, min_child_weight=None,
missing=nan, monotone_constraints=None,
n_estimators=100, n_jobs=None,
num_parallel_tree=None, predictor=None,
random_state=None, ...),
max_features=211, threshold=-inf)_0.1_3_100_527"	2.677	1.0	0.006	0.971	0.024
29	200_SelectFromModel(estimator=XGBClassifier(base_score=None, booster=None,
callbacks=None, colsample_bylevel=None,
colsample_bynode=None,
colsample_bytree=None,
early_stopping_rounds=None,
enable_categorical=False,
eval_metric=None, feature_types=None,
gamma=None, gpu_id=None,
grow_policy=None, importance_type=None,
interaction_constraints=None,
learning_rate=0.3, max_bin=None,
max_cat_threshold=None,
max_cat_to_onehot=None,
max_delta_step=None, max_depth=3,
max_leaves=None, min_child_weight=None,
missing=nan, monotone_constraints=None,
n_estimators=100, n_jobs=None,
num_parallel_tree=None, predictor=None,
random_state=None, ...),
max_features=211, threshold=-inf)_0.3_3_100_211"	100_SelectFromModel(estimator=XGBClassifier(base_score=None, booster=None,
callbacks=None, colsample_bylevel=None,
colsample_bynode=None,
colsample_bytree=None,
early_stopping_rounds=None,
enable_categorical=False,
eval_metric=None, feature_types=None,
gamma=None, gpu_id=None,
grow_policy=None, importance_type=None,
interaction_constraints=None,
learning_rate=0.3, max_bin=None,
max_cat_threshold=None,
max_cat_to_onehot=None,
max_delta_step=None, max_depth=3,
max_leaves=None, min_child_weight=None,
missing=nan, monotone_constraints=None,
n_estimators=100, n_jobs=None,
num_parallel_tree=None, predictor=None,
random_state=None, ...),
max_features=211, threshold=-inf)_0.3_3_500_211"	7.467	1.0	0	1	0
30	200_SelectFromModel(estimator=XGBClassifier(base_score=None, booster=None,
callbacks=None, colsample_bylevel=None,
colsample_bynode=None,
colsample_bytree=None,
early_stopping_rounds=None,
enable_categorical=False,
eval_metric=None, feature_types=None,
gamma=None, gpu_id=None,
grow_policy=None, importance_type=None,
interaction_constraints=None,
learning_rate=0.3, max_bin=None,
max_cat_threshold=None,
max_cat_to_onehot=None,
max_delta_step=None, max_depth=3,
max_leaves=None, min_child_weight=None,
missing=nan, monotone_constraints=None,
n_estimators=100, n_jobs=None,
num_parallel_tree=None, predictor=None,
random_state=None, ...),
max_features=211, threshold=-inf)_0.3_3_100_211"	200_SelectFromModel(estimator=XGBClassifier(base_score=None, booster=None,
callbacks=None, colsample_bylevel=None,
colsample_bynode=None,
colsample_bytree=None,
early_stopping_rounds=None,
enable_categorical=False,
eval_metric=None, feature_types=None,
gamma=None, gpu_id=None,
grow_policy=None, importance_type=None,
interaction_constraints=None,
learning_rate=0.3, max_bin=None,
max_cat_threshold=None,
max_cat_to_onehot=None,
max_delta_step=None, max_depth=3,
max_leaves=None, min_child_weight=None,
missing=nan, monotone_constraints=None,
n_estimators=100, n_jobs=None,
num_parallel_tree=None, predictor=None,
random_state=None, ...),
max_features=211, threshold=-inf)_0.5_3_250_527"	9.06	0.588	0	1	0
31	200_SelectFromModel(estimator=XGBClassifier(base_score=None, booster=None,
callbacks=None, colsample_bylevel=None,
colsample_bynode=None,
colsample_bytree=None,
early_stopping_rounds=None,
enable_categorical=False,
eval_metric=None, feature_types=None,
gamma=None, gpu_id=None,
grow_policy=None, importance_type=None,
interaction_constraints=None,
learning_rate=0.3, max_bin=None,
max_cat_threshold=None,
max_cat_to_onehot=None,
max_delta_step=None, max_depth=3,
max_leaves=None, min_child_weight=None,
missing=nan, monotone_constraints=None,
n_estimators=100, n_jobs=None,
num_parallel_tree=None, predictor=None,
random_state=None, ...),
max_features=211, threshold=-inf)_0.3_3_100_211"	100_SelectFromModel(estimator=XGBClassifier(base_score=None, booster=None,
callbacks=None, colsample_bylevel=None,
colsample_bynode=None,
colsample_bytree=None,
early_stopping_rounds=None,
enable_categorical=False,
eval_metric=None, feature_types=None,
gamma=None, gpu_id=None,
grow_policy=None, importance_type=None,
interaction_constraints=None,
learning_rate=0.3, max_bin=None,
max_cat_threshold=None,
max_cat_to_onehot=None,
max_delta_step=None, max_depth=3,
max_leaves=None, min_child_weight=None,
missing=nan, monotone_constraints=None,
n_estimators=100, n_jobs=None,
num_parallel_tree=None, predictor=None,
random_state=None, ...),
max_features=211, threshold=-inf)_0.5_3_500_422"	9.971	0.267	0	1	0
32	200_SelectFromModel(estimator=XGBClassifier(base_score=None, booster=None,
callbacks=None, colsample_bylevel=None,
colsample_bynode=None,
colsample_bytree=None,
early_stopping_rounds=None,
enable_categorical=False,
eval_metric=None, feature_types=None,
gamma=None, gpu_id=None,
grow_policy=None, importance_type=None,
interaction_constraints=None,
learning_rate=0.3, max_bin=None,
max_cat_threshold=None,
max_cat_to_onehot=None,
max_delta_step=None, max_depth=3,
max_leaves=None, min_child_weight=None,
missing=nan, monotone_constraints=None,
n_estimators=100, n_jobs=None,
num_parallel_tree=None, predictor=None,
random_state=None, ...),
max_features=211, threshold=-inf)_0.3_3_100_211"	200_SelectFromModel(estimator=XGBClassifier(base_score=None, booster=None,
callbacks=None, colsample_bylevel=None,
colsample_bynode=None,
colsample_bytree=None,
early_stopping_rounds=None,
enable_categorical=False,
eval_metric=None, feature_types=None,
gamma=None, gpu_id=None,
grow_policy=None, importance_type=None,
interaction_constraints=None,
learning_rate=0.3, max_bin=None,
max_cat_threshold=None,
max_cat_to_onehot=None,
max_delta_step=None, max_depth=3,
max_leaves=None, min_child_weight=None,
missing=nan, monotone_constraints=None,
n_estimators=100, n_jobs=None,
num_parallel_tree=None, predictor=None,
random_state=None, ...),
max_features=211, threshold=-inf)_0.5_5_250_211"	5.717	1.0	0	0.999	0.001
33	200_SelectFromModel(estimator=XGBClassifier(base_score=None, booster=None,
callbacks=None, colsample_bylevel=None,
colsample_bynode=None,
colsample_bytree=None,
early_stopping_rounds=None,
enable_categorical=False,
eval_metric=None, feature_types=None,
gamma=None, gpu_id=None,
grow_policy=None, importance_type=None,
interaction_constraints=None,
learning_rate=0.3, max_bin=None,
max_cat_threshold=None,
max_cat_to_onehot=None,
max_delta_step=None, max_depth=3,
max_leaves=None, min_child_weight=None,
missing=nan, monotone_constraints=None,
n_estimators=100, n_jobs=None,
num_parallel_tree=None, predictor=None,
random_state=None, ...),
max_features=211, threshold=-inf)_0.3_3_100_211"	200_SelectFromModel(estimator=XGBClassifier(base_score=None, booster=None,
callbacks=None, colsample_bylevel=None,
colsample_bynode=None,
colsample_bytree=None,
early_stopping_rounds=None,
enable_categorical=False,
eval_metric=None, feature_types=None,
gamma=None, gpu_id=None,
grow_policy=None, importance_type=None,
interaction_constraints=None,
learning_rate=0.3, max_bin=None,
max_cat_threshold=None,
max_cat_to_onehot=None,
max_delta_step=None, max_depth=3,
max_leaves=None, min_child_weight=None,
missing=nan, monotone_constraints=None,
n_estimators=100, n_jobs=None,
num_parallel_tree=None, predictor=None,
random_state=None, ...),
max_features=211, threshold=-inf)_0.1_3_250_422"	3.776	1.0	0.001	0.994	0.005
34	200_SelectFromModel(estimator=XGBClassifier(base_score=None, booster=None,
callbacks=None, colsample_bylevel=None,
colsample_bynode=None,
colsample_bytree=None,
early_stopping_rounds=None,
enable_categorical=False,
eval_metric=None, feature_types=None,
gamma=None, gpu_id=None,
grow_policy=None, importance_type=None,
interaction_constraints=None,
learning_rate=0.3, max_bin=None,
max_cat_threshold=None,
max_cat_to_onehot=None,
max_delta_step=None, max_depth=3,
max_leaves=None, min_child_weight=None,
missing=nan, monotone_constraints=None,
n_estimators=100, n_jobs=None,
num_parallel_tree=None, predictor=None,
random_state=None, ...),
max_features=211, threshold=-inf)_0.3_3_100_211"	100_SelectFromModel(estimator=XGBClassifier(base_score=None, booster=None,
callbacks=None, colsample_bylevel=None,
colsample_bynode=None,
colsample_bytree=None,
early_stopping_rounds=None,
enable_categorical=False,
eval_metric=None, feature_types=None,
gamma=None, gpu_id=None,
grow_policy=None, importance_type=None,
interaction_constraints=None,
learning_rate=0.3, max_bin=None,
max_cat_threshold=None,
max_cat_to_onehot=None,
max_delta_step=None, max_depth=3,
max_leaves=None, min_child_weight=None,
missing=nan, monotone_constraints=None,
n_estimators=100, n_jobs=None,
num_parallel_tree=None, predictor=None,
random_state=None, ...),
max_features=211, threshold=-inf)_0.5_5_100_211"	5.517	1.0	0	0.999	0.001
35	200_SelectFromModel(estimator=XGBClassifier(base_score=None, booster=None,
callbacks=None, colsample_bylevel=None,
colsample_bynode=None,
colsample_bytree=None,
early_stopping_rounds=None,
enable_categorical=False,
eval_metric=None, feature_types=None,
gamma=None, gpu_id=None,
grow_policy=None, importance_type=None,
interaction_constraints=None,
learning_rate=0.3, max_bin=None,
max_cat_threshold=None,
max_cat_to_onehot=None,
max_delta_step=None, max_depth=3,
max_leaves=None, min_child_weight=None,
missing=nan, monotone_constraints=None,
n_estimators=100, n_jobs=None,
num_parallel_tree=None, predictor=None,
random_state=None, ...),
max_features=211, threshold=-inf)_0.3_3_100_211"	200_SelectFromModel(estimator=XGBClassifier(base_score=None, booster=None,
callbacks=None, colsample_bylevel=None,
colsample_bynode=None,
colsample_bytree=None,
early_stopping_rounds=None,
enable_categorical=False,
eval_metric=None, feature_types=None,
gamma=None, gpu_id=None,
grow_policy=None, importance_type=None,
interaction_constraints=None,
learning_rate=0.3, max_bin=None,
max_cat_threshold=None,
max_cat_to_onehot=None,
max_delta_step=None, max_depth=3,
max_leaves=None, min_child_weight=None,
missing=nan, monotone_constraints=None,
n_estimators=100, n_jobs=None,
num_parallel_tree=None, predictor=None,
random_state=None, ...),
max_features=211, threshold=-inf)_0.3_3_250_422"	7.603	1.0	0	1	0
36	200_SelectFromModel(estimator=XGBClassifier(base_score=None, booster=None,
callbacks=None, colsample_bylevel=None,
colsample_bynode=None,
colsample_bytree=None,
early_stopping_rounds=None,
enable_categorical=False,
eval_metric=None, feature_types=None,
gamma=None, gpu_id=None,
grow_policy=None, importance_type=None,
interaction_constraints=None,
learning_rate=0.3, max_bin=None,
max_cat_threshold=None,
max_cat_to_onehot=None,
max_delta_step=None, max_depth=3,
max_leaves=None, min_child_weight=None,
missing=nan, monotone_constraints=None,
n_estimators=100, n_jobs=None,
num_parallel_tree=None, predictor=None,
random_state=None, ...),
max_features=211, threshold=-inf)_0.3_3_100_211"	200_SelectFromModel(estimator=XGBClassifier(base_score=None, booster=None,
callbacks=None, colsample_bylevel=None,
colsample_bynode=None,
colsample_bytree=None,
early_stopping_rounds=None,
enable_categorical=False,
eval_metric=None, feature_types=None,
gamma=None, gpu_id=None,
grow_policy=None, importance_type=None,
interaction_constraints=None,
learning_rate=0.3, max_bin=None,
max_cat_threshold=None,
max_cat_to_onehot=None,
max_delta_step=None, max_depth=3,
max_leaves=None, min_child_weight=None,
missing=nan, monotone_constraints=None,
n_estimators=100, n_jobs=None,
num_parallel_tree=None, predictor=None,
random_state=None, ...),
max_features=211, threshold=-inf)_0.5_3_500_527"	9.283	0.482	0	1	0
37	200_SelectFromModel(estimator=XGBClassifier(base_score=None, booster=None,
callbacks=None, colsample_bylevel=None,
colsample_bynode=None,
colsample_bytree=None,
early_stopping_rounds=None,
enable_categorical=False,
eval_metric=None, feature_types=None,
gamma=None, gpu_id=None,
grow_policy=None, importance_type=None,
interaction_constraints=None,
learning_rate=0.3, max_bin=None,
max_cat_threshold=None,
max_cat_to_onehot=None,
max_delta_step=None, max_depth=3,
max_leaves=None, min_child_weight=None,
missing=nan, monotone_constraints=None,
n_estimators=100, n_jobs=None,
num_parallel_tree=None, predictor=None,
random_state=None, ...),
max_features=211, threshold=-inf)_0.3_3_100_211"	100_SelectFromModel(estimator=XGBClassifier(base_score=None, booster=None,
callbacks=None, colsample_bylevel=None,
colsample_bynode=None,
colsample_bytree=None,
early_stopping_rounds=None,
enable_categorical=False,
eval_metric=None, feature_types=None,
gamma=None, gpu_id=None,
grow_policy=None, importance_type=None,
interaction_constraints=None,
learning_rate=0.3, max_bin=None,
max_cat_threshold=None,
max_cat_to_onehot=None,
max_delta_step=None, max_depth=3,
max_leaves=None, min_child_weight=None,
missing=nan, monotone_constraints=None,
n_estimators=100, n_jobs=None,
num_parallel_tree=None, predictor=None,
random_state=None, ...),
max_features=211, threshold=-inf)_0.5_3_250_527"	10.675	0.151	0	1	0
38	200_SelectFromModel(estimator=XGBClassifier(base_score=None, booster=None,
callbacks=None, colsample_bylevel=None,
colsample_bynode=None,
colsample_bytree=None,
early_stopping_rounds=None,
enable_categorical=False,
eval_metric=None, feature_types=None,
gamma=None, gpu_id=None,
grow_policy=None, importance_type=None,
interaction_constraints=None,
learning_rate=0.3, max_bin=None,
max_cat_threshold=None,
max_cat_to_onehot=None,
max_delta_step=None, max_depth=3,
max_leaves=None, min_child_weight=None,
missing=nan, monotone_constraints=None,
n_estimators=100, n_jobs=None,
num_parallel_tree=None, predictor=None,
random_state=None, ...),
max_features=211, threshold=-inf)_0.3_3_100_211"	100_SelectFromModel(estimator=XGBClassifier(base_score=None, booster=None,
callbacks=None, colsample_bylevel=None,
colsample_bynode=None,
colsample_bytree=None,
early_stopping_rounds=None,
enable_categorical=False,
eval_metric=None, feature_types=None,
gamma=None, gpu_id=None,
grow_policy=None, importance_type=None,
interaction_constraints=None,
learning_rate=0.3, max_bin=None,
max_cat_threshold=None,
max_cat_to_onehot=None,
max_delta_step=None, max_depth=3,
max_leaves=None, min_child_weight=None,
missing=nan, monotone_constraints=None,
n_estimators=100, n_jobs=None,
num_parallel_tree=None, predictor=None,
random_state=None, ...),
max_features=211, threshold=-inf)_0.5_3_500_527"	10.645	0.154	0	1	0
39	200_SelectFromModel(estimator=XGBClassifier(base_score=None, booster=None,
callbacks=None, colsample_bylevel=None,
colsample_bynode=None,
colsample_bytree=None,
early_stopping_rounds=None,
enable_categorical=False,
eval_metric=None, feature_types=None,
gamma=None, gpu_id=None,
grow_policy=None, importance_type=None,
interaction_constraints=None,
learning_rate=0.3, max_bin=None,
max_cat_threshold=None,
max_cat_to_onehot=None,
max_delta_step=None, max_depth=3,
max_leaves=None, min_child_weight=None,
missing=nan, monotone_constraints=None,
n_estimators=100, n_jobs=None,
num_parallel_tree=None, predictor=None,
random_state=None, ...),
max_features=211, threshold=-inf)_0.3_3_100_211"	200_SelectFromModel(estimator=XGBClassifier(base_score=None, booster=None,
callbacks=None, colsample_bylevel=None,
colsample_bynode=None,
colsample_bytree=None,
early_stopping_rounds=None,
enable_categorical=False,
eval_metric=None, feature_types=None,
gamma=None, gpu_id=None,
grow_policy=None, importance_type=None,
interaction_constraints=None,
learning_rate=0.3, max_bin=None,
max_cat_threshold=None,
max_cat_to_onehot=None,
max_delta_step=None, max_depth=3,
max_leaves=None, min_child_weight=None,
missing=nan, monotone_constraints=None,
n_estimators=100, n_jobs=None,
num_parallel_tree=None, predictor=None,
random_state=None, ...),
max_features=211, threshold=-inf)_0.1_3_500_211"	2.931	1.0	0.004	0.982	0.014
40	200_SelectFromModel(estimator=XGBClassifier(base_score=None, booster=None,
callbacks=None, colsample_bylevel=None,
colsample_bynode=None,
colsample_bytree=None,
early_stopping_rounds=None,
enable_categorical=False,
eval_metric=None, feature_types=None,
gamma=None, gpu_id=None,
grow_policy=None, importance_type=None,
interaction_constraints=None,
learning_rate=0.3, max_bin=None,
max_cat_threshold=None,
max_cat_to_onehot=None,
max_delta_step=None, max_depth=3,
max_leaves=None, min_child_weight=None,
missing=nan, monotone_constraints=None,
n_estimators=100, n_jobs=None,
num_parallel_tree=None, predictor=None,
random_state=None, ...),
max_features=211, threshold=-inf)_0.3_3_100_211"	200_SelectFromModel(estimator=XGBClassifier(base_score=None, booster=None,
callbacks=None, colsample_bylevel=None,
colsample_bynode=None,
colsample_bytree=None,
early_stopping_rounds=None,
enable_categorical=False,
eval_metric=None, feature_types=None,
gamma=None, gpu_id=None,
grow_policy=None, importance_type=None,
interaction_constraints=None,
learning_rate=0.3, max_bin=None,
max_cat_threshold=None,
max_cat_to_onehot=None,
max_delta_step=None, max_depth=3,
max_leaves=None, min_child_weight=None,
missing=nan, monotone_constraints=None,
n_estimators=100, n_jobs=None,
num_parallel_tree=None, predictor=None,
random_state=None, ...),
max_features=211, threshold=-inf)_0.3_3_500_422"	7.921	1.0	0	1	0
41	200_SelectFromModel(estimator=XGBClassifier(base_score=None, booster=None,
callbacks=None, colsample_bylevel=None,
colsample_bynode=None,
colsample_bytree=None,
early_stopping_rounds=None,
enable_categorical=False,
eval_metric=None, feature_types=None,
gamma=None, gpu_id=None,
grow_policy=None, importance_type=None,
interaction_constraints=None,
learning_rate=0.3, max_bin=None,
max_cat_threshold=None,
max_cat_to_onehot=None,
max_delta_step=None, max_depth=3,
max_leaves=None, min_child_weight=None,
missing=nan, monotone_constraints=None,
n_estimators=100, n_jobs=None,
num_parallel_tree=None, predictor=None,
random_state=None, ...),
max_features=211, threshold=-inf)_0.3_3_100_211"	100_SelectFromModel(estimator=XGBClassifier(base_score=None, booster=None,
callbacks=None, colsample_bylevel=None,
colsample_bynode=None,
colsample_bytree=None,
early_stopping_rounds=None,
enable_categorical=False,
eval_metric=None, feature_types=None,
gamma=None, gpu_id=None,
grow_policy=None, importance_type=None,
interaction_constraints=None,
learning_rate=0.3, max_bin=None,
max_cat_threshold=None,
max_cat_to_onehot=None,
max_delta_step=None, max_depth=3,
max_leaves=None, min_child_weight=None,
missing=nan, monotone_constraints=None,
n_estimators=100, n_jobs=None,
num_parallel_tree=None, predictor=None,
random_state=None, ...),
max_features=211, threshold=-inf)_0.1_3_250_211"	1.94	1.0	0.026	0.933	0.041
42	200_SelectFromModel(estimator=XGBClassifier(base_score=None, booster=None,
callbacks=None, colsample_bylevel=None,
colsample_bynode=None,
colsample_bytree=None,
early_stopping_rounds=None,
enable_categorical=False,
eval_metric=None, feature_types=None,
gamma=None, gpu_id=None,
grow_policy=None, importance_type=None,
interaction_constraints=None,
learning_rate=0.3, max_bin=None,
max_cat_threshold=None,
max_cat_to_onehot=None,
max_delta_step=None, max_depth=3,
max_leaves=None, min_child_weight=None,
missing=nan, monotone_constraints=None,
n_estimators=100, n_jobs=None,
num_parallel_tree=None, predictor=None,
random_state=None, ...),
max_features=211, threshold=-inf)_0.3_3_100_211"	100_SelectFromModel(estimator=XGBClassifier(base_score=None, booster=None,
callbacks=None, colsample_bylevel=None,
colsample_bynode=None,
colsample_bytree=None,
early_stopping_rounds=None,
enable_categorical=False,
eval_metric=None, feature_types=None,
gamma=None, gpu_id=None,
grow_policy=None, importance_type=None,
interaction_constraints=None,
learning_rate=0.3, max_bin=None,
max_cat_threshold=None,
max_cat_to_onehot=None,
max_delta_step=None, max_depth=3,
max_leaves=None, min_child_weight=None,
missing=nan, monotone_constraints=None,
n_estimators=100, n_jobs=None,
num_parallel_tree=None, predictor=None,
random_state=None, ...),
max_features=211, threshold=-inf)_0.3_3_250_422"	7.577	1.0	0	1	0
43	200_SelectFromModel(estimator=XGBClassifier(base_score=None, booster=None,
callbacks=None, colsample_bylevel=None,
colsample_bynode=None,
colsample_bytree=None,
early_stopping_rounds=None,
enable_categorical=False,
eval_metric=None, feature_types=None,
gamma=None, gpu_id=None,
grow_policy=None, importance_type=None,
interaction_constraints=None,
learning_rate=0.3, max_bin=None,
max_cat_threshold=None,
max_cat_to_onehot=None,
max_delta_step=None, max_depth=3,
max_leaves=None, min_child_weight=None,
missing=nan, monotone_constraints=None,
n_estimators=100, n_jobs=None,
num_parallel_tree=None, predictor=None,
random_state=None, ...),
max_features=211, threshold=-inf)_0.3_3_100_211"	200_SelectFromModel(estimator=XGBClassifier(base_score=None, booster=None,
callbacks=None, colsample_bylevel=None,
colsample_bynode=None,
colsample_bytree=None,
early_stopping_rounds=None,
enable_categorical=False,
eval_metric=None, feature_types=None,
gamma=None, gpu_id=None,
grow_policy=None, importance_type=None,
interaction_constraints=None,
learning_rate=0.3, max_bin=None,
max_cat_threshold=None,
max_cat_to_onehot=None,
max_delta_step=None, max_depth=3,
max_leaves=None, min_child_weight=None,
missing=nan, monotone_constraints=None,
n_estimators=100, n_jobs=None,
num_parallel_tree=None, predictor=None,
random_state=None, ...),
max_features=211, threshold=-inf)_0.5_5_500_211"	6.929	1.0	0	1	0
44	200_SelectFromModel(estimator=XGBClassifier(base_score=None, booster=None,
callbacks=None, colsample_bylevel=None,
colsample_bynode=None,
colsample_bytree=None,
early_stopping_rounds=None,
enable_categorical=False,
eval_metric=None, feature_types=None,
gamma=None, gpu_id=None,
grow_policy=None, importance_type=None,
interaction_constraints=None,
learning_rate=0.3, max_bin=None,
max_cat_threshold=None,
max_cat_to_onehot=None,
max_delta_step=None, max_depth=3,
max_leaves=None, min_child_weight=None,
missing=nan, monotone_constraints=None,
n_estimators=100, n_jobs=None,
num_parallel_tree=None, predictor=None,
random_state=None, ...),
max_features=211, threshold=-inf)_0.3_3_100_211"	100_SelectFromModel(estimator=XGBClassifier(base_score=None, booster=None,
callbacks=None, colsample_bylevel=None,
colsample_bynode=None,
colsample_bytree=None,
early_stopping_rounds=None,
enable_categorical=False,
eval_metric=None, feature_types=None,
gamma=None, gpu_id=None,
grow_policy=None, importance_type=None,
interaction_constraints=None,
learning_rate=0.3, max_bin=None,
max_cat_threshold=None,
max_cat_to_onehot=None,
max_delta_step=None, max_depth=3,
max_leaves=None, min_child_weight=None,
missing=nan, monotone_constraints=None,
n_estimators=100, n_jobs=None,
num_parallel_tree=None, predictor=None,
random_state=None, ...),
max_features=211, threshold=-inf)_0.5_5_250_211"	6.001	1.0	0	1	0
45	200_SelectFromModel(estimator=XGBClassifier(base_score=None, booster=None,
callbacks=None, colsample_bylevel=None,
colsample_bynode=None,
colsample_bytree=None,
early_stopping_rounds=None,
enable_categorical=False,
eval_metric=None, feature_types=None,
gamma=None, gpu_id=None,
grow_policy=None, importance_type=None,
interaction_constraints=None,
learning_rate=0.3, max_bin=None,
max_cat_threshold=None,
max_cat_to_onehot=None,
max_delta_step=None, max_depth=3,
max_leaves=None, min_child_weight=None,
missing=nan, monotone_constraints=None,
n_estimators=100, n_jobs=None,
num_parallel_tree=None, predictor=None,
random_state=None, ...),
max_features=211, threshold=-inf)_0.3_3_100_211"	100_SelectFromModel(estimator=XGBClassifier(base_score=None, booster=None,
callbacks=None, colsample_bylevel=None,
colsample_bynode=None,
colsample_bytree=None,
early_stopping_rounds=None,
enable_categorical=False,
eval_metric=None, feature_types=None,
gamma=None, gpu_id=None,
grow_policy=None, importance_type=None,
interaction_constraints=None,
learning_rate=0.3, max_bin=None,
max_cat_threshold=None,
max_cat_to_onehot=None,
max_delta_step=None, max_depth=3,
max_leaves=None, min_child_weight=None,
missing=nan, monotone_constraints=None,
n_estimators=100, n_jobs=None,
num_parallel_tree=None, predictor=None,
random_state=None, ...),
max_features=211, threshold=-inf)_0.1_3_250_422"	3.469	1.0	0.002	0.992	0.006
46	200_SelectFromModel(estimator=XGBClassifier(base_score=None, booster=None,
callbacks=None, colsample_bylevel=None,
colsample_bynode=None,
colsample_bytree=None,
early_stopping_rounds=None,
enable_categorical=False,
eval_metric=None, feature_types=None,
gamma=None, gpu_id=None,
grow_policy=None, importance_type=None,
interaction_constraints=None,
learning_rate=0.3, max_bin=None,
max_cat_threshold=None,
max_cat_to_onehot=None,
max_delta_step=None, max_depth=3,
max_leaves=None, min_child_weight=None,
missing=nan, monotone_constraints=None,
n_estimators=100, n_jobs=None,
num_parallel_tree=None, predictor=None,
random_state=None, ...),
max_features=211, threshold=-inf)_0.3_3_100_211"	200_SelectFromModel(estimator=XGBClassifier(base_score=None, booster=None,
callbacks=None, colsample_bylevel=None,
colsample_bynode=None,
colsample_bytree=None,
early_stopping_rounds=None,
enable_categorical=False,
eval_metric=None, feature_types=None,
gamma=None, gpu_id=None,
grow_policy=None, importance_type=None,
interaction_constraints=None,
learning_rate=0.3, max_bin=None,
max_cat_threshold=None,
max_cat_to_onehot=None,
max_delta_step=None, max_depth=3,
max_leaves=None, min_child_weight=None,
missing=nan, monotone_constraints=None,
n_estimators=100, n_jobs=None,
num_parallel_tree=None, predictor=None,
random_state=None, ...),
max_features=211, threshold=-inf)_0.1_3_250_527"	5.194	1.0	0	0.999	0.001
47	200_SelectFromModel(estimator=XGBClassifier(base_score=None, booster=None,
callbacks=None, colsample_bylevel=None,
colsample_bynode=None,
colsample_bytree=None,
early_stopping_rounds=None,
enable_categorical=False,
eval_metric=None, feature_types=None,
gamma=None, gpu_id=None,
grow_policy=None, importance_type=None,
interaction_constraints=None,
learning_rate=0.3, max_bin=None,
max_cat_threshold=None,
max_cat_to_onehot=None,
max_delta_step=None, max_depth=3,
max_leaves=None, min_child_weight=None,
missing=nan, monotone_constraints=None,
n_estimators=100, n_jobs=None,
num_parallel_tree=None, predictor=None,
random_state=None, ...),
max_features=211, threshold=-inf)_0.3_3_100_211"	100_SelectFromModel(estimator=XGBClassifier(base_score=None, booster=None,
callbacks=None, colsample_bylevel=None,
colsample_bynode=None,
colsample_bytree=None,
early_stopping_rounds=None,
enable_categorical=False,
eval_metric=None, feature_types=None,
gamma=None, gpu_id=None,
grow_policy=None, importance_type=None,
interaction_constraints=None,
learning_rate=0.3, max_bin=None,
max_cat_threshold=None,
max_cat_to_onehot=None,
max_delta_step=None, max_depth=3,
max_leaves=None, min_child_weight=None,
missing=nan, monotone_constraints=None,
n_estimators=100, n_jobs=None,
num_parallel_tree=None, predictor=None,
random_state=None, ...),
max_features=211, threshold=-inf)_0.3_3_500_422"	8.006	1.0	0	1	0
48	200_SelectFromModel(estimator=XGBClassifier(base_score=None, booster=None,
callbacks=None, colsample_bylevel=None,
colsample_bynode=None,
colsample_bytree=None,
early_stopping_rounds=None,
enable_categorical=False,
eval_metric=None, feature_types=None,
gamma=None, gpu_id=None,
grow_policy=None, importance_type=None,
interaction_constraints=None,
learning_rate=0.3, max_bin=None,
max_cat_threshold=None,
max_cat_to_onehot=None,
max_delta_step=None, max_depth=3,
max_leaves=None, min_child_weight=None,
missing=nan, monotone_constraints=None,
n_estimators=100, n_jobs=None,
num_parallel_tree=None, predictor=None,
random_state=None, ...),
max_features=211, threshold=-inf)_0.3_3_100_211"	200_SelectFromModel(estimator=XGBClassifier(base_score=None, booster=None,
callbacks=None, colsample_bylevel=None,
colsample_bynode=None,
colsample_bytree=None,
early_stopping_rounds=None,
enable_categorical=False,
eval_metric=None, feature_types=None,
gamma=None, gpu_id=None,
grow_policy=None, importance_type=None,
interaction_constraints=None,
learning_rate=0.3, max_bin=None,
max_cat_threshold=None,
max_cat_to_onehot=None,
max_delta_step=None, max_depth=3,
max_leaves=None, min_child_weight=None,
missing=nan, monotone_constraints=None,
n_estimators=100, n_jobs=None,
num_parallel_tree=None, predictor=None,
random_state=None, ...),
max_features=211, threshold=-inf)_0.3_3_250_527"	8.142	1.0	0	1	0
49	200_SelectFromModel(estimator=XGBClassifier(base_score=None, booster=None,
callbacks=None, colsample_bylevel=None,
colsample_bynode=None,
colsample_bytree=None,
early_stopping_rounds=None,
enable_categorical=False,
eval_metric=None, feature_types=None,
gamma=None, gpu_id=None,
grow_policy=None, importance_type=None,
interaction_constraints=None,
learning_rate=0.3, max_bin=None,
max_cat_threshold=None,
max_cat_to_onehot=None,
max_delta_step=None, max_depth=3,
max_leaves=None, min_child_weight=None,
missing=nan, monotone_constraints=None,
n_estimators=100, n_jobs=None,
num_parallel_tree=None, predictor=None,
random_state=None, ...),
max_features=211, threshold=-inf)_0.3_3_100_211"	100_SelectFromModel(estimator=XGBClassifier(base_score=None, booster=None,
callbacks=None, colsample_bylevel=None,
colsample_bynode=None,
colsample_bytree=None,
early_stopping_rounds=None,
enable_categorical=False,
eval_metric=None, feature_types=None,
gamma=None, gpu_id=None,
grow_policy=None, importance_type=None,
interaction_constraints=None,
learning_rate=0.3, max_bin=None,
max_cat_threshold=None,
max_cat_to_onehot=None,
max_delta_step=None, max_depth=3,
max_leaves=None, min_child_weight=None,
missing=nan, monotone_constraints=None,
n_estimators=100, n_jobs=None,
num_parallel_tree=None, predictor=None,
random_state=None, ...),
max_features=211, threshold=-inf)_0.5_5_500_211"	6.938	1.0	0	1	0
50	200_SelectFromModel(estimator=XGBClassifier(base_score=None, booster=None,
callbacks=None, colsample_bylevel=None,
colsample_bynode=None,
colsample_bytree=None,
early_stopping_rounds=None,
enable_categorical=False,
eval_metric=None, feature_types=None,
gamma=None, gpu_id=None,
grow_policy=None, importance_type=None,
interaction_constraints=None,
learning_rate=0.3, max_bin=None,
max_cat_threshold=None,
max_cat_to_onehot=None,
max_delta_step=None, max_depth=3,
max_leaves=None, min_child_weight=None,
missing=nan, monotone_constraints=None,
n_estimators=100, n_jobs=None,
num_parallel_tree=None, predictor=None,
random_state=None, ...),
max_features=211, threshold=-inf)_0.3_3_100_211"	100_SelectFromModel(estimator=XGBClassifier(base_score=None, booster=None,
callbacks=None, colsample_bylevel=None,
colsample_bynode=None,
colsample_bytree=None,
early_stopping_rounds=None,
enable_categorical=False,
eval_metric=None, feature_types=None,
gamma=None, gpu_id=None,
grow_policy=None, importance_type=None,
interaction_constraints=None,
learning_rate=0.3, max_bin=None,
max_cat_threshold=None,
max_cat_to_onehot=None,
max_delta_step=None, max_depth=3,
max_leaves=None, min_child_weight=None,
missing=nan, monotone_constraints=None,
n_estimators=100, n_jobs=None,
num_parallel_tree=None, predictor=None,
random_state=None, ...),
max_features=211, threshold=-inf)_0.3_3_250_527"	8.576	0.92	0	1	0
51	200_SelectFromModel(estimator=XGBClassifier(base_score=None, booster=None,
callbacks=None, colsample_bylevel=None,
colsample_bynode=None,
colsample_bytree=None,
early_stopping_rounds=None,
enable_categorical=False,
eval_metric=None, feature_types=None,
gamma=None, gpu_id=None,
grow_policy=None, importance_type=None,
interaction_constraints=None,
[truncated: 1,046,576+ more rows]

## Sheet: XGBoost_SVC_Dmodels_cross-valid
kernel	params	rank_test_score	mean_test_score	std_test_score
200_SelectFromModel(estimator=XGBClassifier(base_score=None, booster=None,
callbacks=None, colsample_bylevel=None,
colsample_bynode=None,
colsample_bytree=None,
early_stopping_rounds=None,
enable_categorical=False,
eval_metric=None, feature_types=None,
gamma=None, gpu_id=None,
grow_policy=None, importance_type=None,
interaction_constraints=None,
learning_rate=0.3, max_bin=None,
max_cat_threshold=None,
max_cat_to_onehot=None,
max_delta_step=None, max_depth=3,
max_leaves=None, min_child_weight=None,
missing=nan, monotone_constraints=None,
n_estimators=100, n_jobs=None,
num_parallel_tree=None, predictor=None,
random_state=None, ...),
max_features=211, threshold=-inf)_0.3_3_100_211"	{'classify__C': 200, 'feature_selection': SelectFromModel(estimator=XGBClassifier(base_score=None, booster=None,
callbacks=None, colsample_bylevel=None,
colsample_bynode=None,
colsample_bytree=None,
early_stopping_rounds=None,
enable_categorical=False,
eval_metric=None, feature_types=None,
gamma=None, gpu_id=None,
grow_policy=None, importance_type=None,
interaction_constraints=None,
learning_rate=0.3, max_bin=None,
max_cat_threshold=None,
max_cat_to_onehot=None,
max_delta_step=None, max_depth=3,
max_leaves=None, min_child_weight=None,
missing=nan, monotone_constraints=None,
n_estimators=100, n_jobs=None,
num_parallel_tree=None, predictor=None,
random_state=None, ...),
max_features=211, threshold=-inf), 'feature_selection__estimator__learning_rate': 0.3, 'feature_selection__estimator__max_depth': 3, 'feature_selection__estimator__n_estimators': 100, 'feature_selection__max_features': 211}"	1	0.870621	0.038416
100_SelectFromModel(estimator=XGBClassifier(base_score=None, booster=None,
callbacks=None, colsample_bylevel=None,
colsample_bynode=None,
colsample_bytree=None,
early_stopping_rounds=None,
enable_categorical=False,
eval_metric=None, feature_types=None,
gamma=None, gpu_id=None,
grow_policy=None, importance_type=None,
interaction_constraints=None,
learning_rate=0.3, max_bin=None,
max_cat_threshold=None,
max_cat_to_onehot=None,
max_delta_step=None, max_depth=3,
max_leaves=None, min_child_weight=None,
missing=nan, monotone_constraints=None,
n_estimators=100, n_jobs=None,
num_parallel_tree=None, predictor=None,
random_state=None, ...),
max_features=211, threshold=-inf)_0.3_3_100_211"	{'classify__C': 100, 'feature_selection': SelectFromModel(estimator=XGBClassifier(base_score=None, booster=None,
callbacks=None, colsample_bylevel=None,
colsample_bynode=None,
colsample_bytree=None,
early_stopping_rounds=None,
enable_categorical=False,
eval_metric=None, feature_types=None,
gamma=None, gpu_id=None,
grow_policy=None, importance_type=None,
interaction_constraints=None,
learning_rate=0.3, max_bin=None,
max_cat_threshold=None,
max_cat_to_onehot=None,
max_delta_step=None, max_depth=3,
max_leaves=None, min_child_weight=None,
missing=nan, monotone_constraints=None,
n_estimators=100, n_jobs=None,
num_parallel_tree=None, predictor=None,
random_state=None, ...),
max_features=211, threshold=-inf), 'feature_selection__estimator__learning_rate': 0.3, 'feature_selection__estimator__max_depth': 3, 'feature_selection__estimator__n_estimators': 100, 'feature_selection__max_features': 211}"	2	0.858162	0.0373135
200_SelectFromModel(estimator=XGBClassifier(base_score=None, booster=None,
callbacks=None, colsample_bylevel=None,
colsample_bynode=None,
colsample_bytree=None,
early_stopping_rounds=None,
enable_categorical=False,
eval_metric=None, feature_types=None,
gamma=None, gpu_id=None,
grow_policy=None, importance_type=None,
interaction_constraints=None,
learning_rate=0.3, max_bin=None,
max_cat_threshold=None,
max_cat_to_onehot=None,
max_delta_step=None, max_depth=3,
max_leaves=None, min_child_weight=None,
missing=nan, monotone_constraints=None,
n_estimators=100, n_jobs=None,
num_parallel_tree=None, predictor=None,
random_state=None, ...),
max_features=211, threshold=-inf)_0.5_3_100_211"	{'classify__C': 200, 'feature_selection': SelectFromModel(estimator=XGBClassifier(base_score=None, booster=None,
callbacks=None, colsample_bylevel=None,
colsample_bynode=None,
colsample_bytree=None,
early_stopping_rounds=None,
enable_categorical=False,
eval_metric=None, feature_types=None,
gamma=None, gpu_id=None,
grow_policy=None, importance_type=None,
interaction_constraints=None,
learning_rate=0.3, max_bin=None,
max_cat_threshold=None,
max_cat_to_onehot=None,
max_delta_step=None, max_depth=3,
max_leaves=None, min_child_weight=None,
missing=nan, monotone_constraints=None,
n_estimators=100, n_jobs=None,
num_parallel_tree=None, predictor=None,
random_state=None, ...),
max_features=211, threshold=-inf), 'feature_selection__estimator__learning_rate': 0.5, 'feature_selection__estimator__max_depth': 3, 'feature_selection__estimator__n_estimators': 100, 'feature_selection__max_features': 211}"	3	0.853837	0.0492124
100_SelectFromModel(estimator=XGBClassifier(base_score=None, booster=None,
callbacks=None, colsample_bylevel=None,
colsample_bynode=None,
colsample_bytree=None,
early_stopping_rounds=None,
enable_categorical=False,
eval_metric=None, feature_types=None,
gamma=None, gpu_id=None,
grow_policy=None, importance_type=None,
interaction_constraints=None,
learning_rate=0.3, max_bin=None,
max_cat_threshold=None,
max_cat_to_onehot=None,
max_delta_step=None, max_depth=3,
max_leaves=None, min_child_weight=None,
missing=nan, monotone_constraints=None,
n_estimators=100, n_jobs=None,
num_parallel_tree=None, predictor=None,
random_state=None, ...),
max_features=211, threshold=-inf)_0.5_3_100_211"	{'classify__C': 100, 'feature_selection': SelectFromModel(estimator=XGBClassifier(base_score=None, booster=None,
callbacks=None, colsample_bylevel=None,
colsample_bynode=None,
colsample_bytree=None,
early_stopping_rounds=None,
enable_categorical=False,
eval_metric=None, feature_types=None,
gamma=None, gpu_id=None,
grow_policy=None, importance_type=None,
interaction_constraints=None,
learning_rate=0.3, max_bin=None,
max_cat_threshold=None,
max_cat_to_onehot=None,
max_delta_step=None, max_depth=3,
max_leaves=None, min_child_weight=None,
missing=nan, monotone_constraints=None,
n_estimators=100, n_jobs=None,
num_parallel_tree=None, predictor=None,
random_state=None, ...),
max_features=211, threshold=-inf), 'feature_selection__estimator__learning_rate': 0.5, 'feature_selection__estimator__max_depth': 3, 'feature_selection__estimator__n_estimators': 100, 'feature_selection__max_features': 211}"	4	0.846226	0.04108
200_SelectFromModel(estimator=XGBClassifier(base_score=None, booster=None,
callbacks=None, colsample_bylevel=None,
colsample_bynode=None,
colsample_bytree=None,
early_stopping_rounds=None,
enable_categorical=False,
eval_metric=None, feature_types=None,
gamma=None, gpu_id=None,
grow_policy=None, importance_type=None,
interaction_constraints=None,
learning_rate=0.3, max_bin=None,
max_cat_threshold=None,
max_cat_to_onehot=None,
max_delta_step=None, max_depth=3,
max_leaves=None, min_child_weight=None,
missing=nan, monotone_constraints=None,
n_estimators=100, n_jobs=None,
num_parallel_tree=None, predictor=None,
random_state=None, ...),
max_features=211, threshold=-inf)_0.1_3_100_422"	{'classify__C': 200, 'feature_selection': SelectFromModel(estimator=XGBClassifier(base_score=None, booster=None,
callbacks=None, colsample_bylevel=None,
colsample_bynode=None,
colsample_bytree=None,
early_stopping_rounds=None,
enable_categorical=False,
eval_metric=None, feature_types=None,
gamma=None, gpu_id=None,
grow_policy=None, importance_type=None,
interaction_constraints=None,
learning_rate=0.3, max_bin=None,
max_cat_threshold=None,
max_cat_to_onehot=None,
max_delta_step=None, max_depth=3,
max_leaves=None, min_child_weight=None,
missing=nan, monotone_constraints=None,
n_estimators=100, n_jobs=None,
num_parallel_tree=None, predictor=None,
random_state=None, ...),
max_features=211, threshold=-inf), 'feature_selection__estimator__learning_rate': 0.1, 'feature_selection__estimator__max_depth': 3, 'feature_selection__estimator__n_estimators': 100, 'feature_selection__max_features': 422}"	5	0.844677	0.0528328
200_SelectFromModel(estimator=XGBClassifier(base_score=None, booster=None,
callbacks=None, colsample_bylevel=None,
colsample_bynode=None,
colsample_bytree=None,
early_stopping_rounds=None,
enable_categorical=False,
eval_metric=None, feature_types=None,
gamma=None, gpu_id=None,
grow_policy=None, importance_type=None,
interaction_constraints=None,
learning_rate=0.3, max_bin=None,
max_cat_threshold=None,
max_cat_to_onehot=None,
max_delta_step=None, max_depth=3,
max_leaves=None, min_child_weight=None,
missing=nan, monotone_constraints=None,
n_estimators=100, n_jobs=None,
num_parallel_tree=None, predictor=None,
random_state=None, ...),
max_features=211, threshold=-inf)_0.5_3_250_211"	{'classify__C': 200, 'feature_selection': SelectFromModel(estimator=XGBClassifier(base_score=None, booster=None,
callbacks=None, colsample_bylevel=None,
colsample_bynode=None,
colsample_bytree=None,
early_stopping_rounds=None,
enable_categorical=False,
eval_metric=None, feature_types=None,
gamma=None, gpu_id=None,
grow_policy=None, importance_type=None,
interaction_constraints=None,
learning_rate=0.3, max_bin=None,
max_cat_threshold=None,
max_cat_to_onehot=None,
max_delta_step=None, max_depth=3,
max_leaves=None, min_child_weight=None,
missing=nan, monotone_constraints=None,
n_estimators=100, n_jobs=None,
num_parallel_tree=None, predictor=None,
random_state=None, ...),
max_features=211, threshold=-inf), 'feature_selection__estimator__learning_rate': 0.5, 'feature_selection__estimator__max_depth': 3, 'feature_selection__estimator__n_estimators': 250, 'feature_selection__max_features': 211}"	6	0.844483	0.0434548
200_SelectFromModel(estimator=XGBClassifier(base_score=None, booster=None,
callbacks=None, colsample_bylevel=None,
colsample_bynode=None,
colsample_bytree=None,
early_stopping_rounds=None,
enable_categorical=False,
eval_metric=None, feature_types=None,
gamma=None, gpu_id=None,
grow_policy=None, importance_type=None,
interaction_constraints=None,
learning_rate=0.3, max_bin=None,
max_cat_threshold=None,
max_cat_to_onehot=None,
max_delta_step=None, max_depth=3,
max_leaves=None, min_child_weight=None,
missing=nan, monotone_constraints=None,
n_estimators=100, n_jobs=None,
num_parallel_tree=None, predictor=None,
random_state=None, ...),
max_features=211, threshold=-inf)_0.3_3_100_422"	{'classify__C': 200, 'feature_selection': SelectFromModel(estimator=XGBClassifier(base_score=None, booster=None,
callbacks=None, colsample_bylevel=None,
colsample_bynode=None,
colsample_bytree=None,
early_stopping_rounds=None,
enable_categorical=False,
eval_metric=None, feature_types=None,
gamma=None, gpu_id=None,
grow_policy=None, importance_type=None,
interaction_constraints=None,
learning_rate=0.3, max_bin=None,
max_cat_threshold=None,
max_cat_to_onehot=None,
max_delta_step=None, max_depth=3,
max_leaves=None, min_child_weight=None,
missing=nan, monotone_constraints=None,
n_estimators=100, n_jobs=None,
num_parallel_tree=None, predictor=None,
random_state=None, ...),
max_features=211, threshold=-inf), 'feature_selection__estimator__learning_rate': 0.3, 'feature_selection__estimator__max_depth': 3, 'feature_selection__estimator__n_estimators': 100, 'feature_selection__max_features': 422}"	7	0.84322	0.0247628
200_SelectFromModel(estimator=XGBClassifier(base_score=None, booster=None,
callbacks=None, colsample_bylevel=None,
colsample_bynode=None,
colsample_bytree=None,
early_stopping_rounds=None,
enable_categorical=False,
eval_metric=None, feature_types=None,
gamma=None, gpu_id=None,
grow_policy=None, importance_type=None,
interaction_constraints=None,
learning_rate=0.3, max_bin=None,
max_cat_threshold=None,
max_cat_to_onehot=None,
max_delta_step=None, max_depth=3,
max_leaves=None, min_child_weight=None,
missing=nan, monotone_constraints=None,
n_estimators=100, n_jobs=None,
num_parallel_tree=None, predictor=None,
random_state=None, ...),
max_features=211, threshold=-inf)_0.1_3_100_211"	{'classify__C': 200, 'feature_selection': SelectFromModel(estimator=XGBClassifier(base_score=None, booster=None,
callbacks=None, colsample_bylevel=None,
colsample_bynode=None,
colsample_bytree=None,
early_stopping_rounds=None,
enable_categorical=False,
eval_metric=None, feature_types=None,
gamma=None, gpu_id=None,
grow_policy=None, importance_type=None,
interaction_constraints=None,
learning_rate=0.3, max_bin=None,
max_cat_threshold=None,
max_cat_to_onehot=None,
max_delta_step=None, max_depth=3,
max_leaves=None, min_child_weight=None,
missing=nan, monotone_constraints=None,
n_estimators=100, n_jobs=None,
num_parallel_tree=None, predictor=None,
random_state=None, ...),
max_features=211, threshold=-inf), 'feature_selection__estimator__learning_rate': 0.1, 'feature_selection__estimator__max_depth': 3, 'feature_selection__estimator__n_estimators': 100, 'feature_selection__max_features': 211}"	8	0.842018	0.0814473
200_SelectFromModel(estimator=XGBClassifier(base_score=None, booster=None,
callbacks=None, colsample_bylevel=None,
colsample_bynode=None,
colsample_bytree=None,
early_stopping_rounds=None,
enable_categorical=False,
eval_metric=None, feature_types=None,
gamma=None, gpu_id=None,
grow_policy=None, importance_type=None,
interaction_constraints=None,
learning_rate=0.3, max_bin=None,
max_cat_threshold=None,
max_cat_to_onehot=None,
max_delta_step=None, max_depth=3,
max_leaves=None, min_child_weight=None,
missing=nan, monotone_constraints=None,
n_estimators=100, n_jobs=None,
num_parallel_tree=None, predictor=None,
random_state=None, ...),
max_features=211, threshold=-inf)_0.3_3_250_211"	{'classify__C': 200, 'feature_selection': SelectFromModel(estimator=XGBClassifier(base_score=None, booster=None,
callbacks=None, colsample_bylevel=None,
colsample_bynode=None,
colsample_bytree=None,
early_stopping_rounds=None,
enable_categorical=False,
eval_metric=None, feature_types=None,
gamma=None, gpu_id=None,
grow_policy=None, importance_type=None,
interaction_constraints=None,
learning_rate=0.3, max_bin=None,
max_cat_threshold=None,
max_cat_to_onehot=None,
max_delta_step=None, max_depth=3,
max_leaves=None, min_child_weight=None,
missing=nan, monotone_constraints=None,
n_estimators=100, n_jobs=None,
num_parallel_tree=None, predictor=None,
random_state=None, ...),
max_features=211, threshold=-inf), 'feature_selection__estimator__learning_rate': 0.3, 'feature_selection__estimator__max_depth': 3, 'feature_selection__estimator__n_estimators': 250, 'feature_selection__max_features': 211}"	9	0.841839	0.0348783
100_SelectFromModel(estimator=XGBClassifier(base_score=None, booster=None,
callbacks=None, colsample_bylevel=None,
colsample_bynode=None,
colsample_bytree=None,
early_stopping_rounds=None,
enable_categorical=False,
eval_metric=None, feature_types=None,
gamma=None, gpu_id=None,
grow_policy=None, importance_type=None,
interaction_constraints=None,
learning_rate=0.3, max_bin=None,
max_cat_threshold=None,
max_cat_to_onehot=None,
max_delta_step=None, max_depth=3,
max_leaves=None, min_child_weight=None,
missing=nan, monotone_constraints=None,
n_estimators=100, n_jobs=None,
num_parallel_tree=None, predictor=None,
random_state=None, ...),
max_features=211, threshold=-inf)_0.3_3_100_422"	{'classify__C': 100, 'feature_selection': SelectFromModel(estimator=XGBClassifier(base_score=None, booster=None,
callbacks=None, colsample_bylevel=None,
colsample_bynode=None,
colsample_bytree=None,
early_stopping_rounds=None,
enable_categorical=False,
eval_metric=None, feature_types=None,
gamma=None, gpu_id=None,
grow_policy=None, importance_type=None,
interaction_constraints=None,
learning_rate=0.3, max_bin=None,
max_cat_threshold=None,
max_cat_to_onehot=None,
max_delta_step=None, max_depth=3,
max_leaves=None, min_child_weight=None,
missing=nan, monotone_constraints=None,
n_estimators=100, n_jobs=None,
num_parallel_tree=None, predictor=None,
random_state=None, ...),
max_features=211, threshold=-inf), 'feature_selection__estimator__learning_rate': 0.3, 'feature_selection__estimator__max_depth': 3, 'feature_selection__estimator__n_estimators': 100, 'feature_selection__max_features': 422}"	10	0.837945	0.0241941
200_SelectFromModel(estimator=XGBClassifier(base_score=None, booster=None,
callbacks=None, colsample_bylevel=None,
colsample_bynode=None,
colsample_bytree=None,
early_stopping_rounds=None,
enable_categorical=False,
eval_metric=None, feature_types=None,
gamma=None, gpu_id=None,
grow_policy=None, importance_type=None,
interaction_constraints=None,
learning_rate=0.3, max_bin=None,
max_cat_threshold=None,
max_cat_to_onehot=None,
max_delta_step=None, max_depth=3,
max_leaves=None, min_child_weight=None,
missing=nan, monotone_constraints=None,
n_estimators=100, n_jobs=None,
num_parallel_tree=None, predictor=None,
random_state=None, ...),
max_features=211, threshold=-inf)_0.5_3_500_211"	{'classify__C': 200, 'feature_selection': SelectFromModel(estimator=XGBClassifier(base_score=None, booster=None,
callbacks=None, colsample_bylevel=None,
colsample_bynode=None,
colsample_bytree=None,
early_stopping_rounds=None,
enable_categorical=False,
eval_metric=None, feature_types=None,
gamma=None, gpu_id=None,
grow_policy=None, importance_type=None,
interaction_constraints=None,
learning_rate=0.3, max_bin=None,
max_cat_threshold=None,
max_cat_to_onehot=None,
max_delta_step=None, max_depth=3,
max_leaves=None, min_child_weight=None,
missing=nan, monotone_constraints=None,
n_estimators=100, n_jobs=None,
num_parallel_tree=None, predictor=None,
random_state=None, ...),
max_features=211, threshold=-inf), 'feature_selection__estimator__learning_rate': 0.5, 'feature_selection__estimator__max_depth': 3, 'feature_selection__estimator__n_estimators': 500, 'feature_selection__max_features': 211}"	11	0.834589	0.0443121
100_SelectFromModel(estimator=XGBClassifier(base_score=None, booster=None,
callbacks=None, colsample_bylevel=None,
colsample_bynode=None,
colsample_bytree=None,
early_stopping_rounds=None,
enable_categorical=False,
eval_metric=None, feature_types=None,
gamma=None, gpu_id=None,
grow_policy=None, importance_type=None,
interaction_constraints=None,
learning_rate=0.3, max_bin=None,
max_cat_threshold=None,
max_cat_to_onehot=None,
max_delta_step=None, max_depth=3,
max_leaves=None, min_child_weight=None,
missing=nan, monotone_constraints=None,
n_estimators=100, n_jobs=None,
num_parallel_tree=None, predictor=None,
random_state=None, ...),
max_features=211, threshold=-inf)_0.5_3_250_211"	{'classify__C': 100, 'feature_selection': SelectFromModel(estimator=XGBClassifier(base_score=None, booster=None,
callbacks=None, colsample_bylevel=None,
colsample_bynode=None,
colsample_bytree=None,
early_stopping_rounds=None,
enable_categorical=False,
eval_metric=None, feature_types=None,
gamma=None, gpu_id=None,
grow_policy=None, importance_type=None,
interaction_constraints=None,
learning_rate=0.3, max_bin=None,
max_cat_threshold=None,
max_cat_to_onehot=None,
max_delta_step=None, max_depth=3,
max_leaves=None, min_child_weight=None,
missing=nan, monotone_constraints=None,
n_estimators=100, n_jobs=None,
num_parallel_tree=None, predictor=None,
random_state=None, ...),
max_features=211, threshold=-inf), 'feature_selection__estimator__learning_rate': 0.5, 'feature_selection__estimator__max_depth': 3, 'feature_selection__estimator__n_estimators': 250, 'feature_selection__max_features': 211}"	12	0.834045	0.0418963
200_SelectFromModel(estimator=XGBClassifier(base_score=None, booster=None,
callbacks=None, colsample_bylevel=None,
colsample_bynode=None,
colsample_bytree=None,
early_stopping_rounds=None,
enable_categorical=False,
eval_metric=None, feature_types=None,
gamma=None, gpu_id=None,
grow_policy=None, importance_type=None,
interaction_constraints=None,
learning_rate=0.3, max_bin=None,
max_cat_threshold=None,
max_cat_to_onehot=None,
max_delta_step=None, max_depth=3,
max_leaves=None, min_child_weight=None,
missing=nan, monotone_constraints=None,
n_estimators=100, n_jobs=None,
num_parallel_tree=None, predictor=None,
random_state=None, ...),
max_features=211, threshold=-inf)_0.5_3_100_422"	{'classify__C': 200, 'feature_selection': SelectFromModel(estimator=XGBClassifier(base_score=None, booster=None,
callbacks=None, colsample_bylevel=None,
colsample_bynode=None,
colsample_bytree=None,
early_stopping_rounds=None,
enable_categorical=False,
eval_metric=None, feature_types=None,
gamma=None, gpu_id=None,
grow_policy=None, importance_type=None,
interaction_constraints=None,
learning_rate=0.3, max_bin=None,
max_cat_threshold=None,
max_cat_to_onehot=None,
max_delta_step=None, max_depth=3,
max_leaves=None, min_child_weight=None,
missing=nan, monotone_constraints=None,
n_estimators=100, n_jobs=None,
num_parallel_tree=None, predictor=None,
random_state=None, ...),
max_features=211, threshold=-inf), 'feature_selection__estimator__learning_rate': 0.5, 'feature_selection__estimator__max_depth': 3, 'feature_selection__estimator__n_estimators': 100, 'feature_selection__max_features': 422}"	13	0.832774	0.0312045
200_SelectFromModel(estimator=XGBClassifier(base_score=None, booster=None,
callbacks=None, colsample_bylevel=None,
colsample_bynode=None,
colsample_bytree=None,
early_stopping_rounds=None,
enable_categorical=False,
eval_metric=None, feature_types=None,
gamma=None, gpu_id=None,
grow_policy=None, importance_type=None,
interaction_constraints=None,
learning_rate=0.3, max_bin=None,
max_cat_threshold=None,
max_cat_to_onehot=None,
max_delta_step=None, max_depth=3,
max_leaves=None, min_child_weight=None,
missing=nan, monotone_constraints=None,
n_estimators=100, n_jobs=None,
num_parallel_tree=None, predictor=None,
random_state=None, ...),
max_features=211, threshold=-inf)_0.3_3_500_211"	{'classify__C': 200, 'feature_selection': SelectFromModel(estimator=XGBClassifier(base_score=None, booster=None,
callbacks=None, colsample_bylevel=None,
colsample_bynode=None,
colsample_bytree=None,
early_stopping_rounds=None,
enable_categorical=False,
eval_metric=None, feature_types=None,
gamma=None, gpu_id=None,
grow_policy=None, importance_type=None,
interaction_constraints=None,
learning_rate=0.3, max_bin=None,
max_cat_threshold=None,
max_cat_to_onehot=None,
max_delta_step=None, max_depth=3,
max_leaves=None, min_child_weight=None,
missing=nan, monotone_constraints=None,
n_estimators=100, n_jobs=None,
num_parallel_tree=None, predictor=None,
random_state=None, ...),
max_features=211, threshold=-inf), 'feature_selection__estimator__learning_rate': 0.3, 'feature_selection__estimator__max_depth': 3, 'feature_selection__estimator__n_estimators': 500, 'feature_selection__max_features': 211}"	14	0.832318	0.0322688
200_SelectFromModel(estimator=XGBClassifier(base_score=None, booster=None,
callbacks=None, colsample_bylevel=None,
colsample_bynode=None,
colsample_bytree=None,
early_stopping_rounds=None,
enable_categorical=False,
eval_metric=None, feature_types=None,
gamma=None, gpu_id=None,
grow_policy=None, importance_type=None,
interaction_constraints=None,
learning_rate=0.3, max_bin=None,
max_cat_threshold=None,
max_cat_to_onehot=None,
max_delta_step=None, max_depth=3,
max_leaves=None, min_child_weight=None,
missing=nan, monotone_constraints=None,
n_estimators=100, n_jobs=None,
num_parallel_tree=None, predictor=None,
random_state=None, ...),
max_features=211, threshold=-inf)_0.5_3_250_422"	{'classify__C': 200, 'feature_selection': SelectFromModel(estimator=XGBClassifier(base_score=None, booster=None,
callbacks=None, colsample_bylevel=None,
colsample_bynode=None,
colsample_bytree=None,
early_stopping_rounds=None,
enable_categorical=False,
eval_metric=None, feature_types=None,
gamma=None, gpu_id=None,
grow_policy=None, importance_type=None,
interaction_constraints=None,
learning_rate=0.3, max_bin=None,
max_cat_threshold=None,
max_cat_to_onehot=None,
max_delta_step=None, max_depth=3,
max_leaves=None, min_child_weight=None,
missing=nan, monotone_constraints=None,
n_estimators=100, n_jobs=None,
num_parallel_tree=None, predictor=None,
random_state=None, ...),
max_features=211, threshold=-inf), 'feature_selection__estimator__learning_rate': 0.5, 'feature_selection__estimator__max_depth': 3, 'feature_selection__estimator__n_estimators': 250, 'feature_selection__max_features': 422}"	15	0.830516	0.0343891
100_SelectFromModel(estimator=XGBClassifier(base_score=None, booster=None,
callbacks=None, colsample_bylevel=None,
colsample_bynode=None,
colsample_bytree=None,
early_stopping_rounds=None,
enable_categorical=False,
eval_metric=None, feature_types=None,
gamma=None, gpu_id=None,
grow_policy=None, importance_type=None,
interaction_constraints=None,
learning_rate=0.3, max_bin=None,
max_cat_threshold=None,
max_cat_to_onehot=None,
max_delta_step=None, max_depth=3,
max_leaves=None, min_child_weight=None,
missing=nan, monotone_constraints=None,
n_estimators=100, n_jobs=None,
num_parallel_tree=None, predictor=None,
random_state=None, ...),
max_features=211, threshold=-inf)_0.5_3_100_422"	{'classify__C': 100, 'feature_selection': SelectFromModel(estimator=XGBClassifier(base_score=None, booster=None,
callbacks=None, colsample_bylevel=None,
colsample_bynode=None,
colsample_bytree=None,
early_stopping_rounds=None,
enable_categorical=False,
eval_metric=None, feature_types=None,
gamma=None, gpu_id=None,
grow_policy=None, importance_type=None,
interaction_constraints=None,
learning_rate=0.3, max_bin=None,
max_cat_threshold=None,
max_cat_to_onehot=None,
max_delta_step=None, max_depth=3,
max_leaves=None, min_child_weight=None,
missing=nan, monotone_constraints=None,
n_estimators=100, n_jobs=None,
num_parallel_tree=None, predictor=None,
random_state=None, ...),
max_features=211, threshold=-inf), 'feature_selection__estimator__learning_rate': 0.5, 'feature_selection__estimator__max_depth': 3, 'feature_selection__estimator__n_estimators': 100, 'feature_selection__max_features': 422}"	16	0.829436	0.032395
200_SelectFromModel(estimator=XGBClassifier(base_score=None, booster=None,
callbacks=None, colsample_bylevel=None,
colsample_bynode=None,
colsample_bytree=None,
early_stopping_rounds=None,
enable_categorical=False,
eval_metric=None, feature_types=None,
gamma=None, gpu_id=None,
grow_policy=None, importance_type=None,
interaction_constraints=None,
learning_rate=0.3, max_bin=None,
max_cat_threshold=None,
max_cat_to_onehot=None,
max_delta_step=None, max_depth=3,
max_leaves=None, min_child_weight=None,
missing=nan, monotone_constraints=None,
n_estimators=100, n_jobs=None,
num_parallel_tree=None, predictor=None,
random_state=None, ...),
max_features=211, threshold=-inf)_0.1_3_250_211"	{'classify__C': 200, 'feature_selection': SelectFromModel(estimator=XGBClassifier(base_score=None, booster=None,
callbacks=None, colsample_bylevel=None,
colsample_bynode=None,
colsample_bytree=None,
early_stopping_rounds=None,
enable_categorical=False,
eval_metric=None, feature_types=None,
gamma=None, gpu_id=None,
grow_policy=None, importance_type=None,
interaction_constraints=None,
learning_rate=0.3, max_bin=None,
max_cat_threshold=None,
max_cat_to_onehot=None,
max_delta_step=None, max_depth=3,
max_leaves=None, min_child_weight=None,
missing=nan, monotone_constraints=None,
n_estimators=100, n_jobs=None,
num_parallel_tree=None, predictor=None,
random_state=None, ...),
max_features=211, threshold=-inf), 'feature_selection__estimator__learning_rate': 0.1, 'feature_selection__estimator__max_depth': 3, 'feature_selection__estimator__n_estimators': 250, 'feature_selection__max_features': 211}"	17	0.829061	0.0770477
100_SelectFromModel(estimator=XGBClassifier(base_score=None, booster=None,
callbacks=None, colsample_bylevel=None,
colsample_bynode=None,
colsample_bytree=None,
early_stopping_rounds=None,
enable_categorical=False,
eval_metric=None, feature_types=None,
gamma=None, gpu_id=None,
grow_policy=None, importance_type=None,
interaction_constraints=None,
learning_rate=0.3, max_bin=None,
max_cat_threshold=None,
max_cat_to_onehot=None,
max_delta_step=None, max_depth=3,
max_leaves=None, min_child_weight=None,
missing=nan, monotone_constraints=None,
n_estimators=100, n_jobs=None,
num_parallel_tree=None, predictor=None,
random_state=None, ...),
max_features=211, threshold=-inf)_0.1_3_100_422"	{'classify__C': 100, 'feature_selection': SelectFromModel(estimator=XGBClassifier(base_score=None, booster=None,
callbacks=None, colsample_bylevel=None,
colsample_bynode=None,
colsample_bytree=None,
early_stopping_rounds=None,
enable_categorical=False,
eval_metric=None, feature_types=None,
gamma=None, gpu_id=None,
grow_policy=None, importance_type=None,
interaction_constraints=None,
learning_rate=0.3, max_bin=None,
max_cat_threshold=None,
max_cat_to_onehot=None,
max_delta_step=None, max_depth=3,
max_leaves=None, min_child_weight=None,
missing=nan, monotone_constraints=None,
n_estimators=100, n_jobs=None,
num_parallel_tree=None, predictor=None,
random_state=None, ...),
max_features=211, threshold=-inf), 'feature_selection__estimator__learning_rate': 0.1, 'feature_selection__estimator__max_depth': 3, 'feature_selection__estimator__n_estimators': 100, 'feature_selection__max_features': 422}"	18	0.827223	0.0646082
100_SelectFromModel(estimator=XGBClassifier(base_score=None, booster=None,
callbacks=None, colsample_bylevel=None,
colsample_bynode=None,
colsample_bytree=None,
early_stopping_rounds=None,
enable_categorical=False,
eval_metric=None, feature_types=None,
gamma=None, gpu_id=None,
grow_policy=None, importance_type=None,
interaction_constraints=None,
learning_rate=0.3, max_bin=None,
max_cat_threshold=None,
max_cat_to_onehot=None,
max_delta_step=None, max_depth=3,
max_leaves=None, min_child_weight=None,
missing=nan, monotone_constraints=None,
n_estimators=100, n_jobs=None,
num_parallel_tree=None, predictor=None,
random_state=None, ...),
max_features=211, threshold=-inf)_0.3_3_250_211"	{'classify__C': 100, 'feature_selection': SelectFromModel(estimator=XGBClassifier(base_score=None, booster=None,
callbacks=None, colsample_bylevel=None,
colsample_bynode=None,
colsample_bytree=None,
early_stopping_rounds=None,
enable_categorical=False,
eval_metric=None, feature_types=None,
gamma=None, gpu_id=None,
grow_policy=None, importance_type=None,
interaction_constraints=None,
learning_rate=0.3, max_bin=None,
max_cat_threshold=None,
max_cat_to_onehot=None,
max_delta_step=None, max_depth=3,
max_leaves=None, min_child_weight=None,
missing=nan, monotone_constraints=None,
n_estimators=100, n_jobs=None,
num_parallel_tree=None, predictor=None,
random_state=None, ...),
max_features=211, threshold=-inf), 'feature_selection__estimator__learning_rate': 0.3, 'feature_selection__estimator__max_depth': 3, 'feature_selection__estimator__n_estimators': 250, 'feature_selection__max_features': 211}"	19	0.826784	0.0338853
200_SelectFromModel(estimator=XGBClassifier(base_score=None, booster=None,
callbacks=None, colsample_bylevel=None,
colsample_bynode=None,
colsample_bytree=None,
early_stopping_rounds=None,
enable_categorical=False,
eval_metric=None, feature_types=None,
gamma=None, gpu_id=None,
grow_policy=None, importance_type=None,
interaction_constraints=None,
learning_rate=0.3, max_bin=None,
max_cat_threshold=None,
max_cat_to_onehot=None,
max_delta_step=None, max_depth=3,
max_leaves=None, min_child_weight=None,
missing=nan, monotone_constraints=None,
n_estimators=100, n_jobs=None,
num_parallel_tree=None, predictor=None,
random_state=None, ...),
max_features=211, threshold=-inf)_0.1_3_100_527"	{'classify__C': 200, 'feature_selection': SelectFromModel(estimator=XGBClassifier(base_score=None, booster=None,
callbacks=None, colsample_bylevel=None,
colsample_bynode=None,
colsample_bytree=None,
early_stopping_rounds=None,
enable_categorical=False,
eval_metric=None, feature_types=None,
gamma=None, gpu_id=None,
grow_policy=None, importance_type=None,
interaction_constraints=None,
learning_rate=0.3, max_bin=None,
max_cat_threshold=None,
max_cat_to_onehot=None,
max_delta_step=None, max_depth=3,
max_leaves=None, min_child_weight=None,
missing=nan, monotone_constraints=None,
n_estimators=100, n_jobs=None,
num_parallel_tree=None, predictor=None,
random_state=None, ...),
max_features=211, threshold=-inf), 'feature_selection__estimator__learning_rate': 0.1, 'feature_selection__estimator__max_depth': 3, 'feature_selection__estimator__n_estimators': 100, 'feature_selection__max_features': 527}"	20	0.825991	0.0427388
100_SelectFromModel(estimator=XGBClassifier(base_score=None, booster=None,
callbacks=None, colsample_bylevel=None,
colsample_bynode=None,
colsample_bytree=None,
early_stopping_rounds=None,
enable_categorical=False,
eval_metric=None, feature_types=None,
gamma=None, gpu_id=None,
grow_policy=None, importance_type=None,
interaction_constraints=None,
learning_rate=0.3, max_bin=None,
max_cat_threshold=None,
max_cat_to_onehot=None,
max_delta_step=None, max_depth=3,
max_leaves=None, min_child_weight=None,
missing=nan, monotone_constraints=None,
n_estimators=100, n_jobs=None,
num_parallel_tree=None, predictor=None,
random_state=None, ...),
max_features=211, threshold=-inf)_0.5_3_500_211"	{'classify__C': 100, 'feature_selection': SelectFromModel(estimator=XGBClassifier(base_score=None, booster=None,
callbacks=None, colsample_bylevel=None,
colsample_bynode=None,
colsample_bytree=None,
early_stopping_rounds=None,
enable_categorical=False,
eval_metric=None, feature_types=None,
gamma=None, gpu_id=None,
grow_policy=None, importance_type=None,
interaction_constraints=None,
learning_rate=0.3, max_bin=None,
max_cat_threshold=None,
max_cat_to_onehot=None,
max_delta_step=None, max_depth=3,
max_leaves=None, min_child_weight=None,
missing=nan, monotone_constraints=None,
n_estimators=100, n_jobs=None,
num_parallel_tree=None, predictor=None,
random_state=None, ...),
max_features=211, threshold=-inf), 'feature_selection__estimator__learning_rate': 0.5, 'feature_selection__estimator__max_depth': 3, 'feature_selection__estimator__n_estimators': 500, 'feature_selection__max_features': 211}"	21	0.823867	0.0415144
200_SelectFromModel(estimator=XGBClassifier(base_score=None, booster=None,
callbacks=None, colsample_bylevel=None,
colsample_bynode=None,
colsample_bytree=None,
early_stopping_rounds=None,
enable_categorical=False,
eval_metric=None, feature_types=None,
gamma=None, gpu_id=None,
grow_policy=None, importance_type=None,
interaction_constraints=None,
learning_rate=0.3, max_bin=None,
max_cat_threshold=None,
max_cat_to_onehot=None,
max_delta_step=None, max_depth=3,
max_leaves=None, min_child_weight=None,
missing=nan, monotone_constraints=None,
n_estimators=100, n_jobs=None,
num_parallel_tree=None, predictor=None,
random_state=None, ...),
max_features=211, threshold=-inf)_0.3_3_100_527"	{'classify__C': 200, 'feature_selection': SelectFromModel(estimator=XGBClassifier(base_score=None, booster=None,
callbacks=None, colsample_bylevel=None,
colsample_bynode=None,
colsample_bytree=None,
early_stopping_rounds=None,
enable_categorical=False,
eval_metric=None, feature_types=None,
gamma=None, gpu_id=None,
grow_policy=None, importance_type=None,
interaction_constraints=None,
learning_rate=0.3, max_bin=None,
max_cat_threshold=None,
max_cat_to_onehot=None,
max_delta_step=None, max_depth=3,
max_leaves=None, min_child_weight=None,
missing=nan, monotone_constraints=None,
n_estimators=100, n_jobs=None,
num_parallel_tree=None, predictor=None,
random_state=None, ...),
max_features=211, threshold=-inf), 'feature_selection__estimator__learning_rate': 0.3, 'feature_selection__estimator__max_depth': 3, 'feature_selection__estimator__n_estimators': 100, 'feature_selection__max_features': 527}"	22	0.823438	0.033008
200_SelectFromModel(estimator=XGBClassifier(base_score=None, booster=None,
callbacks=None, colsample_bylevel=None,
colsample_bynode=None,
colsample_bytree=None,
early_stopping_rounds=None,
enable_categorical=False,
eval_metric=None, feature_types=None,
gamma=None, gpu_id=None,
grow_policy=None, importance_type=None,
interaction_constraints=None,
learning_rate=0.3, max_bin=None,
max_cat_threshold=None,
max_cat_to_onehot=None,
max_delta_step=None, max_depth=3,
max_leaves=None, min_child_weight=None,
missing=nan, monotone_constraints=None,
n_estimators=100, n_jobs=None,
num_parallel_tree=None, predictor=None,
random_state=None, ...),
max_features=211, threshold=-inf)_0.5_3_100_527"	{'classify__C': 200, 'feature_selection': SelectFromModel(estimator=XGBClassifier(base_score=None, booster=None,
callbacks=None, colsample_bylevel=None,
colsample_bynode=None,
colsample_bytree=None,
early_stopping_rounds=None,
enable_categorical=False,
eval_metric=None, feature_types=None,
gamma=None, gpu_id=None,
grow_policy=None, importance_type=None,
interaction_constraints=None,
learning_rate=0.3, max_bin=None,
max_cat_threshold=None,
max_cat_to_onehot=None,
max_delta_step=None, max_depth=3,
max_leaves=None, min_child_weight=None,
missing=nan, monotone_constraints=None,
n_estimators=100, n_jobs=None,
num_parallel_tree=None, predictor=None,
random_state=None, ...),
max_features=211, threshold=-inf), 'feature_selection__estimator__learning_rate': 0.5, 'feature_selection__estimator__max_depth': 3, 'feature_selection__estimator__n_estimators': 100, 'feature_selection__max_features': 527}"	23	0.823333	0.0334118
100_SelectFromModel(estimator=XGBClassifier(base_score=None, booster=None,
callbacks=None, colsample_bylevel=None,
colsample_bynode=None,
colsample_bytree=None,
early_stopping_rounds=None,
enable_categorical=False,
eval_metric=None, feature_types=None,
gamma=None, gpu_id=None,
grow_policy=None, importance_type=None,
interaction_constraints=None,
learning_rate=0.3, max_bin=None,
max_cat_threshold=None,
max_cat_to_onehot=None,
max_delta_step=None, max_depth=3,
max_leaves=None, min_child_weight=None,
missing=nan, monotone_constraints=None,
n_estimators=100, n_jobs=None,
num_parallel_tree=None, predictor=None,
random_state=None, ...),
max_features=211, threshold=-inf)_0.1_3_100_211"	{'classify__C': 100, 'feature_selection': SelectFromModel(estimator=XGBClassifier(base_score=None, booster=None,
callbacks=None, colsample_bylevel=None,
colsample_bynode=None,
colsample_bytree=None,
early_stopping_rounds=None,
enable_categorical=False,
eval_metric=None, feature_types=None,
gamma=None, gpu_id=None,
grow_policy=None, importance_type=None,
interaction_constraints=None,
learning_rate=0.3, max_bin=None,
max_cat_threshold=None,
max_cat_to_onehot=None,
max_delta_step=None, max_depth=3,
max_leaves=None, min_child_weight=None,
missing=nan, monotone_constraints=None,
n_estimators=100, n_jobs=None,
num_parallel_tree=None, predictor=None,
random_state=None, ...),
max_features=211, threshold=-inf), 'feature_selection__estimator__learning_rate': 0.1, 'feature_selection__estimator__max_depth': 3, 'feature_selection__estimator__n_estimators': 100, 'feature_selection__max_features': 211}"	24	0.822025	0.10192
200_SelectFromModel(estimator=XGBClassifier(base_score=None, booster=None,
callbacks=None, colsample_bylevel=None,
colsample_bynode=None,
colsample_bytree=None,
early_stopping_rounds=None,
enable_categorical=False,
eval_metric=None, feature_types=None,
gamma=None, gpu_id=None,
grow_policy=None, importance_type=None,
interaction_constraints=None,
learning_rate=0.3, max_bin=None,
max_cat_threshold=None,
max_cat_to_onehot=None,
max_delta_step=None, max_depth=3,
max_leaves=None, min_child_weight=None,
missing=nan, monotone_constraints=None,
n_estimators=100, n_jobs=None,
num_parallel_tree=None, predictor=None,
random_state=None, ...),
max_features=211, threshold=-inf)_0.5_3_500_422"	{'classify__C': 200, 'feature_selection': SelectFromModel(estimator=XGBClassifier(base_score=None, booster=None,
callbacks=None, colsample_bylevel=None,
colsample_bynode=None,
colsample_bytree=None,
early_stopping_rounds=None,
enable_categorical=False,
eval_metric=None, feature_types=None,
gamma=None, gpu_id=None,
grow_policy=None, importance_type=None,
interaction_constraints=None,
learning_rate=0.3, max_bin=None,
max_cat_threshold=None,
max_cat_to_onehot=None,
max_delta_step=None, max_depth=3,
max_leaves=None, min_child_weight=None,
missing=nan, monotone_constraints=None,
n_estimators=100, n_jobs=None,
num_parallel_tree=None, predictor=None,
random_state=None, ...),
max_features=211, threshold=-inf), 'feature_selection__estimator__learning_rate': 0.5, 'feature_selection__estimator__max_depth': 3, 'feature_selection__estimator__n_estimators': 500, 'feature_selection__max_features': 422}"	25	0.821964	0.0360214
100_SelectFromModel(estimator=XGBClassifier(base_score=None, booster=None,
callbacks=None, colsample_bylevel=None,
colsample_bynode=None,
colsample_bytree=None,
early_stopping_rounds=None,
enable_categorical=False,
eval_metric=None, feature_types=None,
gamma=None, gpu_id=None,
grow_policy=None, importance_type=None,
interaction_constraints=None,
learning_rate=0.3, max_bin=None,
max_cat_threshold=None,
max_cat_to_onehot=None,
max_delta_step=None, max_depth=3,
max_leaves=None, min_child_weight=None,
missing=nan, monotone_constraints=None,
n_estimators=100, n_jobs=None,
num_parallel_tree=None, predictor=None,
random_state=None, ...),
max_features=211, threshold=-inf)_0.5_3_250_422"	{'classify__C': 100, 'feature_selection': SelectFromModel(estimator=XGBClassifier(base_score=None, booster=None,
callbacks=None, colsample_bylevel=None,
colsample_bynode=None,
colsample_bytree=None,
early_stopping_rounds=None,
enable_categorical=False,
eval_metric=None, feature_types=None,
gamma=None, gpu_id=None,
grow_policy=None, importance_type=None,
interaction_constraints=None,
learning_rate=0.3, max_bin=None,
max_cat_threshold=None,
max_cat_to_onehot=None,
max_delta_step=None, max_depth=3,
max_leaves=None, min_child_weight=None,
missing=nan, monotone_constraints=None,
n_estimators=100, n_jobs=None,
num_parallel_tree=None, predictor=None,
random_state=None, ...),
max_features=211, threshold=-inf), 'feature_selection__estimator__learning_rate': 0.5, 'feature_selection__estimator__max_depth': 3, 'feature_selection__estimator__n_estimators': 250, 'feature_selection__max_features': 422}"	26	0.8215	0.034808
100_SelectFromModel(estimator=XGBClassifier(base_score=None, booster=None,
callbacks=None, colsample_bylevel=None,
colsample_bynode=None,
colsample_bytree=None,
early_stopping_rounds=None,
enable_categorical=False,
eval_metric=None, feature_types=None,
gamma=None, gpu_id=None,
grow_policy=None, importance_type=None,
interaction_constraints=None,
learning_rate=0.3, max_bin=None,
max_cat_threshold=None,
max_cat_to_onehot=None,
max_delta_step=None, max_depth=3,
max_leaves=None, min_child_weight=None,
missing=nan, monotone_constraints=None,
n_estimators=100, n_jobs=None,
num_parallel_tree=None, predictor=None,
random_state=None, ...),
max_features=211, threshold=-inf)_0.3_3_100_527"	{'classify__C': 100, 'feature_selection': SelectFromModel(estimator=XGBClassifier(base_score=None, booster=None,
callbacks=None, colsample_bylevel=None,
colsample_bynode=None,
colsample_bytree=None,
early_stopping_rounds=None,
enable_categorical=False,
eval_metric=None, feature_types=None,
gamma=None, gpu_id=None,
grow_policy=None, importance_type=None,
interaction_constraints=None,
learning_rate=0.3, max_bin=None,
max_cat_threshold=None,
max_cat_to_onehot=None,
max_delta_step=None, max_depth=3,
max_leaves=None, min_child_weight=None,
missing=nan, monotone_constraints=None,
n_estimators=100, n_jobs=None,
num_parallel_tree=None, predictor=None,
random_state=None, ...),
max_features=211, threshold=-inf), 'feature_selection__estimator__learning_rate': 0.3, 'feature_selection__estimator__max_depth': 3, 'feature_selection__estimator__n_estimators': 100, 'feature_selection__max_features': 527}"	27	0.820334	0.0353745
100_SelectFromModel(estimator=XGBClassifier(base_score=None, booster=None,
callbacks=None, colsample_bylevel=None,
colsample_bynode=None,
colsample_bytree=None,
early_stopping_rounds=None,
enable_categorical=False,
eval_metric=None, feature_types=None,
gamma=None, gpu_id=None,
grow_policy=None, importance_type=None,
interaction_constraints=None,
learning_rate=0.3, max_bin=None,
max_cat_threshold=None,
max_cat_to_onehot=None,
max_delta_step=None, max_depth=3,
max_leaves=None, min_child_weight=None,
missing=nan, monotone_constraints=None,
n_estimators=100, n_jobs=None,
num_parallel_tree=None, predictor=None,
random_state=None, ...),
max_features=211, threshold=-inf)_0.5_3_100_527"	{'classify__C': 100, 'feature_selection': SelectFromModel(estimator=XGBClassifier(base_score=None, booster=None,
callbacks=None, colsample_bylevel=None,
colsample_bynode=None,
colsample_bytree=None,
early_stopping_rounds=None,
enable_categorical=False,
eval_metric=None, feature_types=None,
gamma=None, gpu_id=None,
grow_policy=None, importance_type=None,
interaction_constraints=None,
learning_rate=0.3, max_bin=None,
max_cat_threshold=None,
max_cat_to_onehot=None,
max_delta_step=None, max_depth=3,
max_leaves=None, min_child_weight=None,
missing=nan, monotone_constraints=None,
n_estimators=100, n_jobs=None,
num_parallel_tree=None, predictor=None,
random_state=None, ...),
max_features=211, threshold=-inf), 'feature_selection__estimator__learning_rate': 0.5, 'feature_selection__estimator__max_depth': 3, 'feature_selection__estimator__n_estimators': 100, 'feature_selection__max_features': 527}"	28	0.820126	0.0318194
200_SelectFromModel(estimator=XGBClassifier(base_score=None, booster=None,
callbacks=None, colsample_bylevel=None,
colsample_bynode=None,
colsample_bytree=None,
early_stopping_rounds=None,
enable_categorical=False,
eval_metric=None, feature_types=None,
gamma=None, gpu_id=None,
grow_policy=None, importance_type=None,
interaction_constraints=None,
learning_rate=0.3, max_bin=None,
max_cat_threshold=None,
max_cat_to_onehot=None,
max_delta_step=None, max_depth=3,
max_leaves=None, min_child_weight=None,
missing=nan, monotone_constraints=None,
n_estimators=100, n_jobs=None,
num_parallel_tree=None, predictor=None,
random_state=None, ...),
max_features=211, threshold=-inf)_0.5_5_100_211"	{'classify__C': 200, 'feature_selection': SelectFromModel(estimator=XGBClassifier(base_score=None, booster=None,
callbacks=None, colsample_bylevel=None,
colsample_bynode=None,
colsample_bytree=None,
early_stopping_rounds=None,
enable_categorical=False,
eval_metric=None, feature_types=None,
gamma=None, gpu_id=None,
grow_policy=None, importance_type=None,
interaction_constraints=None,
learning_rate=0.3, max_bin=None,
max_cat_threshold=None,
max_cat_to_onehot=None,
max_delta_step=None, max_depth=3,
max_leaves=None, min_child_weight=None,
missing=nan, monotone_constraints=None,
n_estimators=100, n_jobs=None,
num_parallel_tree=None, predictor=None,
random_state=None, ...),
max_features=211, threshold=-inf), 'feature_selection__estimator__learning_rate': 0.5, 'feature_selection__estimator__max_depth': 5, 'feature_selection__estimator__n_estimators': 100, 'feature_selection__max_features': 211}"	29	0.819636	0.0348405
100_SelectFromModel(estimator=XGBClassifier(base_score=None, booster=None,
callbacks=None, colsample_bylevel=None,
colsample_bynode=None,
colsample_bytree=None,
early_stopping_rounds=None,
enable_categorical=False,
eval_metric=None, feature_types=None,
gamma=None, gpu_id=None,
grow_policy=None, importance_type=None,
interaction_constraints=None,
learning_rate=0.3, max_bin=None,
max_cat_threshold=None,
max_cat_to_onehot=None,
max_delta_step=None, max_depth=3,
max_leaves=None, min_child_weight=None,
missing=nan, monotone_constraints=None,
n_estimators=100, n_jobs=None,
num_parallel_tree=None, predictor=None,
random_state=None, ...),
max_features=211, threshold=-inf)_0.1_3_100_527"	{'classify__C': 100, 'feature_selection': SelectFromModel(estimator=XGBClassifier(base_score=None, booster=None,
callbacks=None, colsample_bylevel=None,
colsample_bynode=None,
colsample_bytree=None,
early_stopping_rounds=None,
enable_categorical=False,
eval_metric=None, feature_types=None,
gamma=None, gpu_id=None,
grow_policy=None, importance_type=None,
interaction_constraints=None,
learning_rate=0.3, max_bin=None,
max_cat_threshold=None,
max_cat_to_onehot=None,
max_delta_step=None, max_depth=3,
max_leaves=None, min_child_weight=None,
missing=nan, monotone_constraints=None,
n_estimators=100, n_jobs=None,
num_parallel_tree=None, predictor=None,
random_state=None, ...),
max_features=211, threshold=-inf), 'feature_selection__estimator__learning_rate': 0.1, 'feature_selection__estimator__max_depth': 3, 'feature_selection__estimator__n_estimators': 100, 'feature_selection__max_features': 527}"	30	0.817857	0.0511943
100_SelectFromModel(estimator=XGBClassifier(base_score=None, booster=None,
callbacks=None, colsample_bylevel=None,
colsample_bynode=None,
colsample_bytree=None,
early_stopping_rounds=None,
enable_categorical=False,
eval_metric=None, feature_types=None,
gamma=None, gpu_id=None,
grow_policy=None, importance_type=None,
interaction_constraints=None,
learning_rate=0.3, max_bin=None,
max_cat_threshold=None,
max_cat_to_onehot=None,
max_delta_step=None, max_depth=3,
max_leaves=None, min_child_weight=None,
missing=nan, monotone_constraints=None,
n_estimators=100, n_jobs=None,
num_parallel_tree=None, predictor=None,
random_state=None, ...),
max_features=211, threshold=-inf)_0.3_3_500_211"	{'classify__C': 100, 'feature_selection': SelectFromModel(estimator=XGBClassifier(base_score=None, booster=None,
callbacks=None, colsample_bylevel=None,
colsample_bynode=None,
colsample_bytree=None,
early_stopping_rounds=None,
enable_categorical=False,
eval_metric=None, feature_types=None,
gamma=None, gpu_id=None,
grow_policy=None, importance_type=None,
interaction_constraints=None,
learning_rate=0.3, max_bin=None,
max_cat_threshold=None,
max_cat_to_onehot=None,
max_delta_step=None, max_depth=3,
max_leaves=None, min_child_weight=None,
missing=nan, monotone_constraints=None,
n_estimators=100, n_jobs=None,
num_parallel_tree=None, predictor=None,
random_state=None, ...),
max_features=211, threshold=-inf), 'feature_selection__estimator__learning_rate': 0.3, 'feature_selection__estimator__max_depth': 3, 'feature_selection__estimator__n_estimators': 500, 'feature_selection__max_features': 211}"	31	0.815915	0.0314934
200_SelectFromModel(estimator=XGBClassifier(base_score=None, booster=None,
callbacks=None, colsample_bylevel=None,
colsample_bynode=None,
colsample_bytree=None,
early_stopping_rounds=None,
enable_categorical=False,
eval_metric=None, feature_types=None,
gamma=None, gpu_id=None,
grow_policy=None, importance_type=None,
interaction_constraints=None,
learning_rate=0.3, max_bin=None,
max_cat_threshold=None,
max_cat_to_onehot=None,
max_delta_step=None, max_depth=3,
max_leaves=None, min_child_weight=None,
missing=nan, monotone_constraints=None,
n_estimators=100, n_jobs=None,
num_parallel_tree=None, predictor=None,
random_state=None, ...),
max_features=211, threshold=-inf)_0.5_3_250_527"	{'classify__C': 200, 'feature_selection': SelectFromModel(estimator=XGBClassifier(base_score=None, booster=None,
callbacks=None, colsample_bylevel=None,
colsample_bynode=None,
colsample_bytree=None,
early_stopping_rounds=None,
enable_categorical=False,
eval_metric=None, feature_types=None,
gamma=None, gpu_id=None,
grow_policy=None, importance_type=None,
interaction_constraints=None,
learning_rate=0.3, max_bin=None,
max_cat_threshold=None,
max_cat_to_onehot=None,
max_delta_step=None, max_depth=3,
max_leaves=None, min_child_weight=None,
missing=nan, monotone_constraints=None,
n_estimators=100, n_jobs=None,
num_parallel_tree=None, predictor=None,
random_state=None, ...),
max_features=211, threshold=-inf), 'feature_selection__estimator__learning_rate': 0.5, 'feature_selection__estimator__max_depth': 3, 'feature_selection__estimator__n_estimators': 250, 'feature_selection__max_features': 527}"	32	0.814123	0.0339761
100_SelectFromModel(estimator=XGBClassifier(base_score=None, booster=None,
callbacks=None, colsample_bylevel=None,
colsample_bynode=None,
colsample_bytree=None,
early_stopping_rounds=None,
enable_categorical=False,
eval_metric=None, feature_types=None,
gamma=None, gpu_id=None,
grow_policy=None, importance_type=None,
interaction_constraints=None,
learning_rate=0.3, max_bin=None,
max_cat_threshold=None,
max_cat_to_onehot=None,
max_delta_step=None, max_depth=3,
max_leaves=None, min_child_weight=None,
missing=nan, monotone_constraints=None,
n_estimators=100, n_jobs=None,
num_parallel_tree=None, predictor=None,
random_state=None, ...),
max_features=211, threshold=-inf)_0.5_3_500_422"	{'classify__C': 100, 'feature_selection': SelectFromModel(estimator=XGBClassifier(base_score=None, booster=None,
callbacks=None, colsample_bylevel=None,
colsample_bynode=None,
colsample_bytree=None,
early_stopping_rounds=None,
enable_categorical=False,
eval_metric=None, feature_types=None,
gamma=None, gpu_id=None,
grow_policy=None, importance_type=None,
interaction_constraints=None,
learning_rate=0.3, max_bin=None,
max_cat_threshold=None,
max_cat_to_onehot=None,
max_delta_step=None, max_depth=3,
max_leaves=None, min_child_weight=None,
missing=nan, monotone_constraints=None,
n_estimators=100, n_jobs=None,
num_parallel_tree=None, predictor=None,
random_state=None, ...),
max_features=211, threshold=-inf), 'feature_selection__estimator__learning_rate': 0.5, 'feature_selection__estimator__max_depth': 3, 'feature_selection__estimator__n_estimators': 500, 'feature_selection__max_features': 422}"	33	0.813492	0.0352694
200_SelectFromModel(estimator=XGBClassifier(base_score=None, booster=None,
callbacks=None, colsample_bylevel=None,
colsample_bynode=None,
colsample_bytree=None,
early_stopping_rounds=None,
enable_categorical=False,
eval_metric=None, feature_types=None,
gamma=None, gpu_id=None,
grow_policy=None, importance_type=None,
interaction_constraints=None,
learning_rate=0.3, max_bin=None,
max_cat_threshold=None,
max_cat_to_onehot=None,
max_delta_step=None, max_depth=3,
max_leaves=None, min_child_weight=None,
missing=nan, monotone_constraints=None,
n_estimators=100, n_jobs=None,
num_parallel_tree=None, predictor=None,
random_state=None, ...),
max_features=211, threshold=-inf)_0.5_5_250_211"	{'classify__C': 200, 'feature_selection': SelectFromModel(estimator=XGBClassifier(base_score=None, booster=None,
callbacks=None, colsample_bylevel=None,
colsample_bynode=None,
colsample_bytree=None,
early_stopping_rounds=None,
enable_categorical=False,
eval_metric=None, feature_types=None,
gamma=None, gpu_id=None,
grow_policy=None, importance_type=None,
interaction_constraints=None,
learning_rate=0.3, max_bin=None,
max_cat_threshold=None,
max_cat_to_onehot=None,
max_delta_step=None, max_depth=3,
max_leaves=None, min_child_weight=None,
missing=nan, monotone_constraints=None,
n_estimators=100, n_jobs=None,
num_parallel_tree=None, predictor=None,
random_state=None, ...),
max_features=211, threshold=-inf), 'feature_selection__estimator__learning_rate': 0.5, 'feature_selection__estimator__max_depth': 5, 'feature_selection__estimator__n_estimators': 250, 'feature_selection__max_features': 211}"	34	0.813459	0.0359955
200_SelectFromModel(estimator=XGBClassifier(base_score=None, booster=None,
callbacks=None, colsample_bylevel=None,
colsample_bynode=None,
colsample_bytree=None,
early_stopping_rounds=None,
enable_categorical=False,
eval_metric=None, feature_types=None,
gamma=None, gpu_id=None,
grow_policy=None, importance_type=None,
interaction_constraints=None,
learning_rate=0.3, max_bin=None,
max_cat_threshold=None,
max_cat_to_onehot=None,
max_delta_step=None, max_depth=3,
max_leaves=None, min_child_weight=None,
missing=nan, monotone_constraints=None,
n_estimators=100, n_jobs=None,
num_parallel_tree=None, predictor=None,
random_state=None, ...),
max_features=211, threshold=-inf)_0.1_3_250_422"	{'classify__C': 200, 'feature_selection': SelectFromModel(estimator=XGBClassifier(base_score=None, booster=None,
callbacks=None, colsample_bylevel=None,
colsample_bynode=None,
colsample_bytree=None,
early_stopping_rounds=None,
enable_categorical=False,
eval_metric=None, feature_types=None,
gamma=None, gpu_id=None,
grow_policy=None, importance_type=None,
interaction_constraints=None,
learning_rate=0.3, max_bin=None,
max_cat_threshold=None,
max_cat_to_onehot=None,
max_delta_step=None, max_depth=3,
max_leaves=None, min_child_weight=None,
missing=nan, monotone_constraints=None,
n_estimators=100, n_jobs=None,
num_parallel_tree=None, predictor=None,
random_state=None, ...),
max_features=211, threshold=-inf), 'feature_selection__estimator__learning_rate': 0.1, 'feature_selection__estimator__max_depth': 3, 'feature_selection__estimator__n_estimators': 250, 'feature_selection__max_features': 422}"	35	0.812687	0.0412555
100_SelectFromModel(estimator=XGBClassifier(base_score=None, booster=None,
callbacks=None, colsample_bylevel=None,
colsample_bynode=None,
colsample_bytree=None,
early_stopping_rounds=None,
enable_categorical=False,
eval_metric=None, feature_types=None,
gamma=None, gpu_id=None,
grow_policy=None, importance_type=None,
interaction_constraints=None,
learning_rate=0.3, max_bin=None,
max_cat_threshold=None,
max_cat_to_onehot=None,
max_delta_step=None, max_depth=3,
max_leaves=None, min_child_weight=None,
missing=nan, monotone_constraints=None,
n_estimators=100, n_jobs=None,
num_parallel_tree=None, predictor=None,
random_state=None, ...),
max_features=211, threshold=-inf)_0.5_5_100_211"	{'classify__C': 100, 'feature_selection': SelectFromModel(estimator=XGBClassifier(base_score=None, booster=None,
callbacks=None, colsample_bylevel=None,
colsample_bynode=None,
colsample_bytree=None,
early_stopping_rounds=None,
enable_categorical=False,
eval_metric=None, feature_types=None,
gamma=None, gpu_id=None,
grow_policy=None, importance_type=None,
interaction_constraints=None,
learning_rate=0.3, max_bin=None,
max_cat_threshold=None,
max_cat_to_onehot=None,
max_delta_step=None, max_depth=3,
max_leaves=None, min_child_weight=None,
missing=nan, monotone_constraints=None,
n_estimators=100, n_jobs=None,
num_parallel_tree=None, predictor=None,
random_state=None, ...),
max_features=211, threshold=-inf), 'feature_selection__estimator__learning_rate': 0.5, 'feature_selection__estimator__max_depth': 5, 'feature_selection__estimator__n_estimators': 100, 'feature_selection__max_features': 211}"	36	0.811661	0.0335867
200_SelectFromModel(estimator=XGBClassifier(base_score=None, booster=None,
callbacks=None, colsample_bylevel=None,
colsample_bynode=None,
colsample_bytree=None,
early_stopping_rounds=None,
enable_categorical=False,
eval_metric=None, feature_types=None,
gamma=None, gpu_id=None,
grow_policy=None, importance_type=None,
interaction_constraints=None,
learning_rate=0.3, max_bin=None,
max_cat_threshold=None,
max_cat_to_onehot=None,
max_delta_step=None, max_depth=3,
max_leaves=None, min_child_weight=None,
missing=nan, monotone_constraints=None,
n_estimators=100, n_jobs=None,
num_parallel_tree=None, predictor=None,
random_state=None, ...),
max_features=211, threshold=-inf)_0.3_3_250_422"	{'classify__C': 200, 'feature_selection': SelectFromModel(estimator=XGBClassifier(base_score=None, booster=None,
callbacks=None, colsample_bylevel=None,
colsample_bynode=None,
colsample_bytree=None,
early_stopping_rounds=None,
enable_categorical=False,
eval_metric=None, feature_types=None,
gamma=None, gpu_id=None,
grow_policy=None, importance_type=None,
interaction_constraints=None,
learning_rate=0.3, max_bin=None,
max_cat_threshold=None,
max_cat_to_onehot=None,
max_delta_step=None, max_depth=3,
max_leaves=None, min_child_weight=None,
missing=nan, monotone_constraints=None,
n_estimators=100, n_jobs=None,
num_parallel_tree=None, predictor=None,
random_state=None, ...),
max_features=211, threshold=-inf), 'feature_selection__estimator__learning_rate': 0.3, 'feature_selection__estimator__max_depth': 3, 'feature_selection__estimator__n_estimators': 250, 'feature_selection__max_features': 422}"	37	0.810233	0.0334789
200_SelectFromModel(estimator=XGBClassifier(base_score=None, booster=None,
callbacks=None, colsample_bylevel=None,
colsample_bynode=None,
colsample_bytree=None,
early_stopping_rounds=None,
enable_categorical=False,
eval_metric=None, feature_types=None,
gamma=None, gpu_id=None,
grow_policy=None, importance_type=None,
interaction_constraints=None,
learning_rate=0.3, max_bin=None,
max_cat_threshold=None,
max_cat_to_onehot=None,
max_delta_step=None, max_depth=3,
max_leaves=None, min_child_weight=None,
missing=nan, monotone_constraints=None,
n_estimators=100, n_jobs=None,
num_parallel_tree=None, predictor=None,
random_state=None, ...),
max_features=211, threshold=-inf)_0.5_3_500_527"	{'classify__C': 200, 'feature_selection': SelectFromModel(estimator=XGBClassifier(base_score=None, booster=None,
callbacks=None, colsample_bylevel=None,
colsample_bynode=None,
colsample_bytree=None,
early_stopping_rounds=None,
enable_categorical=False,
eval_metric=None, feature_types=None,
gamma=None, gpu_id=None,
grow_policy=None, importance_type=None,
interaction_constraints=None,
learning_rate=0.3, max_bin=None,
max_cat_threshold=None,
max_cat_to_onehot=None,
max_delta_step=None, max_depth=3,
max_leaves=None, min_child_weight=None,
missing=nan, monotone_constraints=None,
n_estimators=100, n_jobs=None,
num_parallel_tree=None, predictor=None,
random_state=None, ...),
max_features=211, threshold=-inf), 'feature_selection__estimator__learning_rate': 0.5, 'feature_selection__estimator__max_depth': 3, 'feature_selection__estimator__n_estimators': 500, 'feature_selection__max_features': 527}"	38	0.808679	0.0333979
100_SelectFromModel(estimator=XGBClassifier(base_score=None, booster=None,
callbacks=None, colsample_bylevel=None,
colsample_bynode=None,
colsample_bytree=None,
early_stopping_rounds=None,
enable_categorical=False,
eval_metric=None, feature_types=None,
gamma=None, gpu_id=None,
grow_policy=None, importance_type=None,
interaction_constraints=None,
learning_rate=0.3, max_bin=None,
max_cat_threshold=None,
max_cat_to_onehot=None,
max_delta_step=None, max_depth=3,
max_leaves=None, min_child_weight=None,
missing=nan, monotone_constraints=None,
n_estimators=100, n_jobs=None,
num_parallel_tree=None, predictor=None,
random_state=None, ...),
max_features=211, threshold=-inf)_0.5_3_250_527"	{'classify__C': 100, 'feature_selection': SelectFromModel(estimator=XGBClassifier(base_score=None, booster=None,
callbacks=None, colsample_bylevel=None,
colsample_bynode=None,
colsample_bytree=None,
early_stopping_rounds=None,
enable_categorical=False,
eval_metric=None, feature_types=None,
gamma=None, gpu_id=None,
grow_policy=None, importance_type=None,
interaction_constraints=None,
learning_rate=0.3, max_bin=None,
max_cat_threshold=None,
max_cat_to_onehot=None,
max_delta_step=None, max_depth=3,
max_leaves=None, min_child_weight=None,
missing=nan, monotone_constraints=None,
n_estimators=100, n_jobs=None,
num_parallel_tree=None, predictor=None,
random_state=None, ...),
max_features=211, threshold=-inf), 'feature_selection__estimator__learning_rate': 0.5, 'feature_selection__estimator__max_depth': 3, 'feature_selection__estimator__n_estimators': 250, 'feature_selection__max_features': 527}"	39	0.807678	0.0314887
100_SelectFromModel(estimator=XGBClassifier(base_score=None, booster=None,
callbacks=None, colsample_bylevel=None,
colsample_bynode=None,
colsample_bytree=None,
early_stopping_rounds=None,
enable_categorical=False,
eval_metric=None, feature_types=None,
gamma=None, gpu_id=None,
grow_policy=None, importance_type=None,
interaction_constraints=None,
learning_rate=0.3, max_bin=None,
max_cat_threshold=None,
max_cat_to_onehot=None,
max_delta_step=None, max_depth=3,
max_leaves=None, min_child_weight=None,
missing=nan, monotone_constraints=None,
n_estimators=100, n_jobs=None,
num_parallel_tree=None, predictor=None,
random_state=None, ...),
max_features=211, threshold=-inf)_0.5_3_500_527"	{'classify__C': 100, 'feature_selection': SelectFromModel(estimator=XGBClassifier(base_score=None, booster=None,
callbacks=None, colsample_bylevel=None,
colsample_bynode=None,
colsample_bytree=None,
early_stopping_rounds=None,
enable_categorical=False,
eval_metric=None, feature_types=None,
gamma=None, gpu_id=None,
grow_policy=None, importance_type=None,
interaction_constraints=None,
learning_rate=0.3, max_bin=None,
max_cat_threshold=None,
max_cat_to_onehot=None,
max_delta_step=None, max_depth=3,
max_leaves=None, min_child_weight=None,
missing=nan, monotone_constraints=None,
n_estimators=100, n_jobs=None,
num_parallel_tree=None, predictor=None,
random_state=None, ...),
max_features=211, threshold=-inf), 'feature_selection__estimator__learning_rate': 0.5, 'feature_selection__estimator__max_depth': 3, 'feature_selection__estimator__n_estimators': 500, 'feature_selection__max_features': 527}"	40	0.806417	0.0317683
200_SelectFromModel(estimator=XGBClassifier(base_score=None, booster=None,
callbacks=None, colsample_bylevel=None,
colsample_bynode=None,
colsample_bytree=None,
early_stopping_rounds=None,
enable_categorical=False,
eval_metric=None, feature_types=None,
gamma=None, gpu_id=None,
grow_policy=None, importance_type=None,
interaction_constraints=None,
learning_rate=0.3, max_bin=None,
max_cat_threshold=None,
max_cat_to_onehot=None,
max_delta_step=None, max_depth=3,
max_leaves=None, min_child_weight=None,
missing=nan, monotone_constraints=None,
n_estimators=100, n_jobs=None,
num_parallel_tree=None, predictor=None,
random_state=None, ...),
max_features=211, threshold=-inf)_0.1_3_500_211"	{'classify__C': 200, 'feature_selection': SelectFromModel(estimator=XGBClassifier(base_score=None, booster=None,
callbacks=None, colsample_bylevel=None,
colsample_bynode=None,
colsample_bytree=None,
early_stopping_rounds=None,
enable_categorical=False,
eval_metric=None, feature_types=None,
gamma=None, gpu_id=None,
grow_policy=None, importance_type=None,
interaction_constraints=None,
learning_rate=0.3, max_bin=None,
max_cat_threshold=None,
max_cat_to_onehot=None,
max_delta_step=None, max_depth=3,
max_leaves=None, min_child_weight=None,
missing=nan, monotone_constraints=None,
n_estimators=100, n_jobs=None,
num_parallel_tree=None, predictor=None,
random_state=None, ...),
max_features=211, threshold=-inf), 'feature_selection__estimator__learning_rate': 0.1, 'feature_selection__estimator__max_depth': 3, 'feature_selection__estimator__n_estimators': 500, 'feature_selection__max_features': 211}"	41	0.806336	0.0619721
200_SelectFromModel(estimator=XGBClassifier(base_score=None, booster=None,
callbacks=None, colsample_bylevel=None,
colsample_bynode=None,
colsample_bytree=None,
early_stopping_rounds=None,
enable_categorical=False,
eval_metric=None, feature_types=None,
gamma=None, gpu_id=None,
grow_policy=None, importance_type=None,
interaction_constraints=None,
learning_rate=0.3, max_bin=None,
max_cat_threshold=None,
max_cat_to_onehot=None,
max_delta_step=None, max_depth=3,
max_leaves=None, min_child_weight=None,
missing=nan, monotone_constraints=None,
n_estimators=100, n_jobs=None,
num_parallel_tree=None, predictor=None,
random_state=None, ...),
max_features=211, threshold=-inf)_0.3_3_500_422"	{'classify__C': 200, 'feature_selection': SelectFromModel(estimator=XGBClassifier(base_score=None, booster=None,
callbacks=None, colsample_bylevel=None,
colsample_bynode=None,
colsample_bytree=None,
early_stopping_rounds=None,
enable_categorical=False,
eval_metric=None, feature_types=None,
gamma=None, gpu_id=None,
grow_policy=None, importance_type=None,
interaction_constraints=None,
learning_rate=0.3, max_bin=None,
max_cat_threshold=None,
max_cat_to_onehot=None,
max_delta_step=None, max_depth=3,
max_leaves=None, min_child_weight=None,
missing=nan, monotone_constraints=None,
n_estimators=100, n_jobs=None,
num_parallel_tree=None, predictor=None,
random_state=None, ...),
max_features=211, threshold=-inf), 'feature_selection__estimator__learning_rate': 0.3, 'feature_selection__estimator__max_depth': 3, 'feature_selection__estimator__n_estimators': 500, 'feature_selection__max_features': 422}"	42	0.805244	0.0325021
100_SelectFromModel(estimator=XGBClassifier(base_score=None, booster=None,
callbacks=None, colsample_bylevel=None,
colsample_bynode=None,
colsample_bytree=None,
early_stopping_rounds=None,
enable_categorical=False,
eval_metric=None, feature_types=None,
gamma=None, gpu_id=None,
grow_policy=None, importance_type=None,
interaction_constraints=None,
learning_rate=0.3, max_bin=None,
max_cat_threshold=None,
max_cat_to_onehot=None,
max_delta_step=None, max_depth=3,
max_leaves=None, min_child_weight=None,
missing=nan, monotone_constraints=None,
n_estimators=100, n_jobs=None,
num_parallel_tree=None, predictor=None,
random_state=None, ...),
max_features=211, threshold=-inf)_0.1_3_250_211"	{'classify__C': 100, 'feature_selection': SelectFromModel(estimator=XGBClassifier(base_score=None, booster=None,
callbacks=None, colsample_bylevel=None,
colsample_bynode=None,
colsample_bytree=None,
early_stopping_rounds=None,
enable_categorical=False,
eval_metric=None, feature_types=None,
gamma=None, gpu_id=None,
grow_policy=None, importance_type=None,
interaction_constraints=None,
learning_rate=0.3, max_bin=None,
max_cat_threshold=None,
max_cat_to_onehot=None,
max_delta_step=None, max_depth=3,
max_leaves=None, min_child_weight=None,
missing=nan, monotone_constraints=None,
n_estimators=100, n_jobs=None,
num_parallel_tree=None, predictor=None,
random_state=None, ...),
max_features=211, threshold=-inf), 'feature_selection__estimator__learning_rate': 0.1, 'feature_selection__estimator__max_depth': 3, 'feature_selection__estimator__n_estimators': 250, 'feature_selection__max_features': 211}"	43	0.804599	0.0941474
100_SelectFromModel(estimator=XGBClassifier(base_score=None, booster=None,
callbacks=None, colsample_bylevel=None,
colsample_bynode=None,
colsample_bytree=None,
early_stopping_rounds=None,
enable_categorical=False,
eval_metric=None, feature_types=None,
gamma=None, gpu_id=None,
grow_policy=None, importance_type=None,
interaction_constraints=None,
learning_rate=0.3, max_bin=None,
max_cat_threshold=None,
max_cat_to_onehot=None,
max_delta_step=None, max_depth=3,
max_leaves=None, min_child_weight=None,
missing=nan, monotone_constraints=None,
n_estimators=100, n_jobs=None,
num_parallel_tree=None, predictor=None,
random_state=None, ...),
max_features=211, threshold=-inf)_0.3_3_250_422"	{'classify__C': 100, 'feature_selection': SelectFromModel(estimator=XGBClassifier(base_score=None, booster=None,
callbacks=None, colsample_bylevel=None,
colsample_bynode=None,
colsample_bytree=None,
early_stopping_rounds=None,
enable_categorical=False,
eval_metric=None, feature_types=None,
gamma=None, gpu_id=None,
grow_policy=None, importance_type=None,
interaction_constraints=None,
learning_rate=0.3, max_bin=None,
max_cat_threshold=None,
max_cat_to_onehot=None,
max_delta_step=None, max_depth=3,
max_leaves=None, min_child_weight=None,
missing=nan, monotone_constraints=None,
n_estimators=100, n_jobs=None,
num_parallel_tree=None, predictor=None,
random_state=None, ...),
max_features=211, threshold=-inf), 'feature_selection__estimator__learning_rate': 0.3, 'feature_selection__estimator__max_depth': 3, 'feature_selection__estimator__n_estimators': 250, 'feature_selection__max_features': 422}"	44	0.804548	0.0328472
200_SelectFromModel(estimator=XGBClassifier(base_score=None, booster=None,
callbacks=None, colsample_bylevel=None,
colsample_bynode=None,
colsample_bytree=None,
early_stopping_rounds=None,
enable_categorical=False,
eval_metric=None, feature_types=None,
gamma=None, gpu_id=None,
grow_policy=None, importance_type=None,
interaction_constraints=None,
learning_rate=0.3, max_bin=None,
max_cat_threshold=None,
max_cat_to_onehot=None,
max_delta_step=None, max_depth=3,
max_leaves=None, min_child_weight=None,
missing=nan, monotone_constraints=None,
n_estimators=100, n_jobs=None,
num_parallel_tree=None, predictor=None,
random_state=None, ...),
max_features=211, threshold=-inf)_0.5_5_500_211"	{'classify__C': 200, 'feature_selection': SelectFromModel(estimator=XGBClassifier(base_score=None, booster=None,
callbacks=None, colsample_bylevel=None,
colsample_bynode=None,
colsample_bytree=None,
early_stopping_rounds=None,
enable_categorical=False,
eval_metric=None, feature_types=None,
gamma=None, gpu_id=None,
grow_policy=None, importance_type=None,
interaction_constraints=None,
learning_rate=0.3, max_bin=None,
max_cat_threshold=None,
max_cat_to_onehot=None,
max_delta_step=None, max_depth=3,
max_leaves=None, min_child_weight=None,
missing=nan, monotone_constraints=None,
n_estimators=100, n_jobs=None,
num_parallel_tree=None, predictor=None,
random_state=None, ...),
max_features=211, threshold=-inf), 'feature_selection__estimator__learning_rate': 0.5, 'feature_selection__estimator__max_depth': 5, 'feature_selection__estimator__n_estimators': 500, 'feature_selection__max_features': 211}"	45	0.803053	0.039362
100_SelectFromModel(estimator=XGBClassifier(base_score=None, booster=None,
callbacks=None, colsample_bylevel=None,
colsample_bynode=None,
colsample_bytree=None,
early_stopping_rounds=None,
enable_categorical=False,
eval_metric=None, feature_types=None,
gamma=None, gpu_id=None,
grow_policy=None, importance_type=None,
interaction_constraints=None,
learning_rate=0.3, max_bin=None,
max_cat_threshold=None,
max_cat_to_onehot=None,
max_delta_step=None, max_depth=3,
max_leaves=None, min_child_weight=None,
missing=nan, monotone_constraints=None,
n_estimators=100, n_jobs=None,
num_parallel_tree=None, predictor=None,
random_state=None, ...),
max_features=211, threshold=-inf)_0.5_5_250_211"	{'classify__C': 100, 'feature_selection': SelectFromModel(estimator=XGBClassifier(base_score=None, booster=None,
callbacks=None, colsample_bylevel=None,
colsample_bynode=None,
colsample_bytree=None,
early_stopping_rounds=None,
enable_categorical=False,
eval_metric=None, feature_types=None,
gamma=None, gpu_id=None,
grow_policy=None, importance_type=None,
interaction_constraints=None,
learning_rate=0.3, max_bin=None,
max_cat_threshold=None,
max_cat_to_onehot=None,
max_delta_step=None, max_depth=3,
max_leaves=None, min_child_weight=None,
missing=nan, monotone_constraints=None,
n_estimators=100, n_jobs=None,
num_parallel_tree=None, predictor=None,
random_state=None, ...),
max_features=211, threshold=-inf), 'feature_selection__estimator__learning_rate': 0.5, 'feature_selection__estimator__max_depth': 5, 'feature_selection__estimator__n_estimators': 250, 'feature_selection__max_features': 211}"	46	0.801108	0.0384398
100_SelectFromModel(estimator=XGBClassifier(base_score=None, booster=None,
callbacks=None, colsample_bylevel=None,
colsample_bynode=None,
colsample_bytree=None,
early_stopping_rounds=None,
enable_categorical=False,
eval_metric=None, feature_types=None,
gamma=None, gpu_id=None,
grow_policy=None, importance_type=None,
interaction_constraints=None,
learning_rate=0.3, max_bin=None,
max_cat_threshold=None,
max_cat_to_onehot=None,
max_delta_step=None, max_depth=3,
max_leaves=None, min_child_weight=None,
missing=nan, monotone_constraints=None,
n_estimators=100, n_jobs=None,
num_parallel_tree=None, predictor=None,
random_state=None, ...),
max_features=211, threshold=-inf)_0.1_3_250_422"	{'classify__C': 100, 'feature_selection': SelectFromModel(estimator=XGBClassifier(base_score=None, booster=None,
callbacks=None, colsample_bylevel=None,
colsample_bynode=None,
colsample_bytree=None,
early_stopping_rounds=None,
enable_categorical=False,
eval_metric=None, feature_types=None,
gamma=None, gpu_id=None,
grow_policy=None, importance_type=None,
interaction_constraints=None,
learning_rate=0.3, max_bin=None,
max_cat_threshold=None,
max_cat_to_onehot=None,
max_delta_step=None, max_depth=3,
max_leaves=None, min_child_weight=None,
missing=nan, monotone_constraints=None,
n_estimators=100, n_jobs=None,
num_parallel_tree=None, predictor=None,
random_state=None, ...),
max_features=211, threshold=-inf), 'feature_selection__estimator__learning_rate': 0.1, 'feature_selection__estimator__max_depth': 3, 'feature_selection__estimator__n_estimators': 250, 'feature_selection__max_features': 422}"	47	0.800837	0.051938
200_SelectFromModel(estimator=XGBClassifier(base_score=None, booster=None,
callbacks=None, colsample_bylevel=None,
colsample_bynode=None,
colsample_bytree=None,
early_stopping_rounds=None,
enable_categorical=False,
eval_metric=None, feature_types=None,
gamma=None, gpu_id=None,
grow_policy=None, importance_type=None,
interaction_constraints=None,
learning_rate=0.3, max_bin=None,
max_cat_threshold=None,
max_cat_to_onehot=None,
max_delta_step=None, max_depth=3,
max_leaves=None, min_child_weight=None,
missing=nan, monotone_constraints=None,
n_estimators=100, n_jobs=None,
num_parallel_tree=None, predictor=None,
random_state=None, ...),
max_features=211, threshold=-inf)_0.1_3_250_527"	{'classify__C': 200, 'feature_selection': SelectFromModel(estimator=XGBClassifier(base_score=None, booster=None,
callbacks=None, colsample_bylevel=None,
colsample_bynode=None,
colsample_bytree=None,
early_stopping_rounds=None,
enable_categorical=False,
eval_metric=None, feature_types=None,
gamma=None, gpu_id=None,
grow_policy=None, importance_type=None,
interaction_constraints=None,
learning_rate=0.3, max_bin=None,
max_cat_threshold=None,
max_cat_to_onehot=None,
max_delta_step=None, max_depth=3,
max_leaves=None, min_child_weight=None,
missing=nan, monotone_constraints=None,
n_estimators=100, n_jobs=None,
num_parallel_tree=None, predictor=None,
random_state=None, ...),
max_features=211, threshold=-inf), 'feature_selection__estimator__learning_rate': 0.1, 'feature_selection__estimator__max_depth': 3, 'feature_selection__estimator__n_estimators': 250, 'feature_selection__max_features': 527}"	48	0.798897	0.0416426
100_SelectFromModel(estimator=XGBClassifier(base_score=None, booster=None,
callbacks=None, colsample_bylevel=None,
colsample_bynode=None,
colsample_bytree=None,
early_stopping_rounds=None,
enable_categorical=False,
eval_metric=None, feature_types=None,
gamma=None, gpu_id=None,
grow_policy=None, importance_type=None,
interaction_constraints=None,
learning_rate=0.3, max_bin=None,
max_cat_threshold=None,
max_cat_to_onehot=None,
max_delta_step=None, max_depth=3,
max_leaves=None, min_child_weight=None,
missing=nan, monotone_constraints=None,
n_estimators=100, n_jobs=None,
num_parallel_tree=None, predictor=None,
random_state=None, ...),
max_features=211, threshold=-inf)_0.3_3_500_422"	{'classify__C': 100, 'feature_selection': SelectFromModel(estimator=XGBClassifier(base_score=None, booster=None,
callbacks=None, colsample_bylevel=None,
colsample_bynode=None,
colsample_bytree=None,
early_stopping_rounds=None,
enable_categorical=False,
eval_metric=None, feature_types=None,
gamma=None, gpu_id=None,
grow_policy=None, importance_type=None,
interaction_constraints=None,
learning_rate=0.3, max_bin=None,
max_cat_threshold=None,
max_cat_to_onehot=None,
max_delta_step=None, max_depth=3,
max_leaves=None, min_child_weight=None,
missing=nan, monotone_constraints=None,
n_estimators=100, n_jobs=None,
num_parallel_tree=None, predictor=None,
random_state=None, ...),
max_features=211, threshold=-inf), 'feature_selection__estimator__learning_rate': 0.3, 'feature_selection__estimator__max_depth': 3, 'feature_selection__estimator__n_estimators': 500, 'feature_selection__max_features': 422}"	49	0.797308	0.0328042
200_SelectFromModel(estimator=XGBClassifier(base_score=None, booster=None,
callbacks=None, colsample_bylevel=None,
colsample_bynode=None,
colsample_bytree=None,
early_stopping_rounds=None,
enable_categorical=False,
eval_metric=None, feature_types=None,
gamma=None, gpu_id=None,
grow_policy=None, importance_type=None,
interaction_constraints=None,
learning_rate=0.3, max_bin=None,
max_cat_threshold=None,
max_cat_to_onehot=None,
max_delta_step=None, max_depth=3,
max_leaves=None, min_child_weight=None,
missing=nan, monotone_constraints=None,
n_estimators=100, n_jobs=None,
num_parallel_tree=None, predictor=None,
random_state=None, ...),
max_features=211, threshold=-inf)_0.3_3_250_527"	{'classify__C': 200, 'feature_selection': SelectFromModel(estimator=XGBClassifier(base_score=None, booster=None,
callbacks=None, colsample_bylevel=None,
colsample_bynode=None,
colsample_bytree=None,
early_stopping_rounds=None,
enable_categorical=False,
eval_metric=None, feature_types=None,
gamma=None, gpu_id=None,
grow_policy=None, importance_type=None,
interaction_constraints=None,
learning_rate=0.3, max_bin=None,
max_cat_threshold=None,
max_cat_to_onehot=None,
max_delta_step=None, max_depth=3,
max_leaves=None, min_child_weight=None,
missing=nan, monotone_constraints=None,
n_estimators=100, n_jobs=None,
num_parallel_tree=None, predictor=None,
random_state=None, ...),
max_features=211, threshold=-inf), 'feature_selection__estimator__learning_rate': 0.3, 'feature_selection__estimator__max_depth': 3, 'feature_selection__estimator__n_estimators': 250, 'feature_selection__max_features': 527}"	50	0.793821	0.0304687
100_SelectFromModel(estimator=XGBClassifier(base_score=None, booster=None,
callbacks=None, colsample_bylevel=None,
colsample_bynode=None,
colsample_bytree=None,
early_stopping_rounds=None,
enable_categorical=False,
eval_metric=None, feature_types=None,
gamma=None, gpu_id=None,
grow_policy=None, importance_type=None,
interaction_constraints=None,
learning_rate=0.3, max_bin=None,
max_cat_threshold=None,
max_cat_to_onehot=None,
max_delta_step=None, max_depth=3,
max_leaves=None, min_child_weight=None,
missing=nan, monotone_constraints=None,
n_estimators=100, n_jobs=None,
num_parallel_tree=None, predictor=None,
random_state=None, ...),
max_features=211, threshold=-inf)_0.5_5_500_211"	{'classify__C': 100, 'feature_selection': SelectFromModel(estimator=XGBClassifier(base_score=None, booster=None,
callbacks=None, colsample_bylevel=None,
colsample_bynode=None,
colsample_bytree=None,
early_stopping_rounds=None,
enable_categorical=False,
eval_metric=None, feature_types=None,
gamma=None, gpu_id=None,
grow_policy=None, importance_type=None,
interaction_constraints=None,
learning_rate=0.3, max_bin=None,
max_cat_threshold=None,
max_cat_to_onehot=None,
max_delta_step=None, max_depth=3,
max_leaves=None, min_child_weight=None,
missing=nan, monotone_constraints=None,
n_estimators=100, n_jobs=None,
num_parallel_tree=None, predictor=None,
random_state=None, ...),
max_features=211, threshold=-inf), 'feature_selection__estimator__learning_rate': 0.5, 'feature_selection__estimator__max_depth': 5, 'feature_selection__estimator__n_estimators': 500, 'feature_selection__max_features': 211}"	51	0.790608	0.035734
100_SelectFromModel(estimator=XGBClassifier(base_score=None, booster=None,
callbacks=None, colsample_bylevel=None,
colsample_bynode=None,
colsample_bytree=None,
early_stopping_rounds=None,
enable_categorical=False,
eval_metric=None, feature_types=None,
gamma=None, gpu_id=None,
grow_policy=None, importance_type=None,
interaction_constraints=None,
[truncated: 19,061 more rows]

## Sheet: XGBoost_SVC_Amodels_perfomances
	model_1	model_2	t_stat	p_val	worse_prob	better_prob	rope_prob
0	200_SelectFromModel(estimator=XGBClassifier(base_score=None, booster=None,
callbacks=None, colsample_bylevel=None,
colsample_bynode=None,
colsample_bytree=None,
early_stopping_rounds=None,
enable_categorical=False,
eval_metric=None, feature_types=None,
gamma=None, gpu_id=None,
grow_policy=None, importance_type=None,
interaction_constraints=None,
learning_rate=0.5, max_bin=None,
max_cat_threshold=None,
max_cat_to_onehot=None,
max_delta_step=None, max_depth=3,
max_leaves=None, min_child_weight=None,
missing=nan, monotone_constraints=None,
n_estimators=100, n_jobs=None,
num_parallel_tree=None, predictor=None,
random_state=None, ...),
max_features=207, threshold=-inf)_0.5_3_100_207"	200_SelectFromModel(estimator=XGBClassifier(base_score=None, booster=None,
callbacks=None, colsample_bylevel=None,
colsample_bynode=None,
colsample_bytree=None,
early_stopping_rounds=None,
enable_categorical=False,
eval_metric=None, feature_types=None,
gamma=None, gpu_id=None,
grow_policy=None, importance_type=None,
interaction_constraints=None,
learning_rate=0.5, max_bin=None,
max_cat_threshold=None,
max_cat_to_onehot=None,
max_delta_step=None, max_depth=3,
max_leaves=None, min_child_weight=None,
missing=nan, monotone_constraints=None,
n_estimators=100, n_jobs=None,
num_parallel_tree=None, predictor=None,
random_state=None, ...),
max_features=207, threshold=-inf)_0.3_3_100_207"	0.396	1	0.105	0.296	0.598
1	200_SelectFromModel(estimator=XGBClassifier(base_score=None, booster=None,
callbacks=None, colsample_bylevel=None,
colsample_bynode=None,
colsample_bytree=None,
early_stopping_rounds=None,
enable_categorical=False,
eval_metric=None, feature_types=None,
gamma=None, gpu_id=None,
grow_policy=None, importance_type=None,
interaction_constraints=None,
learning_rate=0.5, max_bin=None,
max_cat_threshold=None,
max_cat_to_onehot=None,
max_delta_step=None, max_depth=3,
max_leaves=None, min_child_weight=None,
missing=nan, monotone_constraints=None,
n_estimators=100, n_jobs=None,
num_parallel_tree=None, predictor=None,
random_state=None, ...),
max_features=207, threshold=-inf)_0.5_3_100_207"	100_SelectFromModel(estimator=XGBClassifier(base_score=None, booster=None,
callbacks=None, colsample_bylevel=None,
colsample_bynode=None,
colsample_bytree=None,
early_stopping_rounds=None,
enable_categorical=False,
eval_metric=None, feature_types=None,
gamma=None, gpu_id=None,
grow_policy=None, importance_type=None,
interaction_constraints=None,
learning_rate=0.5, max_bin=None,
max_cat_threshold=None,
max_cat_to_onehot=None,
max_delta_step=None, max_depth=3,
max_leaves=None, min_child_weight=None,
missing=nan, monotone_constraints=None,
n_estimators=100, n_jobs=None,
num_parallel_tree=None, predictor=None,
random_state=None, ...),
max_features=207, threshold=-inf)_0.5_3_100_207"	2.105	1	0	0.165	0.835
2	200_SelectFromModel(estimator=XGBClassifier(base_score=None, booster=None,
callbacks=None, colsample_bylevel=None,
colsample_bynode=None,
colsample_bytree=None,
early_stopping_rounds=None,
enable_categorical=False,
eval_metric=None, feature_types=None,
gamma=None, gpu_id=None,
grow_policy=None, importance_type=None,
interaction_constraints=None,
learning_rate=0.5, max_bin=None,
max_cat_threshold=None,
max_cat_to_onehot=None,
max_delta_step=None, max_depth=3,
max_leaves=None, min_child_weight=None,
missing=nan, monotone_constraints=None,
n_estimators=100, n_jobs=None,
num_parallel_tree=None, predictor=None,
random_state=None, ...),
max_features=207, threshold=-inf)_0.5_3_100_207"	100_SelectFromModel(estimator=XGBClassifier(base_score=None, booster=None,
callbacks=None, colsample_bylevel=None,
colsample_bynode=None,
colsample_bytree=None,
early_stopping_rounds=None,
enable_categorical=False,
eval_metric=None, feature_types=None,
gamma=None, gpu_id=None,
grow_policy=None, importance_type=None,
interaction_constraints=None,
learning_rate=0.5, max_bin=None,
max_cat_threshold=None,
max_cat_to_onehot=None,
max_delta_step=None, max_depth=3,
max_leaves=None, min_child_weight=None,
missing=nan, monotone_constraints=None,
n_estimators=100, n_jobs=None,
num_parallel_tree=None, predictor=None,
random_state=None, ...),
max_features=207, threshold=-inf)_0.3_3_100_207"	1.814	1	0.009	0.762	0.229
3	200_SelectFromModel(estimator=XGBClassifier(base_score=None, booster=None,
callbacks=None, colsample_bylevel=None,
colsample_bynode=None,
colsample_bytree=None,
early_stopping_rounds=None,
enable_categorical=False,
eval_metric=None, feature_types=None,
gamma=None, gpu_id=None,
grow_policy=None, importance_type=None,
interaction_constraints=None,
learning_rate=0.5, max_bin=None,
max_cat_threshold=None,
max_cat_to_onehot=None,
max_delta_step=None, max_depth=3,
max_leaves=None, min_child_weight=None,
missing=nan, monotone_constraints=None,
n_estimators=100, n_jobs=None,
num_parallel_tree=None, predictor=None,
random_state=None, ...),
max_features=207, threshold=-inf)_0.5_3_100_207"	200_SelectFromModel(estimator=XGBClassifier(base_score=None, booster=None,
callbacks=None, colsample_bylevel=None,
colsample_bynode=None,
colsample_bytree=None,
early_stopping_rounds=None,
enable_categorical=False,
eval_metric=None, feature_types=None,
gamma=None, gpu_id=None,
grow_policy=None, importance_type=None,
interaction_constraints=None,
learning_rate=0.5, max_bin=None,
max_cat_threshold=None,
max_cat_to_onehot=None,
max_delta_step=None, max_depth=3,
max_leaves=None, min_child_weight=None,
missing=nan, monotone_constraints=None,
n_estimators=100, n_jobs=None,
num_parallel_tree=None, predictor=None,
random_state=None, ...),
max_features=207, threshold=-inf)_0.5_3_250_207"	4.31	1	0	0.972	0.028
4	200_SelectFromModel(estimator=XGBClassifier(base_score=None, booster=None,
callbacks=None, colsample_bylevel=None,
colsample_bynode=None,
colsample_bytree=None,
early_stopping_rounds=None,
enable_categorical=False,
eval_metric=None, feature_types=None,
gamma=None, gpu_id=None,
grow_policy=None, importance_type=None,
interaction_constraints=None,
learning_rate=0.5, max_bin=None,
max_cat_threshold=None,
max_cat_to_onehot=None,
max_delta_step=None, max_depth=3,
max_leaves=None, min_child_weight=None,
missing=nan, monotone_constraints=None,
n_estimators=100, n_jobs=None,
num_parallel_tree=None, predictor=None,
random_state=None, ...),
max_features=207, threshold=-inf)_0.5_3_100_207"	100_SelectFromModel(estimator=XGBClassifier(base_score=None, booster=None,
callbacks=None, colsample_bylevel=None,
colsample_bynode=None,
colsample_bytree=None,
early_stopping_rounds=None,
enable_categorical=False,
eval_metric=None, feature_types=None,
gamma=None, gpu_id=None,
grow_policy=None, importance_type=None,
interaction_constraints=None,
learning_rate=0.5, max_bin=None,
max_cat_threshold=None,
max_cat_to_onehot=None,
max_delta_step=None, max_depth=3,
max_leaves=None, min_child_weight=None,
missing=nan, monotone_constraints=None,
n_estimators=100, n_jobs=None,
num_parallel_tree=None, predictor=None,
random_state=None, ...),
max_features=207, threshold=-inf)_0.5_3_250_207"	4.857	1	0	0.993	0.007
5	200_SelectFromModel(estimator=XGBClassifier(base_score=None, booster=None,
callbacks=None, colsample_bylevel=None,
colsample_bynode=None,
colsample_bytree=None,
early_stopping_rounds=None,
enable_categorical=False,
eval_metric=None, feature_types=None,
gamma=None, gpu_id=None,
grow_policy=None, importance_type=None,
interaction_constraints=None,
learning_rate=0.5, max_bin=None,
max_cat_threshold=None,
max_cat_to_onehot=None,
max_delta_step=None, max_depth=3,
max_leaves=None, min_child_weight=None,
missing=nan, monotone_constraints=None,
n_estimators=100, n_jobs=None,
num_parallel_tree=None, predictor=None,
random_state=None, ...),
max_features=207, threshold=-inf)_0.5_3_100_207"	200_SelectFromModel(estimator=XGBClassifier(base_score=None, booster=None,
callbacks=None, colsample_bylevel=None,
colsample_bynode=None,
colsample_bytree=None,
early_stopping_rounds=None,
enable_categorical=False,
eval_metric=None, feature_types=None,
gamma=None, gpu_id=None,
grow_policy=None, importance_type=None,
interaction_constraints=None,
learning_rate=0.5, max_bin=None,
max_cat_threshold=None,
max_cat_to_onehot=None,
max_delta_step=None, max_depth=3,
max_leaves=None, min_child_weight=None,
missing=nan, monotone_constraints=None,
n_estimators=100, n_jobs=None,
num_parallel_tree=None, predictor=None,
random_state=None, ...),
max_features=207, threshold=-inf)_0.5_3_500_207"	5.764	1	0	0.998	0.002
6	200_SelectFromModel(estimator=XGBClassifier(base_score=None, booster=None,
callbacks=None, colsample_bylevel=None,
colsample_bynode=None,
colsample_bytree=None,
early_stopping_rounds=None,
enable_categorical=False,
eval_metric=None, feature_types=None,
gamma=None, gpu_id=None,
grow_policy=None, importance_type=None,
interaction_constraints=None,
learning_rate=0.5, max_bin=None,
max_cat_threshold=None,
max_cat_to_onehot=None,
max_delta_step=None, max_depth=3,
max_leaves=None, min_child_weight=None,
missing=nan, monotone_constraints=None,
n_estimators=100, n_jobs=None,
num_parallel_tree=None, predictor=None,
random_state=None, ...),
max_features=207, threshold=-inf)_0.5_3_100_207"	200_SelectFromModel(estimator=XGBClassifier(base_score=None, booster=None,
callbacks=None, colsample_bylevel=None,
colsample_bynode=None,
colsample_bytree=None,
early_stopping_rounds=None,
enable_categorical=False,
eval_metric=None, feature_types=None,
gamma=None, gpu_id=None,
grow_policy=None, importance_type=None,
interaction_constraints=None,
learning_rate=0.5, max_bin=None,
max_cat_threshold=None,
max_cat_to_onehot=None,
max_delta_step=None, max_depth=3,
max_leaves=None, min_child_weight=None,
missing=nan, monotone_constraints=None,
n_estimators=100, n_jobs=None,
num_parallel_tree=None, predictor=None,
random_state=None, ...),
max_features=207, threshold=-inf)_0.5_3_100_413"	5.335	1	0	0.997	0.003
7	200_SelectFromModel(estimator=XGBClassifier(base_score=None, booster=None,
callbacks=None, colsample_bylevel=None,
colsample_bynode=None,
colsample_bytree=None,
early_stopping_rounds=None,
enable_categorical=False,
eval_metric=None, feature_types=None,
gamma=None, gpu_id=None,
grow_policy=None, importance_type=None,
interaction_constraints=None,
learning_rate=0.5, max_bin=None,
max_cat_threshold=None,
max_cat_to_onehot=None,
max_delta_step=None, max_depth=3,
max_leaves=None, min_child_weight=None,
missing=nan, monotone_constraints=None,
n_estimators=100, n_jobs=None,
num_parallel_tree=None, predictor=None,
random_state=None, ...),
max_features=207, threshold=-inf)_0.5_3_100_207"	200_SelectFromModel(estimator=XGBClassifier(base_score=None, booster=None,
callbacks=None, colsample_bylevel=None,
colsample_bynode=None,
colsample_bytree=None,
early_stopping_rounds=None,
enable_categorical=False,
eval_metric=None, feature_types=None,
gamma=None, gpu_id=None,
grow_policy=None, importance_type=None,
interaction_constraints=None,
learning_rate=0.5, max_bin=None,
max_cat_threshold=None,
max_cat_to_onehot=None,
max_delta_step=None, max_depth=3,
max_leaves=None, min_child_weight=None,
missing=nan, monotone_constraints=None,
n_estimators=100, n_jobs=None,
num_parallel_tree=None, predictor=None,
random_state=None, ...),
max_features=207, threshold=-inf)_0.1_3_100_207"	1.849	1	0.019	0.88	0.101
8	200_SelectFromModel(estimator=XGBClassifier(base_score=None, booster=None,
callbacks=None, colsample_bylevel=None,
colsample_bynode=None,
colsample_bytree=None,
early_stopping_rounds=None,
enable_categorical=False,
eval_metric=None, feature_types=None,
gamma=None, gpu_id=None,
grow_policy=None, importance_type=None,
interaction_constraints=None,
learning_rate=0.5, max_bin=None,
max_cat_threshold=None,
max_cat_to_onehot=None,
max_delta_step=None, max_depth=3,
max_leaves=None, min_child_weight=None,
missing=nan, monotone_constraints=None,
n_estimators=100, n_jobs=None,
num_parallel_tree=None, predictor=None,
random_state=None, ...),
max_features=207, threshold=-inf)_0.5_3_100_207"	200_SelectFromModel(estimator=XGBClassifier(base_score=None, booster=None,
callbacks=None, colsample_bylevel=None,
colsample_bynode=None,
colsample_bytree=None,
early_stopping_rounds=None,
enable_categorical=False,
eval_metric=None, feature_types=None,
gamma=None, gpu_id=None,
grow_policy=None, importance_type=None,
interaction_constraints=None,
learning_rate=0.5, max_bin=None,
max_cat_threshold=None,
max_cat_to_onehot=None,
max_delta_step=None, max_depth=3,
max_leaves=None, min_child_weight=None,
missing=nan, monotone_constraints=None,
n_estimators=100, n_jobs=None,
num_parallel_tree=None, predictor=None,
random_state=None, ...),
max_features=207, threshold=-inf)_0.5_3_100_517"	2.947	1	0.002	0.964	0.034
9	200_SelectFromModel(estimator=XGBClassifier(base_score=None, booster=None,
callbacks=None, colsample_bylevel=None,
colsample_bynode=None,
colsample_bytree=None,
early_stopping_rounds=None,
enable_categorical=False,
eval_metric=None, feature_types=None,
gamma=None, gpu_id=None,
grow_policy=None, importance_type=None,
interaction_constraints=None,
learning_rate=0.5, max_bin=None,
max_cat_threshold=None,
max_cat_to_onehot=None,
max_delta_step=None, max_depth=3,
max_leaves=None, min_child_weight=None,
missing=nan, monotone_constraints=None,
n_estimators=100, n_jobs=None,
num_parallel_tree=None, predictor=None,
random_state=None, ...),
max_features=207, threshold=-inf)_0.5_3_100_207"	100_SelectFromModel(estimator=XGBClassifier(base_score=None, booster=None,
callbacks=None, colsample_bylevel=None,
colsample_bynode=None,
colsample_bytree=None,
early_stopping_rounds=None,
enable_categorical=False,
eval_metric=None, feature_types=None,
gamma=None, gpu_id=None,
grow_policy=None, importance_type=None,
interaction_constraints=None,
learning_rate=0.5, max_bin=None,
max_cat_threshold=None,
max_cat_to_onehot=None,
max_delta_step=None, max_depth=3,
max_leaves=None, min_child_weight=None,
missing=nan, monotone_constraints=None,
n_estimators=100, n_jobs=None,
num_parallel_tree=None, predictor=None,
random_state=None, ...),
max_features=207, threshold=-inf)_0.5_3_500_207"	7.584	1	0	1	0
10	200_SelectFromModel(estimator=XGBClassifier(base_score=None, booster=None,
callbacks=None, colsample_bylevel=None,
colsample_bynode=None,
colsample_bytree=None,
early_stopping_rounds=None,
enable_categorical=False,
eval_metric=None, feature_types=None,
gamma=None, gpu_id=None,
grow_policy=None, importance_type=None,
interaction_constraints=None,
learning_rate=0.5, max_bin=None,
max_cat_threshold=None,
max_cat_to_onehot=None,
max_delta_step=None, max_depth=3,
max_leaves=None, min_child_weight=None,
missing=nan, monotone_constraints=None,
n_estimators=100, n_jobs=None,
num_parallel_tree=None, predictor=None,
random_state=None, ...),
max_features=207, threshold=-inf)_0.5_3_100_207"	100_SelectFromModel(estimator=XGBClassifier(base_score=None, booster=None,
callbacks=None, colsample_bylevel=None,
colsample_bynode=None,
colsample_bytree=None,
early_stopping_rounds=None,
enable_categorical=False,
eval_metric=None, feature_types=None,
gamma=None, gpu_id=None,
grow_policy=None, importance_type=None,
interaction_constraints=None,
learning_rate=0.5, max_bin=None,
max_cat_threshold=None,
max_cat_to_onehot=None,
max_delta_step=None, max_depth=3,
max_leaves=None, min_child_weight=None,
missing=nan, monotone_constraints=None,
n_estimators=100, n_jobs=None,
num_parallel_tree=None, predictor=None,
random_state=None, ...),
max_features=207, threshold=-inf)_0.5_3_100_413"	5.285	1	0	0.998	0.002
11	200_SelectFromModel(estimator=XGBClassifier(base_score=None, booster=None,
callbacks=None, colsample_bylevel=None,
colsample_bynode=None,
colsample_bytree=None,
early_stopping_rounds=None,
enable_categorical=False,
eval_metric=None, feature_types=None,
gamma=None, gpu_id=None,
grow_policy=None, importance_type=None,
interaction_constraints=None,
learning_rate=0.5, max_bin=None,
max_cat_threshold=None,
max_cat_to_onehot=None,
max_delta_step=None, max_depth=3,
max_leaves=None, min_child_weight=None,
missing=nan, monotone_constraints=None,
n_estimators=100, n_jobs=None,
num_parallel_tree=None, predictor=None,
random_state=None, ...),
max_features=207, threshold=-inf)_0.5_3_100_207"	100_SelectFromModel(estimator=XGBClassifier(base_score=None, booster=None,
callbacks=None, colsample_bylevel=None,
colsample_bynode=None,
colsample_bytree=None,
early_stopping_rounds=None,
enable_categorical=False,
eval_metric=None, feature_types=None,
gamma=None, gpu_id=None,
grow_policy=None, importance_type=None,
interaction_constraints=None,
learning_rate=0.5, max_bin=None,
max_cat_threshold=None,
max_cat_to_onehot=None,
max_delta_step=None, max_depth=3,
max_leaves=None, min_child_weight=None,
missing=nan, monotone_constraints=None,
n_estimators=100, n_jobs=None,
num_parallel_tree=None, predictor=None,
random_state=None, ...),
max_features=207, threshold=-inf)_0.5_3_100_517"	3.691	1	0.001	0.988	0.012
12	200_SelectFromModel(estimator=XGBClassifier(base_score=None, booster=None,
callbacks=None, colsample_bylevel=None,
colsample_bynode=None,
colsample_bytree=None,
early_stopping_rounds=None,
enable_categorical=False,
eval_metric=None, feature_types=None,
gamma=None, gpu_id=None,
grow_policy=None, importance_type=None,
interaction_constraints=None,
learning_rate=0.5, max_bin=None,
max_cat_threshold=None,
max_cat_to_onehot=None,
max_delta_step=None, max_depth=3,
max_leaves=None, min_child_weight=None,
missing=nan, monotone_constraints=None,
n_estimators=100, n_jobs=None,
num_parallel_tree=None, predictor=None,
random_state=None, ...),
max_features=207, threshold=-inf)_0.5_3_100_207"	200_SelectFromModel(estimator=XGBClassifier(base_score=None, booster=None,
callbacks=None, colsample_bylevel=None,
colsample_bynode=None,
colsample_bytree=None,
early_stopping_rounds=None,
enable_categorical=False,
eval_metric=None, feature_types=None,
gamma=None, gpu_id=None,
grow_policy=None, importance_type=None,
interaction_constraints=None,
learning_rate=0.5, max_bin=None,
max_cat_threshold=None,
max_cat_to_onehot=None,
max_delta_step=None, max_depth=3,
max_leaves=None, min_child_weight=None,
missing=nan, monotone_constraints=None,
n_estimators=100, n_jobs=None,
num_parallel_tree=None, predictor=None,
random_state=None, ...),
max_features=207, threshold=-inf)_0.1_3_100_413"	2.294	1	0.009	0.94	0.051
13	200_SelectFromModel(estimator=XGBClassifier(base_score=None, booster=None,
callbacks=None, colsample_bylevel=None,
colsample_bynode=None,
colsample_bytree=None,
early_stopping_rounds=None,
enable_categorical=False,
eval_metric=None, feature_types=None,
gamma=None, gpu_id=None,
grow_policy=None, importance_type=None,
interaction_constraints=None,
learning_rate=0.5, max_bin=None,
max_cat_threshold=None,
max_cat_to_onehot=None,
max_delta_step=None, max_depth=3,
max_leaves=None, min_child_weight=None,
missing=nan, monotone_constraints=None,
n_estimators=100, n_jobs=None,
num_parallel_tree=None, predictor=None,
random_state=None, ...),
max_features=207, threshold=-inf)_0.5_3_100_207"	100_SelectFromModel(estimator=XGBClassifier(base_score=None, booster=None,
callbacks=None, colsample_bylevel=None,
colsample_bynode=None,
colsample_bytree=None,
early_stopping_rounds=None,
enable_categorical=False,
eval_metric=None, feature_types=None,
gamma=None, gpu_id=None,
grow_policy=None, importance_type=None,
interaction_constraints=None,
learning_rate=0.5, max_bin=None,
max_cat_threshold=None,
max_cat_to_onehot=None,
max_delta_step=None, max_depth=3,
max_leaves=None, min_child_weight=None,
missing=nan, monotone_constraints=None,
n_estimators=100, n_jobs=None,
num_parallel_tree=None, predictor=None,
random_state=None, ...),
max_features=207, threshold=-inf)_0.5_3_250_517"	3.324	1	0.001	0.983	0.016
14	200_SelectFromModel(estimator=XGBClassifier(base_score=None, booster=None,
callbacks=None, colsample_bylevel=None,
colsample_bynode=None,
colsample_bytree=None,
early_stopping_rounds=None,
enable_categorical=False,
eval_metric=None, feature_types=None,
gamma=None, gpu_id=None,
grow_policy=None, importance_type=None,
interaction_constraints=None,
learning_rate=0.5, max_bin=None,
max_cat_threshold=None,
max_cat_to_onehot=None,
max_delta_step=None, max_depth=3,
max_leaves=None, min_child_weight=None,
missing=nan, monotone_constraints=None,
n_estimators=100, n_jobs=None,
num_parallel_tree=None, predictor=None,
random_state=None, ...),
max_features=207, threshold=-inf)_0.5_3_100_207"	200_SelectFromModel(estimator=XGBClassifier(base_score=None, booster=None,
callbacks=None, colsample_bylevel=None,
colsample_bynode=None,
colsample_bytree=None,
early_stopping_rounds=None,
enable_categorical=False,
eval_metric=None, feature_types=None,
gamma=None, gpu_id=None,
grow_policy=None, importance_type=None,
interaction_constraints=None,
learning_rate=0.5, max_bin=None,
max_cat_threshold=None,
max_cat_to_onehot=None,
max_delta_step=None, max_depth=3,
max_leaves=None, min_child_weight=None,
missing=nan, monotone_constraints=None,
n_estimators=100, n_jobs=None,
num_parallel_tree=None, predictor=None,
random_state=None, ...),
max_features=207, threshold=-inf)_0.5_3_250_517"	3.177	1	0.002	0.98	0.018
15	200_SelectFromModel(estimator=XGBClassifier(base_score=None, booster=None,
callbacks=None, colsample_bylevel=None,
colsample_bynode=None,
colsample_bytree=None,
early_stopping_rounds=None,
enable_categorical=False,
eval_metric=None, feature_types=None,
gamma=None, gpu_id=None,
grow_policy=None, importance_type=None,
interaction_constraints=None,
learning_rate=0.5, max_bin=None,
max_cat_threshold=None,
max_cat_to_onehot=None,
max_delta_step=None, max_depth=3,
max_leaves=None, min_child_weight=None,
missing=nan, monotone_constraints=None,
n_estimators=100, n_jobs=None,
num_parallel_tree=None, predictor=None,
random_state=None, ...),
max_features=207, threshold=-inf)_0.5_3_100_207"	100_SelectFromModel(estimator=XGBClassifier(base_score=None, booster=None,
callbacks=None, colsample_bylevel=None,
colsample_bynode=None,
colsample_bytree=None,
early_stopping_rounds=None,
enable_categorical=False,
eval_metric=None, feature_types=None,
gamma=None, gpu_id=None,
grow_policy=None, importance_type=None,
interaction_constraints=None,
learning_rate=0.5, max_bin=None,
max_cat_threshold=None,
max_cat_to_onehot=None,
max_delta_step=None, max_depth=3,
max_leaves=None, min_child_weight=None,
missing=nan, monotone_constraints=None,
n_estimators=100, n_jobs=None,
num_parallel_tree=None, predictor=None,
random_state=None, ...),
max_features=207, threshold=-inf)_0.5_3_500_517"	3.26	1	0.001	0.982	0.016
16	200_SelectFromModel(estimator=XGBClassifier(base_score=None, booster=None,
callbacks=None, colsample_bylevel=None,
colsample_bynode=None,
colsample_bytree=None,
early_stopping_rounds=None,
enable_categorical=False,
eval_metric=None, feature_types=None,
gamma=None, gpu_id=None,
grow_policy=None, importance_type=None,
interaction_constraints=None,
learning_rate=0.5, max_bin=None,
max_cat_threshold=None,
max_cat_to_onehot=None,
max_delta_step=None, max_depth=3,
max_leaves=None, min_child_weight=None,
missing=nan, monotone_constraints=None,
n_estimators=100, n_jobs=None,
num_parallel_tree=None, predictor=None,
random_state=None, ...),
max_features=207, threshold=-inf)_0.5_3_100_207"	200_SelectFromModel(estimator=XGBClassifier(base_score=None, booster=None,
callbacks=None, colsample_bylevel=None,
colsample_bynode=None,
colsample_bytree=None,
early_stopping_rounds=None,
enable_categorical=False,
eval_metric=None, feature_types=None,
gamma=None, gpu_id=None,
grow_policy=None, importance_type=None,
interaction_constraints=None,
learning_rate=0.5, max_bin=None,
max_cat_threshold=None,
max_cat_to_onehot=None,
max_delta_step=None, max_depth=3,
max_leaves=None, min_child_weight=None,
missing=nan, monotone_constraints=None,
n_estimators=100, n_jobs=None,
num_parallel_tree=None, predictor=None,
random_state=None, ...),
max_features=207, threshold=-inf)_0.5_3_500_517"	3.264	1	0.001	0.982	0.016
17	200_SelectFromModel(estimator=XGBClassifier(base_score=None, booster=None,
callbacks=None, colsample_bylevel=None,
colsample_bynode=None,
colsample_bytree=None,
early_stopping_rounds=None,
enable_categorical=False,
eval_metric=None, feature_types=None,
gamma=None, gpu_id=None,
grow_policy=None, importance_type=None,
interaction_constraints=None,
learning_rate=0.5, max_bin=None,
max_cat_threshold=None,
max_cat_to_onehot=None,
max_delta_step=None, max_depth=3,
max_leaves=None, min_child_weight=None,
missing=nan, monotone_constraints=None,
n_estimators=100, n_jobs=None,
num_parallel_tree=None, predictor=None,
random_state=None, ...),
max_features=207, threshold=-inf)_0.5_3_100_207"	100_SelectFromModel(estimator=XGBClassifier(base_score=None, booster=None,
callbacks=None, colsample_bylevel=None,
colsample_bynode=None,
colsample_bytree=None,
early_stopping_rounds=None,
enable_categorical=False,
eval_metric=None, feature_types=None,
gamma=None, gpu_id=None,
grow_policy=None, importance_type=None,
interaction_constraints=None,
learning_rate=0.5, max_bin=None,
max_cat_threshold=None,
max_cat_to_onehot=None,
max_delta_step=None, max_depth=3,
max_leaves=None, min_child_weight=None,
missing=nan, monotone_constraints=None,
n_estimators=100, n_jobs=None,
num_parallel_tree=None, predictor=None,
random_state=None, ...),
max_features=207, threshold=-inf)_0.1_3_100_207"	2.693	1	0.004	0.965	0.031
18	200_SelectFromModel(estimator=XGBClassifier(base_score=None, booster=None,
callbacks=None, colsample_bylevel=None,
colsample_bynode=None,
colsample_bytree=None,
early_stopping_rounds=None,
enable_categorical=False,
eval_metric=None, feature_types=None,
gamma=None, gpu_id=None,
grow_policy=None, importance_type=None,
interaction_constraints=None,
learning_rate=0.5, max_bin=None,
max_cat_threshold=None,
max_cat_to_onehot=None,
max_delta_step=None, max_depth=3,
max_leaves=None, min_child_weight=None,
missing=nan, monotone_constraints=None,
n_estimators=100, n_jobs=None,
num_parallel_tree=None, predictor=None,
random_state=None, ...),
max_features=207, threshold=-inf)_0.5_3_100_207"	200_SelectFromModel(estimator=XGBClassifier(base_score=None, booster=None,
callbacks=None, colsample_bylevel=None,
colsample_bynode=None,
colsample_bytree=None,
early_stopping_rounds=None,
enable_categorical=False,
eval_metric=None, feature_types=None,
gamma=None, gpu_id=None,
grow_policy=None, importance_type=None,
interaction_constraints=None,
learning_rate=0.5, max_bin=None,
max_cat_threshold=None,
max_cat_to_onehot=None,
max_delta_step=None, max_depth=3,
max_leaves=None, min_child_weight=None,
missing=nan, monotone_constraints=None,
n_estimators=100, n_jobs=None,
num_parallel_tree=None, predictor=None,
random_state=None, ...),
max_features=207, threshold=-inf)_0.3_3_250_207"	4.143	1	0	0.995	0.005
19	200_SelectFromModel(estimator=XGBClassifier(base_score=None, booster=None,
callbacks=None, colsample_bylevel=None,
colsample_bynode=None,
colsample_bytree=None,
early_stopping_rounds=None,
enable_categorical=False,
eval_metric=None, feature_types=None,
gamma=None, gpu_id=None,
grow_policy=None, importance_type=None,
interaction_constraints=None,
learning_rate=0.5, max_bin=None,
max_cat_threshold=None,
max_cat_to_onehot=None,
max_delta_step=None, max_depth=3,
max_leaves=None, min_child_weight=None,
missing=nan, monotone_constraints=None,
n_estimators=100, n_jobs=None,
num_parallel_tree=None, predictor=None,
random_state=None, ...),
max_features=207, threshold=-inf)_0.5_3_100_207"	200_SelectFromModel(estimator=XGBClassifier(base_score=None, booster=None,
callbacks=None, colsample_bylevel=None,
colsample_bynode=None,
colsample_bytree=None,
early_stopping_rounds=None,
enable_categorical=False,
eval_metric=None, feature_types=None,
gamma=None, gpu_id=None,
grow_policy=None, importance_type=None,
interaction_constraints=None,
learning_rate=0.5, max_bin=None,
max_cat_threshold=None,
max_cat_to_onehot=None,
max_delta_step=None, max_depth=3,
max_leaves=None, min_child_weight=None,
missing=nan, monotone_constraints=None,
n_estimators=100, n_jobs=None,
num_parallel_tree=None, predictor=None,
random_state=None, ...),
max_features=207, threshold=-inf)_0.5_3_250_413"	6.744	1	0	1	0
20	200_SelectFromModel(estimator=XGBClassifier(base_score=None, booster=None,
callbacks=None, colsample_bylevel=None,
colsample_bynode=None,
colsample_bytree=None,
early_stopping_rounds=None,
enable_categorical=False,
eval_metric=None, feature_types=None,
gamma=None, gpu_id=None,
grow_policy=None, importance_type=None,
interaction_constraints=None,
learning_rate=0.5, max_bin=None,
max_cat_threshold=None,
max_cat_to_onehot=None,
max_delta_step=None, max_depth=3,
max_leaves=None, min_child_weight=None,
missing=nan, monotone_constraints=None,
n_estimators=100, n_jobs=None,
num_parallel_tree=None, predictor=None,
random_state=None, ...),
max_features=207, threshold=-inf)_0.5_3_100_207"	100_SelectFromModel(estimator=XGBClassifier(base_score=None, booster=None,
callbacks=None, colsample_bylevel=None,
colsample_bynode=None,
colsample_bytree=None,
early_stopping_rounds=None,
enable_categorical=False,
eval_metric=None, feature_types=None,
gamma=None, gpu_id=None,
grow_policy=None, importance_type=None,
interaction_constraints=None,
learning_rate=0.5, max_bin=None,
max_cat_threshold=None,
max_cat_to_onehot=None,
max_delta_step=None, max_depth=3,
max_leaves=None, min_child_weight=None,
missing=nan, monotone_constraints=None,
n_estimators=100, n_jobs=None,
num_parallel_tree=None, predictor=None,
random_state=None, ...),
max_features=207, threshold=-inf)_0.5_3_250_413"	7.289	1	0	1	0
21	200_SelectFromModel(estimator=XGBClassifier(base_score=None, booster=None,
callbacks=None, colsample_bylevel=None,
colsample_bynode=None,
colsample_bytree=None,
early_stopping_rounds=None,
enable_categorical=False,
eval_metric=None, feature_types=None,
gamma=None, gpu_id=None,
grow_policy=None, importance_type=None,
interaction_constraints=None,
learning_rate=0.5, max_bin=None,
max_cat_threshold=None,
max_cat_to_onehot=None,
max_delta_step=None, max_depth=3,
max_leaves=None, min_child_weight=None,
missing=nan, monotone_constraints=None,
n_estimators=100, n_jobs=None,
num_parallel_tree=None, predictor=None,
random_state=None, ...),
max_features=207, threshold=-inf)_0.5_3_100_207"	100_SelectFromModel(estimator=XGBClassifier(base_score=None, booster=None,
callbacks=None, colsample_bylevel=None,
colsample_bynode=None,
colsample_bytree=None,
early_stopping_rounds=None,
enable_categorical=False,
eval_metric=None, feature_types=None,
gamma=None, gpu_id=None,
grow_policy=None, importance_type=None,
interaction_constraints=None,
learning_rate=0.5, max_bin=None,
max_cat_threshold=None,
max_cat_to_onehot=None,
max_delta_step=None, max_depth=3,
max_leaves=None, min_child_weight=None,
missing=nan, monotone_constraints=None,
n_estimators=100, n_jobs=None,
num_parallel_tree=None, predictor=None,
random_state=None, ...),
max_features=207, threshold=-inf)_0.1_3_100_413"	2.933	1	0.003	0.978	0.019
22	200_SelectFromModel(estimator=XGBClassifier(base_score=None, booster=None,
callbacks=None, colsample_bylevel=None,
colsample_bynode=None,
colsample_bytree=None,
early_stopping_rounds=None,
enable_categorical=False,
eval_metric=None, feature_types=None,
gamma=None, gpu_id=None,
grow_policy=None, importance_type=None,
interaction_constraints=None,
learning_rate=0.5, max_bin=None,
max_cat_threshold=None,
max_cat_to_onehot=None,
max_delta_step=None, max_depth=3,
max_leaves=None, min_child_weight=None,
missing=nan, monotone_constraints=None,
n_estimators=100, n_jobs=None,
num_parallel_tree=None, predictor=None,
random_state=None, ...),
max_features=207, threshold=-inf)_0.5_3_100_207"	200_SelectFromModel(estimator=XGBClassifier(base_score=None, booster=None,
callbacks=None, colsample_bylevel=None,
colsample_bynode=None,
colsample_bytree=None,
early_stopping_rounds=None,
enable_categorical=False,
eval_metric=None, feature_types=None,
gamma=None, gpu_id=None,
grow_policy=None, importance_type=None,
interaction_constraints=None,
learning_rate=0.5, max_bin=None,
max_cat_threshold=None,
max_cat_to_onehot=None,
max_delta_step=None, max_depth=3,
max_leaves=None, min_child_weight=None,
missing=nan, monotone_constraints=None,
n_estimators=100, n_jobs=None,
num_parallel_tree=None, predictor=None,
random_state=None, ...),
max_features=207, threshold=-inf)_0.3_3_500_207"	3.676	1	0.001	0.991	0.008
23	200_SelectFromModel(estimator=XGBClassifier(base_score=None, booster=None,
callbacks=None, colsample_bylevel=None,
colsample_bynode=None,
colsample_bytree=None,
early_stopping_rounds=None,
enable_categorical=False,
eval_metric=None, feature_types=None,
gamma=None, gpu_id=None,
grow_policy=None, importance_type=None,
interaction_constraints=None,
learning_rate=0.5, max_bin=None,
max_cat_threshold=None,
max_cat_to_onehot=None,
max_delta_step=None, max_depth=3,
max_leaves=None, min_child_weight=None,
missing=nan, monotone_constraints=None,
n_estimators=100, n_jobs=None,
num_parallel_tree=None, predictor=None,
random_state=None, ...),
max_features=207, threshold=-inf)_0.5_3_100_207"	200_SelectFromModel(estimator=XGBClassifier(base_score=None, booster=None,
callbacks=None, colsample_bylevel=None,
colsample_bynode=None,
colsample_bytree=None,
early_stopping_rounds=None,
enable_categorical=False,
eval_metric=None, feature_types=None,
gamma=None, gpu_id=None,
grow_policy=None, importance_type=None,
interaction_constraints=None,
learning_rate=0.5, max_bin=None,
max_cat_threshold=None,
max_cat_to_onehot=None,
max_delta_step=None, max_depth=3,
max_leaves=None, min_child_weight=None,
missing=nan, monotone_constraints=None,
n_estimators=100, n_jobs=None,
num_parallel_tree=None, predictor=None,
random_state=None, ...),
max_features=207, threshold=-inf)_0.5_3_500_413"	6.345	1	0	1	0
24	200_SelectFromModel(estimator=XGBClassifier(base_score=None, booster=None,
callbacks=None, colsample_bylevel=None,
colsample_bynode=None,
colsample_bytree=None,
early_stopping_rounds=None,
enable_categorical=False,
eval_metric=None, feature_types=None,
gamma=None, gpu_id=None,
grow_policy=None, importance_type=None,
interaction_constraints=None,
learning_rate=0.5, max_bin=None,
max_cat_threshold=None,
max_cat_to_onehot=None,
max_delta_step=None, max_depth=3,
max_leaves=None, min_child_weight=None,
missing=nan, monotone_constraints=None,
n_estimators=100, n_jobs=None,
num_parallel_tree=None, predictor=None,
random_state=None, ...),
max_features=207, threshold=-inf)_0.5_3_100_207"	100_SelectFromModel(estimator=XGBClassifier(base_score=None, booster=None,
callbacks=None, colsample_bylevel=None,
colsample_bynode=None,
colsample_bytree=None,
early_stopping_rounds=None,
enable_categorical=False,
eval_metric=None, feature_types=None,
gamma=None, gpu_id=None,
grow_policy=None, importance_type=None,
interaction_constraints=None,
learning_rate=0.5, max_bin=None,
max_cat_threshold=None,
max_cat_to_onehot=None,
max_delta_step=None, max_depth=3,
max_leaves=None, min_child_weight=None,
missing=nan, monotone_constraints=None,
n_estimators=100, n_jobs=None,
num_parallel_tree=None, predictor=None,
random_state=None, ...),
max_features=207, threshold=-inf)_0.5_3_500_413"	6.754	1	0	1	0
25	200_SelectFromModel(estimator=XGBClassifier(base_score=None, booster=None,
callbacks=None, colsample_bylevel=None,
colsample_bynode=None,
colsample_bytree=None,
early_stopping_rounds=None,
enable_categorical=False,
eval_metric=None, feature_types=None,
gamma=None, gpu_id=None,
grow_policy=None, importance_type=None,
interaction_constraints=None,
learning_rate=0.5, max_bin=None,
max_cat_threshold=None,
max_cat_to_onehot=None,
max_delta_step=None, max_depth=3,
max_leaves=None, min_child_weight=None,
missing=nan, monotone_constraints=None,
n_estimators=100, n_jobs=None,
num_parallel_tree=None, predictor=None,
random_state=None, ...),
max_features=207, threshold=-inf)_0.5_3_100_207"	200_SelectFromModel(estimator=XGBClassifier(base_score=None, booster=None,
callbacks=None, colsample_bylevel=None,
colsample_bynode=None,
colsample_bytree=None,
early_stopping_rounds=None,
enable_categorical=False,
eval_metric=None, feature_types=None,
gamma=None, gpu_id=None,
grow_policy=None, importance_type=None,
interaction_constraints=None,
learning_rate=0.5, max_bin=None,
max_cat_threshold=None,
max_cat_to_onehot=None,
max_delta_step=None, max_depth=3,
max_leaves=None, min_child_weight=None,
missing=nan, monotone_constraints=None,
n_estimators=100, n_jobs=None,
num_parallel_tree=None, predictor=None,
random_state=None, ...),
max_features=207, threshold=-inf)_0.5_3_500_1378"	5.186	1	0	0.999	0.001
26	200_SelectFromModel(estimator=XGBClassifier(base_score=None, booster=None,
callbacks=None, colsample_bylevel=None,
colsample_bynode=None,
colsample_bytree=None,
early_stopping_rounds=None,
enable_categorical=False,
eval_metric=None, feature_types=None,
gamma=None, gpu_id=None,
grow_policy=None, importance_type=None,
interaction_constraints=None,
learning_rate=0.5, max_bin=None,
max_cat_threshold=None,
max_cat_to_onehot=None,
max_delta_step=None, max_depth=3,
max_leaves=None, min_child_weight=None,
missing=nan, monotone_constraints=None,
n_estimators=100, n_jobs=None,
num_parallel_tree=None, predictor=None,
random_state=None, ...),
max_features=207, threshold=-inf)_0.5_3_100_207"	200_SelectFromModel(estimator=XGBClassifier(base_score=None, booster=None,
callbacks=None, colsample_bylevel=None,
colsample_bynode=None,
colsample_bytree=None,
early_stopping_rounds=None,
enable_categorical=False,
eval_metric=None, feature_types=None,
gamma=None, gpu_id=None,
grow_policy=None, importance_type=None,
interaction_constraints=None,
learning_rate=0.5, max_bin=None,
max_cat_threshold=None,
max_cat_to_onehot=None,
max_delta_step=None, max_depth=3,
max_leaves=None, min_child_weight=None,
missing=nan, monotone_constraints=None,
n_estimators=100, n_jobs=None,
num_parallel_tree=None, predictor=None,
random_state=None, ...),
max_features=207, threshold=-inf)_0.1_3_100_517"	3.24	1	0.002	0.986	0.012
27	200_SelectFromModel(estimator=XGBClassifier(base_score=None, booster=None,
callbacks=None, colsample_bylevel=None,
colsample_bynode=None,
colsample_bytree=None,
early_stopping_rounds=None,
enable_categorical=False,
eval_metric=None, feature_types=None,
gamma=None, gpu_id=None,
grow_policy=None, importance_type=None,
interaction_constraints=None,
learning_rate=0.5, max_bin=None,
max_cat_threshold=None,
max_cat_to_onehot=None,
max_delta_step=None, max_depth=3,
max_leaves=None, min_child_weight=None,
missing=nan, monotone_constraints=None,
n_estimators=100, n_jobs=None,
num_parallel_tree=None, predictor=None,
random_state=None, ...),
max_features=207, threshold=-inf)_0.5_3_100_207"	100_SelectFromModel(estimator=XGBClassifier(base_score=None, booster=None,
callbacks=None, colsample_bylevel=None,
colsample_bynode=None,
colsample_bytree=None,
early_stopping_rounds=None,
enable_categorical=False,
eval_metric=None, feature_types=None,
gamma=None, gpu_id=None,
grow_policy=None, importance_type=None,
interaction_constraints=None,
learning_rate=0.5, max_bin=None,
max_cat_threshold=None,
max_cat_to_onehot=None,
max_delta_step=None, max_depth=3,
max_leaves=None, min_child_weight=None,
missing=nan, monotone_constraints=None,
n_estimators=100, n_jobs=None,
num_parallel_tree=None, predictor=None,
random_state=None, ...),
max_features=207, threshold=-inf)_0.1_3_100_517"	3.094	1	0.003	0.984	0.014
28	200_SelectFromModel(estimator=XGBClassifier(base_score=None, booster=None,
callbacks=None, colsample_bylevel=None,
colsample_bynode=None,
colsample_bytree=None,
early_stopping_rounds=None,
enable_categorical=False,
eval_metric=None, feature_types=None,
gamma=None, gpu_id=None,
grow_policy=None, importance_type=None,
interaction_constraints=None,
learning_rate=0.5, max_bin=None,
max_cat_threshold=None,
max_cat_to_onehot=None,
max_delta_step=None, max_depth=3,
max_leaves=None, min_child_weight=None,
missing=nan, monotone_constraints=None,
n_estimators=100, n_jobs=None,
num_parallel_tree=None, predictor=None,
random_state=None, ...),
max_features=207, threshold=-inf)_0.5_3_100_207"	200_SelectFromModel(estimator=XGBClassifier(base_score=None, booster=None,
callbacks=None, colsample_bylevel=None,
colsample_bynode=None,
colsample_bytree=None,
early_stopping_rounds=None,
enable_categorical=False,
eval_metric=None, feature_types=None,
gamma=None, gpu_id=None,
grow_policy=None, importance_type=None,
interaction_constraints=None,
learning_rate=0.5, max_bin=None,
max_cat_threshold=None,
max_cat_to_onehot=None,
max_delta_step=None, max_depth=3,
max_leaves=None, min_child_weight=None,
missing=nan, monotone_constraints=None,
n_estimators=100, n_jobs=None,
num_parallel_tree=None, predictor=None,
random_state=None, ...),
max_features=207, threshold=-inf)_0.5_3_250_1378"	5.342	1	0	0.999	0.001
29	200_SelectFromModel(estimator=XGBClassifier(base_score=None, booster=None,
callbacks=None, colsample_bylevel=None,
colsample_bynode=None,
colsample_bytree=None,
early_stopping_rounds=None,
enable_categorical=False,
eval_metric=None, feature_types=None,
gamma=None, gpu_id=None,
grow_policy=None, importance_type=None,
interaction_constraints=None,
learning_rate=0.5, max_bin=None,
max_cat_threshold=None,
max_cat_to_onehot=None,
max_delta_step=None, max_depth=3,
max_leaves=None, min_child_weight=None,
missing=nan, monotone_constraints=None,
n_estimators=100, n_jobs=None,
num_parallel_tree=None, predictor=None,
random_state=None, ...),
max_features=207, threshold=-inf)_0.5_3_100_207"	200_SelectFromModel(estimator=XGBClassifier(base_score=None, booster=None,
callbacks=None, colsample_bylevel=None,
colsample_bynode=None,
colsample_bytree=None,
early_stopping_rounds=None,
enable_categorical=False,
eval_metric=None, feature_types=None,
gamma=None, gpu_id=None,
grow_policy=None, importance_type=None,
interaction_constraints=None,
learning_rate=0.5, max_bin=None,
max_cat_threshold=None,
max_cat_to_onehot=None,
max_delta_step=None, max_depth=3,
max_leaves=None, min_child_weight=None,
missing=nan, monotone_constraints=None,
n_estimators=100, n_jobs=None,
num_parallel_tree=None, predictor=None,
random_state=None, ...),
max_features=207, threshold=-inf)_0.5_5_500_1378"	3.445	1	0.001	0.99	0.008
30	200_SelectFromModel(estimator=XGBClassifier(base_score=None, booster=None,
callbacks=None, colsample_bylevel=None,
colsample_bynode=None,
colsample_bytree=None,
early_stopping_rounds=None,
enable_categorical=False,
eval_metric=None, feature_types=None,
gamma=None, gpu_id=None,
grow_policy=None, importance_type=None,
interaction_constraints=None,
learning_rate=0.5, max_bin=None,
max_cat_threshold=None,
max_cat_to_onehot=None,
max_delta_step=None, max_depth=3,
max_leaves=None, min_child_weight=None,
missing=nan, monotone_constraints=None,
n_estimators=100, n_jobs=None,
num_parallel_tree=None, predictor=None,
random_state=None, ...),
max_features=207, threshold=-inf)_0.5_3_100_207"	200_SelectFromModel(estimator=XGBClassifier(base_score=None, booster=None,
callbacks=None, colsample_bylevel=None,
colsample_bynode=None,
colsample_bytree=None,
early_stopping_rounds=None,
enable_categorical=False,
eval_metric=None, feature_types=None,
gamma=None, gpu_id=None,
grow_policy=None, importance_type=None,
interaction_constraints=None,
learning_rate=0.5, max_bin=None,
max_cat_threshold=None,
max_cat_to_onehot=None,
max_delta_step=None, max_depth=3,
max_leaves=None, min_child_weight=None,
missing=nan, monotone_constraints=None,
n_estimators=100, n_jobs=None,
num_parallel_tree=None, predictor=None,
random_state=None, ...),
max_features=207, threshold=-inf)_0.3_3_100_413"	3.544	1	0.001	0.992	0.007
31	200_SelectFromModel(estimator=XGBClassifier(base_score=None, booster=None,
callbacks=None, colsample_bylevel=None,
colsample_bynode=None,
colsample_bytree=None,
early_stopping_rounds=None,
enable_categorical=False,
eval_metric=None, feature_types=None,
gamma=None, gpu_id=None,
grow_policy=None, importance_type=None,
interaction_constraints=None,
learning_rate=0.5, max_bin=None,
max_cat_threshold=None,
max_cat_to_onehot=None,
max_delta_step=None, max_depth=3,
max_leaves=None, min_child_weight=None,
missing=nan, monotone_constraints=None,
n_estimators=100, n_jobs=None,
num_parallel_tree=None, predictor=None,
random_state=None, ...),
max_features=207, threshold=-inf)_0.5_3_100_207"	200_SelectFromModel(estimator=XGBClassifier(base_score=None, booster=None,
callbacks=None, colsample_bylevel=None,
colsample_bynode=None,
colsample_bytree=None,
early_stopping_rounds=None,
enable_categorical=False,
eval_metric=None, feature_types=None,
gamma=None, gpu_id=None,
grow_policy=None, importance_type=None,
interaction_constraints=None,
learning_rate=0.5, max_bin=None,
max_cat_threshold=None,
max_cat_to_onehot=None,
max_delta_step=None, max_depth=3,
max_leaves=None, min_child_weight=None,
missing=nan, monotone_constraints=None,
n_estimators=100, n_jobs=None,
num_parallel_tree=None, predictor=None,
random_state=None, ...),
max_features=207, threshold=-inf)_0.5_5_250_1378"	3.618	1	0.001	0.992	0.006
32	200_SelectFromModel(estimator=XGBClassifier(base_score=None, booster=None,
callbacks=None, colsample_bylevel=None,
colsample_bynode=None,
colsample_bytree=None,
early_stopping_rounds=None,
enable_categorical=False,
eval_metric=None, feature_types=None,
gamma=None, gpu_id=None,
grow_policy=None, importance_type=None,
interaction_constraints=None,
learning_rate=0.5, max_bin=None,
max_cat_threshold=None,
max_cat_to_onehot=None,
max_delta_step=None, max_depth=3,
max_leaves=None, min_child_weight=None,
missing=nan, monotone_constraints=None,
n_estimators=100, n_jobs=None,
num_parallel_tree=None, predictor=None,
random_state=None, ...),
max_features=207, threshold=-inf)_0.5_3_100_207"	100_SelectFromModel(estimator=XGBClassifier(base_score=None, booster=None,
callbacks=None, colsample_bylevel=None,
colsample_bynode=None,
colsample_bytree=None,
early_stopping_rounds=None,
enable_categorical=False,
eval_metric=None, feature_types=None,
gamma=None, gpu_id=None,
grow_policy=None, importance_type=None,
interaction_constraints=None,
learning_rate=0.5, max_bin=None,
max_cat_threshold=None,
max_cat_to_onehot=None,
max_delta_step=None, max_depth=3,
max_leaves=None, min_child_weight=None,
missing=nan, monotone_constraints=None,
n_estimators=100, n_jobs=None,
num_parallel_tree=None, predictor=None,
random_state=None, ...),
max_features=207, threshold=-inf)_0.3_3_500_207"	4.07	1	0.001	0.996	0.003
33	200_SelectFromModel(estimator=XGBClassifier(base_score=None, booster=None,
callbacks=None, colsample_bylevel=None,
colsample_bynode=None,
colsample_bytree=None,
early_stopping_rounds=None,
enable_categorical=False,
eval_metric=None, feature_types=None,
gamma=None, gpu_id=None,
grow_policy=None, importance_type=None,
interaction_constraints=None,
learning_rate=0.5, max_bin=None,
max_cat_threshold=None,
max_cat_to_onehot=None,
max_delta_step=None, max_depth=3,
max_leaves=None, min_child_weight=None,
missing=nan, monotone_constraints=None,
n_estimators=100, n_jobs=None,
num_parallel_tree=None, predictor=None,
random_state=None, ...),
max_features=207, threshold=-inf)_0.5_3_100_207"	100_SelectFromModel(estimator=XGBClassifier(base_score=None, booster=None,
callbacks=None, colsample_bylevel=None,
colsample_bynode=None,
colsample_bytree=None,
early_stopping_rounds=None,
enable_categorical=False,
eval_metric=None, feature_types=None,
gamma=None, gpu_id=None,
grow_policy=None, importance_type=None,
interaction_constraints=None,
learning_rate=0.5, max_bin=None,
max_cat_threshold=None,
max_cat_to_onehot=None,
max_delta_step=None, max_depth=3,
max_leaves=None, min_child_weight=None,
missing=nan, monotone_constraints=None,
n_estimators=100, n_jobs=None,
num_parallel_tree=None, predictor=None,
random_state=None, ...),
max_features=207, threshold=-inf)_0.3_3_100_413"	3.917	1	0.001	0.995	0.004
34	200_SelectFromModel(estimator=XGBClassifier(base_score=None, booster=None,
callbacks=None, colsample_bylevel=None,
colsample_bynode=None,
colsample_bytree=None,
early_stopping_rounds=None,
enable_categorical=False,
eval_metric=None, feature_types=None,
gamma=None, gpu_id=None,
grow_policy=None, importance_type=None,
interaction_constraints=None,
learning_rate=0.5, max_bin=None,
max_cat_threshold=None,
max_cat_to_onehot=None,
max_delta_step=None, max_depth=3,
max_leaves=None, min_child_weight=None,
missing=nan, monotone_constraints=None,
n_estimators=100, n_jobs=None,
num_parallel_tree=None, predictor=None,
random_state=None, ...),
max_features=207, threshold=-inf)_0.5_3_100_207"	200_SelectFromModel(estimator=XGBClassifier(base_score=None, booster=None,
callbacks=None, colsample_bylevel=None,
colsample_bynode=None,
colsample_bytree=None,
early_stopping_rounds=None,
enable_categorical=False,
eval_metric=None, feature_types=None,
gamma=None, gpu_id=None,
grow_policy=None, importance_type=None,
interaction_constraints=None,
learning_rate=0.5, max_bin=None,
max_cat_threshold=None,
max_cat_to_onehot=None,
max_delta_step=None, max_depth=3,
max_leaves=None, min_child_weight=None,
missing=nan, monotone_constraints=None,
n_estimators=100, n_jobs=None,
num_parallel_tree=None, predictor=None,
random_state=None, ...),
max_features=207, threshold=-inf)_0.5_5_100_1378"	3.636	1	0.001	0.993	0.006
35	200_SelectFromModel(estimator=XGBClassifier(base_score=None, booster=None,
callbacks=None, colsample_bylevel=None,
colsample_bynode=None,
colsample_bytree=None,
early_stopping_rounds=None,
enable_categorical=False,
eval_metric=None, feature_types=None,
gamma=None, gpu_id=None,
grow_policy=None, importance_type=None,
interaction_constraints=None,
learning_rate=0.5, max_bin=None,
max_cat_threshold=None,
max_cat_to_onehot=None,
max_delta_step=None, max_depth=3,
max_leaves=None, min_child_weight=None,
missing=nan, monotone_constraints=None,
n_estimators=100, n_jobs=None,
num_parallel_tree=None, predictor=None,
random_state=None, ...),
max_features=207, threshold=-inf)_0.5_3_100_207"	100_SelectFromModel(estimator=XGBClassifier(base_score=None, booster=None,
callbacks=None, colsample_bylevel=None,
colsample_bynode=None,
colsample_bytree=None,
early_stopping_rounds=None,
enable_categorical=False,
eval_metric=None, feature_types=None,
gamma=None, gpu_id=None,
grow_policy=None, importance_type=None,
interaction_constraints=None,
learning_rate=0.5, max_bin=None,
max_cat_threshold=None,
max_cat_to_onehot=None,
max_delta_step=None, max_depth=3,
max_leaves=None, min_child_weight=None,
missing=nan, monotone_constraints=None,
n_estimators=100, n_jobs=None,
num_parallel_tree=None, predictor=None,
random_state=None, ...),
max_features=207, threshold=-inf)_0.3_3_250_207"	5.088	1	0	0.999	0.001
36	200_SelectFromModel(estimator=XGBClassifier(base_score=None, booster=None,
callbacks=None, colsample_bylevel=None,
colsample_bynode=None,
colsample_bytree=None,
early_stopping_rounds=None,
enable_categorical=False,
eval_metric=None, feature_types=None,
gamma=None, gpu_id=None,
grow_policy=None, importance_type=None,
interaction_constraints=None,
learning_rate=0.5, max_bin=None,
max_cat_threshold=None,
max_cat_to_onehot=None,
max_delta_step=None, max_depth=3,
max_leaves=None, min_child_weight=None,
missing=nan, monotone_constraints=None,
n_estimators=100, n_jobs=None,
num_parallel_tree=None, predictor=None,
random_state=None, ...),
max_features=207, threshold=-inf)_0.5_3_100_207"	200_SelectFromModel(estimator=XGBClassifier(base_score=None, booster=None,
callbacks=None, colsample_bylevel=None,
colsample_bynode=None,
colsample_bytree=None,
early_stopping_rounds=None,
enable_categorical=False,
eval_metric=None, feature_types=None,
gamma=None, gpu_id=None,
grow_policy=None, importance_type=None,
interaction_constraints=None,
learning_rate=0.5, max_bin=None,
max_cat_threshold=None,
max_cat_to_onehot=None,
max_delta_step=None, max_depth=3,
max_leaves=None, min_child_weight=None,
missing=nan, monotone_constraints=None,
n_estimators=100, n_jobs=None,
num_parallel_tree=None, predictor=None,
random_state=None, ...),
max_features=207, threshold=-inf)_0.5_3_500_1034"	5.196	1	0	0.999	0.001
37	200_SelectFromModel(estimator=XGBClassifier(base_score=None, booster=None,
callbacks=None, colsample_bylevel=None,
colsample_bynode=None,
colsample_bytree=None,
early_stopping_rounds=None,
enable_categorical=False,
eval_metric=None, feature_types=None,
gamma=None, gpu_id=None,
grow_policy=None, importance_type=None,
interaction_constraints=None,
learning_rate=0.5, max_bin=None,
max_cat_threshold=None,
max_cat_to_onehot=None,
max_delta_step=None, max_depth=3,
max_leaves=None, min_child_weight=None,
missing=nan, monotone_constraints=None,
n_estimators=100, n_jobs=None,
num_parallel_tree=None, predictor=None,
random_state=None, ...),
max_features=207, threshold=-inf)_0.5_3_100_207"	200_SelectFromModel(estimator=XGBClassifier(base_score=None, booster=None,
callbacks=None, colsample_bylevel=None,
colsample_bynode=None,
colsample_bytree=None,
early_stopping_rounds=None,
enable_categorical=False,
eval_metric=None, feature_types=None,
gamma=None, gpu_id=None,
grow_policy=None, importance_type=None,
interaction_constraints=None,
learning_rate=0.5, max_bin=None,
max_cat_threshold=None,
max_cat_to_onehot=None,
max_delta_step=None, max_depth=3,
max_leaves=None, min_child_weight=None,
missing=nan, monotone_constraints=None,
n_estimators=100, n_jobs=None,
num_parallel_tree=None, predictor=None,
random_state=None, ...),
max_features=207, threshold=-inf)_0.5_3_100_1378"	5.036	1	0	0.999	0.001
38	200_SelectFromModel(estimator=XGBClassifier(base_score=None, booster=None,
callbacks=None, colsample_bylevel=None,
colsample_bynode=None,
colsample_bytree=None,
early_stopping_rounds=None,
enable_categorical=False,
eval_metric=None, feature_types=None,
gamma=None, gpu_id=None,
grow_policy=None, importance_type=None,
interaction_constraints=None,
learning_rate=0.5, max_bin=None,
max_cat_threshold=None,
max_cat_to_onehot=None,
max_delta_step=None, max_depth=3,
max_leaves=None, min_child_weight=None,
missing=nan, monotone_constraints=None,
n_estimators=100, n_jobs=None,
num_parallel_tree=None, predictor=None,
random_state=None, ...),
max_features=207, threshold=-inf)_0.5_3_100_207"	200_SelectFromModel(estimator=XGBClassifier(base_score=None, booster=None,
callbacks=None, colsample_bylevel=None,
colsample_bynode=None,
colsample_bytree=None,
early_stopping_rounds=None,
enable_categorical=False,
eval_metric=None, feature_types=None,
gamma=None, gpu_id=None,
grow_policy=None, importance_type=None,
interaction_constraints=None,
learning_rate=0.5, max_bin=None,
max_cat_threshold=None,
max_cat_to_onehot=None,
max_delta_step=None, max_depth=3,
max_leaves=None, min_child_weight=None,
missing=nan, monotone_constraints=None,
n_estimators=100, n_jobs=None,
num_parallel_tree=None, predictor=None,
random_state=None, ...),
max_features=207, threshold=-inf)_0.5_3_250_1034"	5.616	1	0	0.999	0
39	200_SelectFromModel(estimator=XGBClassifier(base_score=None, booster=None,
callbacks=None, colsample_bylevel=None,
colsample_bynode=None,
colsample_bytree=None,
early_stopping_rounds=None,
enable_categorical=False,
eval_metric=None, feature_types=None,
gamma=None, gpu_id=None,
grow_policy=None, importance_type=None,
interaction_constraints=None,
learning_rate=0.5, max_bin=None,
max_cat_threshold=None,
max_cat_to_onehot=None,
max_delta_step=None, max_depth=3,
max_leaves=None, min_child_weight=None,
missing=nan, monotone_constraints=None,
n_estimators=100, n_jobs=None,
num_parallel_tree=None, predictor=None,
random_state=None, ...),
max_features=207, threshold=-inf)_0.5_3_100_207"	200_SelectFromModel(estimator=XGBClassifier(base_score=None, booster=None,
callbacks=None, colsample_bylevel=None,
colsample_bynode=None,
colsample_bytree=None,
early_stopping_rounds=None,
enable_categorical=False,
eval_metric=None, feature_types=None,
gamma=None, gpu_id=None,
grow_policy=None, importance_type=None,
interaction_constraints=None,
learning_rate=0.5, max_bin=None,
max_cat_threshold=None,
max_cat_to_onehot=None,
max_delta_step=None, max_depth=3,
max_leaves=None, min_child_weight=None,
missing=nan, monotone_constraints=None,
n_estimators=100, n_jobs=None,
num_parallel_tree=None, predictor=None,
random_state=None, ...),
max_features=207, threshold=-inf)_0.3_3_500_1378"	4.424	1	0	0.998	0.002
40	200_SelectFromModel(estimator=XGBClassifier(base_score=None, booster=None,
callbacks=None, colsample_bylevel=None,
colsample_bynode=None,
colsample_bytree=None,
early_stopping_rounds=None,
enable_categorical=False,
eval_metric=None, feature_types=None,
gamma=None, gpu_id=None,
grow_policy=None, importance_type=None,
interaction_constraints=None,
learning_rate=0.5, max_bin=None,
max_cat_threshold=None,
max_cat_to_onehot=None,
max_delta_step=None, max_depth=3,
max_leaves=None, min_child_weight=None,
missing=nan, monotone_constraints=None,
n_estimators=100, n_jobs=None,
num_parallel_tree=None, predictor=None,
random_state=None, ...),
max_features=207, threshold=-inf)_0.5_3_100_207"	200_SelectFromModel(estimator=XGBClassifier(base_score=None, booster=None,
callbacks=None, colsample_bylevel=None,
colsample_bynode=None,
colsample_bytree=None,
early_stopping_rounds=None,
enable_categorical=False,
eval_metric=None, feature_types=None,
gamma=None, gpu_id=None,
grow_policy=None, importance_type=None,
interaction_constraints=None,
learning_rate=0.5, max_bin=None,
max_cat_threshold=None,
max_cat_to_onehot=None,
max_delta_step=None, max_depth=3,
max_leaves=None, min_child_weight=None,
missing=nan, monotone_constraints=None,
n_estimators=100, n_jobs=None,
num_parallel_tree=None, predictor=None,
random_state=None, ...),
max_features=207, threshold=-inf)_0.5_3_100_1034"	6.084	1	0	1	0
41	200_SelectFromModel(estimator=XGBClassifier(base_score=None, booster=None,
callbacks=None, colsample_bylevel=None,
colsample_bynode=None,
colsample_bytree=None,
early_stopping_rounds=None,
enable_categorical=False,
eval_metric=None, feature_types=None,
gamma=None, gpu_id=None,
grow_policy=None, importance_type=None,
interaction_constraints=None,
learning_rate=0.5, max_bin=None,
max_cat_threshold=None,
max_cat_to_onehot=None,
max_delta_step=None, max_depth=3,
max_leaves=None, min_child_weight=None,
missing=nan, monotone_constraints=None,
n_estimators=100, n_jobs=None,
num_parallel_tree=None, predictor=None,
random_state=None, ...),
max_features=207, threshold=-inf)_0.5_3_100_207"	100_SelectFromModel(estimator=XGBClassifier(base_score=None, booster=None,
callbacks=None, colsample_bylevel=None,
colsample_bynode=None,
colsample_bytree=None,
early_stopping_rounds=None,
enable_categorical=False,
eval_metric=None, feature_types=None,
gamma=None, gpu_id=None,
grow_policy=None, importance_type=None,
interaction_constraints=None,
learning_rate=0.5, max_bin=None,
max_cat_threshold=None,
max_cat_to_onehot=None,
max_delta_step=None, max_depth=3,
max_leaves=None, min_child_weight=None,
missing=nan, monotone_constraints=None,
n_estimators=100, n_jobs=None,
num_parallel_tree=None, predictor=None,
random_state=None, ...),
max_features=207, threshold=-inf)_0.5_3_500_1378"	5.56	1	0	0.999	0.001
42	200_SelectFromModel(estimator=XGBClassifier(base_score=None, booster=None,
callbacks=None, colsample_bylevel=None,
colsample_bynode=None,
colsample_bytree=None,
early_stopping_rounds=None,
enable_categorical=False,
eval_metric=None, feature_types=None,
gamma=None, gpu_id=None,
grow_policy=None, importance_type=None,
interaction_constraints=None,
learning_rate=0.5, max_bin=None,
max_cat_threshold=None,
max_cat_to_onehot=None,
max_delta_step=None, max_depth=3,
max_leaves=None, min_child_weight=None,
missing=nan, monotone_constraints=None,
n_estimators=100, n_jobs=None,
num_parallel_tree=None, predictor=None,
random_state=None, ...),
max_features=207, threshold=-inf)_0.5_3_100_207"	200_SelectFromModel(estimator=XGBClassifier(base_score=None, booster=None,
callbacks=None, colsample_bylevel=None,
colsample_bynode=None,
colsample_bytree=None,
early_stopping_rounds=None,
enable_categorical=False,
eval_metric=None, feature_types=None,
gamma=None, gpu_id=None,
grow_policy=None, importance_type=None,
interaction_constraints=None,
learning_rate=0.5, max_bin=None,
max_cat_threshold=None,
max_cat_to_onehot=None,
max_delta_step=None, max_depth=3,
max_leaves=None, min_child_weight=None,
missing=nan, monotone_constraints=None,
n_estimators=100, n_jobs=None,
num_parallel_tree=None, predictor=None,
random_state=None, ...),
max_features=207, threshold=-inf)_0.1_3_500_1378"	4.504	1	0	0.998	0.002
43	200_SelectFromModel(estimator=XGBClassifier(base_score=None, booster=None,
callbacks=None, colsample_bylevel=None,
colsample_bynode=None,
colsample_bytree=None,
early_stopping_rounds=None,
enable_categorical=False,
eval_metric=None, feature_types=None,
gamma=None, gpu_id=None,
grow_policy=None, importance_type=None,
interaction_constraints=None,
learning_rate=0.5, max_bin=None,
max_cat_threshold=None,
max_cat_to_onehot=None,
max_delta_step=None, max_depth=3,
max_leaves=None, min_child_weight=None,
missing=nan, monotone_constraints=None,
n_estimators=100, n_jobs=None,
num_parallel_tree=None, predictor=None,
random_state=None, ...),
max_features=207, threshold=-inf)_0.5_3_100_207"	200_SelectFromModel(estimator=XGBClassifier(base_score=None, booster=None,
callbacks=None, colsample_bylevel=None,
colsample_bynode=None,
colsample_bytree=None,
early_stopping_rounds=None,
enable_categorical=False,
eval_metric=None, feature_types=None,
gamma=None, gpu_id=None,
grow_policy=None, importance_type=None,
interaction_constraints=None,
learning_rate=0.5, max_bin=None,
max_cat_threshold=None,
max_cat_to_onehot=None,
max_delta_step=None, max_depth=3,
max_leaves=None, min_child_weight=None,
missing=nan, monotone_constraints=None,
n_estimators=100, n_jobs=None,
num_parallel_tree=None, predictor=None,
random_state=None, ...),
max_features=207, threshold=-inf)_0.1_3_250_1378"	4.629	1	0	0.998	0.002
44	200_SelectFromModel(estimator=XGBClassifier(base_score=None, booster=None,
callbacks=None, colsample_bylevel=None,
colsample_bynode=None,
colsample_bytree=None,
early_stopping_rounds=None,
enable_categorical=False,
eval_metric=None, feature_types=None,
gamma=None, gpu_id=None,
grow_policy=None, importance_type=None,
interaction_constraints=None,
learning_rate=0.5, max_bin=None,
max_cat_threshold=None,
max_cat_to_onehot=None,
max_delta_step=None, max_depth=3,
max_leaves=None, min_child_weight=None,
missing=nan, monotone_constraints=None,
n_estimators=100, n_jobs=None,
num_parallel_tree=None, predictor=None,
random_state=None, ...),
max_features=207, threshold=-inf)_0.5_3_100_207"	200_SelectFromModel(estimator=XGBClassifier(base_score=None, booster=None,
callbacks=None, colsample_bylevel=None,
colsample_bynode=None,
colsample_bytree=None,
early_stopping_rounds=None,
enable_categorical=False,
eval_metric=None, feature_types=None,
gamma=None, gpu_id=None,
grow_policy=None, importance_type=None,
interaction_constraints=None,
learning_rate=0.5, max_bin=None,
max_cat_threshold=None,
max_cat_to_onehot=None,
max_delta_step=None, max_depth=3,
max_leaves=None, min_child_weight=None,
missing=nan, monotone_constraints=None,
n_estimators=100, n_jobs=None,
num_parallel_tree=None, predictor=None,
random_state=None, ...),
max_features=207, threshold=-inf)_0.3_3_100_1378"	4.588	1	0	0.998	0.002
45	200_SelectFromModel(estimator=XGBClassifier(base_score=None, booster=None,
callbacks=None, colsample_bylevel=None,
colsample_bynode=None,
colsample_bytree=None,
early_stopping_rounds=None,
enable_categorical=False,
eval_metric=None, feature_types=None,
gamma=None, gpu_id=None,
grow_policy=None, importance_type=None,
interaction_constraints=None,
learning_rate=0.5, max_bin=None,
max_cat_threshold=None,
max_cat_to_onehot=None,
max_delta_step=None, max_depth=3,
max_leaves=None, min_child_weight=None,
missing=nan, monotone_constraints=None,
n_estimators=100, n_jobs=None,
num_parallel_tree=None, predictor=None,
random_state=None, ...),
max_features=207, threshold=-inf)_0.5_3_100_207"	200_SelectFromModel(estimator=XGBClassifier(base_score=None, booster=None,
callbacks=None, colsample_bylevel=None,
colsample_bynode=None,
colsample_bytree=None,
early_stopping_rounds=None,
enable_categorical=False,
eval_metric=None, feature_types=None,
gamma=None, gpu_id=None,
grow_policy=None, importance_type=None,
interaction_constraints=None,
learning_rate=0.5, max_bin=None,
max_cat_threshold=None,
max_cat_to_onehot=None,
max_delta_step=None, max_depth=3,
max_leaves=None, min_child_weight=None,
missing=nan, monotone_constraints=None,
n_estimators=100, n_jobs=None,
num_parallel_tree=None, predictor=None,
random_state=None, ...),
max_features=207, threshold=-inf)_0.3_3_100_517"	4.835	1	0	0.999	0.001
46	200_SelectFromModel(estimator=XGBClassifier(base_score=None, booster=None,
callbacks=None, colsample_bylevel=None,
colsample_bynode=None,
colsample_bytree=None,
early_stopping_rounds=None,
enable_categorical=False,
eval_metric=None, feature_types=None,
gamma=None, gpu_id=None,
grow_policy=None, importance_type=None,
interaction_constraints=None,
learning_rate=0.5, max_bin=None,
max_cat_threshold=None,
max_cat_to_onehot=None,
max_delta_step=None, max_depth=3,
max_leaves=None, min_child_weight=None,
missing=nan, monotone_constraints=None,
n_estimators=100, n_jobs=None,
num_parallel_tree=None, predictor=None,
random_state=None, ...),
max_features=207, threshold=-inf)_0.5_3_100_207"	200_SelectFromModel(estimator=XGBClassifier(base_score=None, booster=None,
callbacks=None, colsample_bylevel=None,
colsample_bynode=None,
colsample_bytree=None,
early_stopping_rounds=None,
enable_categorical=False,
eval_metric=None, feature_types=None,
gamma=None, gpu_id=None,
grow_policy=None, importance_type=None,
interaction_constraints=None,
learning_rate=0.5, max_bin=None,
max_cat_threshold=None,
max_cat_to_onehot=None,
max_delta_step=None, max_depth=3,
max_leaves=None, min_child_weight=None,
missing=nan, monotone_constraints=None,
n_estimators=100, n_jobs=None,
num_parallel_tree=None, predictor=None,
random_state=None, ...),
max_features=207, threshold=-inf)_0.3_5_500_1378"	4.641	1	0	0.998	0.002
47	200_SelectFromModel(estimator=XGBClassifier(base_score=None, booster=None,
callbacks=None, colsample_bylevel=None,
colsample_bynode=None,
colsample_bytree=None,
early_stopping_rounds=None,
enable_categorical=False,
eval_metric=None, feature_types=None,
gamma=None, gpu_id=None,
grow_policy=None, importance_type=None,
interaction_constraints=None,
learning_rate=0.5, max_bin=None,
max_cat_threshold=None,
max_cat_to_onehot=None,
max_delta_step=None, max_depth=3,
max_leaves=None, min_child_weight=None,
missing=nan, monotone_constraints=None,
n_estimators=100, n_jobs=None,
num_parallel_tree=None, predictor=None,
random_state=None, ...),
max_features=207, threshold=-inf)_0.5_3_100_207"	10_SelectFromModel(estimator=XGBClassifier(base_score=None, booster=None,
callbacks=None, colsample_bylevel=None,
colsample_bynode=None,
colsample_bytree=None,
early_stopping_rounds=None,
enable_categorical=False,
eval_metric=None, feature_types=None,
gamma=None, gpu_id=None,
grow_policy=None, importance_type=None,
interaction_constraints=None,
learning_rate=0.5, max_bin=None,
max_cat_threshold=None,
max_cat_to_onehot=None,
max_delta_step=None, max_depth=3,
max_leaves=None, min_child_weight=None,
missing=nan, monotone_constraints=None,
n_estimators=100, n_jobs=None,
num_parallel_tree=None, predictor=None,
random_state=None, ...),
max_features=207, threshold=-inf)_0.5_3_100_517"	5.893	1	0	1	0
48	200_SelectFromModel(estimator=XGBClassifier(base_score=None, booster=None,
callbacks=None, colsample_bylevel=None,
colsample_bynode=None,
colsample_bytree=None,
early_stopping_rounds=None,
enable_categorical=False,
eval_metric=None, feature_types=None,
gamma=None, gpu_id=None,
grow_policy=None, importance_type=None,
interaction_constraints=None,
learning_rate=0.5, max_bin=None,
max_cat_threshold=None,
max_cat_to_onehot=None,
max_delta_step=None, max_depth=3,
max_leaves=None, min_child_weight=None,
missing=nan, monotone_constraints=None,
n_estimators=100, n_jobs=None,
num_parallel_tree=None, predictor=None,
random_state=None, ...),
max_features=207, threshold=-inf)_0.5_3_100_207"	200_SelectFromModel(estimator=XGBClassifier(base_score=None, booster=None,
callbacks=None, colsample_bylevel=None,
colsample_bynode=None,
colsample_bytree=None,
early_stopping_rounds=None,
enable_categorical=False,
eval_metric=None, feature_types=None,
gamma=None, gpu_id=None,
grow_policy=None, importance_type=None,
interaction_constraints=None,
learning_rate=0.5, max_bin=None,
max_cat_threshold=None,
max_cat_to_onehot=None,
max_delta_step=None, max_depth=3,
max_leaves=None, min_child_weight=None,
missing=nan, monotone_constraints=None,
n_estimators=100, n_jobs=None,
num_parallel_tree=None, predictor=None,
random_state=None, ...),
max_features=207, threshold=-inf)_0.3_3_250_1378"	4.011	1	0.001	0.996	0.003
49	200_SelectFromModel(estimator=XGBClassifier(base_score=None, booster=None,
callbacks=None, colsample_bylevel=None,
colsample_bynode=None,
colsample_bytree=None,
early_stopping_rounds=None,
enable_categorical=False,
eval_metric=None, feature_types=None,
gamma=None, gpu_id=None,
grow_policy=None, importance_type=None,
interaction_constraints=None,
learning_rate=0.5, max_bin=None,
max_cat_threshold=None,
max_cat_to_onehot=None,
max_delta_step=None, max_depth=3,
max_leaves=None, min_child_weight=None,
missing=nan, monotone_constraints=None,
n_estimators=100, n_jobs=None,
num_parallel_tree=None, predictor=None,
random_state=None, ...),
max_features=207, threshold=-inf)_0.5_3_100_207"	100_SelectFromModel(estimator=XGBClassifier(base_score=None, booster=None,
callbacks=None, colsample_bylevel=None,
colsample_bynode=None,
colsample_bytree=None,
early_stopping_rounds=None,
enable_categorical=False,
eval_metric=None, feature_types=None,
gamma=None, gpu_id=None,
grow_policy=None, importance_type=None,
interaction_constraints=None,
learning_rate=0.5, max_bin=None,
max_cat_threshold=None,
max_cat_to_onehot=None,
max_delta_step=None, max_depth=3,
max_leaves=None, min_child_weight=None,
missing=nan, monotone_constraints=None,
n_estimators=100, n_jobs=None,
num_parallel_tree=None, predictor=None,
random_state=None, ...),
max_features=207, threshold=-inf)_0.3_3_100_517"	4.849	1	0	0.999	0.001
50	200_SelectFromModel(estimator=XGBClassifier(base_score=None, booster=None,
callbacks=None, colsample_bylevel=None,
colsample_bynode=None,
colsample_bytree=None,
early_stopping_rounds=None,
enable_categorical=False,
eval_metric=None, feature_types=None,
gamma=None, gpu_id=None,
grow_policy=None, importance_type=None,
interaction_constraints=None,
learning_rate=0.5, max_bin=None,
max_cat_threshold=None,
max_cat_to_onehot=None,
max_delta_step=None, max_depth=3,
max_leaves=None, min_child_weight=None,
missing=nan, monotone_constraints=None,
n_estimators=100, n_jobs=None,
num_parallel_tree=None, predictor=None,
random_state=None, ...),
max_features=207, threshold=-inf)_0.5_3_100_207"	200_SelectFromModel(estimator=XGBClassifier(base_score=None, booster=None,
callbacks=None, colsample_bylevel=None,
colsample_bynode=None,
colsample_bytree=None,
early_stopping_rounds=None,
enable_categorical=False,
eval_metric=None, feature_types=None,
gamma=None, gpu_id=None,
grow_policy=None, importance_type=None,
interaction_constraints=None,
learning_rate=0.5, max_bin=None,
max_cat_threshold=None,
max_cat_to_onehot=None,
max_delta_step=None, max_depth=3,
max_leaves=None, min_child_weight=None,
missing=nan, monotone_constraints=None,
n_estimators=100, n_jobs=None,
num_parallel_tree=None, predictor=None,
random_state=None, ...),
max_features=207, threshold=-inf)_0.3_5_250_1378"	5.402	1	0	0.999	0.001
51	200_SelectFromModel(estimator=XGBClassifier(base_score=None, booster=None,
callbacks=None, colsample_bylevel=None,
colsample_bynode=None,
colsample_bytree=None,
early_stopping_rounds=None,
enable_categorical=False,
eval_metric=None, feature_types=None,
gamma=None, gpu_id=None,
grow_policy=None, importance_type=None,
interaction_constraints=None,
[truncated: 1,046,576+ more rows]

## Sheet: XGBoost_SVC_Amodels_cross-valid
kernel	params	rank_test_score	mean_test_score	std_test_score
200_SelectFromModel(estimator=XGBClassifier(base_score=None, booster=None,
callbacks=None, colsample_bylevel=None,
colsample_bynode=None,
colsample_bytree=None,
early_stopping_rounds=None,
enable_categorical=False,
eval_metric=None, feature_types=None,
gamma=None, gpu_id=None,
grow_policy=None, importance_type=None,
interaction_constraints=None,
learning_rate=0.5, max_bin=None,
max_cat_threshold=None,
max_cat_to_onehot=None,
max_delta_step=None, max_depth=3,
max_leaves=None, min_child_weight=None,
missing=nan, monotone_constraints=None,
n_estimators=100, n_jobs=None,
num_parallel_tree=None, predictor=None,
random_state=None, ...),
max_features=207, threshold=-inf)_0.5_3_100_207"	{'classify__C': 200, 'feature_selection': SelectFromModel(estimator=XGBClassifier(base_score=None, booster=None,
callbacks=None, colsample_bylevel=None,
colsample_bynode=None,
colsample_bytree=None,
early_stopping_rounds=None,
enable_categorical=False,
eval_metric=None, feature_types=None,
gamma=None, gpu_id=None,
grow_policy=None, importance_type=None,
interaction_constraints=None,
learning_rate=0.5, max_bin=None,
max_cat_threshold=None,
max_cat_to_onehot=None,
max_delta_step=None, max_depth=3,
max_leaves=None, min_child_weight=None,
missing=nan, monotone_constraints=None,
n_estimators=100, n_jobs=None,
num_parallel_tree=None, predictor=None,
random_state=None, ...),
max_features=207, threshold=-inf), 'feature_selection__estimator__learning_rate': 0.5, 'feature_selection__estimator__max_depth': 3, 'feature_selection__estimator__n_estimators': 100, 'feature_selection__max_features': 207}"	1	0.769805	0.0498203
200_SelectFromModel(estimator=XGBClassifier(base_score=None, booster=None,
callbacks=None, colsample_bylevel=None,
colsample_bynode=None,
colsample_bytree=None,
early_stopping_rounds=None,
enable_categorical=False,
eval_metric=None, feature_types=None,
gamma=None, gpu_id=None,
grow_policy=None, importance_type=None,
interaction_constraints=None,
learning_rate=0.5, max_bin=None,
max_cat_threshold=None,
max_cat_to_onehot=None,
max_delta_step=None, max_depth=3,
max_leaves=None, min_child_weight=None,
missing=nan, monotone_constraints=None,
n_estimators=100, n_jobs=None,
num_parallel_tree=None, predictor=None,
random_state=None, ...),
max_features=207, threshold=-inf)_0.3_3_100_207"	{'classify__C': 200, 'feature_selection': SelectFromModel(estimator=XGBClassifier(base_score=None, booster=None,
callbacks=None, colsample_bylevel=None,
colsample_bynode=None,
colsample_bytree=None,
early_stopping_rounds=None,
enable_categorical=False,
eval_metric=None, feature_types=None,
gamma=None, gpu_id=None,
grow_policy=None, importance_type=None,
interaction_constraints=None,
learning_rate=0.5, max_bin=None,
max_cat_threshold=None,
max_cat_to_onehot=None,
max_delta_step=None, max_depth=3,
max_leaves=None, min_child_weight=None,
missing=nan, monotone_constraints=None,
n_estimators=100, n_jobs=None,
num_parallel_tree=None, predictor=None,
random_state=None, ...),
max_features=207, threshold=-inf), 'feature_selection__estimator__learning_rate': 0.3, 'feature_selection__estimator__max_depth': 3, 'feature_selection__estimator__n_estimators': 100, 'feature_selection__max_features': 207}"	2	0.765637	0.0434708
100_SelectFromModel(estimator=XGBClassifier(base_score=None, booster=None,
callbacks=None, colsample_bylevel=None,
colsample_bynode=None,
colsample_bytree=None,
early_stopping_rounds=None,
enable_categorical=False,
eval_metric=None, feature_types=None,
gamma=None, gpu_id=None,
grow_policy=None, importance_type=None,
interaction_constraints=None,
learning_rate=0.5, max_bin=None,
max_cat_threshold=None,
max_cat_to_onehot=None,
max_delta_step=None, max_depth=3,
max_leaves=None, min_child_weight=None,
missing=nan, monotone_constraints=None,
n_estimators=100, n_jobs=None,
num_parallel_tree=None, predictor=None,
random_state=None, ...),
max_features=207, threshold=-inf)_0.5_3_100_207"	{'classify__C': 100, 'feature_selection': SelectFromModel(estimator=XGBClassifier(base_score=None, booster=None,
callbacks=None, colsample_bylevel=None,
colsample_bynode=None,
colsample_bytree=None,
early_stopping_rounds=None,
enable_categorical=False,
eval_metric=None, feature_types=None,
gamma=None, gpu_id=None,
grow_policy=None, importance_type=None,
interaction_constraints=None,
learning_rate=0.5, max_bin=None,
max_cat_threshold=None,
max_cat_to_onehot=None,
max_delta_step=None, max_depth=3,
max_leaves=None, min_child_weight=None,
missing=nan, monotone_constraints=None,
n_estimators=100, n_jobs=None,
num_parallel_tree=None, predictor=None,
random_state=None, ...),
max_features=207, threshold=-inf), 'feature_selection__estimator__learning_rate': 0.5, 'feature_selection__estimator__max_depth': 3, 'feature_selection__estimator__n_estimators': 100, 'feature_selection__max_features': 207}"	3	0.763088	0.0453913
100_SelectFromModel(estimator=XGBClassifier(base_score=None, booster=None,
callbacks=None, colsample_bylevel=None,
colsample_bynode=None,
colsample_bytree=None,
early_stopping_rounds=None,
enable_categorical=False,
eval_metric=None, feature_types=None,
gamma=None, gpu_id=None,
grow_policy=None, importance_type=None,
interaction_constraints=None,
learning_rate=0.5, max_bin=None,
max_cat_threshold=None,
max_cat_to_onehot=None,
max_delta_step=None, max_depth=3,
max_leaves=None, min_child_weight=None,
missing=nan, monotone_constraints=None,
n_estimators=100, n_jobs=None,
num_parallel_tree=None, predictor=None,
random_state=None, ...),
max_features=207, threshold=-inf)_0.3_3_100_207"	{'classify__C': 100, 'feature_selection': SelectFromModel(estimator=XGBClassifier(base_score=None, booster=None,
callbacks=None, colsample_bylevel=None,
colsample_bynode=None,
colsample_bytree=None,
early_stopping_rounds=None,
enable_categorical=False,
eval_metric=None, feature_types=None,
gamma=None, gpu_id=None,
grow_policy=None, importance_type=None,
interaction_constraints=None,
learning_rate=0.5, max_bin=None,
max_cat_threshold=None,
max_cat_to_onehot=None,
max_delta_step=None, max_depth=3,
max_leaves=None, min_child_weight=None,
missing=nan, monotone_constraints=None,
n_estimators=100, n_jobs=None,
num_parallel_tree=None, predictor=None,
random_state=None, ...),
max_features=207, threshold=-inf), 'feature_selection__estimator__learning_rate': 0.3, 'feature_selection__estimator__max_depth': 3, 'feature_selection__estimator__n_estimators': 100, 'feature_selection__max_features': 207}"	4	0.752855	0.0369163
200_SelectFromModel(estimator=XGBClassifier(base_score=None, booster=None,
callbacks=None, colsample_bylevel=None,
colsample_bynode=None,
colsample_bytree=None,
early_stopping_rounds=None,
enable_categorical=False,
eval_metric=None, feature_types=None,
gamma=None, gpu_id=None,
grow_policy=None, importance_type=None,
interaction_constraints=None,
learning_rate=0.5, max_bin=None,
max_cat_threshold=None,
max_cat_to_onehot=None,
max_delta_step=None, max_depth=3,
max_leaves=None, min_child_weight=None,
missing=nan, monotone_constraints=None,
n_estimators=100, n_jobs=None,
num_parallel_tree=None, predictor=None,
random_state=None, ...),
max_features=207, threshold=-inf)_0.5_3_250_207"	{'classify__C': 200, 'feature_selection': SelectFromModel(estimator=XGBClassifier(base_score=None, booster=None,
callbacks=None, colsample_bylevel=None,
colsample_bynode=None,
colsample_bytree=None,
early_stopping_rounds=None,
enable_categorical=False,
eval_metric=None, feature_types=None,
gamma=None, gpu_id=None,
grow_policy=None, importance_type=None,
interaction_constraints=None,
learning_rate=0.5, max_bin=None,
max_cat_threshold=None,
max_cat_to_onehot=None,
max_delta_step=None, max_depth=3,
max_leaves=None, min_child_weight=None,
missing=nan, monotone_constraints=None,
n_estimators=100, n_jobs=None,
num_parallel_tree=None, predictor=None,
random_state=None, ...),
max_features=207, threshold=-inf), 'feature_selection__estimator__learning_rate': 0.5, 'feature_selection__estimator__max_depth': 3, 'feature_selection__estimator__n_estimators': 250, 'feature_selection__max_features': 207}"	5	0.749553	0.0497855
100_SelectFromModel(estimator=XGBClassifier(base_score=None, booster=None,
callbacks=None, colsample_bylevel=None,
colsample_bynode=None,
colsample_bytree=None,
early_stopping_rounds=None,
enable_categorical=False,
eval_metric=None, feature_types=None,
gamma=None, gpu_id=None,
grow_policy=None, importance_type=None,
interaction_constraints=None,
learning_rate=0.5, max_bin=None,
max_cat_threshold=None,
max_cat_to_onehot=None,
max_delta_step=None, max_depth=3,
max_leaves=None, min_child_weight=None,
missing=nan, monotone_constraints=None,
n_estimators=100, n_jobs=None,
num_parallel_tree=None, predictor=None,
random_state=None, ...),
max_features=207, threshold=-inf)_0.5_3_250_207"	{'classify__C': 100, 'feature_selection': SelectFromModel(estimator=XGBClassifier(base_score=None, booster=None,
callbacks=None, colsample_bylevel=None,
colsample_bynode=None,
colsample_bytree=None,
early_stopping_rounds=None,
enable_categorical=False,
eval_metric=None, feature_types=None,
gamma=None, gpu_id=None,
grow_policy=None, importance_type=None,
interaction_constraints=None,
learning_rate=0.5, max_bin=None,
max_cat_threshold=None,
max_cat_to_onehot=None,
max_delta_step=None, max_depth=3,
max_leaves=None, min_child_weight=None,
missing=nan, monotone_constraints=None,
n_estimators=100, n_jobs=None,
num_parallel_tree=None, predictor=None,
random_state=None, ...),
max_features=207, threshold=-inf), 'feature_selection__estimator__learning_rate': 0.5, 'feature_selection__estimator__max_depth': 3, 'feature_selection__estimator__n_estimators': 250, 'feature_selection__max_features': 207}"	6	0.743302	0.039468
200_SelectFromModel(estimator=XGBClassifier(base_score=None, booster=None,
callbacks=None, colsample_bylevel=None,
colsample_bynode=None,
colsample_bytree=None,
early_stopping_rounds=None,
enable_categorical=False,
eval_metric=None, feature_types=None,
gamma=None, gpu_id=None,
grow_policy=None, importance_type=None,
interaction_constraints=None,
learning_rate=0.5, max_bin=None,
max_cat_threshold=None,
max_cat_to_onehot=None,
max_delta_step=None, max_depth=3,
max_leaves=None, min_child_weight=None,
missing=nan, monotone_constraints=None,
n_estimators=100, n_jobs=None,
num_parallel_tree=None, predictor=None,
random_state=None, ...),
max_features=207, threshold=-inf)_0.5_3_500_207"	{'classify__C': 200, 'feature_selection': SelectFromModel(estimator=XGBClassifier(base_score=None, booster=None,
callbacks=None, colsample_bylevel=None,
colsample_bynode=None,
colsample_bytree=None,
early_stopping_rounds=None,
enable_categorical=False,
eval_metric=None, feature_types=None,
gamma=None, gpu_id=None,
grow_policy=None, importance_type=None,
interaction_constraints=None,
learning_rate=0.5, max_bin=None,
max_cat_threshold=None,
max_cat_to_onehot=None,
max_delta_step=None, max_depth=3,
max_leaves=None, min_child_weight=None,
missing=nan, monotone_constraints=None,
n_estimators=100, n_jobs=None,
num_parallel_tree=None, predictor=None,
random_state=None, ...),
max_features=207, threshold=-inf), 'feature_selection__estimator__learning_rate': 0.5, 'feature_selection__estimator__max_depth': 3, 'feature_selection__estimator__n_estimators': 500, 'feature_selection__max_features': 207}"	7	0.741957	0.0453674
200_SelectFromModel(estimator=XGBClassifier(base_score=None, booster=None,
callbacks=None, colsample_bylevel=None,
colsample_bynode=None,
colsample_bytree=None,
early_stopping_rounds=None,
enable_categorical=False,
eval_metric=None, feature_types=None,
gamma=None, gpu_id=None,
grow_policy=None, importance_type=None,
interaction_constraints=None,
learning_rate=0.5, max_bin=None,
max_cat_threshold=None,
max_cat_to_onehot=None,
max_delta_step=None, max_depth=3,
max_leaves=None, min_child_weight=None,
missing=nan, monotone_constraints=None,
n_estimators=100, n_jobs=None,
num_parallel_tree=None, predictor=None,
random_state=None, ...),
max_features=207, threshold=-inf)_0.5_3_100_413"	{'classify__C': 200, 'feature_selection': SelectFromModel(estimator=XGBClassifier(base_score=None, booster=None,
callbacks=None, colsample_bylevel=None,
colsample_bynode=None,
colsample_bytree=None,
early_stopping_rounds=None,
enable_categorical=False,
eval_metric=None, feature_types=None,
gamma=None, gpu_id=None,
grow_policy=None, importance_type=None,
interaction_constraints=None,
learning_rate=0.5, max_bin=None,
max_cat_threshold=None,
max_cat_to_onehot=None,
max_delta_step=None, max_depth=3,
max_leaves=None, min_child_weight=None,
missing=nan, monotone_constraints=None,
n_estimators=100, n_jobs=None,
num_parallel_tree=None, predictor=None,
random_state=None, ...),
max_features=207, threshold=-inf), 'feature_selection__estimator__learning_rate': 0.5, 'feature_selection__estimator__max_depth': 3, 'feature_selection__estimator__n_estimators': 100, 'feature_selection__max_features': 413}"	8	0.738656	0.0474101
200_SelectFromModel(estimator=XGBClassifier(base_score=None, booster=None,
callbacks=None, colsample_bylevel=None,
colsample_bynode=None,
colsample_bytree=None,
early_stopping_rounds=None,
enable_categorical=False,
eval_metric=None, feature_types=None,
gamma=None, gpu_id=None,
grow_policy=None, importance_type=None,
interaction_constraints=None,
learning_rate=0.5, max_bin=None,
max_cat_threshold=None,
max_cat_to_onehot=None,
max_delta_step=None, max_depth=3,
max_leaves=None, min_child_weight=None,
missing=nan, monotone_constraints=None,
n_estimators=100, n_jobs=None,
num_parallel_tree=None, predictor=None,
random_state=None, ...),
max_features=207, threshold=-inf)_0.1_3_100_207"	{'classify__C': 200, 'feature_selection': SelectFromModel(estimator=XGBClassifier(base_score=None, booster=None,
callbacks=None, colsample_bylevel=None,
colsample_bynode=None,
colsample_bytree=None,
early_stopping_rounds=None,
enable_categorical=False,
eval_metric=None, feature_types=None,
gamma=None, gpu_id=None,
grow_policy=None, importance_type=None,
interaction_constraints=None,
learning_rate=0.5, max_bin=None,
max_cat_threshold=None,
max_cat_to_onehot=None,
max_delta_step=None, max_depth=3,
max_leaves=None, min_child_weight=None,
missing=nan, monotone_constraints=None,
n_estimators=100, n_jobs=None,
num_parallel_tree=None, predictor=None,
random_state=None, ...),
max_features=207, threshold=-inf), 'feature_selection__estimator__learning_rate': 0.1, 'feature_selection__estimator__max_depth': 3, 'feature_selection__estimator__n_estimators': 100, 'feature_selection__max_features': 207}"	9	0.738438	0.0307217
200_SelectFromModel(estimator=XGBClassifier(base_score=None, booster=None,
callbacks=None, colsample_bylevel=None,
colsample_bynode=None,
colsample_bytree=None,
early_stopping_rounds=None,
enable_categorical=False,
eval_metric=None, feature_types=None,
gamma=None, gpu_id=None,
grow_policy=None, importance_type=None,
interaction_constraints=None,
learning_rate=0.5, max_bin=None,
max_cat_threshold=None,
max_cat_to_onehot=None,
max_delta_step=None, max_depth=3,
max_leaves=None, min_child_weight=None,
missing=nan, monotone_constraints=None,
n_estimators=100, n_jobs=None,
num_parallel_tree=None, predictor=None,
random_state=None, ...),
max_features=207, threshold=-inf)_0.5_3_100_517"	{'classify__C': 200, 'feature_selection': SelectFromModel(estimator=XGBClassifier(base_score=None, booster=None,
callbacks=None, colsample_bylevel=None,
colsample_bynode=None,
colsample_bytree=None,
early_stopping_rounds=None,
enable_categorical=False,
eval_metric=None, feature_types=None,
gamma=None, gpu_id=None,
grow_policy=None, importance_type=None,
interaction_constraints=None,
learning_rate=0.5, max_bin=None,
max_cat_threshold=None,
max_cat_to_onehot=None,
max_delta_step=None, max_depth=3,
max_leaves=None, min_child_weight=None,
missing=nan, monotone_constraints=None,
n_estimators=100, n_jobs=None,
num_parallel_tree=None, predictor=None,
random_state=None, ...),
max_features=207, threshold=-inf), 'feature_selection__estimator__learning_rate': 0.5, 'feature_selection__estimator__max_depth': 3, 'feature_selection__estimator__n_estimators': 100, 'feature_selection__max_features': 517}"	10	0.73724	0.0520435
100_SelectFromModel(estimator=XGBClassifier(base_score=None, booster=None,
callbacks=None, colsample_bylevel=None,
colsample_bynode=None,
colsample_bytree=None,
early_stopping_rounds=None,
enable_categorical=False,
eval_metric=None, feature_types=None,
gamma=None, gpu_id=None,
grow_policy=None, importance_type=None,
interaction_constraints=None,
learning_rate=0.5, max_bin=None,
max_cat_threshold=None,
max_cat_to_onehot=None,
max_delta_step=None, max_depth=3,
max_leaves=None, min_child_weight=None,
missing=nan, monotone_constraints=None,
n_estimators=100, n_jobs=None,
num_parallel_tree=None, predictor=None,
random_state=None, ...),
max_features=207, threshold=-inf)_0.5_3_500_207"	{'classify__C': 100, 'feature_selection': SelectFromModel(estimator=XGBClassifier(base_score=None, booster=None,
callbacks=None, colsample_bylevel=None,
colsample_bynode=None,
colsample_bytree=None,
early_stopping_rounds=None,
enable_categorical=False,
eval_metric=None, feature_types=None,
gamma=None, gpu_id=None,
grow_policy=None, importance_type=None,
interaction_constraints=None,
learning_rate=0.5, max_bin=None,
max_cat_threshold=None,
max_cat_to_onehot=None,
max_delta_step=None, max_depth=3,
max_leaves=None, min_child_weight=None,
missing=nan, monotone_constraints=None,
n_estimators=100, n_jobs=None,
num_parallel_tree=None, predictor=None,
random_state=None, ...),
max_features=207, threshold=-inf), 'feature_selection__estimator__learning_rate': 0.5, 'feature_selection__estimator__max_depth': 3, 'feature_selection__estimator__n_estimators': 500, 'feature_selection__max_features': 207}"	11	0.736392	0.0382398
100_SelectFromModel(estimator=XGBClassifier(base_score=None, booster=None,
callbacks=None, colsample_bylevel=None,
colsample_bynode=None,
colsample_bytree=None,
early_stopping_rounds=None,
enable_categorical=False,
eval_metric=None, feature_types=None,
gamma=None, gpu_id=None,
grow_policy=None, importance_type=None,
interaction_constraints=None,
learning_rate=0.5, max_bin=None,
max_cat_threshold=None,
max_cat_to_onehot=None,
max_delta_step=None, max_depth=3,
max_leaves=None, min_child_weight=None,
missing=nan, monotone_constraints=None,
n_estimators=100, n_jobs=None,
num_parallel_tree=None, predictor=None,
random_state=None, ...),
max_features=207, threshold=-inf)_0.5_3_100_413"	{'classify__C': 100, 'feature_selection': SelectFromModel(estimator=XGBClassifier(base_score=None, booster=None,
callbacks=None, colsample_bylevel=None,
colsample_bynode=None,
colsample_bytree=None,
early_stopping_rounds=None,
enable_categorical=False,
eval_metric=None, feature_types=None,
gamma=None, gpu_id=None,
grow_policy=None, importance_type=None,
interaction_constraints=None,
learning_rate=0.5, max_bin=None,
max_cat_threshold=None,
max_cat_to_onehot=None,
max_delta_step=None, max_depth=3,
max_leaves=None, min_child_weight=None,
missing=nan, monotone_constraints=None,
n_estimators=100, n_jobs=None,
num_parallel_tree=None, predictor=None,
random_state=None, ...),
max_features=207, threshold=-inf), 'feature_selection__estimator__learning_rate': 0.5, 'feature_selection__estimator__max_depth': 3, 'feature_selection__estimator__n_estimators': 100, 'feature_selection__max_features': 413}"	12	0.734687	0.0426321
100_SelectFromModel(estimator=XGBClassifier(base_score=None, booster=None,
callbacks=None, colsample_bylevel=None,
colsample_bynode=None,
colsample_bytree=None,
early_stopping_rounds=None,
enable_categorical=False,
eval_metric=None, feature_types=None,
gamma=None, gpu_id=None,
grow_policy=None, importance_type=None,
interaction_constraints=None,
learning_rate=0.5, max_bin=None,
max_cat_threshold=None,
max_cat_to_onehot=None,
max_delta_step=None, max_depth=3,
max_leaves=None, min_child_weight=None,
missing=nan, monotone_constraints=None,
n_estimators=100, n_jobs=None,
num_parallel_tree=None, predictor=None,
random_state=None, ...),
max_features=207, threshold=-inf)_0.5_3_100_517"	{'classify__C': 100, 'feature_selection': SelectFromModel(estimator=XGBClassifier(base_score=None, booster=None,
callbacks=None, colsample_bylevel=None,
colsample_bynode=None,
colsample_bytree=None,
early_stopping_rounds=None,
enable_categorical=False,
eval_metric=None, feature_types=None,
gamma=None, gpu_id=None,
grow_policy=None, importance_type=None,
interaction_constraints=None,
learning_rate=0.5, max_bin=None,
max_cat_threshold=None,
max_cat_to_onehot=None,
max_delta_step=None, max_depth=3,
max_leaves=None, min_child_weight=None,
missing=nan, monotone_constraints=None,
n_estimators=100, n_jobs=None,
num_parallel_tree=None, predictor=None,
random_state=None, ...),
max_features=207, threshold=-inf), 'feature_selection__estimator__learning_rate': 0.5, 'feature_selection__estimator__max_depth': 3, 'feature_selection__estimator__n_estimators': 100, 'feature_selection__max_features': 517}"	13	0.732867	0.0491619
200_SelectFromModel(estimator=XGBClassifier(base_score=None, booster=None,
callbacks=None, colsample_bylevel=None,
colsample_bynode=None,
colsample_bytree=None,
early_stopping_rounds=None,
enable_categorical=False,
eval_metric=None, feature_types=None,
gamma=None, gpu_id=None,
grow_policy=None, importance_type=None,
interaction_constraints=None,
learning_rate=0.5, max_bin=None,
max_cat_threshold=None,
max_cat_to_onehot=None,
max_delta_step=None, max_depth=3,
max_leaves=None, min_child_weight=None,
missing=nan, monotone_constraints=None,
n_estimators=100, n_jobs=None,
num_parallel_tree=None, predictor=None,
random_state=None, ...),
max_features=207, threshold=-inf)_0.1_3_100_413"	{'classify__C': 200, 'feature_selection': SelectFromModel(estimator=XGBClassifier(base_score=None, booster=None,
callbacks=None, colsample_bylevel=None,
colsample_bynode=None,
colsample_bytree=None,
early_stopping_rounds=None,
enable_categorical=False,
eval_metric=None, feature_types=None,
gamma=None, gpu_id=None,
grow_policy=None, importance_type=None,
interaction_constraints=None,
learning_rate=0.5, max_bin=None,
max_cat_threshold=None,
max_cat_to_onehot=None,
max_delta_step=None, max_depth=3,
max_leaves=None, min_child_weight=None,
missing=nan, monotone_constraints=None,
n_estimators=100, n_jobs=None,
num_parallel_tree=None, predictor=None,
random_state=None, ...),
max_features=207, threshold=-inf), 'feature_selection__estimator__learning_rate': 0.1, 'feature_selection__estimator__max_depth': 3, 'feature_selection__estimator__n_estimators': 100, 'feature_selection__max_features': 413}"	14	0.730042	0.0286622
100_SelectFromModel(estimator=XGBClassifier(base_score=None, booster=None,
callbacks=None, colsample_bylevel=None,
colsample_bynode=None,
colsample_bytree=None,
early_stopping_rounds=None,
enable_categorical=False,
eval_metric=None, feature_types=None,
gamma=None, gpu_id=None,
grow_policy=None, importance_type=None,
interaction_constraints=None,
learning_rate=0.5, max_bin=None,
max_cat_threshold=None,
max_cat_to_onehot=None,
max_delta_step=None, max_depth=3,
max_leaves=None, min_child_weight=None,
missing=nan, monotone_constraints=None,
n_estimators=100, n_jobs=None,
num_parallel_tree=None, predictor=None,
random_state=None, ...),
max_features=207, threshold=-inf)_0.5_3_250_517"	{'classify__C': 100, 'feature_selection': SelectFromModel(estimator=XGBClassifier(base_score=None, booster=None,
callbacks=None, colsample_bylevel=None,
colsample_bynode=None,
colsample_bytree=None,
early_stopping_rounds=None,
enable_categorical=False,
eval_metric=None, feature_types=None,
gamma=None, gpu_id=None,
grow_policy=None, importance_type=None,
interaction_constraints=None,
learning_rate=0.5, max_bin=None,
max_cat_threshold=None,
max_cat_to_onehot=None,
max_delta_step=None, max_depth=3,
max_leaves=None, min_child_weight=None,
missing=nan, monotone_constraints=None,
n_estimators=100, n_jobs=None,
num_parallel_tree=None, predictor=None,
random_state=None, ...),
max_features=207, threshold=-inf), 'feature_selection__estimator__learning_rate': 0.5, 'feature_selection__estimator__max_depth': 3, 'feature_selection__estimator__n_estimators': 250, 'feature_selection__max_features': 517}"	15	0.729239	0.05327
200_SelectFromModel(estimator=XGBClassifier(base_score=None, booster=None,
callbacks=None, colsample_bylevel=None,
colsample_bynode=None,
colsample_bytree=None,
early_stopping_rounds=None,
enable_categorical=False,
eval_metric=None, feature_types=None,
gamma=None, gpu_id=None,
grow_policy=None, importance_type=None,
interaction_constraints=None,
learning_rate=0.5, max_bin=None,
max_cat_threshold=None,
max_cat_to_onehot=None,
max_delta_step=None, max_depth=3,
max_leaves=None, min_child_weight=None,
missing=nan, monotone_constraints=None,
n_estimators=100, n_jobs=None,
num_parallel_tree=None, predictor=None,
random_state=None, ...),
max_features=207, threshold=-inf)_0.5_3_250_517"	{'classify__C': 200, 'feature_selection': SelectFromModel(estimator=XGBClassifier(base_score=None, booster=None,
callbacks=None, colsample_bylevel=None,
colsample_bynode=None,
colsample_bytree=None,
early_stopping_rounds=None,
enable_categorical=False,
eval_metric=None, feature_types=None,
gamma=None, gpu_id=None,
grow_policy=None, importance_type=None,
interaction_constraints=None,
learning_rate=0.5, max_bin=None,
max_cat_threshold=None,
max_cat_to_onehot=None,
max_delta_step=None, max_depth=3,
max_leaves=None, min_child_weight=None,
missing=nan, monotone_constraints=None,
n_estimators=100, n_jobs=None,
num_parallel_tree=None, predictor=None,
random_state=None, ...),
max_features=207, threshold=-inf), 'feature_selection__estimator__learning_rate': 0.5, 'feature_selection__estimator__max_depth': 3, 'feature_selection__estimator__n_estimators': 250, 'feature_selection__max_features': 517}"	16	0.728842	0.0545186
100_SelectFromModel(estimator=XGBClassifier(base_score=None, booster=None,
callbacks=None, colsample_bylevel=None,
colsample_bynode=None,
colsample_bytree=None,
early_stopping_rounds=None,
enable_categorical=False,
eval_metric=None, feature_types=None,
gamma=None, gpu_id=None,
grow_policy=None, importance_type=None,
interaction_constraints=None,
learning_rate=0.5, max_bin=None,
max_cat_threshold=None,
max_cat_to_onehot=None,
max_delta_step=None, max_depth=3,
max_leaves=None, min_child_weight=None,
missing=nan, monotone_constraints=None,
n_estimators=100, n_jobs=None,
num_parallel_tree=None, predictor=None,
random_state=None, ...),
max_features=207, threshold=-inf)_0.5_3_500_517"	{'classify__C': 100, 'feature_selection': SelectFromModel(estimator=XGBClassifier(base_score=None, booster=None,
callbacks=None, colsample_bylevel=None,
colsample_bynode=None,
colsample_bytree=None,
early_stopping_rounds=None,
enable_categorical=False,
eval_metric=None, feature_types=None,
gamma=None, gpu_id=None,
grow_policy=None, importance_type=None,
interaction_constraints=None,
learning_rate=0.5, max_bin=None,
max_cat_threshold=None,
max_cat_to_onehot=None,
max_delta_step=None, max_depth=3,
max_leaves=None, min_child_weight=None,
missing=nan, monotone_constraints=None,
n_estimators=100, n_jobs=None,
num_parallel_tree=None, predictor=None,
random_state=None, ...),
max_features=207, threshold=-inf), 'feature_selection__estimator__learning_rate': 0.5, 'feature_selection__estimator__max_depth': 3, 'feature_selection__estimator__n_estimators': 500, 'feature_selection__max_features': 517}"	17	0.728352	0.052183
200_SelectFromModel(estimator=XGBClassifier(base_score=None, booster=None,
callbacks=None, colsample_bylevel=None,
colsample_bynode=None,
colsample_bytree=None,
early_stopping_rounds=None,
enable_categorical=False,
eval_metric=None, feature_types=None,
gamma=None, gpu_id=None,
grow_policy=None, importance_type=None,
interaction_constraints=None,
learning_rate=0.5, max_bin=None,
max_cat_threshold=None,
max_cat_to_onehot=None,
max_delta_step=None, max_depth=3,
max_leaves=None, min_child_weight=None,
missing=nan, monotone_constraints=None,
n_estimators=100, n_jobs=None,
num_parallel_tree=None, predictor=None,
random_state=None, ...),
max_features=207, threshold=-inf)_0.5_3_500_517"	{'classify__C': 200, 'feature_selection': SelectFromModel(estimator=XGBClassifier(base_score=None, booster=None,
callbacks=None, colsample_bylevel=None,
colsample_bynode=None,
colsample_bytree=None,
early_stopping_rounds=None,
enable_categorical=False,
eval_metric=None, feature_types=None,
gamma=None, gpu_id=None,
grow_policy=None, importance_type=None,
interaction_constraints=None,
learning_rate=0.5, max_bin=None,
max_cat_threshold=None,
max_cat_to_onehot=None,
max_delta_step=None, max_depth=3,
max_leaves=None, min_child_weight=None,
missing=nan, monotone_constraints=None,
n_estimators=100, n_jobs=None,
num_parallel_tree=None, predictor=None,
random_state=None, ...),
max_features=207, threshold=-inf), 'feature_selection__estimator__learning_rate': 0.5, 'feature_selection__estimator__max_depth': 3, 'feature_selection__estimator__n_estimators': 500, 'feature_selection__max_features': 517}"	18	0.728224	0.0526446
100_SelectFromModel(estimator=XGBClassifier(base_score=None, booster=None,
callbacks=None, colsample_bylevel=None,
colsample_bynode=None,
colsample_bytree=None,
early_stopping_rounds=None,
enable_categorical=False,
eval_metric=None, feature_types=None,
gamma=None, gpu_id=None,
grow_policy=None, importance_type=None,
interaction_constraints=None,
learning_rate=0.5, max_bin=None,
max_cat_threshold=None,
max_cat_to_onehot=None,
max_delta_step=None, max_depth=3,
max_leaves=None, min_child_weight=None,
missing=nan, monotone_constraints=None,
n_estimators=100, n_jobs=None,
num_parallel_tree=None, predictor=None,
random_state=None, ...),
max_features=207, threshold=-inf)_0.1_3_100_207"	{'classify__C': 100, 'feature_selection': SelectFromModel(estimator=XGBClassifier(base_score=None, booster=None,
callbacks=None, colsample_bylevel=None,
colsample_bynode=None,
colsample_bytree=None,
early_stopping_rounds=None,
enable_categorical=False,
eval_metric=None, feature_types=None,
gamma=None, gpu_id=None,
grow_policy=None, importance_type=None,
interaction_constraints=None,
learning_rate=0.5, max_bin=None,
max_cat_threshold=None,
max_cat_to_onehot=None,
max_delta_step=None, max_depth=3,
max_leaves=None, min_child_weight=None,
missing=nan, monotone_constraints=None,
n_estimators=100, n_jobs=None,
num_parallel_tree=None, predictor=None,
random_state=None, ...),
max_features=207, threshold=-inf), 'feature_selection__estimator__learning_rate': 0.1, 'feature_selection__estimator__max_depth': 3, 'feature_selection__estimator__n_estimators': 100, 'feature_selection__max_features': 207}"	19	0.72746	0.0324477
200_SelectFromModel(estimator=XGBClassifier(base_score=None, booster=None,
callbacks=None, colsample_bylevel=None,
colsample_bynode=None,
colsample_bytree=None,
early_stopping_rounds=None,
enable_categorical=False,
eval_metric=None, feature_types=None,
gamma=None, gpu_id=None,
grow_policy=None, importance_type=None,
interaction_constraints=None,
learning_rate=0.5, max_bin=None,
max_cat_threshold=None,
max_cat_to_onehot=None,
max_delta_step=None, max_depth=3,
max_leaves=None, min_child_weight=None,
missing=nan, monotone_constraints=None,
n_estimators=100, n_jobs=None,
num_parallel_tree=None, predictor=None,
random_state=None, ...),
max_features=207, threshold=-inf)_0.3_3_250_207"	{'classify__C': 200, 'feature_selection': SelectFromModel(estimator=XGBClassifier(base_score=None, booster=None,
callbacks=None, colsample_bylevel=None,
colsample_bynode=None,
colsample_bytree=None,
early_stopping_rounds=None,
enable_categorical=False,
eval_metric=None, feature_types=None,
gamma=None, gpu_id=None,
grow_policy=None, importance_type=None,
interaction_constraints=None,
learning_rate=0.5, max_bin=None,
max_cat_threshold=None,
max_cat_to_onehot=None,
max_delta_step=None, max_depth=3,
max_leaves=None, min_child_weight=None,
missing=nan, monotone_constraints=None,
n_estimators=100, n_jobs=None,
num_parallel_tree=None, predictor=None,
random_state=None, ...),
max_features=207, threshold=-inf), 'feature_selection__estimator__learning_rate': 0.3, 'feature_selection__estimator__max_depth': 3, 'feature_selection__estimator__n_estimators': 250, 'feature_selection__max_features': 207}"	20	0.724183	0.0382224
200_SelectFromModel(estimator=XGBClassifier(base_score=None, booster=None,
callbacks=None, colsample_bylevel=None,
colsample_bynode=None,
colsample_bytree=None,
early_stopping_rounds=None,
enable_categorical=False,
eval_metric=None, feature_types=None,
gamma=None, gpu_id=None,
grow_policy=None, importance_type=None,
interaction_constraints=None,
learning_rate=0.5, max_bin=None,
max_cat_threshold=None,
max_cat_to_onehot=None,
max_delta_step=None, max_depth=3,
max_leaves=None, min_child_weight=None,
missing=nan, monotone_constraints=None,
n_estimators=100, n_jobs=None,
num_parallel_tree=None, predictor=None,
random_state=None, ...),
max_features=207, threshold=-inf)_0.5_3_250_413"	{'classify__C': 200, 'feature_selection': SelectFromModel(estimator=XGBClassifier(base_score=None, booster=None,
callbacks=None, colsample_bylevel=None,
colsample_bynode=None,
colsample_bytree=None,
early_stopping_rounds=None,
enable_categorical=False,
eval_metric=None, feature_types=None,
gamma=None, gpu_id=None,
grow_policy=None, importance_type=None,
interaction_constraints=None,
learning_rate=0.5, max_bin=None,
max_cat_threshold=None,
max_cat_to_onehot=None,
max_delta_step=None, max_depth=3,
max_leaves=None, min_child_weight=None,
missing=nan, monotone_constraints=None,
n_estimators=100, n_jobs=None,
num_parallel_tree=None, predictor=None,
random_state=None, ...),
max_features=207, threshold=-inf), 'feature_selection__estimator__learning_rate': 0.5, 'feature_selection__estimator__max_depth': 3, 'feature_selection__estimator__n_estimators': 250, 'feature_selection__max_features': 413}"	21	0.72251	0.050884
100_SelectFromModel(estimator=XGBClassifier(base_score=None, booster=None,
callbacks=None, colsample_bylevel=None,
colsample_bynode=None,
colsample_bytree=None,
early_stopping_rounds=None,
enable_categorical=False,
eval_metric=None, feature_types=None,
gamma=None, gpu_id=None,
grow_policy=None, importance_type=None,
interaction_constraints=None,
learning_rate=0.5, max_bin=None,
max_cat_threshold=None,
max_cat_to_onehot=None,
max_delta_step=None, max_depth=3,
max_leaves=None, min_child_weight=None,
missing=nan, monotone_constraints=None,
n_estimators=100, n_jobs=None,
num_parallel_tree=None, predictor=None,
random_state=None, ...),
max_features=207, threshold=-inf)_0.5_3_250_413"	{'classify__C': 100, 'feature_selection': SelectFromModel(estimator=XGBClassifier(base_score=None, booster=None,
callbacks=None, colsample_bylevel=None,
colsample_bynode=None,
colsample_bytree=None,
early_stopping_rounds=None,
enable_categorical=False,
eval_metric=None, feature_types=None,
gamma=None, gpu_id=None,
grow_policy=None, importance_type=None,
interaction_constraints=None,
learning_rate=0.5, max_bin=None,
max_cat_threshold=None,
max_cat_to_onehot=None,
max_delta_step=None, max_depth=3,
max_leaves=None, min_child_weight=None,
missing=nan, monotone_constraints=None,
n_estimators=100, n_jobs=None,
num_parallel_tree=None, predictor=None,
random_state=None, ...),
max_features=207, threshold=-inf), 'feature_selection__estimator__learning_rate': 0.5, 'feature_selection__estimator__max_depth': 3, 'feature_selection__estimator__n_estimators': 250, 'feature_selection__max_features': 413}"	22	0.721484	0.0486522
100_SelectFromModel(estimator=XGBClassifier(base_score=None, booster=None,
callbacks=None, colsample_bylevel=None,
colsample_bynode=None,
colsample_bytree=None,
early_stopping_rounds=None,
enable_categorical=False,
eval_metric=None, feature_types=None,
gamma=None, gpu_id=None,
grow_policy=None, importance_type=None,
interaction_constraints=None,
learning_rate=0.5, max_bin=None,
max_cat_threshold=None,
max_cat_to_onehot=None,
max_delta_step=None, max_depth=3,
max_leaves=None, min_child_weight=None,
missing=nan, monotone_constraints=None,
n_estimators=100, n_jobs=None,
num_parallel_tree=None, predictor=None,
random_state=None, ...),
max_features=207, threshold=-inf)_0.1_3_100_413"	{'classify__C': 100, 'feature_selection': SelectFromModel(estimator=XGBClassifier(base_score=None, booster=None,
callbacks=None, colsample_bylevel=None,
colsample_bynode=None,
colsample_bytree=None,
early_stopping_rounds=None,
enable_categorical=False,
eval_metric=None, feature_types=None,
gamma=None, gpu_id=None,
grow_policy=None, importance_type=None,
interaction_constraints=None,
learning_rate=0.5, max_bin=None,
max_cat_threshold=None,
max_cat_to_onehot=None,
max_delta_step=None, max_depth=3,
max_leaves=None, min_child_weight=None,
missing=nan, monotone_constraints=None,
n_estimators=100, n_jobs=None,
num_parallel_tree=None, predictor=None,
random_state=None, ...),
max_features=207, threshold=-inf), 'feature_selection__estimator__learning_rate': 0.1, 'feature_selection__estimator__max_depth': 3, 'feature_selection__estimator__n_estimators': 100, 'feature_selection__max_features': 413}"	23	0.721314	0.0269995
200_SelectFromModel(estimator=XGBClassifier(base_score=None, booster=None,
callbacks=None, colsample_bylevel=None,
colsample_bynode=None,
colsample_bytree=None,
early_stopping_rounds=None,
enable_categorical=False,
eval_metric=None, feature_types=None,
gamma=None, gpu_id=None,
grow_policy=None, importance_type=None,
interaction_constraints=None,
learning_rate=0.5, max_bin=None,
max_cat_threshold=None,
max_cat_to_onehot=None,
max_delta_step=None, max_depth=3,
max_leaves=None, min_child_weight=None,
missing=nan, monotone_constraints=None,
n_estimators=100, n_jobs=None,
num_parallel_tree=None, predictor=None,
random_state=None, ...),
max_features=207, threshold=-inf)_0.3_3_500_207"	{'classify__C': 200, 'feature_selection': SelectFromModel(estimator=XGBClassifier(base_score=None, booster=None,
callbacks=None, colsample_bylevel=None,
colsample_bynode=None,
colsample_bytree=None,
early_stopping_rounds=None,
enable_categorical=False,
eval_metric=None, feature_types=None,
gamma=None, gpu_id=None,
grow_policy=None, importance_type=None,
interaction_constraints=None,
learning_rate=0.5, max_bin=None,
max_cat_threshold=None,
max_cat_to_onehot=None,
max_delta_step=None, max_depth=3,
max_leaves=None, min_child_weight=None,
missing=nan, monotone_constraints=None,
n_estimators=100, n_jobs=None,
num_parallel_tree=None, predictor=None,
random_state=None, ...),
max_features=207, threshold=-inf), 'feature_selection__estimator__learning_rate': 0.3, 'feature_selection__estimator__max_depth': 3, 'feature_selection__estimator__n_estimators': 500, 'feature_selection__max_features': 207}"	24	0.721097	0.0420026
200_SelectFromModel(estimator=XGBClassifier(base_score=None, booster=None,
callbacks=None, colsample_bylevel=None,
colsample_bynode=None,
colsample_bytree=None,
early_stopping_rounds=None,
enable_categorical=False,
eval_metric=None, feature_types=None,
gamma=None, gpu_id=None,
grow_policy=None, importance_type=None,
interaction_constraints=None,
learning_rate=0.5, max_bin=None,
max_cat_threshold=None,
max_cat_to_onehot=None,
max_delta_step=None, max_depth=3,
max_leaves=None, min_child_weight=None,
missing=nan, monotone_constraints=None,
n_estimators=100, n_jobs=None,
num_parallel_tree=None, predictor=None,
random_state=None, ...),
max_features=207, threshold=-inf)_0.5_3_500_413"	{'classify__C': 200, 'feature_selection': SelectFromModel(estimator=XGBClassifier(base_score=None, booster=None,
callbacks=None, colsample_bylevel=None,
colsample_bynode=None,
colsample_bytree=None,
early_stopping_rounds=None,
enable_categorical=False,
eval_metric=None, feature_types=None,
gamma=None, gpu_id=None,
grow_policy=None, importance_type=None,
interaction_constraints=None,
learning_rate=0.5, max_bin=None,
max_cat_threshold=None,
max_cat_to_onehot=None,
max_delta_step=None, max_depth=3,
max_leaves=None, min_child_weight=None,
missing=nan, monotone_constraints=None,
n_estimators=100, n_jobs=None,
num_parallel_tree=None, predictor=None,
random_state=None, ...),
max_features=207, threshold=-inf), 'feature_selection__estimator__learning_rate': 0.5, 'feature_selection__estimator__max_depth': 3, 'feature_selection__estimator__n_estimators': 500, 'feature_selection__max_features': 413}"	25	0.720463	0.0492607
100_SelectFromModel(estimator=XGBClassifier(base_score=None, booster=None,
callbacks=None, colsample_bylevel=None,
colsample_bynode=None,
colsample_bytree=None,
early_stopping_rounds=None,
enable_categorical=False,
eval_metric=None, feature_types=None,
gamma=None, gpu_id=None,
grow_policy=None, importance_type=None,
interaction_constraints=None,
learning_rate=0.5, max_bin=None,
max_cat_threshold=None,
max_cat_to_onehot=None,
max_delta_step=None, max_depth=3,
max_leaves=None, min_child_weight=None,
missing=nan, monotone_constraints=None,
n_estimators=100, n_jobs=None,
num_parallel_tree=None, predictor=None,
random_state=None, ...),
max_features=207, threshold=-inf)_0.5_3_500_413"	{'classify__C': 100, 'feature_selection': SelectFromModel(estimator=XGBClassifier(base_score=None, booster=None,
callbacks=None, colsample_bylevel=None,
colsample_bynode=None,
colsample_bytree=None,
early_stopping_rounds=None,
enable_categorical=False,
eval_metric=None, feature_types=None,
gamma=None, gpu_id=None,
grow_policy=None, importance_type=None,
interaction_constraints=None,
learning_rate=0.5, max_bin=None,
max_cat_threshold=None,
max_cat_to_onehot=None,
max_delta_step=None, max_depth=3,
max_leaves=None, min_child_weight=None,
missing=nan, monotone_constraints=None,
n_estimators=100, n_jobs=None,
num_parallel_tree=None, predictor=None,
random_state=None, ...),
max_features=207, threshold=-inf), 'feature_selection__estimator__learning_rate': 0.5, 'feature_selection__estimator__max_depth': 3, 'feature_selection__estimator__n_estimators': 500, 'feature_selection__max_features': 413}"	26	0.720251	0.0450379
200_SelectFromModel(estimator=XGBClassifier(base_score=None, booster=None,
callbacks=None, colsample_bylevel=None,
colsample_bynode=None,
colsample_bytree=None,
early_stopping_rounds=None,
enable_categorical=False,
eval_metric=None, feature_types=None,
gamma=None, gpu_id=None,
grow_policy=None, importance_type=None,
interaction_constraints=None,
learning_rate=0.5, max_bin=None,
max_cat_threshold=None,
max_cat_to_onehot=None,
max_delta_step=None, max_depth=3,
max_leaves=None, min_child_weight=None,
missing=nan, monotone_constraints=None,
n_estimators=100, n_jobs=None,
num_parallel_tree=None, predictor=None,
random_state=None, ...),
max_features=207, threshold=-inf)_0.5_3_500_1378"	{'classify__C': 200, 'feature_selection': SelectFromModel(estimator=XGBClassifier(base_score=None, booster=None,
callbacks=None, colsample_bylevel=None,
colsample_bynode=None,
colsample_bytree=None,
early_stopping_rounds=None,
enable_categorical=False,
eval_metric=None, feature_types=None,
gamma=None, gpu_id=None,
grow_policy=None, importance_type=None,
interaction_constraints=None,
learning_rate=0.5, max_bin=None,
max_cat_threshold=None,
max_cat_to_onehot=None,
max_delta_step=None, max_depth=3,
max_leaves=None, min_child_weight=None,
missing=nan, monotone_constraints=None,
n_estimators=100, n_jobs=None,
num_parallel_tree=None, predictor=None,
random_state=None, ...),
max_features=207, threshold=-inf), 'feature_selection__estimator__learning_rate': 0.5, 'feature_selection__estimator__max_depth': 3, 'feature_selection__estimator__n_estimators': 500, 'feature_selection__max_features': 1378}"	27	0.71946	0.0342001
200_SelectFromModel(estimator=XGBClassifier(base_score=None, booster=None,
callbacks=None, colsample_bylevel=None,
colsample_bynode=None,
colsample_bytree=None,
early_stopping_rounds=None,
enable_categorical=False,
eval_metric=None, feature_types=None,
gamma=None, gpu_id=None,
grow_policy=None, importance_type=None,
interaction_constraints=None,
learning_rate=0.5, max_bin=None,
max_cat_threshold=None,
max_cat_to_onehot=None,
max_delta_step=None, max_depth=3,
max_leaves=None, min_child_weight=None,
missing=nan, monotone_constraints=None,
n_estimators=100, n_jobs=None,
num_parallel_tree=None, predictor=None,
random_state=None, ...),
max_features=207, threshold=-inf)_0.1_3_100_517"	{'classify__C': 200, 'feature_selection': SelectFromModel(estimator=XGBClassifier(base_score=None, booster=None,
callbacks=None, colsample_bylevel=None,
colsample_bynode=None,
colsample_bytree=None,
early_stopping_rounds=None,
enable_categorical=False,
eval_metric=None, feature_types=None,
gamma=None, gpu_id=None,
grow_policy=None, importance_type=None,
interaction_constraints=None,
learning_rate=0.5, max_bin=None,
max_cat_threshold=None,
max_cat_to_onehot=None,
max_delta_step=None, max_depth=3,
max_leaves=None, min_child_weight=None,
missing=nan, monotone_constraints=None,
n_estimators=100, n_jobs=None,
num_parallel_tree=None, predictor=None,
random_state=None, ...),
max_features=207, threshold=-inf), 'feature_selection__estimator__learning_rate': 0.1, 'feature_selection__estimator__max_depth': 3, 'feature_selection__estimator__n_estimators': 100, 'feature_selection__max_features': 517}"	28	0.717207	0.0238409
100_SelectFromModel(estimator=XGBClassifier(base_score=None, booster=None,
callbacks=None, colsample_bylevel=None,
colsample_bynode=None,
colsample_bytree=None,
early_stopping_rounds=None,
enable_categorical=False,
eval_metric=None, feature_types=None,
gamma=None, gpu_id=None,
grow_policy=None, importance_type=None,
interaction_constraints=None,
learning_rate=0.5, max_bin=None,
max_cat_threshold=None,
max_cat_to_onehot=None,
max_delta_step=None, max_depth=3,
max_leaves=None, min_child_weight=None,
missing=nan, monotone_constraints=None,
n_estimators=100, n_jobs=None,
num_parallel_tree=None, predictor=None,
random_state=None, ...),
max_features=207, threshold=-inf)_0.1_3_100_517"	{'classify__C': 100, 'feature_selection': SelectFromModel(estimator=XGBClassifier(base_score=None, booster=None,
callbacks=None, colsample_bylevel=None,
colsample_bynode=None,
colsample_bytree=None,
early_stopping_rounds=None,
enable_categorical=False,
eval_metric=None, feature_types=None,
gamma=None, gpu_id=None,
grow_policy=None, importance_type=None,
interaction_constraints=None,
learning_rate=0.5, max_bin=None,
max_cat_threshold=None,
max_cat_to_onehot=None,
max_delta_step=None, max_depth=3,
max_leaves=None, min_child_weight=None,
missing=nan, monotone_constraints=None,
n_estimators=100, n_jobs=None,
num_parallel_tree=None, predictor=None,
random_state=None, ...),
max_features=207, threshold=-inf), 'feature_selection__estimator__learning_rate': 0.1, 'feature_selection__estimator__max_depth': 3, 'feature_selection__estimator__n_estimators': 100, 'feature_selection__max_features': 517}"	29	0.715892	0.0255399
200_SelectFromModel(estimator=XGBClassifier(base_score=None, booster=None,
callbacks=None, colsample_bylevel=None,
colsample_bynode=None,
colsample_bytree=None,
early_stopping_rounds=None,
enable_categorical=False,
eval_metric=None, feature_types=None,
gamma=None, gpu_id=None,
grow_policy=None, importance_type=None,
interaction_constraints=None,
learning_rate=0.5, max_bin=None,
max_cat_threshold=None,
max_cat_to_onehot=None,
max_delta_step=None, max_depth=3,
max_leaves=None, min_child_weight=None,
missing=nan, monotone_constraints=None,
n_estimators=100, n_jobs=None,
num_parallel_tree=None, predictor=None,
random_state=None, ...),
max_features=207, threshold=-inf)_0.5_3_250_1378"	{'classify__C': 200, 'feature_selection': SelectFromModel(estimator=XGBClassifier(base_score=None, booster=None,
callbacks=None, colsample_bylevel=None,
colsample_bynode=None,
colsample_bytree=None,
early_stopping_rounds=None,
enable_categorical=False,
eval_metric=None, feature_types=None,
gamma=None, gpu_id=None,
grow_policy=None, importance_type=None,
interaction_constraints=None,
learning_rate=0.5, max_bin=None,
max_cat_threshold=None,
max_cat_to_onehot=None,
max_delta_step=None, max_depth=3,
max_leaves=None, min_child_weight=None,
missing=nan, monotone_constraints=None,
n_estimators=100, n_jobs=None,
num_parallel_tree=None, predictor=None,
random_state=None, ...),
max_features=207, threshold=-inf), 'feature_selection__estimator__learning_rate': 0.5, 'feature_selection__estimator__max_depth': 3, 'feature_selection__estimator__n_estimators': 250, 'feature_selection__max_features': 1378}"	30	0.714381	0.0345417
200_SelectFromModel(estimator=XGBClassifier(base_score=None, booster=None,
callbacks=None, colsample_bylevel=None,
colsample_bynode=None,
colsample_bytree=None,
early_stopping_rounds=None,
enable_categorical=False,
eval_metric=None, feature_types=None,
gamma=None, gpu_id=None,
grow_policy=None, importance_type=None,
interaction_constraints=None,
learning_rate=0.5, max_bin=None,
max_cat_threshold=None,
max_cat_to_onehot=None,
max_delta_step=None, max_depth=3,
max_leaves=None, min_child_weight=None,
missing=nan, monotone_constraints=None,
n_estimators=100, n_jobs=None,
num_parallel_tree=None, predictor=None,
random_state=None, ...),
max_features=207, threshold=-inf)_0.5_5_500_1378"	{'classify__C': 200, 'feature_selection': SelectFromModel(estimator=XGBClassifier(base_score=None, booster=None,
callbacks=None, colsample_bylevel=None,
colsample_bynode=None,
colsample_bytree=None,
early_stopping_rounds=None,
enable_categorical=False,
eval_metric=None, feature_types=None,
gamma=None, gpu_id=None,
grow_policy=None, importance_type=None,
interaction_constraints=None,
learning_rate=0.5, max_bin=None,
max_cat_threshold=None,
max_cat_to_onehot=None,
max_delta_step=None, max_depth=3,
max_leaves=None, min_child_weight=None,
missing=nan, monotone_constraints=None,
n_estimators=100, n_jobs=None,
num_parallel_tree=None, predictor=None,
random_state=None, ...),
max_features=207, threshold=-inf), 'feature_selection__estimator__learning_rate': 0.5, 'feature_selection__estimator__max_depth': 5, 'feature_selection__estimator__n_estimators': 500, 'feature_selection__max_features': 1378}"	31	0.713639	0.027548
200_SelectFromModel(estimator=XGBClassifier(base_score=None, booster=None,
callbacks=None, colsample_bylevel=None,
colsample_bynode=None,
colsample_bytree=None,
early_stopping_rounds=None,
enable_categorical=False,
eval_metric=None, feature_types=None,
gamma=None, gpu_id=None,
grow_policy=None, importance_type=None,
interaction_constraints=None,
learning_rate=0.5, max_bin=None,
max_cat_threshold=None,
max_cat_to_onehot=None,
max_delta_step=None, max_depth=3,
max_leaves=None, min_child_weight=None,
missing=nan, monotone_constraints=None,
n_estimators=100, n_jobs=None,
num_parallel_tree=None, predictor=None,
random_state=None, ...),
max_features=207, threshold=-inf)_0.3_3_100_413"	{'classify__C': 200, 'feature_selection': SelectFromModel(estimator=XGBClassifier(base_score=None, booster=None,
callbacks=None, colsample_bylevel=None,
colsample_bynode=None,
colsample_bytree=None,
early_stopping_rounds=None,
enable_categorical=False,
eval_metric=None, feature_types=None,
gamma=None, gpu_id=None,
grow_policy=None, importance_type=None,
interaction_constraints=None,
learning_rate=0.5, max_bin=None,
max_cat_threshold=None,
max_cat_to_onehot=None,
max_delta_step=None, max_depth=3,
max_leaves=None, min_child_weight=None,
missing=nan, monotone_constraints=None,
n_estimators=100, n_jobs=None,
num_parallel_tree=None, predictor=None,
random_state=None, ...),
max_features=207, threshold=-inf), 'feature_selection__estimator__learning_rate': 0.3, 'feature_selection__estimator__max_depth': 3, 'feature_selection__estimator__n_estimators': 100, 'feature_selection__max_features': 413}"	32	0.712227	0.0450982
200_SelectFromModel(estimator=XGBClassifier(base_score=None, booster=None,
callbacks=None, colsample_bylevel=None,
colsample_bynode=None,
colsample_bytree=None,
early_stopping_rounds=None,
enable_categorical=False,
eval_metric=None, feature_types=None,
gamma=None, gpu_id=None,
grow_policy=None, importance_type=None,
interaction_constraints=None,
learning_rate=0.5, max_bin=None,
max_cat_threshold=None,
max_cat_to_onehot=None,
max_delta_step=None, max_depth=3,
max_leaves=None, min_child_weight=None,
missing=nan, monotone_constraints=None,
n_estimators=100, n_jobs=None,
num_parallel_tree=None, predictor=None,
random_state=None, ...),
max_features=207, threshold=-inf)_0.5_5_250_1378"	{'classify__C': 200, 'feature_selection': SelectFromModel(estimator=XGBClassifier(base_score=None, booster=None,
callbacks=None, colsample_bylevel=None,
colsample_bynode=None,
colsample_bytree=None,
early_stopping_rounds=None,
enable_categorical=False,
eval_metric=None, feature_types=None,
gamma=None, gpu_id=None,
grow_policy=None, importance_type=None,
interaction_constraints=None,
learning_rate=0.5, max_bin=None,
max_cat_threshold=None,
max_cat_to_onehot=None,
max_delta_step=None, max_depth=3,
max_leaves=None, min_child_weight=None,
missing=nan, monotone_constraints=None,
n_estimators=100, n_jobs=None,
num_parallel_tree=None, predictor=None,
random_state=None, ...),
max_features=207, threshold=-inf), 'feature_selection__estimator__learning_rate': 0.5, 'feature_selection__estimator__max_depth': 5, 'feature_selection__estimator__n_estimators': 250, 'feature_selection__max_features': 1378}"	33	0.711602	0.0290535
100_SelectFromModel(estimator=XGBClassifier(base_score=None, booster=None,
callbacks=None, colsample_bylevel=None,
colsample_bynode=None,
colsample_bytree=None,
early_stopping_rounds=None,
enable_categorical=False,
eval_metric=None, feature_types=None,
gamma=None, gpu_id=None,
grow_policy=None, importance_type=None,
interaction_constraints=None,
learning_rate=0.5, max_bin=None,
max_cat_threshold=None,
max_cat_to_onehot=None,
max_delta_step=None, max_depth=3,
max_leaves=None, min_child_weight=None,
missing=nan, monotone_constraints=None,
n_estimators=100, n_jobs=None,
num_parallel_tree=None, predictor=None,
random_state=None, ...),
max_features=207, threshold=-inf)_0.3_3_500_207"	{'classify__C': 100, 'feature_selection': SelectFromModel(estimator=XGBClassifier(base_score=None, booster=None,
callbacks=None, colsample_bylevel=None,
colsample_bynode=None,
colsample_bytree=None,
early_stopping_rounds=None,
enable_categorical=False,
eval_metric=None, feature_types=None,
gamma=None, gpu_id=None,
grow_policy=None, importance_type=None,
interaction_constraints=None,
learning_rate=0.5, max_bin=None,
max_cat_threshold=None,
max_cat_to_onehot=None,
max_delta_step=None, max_depth=3,
max_leaves=None, min_child_weight=None,
missing=nan, monotone_constraints=None,
n_estimators=100, n_jobs=None,
num_parallel_tree=None, predictor=None,
random_state=None, ...),
max_features=207, threshold=-inf), 'feature_selection__estimator__learning_rate': 0.3, 'feature_selection__estimator__max_depth': 3, 'feature_selection__estimator__n_estimators': 500, 'feature_selection__max_features': 207}"	34	0.709686	0.0355521
100_SelectFromModel(estimator=XGBClassifier(base_score=None, booster=None,
callbacks=None, colsample_bylevel=None,
colsample_bynode=None,
colsample_bytree=None,
early_stopping_rounds=None,
enable_categorical=False,
eval_metric=None, feature_types=None,
gamma=None, gpu_id=None,
grow_policy=None, importance_type=None,
interaction_constraints=None,
learning_rate=0.5, max_bin=None,
max_cat_threshold=None,
max_cat_to_onehot=None,
max_delta_step=None, max_depth=3,
max_leaves=None, min_child_weight=None,
missing=nan, monotone_constraints=None,
n_estimators=100, n_jobs=None,
num_parallel_tree=None, predictor=None,
random_state=None, ...),
max_features=207, threshold=-inf)_0.3_3_100_413"	{'classify__C': 100, 'feature_selection': SelectFromModel(estimator=XGBClassifier(base_score=None, booster=None,
callbacks=None, colsample_bylevel=None,
colsample_bynode=None,
colsample_bytree=None,
early_stopping_rounds=None,
enable_categorical=False,
eval_metric=None, feature_types=None,
gamma=None, gpu_id=None,
grow_policy=None, importance_type=None,
interaction_constraints=None,
learning_rate=0.5, max_bin=None,
max_cat_threshold=None,
max_cat_to_onehot=None,
max_delta_step=None, max_depth=3,
max_leaves=None, min_child_weight=None,
missing=nan, monotone_constraints=None,
n_estimators=100, n_jobs=None,
num_parallel_tree=None, predictor=None,
random_state=None, ...),
max_features=207, threshold=-inf), 'feature_selection__estimator__learning_rate': 0.3, 'feature_selection__estimator__max_depth': 3, 'feature_selection__estimator__n_estimators': 100, 'feature_selection__max_features': 413}"	35	0.709475	0.0360938
200_SelectFromModel(estimator=XGBClassifier(base_score=None, booster=None,
callbacks=None, colsample_bylevel=None,
colsample_bynode=None,
colsample_bytree=None,
early_stopping_rounds=None,
enable_categorical=False,
eval_metric=None, feature_types=None,
gamma=None, gpu_id=None,
grow_policy=None, importance_type=None,
interaction_constraints=None,
learning_rate=0.5, max_bin=None,
max_cat_threshold=None,
max_cat_to_onehot=None,
max_delta_step=None, max_depth=3,
max_leaves=None, min_child_weight=None,
missing=nan, monotone_constraints=None,
n_estimators=100, n_jobs=None,
num_parallel_tree=None, predictor=None,
random_state=None, ...),
max_features=207, threshold=-inf)_0.5_5_100_1378"	{'classify__C': 200, 'feature_selection': SelectFromModel(estimator=XGBClassifier(base_score=None, booster=None,
callbacks=None, colsample_bylevel=None,
colsample_bynode=None,
colsample_bytree=None,
early_stopping_rounds=None,
enable_categorical=False,
eval_metric=None, feature_types=None,
gamma=None, gpu_id=None,
grow_policy=None, importance_type=None,
interaction_constraints=None,
learning_rate=0.5, max_bin=None,
max_cat_threshold=None,
max_cat_to_onehot=None,
max_delta_step=None, max_depth=3,
max_leaves=None, min_child_weight=None,
missing=nan, monotone_constraints=None,
n_estimators=100, n_jobs=None,
num_parallel_tree=None, predictor=None,
random_state=None, ...),
max_features=207, threshold=-inf), 'feature_selection__estimator__learning_rate': 0.5, 'feature_selection__estimator__max_depth': 5, 'feature_selection__estimator__n_estimators': 100, 'feature_selection__max_features': 1378}"	36	0.709298	0.0311337
100_SelectFromModel(estimator=XGBClassifier(base_score=None, booster=None,
callbacks=None, colsample_bylevel=None,
colsample_bynode=None,
colsample_bytree=None,
early_stopping_rounds=None,
enable_categorical=False,
eval_metric=None, feature_types=None,
gamma=None, gpu_id=None,
grow_policy=None, importance_type=None,
interaction_constraints=None,
learning_rate=0.5, max_bin=None,
max_cat_threshold=None,
max_cat_to_onehot=None,
max_delta_step=None, max_depth=3,
max_leaves=None, min_child_weight=None,
missing=nan, monotone_constraints=None,
n_estimators=100, n_jobs=None,
num_parallel_tree=None, predictor=None,
random_state=None, ...),
max_features=207, threshold=-inf)_0.3_3_250_207"	{'classify__C': 100, 'feature_selection': SelectFromModel(estimator=XGBClassifier(base_score=None, booster=None,
callbacks=None, colsample_bylevel=None,
colsample_bynode=None,
colsample_bytree=None,
early_stopping_rounds=None,
enable_categorical=False,
eval_metric=None, feature_types=None,
gamma=None, gpu_id=None,
grow_policy=None, importance_type=None,
interaction_constraints=None,
learning_rate=0.5, max_bin=None,
max_cat_threshold=None,
max_cat_to_onehot=None,
max_delta_step=None, max_depth=3,
max_leaves=None, min_child_weight=None,
missing=nan, monotone_constraints=None,
n_estimators=100, n_jobs=None,
num_parallel_tree=None, predictor=None,
random_state=None, ...),
max_features=207, threshold=-inf), 'feature_selection__estimator__learning_rate': 0.3, 'feature_selection__estimator__max_depth': 3, 'feature_selection__estimator__n_estimators': 250, 'feature_selection__max_features': 207}"	37	0.709164	0.0327061
200_SelectFromModel(estimator=XGBClassifier(base_score=None, booster=None,
callbacks=None, colsample_bylevel=None,
colsample_bynode=None,
colsample_bytree=None,
early_stopping_rounds=None,
enable_categorical=False,
eval_metric=None, feature_types=None,
gamma=None, gpu_id=None,
grow_policy=None, importance_type=None,
interaction_constraints=None,
learning_rate=0.5, max_bin=None,
max_cat_threshold=None,
max_cat_to_onehot=None,
max_delta_step=None, max_depth=3,
max_leaves=None, min_child_weight=None,
missing=nan, monotone_constraints=None,
n_estimators=100, n_jobs=None,
num_parallel_tree=None, predictor=None,
random_state=None, ...),
max_features=207, threshold=-inf)_0.5_3_500_1034"	{'classify__C': 200, 'feature_selection': SelectFromModel(estimator=XGBClassifier(base_score=None, booster=None,
callbacks=None, colsample_bylevel=None,
colsample_bynode=None,
colsample_bytree=None,
early_stopping_rounds=None,
enable_categorical=False,
eval_metric=None, feature_types=None,
gamma=None, gpu_id=None,
grow_policy=None, importance_type=None,
interaction_constraints=None,
learning_rate=0.5, max_bin=None,
max_cat_threshold=None,
max_cat_to_onehot=None,
max_delta_step=None, max_depth=3,
max_leaves=None, min_child_weight=None,
missing=nan, monotone_constraints=None,
n_estimators=100, n_jobs=None,
num_parallel_tree=None, predictor=None,
random_state=None, ...),
max_features=207, threshold=-inf), 'feature_selection__estimator__learning_rate': 0.5, 'feature_selection__estimator__max_depth': 3, 'feature_selection__estimator__n_estimators': 500, 'feature_selection__max_features': 1034}"	38	0.708742	0.0346335
200_SelectFromModel(estimator=XGBClassifier(base_score=None, booster=None,
callbacks=None, colsample_bylevel=None,
colsample_bynode=None,
colsample_bytree=None,
early_stopping_rounds=None,
enable_categorical=False,
eval_metric=None, feature_types=None,
gamma=None, gpu_id=None,
grow_policy=None, importance_type=None,
interaction_constraints=None,
learning_rate=0.5, max_bin=None,
max_cat_threshold=None,
max_cat_to_onehot=None,
max_delta_step=None, max_depth=3,
max_leaves=None, min_child_weight=None,
missing=nan, monotone_constraints=None,
n_estimators=100, n_jobs=None,
num_parallel_tree=None, predictor=None,
random_state=None, ...),
max_features=207, threshold=-inf)_0.5_3_100_1378"	{'classify__C': 200, 'feature_selection': SelectFromModel(estimator=XGBClassifier(base_score=None, booster=None,
callbacks=None, colsample_bylevel=None,
colsample_bynode=None,
colsample_bytree=None,
early_stopping_rounds=None,
enable_categorical=False,
eval_metric=None, feature_types=None,
gamma=None, gpu_id=None,
grow_policy=None, importance_type=None,
interaction_constraints=None,
learning_rate=0.5, max_bin=None,
max_cat_threshold=None,
max_cat_to_onehot=None,
max_delta_step=None, max_depth=3,
max_leaves=None, min_child_weight=None,
missing=nan, monotone_constraints=None,
n_estimators=100, n_jobs=None,
num_parallel_tree=None, predictor=None,
random_state=None, ...),
max_features=207, threshold=-inf), 'feature_selection__estimator__learning_rate': 0.5, 'feature_selection__estimator__max_depth': 3, 'feature_selection__estimator__n_estimators': 100, 'feature_selection__max_features': 1378}"	39	0.707633	0.0342251
200_SelectFromModel(estimator=XGBClassifier(base_score=None, booster=None,
callbacks=None, colsample_bylevel=None,
colsample_bynode=None,
colsample_bytree=None,
early_stopping_rounds=None,
enable_categorical=False,
eval_metric=None, feature_types=None,
gamma=None, gpu_id=None,
grow_policy=None, importance_type=None,
interaction_constraints=None,
learning_rate=0.5, max_bin=None,
max_cat_threshold=None,
max_cat_to_onehot=None,
max_delta_step=None, max_depth=3,
max_leaves=None, min_child_weight=None,
missing=nan, monotone_constraints=None,
n_estimators=100, n_jobs=None,
num_parallel_tree=None, predictor=None,
random_state=None, ...),
max_features=207, threshold=-inf)_0.5_3_250_1034"	{'classify__C': 200, 'feature_selection': SelectFromModel(estimator=XGBClassifier(base_score=None, booster=None,
callbacks=None, colsample_bylevel=None,
colsample_bynode=None,
colsample_bytree=None,
early_stopping_rounds=None,
enable_categorical=False,
eval_metric=None, feature_types=None,
gamma=None, gpu_id=None,
grow_policy=None, importance_type=None,
interaction_constraints=None,
learning_rate=0.5, max_bin=None,
max_cat_threshold=None,
max_cat_to_onehot=None,
max_delta_step=None, max_depth=3,
max_leaves=None, min_child_weight=None,
missing=nan, monotone_constraints=None,
n_estimators=100, n_jobs=None,
num_parallel_tree=None, predictor=None,
random_state=None, ...),
max_features=207, threshold=-inf), 'feature_selection__estimator__learning_rate': 0.5, 'feature_selection__estimator__max_depth': 3, 'feature_selection__estimator__n_estimators': 250, 'feature_selection__max_features': 1034}"	40	0.707627	0.0307139
200_SelectFromModel(estimator=XGBClassifier(base_score=None, booster=None,
callbacks=None, colsample_bylevel=None,
colsample_bynode=None,
colsample_bytree=None,
early_stopping_rounds=None,
enable_categorical=False,
eval_metric=None, feature_types=None,
gamma=None, gpu_id=None,
grow_policy=None, importance_type=None,
interaction_constraints=None,
learning_rate=0.5, max_bin=None,
max_cat_threshold=None,
max_cat_to_onehot=None,
max_delta_step=None, max_depth=3,
max_leaves=None, min_child_weight=None,
missing=nan, monotone_constraints=None,
n_estimators=100, n_jobs=None,
num_parallel_tree=None, predictor=None,
random_state=None, ...),
max_features=207, threshold=-inf)_0.3_3_500_1378"	{'classify__C': 200, 'feature_selection': SelectFromModel(estimator=XGBClassifier(base_score=None, booster=None,
callbacks=None, colsample_bylevel=None,
colsample_bynode=None,
colsample_bytree=None,
early_stopping_rounds=None,
enable_categorical=False,
eval_metric=None, feature_types=None,
gamma=None, gpu_id=None,
grow_policy=None, importance_type=None,
interaction_constraints=None,
learning_rate=0.5, max_bin=None,
max_cat_threshold=None,
max_cat_to_onehot=None,
max_delta_step=None, max_depth=3,
max_leaves=None, min_child_weight=None,
missing=nan, monotone_constraints=None,
n_estimators=100, n_jobs=None,
num_parallel_tree=None, predictor=None,
random_state=None, ...),
max_features=207, threshold=-inf), 'feature_selection__estimator__learning_rate': 0.3, 'feature_selection__estimator__max_depth': 3, 'feature_selection__estimator__n_estimators': 500, 'feature_selection__max_features': 1378}"	41	0.70758	0.0248047
200_SelectFromModel(estimator=XGBClassifier(base_score=None, booster=None,
callbacks=None, colsample_bylevel=None,
colsample_bynode=None,
colsample_bytree=None,
early_stopping_rounds=None,
enable_categorical=False,
eval_metric=None, feature_types=None,
gamma=None, gpu_id=None,
grow_policy=None, importance_type=None,
interaction_constraints=None,
learning_rate=0.5, max_bin=None,
max_cat_threshold=None,
max_cat_to_onehot=None,
max_delta_step=None, max_depth=3,
max_leaves=None, min_child_weight=None,
missing=nan, monotone_constraints=None,
n_estimators=100, n_jobs=None,
num_parallel_tree=None, predictor=None,
random_state=None, ...),
max_features=207, threshold=-inf)_0.5_3_100_1034"	{'classify__C': 200, 'feature_selection': SelectFromModel(estimator=XGBClassifier(base_score=None, booster=None,
callbacks=None, colsample_bylevel=None,
colsample_bynode=None,
colsample_bytree=None,
early_stopping_rounds=None,
enable_categorical=False,
eval_metric=None, feature_types=None,
gamma=None, gpu_id=None,
grow_policy=None, importance_type=None,
interaction_constraints=None,
learning_rate=0.5, max_bin=None,
max_cat_threshold=None,
max_cat_to_onehot=None,
max_delta_step=None, max_depth=3,
max_leaves=None, min_child_weight=None,
missing=nan, monotone_constraints=None,
n_estimators=100, n_jobs=None,
num_parallel_tree=None, predictor=None,
random_state=None, ...),
max_features=207, threshold=-inf), 'feature_selection__estimator__learning_rate': 0.5, 'feature_selection__estimator__max_depth': 3, 'feature_selection__estimator__n_estimators': 100, 'feature_selection__max_features': 1034}"	42	0.7072	0.0317678
100_SelectFromModel(estimator=XGBClassifier(base_score=None, booster=None,
callbacks=None, colsample_bylevel=None,
colsample_bynode=None,
colsample_bytree=None,
early_stopping_rounds=None,
enable_categorical=False,
eval_metric=None, feature_types=None,
gamma=None, gpu_id=None,
grow_policy=None, importance_type=None,
interaction_constraints=None,
learning_rate=0.5, max_bin=None,
max_cat_threshold=None,
max_cat_to_onehot=None,
max_delta_step=None, max_depth=3,
max_leaves=None, min_child_weight=None,
missing=nan, monotone_constraints=None,
n_estimators=100, n_jobs=None,
num_parallel_tree=None, predictor=None,
random_state=None, ...),
max_features=207, threshold=-inf)_0.5_3_500_1378"	{'classify__C': 100, 'feature_selection': SelectFromModel(estimator=XGBClassifier(base_score=None, booster=None,
callbacks=None, colsample_bylevel=None,
colsample_bynode=None,
colsample_bytree=None,
early_stopping_rounds=None,
enable_categorical=False,
eval_metric=None, feature_types=None,
gamma=None, gpu_id=None,
grow_policy=None, importance_type=None,
interaction_constraints=None,
learning_rate=0.5, max_bin=None,
max_cat_threshold=None,
max_cat_to_onehot=None,
max_delta_step=None, max_depth=3,
max_leaves=None, min_child_weight=None,
missing=nan, monotone_constraints=None,
n_estimators=100, n_jobs=None,
num_parallel_tree=None, predictor=None,
random_state=None, ...),
max_features=207, threshold=-inf), 'feature_selection__estimator__learning_rate': 0.5, 'feature_selection__estimator__max_depth': 3, 'feature_selection__estimator__n_estimators': 500, 'feature_selection__max_features': 1378}"	43	0.70629	0.0384219
200_SelectFromModel(estimator=XGBClassifier(base_score=None, booster=None,
callbacks=None, colsample_bylevel=None,
colsample_bynode=None,
colsample_bytree=None,
early_stopping_rounds=None,
enable_categorical=False,
eval_metric=None, feature_types=None,
gamma=None, gpu_id=None,
grow_policy=None, importance_type=None,
interaction_constraints=None,
learning_rate=0.5, max_bin=None,
max_cat_threshold=None,
max_cat_to_onehot=None,
max_delta_step=None, max_depth=3,
max_leaves=None, min_child_weight=None,
missing=nan, monotone_constraints=None,
n_estimators=100, n_jobs=None,
num_parallel_tree=None, predictor=None,
random_state=None, ...),
max_features=207, threshold=-inf)_0.1_3_500_1378"	{'classify__C': 200, 'feature_selection': SelectFromModel(estimator=XGBClassifier(base_score=None, booster=None,
callbacks=None, colsample_bylevel=None,
colsample_bynode=None,
colsample_bytree=None,
early_stopping_rounds=None,
enable_categorical=False,
eval_metric=None, feature_types=None,
gamma=None, gpu_id=None,
grow_policy=None, importance_type=None,
interaction_constraints=None,
learning_rate=0.5, max_bin=None,
max_cat_threshold=None,
max_cat_to_onehot=None,
max_delta_step=None, max_depth=3,
max_leaves=None, min_child_weight=None,
missing=nan, monotone_constraints=None,
n_estimators=100, n_jobs=None,
num_parallel_tree=None, predictor=None,
random_state=None, ...),
max_features=207, threshold=-inf), 'feature_selection__estimator__learning_rate': 0.1, 'feature_selection__estimator__max_depth': 3, 'feature_selection__estimator__n_estimators': 500, 'feature_selection__max_features': 1378}"	44	0.705968	0.0168245
200_SelectFromModel(estimator=XGBClassifier(base_score=None, booster=None,
callbacks=None, colsample_bylevel=None,
colsample_bynode=None,
colsample_bytree=None,
early_stopping_rounds=None,
enable_categorical=False,
eval_metric=None, feature_types=None,
gamma=None, gpu_id=None,
grow_policy=None, importance_type=None,
interaction_constraints=None,
learning_rate=0.5, max_bin=None,
max_cat_threshold=None,
max_cat_to_onehot=None,
max_delta_step=None, max_depth=3,
max_leaves=None, min_child_weight=None,
missing=nan, monotone_constraints=None,
n_estimators=100, n_jobs=None,
num_parallel_tree=None, predictor=None,
random_state=None, ...),
max_features=207, threshold=-inf)_0.1_3_250_1378"	{'classify__C': 200, 'feature_selection': SelectFromModel(estimator=XGBClassifier(base_score=None, booster=None,
callbacks=None, colsample_bylevel=None,
colsample_bynode=None,
colsample_bytree=None,
early_stopping_rounds=None,
enable_categorical=False,
eval_metric=None, feature_types=None,
gamma=None, gpu_id=None,
grow_policy=None, importance_type=None,
interaction_constraints=None,
learning_rate=0.5, max_bin=None,
max_cat_threshold=None,
max_cat_to_onehot=None,
max_delta_step=None, max_depth=3,
max_leaves=None, min_child_weight=None,
missing=nan, monotone_constraints=None,
n_estimators=100, n_jobs=None,
num_parallel_tree=None, predictor=None,
random_state=None, ...),
max_features=207, threshold=-inf), 'feature_selection__estimator__learning_rate': 0.1, 'feature_selection__estimator__max_depth': 3, 'feature_selection__estimator__n_estimators': 250, 'feature_selection__max_features': 1378}"	45	0.705799	0.0176606
200_SelectFromModel(estimator=XGBClassifier(base_score=None, booster=None,
callbacks=None, colsample_bylevel=None,
colsample_bynode=None,
colsample_bytree=None,
early_stopping_rounds=None,
enable_categorical=False,
eval_metric=None, feature_types=None,
gamma=None, gpu_id=None,
grow_policy=None, importance_type=None,
interaction_constraints=None,
learning_rate=0.5, max_bin=None,
max_cat_threshold=None,
max_cat_to_onehot=None,
max_delta_step=None, max_depth=3,
max_leaves=None, min_child_weight=None,
missing=nan, monotone_constraints=None,
n_estimators=100, n_jobs=None,
num_parallel_tree=None, predictor=None,
random_state=None, ...),
max_features=207, threshold=-inf)_0.3_3_100_1378"	{'classify__C': 200, 'feature_selection': SelectFromModel(estimator=XGBClassifier(base_score=None, booster=None,
callbacks=None, colsample_bylevel=None,
colsample_bynode=None,
colsample_bytree=None,
early_stopping_rounds=None,
enable_categorical=False,
eval_metric=None, feature_types=None,
gamma=None, gpu_id=None,
grow_policy=None, importance_type=None,
interaction_constraints=None,
learning_rate=0.5, max_bin=None,
max_cat_threshold=None,
max_cat_to_onehot=None,
max_delta_step=None, max_depth=3,
max_leaves=None, min_child_weight=None,
missing=nan, monotone_constraints=None,
n_estimators=100, n_jobs=None,
num_parallel_tree=None, predictor=None,
random_state=None, ...),
max_features=207, threshold=-inf), 'feature_selection__estimator__learning_rate': 0.3, 'feature_selection__estimator__max_depth': 3, 'feature_selection__estimator__n_estimators': 100, 'feature_selection__max_features': 1378}"	46	0.705617	0.0265059
200_SelectFromModel(estimator=XGBClassifier(base_score=None, booster=None,
callbacks=None, colsample_bylevel=None,
colsample_bynode=None,
colsample_bytree=None,
early_stopping_rounds=None,
enable_categorical=False,
eval_metric=None, feature_types=None,
gamma=None, gpu_id=None,
grow_policy=None, importance_type=None,
interaction_constraints=None,
learning_rate=0.5, max_bin=None,
max_cat_threshold=None,
max_cat_to_onehot=None,
max_delta_step=None, max_depth=3,
max_leaves=None, min_child_weight=None,
missing=nan, monotone_constraints=None,
n_estimators=100, n_jobs=None,
num_parallel_tree=None, predictor=None,
random_state=None, ...),
max_features=207, threshold=-inf)_0.3_3_100_517"	{'classify__C': 200, 'feature_selection': SelectFromModel(estimator=XGBClassifier(base_score=None, booster=None,
callbacks=None, colsample_bylevel=None,
colsample_bynode=None,
colsample_bytree=None,
early_stopping_rounds=None,
enable_categorical=False,
eval_metric=None, feature_types=None,
gamma=None, gpu_id=None,
grow_policy=None, importance_type=None,
interaction_constraints=None,
learning_rate=0.5, max_bin=None,
max_cat_threshold=None,
max_cat_to_onehot=None,
max_delta_step=None, max_depth=3,
max_leaves=None, min_child_weight=None,
missing=nan, monotone_constraints=None,
n_estimators=100, n_jobs=None,
num_parallel_tree=None, predictor=None,
random_state=None, ...),
max_features=207, threshold=-inf), 'feature_selection__estimator__learning_rate': 0.3, 'feature_selection__estimator__max_depth': 3, 'feature_selection__estimator__n_estimators': 100, 'feature_selection__max_features': 517}"	47	0.704992	0.0392092
200_SelectFromModel(estimator=XGBClassifier(base_score=None, booster=None,
callbacks=None, colsample_bylevel=None,
colsample_bynode=None,
colsample_bytree=None,
early_stopping_rounds=None,
enable_categorical=False,
eval_metric=None, feature_types=None,
gamma=None, gpu_id=None,
grow_policy=None, importance_type=None,
interaction_constraints=None,
learning_rate=0.5, max_bin=None,
max_cat_threshold=None,
max_cat_to_onehot=None,
max_delta_step=None, max_depth=3,
max_leaves=None, min_child_weight=None,
missing=nan, monotone_constraints=None,
n_estimators=100, n_jobs=None,
num_parallel_tree=None, predictor=None,
random_state=None, ...),
max_features=207, threshold=-inf)_0.3_5_500_1378"	{'classify__C': 200, 'feature_selection': SelectFromModel(estimator=XGBClassifier(base_score=None, booster=None,
callbacks=None, colsample_bylevel=None,
colsample_bynode=None,
colsample_bytree=None,
early_stopping_rounds=None,
enable_categorical=False,
eval_metric=None, feature_types=None,
gamma=None, gpu_id=None,
grow_policy=None, importance_type=None,
interaction_constraints=None,
learning_rate=0.5, max_bin=None,
max_cat_threshold=None,
max_cat_to_onehot=None,
max_delta_step=None, max_depth=3,
max_leaves=None, min_child_weight=None,
missing=nan, monotone_constraints=None,
n_estimators=100, n_jobs=None,
num_parallel_tree=None, predictor=None,
random_state=None, ...),
max_features=207, threshold=-inf), 'feature_selection__estimator__learning_rate': 0.3, 'feature_selection__estimator__max_depth': 5, 'feature_selection__estimator__n_estimators': 500, 'feature_selection__max_features': 1378}"	48	0.704936	0.0200458
10_SelectFromModel(estimator=XGBClassifier(base_score=None, booster=None,
callbacks=None, colsample_bylevel=None,
colsample_bynode=None,
colsample_bytree=None,
early_stopping_rounds=None,
enable_categorical=False,
eval_metric=None, feature_types=None,
gamma=None, gpu_id=None,
grow_policy=None, importance_type=None,
interaction_constraints=None,
learning_rate=0.5, max_bin=None,
max_cat_threshold=None,
max_cat_to_onehot=None,
max_delta_step=None, max_depth=3,
max_leaves=None, min_child_weight=None,
missing=nan, monotone_constraints=None,
n_estimators=100, n_jobs=None,
num_parallel_tree=None, predictor=None,
random_state=None, ...),
max_features=207, threshold=-inf)_0.5_3_100_517"	{'classify__C': 10, 'feature_selection': SelectFromModel(estimator=XGBClassifier(base_score=None, booster=None,
callbacks=None, colsample_bylevel=None,
colsample_bynode=None,
colsample_bytree=None,
early_stopping_rounds=None,
enable_categorical=False,
eval_metric=None, feature_types=None,
gamma=None, gpu_id=None,
grow_policy=None, importance_type=None,
interaction_constraints=None,
learning_rate=0.5, max_bin=None,
max_cat_threshold=None,
max_cat_to_onehot=None,
max_delta_step=None, max_depth=3,
max_leaves=None, min_child_weight=None,
missing=nan, monotone_constraints=None,
n_estimators=100, n_jobs=None,
num_parallel_tree=None, predictor=None,
random_state=None, ...),
max_features=207, threshold=-inf), 'feature_selection__estimator__learning_rate': 0.5, 'feature_selection__estimator__max_depth': 3, 'feature_selection__estimator__n_estimators': 100, 'feature_selection__max_features': 517}"	49	0.704889	0.0363541
200_SelectFromModel(estimator=XGBClassifier(base_score=None, booster=None,
callbacks=None, colsample_bylevel=None,
colsample_bynode=None,
colsample_bytree=None,
early_stopping_rounds=None,
enable_categorical=False,
eval_metric=None, feature_types=None,
gamma=None, gpu_id=None,
grow_policy=None, importance_type=None,
interaction_constraints=None,
learning_rate=0.5, max_bin=None,
max_cat_threshold=None,
max_cat_to_onehot=None,
max_delta_step=None, max_depth=3,
max_leaves=None, min_child_weight=None,
missing=nan, monotone_constraints=None,
n_estimators=100, n_jobs=None,
num_parallel_tree=None, predictor=None,
random_state=None, ...),
max_features=207, threshold=-inf)_0.3_3_250_1378"	{'classify__C': 200, 'feature_selection': SelectFromModel(estimator=XGBClassifier(base_score=None, booster=None,
callbacks=None, colsample_bylevel=None,
colsample_bynode=None,
colsample_bytree=None,
early_stopping_rounds=None,
enable_categorical=False,
eval_metric=None, feature_types=None,
gamma=None, gpu_id=None,
grow_policy=None, importance_type=None,
interaction_constraints=None,
learning_rate=0.5, max_bin=None,
max_cat_threshold=None,
max_cat_to_onehot=None,
max_delta_step=None, max_depth=3,
max_leaves=None, min_child_weight=None,
missing=nan, monotone_constraints=None,
n_estimators=100, n_jobs=None,
num_parallel_tree=None, predictor=None,
random_state=None, ...),
max_features=207, threshold=-inf), 'feature_selection__estimator__learning_rate': 0.3, 'feature_selection__estimator__max_depth': 3, 'feature_selection__estimator__n_estimators': 250, 'feature_selection__max_features': 1378}"	50	0.704306	0.0278208
100_SelectFromModel(estimator=XGBClassifier(base_score=None, booster=None,
callbacks=None, colsample_bylevel=None,
colsample_bynode=None,
colsample_bytree=None,
early_stopping_rounds=None,
enable_categorical=False,
eval_metric=None, feature_types=None,
gamma=None, gpu_id=None,
grow_policy=None, importance_type=None,
interaction_constraints=None,
learning_rate=0.5, max_bin=None,
max_cat_threshold=None,
max_cat_to_onehot=None,
max_delta_step=None, max_depth=3,
max_leaves=None, min_child_weight=None,
missing=nan, monotone_constraints=None,
n_estimators=100, n_jobs=None,
num_parallel_tree=None, predictor=None,
random_state=None, ...),
max_features=207, threshold=-inf)_0.3_3_100_517"	{'classify__C': 100, 'feature_selection': SelectFromModel(estimator=XGBClassifier(base_score=None, booster=None,
callbacks=None, colsample_bylevel=None,
colsample_bynode=None,
colsample_bytree=None,
early_stopping_rounds=None,
enable_categorical=False,
eval_metric=None, feature_types=None,
gamma=None, gpu_id=None,
grow_policy=None, importance_type=None,
interaction_constraints=None,
learning_rate=0.5, max_bin=None,
max_cat_threshold=None,
max_cat_to_onehot=None,
max_delta_step=None, max_depth=3,
max_leaves=None, min_child_weight=None,
missing=nan, monotone_constraints=None,
n_estimators=100, n_jobs=None,
num_parallel_tree=None, predictor=None,
random_state=None, ...),
max_features=207, threshold=-inf), 'feature_selection__estimator__learning_rate': 0.3, 'feature_selection__estimator__max_depth': 3, 'feature_selection__estimator__n_estimators': 100, 'feature_selection__max_features': 517}"	51	0.703857	0.0363106
200_SelectFromModel(estimator=XGBClassifier(base_score=None, booster=None,
callbacks=None, colsample_bylevel=None,
colsample_bynode=None,
colsample_bytree=None,
early_stopping_rounds=None,
enable_categorical=False,
eval_metric=None, feature_types=None,
gamma=None, gpu_id=None,
grow_policy=None, importance_type=None,
interaction_constraints=None,
[truncated: 13,796 more rows]

## Sheet: Logit_SVC_Dmodels_perfomances
	model_1	model_2	t_stat	p_val	worse_prob	better_prob	rope_prob
0	10_SelectFromModel(estimator=LogisticRegression(max_iter=10000, multi_class='ovr',
n_jobs=-1, penalty='l1',
random_state=42, solver='saga'),
max_features=1406, threshold=-inf)_1406"	10_SelectFromModel(estimator=LogisticRegression(max_iter=10000, multi_class='ovr',
n_jobs=-1, penalty='l1',
random_state=42, solver='saga'),
max_features=1406, threshold=-inf)_1054"	4.716	0.104	0	0.758	0.242
1	10_SelectFromModel(estimator=LogisticRegression(max_iter=10000, multi_class='ovr',
n_jobs=-1, penalty='l1',
random_state=42, solver='saga'),
max_features=1406, threshold=-inf)_1406"	100_SelectFromModel(estimator=LogisticRegression(max_iter=10000, multi_class='ovr',
n_jobs=-1, penalty='l1',
random_state=42, solver='saga'),
max_features=1406, threshold=-inf)_1406"	4.699	0.107	0	0.852	0.148
2	10_SelectFromModel(estimator=LogisticRegression(max_iter=10000, multi_class='ovr',
n_jobs=-1, penalty='l1',
random_state=42, solver='saga'),
max_features=1406, threshold=-inf)_1406"	200_SelectFromModel(estimator=LogisticRegression(max_iter=10000, multi_class='ovr',
n_jobs=-1, penalty='l1',
random_state=42, solver='saga'),
max_features=1406, threshold=-inf)_1406"	4.699	0.107	0	0.852	0.148
3	10_SelectFromModel(estimator=LogisticRegression(max_iter=10000, multi_class='ovr',
n_jobs=-1, penalty='l1',
random_state=42, solver='saga'),
max_features=1406, threshold=-inf)_1406"	10_SelectFromModel(estimator=LogisticRegression(max_iter=10000, multi_class='ovr',
n_jobs=-1, penalty='l1',
random_state=42, solver='saga'),
max_features=1406, threshold=-inf)_527"	3.079	1	0	0.879	0.12
4	10_SelectFromModel(estimator=LogisticRegression(max_iter=10000, multi_class='ovr',
n_jobs=-1, penalty='l1',
random_state=42, solver='saga'),
max_features=1406, threshold=-inf)_1406"	100_SelectFromModel(estimator=LogisticRegression(max_iter=10000, multi_class='ovr',
n_jobs=-1, penalty='l1',
random_state=42, solver='saga'),
max_features=1406, threshold=-inf)_1054"	5.53	0.035	0	0.995	0.005
5	10_SelectFromModel(estimator=LogisticRegression(max_iter=10000, multi_class='ovr',
n_jobs=-1, penalty='l1',
random_state=42, solver='saga'),
max_features=1406, threshold=-inf)_1406"	200_SelectFromModel(estimator=LogisticRegression(max_iter=10000, multi_class='ovr',
n_jobs=-1, penalty='l1',
random_state=42, solver='saga'),
max_features=1406, threshold=-inf)_1054"	5.594	0.032	0	0.996	0.004
6	10_SelectFromModel(estimator=LogisticRegression(max_iter=10000, multi_class='ovr',
n_jobs=-1, penalty='l1',
random_state=42, solver='saga'),
max_features=1406, threshold=-inf)_1406"	10_SelectFromModel(estimator=LogisticRegression(max_iter=10000, multi_class='ovr',
n_jobs=-1, penalty='l1',
random_state=42, solver='saga'),
max_features=1406, threshold=-inf)_422"	4.581	0.126	0	0.995	0.005
7	10_SelectFromModel(estimator=LogisticRegression(max_iter=10000, multi_class='ovr',
n_jobs=-1, penalty='l1',
random_state=42, solver='saga'),
max_features=1406, threshold=-inf)_1406"	100_SelectFromModel(estimator=LogisticRegression(max_iter=10000, multi_class='ovr',
n_jobs=-1, penalty='l1',
random_state=42, solver='saga'),
max_features=1406, threshold=-inf)_527"	5.794	0.025	0	0.999	0.001
8	10_SelectFromModel(estimator=LogisticRegression(max_iter=10000, multi_class='ovr',
n_jobs=-1, penalty='l1',
random_state=42, solver='saga'),
max_features=1406, threshold=-inf)_1406"	200_SelectFromModel(estimator=LogisticRegression(max_iter=10000, multi_class='ovr',
n_jobs=-1, penalty='l1',
random_state=42, solver='saga'),
max_features=1406, threshold=-inf)_527"	5.826	0.024	0	0.999	0.001
9	10_SelectFromModel(estimator=LogisticRegression(max_iter=10000, multi_class='ovr',
n_jobs=-1, penalty='l1',
random_state=42, solver='saga'),
max_features=1406, threshold=-inf)_1406"	100_SelectFromModel(estimator=LogisticRegression(max_iter=10000, multi_class='ovr',
n_jobs=-1, penalty='l1',
random_state=42, solver='saga'),
max_features=1406, threshold=-inf)_422"	6.071	0.018	0	0.999	0
10	10_SelectFromModel(estimator=LogisticRegression(max_iter=10000, multi_class='ovr',
n_jobs=-1, penalty='l1',
random_state=42, solver='saga'),
max_features=1406, threshold=-inf)_1406"	200_SelectFromModel(estimator=LogisticRegression(max_iter=10000, multi_class='ovr',
n_jobs=-1, penalty='l1',
random_state=42, solver='saga'),
max_features=1406, threshold=-inf)_422"	6.536	0.01	0	1	0
11	10_SelectFromModel(estimator=LogisticRegression(max_iter=10000, multi_class='ovr',
n_jobs=-1, penalty='l1',
random_state=42, solver='saga'),
max_features=1406, threshold=-inf)_1406"	10_SelectFromModel(estimator=LogisticRegression(max_iter=10000, multi_class='ovr',
n_jobs=-1, penalty='l1',
random_state=42, solver='saga'),
max_features=1406, threshold=-inf)_211"	15.643	0	0	1	0
12	10_SelectFromModel(estimator=LogisticRegression(max_iter=10000, multi_class='ovr',
n_jobs=-1, penalty='l1',
random_state=42, solver='saga'),
max_features=1406, threshold=-inf)_1406"	1_SelectFromModel(estimator=LogisticRegression(max_iter=10000, multi_class='ovr',
n_jobs=-1, penalty='l1',
random_state=42, solver='saga'),
max_features=1406, threshold=-inf)_527"	17.565	0	0	1	0
13	10_SelectFromModel(estimator=LogisticRegression(max_iter=10000, multi_class='ovr',
n_jobs=-1, penalty='l1',
random_state=42, solver='saga'),
max_features=1406, threshold=-inf)_1406"	1_SelectFromModel(estimator=LogisticRegression(max_iter=10000, multi_class='ovr',
n_jobs=-1, penalty='l1',
random_state=42, solver='saga'),
max_features=1406, threshold=-inf)_422"	18.364	0	0	1	0
14	10_SelectFromModel(estimator=LogisticRegression(max_iter=10000, multi_class='ovr',
n_jobs=-1, penalty='l1',
random_state=42, solver='saga'),
max_features=1406, threshold=-inf)_1406"	100_SelectFromModel(estimator=LogisticRegression(max_iter=10000, multi_class='ovr',
n_jobs=-1, penalty='l1',
random_state=42, solver='saga'),
max_features=1406, threshold=-inf)_211"	21.526	0	0	1	0
15	10_SelectFromModel(estimator=LogisticRegression(max_iter=10000, multi_class='ovr',
n_jobs=-1, penalty='l1',
random_state=42, solver='saga'),
max_features=1406, threshold=-inf)_1406"	200_SelectFromModel(estimator=LogisticRegression(max_iter=10000, multi_class='ovr',
n_jobs=-1, penalty='l1',
random_state=42, solver='saga'),
max_features=1406, threshold=-inf)_211"	25.763	0	0	1	0
16	10_SelectFromModel(estimator=LogisticRegression(max_iter=10000, multi_class='ovr',
n_jobs=-1, penalty='l1',
random_state=42, solver='saga'),
max_features=1406, threshold=-inf)_1406"	1_SelectFromModel(estimator=LogisticRegression(max_iter=10000, multi_class='ovr',
n_jobs=-1, penalty='l1',
random_state=42, solver='saga'),
max_features=1406, threshold=-inf)_1054"	21.237	0	0	1	0
17	10_SelectFromModel(estimator=LogisticRegression(max_iter=10000, multi_class='ovr',
n_jobs=-1, penalty='l1',
random_state=42, solver='saga'),
max_features=1406, threshold=-inf)_1406"	1_SelectFromModel(estimator=LogisticRegression(max_iter=10000, multi_class='ovr',
n_jobs=-1, penalty='l1',
random_state=42, solver='saga'),
max_features=1406, threshold=-inf)_211"	23.287	0	0	1	0
18	10_SelectFromModel(estimator=LogisticRegression(max_iter=10000, multi_class='ovr',
n_jobs=-1, penalty='l1',
random_state=42, solver='saga'),
max_features=1406, threshold=-inf)_1406"	1_SelectFromModel(estimator=LogisticRegression(max_iter=10000, multi_class='ovr',
n_jobs=-1, penalty='l1',
random_state=42, solver='saga'),
max_features=1406, threshold=-inf)_1406"	16.257	0	0	1	0
19	10_SelectFromModel(estimator=LogisticRegression(max_iter=10000, multi_class='ovr',
n_jobs=-1, penalty='l1',
random_state=42, solver='saga'),
max_features=1406, threshold=-inf)_1054"	100_SelectFromModel(estimator=LogisticRegression(max_iter=10000, multi_class='ovr',
n_jobs=-1, penalty='l1',
random_state=42, solver='saga'),
max_features=1406, threshold=-inf)_1406"	0.611	1	0	0.001	0.999
20	10_SelectFromModel(estimator=LogisticRegression(max_iter=10000, multi_class='ovr',
n_jobs=-1, penalty='l1',
random_state=42, solver='saga'),
max_features=1406, threshold=-inf)_1054"	200_SelectFromModel(estimator=LogisticRegression(max_iter=10000, multi_class='ovr',
n_jobs=-1, penalty='l1',
random_state=42, solver='saga'),
max_features=1406, threshold=-inf)_1406"	0.611	1	0	0.001	0.999
21	10_SelectFromModel(estimator=LogisticRegression(max_iter=10000, multi_class='ovr',
n_jobs=-1, penalty='l1',
random_state=42, solver='saga'),
max_features=1406, threshold=-inf)_1054"	10_SelectFromModel(estimator=LogisticRegression(max_iter=10000, multi_class='ovr',
n_jobs=-1, penalty='l1',
random_state=42, solver='saga'),
max_features=1406, threshold=-inf)_527"	1.261	1	0.002	0.123	0.874
22	10_SelectFromModel(estimator=LogisticRegression(max_iter=10000, multi_class='ovr',
n_jobs=-1, penalty='l1',
random_state=42, solver='saga'),
max_features=1406, threshold=-inf)_1054"	100_SelectFromModel(estimator=LogisticRegression(max_iter=10000, multi_class='ovr',
n_jobs=-1, penalty='l1',
random_state=42, solver='saga'),
max_features=1406, threshold=-inf)_1054"	3.954	0.317	0	0.803	0.197
23	10_SelectFromModel(estimator=LogisticRegression(max_iter=10000, multi_class='ovr',
n_jobs=-1, penalty='l1',
random_state=42, solver='saga'),
max_features=1406, threshold=-inf)_1054"	200_SelectFromModel(estimator=LogisticRegression(max_iter=10000, multi_class='ovr',
n_jobs=-1, penalty='l1',
random_state=42, solver='saga'),
max_features=1406, threshold=-inf)_1054"	4	0.296	0	0.829	0.171
24	10_SelectFromModel(estimator=LogisticRegression(max_iter=10000, multi_class='ovr',
n_jobs=-1, penalty='l1',
random_state=42, solver='saga'),
max_features=1406, threshold=-inf)_1054"	10_SelectFromModel(estimator=LogisticRegression(max_iter=10000, multi_class='ovr',
n_jobs=-1, penalty='l1',
random_state=42, solver='saga'),
max_features=1406, threshold=-inf)_422"	3.568	0.574	0	0.961	0.039
25	10_SelectFromModel(estimator=LogisticRegression(max_iter=10000, multi_class='ovr',
n_jobs=-1, penalty='l1',
random_state=42, solver='saga'),
max_features=1406, threshold=-inf)_1054"	100_SelectFromModel(estimator=LogisticRegression(max_iter=10000, multi_class='ovr',
n_jobs=-1, penalty='l1',
random_state=42, solver='saga'),
max_features=1406, threshold=-inf)_527"	4.656	0.113	0	0.988	0.012
26	10_SelectFromModel(estimator=LogisticRegression(max_iter=10000, multi_class='ovr',
n_jobs=-1, penalty='l1',
random_state=42, solver='saga'),
max_features=1406, threshold=-inf)_1054"	200_SelectFromModel(estimator=LogisticRegression(max_iter=10000, multi_class='ovr',
n_jobs=-1, penalty='l1',
random_state=42, solver='saga'),
max_features=1406, threshold=-inf)_527"	4.848	0.087	0	0.991	0.009
27	10_SelectFromModel(estimator=LogisticRegression(max_iter=10000, multi_class='ovr',
n_jobs=-1, penalty='l1',
random_state=42, solver='saga'),
max_features=1406, threshold=-inf)_1054"	100_SelectFromModel(estimator=LogisticRegression(max_iter=10000, multi_class='ovr',
n_jobs=-1, penalty='l1',
random_state=42, solver='saga'),
max_features=1406, threshold=-inf)_422"	4.608	0.121	0	0.995	0.005
28	10_SelectFromModel(estimator=LogisticRegression(max_iter=10000, multi_class='ovr',
n_jobs=-1, penalty='l1',
random_state=42, solver='saga'),
max_features=1406, threshold=-inf)_1054"	200_SelectFromModel(estimator=LogisticRegression(max_iter=10000, multi_class='ovr',
n_jobs=-1, penalty='l1',
random_state=42, solver='saga'),
max_features=1406, threshold=-inf)_422"	5.085	0.063	0	0.998	0.002
29	10_SelectFromModel(estimator=LogisticRegression(max_iter=10000, multi_class='ovr',
n_jobs=-1, penalty='l1',
random_state=42, solver='saga'),
max_features=1406, threshold=-inf)_1054"	10_SelectFromModel(estimator=LogisticRegression(max_iter=10000, multi_class='ovr',
n_jobs=-1, penalty='l1',
random_state=42, solver='saga'),
max_features=1406, threshold=-inf)_211"	13.505	0	0	1	0
30	10_SelectFromModel(estimator=LogisticRegression(max_iter=10000, multi_class='ovr',
n_jobs=-1, penalty='l1',
random_state=42, solver='saga'),
max_features=1406, threshold=-inf)_1054"	1_SelectFromModel(estimator=LogisticRegression(max_iter=10000, multi_class='ovr',
n_jobs=-1, penalty='l1',
random_state=42, solver='saga'),
max_features=1406, threshold=-inf)_527"	16.304	0	0	1	0
31	10_SelectFromModel(estimator=LogisticRegression(max_iter=10000, multi_class='ovr',
n_jobs=-1, penalty='l1',
random_state=42, solver='saga'),
max_features=1406, threshold=-inf)_1054"	1_SelectFromModel(estimator=LogisticRegression(max_iter=10000, multi_class='ovr',
n_jobs=-1, penalty='l1',
random_state=42, solver='saga'),
max_features=1406, threshold=-inf)_422"	15.244	0	0	1	0
32	10_SelectFromModel(estimator=LogisticRegression(max_iter=10000, multi_class='ovr',
n_jobs=-1, penalty='l1',
random_state=42, solver='saga'),
max_features=1406, threshold=-inf)_1054"	100_SelectFromModel(estimator=LogisticRegression(max_iter=10000, multi_class='ovr',
n_jobs=-1, penalty='l1',
random_state=42, solver='saga'),
max_features=1406, threshold=-inf)_211"	18.824	0	0	1	0
33	10_SelectFromModel(estimator=LogisticRegression(max_iter=10000, multi_class='ovr',
n_jobs=-1, penalty='l1',
random_state=42, solver='saga'),
max_features=1406, threshold=-inf)_1054"	200_SelectFromModel(estimator=LogisticRegression(max_iter=10000, multi_class='ovr',
n_jobs=-1, penalty='l1',
random_state=42, solver='saga'),
max_features=1406, threshold=-inf)_211"	22.651	0	0	1	0
34	10_SelectFromModel(estimator=LogisticRegression(max_iter=10000, multi_class='ovr',
n_jobs=-1, penalty='l1',
random_state=42, solver='saga'),
max_features=1406, threshold=-inf)_1054"	1_SelectFromModel(estimator=LogisticRegression(max_iter=10000, multi_class='ovr',
n_jobs=-1, penalty='l1',
random_state=42, solver='saga'),
max_features=1406, threshold=-inf)_1054"	18.269	0	0	1	0
35	10_SelectFromModel(estimator=LogisticRegression(max_iter=10000, multi_class='ovr',
n_jobs=-1, penalty='l1',
random_state=42, solver='saga'),
max_features=1406, threshold=-inf)_1054"	1_SelectFromModel(estimator=LogisticRegression(max_iter=10000, multi_class='ovr',
n_jobs=-1, penalty='l1',
random_state=42, solver='saga'),
max_features=1406, threshold=-inf)_211"	22.499	0	0	1	0
36	10_SelectFromModel(estimator=LogisticRegression(max_iter=10000, multi_class='ovr',
n_jobs=-1, penalty='l1',
random_state=42, solver='saga'),
max_features=1406, threshold=-inf)_1054"	1_SelectFromModel(estimator=LogisticRegression(max_iter=10000, multi_class='ovr',
n_jobs=-1, penalty='l1',
random_state=42, solver='saga'),
max_features=1406, threshold=-inf)_1406"	13.954	0	0	1	0
37	100_SelectFromModel(estimator=LogisticRegression(max_iter=10000, multi_class='ovr',
n_jobs=-1, penalty='l1',
random_state=42, solver='saga'),
max_features=1406, threshold=-inf)_1406"	200_SelectFromModel(estimator=LogisticRegression(max_iter=10000, multi_class='ovr',
n_jobs=-1, penalty='l1',
random_state=42, solver='saga'),
max_features=1406, threshold=-inf)_1406"
38	100_SelectFromModel(estimator=LogisticRegression(max_iter=10000, multi_class='ovr',
n_jobs=-1, penalty='l1',
random_state=42, solver='saga'),
max_features=1406, threshold=-inf)_1406"	10_SelectFromModel(estimator=LogisticRegression(max_iter=10000, multi_class='ovr',
n_jobs=-1, penalty='l1',
random_state=42, solver='saga'),
max_features=1406, threshold=-inf)_527"	0.68	1	0.017	0.146	0.837
39	100_SelectFromModel(estimator=LogisticRegression(max_iter=10000, multi_class='ovr',
n_jobs=-1, penalty='l1',
random_state=42, solver='saga'),
max_features=1406, threshold=-inf)_1406"	100_SelectFromModel(estimator=LogisticRegression(max_iter=10000, multi_class='ovr',
n_jobs=-1, penalty='l1',
random_state=42, solver='saga'),
max_features=1406, threshold=-inf)_1054"	3.577	0.566	0	0.689	0.311
40	100_SelectFromModel(estimator=LogisticRegression(max_iter=10000, multi_class='ovr',
n_jobs=-1, penalty='l1',
random_state=42, solver='saga'),
max_features=1406, threshold=-inf)_1406"	200_SelectFromModel(estimator=LogisticRegression(max_iter=10000, multi_class='ovr',
n_jobs=-1, penalty='l1',
random_state=42, solver='saga'),
max_features=1406, threshold=-inf)_1054"	3.577	0.566	0	0.724	0.276
41	100_SelectFromModel(estimator=LogisticRegression(max_iter=10000, multi_class='ovr',
n_jobs=-1, penalty='l1',
random_state=42, solver='saga'),
max_features=1406, threshold=-inf)_1406"	10_SelectFromModel(estimator=LogisticRegression(max_iter=10000, multi_class='ovr',
n_jobs=-1, penalty='l1',
random_state=42, solver='saga'),
max_features=1406, threshold=-inf)_422"	3.216	1	0.001	0.939	0.061
42	100_SelectFromModel(estimator=LogisticRegression(max_iter=10000, multi_class='ovr',
n_jobs=-1, penalty='l1',
random_state=42, solver='saga'),
max_features=1406, threshold=-inf)_1406"	100_SelectFromModel(estimator=LogisticRegression(max_iter=10000, multi_class='ovr',
n_jobs=-1, penalty='l1',
random_state=42, solver='saga'),
max_features=1406, threshold=-inf)_527"	3.745	0.436	0	0.966	0.034
43	100_SelectFromModel(estimator=LogisticRegression(max_iter=10000, multi_class='ovr',
n_jobs=-1, penalty='l1',
random_state=42, solver='saga'),
max_features=1406, threshold=-inf)_1406"	200_SelectFromModel(estimator=LogisticRegression(max_iter=10000, multi_class='ovr',
n_jobs=-1, penalty='l1',
random_state=42, solver='saga'),
max_features=1406, threshold=-inf)_527"	3.786	0.409	0	0.971	0.029
44	100_SelectFromModel(estimator=LogisticRegression(max_iter=10000, multi_class='ovr',
n_jobs=-1, penalty='l1',
random_state=42, solver='saga'),
max_features=1406, threshold=-inf)_1406"	100_SelectFromModel(estimator=LogisticRegression(max_iter=10000, multi_class='ovr',
n_jobs=-1, penalty='l1',
random_state=42, solver='saga'),
max_features=1406, threshold=-inf)_422"	4.479	0.146	0	0.994	0.006
45	100_SelectFromModel(estimator=LogisticRegression(max_iter=10000, multi_class='ovr',
n_jobs=-1, penalty='l1',
random_state=42, solver='saga'),
max_features=1406, threshold=-inf)_1406"	200_SelectFromModel(estimator=LogisticRegression(max_iter=10000, multi_class='ovr',
n_jobs=-1, penalty='l1',
random_state=42, solver='saga'),
max_features=1406, threshold=-inf)_422"	4.983	0.072	0	0.997	0.003
46	100_SelectFromModel(estimator=LogisticRegression(max_iter=10000, multi_class='ovr',
n_jobs=-1, penalty='l1',
random_state=42, solver='saga'),
max_features=1406, threshold=-inf)_1406"	10_SelectFromModel(estimator=LogisticRegression(max_iter=10000, multi_class='ovr',
n_jobs=-1, penalty='l1',
random_state=42, solver='saga'),
max_features=1406, threshold=-inf)_211"	11.403	0	0	1	0
47	100_SelectFromModel(estimator=LogisticRegression(max_iter=10000, multi_class='ovr',
n_jobs=-1, penalty='l1',
random_state=42, solver='saga'),
max_features=1406, threshold=-inf)_1406"	1_SelectFromModel(estimator=LogisticRegression(max_iter=10000, multi_class='ovr',
n_jobs=-1, penalty='l1',
random_state=42, solver='saga'),
max_features=1406, threshold=-inf)_527"	16.316	0	0	1	0
48	100_SelectFromModel(estimator=LogisticRegression(max_iter=10000, multi_class='ovr',
n_jobs=-1, penalty='l1',
random_state=42, solver='saga'),
max_features=1406, threshold=-inf)_1406"	1_SelectFromModel(estimator=LogisticRegression(max_iter=10000, multi_class='ovr',
n_jobs=-1, penalty='l1',
random_state=42, solver='saga'),
max_features=1406, threshold=-inf)_422"	14.98	0	0	1	0
49	100_SelectFromModel(estimator=LogisticRegression(max_iter=10000, multi_class='ovr',
n_jobs=-1, penalty='l1',
random_state=42, solver='saga'),
max_features=1406, threshold=-inf)_1406"	100_SelectFromModel(estimator=LogisticRegression(max_iter=10000, multi_class='ovr',
n_jobs=-1, penalty='l1',
random_state=42, solver='saga'),
max_features=1406, threshold=-inf)_211"	17.975	0	0	1	0
50	100_SelectFromModel(estimator=LogisticRegression(max_iter=10000, multi_class='ovr',
n_jobs=-1, penalty='l1',
random_state=42, solver='saga'),
max_features=1406, threshold=-inf)_1406"	200_SelectFromModel(estimator=LogisticRegression(max_iter=10000, multi_class='ovr',
n_jobs=-1, penalty='l1',
random_state=42, solver='saga'),
max_features=1406, threshold=-inf)_211"	20.829	0	0	1	0
51	100_SelectFromModel(estimator=LogisticRegression(max_iter=10000, multi_class='ovr',
n_jobs=-1, penalty='l1',
random_state=42, solver='saga'),
max_features=1406, threshold=-inf)_1406"	1_SelectFromModel(estimator=LogisticRegression(max_iter=10000, multi_class='ovr',
n_jobs=-1, penalty='l1',
random_state=42, solver='saga'),
max_features=1406, threshold=-inf)_1054"	18.688	0	0	1	0
52	100_SelectFromModel(estimator=LogisticRegression(max_iter=10000, multi_class='ovr',
n_jobs=-1, penalty='l1',
random_state=42, solver='saga'),
max_features=1406, threshold=-inf)_1406"	1_SelectFromModel(estimator=LogisticRegression(max_iter=10000, multi_class='ovr',
n_jobs=-1, penalty='l1',
random_state=42, solver='saga'),
max_features=1406, threshold=-inf)_211"	19.022	0	0	1	0
53	100_SelectFromModel(estimator=LogisticRegression(max_iter=10000, multi_class='ovr',
n_jobs=-1, penalty='l1',
random_state=42, solver='saga'),
max_features=1406, threshold=-inf)_1406"	1_SelectFromModel(estimator=LogisticRegression(max_iter=10000, multi_class='ovr',
n_jobs=-1, penalty='l1',
random_state=42, solver='saga'),
max_features=1406, threshold=-inf)_1406"	14.754	0	0	1	0
54	200_SelectFromModel(estimator=LogisticRegression(max_iter=10000, multi_class='ovr',
n_jobs=-1, penalty='l1',
random_state=42, solver='saga'),
max_features=1406, threshold=-inf)_1406"	10_SelectFromModel(estimator=LogisticRegression(max_iter=10000, multi_class='ovr',
n_jobs=-1, penalty='l1',
random_state=42, solver='saga'),
max_features=1406, threshold=-inf)_527"	0.68	1	0.017	0.146	0.837
55	200_SelectFromModel(estimator=LogisticRegression(max_iter=10000, multi_class='ovr',
n_jobs=-1, penalty='l1',
random_state=42, solver='saga'),
max_features=1406, threshold=-inf)_1406"	100_SelectFromModel(estimator=LogisticRegression(max_iter=10000, multi_class='ovr',
n_jobs=-1, penalty='l1',
random_state=42, solver='saga'),
max_features=1406, threshold=-inf)_1054"	3.577	0.566	0	0.689	0.311
56	200_SelectFromModel(estimator=LogisticRegression(max_iter=10000, multi_class='ovr',
n_jobs=-1, penalty='l1',
random_state=42, solver='saga'),
max_features=1406, threshold=-inf)_1406"	200_SelectFromModel(estimator=LogisticRegression(max_iter=10000, multi_class='ovr',
n_jobs=-1, penalty='l1',
random_state=42, solver='saga'),
max_features=1406, threshold=-inf)_1054"	3.577	0.566	0	0.724	0.276
57	200_SelectFromModel(estimator=LogisticRegression(max_iter=10000, multi_class='ovr',
n_jobs=-1, penalty='l1',
random_state=42, solver='saga'),
max_features=1406, threshold=-inf)_1406"	10_SelectFromModel(estimator=LogisticRegression(max_iter=10000, multi_class='ovr',
n_jobs=-1, penalty='l1',
random_state=42, solver='saga'),
max_features=1406, threshold=-inf)_422"	3.216	1	0.001	0.939	0.061
58	200_SelectFromModel(estimator=LogisticRegression(max_iter=10000, multi_class='ovr',
n_jobs=-1, penalty='l1',
random_state=42, solver='saga'),
max_features=1406, threshold=-inf)_1406"	100_SelectFromModel(estimator=LogisticRegression(max_iter=10000, multi_class='ovr',
n_jobs=-1, penalty='l1',
random_state=42, solver='saga'),
max_features=1406, threshold=-inf)_527"	3.745	0.436	0	0.966	0.034
59	200_SelectFromModel(estimator=LogisticRegression(max_iter=10000, multi_class='ovr',
n_jobs=-1, penalty='l1',
random_state=42, solver='saga'),
max_features=1406, threshold=-inf)_1406"	200_SelectFromModel(estimator=LogisticRegression(max_iter=10000, multi_class='ovr',
n_jobs=-1, penalty='l1',
random_state=42, solver='saga'),
max_features=1406, threshold=-inf)_527"	3.786	0.409	0	0.971	0.029
60	200_SelectFromModel(estimator=LogisticRegression(max_iter=10000, multi_class='ovr',
n_jobs=-1, penalty='l1',
random_state=42, solver='saga'),
max_features=1406, threshold=-inf)_1406"	100_SelectFromModel(estimator=LogisticRegression(max_iter=10000, multi_class='ovr',
n_jobs=-1, penalty='l1',
random_state=42, solver='saga'),
max_features=1406, threshold=-inf)_422"	4.479	0.146	0	0.994	0.006
61	200_SelectFromModel(estimator=LogisticRegression(max_iter=10000, multi_class='ovr',
n_jobs=-1, penalty='l1',
random_state=42, solver='saga'),
max_features=1406, threshold=-inf)_1406"	200_SelectFromModel(estimator=LogisticRegression(max_iter=10000, multi_class='ovr',
n_jobs=-1, penalty='l1',
random_state=42, solver='saga'),
max_features=1406, threshold=-inf)_422"	4.983	0.072	0	0.997	0.003
62	200_SelectFromModel(estimator=LogisticRegression(max_iter=10000, multi_class='ovr',
n_jobs=-1, penalty='l1',
random_state=42, solver='saga'),
max_features=1406, threshold=-inf)_1406"	10_SelectFromModel(estimator=LogisticRegression(max_iter=10000, multi_class='ovr',
n_jobs=-1, penalty='l1',
random_state=42, solver='saga'),
max_features=1406, threshold=-inf)_211"	11.403	0	0	1	0
63	200_SelectFromModel(estimator=LogisticRegression(max_iter=10000, multi_class='ovr',
n_jobs=-1, penalty='l1',
random_state=42, solver='saga'),
max_features=1406, threshold=-inf)_1406"	1_SelectFromModel(estimator=LogisticRegression(max_iter=10000, multi_class='ovr',
n_jobs=-1, penalty='l1',
random_state=42, solver='saga'),
max_features=1406, threshold=-inf)_527"	16.316	0	0	1	0
64	200_SelectFromModel(estimator=LogisticRegression(max_iter=10000, multi_class='ovr',
n_jobs=-1, penalty='l1',
random_state=42, solver='saga'),
max_features=1406, threshold=-inf)_1406"	1_SelectFromModel(estimator=LogisticRegression(max_iter=10000, multi_class='ovr',
n_jobs=-1, penalty='l1',
random_state=42, solver='saga'),
max_features=1406, threshold=-inf)_422"	14.98	0	0	1	0
65	200_SelectFromModel(estimator=LogisticRegression(max_iter=10000, multi_class='ovr',
n_jobs=-1, penalty='l1',
random_state=42, solver='saga'),
max_features=1406, threshold=-inf)_1406"	100_SelectFromModel(estimator=LogisticRegression(max_iter=10000, multi_class='ovr',
n_jobs=-1, penalty='l1',
random_state=42, solver='saga'),
max_features=1406, threshold=-inf)_211"	17.975	0	0	1	0
66	200_SelectFromModel(estimator=LogisticRegression(max_iter=10000, multi_class='ovr',
n_jobs=-1, penalty='l1',
random_state=42, solver='saga'),
max_features=1406, threshold=-inf)_1406"	200_SelectFromModel(estimator=LogisticRegression(max_iter=10000, multi_class='ovr',
n_jobs=-1, penalty='l1',
random_state=42, solver='saga'),
max_features=1406, threshold=-inf)_211"	20.829	0	0	1	0
67	200_SelectFromModel(estimator=LogisticRegression(max_iter=10000, multi_class='ovr',
n_jobs=-1, penalty='l1',
random_state=42, solver='saga'),
max_features=1406, threshold=-inf)_1406"	1_SelectFromModel(estimator=LogisticRegression(max_iter=10000, multi_class='ovr',
n_jobs=-1, penalty='l1',
random_state=42, solver='saga'),
max_features=1406, threshold=-inf)_1054"	18.688	0	0	1	0
68	200_SelectFromModel(estimator=LogisticRegression(max_iter=10000, multi_class='ovr',
n_jobs=-1, penalty='l1',
random_state=42, solver='saga'),
max_features=1406, threshold=-inf)_1406"	1_SelectFromModel(estimator=LogisticRegression(max_iter=10000, multi_class='ovr',
n_jobs=-1, penalty='l1',
random_state=42, solver='saga'),
max_features=1406, threshold=-inf)_211"	19.022	0	0	1	0
69	200_SelectFromModel(estimator=LogisticRegression(max_iter=10000, multi_class='ovr',
n_jobs=-1, penalty='l1',
random_state=42, solver='saga'),
max_features=1406, threshold=-inf)_1406"	1_SelectFromModel(estimator=LogisticRegression(max_iter=10000, multi_class='ovr',
n_jobs=-1, penalty='l1',
random_state=42, solver='saga'),
max_features=1406, threshold=-inf)_1406"	14.754	0	0	1	0
70	10_SelectFromModel(estimator=LogisticRegression(max_iter=10000, multi_class='ovr',
n_jobs=-1, penalty='l1',
random_state=42, solver='saga'),
max_features=1406, threshold=-inf)_527"	100_SelectFromModel(estimator=LogisticRegression(max_iter=10000, multi_class='ovr',
n_jobs=-1, penalty='l1',
random_state=42, solver='saga'),
max_features=1406, threshold=-inf)_1054"	1.518	1	0.004	0.347	0.649
71	10_SelectFromModel(estimator=LogisticRegression(max_iter=10000, multi_class='ovr',
n_jobs=-1, penalty='l1',
random_state=42, solver='saga'),
max_features=1406, threshold=-inf)_527"	200_SelectFromModel(estimator=LogisticRegression(max_iter=10000, multi_class='ovr',
n_jobs=-1, penalty='l1',
random_state=42, solver='saga'),
max_features=1406, threshold=-inf)_1054"	1.588	1	0.003	0.377	0.62
72	10_SelectFromModel(estimator=LogisticRegression(max_iter=10000, multi_class='ovr',
n_jobs=-1, penalty='l1',
random_state=42, solver='saga'),
max_features=1406, threshold=-inf)_527"	10_SelectFromModel(estimator=LogisticRegression(max_iter=10000, multi_class='ovr',
n_jobs=-1, penalty='l1',
random_state=42, solver='saga'),
max_features=1406, threshold=-inf)_422"	3.638	0.514	0	0.924	0.076
73	10_SelectFromModel(estimator=LogisticRegression(max_iter=10000, multi_class='ovr',
n_jobs=-1, penalty='l1',
random_state=42, solver='saga'),
max_features=1406, threshold=-inf)_527"	100_SelectFromModel(estimator=LogisticRegression(max_iter=10000, multi_class='ovr',
n_jobs=-1, penalty='l1',
random_state=42, solver='saga'),
max_features=1406, threshold=-inf)_527"	5.722	0.027	0	0.987	0.013
74	10_SelectFromModel(estimator=LogisticRegression(max_iter=10000, multi_class='ovr',
n_jobs=-1, penalty='l1',
random_state=42, solver='saga'),
max_features=1406, threshold=-inf)_527"	200_SelectFromModel(estimator=LogisticRegression(max_iter=10000, multi_class='ovr',
n_jobs=-1, penalty='l1',
random_state=42, solver='saga'),
max_features=1406, threshold=-inf)_527"	5.796	0.025	0	0.99	0.01
75	10_SelectFromModel(estimator=LogisticRegression(max_iter=10000, multi_class='ovr',
n_jobs=-1, penalty='l1',
random_state=42, solver='saga'),
max_features=1406, threshold=-inf)_527"	100_SelectFromModel(estimator=LogisticRegression(max_iter=10000, multi_class='ovr',
n_jobs=-1, penalty='l1',
random_state=42, solver='saga'),
max_features=1406, threshold=-inf)_422"	4.192	0.222	0	0.989	0.01
76	10_SelectFromModel(estimator=LogisticRegression(max_iter=10000, multi_class='ovr',
n_jobs=-1, penalty='l1',
random_state=42, solver='saga'),
max_features=1406, threshold=-inf)_527"	200_SelectFromModel(estimator=LogisticRegression(max_iter=10000, multi_class='ovr',
n_jobs=-1, penalty='l1',
random_state=42, solver='saga'),
max_features=1406, threshold=-inf)_422"	4.672	0.111	0	0.995	0.005
77	10_SelectFromModel(estimator=LogisticRegression(max_iter=10000, multi_class='ovr',
n_jobs=-1, penalty='l1',
random_state=42, solver='saga'),
max_features=1406, threshold=-inf)_527"	10_SelectFromModel(estimator=LogisticRegression(max_iter=10000, multi_class='ovr',
n_jobs=-1, penalty='l1',
random_state=42, solver='saga'),
max_features=1406, threshold=-inf)_211"	12.963	0	0	1	0
78	10_SelectFromModel(estimator=LogisticRegression(max_iter=10000, multi_class='ovr',
n_jobs=-1, penalty='l1',
random_state=42, solver='saga'),
max_features=1406, threshold=-inf)_527"	1_SelectFromModel(estimator=LogisticRegression(max_iter=10000, multi_class='ovr',
n_jobs=-1, penalty='l1',
random_state=42, solver='saga'),
max_features=1406, threshold=-inf)_527"	12.225	0	0	1	0
79	10_SelectFromModel(estimator=LogisticRegression(max_iter=10000, multi_class='ovr',
n_jobs=-1, penalty='l1',
random_state=42, solver='saga'),
max_features=1406, threshold=-inf)_527"	1_SelectFromModel(estimator=LogisticRegression(max_iter=10000, multi_class='ovr',
n_jobs=-1, penalty='l1',
random_state=42, solver='saga'),
max_features=1406, threshold=-inf)_422"	12.859	0	0	1	0
80	10_SelectFromModel(estimator=LogisticRegression(max_iter=10000, multi_class='ovr',
n_jobs=-1, penalty='l1',
random_state=42, solver='saga'),
max_features=1406, threshold=-inf)_527"	100_SelectFromModel(estimator=LogisticRegression(max_iter=10000, multi_class='ovr',
n_jobs=-1, penalty='l1',
random_state=42, solver='saga'),
max_features=1406, threshold=-inf)_211"	15.082	0	0	1	0
81	10_SelectFromModel(estimator=LogisticRegression(max_iter=10000, multi_class='ovr',
n_jobs=-1, penalty='l1',
random_state=42, solver='saga'),
max_features=1406, threshold=-inf)_527"	200_SelectFromModel(estimator=LogisticRegression(max_iter=10000, multi_class='ovr',
n_jobs=-1, penalty='l1',
random_state=42, solver='saga'),
max_features=1406, threshold=-inf)_211"	17.488	0	0	1	0
82	10_SelectFromModel(estimator=LogisticRegression(max_iter=10000, multi_class='ovr',
n_jobs=-1, penalty='l1',
random_state=42, solver='saga'),
max_features=1406, threshold=-inf)_527"	1_SelectFromModel(estimator=LogisticRegression(max_iter=10000, multi_class='ovr',
n_jobs=-1, penalty='l1',
random_state=42, solver='saga'),
max_features=1406, threshold=-inf)_1054"	13.57	0	0	1	0
83	10_SelectFromModel(estimator=LogisticRegression(max_iter=10000, multi_class='ovr',
n_jobs=-1, penalty='l1',
random_state=42, solver='saga'),
max_features=1406, threshold=-inf)_527"	1_SelectFromModel(estimator=LogisticRegression(max_iter=10000, multi_class='ovr',
n_jobs=-1, penalty='l1',
random_state=42, solver='saga'),
max_features=1406, threshold=-inf)_211"	22.731	0	0	1	0
84	10_SelectFromModel(estimator=LogisticRegression(max_iter=10000, multi_class='ovr',
n_jobs=-1, penalty='l1',
random_state=42, solver='saga'),
max_features=1406, threshold=-inf)_527"	1_SelectFromModel(estimator=LogisticRegression(max_iter=10000, multi_class='ovr',
n_jobs=-1, penalty='l1',
random_state=42, solver='saga'),
max_features=1406, threshold=-inf)_1406"	11.004	0	0	1	0
85	100_SelectFromModel(estimator=LogisticRegression(max_iter=10000, multi_class='ovr',
n_jobs=-1, penalty='l1',
random_state=42, solver='saga'),
max_features=1406, threshold=-inf)_1054"	200_SelectFromModel(estimator=LogisticRegression(max_iter=10000, multi_class='ovr',
n_jobs=-1, penalty='l1',
random_state=42, solver='saga'),
max_features=1406, threshold=-inf)_1054"	1.794	1	0	0	1
86	100_SelectFromModel(estimator=LogisticRegression(max_iter=10000, multi_class='ovr',
n_jobs=-1, penalty='l1',
random_state=42, solver='saga'),
max_features=1406, threshold=-inf)_1054"	10_SelectFromModel(estimator=LogisticRegression(max_iter=10000, multi_class='ovr',
n_jobs=-1, penalty='l1',
random_state=42, solver='saga'),
max_features=1406, threshold=-inf)_422"	1.531	1	0.006	0.477	0.517
87	100_SelectFromModel(estimator=LogisticRegression(max_iter=10000, multi_class='ovr',
n_jobs=-1, penalty='l1',
random_state=42, solver='saga'),
max_features=1406, threshold=-inf)_1054"	100_SelectFromModel(estimator=LogisticRegression(max_iter=10000, multi_class='ovr',
n_jobs=-1, penalty='l1',
random_state=42, solver='saga'),
max_features=1406, threshold=-inf)_527"	2.129	1	0.001	0.558	0.441
88	100_SelectFromModel(estimator=LogisticRegression(max_iter=10000, multi_class='ovr',
n_jobs=-1, penalty='l1',
random_state=42, solver='saga'),
max_features=1406, threshold=-inf)_1054"	200_SelectFromModel(estimator=LogisticRegression(max_iter=10000, multi_class='ovr',
n_jobs=-1, penalty='l1',
random_state=42, solver='saga'),
max_features=1406, threshold=-inf)_527"	2.304	1	0.001	0.625	0.374
89	100_SelectFromModel(estimator=LogisticRegression(max_iter=10000, multi_class='ovr',
n_jobs=-1, penalty='l1',
random_state=42, solver='saga'),
max_features=1406, threshold=-inf)_1054"	100_SelectFromModel(estimator=LogisticRegression(max_iter=10000, multi_class='ovr',
n_jobs=-1, penalty='l1',
random_state=42, solver='saga'),
max_features=1406, threshold=-inf)_422"	2.813	1	0.001	0.919	0.079
90	100_SelectFromModel(estimator=LogisticRegression(max_iter=10000, multi_class='ovr',
n_jobs=-1, penalty='l1',
random_state=42, solver='saga'),
max_features=1406, threshold=-inf)_1054"	200_SelectFromModel(estimator=LogisticRegression(max_iter=10000, multi_class='ovr',
n_jobs=-1, penalty='l1',
random_state=42, solver='saga'),
max_features=1406, threshold=-inf)_422"	3.248	0.953	0.001	0.957	0.042
91	100_SelectFromModel(estimator=LogisticRegression(max_iter=10000, multi_class='ovr',
n_jobs=-1, penalty='l1',
random_state=42, solver='saga'),
max_features=1406, threshold=-inf)_1054"	10_SelectFromModel(estimator=LogisticRegression(max_iter=10000, multi_class='ovr',
n_jobs=-1, penalty='l1',
random_state=42, solver='saga'),
max_features=1406, threshold=-inf)_211"	8.657	0.001	0	1	0
92	100_SelectFromModel(estimator=LogisticRegression(max_iter=10000, multi_class='ovr',
n_jobs=-1, penalty='l1',
random_state=42, solver='saga'),
max_features=1406, threshold=-inf)_1054"	1_SelectFromModel(estimator=LogisticRegression(max_iter=10000, multi_class='ovr',
n_jobs=-1, penalty='l1',
random_state=42, solver='saga'),
max_features=1406, threshold=-inf)_527"	12.977	0	0	1	0
93	100_SelectFromModel(estimator=LogisticRegression(max_iter=10000, multi_class='ovr',
n_jobs=-1, penalty='l1',
random_state=42, solver='saga'),
max_features=1406, threshold=-inf)_1054"	1_SelectFromModel(estimator=LogisticRegression(max_iter=10000, multi_class='ovr',
n_jobs=-1, penalty='l1',
random_state=42, solver='saga'),
max_features=1406, threshold=-inf)_422"	11.398	0	0	1	0
94	100_SelectFromModel(estimator=LogisticRegression(max_iter=10000, multi_class='ovr',
n_jobs=-1, penalty='l1',
random_state=42, solver='saga'),
max_features=1406, threshold=-inf)_1054"	100_SelectFromModel(estimator=LogisticRegression(max_iter=10000, multi_class='ovr',
n_jobs=-1, penalty='l1',
random_state=42, solver='saga'),
max_features=1406, threshold=-inf)_211"	14.219	0	0	1	0
95	100_SelectFromModel(estimator=LogisticRegression(max_iter=10000, multi_class='ovr',
n_jobs=-1, penalty='l1',
random_state=42, solver='saga'),
max_features=1406, threshold=-inf)_1054"	200_SelectFromModel(estimator=LogisticRegression(max_iter=10000, multi_class='ovr',
n_jobs=-1, penalty='l1',
random_state=42, solver='saga'),
max_features=1406, threshold=-inf)_211"	15.17	0	0	1	0
96	100_SelectFromModel(estimator=LogisticRegression(max_iter=10000, multi_class='ovr',
n_jobs=-1, penalty='l1',
random_state=42, solver='saga'),
max_features=1406, threshold=-inf)_1054"	1_SelectFromModel(estimator=LogisticRegression(max_iter=10000, multi_class='ovr',
n_jobs=-1, penalty='l1',
random_state=42, solver='saga'),
max_features=1406, threshold=-inf)_1054"	15.962	0	0	1	0
97	100_SelectFromModel(estimator=LogisticRegression(max_iter=10000, multi_class='ovr',
n_jobs=-1, penalty='l1',
random_state=42, solver='saga'),
max_features=1406, threshold=-inf)_1054"	1_SelectFromModel(estimator=LogisticRegression(max_iter=10000, multi_class='ovr',
n_jobs=-1, penalty='l1',
random_state=42, solver='saga'),
max_features=1406, threshold=-inf)_211"	17.229	0	0	1	0
98	100_SelectFromModel(estimator=LogisticRegression(max_iter=10000, multi_class='ovr',
n_jobs=-1, penalty='l1',
random_state=42, solver='saga'),
max_features=1406, threshold=-inf)_1054"	1_SelectFromModel(estimator=LogisticRegression(max_iter=10000, multi_class='ovr',
n_jobs=-1, penalty='l1',
random_state=42, solver='saga'),
max_features=1406, threshold=-inf)_1406"	12.649	0	0	1	0
99	200_SelectFromModel(estimator=LogisticRegression(max_iter=10000, multi_class='ovr',
n_jobs=-1, penalty='l1',
random_state=42, solver='saga'),
max_features=1406, threshold=-inf)_1054"	10_SelectFromModel(estimator=LogisticRegression(max_iter=10000, multi_class='ovr',
n_jobs=-1, penalty='l1',
random_state=42, solver='saga'),
max_features=1406, threshold=-inf)_422"	1.455	1	0.007	0.452	0.541
100	200_SelectFromModel(estimator=LogisticRegression(max_iter=10000, multi_class='ovr',
n_jobs=-1, penalty='l1',
random_state=42, solver='saga'),
max_features=1406, threshold=-inf)_1054"	100_SelectFromModel(estimator=LogisticRegression(max_iter=10000, multi_class='ovr',
n_jobs=-1, penalty='l1',
random_state=42, solver='saga'),
max_features=1406, threshold=-inf)_527"	2.035	1	0.002	0.526	0.473
101	200_SelectFromModel(estimator=LogisticRegression(max_iter=10000, multi_class='ovr',
n_jobs=-1, penalty='l1',
random_state=42, solver='saga'),
max_features=1406, threshold=-inf)_1054"	200_SelectFromModel(estimator=LogisticRegression(max_iter=10000, multi_class='ovr',
n_jobs=-1, penalty='l1',
random_state=42, solver='saga'),
max_features=1406, threshold=-inf)_527"	2.219	1	0.001	0.594	0.405
102	200_SelectFromModel(estimator=LogisticRegression(max_iter=10000, multi_class='ovr',
n_jobs=-1, penalty='l1',
random_state=42, solver='saga'),
max_features=1406, threshold=-inf)_1054"	100_SelectFromModel(estimator=LogisticRegression(max_iter=10000, multi_class='ovr',
n_jobs=-1, penalty='l1',
random_state=42, solver='saga'),
max_features=1406, threshold=-inf)_422"	2.739	1	0.002	0.911	0.088
103	200_SelectFromModel(estimator=LogisticRegression(max_iter=10000, multi_class='ovr',
n_jobs=-1, penalty='l1',
random_state=42, solver='saga'),
max_features=1406, threshold=-inf)_1054"	200_SelectFromModel(estimator=LogisticRegression(max_iter=10000, multi_class='ovr',
n_jobs=-1, penalty='l1',
random_state=42, solver='saga'),
max_features=1406, threshold=-inf)_422"	3.168	1	0.001	0.952	0.047
104	200_SelectFromModel(estimator=LogisticRegression(max_iter=10000, multi_class='ovr',
n_jobs=-1, penalty='l1',
random_state=42, solver='saga'),
max_features=1406, threshold=-inf)_1054"	10_SelectFromModel(estimator=LogisticRegression(max_iter=10000, multi_class='ovr',
n_jobs=-1, penalty='l1',
random_state=42, solver='saga'),
max_features=1406, threshold=-inf)_211"	8.643	0.001	0	1	0
105	200_SelectFromModel(estimator=LogisticRegression(max_iter=10000, multi_class='ovr',
n_jobs=-1, penalty='l1',
random_state=42, solver='saga'),
max_features=1406, threshold=-inf)_1054"	1_SelectFromModel(estimator=LogisticRegression(max_iter=10000, multi_class='ovr',
n_jobs=-1, penalty='l1',
random_state=42, solver='saga'),
max_features=1406, threshold=-inf)_527"	13.041	0	0	1	0
106	200_SelectFromModel(estimator=LogisticRegression(max_iter=10000, multi_class='ovr',
n_jobs=-1, penalty='l1',
random_state=42, solver='saga'),
max_features=1406, threshold=-inf)_1054"	1_SelectFromModel(estimator=LogisticRegression(max_iter=10000, multi_class='ovr',
n_jobs=-1, penalty='l1',
random_state=42, solver='saga'),
max_features=1406, threshold=-inf)_422"	11.434	0	0	1	0
107	200_SelectFromModel(estimator=LogisticRegression(max_iter=10000, multi_class='ovr',
n_jobs=-1, penalty='l1',
random_state=42, solver='saga'),
max_features=1406, threshold=-inf)_1054"	100_SelectFromModel(estimator=LogisticRegression(max_iter=10000, multi_class='ovr',
n_jobs=-1, penalty='l1',
random_state=42, solver='saga'),
max_features=1406, threshold=-inf)_211"	14.238	0	0	1	0
108	200_SelectFromModel(estimator=LogisticRegression(max_iter=10000, multi_class='ovr',
n_jobs=-1, penalty='l1',
random_state=42, solver='saga'),
max_features=1406, threshold=-inf)_1054"	200_SelectFromModel(estimator=LogisticRegression(max_iter=10000, multi_class='ovr',
n_jobs=-1, penalty='l1',
random_state=42, solver='saga'),
max_features=1406, threshold=-inf)_211"	15.153	0	0	1	0
109	200_SelectFromModel(estimator=LogisticRegression(max_iter=10000, multi_class='ovr',
n_jobs=-1, penalty='l1',
random_state=42, solver='saga'),
max_features=1406, threshold=-inf)_1054"	1_SelectFromModel(estimator=LogisticRegression(max_iter=10000, multi_class='ovr',
n_jobs=-1, penalty='l1',
random_state=42, solver='saga'),
max_features=1406, threshold=-inf)_1054"	15.992	0	0	1	0
110	200_SelectFromModel(estimator=LogisticRegression(max_iter=10000, multi_class='ovr',
n_jobs=-1, penalty='l1',
random_state=42, solver='saga'),
max_features=1406, threshold=-inf)_1054"	1_SelectFromModel(estimator=LogisticRegression(max_iter=10000, multi_class='ovr',
n_jobs=-1, penalty='l1',
random_state=42, solver='saga'),
max_features=1406, threshold=-inf)_211"	17.364	0	0	1	0
111	200_SelectFromModel(estimator=LogisticRegression(max_iter=10000, multi_class='ovr',
n_jobs=-1, penalty='l1',
random_state=42, solver='saga'),
max_features=1406, threshold=-inf)_1054"	1_SelectFromModel(estimator=LogisticRegression(max_iter=10000, multi_class='ovr',
n_jobs=-1, penalty='l1',
random_state=42, solver='saga'),
max_features=1406, threshold=-inf)_1406"	12.65	0	0	1	0
112	10_SelectFromModel(estimator=LogisticRegression(max_iter=10000, multi_class='ovr',
n_jobs=-1, penalty='l1',
random_state=42, solver='saga'),
max_features=1406, threshold=-inf)_422"	100_SelectFromModel(estimator=LogisticRegression(max_iter=10000, multi_class='ovr',
n_jobs=-1, penalty='l1',
random_state=42, solver='saga'),
max_features=1406, threshold=-inf)_527"	0.276	1	0.012	0.029	0.96
113	10_SelectFromModel(estimator=LogisticRegression(max_iter=10000, multi_class='ovr',
n_jobs=-1, penalty='l1',
random_state=42, solver='saga'),
max_features=1406, threshold=-inf)_422"	200_SelectFromModel(estimator=LogisticRegression(max_iter=10000, multi_class='ovr',
n_jobs=-1, penalty='l1',
random_state=42, solver='saga'),
max_features=1406, threshold=-inf)_527"	0.446	1	0.013	0.057	0.93
114	10_SelectFromModel(estimator=LogisticRegression(max_iter=10000, multi_class='ovr',
n_jobs=-1, penalty='l1',
random_state=42, solver='saga'),
max_features=1406, threshold=-inf)_422"	100_SelectFromModel(estimator=LogisticRegression(max_iter=10000, multi_class='ovr',
n_jobs=-1, penalty='l1',
random_state=42, solver='saga'),
max_features=1406, threshold=-inf)_422"	2.565	1	0.001	0.674	0.326
115	10_SelectFromModel(estimator=LogisticRegression(max_iter=10000, multi_class='ovr',
n_jobs=-1, penalty='l1',
random_state=42, solver='saga'),
max_features=1406, threshold=-inf)_422"	200_SelectFromModel(estimator=LogisticRegression(max_iter=10000, multi_class='ovr',
n_jobs=-1, penalty='l1',
random_state=42, solver='saga'),
max_features=1406, threshold=-inf)_422"	3.142	1	0	0.841	0.159
116	10_SelectFromModel(estimator=LogisticRegression(max_iter=10000, multi_class='ovr',
n_jobs=-1, penalty='l1',
random_state=42, solver='saga'),
max_features=1406, threshold=-inf)_422"	10_SelectFromModel(estimator=LogisticRegression(max_iter=10000, multi_class='ovr',
n_jobs=-1, penalty='l1',
random_state=42, solver='saga'),
max_features=1406, threshold=-inf)_211"	8.264	0.002	0	1	0
117	10_SelectFromModel(estimator=LogisticRegression(max_iter=10000, multi_class='ovr',
n_jobs=-1, penalty='l1',
random_state=42, solver='saga'),
max_features=1406, threshold=-inf)_422"	1_SelectFromModel(estimator=LogisticRegression(max_iter=10000, multi_class='ovr',
n_jobs=-1, penalty='l1',
random_state=42, solver='saga'),
max_features=1406, threshold=-inf)_527"	9.354	0.001	0	1	0
118	10_SelectFromModel(estimator=LogisticRegression(max_iter=10000, multi_class='ovr',
n_jobs=-1, penalty='l1',
random_state=42, solver='saga'),
max_features=1406, threshold=-inf)_422"	1_SelectFromModel(estimator=LogisticRegression(max_iter=10000, multi_class='ovr',
n_jobs=-1, penalty='l1',
random_state=42, solver='saga'),
max_features=1406, threshold=-inf)_422"	10.814	0	0	1	0
119	10_SelectFromModel(estimator=LogisticRegression(max_iter=10000, multi_class='ovr',
n_jobs=-1, penalty='l1',
random_state=42, solver='saga'),
max_features=1406, threshold=-inf)_422"	100_SelectFromModel(estimator=LogisticRegression(max_iter=10000, multi_class='ovr',
n_jobs=-1, penalty='l1',
random_state=42, solver='saga'),
max_features=1406, threshold=-inf)_211"	11.825	0	0	1	0
120	10_SelectFromModel(estimator=LogisticRegression(max_iter=10000, multi_class='ovr',
n_jobs=-1, penalty='l1',
random_state=42, solver='saga'),
max_features=1406, threshold=-inf)_422"	200_SelectFromModel(estimator=LogisticRegression(max_iter=10000, multi_class='ovr',
n_jobs=-1, penalty='l1',
random_state=42, solver='saga'),
max_features=1406, threshold=-inf)_211"	13.428	0	0	1	0
121	10_SelectFromModel(estimator=LogisticRegression(max_iter=10000, multi_class='ovr',
n_jobs=-1, penalty='l1',
random_state=42, solver='saga'),
max_features=1406, threshold=-inf)_422"	1_SelectFromModel(estimator=LogisticRegression(max_iter=10000, multi_class='ovr',
n_jobs=-1, penalty='l1',
random_state=42, solver='saga'),
max_features=1406, threshold=-inf)_1054"	11.056	0	0	1	0
122	10_SelectFromModel(estimator=LogisticRegression(max_iter=10000, multi_class='ovr',
n_jobs=-1, penalty='l1',
random_state=42, solver='saga'),
max_features=1406, threshold=-inf)_422"	1_SelectFromModel(estimator=LogisticRegression(max_iter=10000, multi_class='ovr',
n_jobs=-1, penalty='l1',
random_state=42, solver='saga'),
max_features=1406, threshold=-inf)_211"	19.507	0	0	1	0
123	10_SelectFromModel(estimator=LogisticRegression(max_iter=10000, multi_class='ovr',
n_jobs=-1, penalty='l1',
random_state=42, solver='saga'),
max_features=1406, threshold=-inf)_422"	1_SelectFromModel(estimator=LogisticRegression(max_iter=10000, multi_class='ovr',
n_jobs=-1, penalty='l1',
random_state=42, solver='saga'),
max_features=1406, threshold=-inf)_1406"	9.271	0.001	0	1	0
124	100_SelectFromModel(estimator=LogisticRegression(max_iter=10000, multi_class='ovr',
n_jobs=-1, penalty='l1',
random_state=42, solver='saga'),
max_features=1406, threshold=-inf)_527"	200_SelectFromModel(estimator=LogisticRegression(max_iter=10000, multi_class='ovr',
n_jobs=-1, penalty='l1',
random_state=42, solver='saga'),
max_features=1406, threshold=-inf)_527"	0.885	1	0	0	1
125	100_SelectFromModel(estimator=LogisticRegression(max_iter=10000, multi_class='ovr',
n_jobs=-1, penalty='l1',
random_state=42, solver='saga'),
max_features=1406, threshold=-inf)_527"	100_SelectFromModel(estimator=LogisticRegression(max_iter=10000, multi_class='ovr',
n_jobs=-1, penalty='l1',
random_state=42, solver='saga'),
max_features=1406, threshold=-inf)_422"	2.054	1	0.002	0.578	0.42
126	100_SelectFromModel(estimator=LogisticRegression(max_iter=10000, multi_class='ovr',
n_jobs=-1, penalty='l1',
random_state=42, solver='saga'),
max_features=1406, threshold=-inf)_527"	200_SelectFromModel(estimator=LogisticRegression(max_iter=10000, multi_class='ovr',
n_jobs=-1, penalty='l1',
random_state=42, solver='saga'),
max_features=1406, threshold=-inf)_422"	2.683	1	0.001	0.767	0.233
127	100_SelectFromModel(estimator=LogisticRegression(max_iter=10000, multi_class='ovr',
n_jobs=-1, penalty='l1',
random_state=42, solver='saga'),
max_features=1406, threshold=-inf)_527"	10_SelectFromModel(estimator=LogisticRegression(max_iter=10000, multi_class='ovr',
n_jobs=-1, penalty='l1',
random_state=42, solver='saga'),
max_features=1406, threshold=-inf)_211"	9.908	0	0	1	0
128	100_SelectFromModel(estimator=LogisticRegression(max_iter=10000, multi_class='ovr',
n_jobs=-1, penalty='l1',
random_state=42, solver='saga'),
max_features=1406, threshold=-inf)_527"	1_SelectFromModel(estimator=LogisticRegression(max_iter=10000, multi_class='ovr',
n_jobs=-1, penalty='l1',
random_state=42, solver='saga'),
max_features=1406, threshold=-inf)_527"	8.313	0.002	0	1	0
129	100_SelectFromModel(estimator=LogisticRegression(max_iter=10000, multi_class='ovr',
n_jobs=-1, penalty='l1',
random_state=42, solver='saga'),
max_features=1406, threshold=-inf)_527"	1_SelectFromModel(estimator=LogisticRegression(max_iter=10000, multi_class='ovr',
n_jobs=-1, penalty='l1',
random_state=42, solver='saga'),
max_features=1406, threshold=-inf)_422"	9.375	0.001	0	1	0
130	100_SelectFromModel(estimator=LogisticRegression(max_iter=10000, multi_class='ovr',
n_jobs=-1, penalty='l1',
random_state=42, solver='saga'),
max_features=1406, threshold=-inf)_527"	100_SelectFromModel(estimator=LogisticRegression(max_iter=10000, multi_class='ovr',
n_jobs=-1, penalty='l1',
random_state=42, solver='saga'),
max_features=1406, threshold=-inf)_211"	14.49	0	0	1	0
131	100_SelectFromModel(estimator=LogisticRegression(max_iter=10000, multi_class='ovr',
n_jobs=-1, penalty='l1',
random_state=42, solver='saga'),
max_features=1406, threshold=-inf)_527"	200_SelectFromModel(estimator=LogisticRegression(max_iter=10000, multi_class='ovr',
n_jobs=-1, penalty='l1',
random_state=42, solver='saga'),
max_features=1406, threshold=-inf)_211"	15.201	0	0	1	0
132	100_SelectFromModel(estimator=LogisticRegression(max_iter=10000, multi_class='ovr',
n_jobs=-1, penalty='l1',
random_state=42, solver='saga'),
max_features=1406, threshold=-inf)_527"	1_SelectFromModel(estimator=LogisticRegression(max_iter=10000, multi_class='ovr',
n_jobs=-1, penalty='l1',
random_state=42, solver='saga'),
max_features=1406, threshold=-inf)_1054"	11.37	0	0	1	0
133	100_SelectFromModel(estimator=LogisticRegression(max_iter=10000, multi_class='ovr',
n_jobs=-1, penalty='l1',
random_state=42, solver='saga'),
max_features=1406, threshold=-inf)_527"	1_SelectFromModel(estimator=LogisticRegression(max_iter=10000, multi_class='ovr',
n_jobs=-1, penalty='l1',
random_state=42, solver='saga'),
max_features=1406, threshold=-inf)_211"	18.468	0	0	1	0
134	100_SelectFromModel(estimator=LogisticRegression(max_iter=10000, multi_class='ovr',
n_jobs=-1, penalty='l1',
random_state=42, solver='saga'),
max_features=1406, threshold=-inf)_527"	1_SelectFromModel(estimator=LogisticRegression(max_iter=10000, multi_class='ovr',
n_jobs=-1, penalty='l1',
random_state=42, solver='saga'),
max_features=1406, threshold=-inf)_1406"	9.042	0.001	0	1	0
135	200_SelectFromModel(estimator=LogisticRegression(max_iter=10000, multi_class='ovr',
n_jobs=-1, penalty='l1',
random_state=42, solver='saga'),
max_features=1406, threshold=-inf)_527"	100_SelectFromModel(estimator=LogisticRegression(max_iter=10000, multi_class='ovr',
n_jobs=-1, penalty='l1',
random_state=42, solver='saga'),
max_features=1406, threshold=-inf)_422"	1.721	1	0.004	0.513	0.484
136	200_SelectFromModel(estimator=LogisticRegression(max_iter=10000, multi_class='ovr',
n_jobs=-1, penalty='l1',
random_state=42, solver='saga'),
max_features=1406, threshold=-inf)_527"	200_SelectFromModel(estimator=LogisticRegression(max_iter=10000, multi_class='ovr',
n_jobs=-1, penalty='l1',
random_state=42, solver='saga'),
max_features=1406, threshold=-inf)_422"	2.272	1	0.002	0.696	0.303
137	200_SelectFromModel(estimator=LogisticRegression(max_iter=10000, multi_class='ovr',
n_jobs=-1, penalty='l1',
random_state=42, solver='saga'),
max_features=1406, threshold=-inf)_527"	10_SelectFromModel(estimator=LogisticRegression(max_iter=10000, multi_class='ovr',
n_jobs=-1, penalty='l1',
random_state=42, solver='saga'),
max_features=1406, threshold=-inf)_211"	10.008	0	0	1	0
138	200_SelectFromModel(estimator=LogisticRegression(max_iter=10000, multi_class='ovr',
n_jobs=-1, penalty='l1',
random_state=42, solver='saga'),
max_features=1406, threshold=-inf)_527"	1_SelectFromModel(estimator=LogisticRegression(max_iter=10000, multi_class='ovr',
n_jobs=-1, penalty='l1',
random_state=42, solver='saga'),
max_features=1406, threshold=-inf)_527"	8.035	0.002	0	1	0
139	200_SelectFromModel(estimator=LogisticRegression(max_iter=10000, multi_class='ovr',
n_jobs=-1, penalty='l1',
random_state=42, solver='saga'),
max_features=1406, threshold=-inf)_527"	1_SelectFromModel(estimator=LogisticRegression(max_iter=10000, multi_class='ovr',
n_jobs=-1, penalty='l1',
random_state=42, solver='saga'),
max_features=1406, threshold=-inf)_422"	8.925	0.001	0	1	0
140	200_SelectFromModel(estimator=LogisticRegression(max_iter=10000, multi_class='ovr',
n_jobs=-1, penalty='l1',
random_state=42, solver='saga'),
max_features=1406, threshold=-inf)_527"	100_SelectFromModel(estimator=LogisticRegression(max_iter=10000, multi_class='ovr',
n_jobs=-1, penalty='l1',
random_state=42, solver='saga'),
max_features=1406, threshold=-inf)_211"	14.65	0	0	1	0
141	200_SelectFromModel(estimator=LogisticRegression(max_iter=10000, multi_class='ovr',
n_jobs=-1, penalty='l1',
random_state=42, solver='saga'),
max_features=1406, threshold=-inf)_527"	200_SelectFromModel(estimator=LogisticRegression(max_iter=10000, multi_class='ovr',
n_jobs=-1, penalty='l1',
random_state=42, solver='saga'),
max_features=1406, threshold=-inf)_211"	15.336	0	0	1	0
142	200_SelectFromModel(estimator=LogisticRegression(max_iter=10000, multi_class='ovr',
n_jobs=-1, penalty='l1',
random_state=42, solver='saga'),
max_features=1406, threshold=-inf)_527"	1_SelectFromModel(estimator=LogisticRegression(max_iter=10000, multi_class='ovr',
n_jobs=-1, penalty='l1',
random_state=42, solver='saga'),
max_features=1406, threshold=-inf)_1054"	11.257	0	0	1	0
143	200_SelectFromModel(estimator=LogisticRegression(max_iter=10000, multi_class='ovr',
n_jobs=-1, penalty='l1',
random_state=42, solver='saga'),
max_features=1406, threshold=-inf)_527"	1_SelectFromModel(estimator=LogisticRegression(max_iter=10000, multi_class='ovr',
n_jobs=-1, penalty='l1',
random_state=42, solver='saga'),
max_features=1406, threshold=-inf)_211"	18.722	0	0	1	0
144	200_SelectFromModel(estimator=LogisticRegression(max_iter=10000, multi_class='ovr',
n_jobs=-1, penalty='l1',
random_state=42, solver='saga'),
max_features=1406, threshold=-inf)_527"	1_SelectFromModel(estimator=LogisticRegression(max_iter=10000, multi_class='ovr',
n_jobs=-1, penalty='l1',
random_state=42, solver='saga'),
max_features=1406, threshold=-inf)_1406"	8.861	0.001	0	1	0
145	100_SelectFromModel(estimator=LogisticRegression(max_iter=10000, multi_class='ovr',
n_jobs=-1, penalty='l1',
random_state=42, solver='saga'),
max_features=1406, threshold=-inf)_422"	200_SelectFromModel(estimator=LogisticRegression(max_iter=10000, multi_class='ovr',
n_jobs=-1, penalty='l1',
random_state=42, solver='saga'),
max_features=1406, threshold=-inf)_422"	3.544	0.596	0	0	1
146	100_SelectFromModel(estimator=LogisticRegression(max_iter=10000, multi_class='ovr',
n_jobs=-1, penalty='l1',
random_state=42, solver='saga'),
max_features=1406, threshold=-inf)_422"	10_SelectFromModel(estimator=LogisticRegression(max_iter=10000, multi_class='ovr',
n_jobs=-1, penalty='l1',
random_state=42, solver='saga'),
max_features=1406, threshold=-inf)_211"	6.692	0.008	0	1	0
147	100_SelectFromModel(estimator=LogisticRegression(max_iter=10000, multi_class='ovr',
n_jobs=-1, penalty='l1',
random_state=42, solver='saga'),
max_features=1406, threshold=-inf)_422"	1_SelectFromModel(estimator=LogisticRegression(max_iter=10000, multi_class='ovr',
n_jobs=-1, penalty='l1',
random_state=42, solver='saga'),
max_features=1406, threshold=-inf)_527"	5.702	0.028	0	0.999	0.001
148	100_SelectFromModel(estimator=LogisticRegression(max_iter=10000, multi_class='ovr',
n_jobs=-1, penalty='l1',
random_state=42, solver='saga'),
max_features=1406, threshold=-inf)_422"	1_SelectFromModel(estimator=LogisticRegression(max_iter=10000, multi_class='ovr',
n_jobs=-1, penalty='l1',
random_state=42, solver='saga'),
max_features=1406, threshold=-inf)_422"	7.283	0.004	0	1	0
149	100_SelectFromModel(estimator=LogisticRegression(max_iter=10000, multi_class='ovr',
n_jobs=-1, penalty='l1',
random_state=42, solver='saga'),
max_features=1406, threshold=-inf)_422"	100_SelectFromModel(estimator=LogisticRegression(max_iter=10000, multi_class='ovr',
n_jobs=-1, penalty='l1',
random_state=42, solver='saga'),
max_features=1406, threshold=-inf)_211"	10.584	0	0	1	0
150	100_SelectFromModel(estimator=LogisticRegression(max_iter=10000, multi_class='ovr',
n_jobs=-1, penalty='l1',
random_state=42, solver='saga'),
max_features=1406, threshold=-inf)_422"	200_SelectFromModel(estimator=LogisticRegression(max_iter=10000, multi_class='ovr',
n_jobs=-1, penalty='l1',
random_state=42, solver='saga'),
max_features=1406, threshold=-inf)_211"	12.363	0	0	1	0
151	100_SelectFromModel(estimator=LogisticRegression(max_iter=10000, multi_class='ovr',
n_jobs=-1, penalty='l1',
random_state=42, solver='saga'),
max_features=1406, threshold=-inf)_422"	1_SelectFromModel(estimator=LogisticRegression(max_iter=10000, multi_class='ovr',
n_jobs=-1, penalty='l1',
random_state=42, solver='saga'),
max_features=1406, threshold=-inf)_1054"	8.402	0.001	0	1	0
152	100_SelectFromModel(estimator=LogisticRegression(max_iter=10000, multi_class='ovr',
n_jobs=-1, penalty='l1',
random_state=42, solver='saga'),
max_features=1406, threshold=-inf)_422"	1_SelectFromModel(estimator=LogisticRegression(max_iter=10000, multi_class='ovr',
n_jobs=-1, penalty='l1',
random_state=42, solver='saga'),
max_features=1406, threshold=-inf)_211"	14.068	0	0	1	0
153	100_SelectFromModel(estimator=LogisticRegression(max_iter=10000, multi_class='ovr',
n_jobs=-1, penalty='l1',
random_state=42, solver='saga'),
max_features=1406, threshold=-inf)_422"	1_SelectFromModel(estimator=LogisticRegression(max_iter=10000, multi_class='ovr',
n_jobs=-1, penalty='l1',
random_state=42, solver='saga'),
max_features=1406, threshold=-inf)_1406"	7.127	0.005	0	1	0
154	200_SelectFromModel(estimator=LogisticRegression(max_iter=10000, multi_class='ovr',
n_jobs=-1, penalty='l1',
random_state=42, solver='saga'),
max_features=1406, threshold=-inf)_422"	10_SelectFromModel(estimator=LogisticRegression(max_iter=10000, multi_class='ovr',
n_jobs=-1, penalty='l1',
random_state=42, solver='saga'),
max_features=1406, threshold=-inf)_211"	6.465	0.011	0	1	0
155	200_SelectFromModel(estimator=LogisticRegression(max_iter=10000, multi_class='ovr',
n_jobs=-1, penalty='l1',
random_state=42, solver='saga'),
max_features=1406, threshold=-inf)_422"	1_SelectFromModel(estimator=LogisticRegression(max_iter=10000, multi_class='ovr',
n_jobs=-1, penalty='l1',
random_state=42, solver='saga'),
max_features=1406, threshold=-inf)_527"	5.416	0.04	0	0.999	0.001
156	200_SelectFromModel(estimator=LogisticRegression(max_iter=10000, multi_class='ovr',
n_jobs=-1, penalty='l1',
random_state=42, solver='saga'),
max_features=1406, threshold=-inf)_422"	1_SelectFromModel(estimator=LogisticRegression(max_iter=10000, multi_class='ovr',
n_jobs=-1, penalty='l1',
random_state=42, solver='saga'),
max_features=1406, threshold=-inf)_422"	6.932	0.006	0	1	0
157	200_SelectFromModel(estimator=LogisticRegression(max_iter=10000, multi_class='ovr',
n_jobs=-1, penalty='l1',
random_state=42, solver='saga'),
max_features=1406, threshold=-inf)_422"	100_SelectFromModel(estimator=LogisticRegression(max_iter=10000, multi_class='ovr',
n_jobs=-1, penalty='l1',
random_state=42, solver='saga'),
max_features=1406, threshold=-inf)_211"	10.829	0	0	1	0
158	200_SelectFromModel(estimator=LogisticRegression(max_iter=10000, multi_class='ovr',
n_jobs=-1, penalty='l1',
random_state=42, solver='saga'),
max_features=1406, threshold=-inf)_422"	200_SelectFromModel(estimator=LogisticRegression(max_iter=10000, multi_class='ovr',
n_jobs=-1, penalty='l1',
random_state=42, solver='saga'),
max_features=1406, threshold=-inf)_211"	12.537	0	0	1	0
159	200_SelectFromModel(estimator=LogisticRegression(max_iter=10000, multi_class='ovr',
n_jobs=-1, penalty='l1',
random_state=42, solver='saga'),
max_features=1406, threshold=-inf)_422"	1_SelectFromModel(estimator=LogisticRegression(max_iter=10000, multi_class='ovr',
n_jobs=-1, penalty='l1',
random_state=42, solver='saga'),
max_features=1406, threshold=-inf)_1054"	8.049	0.002	0	1	0
160	200_SelectFromModel(estimator=LogisticRegression(max_iter=10000, multi_class='ovr',
n_jobs=-1, penalty='l1',
random_state=42, solver='saga'),
max_features=1406, threshold=-inf)_422"	1_SelectFromModel(estimator=LogisticRegression(max_iter=10000, multi_class='ovr',
n_jobs=-1, penalty='l1',
random_state=42, solver='saga'),
max_features=1406, threshold=-inf)_211"	13.228	0	0	1	0
161	200_SelectFromModel(estimator=LogisticRegression(max_iter=10000, multi_class='ovr',
n_jobs=-1, penalty='l1',
random_state=42, solver='saga'),
max_features=1406, threshold=-inf)_422"	1_SelectFromModel(estimator=LogisticRegression(max_iter=10000, multi_class='ovr',
n_jobs=-1, penalty='l1',
random_state=42, solver='saga'),
max_features=1406, threshold=-inf)_1406"	6.867	0.007	0	1	0
162	10_SelectFromModel(estimator=LogisticRegression(max_iter=10000, multi_class='ovr',
n_jobs=-1, penalty='l1',
random_state=42, solver='saga'),
max_features=1406, threshold=-inf)_211"	1_SelectFromModel(estimator=LogisticRegression(max_iter=10000, multi_class='ovr',
n_jobs=-1, penalty='l1',
random_state=42, solver='saga'),
max_features=1406, threshold=-inf)_527"	0.647	1	0.049	0.297	0.655
163	10_SelectFromModel(estimator=LogisticRegression(max_iter=10000, multi_class='ovr',
n_jobs=-1, penalty='l1',
random_state=42, solver='saga'),
max_features=1406, threshold=-inf)_211"	1_SelectFromModel(estimator=LogisticRegression(max_iter=10000, multi_class='ovr',
n_jobs=-1, penalty='l1',
random_state=42, solver='saga'),
max_features=1406, threshold=-inf)_422"	1.731	1	0.005	0.594	0.401
164	10_SelectFromModel(estimator=LogisticRegression(max_iter=10000, multi_class='ovr',
n_jobs=-1, penalty='l1',
random_state=42, solver='saga'),
max_features=1406, threshold=-inf)_211"	100_SelectFromModel(estimator=LogisticRegression(max_iter=10000, multi_class='ovr',
n_jobs=-1, penalty='l1',
random_state=42, solver='saga'),
max_features=1406, threshold=-inf)_211"	5.421	0.04	0	0.995	0.005
165	10_SelectFromModel(estimator=LogisticRegression(max_iter=10000, multi_class='ovr',
n_jobs=-1, penalty='l1',
random_state=42, solver='saga'),
max_features=1406, threshold=-inf)_211"	200_SelectFromModel(estimator=LogisticRegression(max_iter=10000, multi_class='ovr',
n_jobs=-1, penalty='l1',
random_state=42, solver='saga'),
max_features=1406, threshold=-inf)_211"	8.786	0.001	0	1	0
166	10_SelectFromModel(estimator=LogisticRegression(max_iter=10000, multi_class='ovr',
n_jobs=-1, penalty='l1',
random_state=42, solver='saga'),
max_features=1406, threshold=-inf)_211"	1_SelectFromModel(estimator=LogisticRegression(max_iter=10000, multi_class='ovr',
n_jobs=-1, penalty='l1',
random_state=42, solver='saga'),
max_features=1406, threshold=-inf)_1054"	4.435	0.155	0	0.996	0.004
167	10_SelectFromModel(estimator=LogisticRegression(max_iter=10000, multi_class='ovr',
n_jobs=-1, penalty='l1',
random_state=42, solver='saga'),
max_features=1406, threshold=-inf)_211"	1_SelectFromModel(estimator=LogisticRegression(max_iter=10000, multi_class='ovr',
n_jobs=-1, penalty='l1',
random_state=42, solver='saga'),
max_features=1406, threshold=-inf)_211"	9.008	0.001	0	1	0
168	10_SelectFromModel(estimator=LogisticRegression(max_iter=10000, multi_class='ovr',
n_jobs=-1, penalty='l1',
random_state=42, solver='saga'),
max_features=1406, threshold=-inf)_211"	1_SelectFromModel(estimator=LogisticRegression(max_iter=10000, multi_class='ovr',
n_jobs=-1, penalty='l1',
random_state=42, solver='saga'),
max_features=1406, threshold=-inf)_1406"	3.771	0.419	0.001	0.992	0.007
169	1_SelectFromModel(estimator=LogisticRegression(max_iter=10000, multi_class='ovr',
n_jobs=-1, penalty='l1',
random_state=42, solver='saga'),
max_features=1406, threshold=-inf)_527"	1_SelectFromModel(estimator=LogisticRegression(max_iter=10000, multi_class='ovr',
n_jobs=-1, penalty='l1',
random_state=42, solver='saga'),
max_features=1406, threshold=-inf)_422"	1.947	1	0	0.136	0.863
170	1_SelectFromModel(estimator=LogisticRegression(max_iter=10000, multi_class='ovr',
n_jobs=-1, penalty='l1',
random_state=42, solver='saga'),
max_features=1406, threshold=-inf)_527"	100_SelectFromModel(estimator=LogisticRegression(max_iter=10000, multi_class='ovr',
n_jobs=-1, penalty='l1',
random_state=42, solver='saga'),
max_features=1406, threshold=-inf)_211"	2.335	1	0.003	0.856	0.14
171	1_SelectFromModel(estimator=LogisticRegression(max_iter=10000, multi_class='ovr',
n_jobs=-1, penalty='l1',
random_state=42, solver='saga'),
max_features=1406, threshold=-inf)_527"	200_SelectFromModel(estimator=LogisticRegression(max_iter=10000, multi_class='ovr',
n_jobs=-1, penalty='l1',
random_state=42, solver='saga'),
max_features=1406, threshold=-inf)_211"	3.587	0.558	0	0.977	0.022
172	1_SelectFromModel(estimator=LogisticRegression(max_iter=10000, multi_class='ovr',
n_jobs=-1, penalty='l1',
random_state=42, solver='saga'),
max_features=1406, threshold=-inf)_527"	1_SelectFromModel(estimator=LogisticRegression(max_iter=10000, multi_class='ovr',
n_jobs=-1, penalty='l1',
random_state=42, solver='saga'),
max_features=1406, threshold=-inf)_1054"	6.835	0.007	0	1	0
173	1_SelectFromModel(estimator=LogisticRegression(max_iter=10000, multi_class='ovr',
n_jobs=-1, penalty='l1',
random_state=42, solver='saga'),
max_features=1406, threshold=-inf)_527"	1_SelectFromModel(estimator=LogisticRegression(max_iter=10000, multi_class='ovr',
n_jobs=-1, penalty='l1',
random_state=42, solver='saga'),
max_features=1406, threshold=-inf)_211"	6.707	0.008	0	1	0
174	1_SelectFromModel(estimator=LogisticRegression(max_iter=10000, multi_class='ovr',
n_jobs=-1, penalty='l1',
random_state=42, solver='saga'),
max_features=1406, threshold=-inf)_527"	1_SelectFromModel(estimator=LogisticRegression(max_iter=10000, multi_class='ovr',
n_jobs=-1, penalty='l1',
random_state=42, solver='saga'),
max_features=1406, threshold=-inf)_1406"	6.408	0.012	0	1	0
175	1_SelectFromModel(estimator=LogisticRegression(max_iter=10000, multi_class='ovr',
n_jobs=-1, penalty='l1',
random_state=42, solver='saga'),
max_features=1406, threshold=-inf)_422"	100_SelectFromModel(estimator=LogisticRegression(max_iter=10000, multi_class='ovr',
n_jobs=-1, penalty='l1',
random_state=42, solver='saga'),
max_features=1406, threshold=-inf)_211"	1.793	1	0.006	0.661	0.333
176	1_SelectFromModel(estimator=LogisticRegression(max_iter=10000, multi_class='ovr',
n_jobs=-1, penalty='l1',
random_state=42, solver='saga'),
max_features=1406, threshold=-inf)_422"	200_SelectFromModel(estimator=LogisticRegression(max_iter=10000, multi_class='ovr',
n_jobs=-1, penalty='l1',
random_state=42, solver='saga'),
max_features=1406, threshold=-inf)_211"	3.258	0.937	0.001	0.946	0.053
177	1_SelectFromModel(estimator=LogisticRegression(max_iter=10000, multi_class='ovr',
n_jobs=-1, penalty='l1',
random_state=42, solver='saga'),
max_features=1406, threshold=-inf)_422"	1_SelectFromModel(estimator=LogisticRegression(max_iter=10000, multi_class='ovr',
n_jobs=-1, penalty='l1',
random_state=42, solver='saga'),
max_features=1406, threshold=-inf)_1054"	4.706	0.106	0	0.994	0.006
178	1_SelectFromModel(estimator=LogisticRegression(max_iter=10000, multi_class='ovr',
n_jobs=-1, penalty='l1',
random_state=42, solver='saga'),
max_features=1406, threshold=-inf)_422"	1_SelectFromModel(estimator=LogisticRegression(max_iter=10000, multi_class='ovr',
n_jobs=-1, penalty='l1',
random_state=42, solver='saga'),
max_features=1406, threshold=-inf)_211"	6.871	0.007	0	1	0
179	1_SelectFromModel(estimator=LogisticRegression(max_iter=10000, multi_class='ovr',
n_jobs=-1, penalty='l1',
random_state=42, solver='saga'),
max_features=1406, threshold=-inf)_422"	1_SelectFromModel(estimator=LogisticRegression(max_iter=10000, multi_class='ovr',
n_jobs=-1, penalty='l1',
random_state=42, solver='saga'),
max_features=1406, threshold=-inf)_1406"	4.466	0.148	0	0.995	0.005
180	100_SelectFromModel(estimator=LogisticRegression(max_iter=10000, multi_class='ovr',
n_jobs=-1, penalty='l1',
random_state=42, solver='saga'),
max_features=1406, threshold=-inf)_211"	200_SelectFromModel(estimator=LogisticRegression(max_iter=10000, multi_class='ovr',
n_jobs=-1, penalty='l1',
random_state=42, solver='saga'),
max_features=1406, threshold=-inf)_211"	4.292	0.191	0	0.328	0.672
181	100_SelectFromModel(estimator=LogisticRegression(max_iter=10000, multi_class='ovr',
n_jobs=-1, penalty='l1',
random_state=42, solver='saga'),
max_features=1406, threshold=-inf)_211"	1_SelectFromModel(estimator=LogisticRegression(max_iter=10000, multi_class='ovr',
n_jobs=-1, penalty='l1',
random_state=42, solver='saga'),
max_features=1406, threshold=-inf)_1054"	1.851	1	0.009	0.776	0.215
182	100_SelectFromModel(estimator=LogisticRegression(max_iter=10000, multi_class='ovr',
n_jobs=-1, penalty='l1',
random_state=42, solver='saga'),
max_features=1406, threshold=-inf)_211"	1_SelectFromModel(estimator=LogisticRegression(max_iter=10000, multi_class='ovr',
n_jobs=-1, penalty='l1',
random_state=42, solver='saga'),
max_features=1406, threshold=-inf)_211"	3.007	1	0.001	0.921	0.078
183	100_SelectFromModel(estimator=LogisticRegression(max_iter=10000, multi_class='ovr',
n_jobs=-1, penalty='l1',
random_state=42, solver='saga'),
max_features=1406, threshold=-inf)_211"	1_SelectFromModel(estimator=LogisticRegression(max_iter=10000, multi_class='ovr',
n_jobs=-1, penalty='l1',
random_state=42, solver='saga'),
max_features=1406, threshold=-inf)_1406"	1.894	1	0.012	0.842	0.146
184	200_SelectFromModel(estimator=LogisticRegression(max_iter=10000, multi_class='ovr',
n_jobs=-1, penalty='l1',
random_state=42, solver='saga'),
max_features=1406, threshold=-inf)_211"	1_SelectFromModel(estimator=LogisticRegression(max_iter=10000, multi_class='ovr',
n_jobs=-1, penalty='l1',
random_state=42, solver='saga'),
max_features=1406, threshold=-inf)_1054"	0.891	1	0.042	0.437	0.521
185	200_SelectFromModel(estimator=LogisticRegression(max_iter=10000, multi_class='ovr',
n_jobs=-1, penalty='l1',
random_state=42, solver='saga'),
max_features=1406, threshold=-inf)_211"	1_SelectFromModel(estimator=LogisticRegression(max_iter=10000, multi_class='ovr',
n_jobs=-1, penalty='l1',
random_state=42, solver='saga'),
max_features=1406, threshold=-inf)_211"	1.886	1	0.003	0.591	0.405
186	200_SelectFromModel(estimator=LogisticRegression(max_iter=10000, multi_class='ovr',
n_jobs=-1, penalty='l1',
random_state=42, solver='saga'),
max_features=1406, threshold=-inf)_211"	1_SelectFromModel(estimator=LogisticRegression(max_iter=10000, multi_class='ovr',
n_jobs=-1, penalty='l1',
random_state=42, solver='saga'),
max_features=1406, threshold=-inf)_1406"	1.137	1	0.04	0.618	0.342
187	1_SelectFromModel(estimator=LogisticRegression(max_iter=10000, multi_class='ovr',
n_jobs=-1, penalty='l1',
random_state=42, solver='saga'),
max_features=1406, threshold=-inf)_1054"	1_SelectFromModel(estimator=LogisticRegression(max_iter=10000, multi_class='ovr',
n_jobs=-1, penalty='l1',
random_state=42, solver='saga'),
max_features=1406, threshold=-inf)_211"	0.399	1	0.058	0.187	0.755
188	1_SelectFromModel(estimator=LogisticRegression(max_iter=10000, multi_class='ovr',
n_jobs=-1, penalty='l1',
random_state=42, solver='saga'),
max_features=1406, threshold=-inf)_1054"	1_SelectFromModel(estimator=LogisticRegression(max_iter=10000, multi_class='ovr',
n_jobs=-1, penalty='l1',
random_state=42, solver='saga'),
max_features=1406, threshold=-inf)_1406"	1.301	1	0.002	0.136	0.862
189	1_SelectFromModel(estimator=LogisticRegression(max_iter=10000, multi_class='ovr',
n_jobs=-1, penalty='l1',
random_state=42, solver='saga'),
max_features=1406, threshold=-inf)_211"	1_SelectFromModel(estimator=LogisticRegression(max_iter=10000, multi_class='ovr',
n_jobs=-1, penalty='l1',
random_state=42, solver='saga'),
max_features=1406, threshold=-inf)_1406"	0.216	1	0.137	0.242	0.621

## Sheet: Logit_SVC_Dmodels_cross-valid
kernel	params	rank_test_score	mean_test_score	std_test_score
10_SelectFromModel(estimator=LogisticRegression(max_iter=10000, multi_class='ovr',
n_jobs=-1, penalty='l1',
random_state=42, solver='saga'),
max_features=1406, threshold=-inf)_1406"	{'classify__C': 10, 'feature_selection': SelectFromModel(estimator=LogisticRegression(max_iter=10000, multi_class='ovr',
n_jobs=-1, penalty='l1',
random_state=42, solver='saga'),
max_features=1406, threshold=-inf), 'feature_selection__max_features': 1406}"	1	0.619153	0.0212261
10_SelectFromModel(estimator=LogisticRegression(max_iter=10000, multi_class='ovr',
n_jobs=-1, penalty='l1',
random_state=42, solver='saga'),
max_features=1406, threshold=-inf)_1054"	{'classify__C': 10, 'feature_selection': SelectFromModel(estimator=LogisticRegression(max_iter=10000, multi_class='ovr',
n_jobs=-1, penalty='l1',
random_state=42, solver='saga'),
max_features=1406, threshold=-inf), 'feature_selection__max_features': 1054}"	2	0.607319	0.0238973
100_SelectFromModel(estimator=LogisticRegression(max_iter=10000, multi_class='ovr',
n_jobs=-1, penalty='l1',
random_state=42, solver='saga'),
max_features=1406, threshold=-inf)_1406"	{'classify__C': 100, 'feature_selection': SelectFromModel(estimator=LogisticRegression(max_iter=10000, multi_class='ovr',
n_jobs=-1, penalty='l1',
random_state=42, solver='saga'),
max_features=1406, threshold=-inf), 'feature_selection__max_features': 1406}"	3	0.606055	0.0238396
200_SelectFromModel(estimator=LogisticRegression(max_iter=10000, multi_class='ovr',
n_jobs=-1, penalty='l1',
random_state=42, solver='saga'),
max_features=1406, threshold=-inf)_1406"	{'classify__C': 200, 'feature_selection': SelectFromModel(estimator=LogisticRegression(max_iter=10000, multi_class='ovr',
n_jobs=-1, penalty='l1',
random_state=42, solver='saga'),
max_features=1406, threshold=-inf), 'feature_selection__max_features': 1406}"	3	0.606055	0.0238396
10_SelectFromModel(estimator=LogisticRegression(max_iter=10000, multi_class='ovr',
n_jobs=-1, penalty='l1',
random_state=42, solver='saga'),
max_features=1406, threshold=-inf)_527"	{'classify__C': 10, 'feature_selection': SelectFromModel(estimator=LogisticRegression(max_iter=10000, multi_class='ovr',
n_jobs=-1, penalty='l1',
random_state=42, solver='saga'),
max_features=1406, threshold=-inf), 'feature_selection__max_features': 527}"	5	0.602276	0.0287554
100_SelectFromModel(estimator=LogisticRegression(max_iter=10000, multi_class='ovr',
n_jobs=-1, penalty='l1',
random_state=42, solver='saga'),
max_features=1406, threshold=-inf)_1054"	{'classify__C': 100, 'feature_selection': SelectFromModel(estimator=LogisticRegression(max_iter=10000, multi_class='ovr',
n_jobs=-1, penalty='l1',
random_state=42, solver='saga'),
max_features=1406, threshold=-inf), 'feature_selection__max_features': 1054}"	6	0.594386	0.024935
200_SelectFromModel(estimator=LogisticRegression(max_iter=10000, multi_class='ovr',
n_jobs=-1, penalty='l1',
random_state=42, solver='saga'),
max_features=1406, threshold=-inf)_1054"	{'classify__C': 200, 'feature_selection': SelectFromModel(estimator=LogisticRegression(max_iter=10000, multi_class='ovr',
n_jobs=-1, penalty='l1',
random_state=42, solver='saga'),
max_features=1406, threshold=-inf), 'feature_selection__max_features': 1054}"	7	0.593966	0.0246893
10_SelectFromModel(estimator=LogisticRegression(max_iter=10000, multi_class='ovr',
n_jobs=-1, penalty='l1',
random_state=42, solver='saga'),
max_features=1406, threshold=-inf)_422"	{'classify__C': 10, 'feature_selection': SelectFromModel(estimator=LogisticRegression(max_iter=10000, multi_class='ovr',
n_jobs=-1, penalty='l1',
random_state=42, solver='saga'),
max_features=1406, threshold=-inf), 'feature_selection__max_features': 422}"	8	0.584755	0.0337366
100_SelectFromModel(estimator=LogisticRegression(max_iter=10000, multi_class='ovr',
n_jobs=-1, penalty='l1',
random_state=42, solver='saga'),
max_features=1406, threshold=-inf)_527"	{'classify__C': 100, 'feature_selection': SelectFromModel(estimator=LogisticRegression(max_iter=10000, multi_class='ovr',
n_jobs=-1, penalty='l1',
random_state=42, solver='saga'),
max_features=1406, threshold=-inf), 'feature_selection__max_features': 527}"	9	0.583631	0.0315034
200_SelectFromModel(estimator=LogisticRegression(max_iter=10000, multi_class='ovr',
n_jobs=-1, penalty='l1',
random_state=42, solver='saga'),
max_features=1406, threshold=-inf)_527"	{'classify__C': 200, 'feature_selection': SelectFromModel(estimator=LogisticRegression(max_iter=10000, multi_class='ovr',
n_jobs=-1, penalty='l1',
random_state=42, solver='saga'),
max_features=1406, threshold=-inf), 'feature_selection__max_features': 527}"	10	0.582726	0.0317782
100_SelectFromModel(estimator=LogisticRegression(max_iter=10000, multi_class='ovr',
n_jobs=-1, penalty='l1',
random_state=42, solver='saga'),
max_features=1406, threshold=-inf)_422"	{'classify__C': 100, 'feature_selection': SelectFromModel(estimator=LogisticRegression(max_iter=10000, multi_class='ovr',
n_jobs=-1, penalty='l1',
random_state=42, solver='saga'),
max_features=1406, threshold=-inf), 'feature_selection__max_features': 422}"	11	0.572534	0.0391664
200_SelectFromModel(estimator=LogisticRegression(max_iter=10000, multi_class='ovr',
n_jobs=-1, penalty='l1',
random_state=42, solver='saga'),
max_features=1406, threshold=-inf)_422"	{'classify__C': 200, 'feature_selection': SelectFromModel(estimator=LogisticRegression(max_iter=10000, multi_class='ovr',
n_jobs=-1, penalty='l1',
random_state=42, solver='saga'),
max_features=1406, threshold=-inf), 'feature_selection__max_features': 422}"	12	0.569682	0.0388288
10_SelectFromModel(estimator=LogisticRegression(max_iter=10000, multi_class='ovr',
n_jobs=-1, penalty='l1',
random_state=42, solver='saga'),
max_features=1406, threshold=-inf)_211"	{'classify__C': 10, 'feature_selection': SelectFromModel(estimator=LogisticRegression(max_iter=10000, multi_class='ovr',
n_jobs=-1, penalty='l1',
random_state=42, solver='saga'),
max_features=1406, threshold=-inf), 'feature_selection__max_features': 211}"	13	0.521672	0.0315979
1_SelectFromModel(estimator=LogisticRegression(max_iter=10000, multi_class='ovr',
n_jobs=-1, penalty='l1',
random_state=42, solver='saga'),
max_features=1406, threshold=-inf)_527"	{'classify__C': 1, 'feature_selection': SelectFromModel(estimator=LogisticRegression(max_iter=10000, multi_class='ovr',
n_jobs=-1, penalty='l1',
random_state=42, solver='saga'),
max_features=1406, threshold=-inf), 'feature_selection__max_features': 527}"	14	0.516283	0.0189231
1_SelectFromModel(estimator=LogisticRegression(max_iter=10000, multi_class='ovr',
n_jobs=-1, penalty='l1',
random_state=42, solver='saga'),
max_features=1406, threshold=-inf)_422"	{'classify__C': 1, 'feature_selection': SelectFromModel(estimator=LogisticRegression(max_iter=10000, multi_class='ovr',
n_jobs=-1, penalty='l1',
random_state=42, solver='saga'),
max_features=1406, threshold=-inf), 'feature_selection__max_features': 422}"	15	0.510033	0.0215624
100_SelectFromModel(estimator=LogisticRegression(max_iter=10000, multi_class='ovr',
n_jobs=-1, penalty='l1',
random_state=42, solver='saga'),
max_features=1406, threshold=-inf)_211"	{'classify__C': 100, 'feature_selection': SelectFromModel(estimator=LogisticRegression(max_iter=10000, multi_class='ovr',
n_jobs=-1, penalty='l1',
random_state=42, solver='saga'),
max_features=1406, threshold=-inf), 'feature_selection__max_features': 211}"	16	0.496877	0.0283667
200_SelectFromModel(estimator=LogisticRegression(max_iter=10000, multi_class='ovr',
n_jobs=-1, penalty='l1',
random_state=42, solver='saga'),
max_features=1406, threshold=-inf)_211"	{'classify__C': 200, 'feature_selection': SelectFromModel(estimator=LogisticRegression(max_iter=10000, multi_class='ovr',
n_jobs=-1, penalty='l1',
random_state=42, solver='saga'),
max_features=1406, threshold=-inf), 'feature_selection__max_features': 211}"	17	0.487844	0.0288933
1_SelectFromModel(estimator=LogisticRegression(max_iter=10000, multi_class='ovr',
n_jobs=-1, penalty='l1',
random_state=42, solver='saga'),
max_features=1406, threshold=-inf)_1054"	{'classify__C': 1, 'feature_selection': SelectFromModel(estimator=LogisticRegression(max_iter=10000, multi_class='ovr',
n_jobs=-1, penalty='l1',
random_state=42, solver='saga'),
max_features=1406, threshold=-inf), 'feature_selection__max_features': 1054}"	18	0.479385	0.0207039
1_SelectFromModel(estimator=LogisticRegression(max_iter=10000, multi_class='ovr',
n_jobs=-1, penalty='l1',
random_state=42, solver='saga'),
max_features=1406, threshold=-inf)_211"	{'classify__C': 1, 'feature_selection': SelectFromModel(estimator=LogisticRegression(max_iter=10000, multi_class='ovr',
n_jobs=-1, penalty='l1',
random_state=42, solver='saga'),
max_features=1406, threshold=-inf), 'feature_selection__max_features': 211}"	19	0.476401	0.0295444
1_SelectFromModel(estimator=LogisticRegression(max_iter=10000, multi_class='ovr',
n_jobs=-1, penalty='l1',
random_state=42, solver='saga'),
max_features=1406, threshold=-inf)_1406"	{'classify__C': 1, 'feature_selection': SelectFromModel(estimator=LogisticRegression(max_iter=10000, multi_class='ovr',
n_jobs=-1, penalty='l1',
random_state=42, solver='saga'),
max_features=1406, threshold=-inf), 'feature_selection__max_features': 1406}"	20	0.474118	0.0185099

## Sheet: Logit_SVC_Amodels_perfomances
	model_1	model_2	t_stat	p_val	worse_prob	better_prob	rope_prob
0	10_SelectFromModel(estimator=LogisticRegression(max_iter=10000, multi_class='ovr',
n_jobs=-1, penalty='l1',
random_state=42, solver='saga'),
max_features=1378, threshold=-inf)_1378"	100_SelectFromModel(estimator=LogisticRegression(max_iter=10000, multi_class='ovr',
n_jobs=-1, penalty='l1',
random_state=42, solver='saga'),
max_features=1378, threshold=-inf)_1378"	1.005	1	0	0	1
1	10_SelectFromModel(estimator=LogisticRegression(max_iter=10000, multi_class='ovr',
n_jobs=-1, penalty='l1',
random_state=42, solver='saga'),
max_features=1378, threshold=-inf)_1378"	200_SelectFromModel(estimator=LogisticRegression(max_iter=10000, multi_class='ovr',
n_jobs=-1, penalty='l1',
random_state=42, solver='saga'),
max_features=1378, threshold=-inf)_1378"	1.005	1	0	0	1
2	10_SelectFromModel(estimator=LogisticRegression(max_iter=10000, multi_class='ovr',
n_jobs=-1, penalty='l1',
random_state=42, solver='saga'),
max_features=1378, threshold=-inf)_1378"	10_SelectFromModel(estimator=LogisticRegression(max_iter=10000, multi_class='ovr',
n_jobs=-1, penalty='l1',
random_state=42, solver='saga'),
max_features=1378, threshold=-inf)_1034"	0.536	1	0.001	0.003	0.996
3	10_SelectFromModel(estimator=LogisticRegression(max_iter=10000, multi_class='ovr',
n_jobs=-1, penalty='l1',
random_state=42, solver='saga'),
max_features=1378, threshold=-inf)_1378"	100_SelectFromModel(estimator=LogisticRegression(max_iter=10000, multi_class='ovr',
n_jobs=-1, penalty='l1',
random_state=42, solver='saga'),
max_features=1378, threshold=-inf)_1034"	0.549	1	0.001	0.003	0.997
4	10_SelectFromModel(estimator=LogisticRegression(max_iter=10000, multi_class='ovr',
n_jobs=-1, penalty='l1',
random_state=42, solver='saga'),
max_features=1378, threshold=-inf)_1378"	200_SelectFromModel(estimator=LogisticRegression(max_iter=10000, multi_class='ovr',
n_jobs=-1, penalty='l1',
random_state=42, solver='saga'),
max_features=1378, threshold=-inf)_1034"	0.549	1	0.001	0.003	0.997
5	10_SelectFromModel(estimator=LogisticRegression(max_iter=10000, multi_class='ovr',
n_jobs=-1, penalty='l1',
random_state=42, solver='saga'),
max_features=1378, threshold=-inf)_1378"	100_SelectFromModel(estimator=LogisticRegression(max_iter=10000, multi_class='ovr',
n_jobs=-1, penalty='l1',
random_state=42, solver='saga'),
max_features=1378, threshold=-inf)_517"	3.795	0.223	0	0.968	0.031
6	10_SelectFromModel(estimator=LogisticRegression(max_iter=10000, multi_class='ovr',
n_jobs=-1, penalty='l1',
random_state=42, solver='saga'),
max_features=1378, threshold=-inf)_1378"	200_SelectFromModel(estimator=LogisticRegression(max_iter=10000, multi_class='ovr',
n_jobs=-1, penalty='l1',
random_state=42, solver='saga'),
max_features=1378, threshold=-inf)_517"	3.795	0.223	0	0.968	0.031
7	10_SelectFromModel(estimator=LogisticRegression(max_iter=10000, multi_class='ovr',
n_jobs=-1, penalty='l1',
random_state=42, solver='saga'),
max_features=1378, threshold=-inf)_1378"	10_SelectFromModel(estimator=LogisticRegression(max_iter=10000, multi_class='ovr',
n_jobs=-1, penalty='l1',
random_state=42, solver='saga'),
max_features=1378, threshold=-inf)_517"	4.086	0.143	0	0.977	0.023
8	10_SelectFromModel(estimator=LogisticRegression(max_iter=10000, multi_class='ovr',
n_jobs=-1, penalty='l1',
random_state=42, solver='saga'),
max_features=1378, threshold=-inf)_1378"	100_SelectFromModel(estimator=LogisticRegression(max_iter=10000, multi_class='ovr',
n_jobs=-1, penalty='l1',
random_state=42, solver='saga'),
max_features=1378, threshold=-inf)_413"	4.282	0.107	0	0.993	0.007
9	10_SelectFromModel(estimator=LogisticRegression(max_iter=10000, multi_class='ovr',
n_jobs=-1, penalty='l1',
random_state=42, solver='saga'),
max_features=1378, threshold=-inf)_1378"	200_SelectFromModel(estimator=LogisticRegression(max_iter=10000, multi_class='ovr',
n_jobs=-1, penalty='l1',
random_state=42, solver='saga'),
max_features=1378, threshold=-inf)_413"	4.282	0.107	0	0.993	0.007
10	10_SelectFromModel(estimator=LogisticRegression(max_iter=10000, multi_class='ovr',
n_jobs=-1, penalty='l1',
random_state=42, solver='saga'),
[truncated: 662 more rows]

## Sheet: Logit_SVC_Amodels_cross-valid
kernel	params	rank_test_score	mean_test_score	std_test_score
[truncated: 105 more rows]
