# Supplementary material for: Molecularly stratified hypothalamic astrocytes are cellular foci for obesity
Source: Research Square preprint supplement (doi:10.21203/rs.3.rs-3748581/v1), 2024-02-09
Supplement: Supplementary file 2 [file 24b659f728b809f5d96eb5e8.xlsx]

## Sheet: Aggregated_subregion_signatures
gene	Score_specificity	Score_magnitude	class
Gria1	7.5744e-09	6.51308e-09	ARC
Msi2	2.39388e-08	1.48815e-07	ARC
Itih3	0.000172725	9.14482e-05	ARC
Trpm3	0.000364839	0.00358518	ARC
Pid1	0.000569317	0.00215141	ARC
Lgi1	0.00288953	0.00204317	ARC
Slc7a11	0.00317945	0.00119347	ARC
Lars2	0.00390768	0.00390768	ARC
Mdga2	0.00449463	0.0106737	ARC
St3gal4	0.00490408	0.001735	ARC
Slc1a2	0.00523909	0.0151405	ARC
Prex2	0.00657913	0.00523909	ARC
Ttc3	0.00676524	0.00535076	ARC
Agt	0.00695136	0.00549965	ARC
Kank1	0.00702581	0.0127954	ARC
Slc6a11	0.00747248	0.0171505	ARC
Scmh1	0.00758415	0.00758415	ARC
Lrrc4c	0.0076586	0.0145449	ARC
Actn1	0.0078125	0.0078125	ARC
Sparc	0.00784472	0.0104503	ARC
Six3os1	0.0117145	0.0234032	ARC
Eps15	0.0117145	0.0389481	ARC
Adk	0.0132421	0.0148055	ARC
Epdr1	0.0142099	0.0191606	ARC
Plce1	0.0146193	0.013726	ARC
Rmst	0.014731	0.00724915	ARC
Nfat5	0.015401	0.0120882	ARC
Ext2	0.0156135	0.0195098	ARC
Ltbp1	0.0156135	0.0234032	ARC
Nav2	0.0156135	0.119813	ARC
App	0.0161827	0.00892419	ARC
Kcnma1	0.01823	0.0201656	ARC
Tef	0.0188256	0.0184161	ARC
Actg1	0.0195098	0.00390768	ARC
Mxi1	0.0195098	0.0078125	ARC
Igf1r	0.0199795	0.015736	ARC
Gse1	0.0234032	0.00390768	ARC
Nrxn3	0.0272937	0.0389481	ARC
Kcnip4	0.0272937	0.0195098	ARC
Ttc28	0.0311813	0.165461	ARC
Bbs9	0.0311813	0.0156135	ARC
Elavl1	0.0350661	0.119813	ARC
Zfp407	0.0389481	0.0234032	ARC
Rap1gds1	0.0428272	0.0156135	ARC
Scap	0.0467035	0.0776111	ARC
Kmt2a	0.0505769	0.14649	ARC
Gabrb1	0.0544474	0.066042	ARC
Acss3	0.0544474	0.0350661	ARC
Six3	0.0583151	0.0737576	ARC
Cadm2	0.0583151	0.23046	ARC
Aff4	0.0583151	0.0389481	ARC
Thra	0.066042	0.161673	ARC
Gpm6a	0.066042	0.179646	ARC
Ntm	0.066042	0.303746	ARC
Firre	0.0699012	0.0814618	ARC
Stimate	0.0737576	0.0853096	ARC
Stx4a	0.0776111	0.0428272	ARC
5031439G07Rik	0.0814618	0.0467035	ARC
Kdm5c	0.0814618	0.0428272	ARC
Pip4p1	0.0853096	0.0311813	ARC
Itfg1	0.0891546	0.0853096	ARC
Peg3	0.0891546	0.100673	ARC
Cdk8	0.0891546	0.0311813	ARC
Rnf216	0.0929968	0.066042	ARC
Cadm1	0.0929968	0.0891546	ARC
Aplp2	0.0968361	0.123632	ARC
Sirpa	0.0968361	0.11599	ARC
Cacna1d	0.0968361	0.193795	ARC
Sox1	0.100673	0.0272937	ARC
Arid2	0.100673	0.179646	ARC
Gpc5	0.104506	0.358241	ARC
Sgip1	0.108337	0.0505769	ARC
Pde7b	0.108337	0.066042	ARC
Trip12	0.108337	0.0505769	ARC
Sh3pxd2b	0.112165	0.154087	ARC
Mapre3	0.112165	0.15029	ARC
Heyl	0.11599	0.15029	ARC
Ckb	0.11599	0.182479	ARC
Pitpnc1	0.11599	0.215427	ARC
Dido1	0.11599	0.127449	ARC
Omg	0.119813	0.11599	ARC
Wdr20	0.119813	0.18531	ARC
Cox7a2l	0.123632	0.142688	ARC
Kcnq3	0.123632	0.0350661	ARC
Csmd2	0.127449	0.127449	ARC
Hacd3	0.127449	0.154087	ARC
Gpld1	0.127449	0.100673	ARC
Rgs7bp	0.127449	0.0737576	ARC
Crim1	0.131263	0.0929968	ARC
Lncpint	0.135074	0.131263	ARC
Sdha	0.138882	0.0428272	ARC
Pabpn1	0.14649	0.112165	ARC
Atp1a2	0.14649	0.393945	ARC
Nfkb1	0.15029	0.100673	ARC
Kdm6a	0.15029	0.168301	ARC
Ccnl2	0.154087	0.135074	ARC
Slit2	0.154087	0.0776111	ARC
Zfand3	0.154087	0.157881	ARC
Fry	0.157881	0.104506	ARC
Akap7	0.157881	0.0544474	ARC
Lsamp	0.157881	0.453137	ARC
Sgcd	0.161673	0.0078125	ARC
Slc12a6	0.161673	0.0583151	ARC
Rev3l	0.165461	0.0891546	ARC
Psip1	0.165461	0.127449	ARC
Ptprd	0.165461	0.119813	ARC
Arl6ip5	0.168301	0.0699012	ARC
Zmiz1	0.168301	0.202268	ARC
Lrrc8a	0.171139	0.06218	ARC
Pcdh11x	0.176812	0.199445	ARC
Zzz3	0.179646	0.0814618	ARC
Mmd2	0.182479	0.176812	ARC
Grik2	0.18531	0.196621	ARC
mt-Co1	0.18531	0.06218	ARC
Zfhx3	0.190968	0.138882	ARC
Zfyve9	0.190968	0.0814618	ARC
Snrnp70	0.193795	0.161673	ARC
Gphn	0.193795	0.300928	ARC
Xpo1	0.193795	0.20509	ARC
Asxl1	0.196621	0.154087	ARC
Tmc7	0.202268	0.173976	ARC
Ntsr2	0.202268	0.299988	ARC
Fam107a	0.20509	0.171139	ARC
mt-Co2	0.20509	0.14649	ARC
Nap1l5	0.20697	0.171139	ARC
Erbb4	0.20885	0.344148	ARC
Gpc6	0.210729	0.176812	ARC
Cdh20	0.211669	0.212608	ARC
Nlgn1	0.212608	0.428709	ARC
Psap	0.214488	0.288713	ARC
Fam20a	0.220125	0.248312	ARC
Ptprm	0.221064	0.142688	ARC
Dgkb	0.222004	0.352604	ARC
Tmcc3	0.224823	0.233279	ARC
Atad2b	0.228581	0.210729	ARC
Ntrk2	0.23046	0.396763	ARC
Phka1	0.233279	0.182479	ARC
Phyhd1	0.237977	0.20885	ARC
Atp13a4	0.238916	0.258647	ARC
Cntn1	0.241735	0.20509	ARC
Mbp	0.242675	0.00390768	ARC
Ttll3	0.243614	0.173976	ARC
Adgrl3	0.244554	0.514209	ARC
mt-Nd4	0.247372	0.40334	ARC
mt-Cytb	0.250191	0.36106	ARC
Zyg11b	0.251131	0.27368	ARC
Ppargc1a	0.25301	0.420253	ARC
Ank2	0.254889	0.433406	ARC
B3galt1	0.255828	0.311263	ARC
Tmem47	0.257708	0.280257	ARC
Slc4a4	0.259587	0.547094	ARC
Gm12239	0.262405	0.154087	ARC
Gpr37l1	0.265224	0.314082	ARC
Pcsk1n	0.267103	0.0544474	ARC
Rgl1	0.270861	0.304686	ARC
Nr3c2	0.272741	0.226702	ARC
Mgat4c	0.277438	0.257708	ARC
Gramd1b	0.280257	0.429648	ARC
Tmem164	0.284015	0.269922	ARC
mt-Nd2	0.286834	0.439044	ARC
Phactr1	0.288713	0.264285	ARC
Car10	0.291532	0.224823	ARC
Map4	0.293411	0.330054	ARC
Adgrb3	0.298109	0.542396	ARC
Cap2	0.299048	0.307505	ARC
mt-Nd4l	0.303746	0.244554	ARC
Itsn1	0.304686	0.237037	ARC
Itga6	0.305625	0.281197	ARC
Srebf1	0.306565	0.377972	ARC
Lama2	0.308444	0.326296	ARC
Mical2	0.311263	0.310323	ARC
Magi2	0.314082	0.408038	ARC
Mllt10	0.315021	0.488841	ARC
Rora	0.31784	0.46911	ARC
Stim1	0.318779	0.355422	ARC
Abhd14b	0.321598	0.276499	ARC
Sat1	0.324417	0.272741	ARC
Abr	0.326296	0.405219	ARC
Mtss2	0.328175	0.306565	ARC
Mir100hg	0.330994	0.291532	ARC
Ubn2	0.331933	0.284955	ARC
Gm40578	0.334752	0.262405	ARC
Sox6	0.335692	0.442802	ARC
Gaa	0.337571	0.228581	ARC
Astn2	0.33851	0.375153	ARC
Vegfa	0.33945	0.229521	ARC
Ivd	0.342269	0.251131	ARC
Igsf8	0.343208	0.29623	ARC
Slc39a12	0.344148	0.415555	ARC
Adgrb1	0.345087	0.301867	ARC
Camk1d	0.346966	0.560248	ARC
Etnppl	0.349785	0.165461	ARC
Fgf14	0.350725	0.369516	ARC
Paqr6	0.352604	0.364818	ARC
Brinp3	0.354483	0.293411	ARC
Hdac8	0.356362	0.385489	ARC
Nipbl	0.357302	0.345087	ARC
Psd2	0.359181	0.254889	ARC
Ece1	0.36012	0.222004	ARC
Clstn1	0.362939	0.336631	ARC
Hipk2	0.363879	0.368576	ARC
Cdk19	0.364818	0.245493	ARC
Cep85l	0.367637	0.33945	ARC
Lrmda	0.370456	0.218246	ARC
Folh1	0.371395	0.601589	ARC
Gjb6	0.374214	0.284015	ARC
9430041J12Rik	0.375153	0.377032	ARC
Sfrp5	0.377972	0.323477	ARC
Npas3	0.378912	0.586556	ARC
Nr1d2	0.379851	0.411796	ARC
9330159F19Rik	0.38267	0.42495	ARC
Pdgfd	0.384549	0.240795	ARC
Limch1	0.385489	0.464412	ARC
Nxn	0.386428	0.324417	ARC
Nebl	0.389247	0.51233	ARC
Atp2b1	0.391126	0.343208	ARC
Rgs6	0.393945	0.267103	ARC
Tcf4	0.394884	0.543336	ARC
Timp3	0.395824	0.594072	ARC
Srsf2	0.397703	0.445621	ARC
Nf1	0.398643	0.59877	ARC
Tafa5	0.399582	0.460654	ARC
Son	0.400522	0.595951	ARC
Nwd1	0.401461	0.544275	ARC
Vamp2	0.402401	0.333812	ARC
Phlpp1	0.40334	0.465352	ARC
N4bp2l2	0.40428	0.48978	ARC
Appl2	0.406159	0.332873	ARC
Zbtb20	0.408038	0.558369	ARC
Syne1	0.409917	0.341329	ARC
Plod1	0.410857	0.320659	ARC
Zmym4	0.411796	0.583737	ARC
Pik3ip1	0.412736	0.537698	ARC
Abcc5	0.413676	0.259587	ARC
Nfia	0.414615	0.591254	ARC
Tanc2	0.415555	0.466291	ARC
Mro	0.417434	0.562127	ARC
Stag1	0.419313	0.571523	ARC
Pbx1	0.420253	0.524544	ARC
Lrig1	0.422132	0.391126	ARC
Fmn2	0.42495	0.611924	ARC
Ddhd1	0.426829	0.436225	ARC
Spag9	0.427769	0.463473	ARC
Agbl4	0.429648	0.25301	ARC
Dtna	0.431527	0.531121	ARC
Camk2d	0.432467	0.550852	ARC
Clasp2	0.434346	0.472868	ARC
Wdpcp	0.435286	0.392066	ARC
Sptbn1	0.439983	0.603468	ARC
mt-Atp6	0.442802	0.567764	ARC
Anks1	0.443742	0.362939	ARC
Acsl3	0.44656	0.496357	ARC
Farp1	0.449379	0.319719	ARC
Pip4k2a	0.450319	0.532061	ARC
Fat3	0.452198	0.431527	ARC
Sdc4	0.455016	0.441863	ARC
Wsb1	0.455956	0.398643	ARC
Atp6v0c	0.457835	0.414615	ARC
Zfp280c	0.458775	0.370456	ARC
S1pr1	0.460654	0.589374	ARC
Npas2	0.461593	0.351664	ARC
Chd9	0.465352	0.455956	ARC
Efr3b	0.466291	0.456896	ARC
Mitf	0.467231	0.400522	ARC
Bcl2	0.46817	0.595012	ARC
Grk3	0.46911	0.51327	ARC
Rgs20	0.47005	0.410857	ARC
Gab2	0.473808	0.397703	ARC
Nav3	0.478506	0.3169	ARC
Srpk2	0.479445	0.509511	ARC
Snhg20	0.480385	0.421192	ARC
Dync1h1	0.482264	0.459714	ARC
Ablim1	0.484143	0.549913	ARC
Lrba	0.486022	0.379851	ARC
Aplp1	0.488841	0.350725	ARC
Dtx1	0.48978	0.409917	ARC
Tnrc6b	0.49072	0.614743	ARC
Scg3	0.49166	0.541457	ARC
Crebbp	0.493539	0.563067	ARC
Kidins220	0.494478	0.399582	ARC
Dennd4a	0.495418	0.374214	ARC
Mkln1	0.496357	0.38173	ARC
Lfng	0.497297	0.593133	ARC
Mllt3	0.498237	0.505753	ARC
Nrbp2	0.500116	0.585616	ARC
Cog5	0.501055	0.297169	ARC
Dmd	0.502934	0.474747	ARC
Mtmr3	0.503874	0.526424	ARC
Macf1	0.506693	0.55649	ARC
Gpatch8	0.507632	0.529242	ARC
Wdr17	0.508572	0.523605	ARC
Cpeb1	0.509511	0.380791	ARC
Pcca	0.51327	0.506693	ARC
Plcb1	0.516088	0.388307	ARC
Ncam1	0.517028	0.607226	ARC
Tmtc2	0.519847	0.347906	ARC
Phkg1	0.522665	0.480385	ARC
Faf1	0.523605	0.427769	ARC
mt-Nd1	0.526424	0.540517	ARC
Rprd1a	0.527363	0.376093	ARC
Abcd2	0.529242	0.504813	ARC
Kansl1l	0.530182	0.412736	ARC
Adgrl1	0.532061	0.498237	ARC
Gtf2ird1	0.533	0.394884	ARC
Vti1a	0.53488	0.606287	ARC
Klf12	0.536759	0.518907	ARC
Kmt2e	0.537698	0.483203	ARC
mt-Nd5	0.540517	0.493539	ARC
Gli2	0.542396	0.508572	ARC
Eda	0.543336	0.434346	ARC
Tmod2	0.545215	0.487901	ARC
Metap1d	0.546154	0.361999	ARC
Fgf1	0.547094	0.457835	ARC
Pde4d	0.548034	0.564946	ARC
Ldlrad4	0.548973	0.330994	ARC
Pbxip1	0.549913	0.389247	ARC
Plcb4	0.551792	0.516088	ARC
Nol4	0.552731	0.564006	ARC
mt-Nd3	0.554611	0.609105	ARC
Mir99ahg	0.55555	0.596891	ARC
Sfxn5	0.55649	0.500116	ARC
Setd3	0.557429	0.443742	ARC
D030047H15Rik	0.559308	0.354483	ARC
Rtn1	0.561187	0.278378	ARC
Rbm6	0.562127	0.613803	ARC
Uty	0.563067	0.579039	ARC
Gja1	0.564946	0.59971	ARC
Mfn1	0.566825	0.581858	ARC
Frmpd1	0.567764	0.569644	ARC
Slc6a9	0.568704	0.592193	ARC
Gm9925	0.570583	0.383609	ARC
Gm20713	0.572462	0.417434	ARC
Eva1a	0.574341	0.528303	ARC
Daam1	0.575281	0.418373	ARC
Fnip1	0.576221	0.522665	ARC
Luc7l2	0.57716	0.53488	ARC
Mbnl2	0.5781	0.590314	ARC
Bach2	0.579979	0.548034	ARC
Fam135a	0.580918	0.579979	ARC
Cdh10	0.581858	0.5781	ARC
Auts2	0.582797	0.533	ARC
Plscr4	0.583737	0.482264	ARC
Srgap1	0.586556	0.521726	ARC
Dab2	0.587495	0.501995	ARC
Kif1b	0.588435	0.600649	ARC
Dcaf6	0.589374	0.49072	ARC
Nptn	0.590314	0.481324	ARC
Lgmn	0.591254	0.553671	ARC
Pcdh9	0.592193	0.604408	ARC
Atxn1	0.593133	0.582797	ARC
Tmem241	0.594072	0.422132	ARC
Zfp207	0.595012	0.42589	ARC
Grin2b	0.596891	0.462533	ARC
Spon1	0.597831	0.53394	ARC
Mib1	0.59877	0.525484	ARC
Cs	0.59971	0.499176	ARC
Stox2	0.601589	0.573402	ARC
mt-Co3	0.604408	0.576221	ARC
Rims2	0.605347	0.517028	ARC
Arglu1	0.606287	0.535819	ARC
Ddx17	0.607226	0.57716	ARC
Mapk10	0.609105	0.545215	ARC
Oxr1	0.610045	0.552731	ARC
Fam228b	0.610984	0.551792	ARC
Trps1	0.611924	0.597831	ARC
Sh3gl2	0.612864	0.502934	ARC
Cit	0.614743	0.4475	ARC
Atp1b2	5.03467e-08	3.45055e-05	LHA
Trpm3	4.0233e-07	2.24357e-05	LHA
Shisa6	6.22142e-06	3.09953e-07	LHA
B230323A14Rik	1.89792e-05	1.80437e-05	LHA
Hes5	0.000172725	0.000988677	LHA
Gria1	0.000172725	0.000461448	LHA
Luzp2	0.00059769	0.00256083	LHA
Ptchd4	0.000781968	0.000172725	LHA
Mt2	0.00110043	0.00181686	LHA
Mt1	0.00117773	0.00972748	LHA
mt-Nd4	0.00210187	0.0130313	LHA
Plcb1	0.00245558	0.00512922	LHA
St3gal4	0.00371586	0.00409871	LHA
Lgi1	0.00512922	0.00484417	LHA
Aldh1a1	0.00722945	0.00159217	LHA
Map2k1	0.00747119	0.00783381	LHA
Fth1	0.0078125	0.0737576	LHA
Aff3	0.0078125	0.0156135	LHA
Camk2n1	0.00795468	0.00686683	LHA
Gpr37l1	0.00912311	0.0106542	LHA
Spire1	0.0106139	0.0121852	LHA
Tprkb	0.0116211	0.0115003	LHA
Aplp1	0.0121046	0.013958	LHA
Srgap1	0.0122255	0.00815614	LHA
Sgip1	0.0132731	0.00928428	LHA
Dpf3	0.0140386	0.0143609	LHA
Kcnip4	0.0146027	0.00992893	LHA
Dcc	0.0156135	0.0234032	LHA
Atp1a2	0.0195098	0.140856	LHA
Myorg	0.0234032	0.0311813	LHA
Dynll1	0.0272937	0.0311813	LHA
Nrarp	0.0311813	0.0467035	LHA
H3f3b	0.0350661	0.0505769	LHA
Lnpep	0.0350661	0.0350661	LHA
Slc6a11	0.0428272	0.154201	LHA
2810459M11Rik	0.0467035	0.0078125	LHA
Ttc3	0.0467035	0.0766481	LHA
Ntm	0.0467035	0.211133	LHA
Prkca	0.0544474	0.00390768	LHA
Aqp4	0.0544474	0.0389481	LHA
Zfpm2	0.0583151	0.0117145	LHA
Lsamp	0.0583151	0.358502	LHA
Prkd1	0.06218	0.0583151	LHA
Arpp21	0.066042	0.0737576	LHA
mt-Co3	0.066042	0.0939612	LHA
Adgrl1	0.0699012	0.0389481	LHA
Mdga2	0.0699012	0.175125	LHA
Fnbp1	0.0737576	0.0428272	LHA
Gfap	0.0737576	0.0117145	LHA
Ctdspl	0.0766481	0.0467035	LHA
Id2	0.0766481	0.0311813	LHA
Gabrb1	0.0795371	0.0272937	LHA
Prkg1	0.0824248	0.0910792	LHA
Pcdh11x	0.085311	0.0824248	LHA
Gpc5	0.0881958	0.24697	LHA
mt-Atp6	0.0881958	0.102599	LHA
mt-Atp8	0.0910792	0.0078125	LHA
Mapk4	0.0939612	0.0795371	LHA
Dennd6a	0.0968417	0.06218	LHA
2610316D01Rik	0.0997209	0.0795371	LHA
Prex2	0.102599	0.0389481	LHA
Klc1	0.105475	0.0939612	LHA
Immp1l	0.10835	0.0968417	LHA
Selenop	0.110266	0.148484	LHA
Fry	0.116011	0.188411	LHA
mt-Co2	0.121751	0.110266	LHA
Nebl	0.123664	0.119838	LHA
Kcnd2	0.123664	0.26764	LHA
Fabp7	0.125576	0.085311	LHA
Slc1a2	0.137039	0.449352	LHA
mt-Nd2	0.137039	0.138947	LHA
Per3	0.140856	0.0505769	LHA
mt-Nd1	0.142764	0.123664	LHA
Msi2	0.146578	0.222468	LHA
Aldoc	0.148484	0.13322	LHA
Tril	0.15039	0.112181	LHA
mt-Cytb	0.156106	0.159913	LHA
mt-Co1	0.161816	0.117925	LHA
Rgs6	0.163719	0.114096	LHA
Jak1	0.167523	0.241323	LHA
Gm12239	0.169424	0.0737576	LHA
Ttyh2	0.171325	0.231901	LHA
Gm9925	0.175125	0.135129	LHA
Gabbr1	0.177025	0.269516	LHA
Pitpnc1	0.180822	0.19978	LHA
Gm6145	0.18272	0.169424	LHA
mt-Nd3	0.184617	0.167523	LHA
Rora	0.188411	0.382853	LHA
Sorbs1	0.190307	0.207351	LHA
Atp6v0c	0.190307	0.224356	LHA
Rsbn1l	0.192203	0.231901	LHA
Ldlr	0.194098	0.161816	LHA
Farp1	0.195992	0.146578	LHA
Epdr1	0.197887	0.165621	LHA
Sfrp5	0.201674	0.10835	LHA
Slc6a9	0.207351	0.173225	LHA
Slc41a1	0.209242	0.175125	LHA
Large1	0.211133	0.235671	LHA
Magi2	0.213023	0.330404	LHA
Fgf1	0.213023	0.226243	LHA
Mt3	0.216803	0.127487	LHA
Etnppl	0.218692	0.0997209	LHA
Tmed10	0.22058	0.254493	LHA
Gm40578	0.224356	0.184617	LHA
Lfng	0.224356	0.190307	LHA
Cyp2j9	0.226243	0.446542	LHA
Cdh20	0.226243	0.233787	LHA
Hivep3	0.22813	0.211133	LHA
Itpkb	0.230016	0.177025	LHA
Mgat4c	0.231901	0.216803	LHA
Htra1	0.233787	0.280764	LHA
Ptprd	0.235671	0.167523	LHA
Cbs	0.235671	0.205459	LHA
Pde7b	0.237556	0.299496	LHA
Macf1	0.243206	0.388473	LHA
Smox	0.243206	0.209242	LHA
Cs	0.245088	0.186514	LHA
Chd9	0.248852	0.263886	LHA
Map2k6	0.248852	0.248852	LHA
Plce1	0.254493	0.15801	LHA
Plcb4	0.258252	0.291067	LHA
Cpped1	0.258252	0.230016	LHA
Fgd6	0.26013	0.250732	LHA
Ablim1	0.262008	0.352882	LHA
Dtna	0.265763	0.340706	LHA
Mapt	0.26764	0.230016	LHA
Tmc7	0.26764	0.194098	LHA
Xrn2	0.271392	0.26013	LHA
Sdc4	0.273267	0.241323	LHA
Gstm1	0.273267	0.197887	LHA
Snrnp70	0.275142	0.410951	LHA
Ank	0.277017	0.263886	LHA
Gabra2	0.278891	0.184617	LHA
9330159F19Rik	0.280764	0.22813	LHA
Gramd1b	0.280764	0.243206	LHA
Dmd	0.282637	0.373487	LHA
Lrig1	0.28451	0.304179	LHA
Phkg1	0.28732	0.205459	LHA
Cd27	0.288257	0.137039	LHA
Gm20713	0.29013	0.178924	LHA
Pik3r1	0.292003	0.362248	LHA
Nav3	0.294813	0.152296	LHA
Csgalnact1	0.29575	0.322911	LHA
Sat1	0.300433	0.258252	LHA
Syne1	0.302306	0.338833	LHA
5031439G07Rik	0.306989	0.271392	LHA
Carmil1	0.307925	0.33134	LHA
Vcl	0.308862	0.28732	LHA
Lrrc4c	0.310735	0.458718	LHA
Rpl29	0.312608	0.306989	LHA
Ddhd1	0.316355	0.395029	LHA
Lrmda	0.319165	0.194098	LHA
Cxcl14	0.321038	0.296686	LHA
Ccdc141	0.321974	0.316355	LHA
Asap1	0.322911	0.439049	LHA
Cadm1	0.325721	0.252613	LHA
Adk	0.328531	0.321974	LHA
Kansl1	0.329467	0.312608	LHA
Acsl3	0.332277	0.315418	LHA
Cit	0.33415	0.29294	LHA
Negr1	0.336023	0.410015	LHA
Gjb6	0.338833	0.302306	LHA
Acss2	0.34258	0.305116	LHA
Utrn	0.343516	0.37817	LHA
Vti1a	0.345389	0.275142	LHA
Clasp2	0.347263	0.333214	LHA
Cd47	0.349136	0.350072	LHA
Megf9	0.351009	0.308862	LHA
Fat3	0.352882	0.398776	LHA
Dalrd3	0.353819	0.323848	LHA
AI480526	0.354755	0.351009	LHA
Tmem164	0.357565	0.369741	LHA
Fam20a	0.360375	0.393156	LHA
Cntn1	0.363185	0.286384	LHA
Mical2	0.365995	0.365058	LHA
Mbnl1	0.366931	0.298559	LHA
Appl2	0.368804	0.33696	LHA
Sema4b	0.369741	0.277017	LHA
F3	0.371614	0.366931	LHA
Klf12	0.373487	0.400649	LHA
Mbd5	0.374424	0.374424	LHA
Nav2	0.375361	0.416571	LHA
Fhit	0.37817	0.325721	LHA
Kcnn2	0.380044	0.327594	LHA
Ddo	0.381917	0.335087	LHA
Itih3	0.384727	0.281701	LHA
Mro	0.3866	0.34258	LHA
Hepacam	0.387536	0.445606	LHA
Bicral	0.388473	0.353819	LHA
Gprc5b	0.390346	0.415634	LHA
Tmtc2	0.393156	0.348199	LHA
Syn2	0.394093	0.343516	LHA
Dlg2	0.395966	0.283574	LHA
Stag1	0.397839	0.390346	LHA
Thrb	0.401585	0.469021	LHA
Tra2a	0.402522	0.443732	LHA
Zhx3	0.403459	0.406268	LHA
Paqr6	0.405332	0.425	LHA
Ppm1e	0.406268	0.439986	LHA
Srsf2	0.408142	0.460591	LHA
A330076C08Rik	0.415634	0.380044	LHA
Asic2	0.417508	0.405332	LHA
Abcd2	0.419381	0.451225	LHA
Lhfp	0.420317	0.425937	LHA
Abhd14b	0.423127	0.403459	LHA
Slitrk2	0.424064	0.297623	LHA
D030047H15Rik	0.425937	0.294813	LHA
Cep85l	0.428747	0.442796	LHA
Mir100hg	0.431557	0.422191	LHA
Usp53	0.43343	0.408142	LHA
Tcf7l2	0.434366	0.413761	LHA
Grin2b	0.43624	0.371614	LHA
mt-Nd5	0.440923	0.428747	LHA
Ivd	0.443732	0.456845	LHA
Tulp3	0.444669	0.411888	LHA
Rmdn1	0.445606	0.429683	LHA
Fxyd1	0.446542	0.467147	LHA
Tmcc3	0.449352	0.385663	LHA
Phka1	0.452162	0.466211	LHA
Daam2	0.454035	0.462464	LHA
Tpcn1	0.454972	0.423127	LHA
Car10	0.458718	0.419381	LHA
Galnt18	0.459655	0.444669	LHA
Gpld1	0.462464	0.435303	LHA
Slc7a11	0.465274	0.438113	LHA
Nkx6-2	0.467147	0.310735	LHA
Ndufa3	1.16551e-05	0.00126228	MnPO
Mt1	2.28919e-05	0.000115701	MnPO
Itih3	0.000142795	0.00279186	MnPO
Mt3	0.000461448	9.42778e-05	MnPO
Rps27	0.000627467	0.0376887	MnPO
Rpl41	0.00227747	0.0353529	MnPO
Clstn1	0.0036851	0.00791471	MnPO
mt-Atp6	0.00390768	0.00390768	MnPO
Snrpn	0.00390768	0.0586427	MnPO
Gprc5b	0.00429482	0.0145365	MnPO
Rpl37	0.00463246	0.0207664	MnPO
Fau	0.00571913	0.0680508	MnPO
Rps28	0.00733942	0.0063705	MnPO
mt-Co1	0.0078125	0.0195098	MnPO
mt-Nd4l	0.0078125	0.0505769	MnPO
Matk	0.0078125	1	MnPO
Rps29	0.0085279	0.0583151	MnPO
Gabrb1	0.0085279	0.0131735	MnPO
Gpld1	0.00899583	0.0159644	MnPO
mt-Nd4	0.00947586	0.00335592	MnPO
Bsg	0.0106429	0.00252845	MnPO
Rps23	0.010815	0.092558	MnPO
mt-Cytb	0.0117145	0.00623751	MnPO
Gm32509	0.0117145	0.499619	MnPO
Cox8a	0.0120569	0.0281967	MnPO
Cntn1	0.0122397	0.000870416	MnPO
Slc1a2	0.0141404	0.0106429	MnPO
mt-Nd2	0.0147365	0.0137497	MnPO
Enho	0.0149379	0.0199955	MnPO
Rpl31	0.0151405	0.00650485	MnPO
Rpl38	0.0153445	0.0252856	MnPO
Rplp1	0.0155498	0.00837462	MnPO
Zwint	0.0156135	0.78181	MnPO
Chchd10	0.0159644	0.0115167	MnPO
Rps27a	0.0186354	0.0891546	MnPO
Scd2	0.0195098	0.066042	MnPO
Lta4h	0.0195098	0.0234032	MnPO
Grin1	0.0195098	0.658827	MnPO
Rpl35	0.0231447	0.0518878	MnPO
Cops9	0.0233068	0.0913822	MnPO
Itgb3bp	0.0234032	0.0195098	MnPO
Cdh18	0.0234032	0.0737576	MnPO
Sparc	0.0272937	0.0174569	MnPO
Dlgap2	0.0272937	0.192952	MnPO
Eef2	0.0273274	0.0496439	MnPO
Fam107a	0.0285475	0.00534463	MnPO
Ndrg2	0.0311813	0.0711531	MnPO
Pclo	0.0311813	0.0737576	MnPO
Cox6a1	0.0311813	0.494248	MnPO
A230006K03Rik	0.0311813	0.113126	MnPO
Ntsr2	0.0342086	0.0703716	MnPO
Tenm2	0.0350661	0.0078125	MnPO
Rps18	0.0357378	0.0949306	MnPO
Ptch1	0.0384813	0.0665233	MnPO
Dpp10	0.0389481	0.0311813	MnPO
mt-Co2	0.0423417	0.0192355	MnPO
Fmn2	0.0428272	0.644825	MnPO
Gap43	0.0428272	0.540658	MnPO
Serf2	0.0467035	0.101632	MnPO
Ier2	0.0467035	0.0156135	MnPO
Snap25	0.0467035	0.404096	MnPO
Tmem164	0.0467921	0.0544474	MnPO
Selenop	0.0472261	0.0283719	MnPO
Mlc1	0.0505769	0.0929968	MnPO
Vat1l	0.0505769	1	MnPO
Snhg14	0.0521146	0.0650116	MnPO
Rpl13	0.0544474	0.212736	MnPO
Ryr2	0.0544474	0.321708	MnPO
Mir100hg	0.056507	0.0775465	MnPO
Rpl8	0.0583151	0.313401	MnPO
Itsn2	0.0583151	0.0428272	MnPO
Sdc4	0.0583151	0.406821	MnPO
Scg2	0.0583151	0.768068	MnPO
Cntnap5a	0.06218	0.136046	MnPO
Oxr1	0.066042	0.0929968	MnPO
Vsnl1	0.066042	0.456538	MnPO
Ddhd1	0.0699012	0.066042	MnPO
Faim2	0.0699012	1	MnPO
Dlg2	0.0722011	0.0327075	MnPO
Atp1a3	0.0737576	0.504986	MnPO
Atp6v1b2	0.0759245	0.267741	MnPO
Itm2c	0.0776111	0.360311	MnPO
Gm26871	0.0776111	0.147472	MnPO
Agt	0.0814618	0.0853096	MnPO
Nebl	0.0814618	0.395913	MnPO
Brinp1	0.0814618	0.365803	MnPO
mt-Nd1	0.0841919	0.0117145	MnPO
Tcf12	0.0853096	0.0699012	MnPO
Cacna1e	0.0853096	0.229639	MnPO
Aplp1	0.0858926	0.1558	MnPO
Ndufc1	0.0891546	0.167414	MnPO
Ube2r2	0.0891546	0.0467035	MnPO
Gm20642	0.0891546	0.277258	MnPO
Rtn3	0.0929968	0.235262	MnPO
Zfr	0.0929968	0.0389481	MnPO
Plcb1	0.0929968	0.181616	MnPO
Pacsin1	0.0929968	0.537099	MnPO
Peg3	0.0934445	0.0593625	MnPO
Rtn1	0.0949306	0.0078125	MnPO
Lingo2	0.0958766	0.0234032	MnPO
Tmx4	0.0982387	0.0858926	MnPO
Rnf165	0.098755	1	MnPO
Gprasp1	0.0991501	0.0867489	MnPO
mt-Co3	0.100371	0.0234032	MnPO
Ttyh1	0.101632	0.115996	MnPO
Lrfn5	0.101632	0.107382	MnPO
Gm45323	0.104508	1	MnPO
Tmbim6	0.107382	0.198611	MnPO
Fbxl17	0.107382	0.914259	MnPO
Cntnap2	0.107382	0.00390768	MnPO
Rpl37a	0.110255	0.127462	MnPO
Ly6h	0.110255	0.712807	MnPO
Psap	0.113126	0.349309	MnPO
Gabrb2	0.113126	0.305081	MnPO
Atp5k	0.115996	0.324475	MnPO
Rgs6	0.115996	0.066042	MnPO
Cntnap5b	0.115996	0.291187	MnPO
Rbfox3	0.118865	0.761186	MnPO
Lamp1	0.121732	0.204265	MnPO
Ppfia2	0.121732	0.246492	MnPO
Nmnat2	0.123618	0.0719385	MnPO
Gm48091	0.124597	1	MnPO
2310022B05Rik	0.127462	0.412267	MnPO
mt-Nd5	0.127462	0.164569	MnPO
Arfgef3	0.127462	0.778377	MnPO
Pafah1b1	0.130325	0.316172	MnPO
Celf4	0.130325	0.164569	MnPO
Grb10	0.133186	0.894063	MnPO
Acsl3	0.136046	0.32724	MnPO
A330102I10Rik	0.136046	0.942757	MnPO
Gm30003	0.138905	1	MnPO
Psd2	0.13994	0.209999	MnPO
Scg3	0.141762	0.195782	MnPO
Abr	0.141762	0.470928	MnPO
Syn1	0.141762	1	MnPO
Rab27b	0.144618	1	MnPO
Nsf	0.146407	0.245568	MnPO
App	0.147331	0.0440143	MnPO
Dbi	0.147472	0.138905	MnPO
Pgm2l1	0.147472	1	MnPO
Ubb	0.150325	0.246492	MnPO
Pitpnc1	0.150325	0.0776111	MnPO
Kif5a	0.150325	1	MnPO
Spop	0.150718	0.174739	MnPO
Kcnip4	0.152874	0.0417216	MnPO
Ywhae	0.153177	0.321708	MnPO
Galnt13	0.153177	0.150325	MnPO
Epb41l3	0.156027	0.579686	MnPO
Cpe	0.158876	0.147472	MnPO
Kif5c	0.158876	0.634305	MnPO
Adcyap1r1	0.161723	0.19012	MnPO
Rpl21	0.161723	0.540658	MnPO
Elavl2	0.161723	0.417707	MnPO
Saraf	0.161805	0.160265	MnPO
Rac1	0.162421	0.0994548	MnPO
Pea15a	0.164569	0.0814618	MnPO
Gm10684	0.164569	1	MnPO
Reep1	0.167414	0.538879	MnPO
Tafa1	0.169965	0.169965	MnPO
Nrxn3	0.170257	0.0151405	MnPO
A830018L16Rik	0.170257	0.718008	MnPO
Lsm6	0.173099	0.376772	MnPO
Trpm3	0.173099	0.124597	MnPO
Ksr2	0.173099	0.492457	MnPO
Serinc1	0.175939	0.365803	MnPO
Nrg3	0.175939	0.0156135	MnPO
D8Ertd738e	0.178778	0.187286	MnPO
Tenm1	0.178778	0.243687	MnPO
Chpt1	0.181616	0.307856	MnPO
Chd9	0.181616	0.726666	MnPO
Gm48749	0.181616	1	MnPO
Coa3	0.184452	0.121732	MnPO
Rab3c	0.184452	0.324475	MnPO
Megf9	0.186441	0.230632	MnPO
Epha6	0.187286	0.153177	MnPO
Micos13	0.19012	0.368548	MnPO
Cadm1	0.19012	0.0958766	MnPO
Ano4	0.19012	0.984425	MnPO
Lrp1	0.192952	0.263294	MnPO
Clstn2	0.192952	0.268884	MnPO
Arhgap5	0.195782	0.384984	MnPO
Gm40841	0.195782	1	MnPO
Car10	0.196141	0.0305082	MnPO
Jag2	0.198611	1	MnPO
Atp6v0a1	0.200299	0.191214	MnPO
1810037I17Rik	0.201439	0.425856	MnPO
Rpl26	0.201439	0.460138	MnPO
Gabrg2	0.201439	0.883941	MnPO
Cox7c	0.204265	0.288404	MnPO
Fam135b	0.204265	1	MnPO
Pygb	0.20709	0.346555	MnPO
Nxph1	0.20709	0.06218	MnPO
Tmem47	0.209914	0.226825	MnPO
Adk	0.209914	0.78524	MnPO
Snhg11	0.209914	0.0117145	MnPO
Rit2	0.212736	0.614974	MnPO
Dscam	0.215557	0.130325	MnPO
Ttc3	0.216928	0.0500892	MnPO
Ncald	0.218376	0.797234	MnPO
Rps19	0.221194	0.141762	MnPO
Sidt1	0.221194	1	MnPO
Klf9	0.22401	0.376772	MnPO
Spock1	0.22401	0.249296	MnPO
Gm6145	0.226825	0.299528	MnPO
Rasgef1b	0.226825	0.843286	MnPO
Fstl5	0.229639	0.293969	MnPO
Atp8a2	0.232451	0.646577	MnPO
Selenok	0.235262	0.439412	MnPO
Gria1	0.235262	0.136046	MnPO
Snap91	0.235262	0.512135	MnPO
Nfic	0.235559	0.227399	MnPO
Asic2	0.236329	0.0206113	MnPO
Clvs1	0.238072	0.834783	MnPO
Bmt2	0.239255	0.0896316	MnPO
Ckb	0.24088	0.178778	MnPO
Synpr	0.24088	1	MnPO
Ncan	0.243687	0.183977	MnPO
Gpr37l1	0.243687	0.658827	MnPO
Kcnq2	0.243687	1	MnPO
Aopep	0.245414	0.0593625	MnPO
Ubc	0.246492	0.382248	MnPO
Nexmif	0.246492	0.695442	MnPO
Mtus2	0.249296	0.686743	MnPO
Smyd3	0.249879	0.0761937	MnPO
Pkm	0.252098	0.40137	MnPO
Gjb6	0.252098	0.483495	MnPO
Mir124a-1hg	0.252098	1	MnPO
Sdc3	0.254345	0.161723	MnPO
Syt1	0.2549	0.0776111	MnPO
Pik3r1	0.2565	0.210307	MnPO
Phpt1	0.257699	0.232451	MnPO
Hecw1	0.257699	0.609693	MnPO
Fam20a	0.259888	0.037295	MnPO
Mir9-3hg	0.260498	0.374032	MnPO
Epha10	0.260498	1	MnPO
Tom1l2	0.26112	0.274516	MnPO
Cep85l	0.263294	0.678032	MnPO
6330411D24Rik	0.263294	0.672799	MnPO
Dnm1	0.26609	1	MnPO
Ptprr	0.268884	0.529976	MnPO
Lgi1	0.271677	0.451134	MnPO
Rbfox1	0.271677	0.0195098	MnPO
Fam193a	0.273592	0.136552	MnPO
Mlf2	0.274468	0.110255	MnPO
Cox6b1	0.274468	0.969458	MnPO
Erc2	0.274468	0.184452	MnPO
Atp5g2	0.277258	0.271677	MnPO
Rps15	0.277258	0.288404	MnPO
Hs6st2	0.277258	0.592058	MnPO
Thrb	0.277287	0.233866	MnPO
B3galt2	0.279289	0.207536	MnPO
Cmip	0.279751	0.1113	MnPO
Adgrb1	0.280047	0.436704	MnPO
Fgfr3	0.280047	0.904169	MnPO
Zcchc18	0.280047	0.707603	MnPO
Hmgcs1	0.282834	0.0505769	MnPO
Minar2	0.282834	1	MnPO
Agbl4	0.284524	0.119461	MnPO
Actb	0.28562	0.218376	MnPO
Plppr1	0.28562	0.665817	MnPO
Gpd2	0.286526	0.0662703	MnPO
Elavl3	0.288404	1	MnPO
Lrrc8a	0.289605	0.0708921	MnPO
Prdx2	0.291187	0.291187	MnPO
Prex2	0.291187	0.218376	MnPO
Rims1	0.291187	0.141762	MnPO
Gnai2	0.293969	0.156027	MnPO
Rapgef5	0.293969	1	MnPO
Slc4a10	0.296749	0.833081	MnPO
Paqr7	0.299528	0.37129	MnPO
Farp1	0.299528	0.443923	MnPO
Gm13629	0.299528	0.949443	MnPO
S100a1	0.302305	0.390451	MnPO
Nrg3os	0.302305	0.263294	MnPO
Ryr3	0.305081	0.735313	MnPO
Agpat3	0.307856	0.28562	MnPO
Baiap3	0.307856	0.56552	MnPO
Fads1	0.310629	0.318941	MnPO
Grm5	0.310629	0.115996	MnPO
Bend6	0.313401	1	MnPO
Pebp1	0.316172	0.238072	MnPO
Tomm7	0.318941	0.296749	MnPO
Tro	0.318941	1	MnPO
Selenot	0.321708	0.124597	MnPO
Slc2a3	0.321708	1	MnPO
Hsd17b12	0.324475	0.173099	MnPO
Paqr8	0.324475	0.547771	MnPO
Ier3ip1	0.324475	1	MnPO
Tmem229a	0.32724	0.32724	MnPO
Lin28b	0.32724	1	MnPO
Scd1	0.330003	0.0389481	MnPO
Mt2	0.330003	0.0853096	MnPO
Elavl4	0.330003	1	MnPO
Phgdh	0.332765	0.417707	MnPO
Chgb	0.332765	1	MnPO
Rps3a1	0.335526	0.243687	MnPO
Cx3cl1	0.335526	1	MnPO
Paqr6	0.338286	0.136046	MnPO
Tsc22d3	0.338286	0.848382	MnPO
Opcml	0.338286	0.0958766	MnPO
Glul	0.341044	0.249296	MnPO
Rcan2	0.341044	1	MnPO
Nipbl	0.3438	0.338286	MnPO
Zmat4	0.3438	0.376772	MnPO
Ciapin1	0.346555	0.0350661	MnPO
Spock2	0.346555	1	MnPO
Srrm3	0.349309	1	MnPO
D430041D05Rik	0.352062	0.931038	MnPO
5031439G07Rik	0.354813	0.282834	MnPO
Svop	0.354813	1	MnPO
Prxl2a	0.357563	0.22401	MnPO
Evl	0.357563	1	MnPO
Mapk4	0.360311	0.814329	MnPO
Frmd5	0.360311	0.271677	MnPO
Appl2	0.363058	0.229639	MnPO
Camk2b	0.363058	1	MnPO
Tnik	0.365803	1	MnPO
Disp2	0.365803	1	MnPO
Tpt1	0.368548	0.2549	MnPO
Selenow	0.368548	0.567292	MnPO
Epb41l1	0.368548	0.773224	MnPO
Dgkg	0.37129	1	MnPO
Rpl32	0.374032	0.153177	MnPO
Lama2	0.374032	0.487081	MnPO
Gabra1	0.374032	1	MnPO
Npc2	0.376772	0.310629	MnPO
Rps2	0.376772	0.252098	MnPO
Myt1l	0.376772	0.313401	MnPO
Prnp	0.37951	0.341044	MnPO
Adarb1	0.37951	1	MnPO
Mrpl42	0.382248	0.393183	MnPO
Mblac2	0.382248	1	MnPO
Nt5c2	0.384984	0.293969	MnPO
S1pr1	0.384984	0.77666	MnPO
Galnt17	0.384984	0.730126	MnPO
Zcchc24	0.387718	0.260498	MnPO
Nell1	0.387718	0.288404	MnPO
Mmp14	0.390451	0.442119	MnPO
Lrrtm4	0.390451	0.0272937	MnPO
Pcsk2	0.393183	0.487081	MnPO
Epas1	0.395913	0.409544	MnPO
5530401A14Rik	0.395913	1	MnPO
Sptbn4	0.398642	1	MnPO
Cnp	0.40137	0.118865	MnPO
Ank3	0.40137	0.0505769	MnPO
Cntnap4	0.404096	0.569064	MnPO
Gnb1	0.406821	0.305081	MnPO
Syt16	0.406821	0.554876	MnPO
Atp6v0c	0.412267	0.293969	MnPO
Serpini1	0.412267	1	MnPO
Clmp	0.414987	1	MnPO
Fam169a	0.417707	1	MnPO
Tuba1a	0.420425	0.130325	MnPO
Spock3	0.420425	0.252098	MnPO
Klhl5	0.423141	0.209914	MnPO
Shank1	0.423141	1	MnPO
Tmeff2	0.425856	1	MnPO
Padi2	0.42857	0.252098	MnPO
Phka1	0.42857	0.521061	MnPO
Osbp2	0.42857	1	MnPO
Ahcyl1	0.431283	0.650079	MnPO
Tmem130	0.431283	1	MnPO
Tmsb4x	0.433994	0.332765	MnPO
Rpsa	0.433994	0.150325	MnPO
Gria3	0.433994	0.341044	MnPO
Slc6a11	0.436704	0.431283	MnPO
Rpl35a	0.436704	0.365803	MnPO
Scg5	0.436704	1	MnPO
Rpl17	0.439412	0.549548	MnPO
Cntn5	0.439412	0.0350661	MnPO
Gfap	0.442119	0.184452	MnPO
Mcc	0.442119	0.917619	MnPO
Ephb1	0.442119	1	MnPO
Rps21	0.443923	0.310629	MnPO
Cobl	0.443923	1	MnPO
Frmpd4	0.445726	0.218376	MnPO
Lrrc3b	0.44753	1	MnPO
Plce1	0.449332	0.671054	MnPO
Lhfpl3	0.449332	1	MnPO
Gm13052	0.451134	1	MnPO
Tbc1d9b	0.452936	1	MnPO
Basp1	0.454737	0.723204	MnPO
Phkg1	0.456538	0.829676	MnPO
Arhgap20	0.456538	1	MnPO
Rps25	0.458338	0.63255	MnPO
Miat	0.458338	1	MnPO
B230209E15Rik	0.460138	1	MnPO
Gm2516	0.461937	1	MnPO
St3gal4	0.463736	0.198611	MnPO
Zfp804b	0.463736	0.0891546	MnPO
Pnma3	0.465535	1	MnPO
Ahi1	0.467333	0.127462	MnPO
Camk2n1	0.46913	0.156027	MnPO
Ablim2	0.46913	1	MnPO
Rpl10	0.470928	0.648328	MnPO
Elmod1	0.470928	1	MnPO
Ttll11	0.472724	1	MnPO
mt-Nd3	0.47452	0.271677	MnPO
Jakmip3	0.47452	1	MnPO
Rpl18a	0.476316	0.821155	MnPO
Ak5	0.476316	0.851777	MnPO
Tafa2	0.478111	0.731856	MnPO
Cxcl14	0.479906	0.996041	MnPO
Gria4	0.479906	0.121732	MnPO
Ogt	0.481701	0.709338	MnPO
4930555F03Rik	0.481701	0.274468	MnPO
Clstn3	0.483495	1	MnPO
Eva1a	0.485288	0.141762	MnPO
A330008L17Rik	0.485288	0.524628	MnPO
Usp29	0.487081	0.133186	MnPO
Brinp3	0.488874	0.299528	MnPO
Edil3	0.488874	0.497829	MnPO
Acsl6	0.490666	0.398642	MnPO
Ablim3	0.490666	1	MnPO
Rps24	0.492457	0.307856	MnPO
Cacna1c	0.492457	0.221194	MnPO
Atp1b1	0.494248	0.420425	MnPO
Kcnj6	0.496039	1	MnPO
Gpc5	0.497829	0.24088	MnPO
Arhgap44	0.497829	1	MnPO
Gli3	0.499619	0.665817	MnPO
Zdhhc2	0.499619	1	MnPO
Rps11	0.501408	1	MnPO
Slc6a7	0.501408	1	MnPO
Cnnm1	0.503197	1	MnPO
Xkr4	0.504986	0.158876	MnPO
mt-Atp8	0.506774	0.104508	MnPO
Gucy1b1	0.506774	1	MnPO
Trnau1ap	0.508561	1	MnPO
Rheb	0.510348	1	MnPO
Camk2g	0.512135	0.695442	MnPO
Kctd16	0.512135	0.209914	MnPO
Slc35f4	0.513921	1	MnPO
Kif26b	0.515707	0.920976	MnPO
Ivd	0.517492	0.967792	MnPO
Resp18	0.517492	1	MnPO
Cdh12	0.519277	0.657078	MnPO
Grm1	0.521061	1	MnPO
Zim1	0.522845	1	MnPO
Cdkl1	0.524628	1	MnPO
Sat1	0.526411	0.492457	MnPO
Ptprn	0.526411	1	MnPO
Eef1a1	0.528194	0.959458	MnPO
5730522E02Rik	0.528194	1	MnPO
Itpkb	0.529976	0.880563	MnPO
Cers4	0.529976	1	MnPO
Rgs17	0.531757	0.742223	MnPO
Hdac8	0.533538	0.907534	MnPO
Ica1	0.533538	0.584991	MnPO
Rundc3b	0.535319	1	MnPO
Negr1	0.537099	0.586758	MnPO
F3	0.540658	0.65358	MnPO
Kcnq5	0.542437	0.296749	MnPO
Id2	0.545993	0.718008	MnPO
Nrg1	0.545993	0.0467035	MnPO
Nsg2	0.547771	1	MnPO
Rpl12	0.549548	0.349309	MnPO
Lingo1	0.549548	1	MnPO
Plppr4	0.551324	1	MnPO
Frmd4a	0.5531	0.716275	MnPO
Samd5	0.5531	1	MnPO
Atp5e	0.554876	1	MnPO
Khdrbs2	0.554876	0.20709	MnPO
Cacna1b	0.556651	0.506774	MnPO
Stox2	0.558426	1	MnPO
Cdh8	0.558426	0.318941	MnPO
Dnajc6	0.5602	0.390451	MnPO
Shank2	0.561974	1	MnPO
Vps29	0.563747	1	MnPO
Tmtc2	0.56552	0.790383	MnPO
Slc24a5	0.56552	1	MnPO
Rpl23a	0.567292	0.590292	MnPO
Epb41l4b	0.567292	0.951113	MnPO
Smox	0.569064	1	MnPO
Slc12a5	0.569064	1	MnPO
Ghr	0.570836	1	MnPO
Syt7	0.570836	1	MnPO
Cacna1g	0.572607	1	MnPO
Calm3	0.574377	0.834783	MnPO
Fkbp1a	0.574377	1	MnPO
Mertk	0.576147	0.816036	MnPO
Dync1i1	0.576147	0.556651	MnPO
Tjp1	0.577917	0.85008	MnPO
Atg4b	0.577917	1	MnPO
Prodh	0.579686	1	MnPO
Slc24a2	0.579686	0.338286	MnPO
Fry	0.583223	1	MnPO
Pakap	0.584991	0.65358	MnPO
Usp53	0.586758	0.338286	MnPO
Tspan13	0.586758	1	MnPO
Rasgrf2	0.588525	0.838186	MnPO
Cadps	0.590292	0.170257	MnPO
Mdga2	0.592058	0.563747	MnPO
Iqsec3	0.592058	1	MnPO
Rps16	0.593823	0.997699	MnPO
Mfn1	0.597353	0.766348	MnPO
Kcnb2	0.597353	0.19012	MnPO
Wasf3	0.599117	0.939411	MnPO
Rab6b	0.599117	1	MnPO
Gm28905	0.600881	1	MnPO
D130043K22Rik	0.602644	1	MnPO
Gm17188	0.604407	1	MnPO
Cables1	0.606169	0.915939	MnPO
Scn3a	0.606169	1	MnPO
Csrp1	0.607931	0.305081	MnPO
Dach1	0.607931	1	MnPO
Rpl39	0.609693	0.604407	MnPO
Cacna1i	0.609693	1	MnPO
Prkar1b	0.611454	1	MnPO
Ppp3r1	0.613214	1	MnPO
Pdcd7	0.614974	1	MnPO
Rps26	0.616734	0.824564	MnPO
Ptpn2	0.616734	1	MnPO
Prkar2b	0.618493	1	MnPO
Slc22a17	0.620252	1	MnPO
Grm7	0.62201	0.0814618	MnPO
Shtn1	0.623768	0.910898	MnPO
Slit3	0.625525	0.994383	MnPO
Slit2	0.627282	0.97944	MnPO
Slc16a11	0.627282	1	MnPO
Caly	0.629038	1	MnPO
Tmem63c	0.630794	1	MnPO
Cntn6	0.63255	0.86534	MnPO
Eno1	0.634305	0.895749	MnPO
Tmem91	0.634305	1	MnPO
Flywch1	0.636059	1	MnPO
Rpl29	0.637813	0.47452	MnPO
1700025G04Rik	0.637813	1	MnPO
Pkia	0.639567	1	MnPO
Adgrl2	0.64132	0.5531	MnPO
Mical2	0.643073	1	MnPO
Podxl2	0.643073	1	MnPO
Kcnt2	0.644825	1	MnPO
Atp1b2	0.646577	0.510348	MnPO
Prepl	0.646577	1	MnPO
Acot11	0.648328	0.688483	MnPO
Smarca1	0.648328	1	MnPO
Zcchc12	0.650079	1	MnPO
Cd47	0.65183	0.533538	MnPO
Ube3a	0.65183	0.110255	MnPO
Unc13a	0.65358	1	MnPO
Aifm3	0.655329	1	MnPO
Pak3	0.655329	0.563747	MnPO
Prdx6	0.657078	0.831379	MnPO
Camk2a	0.657078	1	MnPO
Trpc5	0.658827	1	MnPO
Nr3c2	0.660575	0.855171	MnPO
Cntn4	0.660575	0.22401	MnPO
Nkain3	0.662323	0.409544	MnPO
Ppargc1a	0.66407	0.583223	MnPO
Rapgef4	0.66407	0.433994	MnPO
Slco1c1	0.665817	1	MnPO
Timp2	0.665817	0.795522	MnPO
Scn2a	0.667563	0.533538	MnPO
Myh10	0.669309	1	MnPO
Etnppl	0.671054	0.374032	MnPO
Cadm3	0.671054	1	MnPO
Gpi1	0.672799	1	MnPO
Uba52	0.674544	0.743949	MnPO
Srrm4	0.674544	0.959458	MnPO
Mast4	0.676288	0.702394	MnPO
Cacnb4	0.676288	0.676288	MnPO
Cdc73	0.678032	0.961126	MnPO
Lrrtm3	0.678032	0.470928	MnPO
Camta1	0.679775	0.478111	MnPO
Htr2c	0.679775	0.161723	MnPO
Ndufa12	0.681517	0.839886	MnPO
Mok	0.681517	1	MnPO
Rpl36a	0.68326	0.999356	MnPO
Parm1	0.68326	1	MnPO
Elmo2	0.685001	0.82286	MnPO
Celf5	0.685001	1	MnPO
Fbxl2	0.686743	1	MnPO
Cd38	0.688483	0.496039	MnPO
Csmd1	0.688483	0.098755	MnPO
Kcnip1	0.690224	0.827972	MnPO
Kcnk1	0.691964	0.420425	MnPO
Slc6a17	0.691964	1	MnPO
Gabrb3	0.693703	0.167414	MnPO
Aldh1a1	0.695442	0.0428272	MnPO
Pcdh15	0.695442	0.515707	MnPO
Oprm1	0.697181	1	MnPO
Pcsk1n	0.698919	0.0350661	MnPO
Rps12	0.700657	0.37951	MnPO
Fxyd6	0.700657	1	MnPO
Trank1	0.702394	1	MnPO
Cdh20	0.70413	0.95779	MnPO
Fem1b	0.70413	1	MnPO
Gm42067	0.705867	0.894063	MnPO
Morf4l2	0.705867	1	MnPO
Gnl3l	0.707603	1	MnPO
Pdzrn4	0.709338	0.235262	MnPO
Mfsd6	0.711073	0.96446	MnPO
Gapdh	0.712807	0.445726	MnPO
Syt4	0.712807	1	MnPO
Scn1a	0.714541	0.600881	MnPO
Camk4	0.716275	1	MnPO
Msi2	0.718008	0.902486	MnPO
Tnr	0.718008	0.382248	MnPO
Dzank1	0.71974	1	MnPO
Atp9a	0.721473	1	MnPO
Glt1d1	0.723204	1	MnPO
Fgd4	0.724935	0.931038	MnPO
Dcx	0.724935	1	MnPO
Gng2	0.726666	1	MnPO
Sgsm1	0.728397	1	MnPO
Klhl1	0.730126	1	MnPO
Gm15398	0.731856	0.363058	MnPO
Magi2	0.733585	0.42857	MnPO
Olfm3	0.733585	1	MnPO
Mycbp2	0.735313	1	MnPO
Slc8a3	0.735313	1	MnPO
Map7d2	0.737041	0.927686	MnPO
Rps20	0.738769	0.636059	MnPO
Arhgap24	0.738769	1	MnPO
Ccdc85a	0.740496	1	MnPO
Rtl4	0.740496	1	MnPO
Kirrel3	0.742223	0.56552	MnPO
Slc6a15	0.743949	1	MnPO
Daam2	0.745675	0.926009	MnPO
Gm15397	0.745675	1	MnPO
Tubb3	0.7474	1	MnPO
Eml2	0.749125	1	MnPO
Srgap1	0.750849	0.515707	MnPO
Gpr75	0.750849	1	MnPO
Inpp4a	0.752573	1	MnPO
Rps6	0.754296	0.672799	MnPO
Stmn2	0.754296	1	MnPO
Slc7a14	0.756019	1	MnPO
Scmh1	0.757742	0.984425	MnPO
Nav1	0.757742	0.745675	MnPO
Atp11c	0.759464	0.792097	MnPO
Mtss2	0.761186	0.570836	MnPO
Ptpre	0.761186	1	MnPO
P4hb	0.762907	1	MnPO
Vps50	0.762907	1	MnPO
Flvcr1	0.764628	1	MnPO
Tiam1	0.766348	1	MnPO
Pak1	0.768068	1	MnPO
Atp2b1	0.769787	0.232451	MnPO
Syngr3	0.769787	1	MnPO
Cyb5b	0.771506	0.733585	MnPO
Ank2	0.773224	0.62201	MnPO
Ralgps2	0.773224	1	MnPO
Sh3rf3	0.774942	1	MnPO
Thra	0.77666	1	MnPO
Adam23	0.77666	0.728397	MnPO
B830012L14Rik	0.778377	0.992725	MnPO
Adgrl1	0.780093	0.714541	MnPO
Abcf1	0.780093	1	MnPO
Gpr45	0.78181	1	MnPO
A530046M15Rik	0.783525	1	MnPO
Kcnj10	0.78524	0.409544	MnPO
Cct8	0.78524	1	MnPO
Ache	0.786955	1	MnPO
Scn9a	0.78867	1	MnPO
Cstf2	0.790383	1	MnPO
Rora	0.792097	0.465535	MnPO
Znrf1	0.792097	1	MnPO
Igsf9b	0.79381	1	MnPO
G3bp2	0.795522	1	MnPO
Arsb	0.797234	1	MnPO
Agl	0.798946	0.952783	MnPO
Neto2	0.798946	1	MnPO
Cnrip1	0.800657	0.919298	MnPO
Tmem234	0.802368	1	MnPO
Tprkb	0.804078	0.595588	MnPO
Ppp1r1a	0.804078	1	MnPO
Nyap2	0.805788	1	MnPO
Rap1gap	0.807497	1	MnPO
Tcp11l1	0.809206	1	MnPO
Frmd3	0.810914	1	MnPO
Dscaml1	0.812622	1	MnPO
Mgat4c	0.814329	0.554876	MnPO
Bzw1	0.814329	1	MnPO
Hcn1	0.816036	0.630794	MnPO
Arhgef28	0.817743	0.346555	MnPO
Ppp1r13b	0.817743	1	MnPO
Slc6a1	0.819449	0.927686	MnPO
Gabra3	0.819449	1	MnPO
Chga	0.821155	1	MnPO
Rpl4	0.82286	0.951113	MnPO
Plcxd3	0.82286	0.867033	MnPO
Grin2a	0.824564	0.740496	MnPO
Rmst	0.826269	0.761186	MnPO
Plekha6	0.826269	0.613214	MnPO
8030451O07Rik	0.827972	1	MnPO
Atp1a2	0.829676	0.538879	MnPO
Kctd8	0.829676	1	MnPO
Pgrmc1	0.831379	0.522845	MnPO
Chd6	0.833081	0.962793	MnPO
Atp1b3	0.833081	1	MnPO
Crim1	0.834783	0.613214	MnPO
Slc8a1	0.834783	0.201439	MnPO
Gm973	0.836485	0.506774	MnPO
Snx30	0.836485	1	MnPO
Grina	0.838186	1	MnPO
Zfp804a	0.838186	1	MnPO
Focad	0.839886	1	MnPO
Fhit	0.841586	1	MnPO
Bcas2	0.841586	1	MnPO
Slc9a7	0.843286	0.966126	MnPO
Pip5k1b	0.844985	1	MnPO
Syp	0.846684	1	MnPO
9330159F19Rik	0.848382	0.618493	MnPO
Tmem117	0.848382	1	MnPO
Rplp0	0.85008	0.768068	MnPO
Napb	0.85008	1	MnPO
Tbca	0.851777	1	MnPO
Kcnn2	0.853474	0.79381	MnPO
Rian	0.853474	0.187286	MnPO
Tubb4b	0.855171	0.838186	MnPO
Lrrc7	0.855171	0.181616	MnPO
Ank1	0.856867	1	MnPO
Camk1d	0.858562	0.721473	MnPO
Abhd2	0.858562	1	MnPO
Zfp385b	0.860257	1	MnPO
Mrtfa	0.861952	1	MnPO
Sfrp5	0.863646	0.861952	MnPO
Frmpd3	0.863646	1	MnPO
Nhs	0.86534	0.42857	MnPO
Gm45904	0.867033	1	MnPO
Nav3	0.868726	0.318941	MnPO
Dpysl5	0.868726	1	MnPO
Cbarp	0.870418	1	MnPO
Myef2	0.87211	1	MnPO
Macf1	0.873802	1	MnPO
Hlf	0.875493	0.976114	MnPO
Spcs2	0.875493	1	MnPO
Stmn3	0.877183	0.604407	MnPO
Slc4a4	0.878873	0.797234	MnPO
Chd5	0.878873	1	MnPO
Caskin1	0.880563	0.535319	MnPO
Nap1l1	0.880563	1	MnPO
Insyn2b	0.882252	1	MnPO
A330076C08Rik	0.883941	0.204265	MnPO
B230217J21Rik	0.883941	1	MnPO
Tmem196	0.885629	1	MnPO
Ddo	0.887317	0.740496	MnPO
Slc35f1	0.887317	0.384984	MnPO
Adcy5	0.889004	1	MnPO
Fgf13	0.890691	1	MnPO
Slc7a11	0.892377	0.87211	MnPO
Gm45321	0.892377	0.522845	MnPO
4933406I18Rik	0.894063	1	MnPO
Cyb5r4	0.895749	1	MnPO
Gm12239	0.897434	0.611454	MnPO
Atp2b3	0.897434	1	MnPO
Pls3	0.899118	1	MnPO
Cnksr2	0.899118	1	MnPO
6030443J06Rik	0.900803	0.750849	MnPO
Stxbp1	0.900803	1	MnPO
Rbms1	0.902486	1	MnPO
Mrpl58	0.904169	1	MnPO
Mtss1	0.905852	0.967792	MnPO
Pde10a	0.907534	0.496039	MnPO
Kcnh7	0.909216	0.260498	MnPO
Per3	0.910898	0.639567	MnPO
Unc80	0.910898	0.398642	MnPO
Scoc	0.912579	0.991066	MnPO
Aff3	0.912579	1	MnPO
Hap1	0.914259	1	MnPO
Tmod2	0.915939	0.529976	MnPO
Sms	0.915939	0.969458	MnPO
Mcf2l	0.917619	1	MnPO
Slc22a4	0.919298	0.819449	MnPO
Cdh13	0.919298	0.5602	MnPO
Ywhab	0.920976	1	MnPO
Rasgef1a	0.920976	1	MnPO
Pdss2	0.922654	1	MnPO
Dync1h1	0.924332	0.756019	MnPO
5330434G04Rik	0.924332	0.460138	MnPO
Dynll2	0.926009	0.352062	MnPO
Bc1	0.926009	1	MnPO
Hdac11	0.927686	1	MnPO
Kif1a	0.929363	0.70413	MnPO
Psmb1	0.929363	1	MnPO
Cdh19	0.931038	0.497829	MnPO
Fhod3	0.931038	0.679775	MnPO
Fstl4	0.932714	1	MnPO
Clip4	0.934389	1	MnPO
Abhd14b	0.936063	0.686743	MnPO
Fndc9	0.936063	1	MnPO
Zdbf2	0.937737	1	MnPO
Gli2	0.939411	0.942757	MnPO
Rftn1	0.939411	1	MnPO
Cds2	0.941084	0.954453	MnPO
Tmem132d	0.941084	1	MnPO
Cecr2	0.942757	0.912579	MnPO
Ndrg4	0.942757	1	MnPO
Fam117b	0.944429	1	MnPO
Adap1	0.946101	1	MnPO
Lncpint	0.947772	0.769787	MnPO
Gas5	0.947772	1	MnPO
Glrb	0.949443	0.597353	MnPO
Ptchd1	0.949443	1	MnPO
Vav3	0.951113	0.711073	MnPO
Dcaf5	0.951113	0.597353	MnPO
Pdzd4	0.952783	1	MnPO
Sgk1	0.954453	1	MnPO
Lsamp	0.956122	0.735313	MnPO
Ctnnbip1	0.956122	1	MnPO
Rps7	0.95779	0.757742	MnPO
Greb1l	0.95779	1	MnPO
Atp2b2	0.959458	0.606169	MnPO
Ttll7	0.959458	1	MnPO
Pfkp	0.961126	0.737041	MnPO
Vwc2	0.961126	1	MnPO
Ndufs5	0.962793	0.363058	MnPO
Anks1b	0.962793	0.138905	MnPO
Pcnp	0.96446	1	MnPO
Nkx6-2	0.966126	0.209914	MnPO
Atxn2l	0.966126	1	MnPO
Maob	0.967792	0.588525	MnPO
Garnl3	0.967792	1	MnPO
Rnf8	0.969458	1	MnPO
Wscd2	0.971122	1	MnPO
Gm40578	0.972787	0.545993	MnPO
Zfp704	0.972787	1	MnPO
Prmt2	0.974451	1	MnPO
Fam219a	0.976114	1	MnPO
Pcnx2	0.977777	1	MnPO
Cyfip2	0.97944	1	MnPO
Smc6	0.981102	1	MnPO
4930590L20Rik	0.982764	1	MnPO
Vopp1	0.984425	1	MnPO
Synj2bp	0.986086	1	MnPO
Abca5	0.987746	1	MnPO
Pde8b	0.989406	0.932714	MnPO
Plxna2	0.989406	1	MnPO
Cdc7	0.991066	1	MnPO
Zbtb20	0.992725	1	MnPO
Lamtor4	0.992725	1	MnPO
Fam171b	0.994383	0.802368	MnPO
Tmem63b	0.994383	1	MnPO
Fstl1	0.996041	0.878873	MnPO
Prkaa2	0.996041	1	MnPO
Omg	0.997699	1	MnPO
Wdr45b	0.997699	0.863646	MnPO
Grin2c	0.999356	0.986086	MnPO
Nme7	0.999356	1	MnPO
Gng11	1	0.909216	MnPO
Hivep3	1	1	MnPO
Tmcc3	1	0.846684	MnPO
Mfsd2a	1	1	MnPO
Phactr1	1	0.730126	MnPO
Zfhx3	1	0.800657	MnPO
Zfas1	1	0.705867	MnPO
Eef1b2	1	0.987746	MnPO
Tle5	1	0.660575	MnPO
Arf3	1	1	MnPO
Hif3a	1	0.910898	MnPO
Atp6ap1	1	1	MnPO
2210408F21Rik	1	0.773224	MnPO
Lrmda	1	0.504986	MnPO
Phyhd1	1	1	MnPO
Gm10076	1	0.524628	MnPO
Rpl30	1	0.947772	MnPO
Hrh1	1	0.949443	MnPO
Tesk2	1	1	MnPO
Cyp2d22	1	1	MnPO
Urgcp	1	1	MnPO
Gaa	1	0.332765	MnPO
2900052N01Rik	1	0.836485	MnPO
Ppargc1b	1	1	MnPO
Ralyl	1	0.104508	MnPO
Dnm2	1	1	MnPO
Map6	1	1	MnPO
Cdh7	1	1	MnPO
Ddx39b	1	1	MnPO
Fcho1	1	1	MnPO
Sv2b	1	1	MnPO
Adam10	1	1	MnPO
Cntn3	1	0.897434	MnPO
Pum2	1	1	MnPO
Uvssa	1	1	MnPO
Ensa	1	1	MnPO
Fbn1	1	1	MnPO
Ppme1	1	1	MnPO
Sdk1	1	0.26609	MnPO
Map1b	1	1	MnPO
Adss	1	1	MnPO
Hs6st3	1	0.28562	MnPO
Dcc	1	0.144618	MnPO
2610037D02Rik	1	1	MnPO
Ykt6	1	1	MnPO
Ap3b2	1	1	MnPO
Sptb	1	1	MnPO
Actn4	1	1	MnPO
Slc17a6	1	1	MnPO
Ttc26	1	0.798946	MnPO
Calm2	1	1	MnPO
Unc5c	1	0.238072	MnPO
Reps2	1	1	MnPO
Cntnap5c	1	1	MnPO
Ddx55	1	0.616734	MnPO
Eif5b	1	1	MnPO
Ccdc191	1	1	MnPO
Marf1	1	1	MnPO
9530059O14Rik	1	1	MnPO
Rbm33	1	1	MnPO
Cacna1a	1	0.175939	MnPO
Cdr1os	1	0.335526	MnPO
Zfp618	1	1	MnPO
Dctn2	1	1	MnPO
Lpgat1	1	0.941084	MnPO
Chrm3	1	0.478111	MnPO
Dlgap3	1	1	MnPO
Galntl6	1	0.0389481	MnPO
Cys1	1	1	MnPO
Rybp	1	1	MnPO
Hcn2	1	1	MnPO
Srcin1	1	1	MnPO
Rap1gap2	1	1	MnPO
Glra3	1	1	MnPO
Thsd7b	1	0.212736	MnPO
Rif1	1	1	MnPO
Mirg	1	0.485288	MnPO
Hbs1l	1	1	MnPO
Raph1	1	1	MnPO
Ptpn23	1	1	MnPO
Dpp6	1	0.124597	MnPO
Epha5	1	0.637813	MnPO
Vwa5b2	1	1	MnPO
Robo2	1	1	MnPO
B3galnt1	1	0.974451	MnPO
Senp5	1	1	MnPO
Gnas	1	0.374032	MnPO
Zkscan16	1	1	MnPO
Gprasp2	1	0.752573	MnPO
Lmbr1	1	1	MnPO
Pde3b	1	0.977777	MnPO
Rnf150	1	1	MnPO
Stx3	1	1	MnPO
Vstm2a	1	1	MnPO
Sh3gl3	1	1	MnPO
Map3k12	1	1	MnPO
Ankrd10	1	1	MnPO
Prkacb	1	1	MnPO
Zfp318	1	1	MnPO
4930588A03Rik	1	1	MnPO
Gid4	1	1	MnPO
Bmerb1	1	1	MnPO
Prkcz	1	1	MnPO
Mmp16	1	1	MnPO
Vps53	1	1	MnPO
Dock9	1	1	MnPO
Cyp46a1	1	1	MnPO
Klc1	1	1	MnPO
Ajap1	1	1	MnPO
Sntg1	1	0.204265	MnPO
Sgcz	1	0.0853096	MnPO
Sez6l	1	1	MnPO
Bzw2	1	1	MnPO
Slc2a13	1	1	MnPO
Hcrtr2	1	1	MnPO
Lancl1	1	1	MnPO
Ralgapa2	1	0.526411	MnPO
Pdgfa	1	1	MnPO
Clcn3	1	1	MnPO
Unc5d	1	0.173099	MnPO
Rtl1	1	1	MnPO
Khdrbs3	1	1	MnPO
Rnf32	1	1	MnPO
Jazf1	1	1	MnPO
Nfasc	1	0.458338	MnPO
Slc38a2	1	1	MnPO
Mapre3	1	1	MnPO
Ndfip1	1	1	MnPO
Psmd4	1	1	MnPO
Dynlt3	1	0.66407	MnPO
Tmem167	1	1	MnPO
Xpo6	1	0.97944	MnPO
Celf6	1	1	MnPO
Hmgcll1	1	1	MnPO
Ica1l	1	1	MnPO
Gabpb1	1	1	MnPO
Ano3	1	1	MnPO
Pja2	1	1	MnPO
Cdh4	1	0.691964	MnPO
Als2	1	1	MnPO
Celf3	1	1	MnPO
Kifap3	1	1	MnPO
Tm7sf3	1	1	MnPO
Tom1	1	1	MnPO
Ncbp2	1	1	MnPO
Me3	1	1	MnPO
Parn	1	0.844985	MnPO
Mvb12b	1	1	MnPO
Slc25a23	1	0.581455	MnPO
Tmem163	1	1	MnPO
Pgap1	1	0.62201	MnPO
Lmtk3	1	1	MnPO
Ep300	1	1	MnPO
Bsn	1	1	MnPO
4930595D18Rik	1	1	MnPO
Pitpnm3	1	1	MnPO
St7l	1	1	MnPO
Fam120b	1	1	MnPO
Stxbp5l	1	0.442119	MnPO
Gad2	1	1	MnPO
Stx1b	1	1	MnPO
Pbdc1	1	1	MnPO
Sppl2a	1	1	MnPO
Esyt2	1	1	MnPO
A330015K06Rik	1	1	MnPO
Nudt5	1	1	MnPO
L3mbtl1	1	1	MnPO
Rsbn1	1	1	MnPO
Arid5b	1	1	MnPO
Dazap1	1	1	MnPO
Napg	1	1	MnPO
Lrpap1	1	1	MnPO
Ripor2	1	1	MnPO
Rnf220	1	1	MnPO
Tex9	1	1	MnPO
Schip1	1	0.868726	MnPO
Ccnt1	1	1	MnPO
Gripap1	1	1	MnPO
Kcnc1	1	1	MnPO
Gdap1	1	1	MnPO
Slc12a6	1	1	MnPO
Prkcb	1	1	MnPO
Arhgap18	1	0.819449	MnPO
Rab10	1	1	MnPO
Snrk	1	1	MnPO
Klhl29	1	1	MnPO
Cacfd1	1	1	MnPO
Ndst3	1	1	MnPO
Cdc27	1	1	MnPO
Tmem131	1	1	MnPO
Utp14a	1	1	MnPO
Atr	1	1	MnPO
Jakmip2	1	0.461937	MnPO
Inpp4b	1	1	MnPO
Cacna2d1	1	0.280047	MnPO
Zfp407	1	1	MnPO
Pnpt1	1	1	MnPO
Hmbox1	1	1	MnPO
Pkd1	1	1	MnPO
Gm11418	1	1	MnPO
Eif4g1	1	1	MnPO
Heca	1	1	MnPO
Dcp1a	1	1	MnPO
Dnajc10	1	1	MnPO
Cyth3	1	0.561974	MnPO
Rnpc3	1	1	MnPO
Aco2	1	0.829676	MnPO
Mipol1	1	1	MnPO
Arhgap39	1	0.414987	MnPO
Traf3	1	1	MnPO
Lin7a	1	0.877183	MnPO
Hecw2	1	0.802368	MnPO
Neto1	1	1	MnPO
Tspoap1	1	1	MnPO
Zcchc4	1	1	MnPO
Zc2hc1a	1	1	MnPO
Xrn2	1	1	MnPO
Rars2	1	1	MnPO
Slco3a1	1	1	MnPO
Hs3st5	1	1	MnPO
Sirt5	1	1	MnPO
Prkg1	1	0.24088	MnPO
Kdm2a	1	1	MnPO
Lnx1	1	1	MnPO
Slc44a5	1	1	MnPO
Desi2	1	1	MnPO
1700111E14Rik	1	1	MnPO
Sh3kbp1	1	1	MnPO
Rimbp2	1	1	MnPO
Rgl1	1	1	MnPO
Snrnp48	1	1	MnPO
Dipk1a	1	0.839886	MnPO
Dnm3	1	0.436704	MnPO
P2ry12	1	0.698919	MnPO
Spopl	1	1	MnPO
Kcnc4	1	0.926009	MnPO
Nipsnap1	1	1	MnPO
Gpr158	1	0.37951	MnPO
Nfyc	1	1	MnPO
Heatr6	1	0.232451	MnPO
Mapkap1	1	1	MnPO
Ift74	1	1	MnPO
Lrfn2	1	1	MnPO
Wac	1	1	MnPO
Aff2	1	0.900803	MnPO
Dmxl2	1	1	MnPO
Wdr12	1	1	MnPO
Gm19461	1	1	MnPO
Cfl2	1	1	MnPO
Ddx20	1	1	MnPO
Phka2	1	1	MnPO
Sympk	1	1	MnPO
Nkain2	1	0.0929968	MnPO
Nemf	1	1	MnPO
Zdhhc14	1	1	MnPO
Brwd1	1	1	MnPO
Rabac1	1	0.805788	MnPO
Timm22	1	1	MnPO
Gpatch2l	1	1	MnPO
Mettl16	1	1	MnPO
Meg3	1	0.0699012	MnPO
Rapgef2	1	1	MnPO
Cerk	1	1	MnPO
Zfp141	1	1	MnPO
Slf1	1	1	MnPO
Tbc1d1	1	1	MnPO
Syt13	1	1	MnPO
Vwc2l	1	1	MnPO
Zfp292	1	1	MnPO
Slit1	1	1	MnPO
Gca	1	1	MnPO
Chsy3	1	1	MnPO
Tango6	1	1	MnPO
Osbpl6	1	1	MnPO
Lmbrd2	1	1	MnPO
Sema6a	1	1	MnPO
Mad2l2	1	1	MnPO
Wdr20	1	1	MnPO
Ipo9	1	1	MnPO
Atg10	1	1	MnPO
Copg1	1	1	MnPO
Abhd15	1	1	MnPO
Yaf2	1	1	MnPO
Ggact	1	1	MnPO
3110056K07Rik	1	0.535319	MnPO
Prpf8	1	1	MnPO
Zcchc14	1	1	MnPO
Morf4l1	1	1	MnPO
Sec24b	1	1	MnPO
Gramd4	1	1	MnPO
Enox1	1	0.412267	MnPO
Ctsb	1	0.771506	MnPO
Hnrnpul1	1	1	MnPO
Filip1l	1	0.914259	MnPO
Gxylt1	1	1	MnPO
Adarb2	1	0.226825	MnPO
Nlk	1	1	MnPO
Fcho2	1	1	MnPO
Phlpp2	1	1	MnPO
1700024B18Rik	1	1	MnPO
Tsc22d1	1	1	MnPO
Atcay	1	1	MnPO
Ppp4r3a	1	0.476316	MnPO
Nfs1	1	0.551324	MnPO
Pde1a	1	0.483495	MnPO
Plxdc2	1	1	MnPO
Eml5	1	1	MnPO
Ube2q2	1	0.726666	MnPO
Donson	1	1	MnPO
Smc1a	1	1	MnPO
Gm2824	1	1	MnPO
Tsen15	1	1	MnPO
Selenon	1	0.870418	MnPO
Dalrd3	1	1	MnPO
Castor2	1	1	MnPO
Mthfd2l	1	1	MnPO
Gm10550	1	1	MnPO
Ikzf5	1	0.858562	MnPO
8030462N17Rik	1	1	MnPO
Gm45341	1	1	MnPO
Grip1	1	0.44753	MnPO
Mctp1	1	1	MnPO
Adam11	1	1	MnPO
AI480526	1	1	MnPO
Elp4	1	1	MnPO
Ttc7b	1	1	MnPO
Vps35l	1	1	MnPO
St6gal2	1	1	MnPO
Prdm10	1	1	MnPO
Cr1l	1	1	MnPO
Rbm28	1	1	MnPO
Bclaf1	1	1	MnPO
Ntng1	1	1	MnPO
Mkln1os	1	1	MnPO
Abi2	1	1	MnPO
Tmem108	1	0.912579	MnPO
3110082I17Rik	1	1	MnPO
Fktn	1	0.786955	MnPO
A930015D03Rik	1	1	MnPO
Gls	1	1	MnPO
4921534H16Rik	1	1	MnPO
Bclaf3	1	1	MnPO
Csmd2	1	1	MnPO
Tmem59l	1	1	MnPO
Cmtm4	1	1	MnPO
Zfp950	1	0.40137	MnPO
Akap8	1	1	MnPO
Pptc7	1	0.451134	MnPO
Gm42722	1	1	MnPO
Manf	1	1	MnPO
Eri3	1	1	MnPO
Zfp37	1	0.667563	MnPO
Ppp1r8	1	1	MnPO
Wnk3	1	1	MnPO
Emc7	1	1	MnPO
Rad23b	1	0.681517	MnPO
Nat14	1	1	MnPO
Nell2	1	1	MnPO
Ppp4r1	1	1	MnPO
Ptpn11	1	1	MnPO
Nvl	1	1	MnPO
Flrt2	1	0.981102	MnPO
Cnot10	1	1	MnPO
Capn7	1	0.547771	MnPO
Arhgap12	1	1	MnPO
Ddb2	1	1	MnPO
Stac2	1	1	MnPO
Etl4	1	0.37129	MnPO
C130073E24Rik	1	0.481701	MnPO
Kcnh5	1	1	MnPO
Ap2b1	1	1	MnPO
Zfp598	1	1	MnPO
E230029C05Rik	1	1	MnPO
Gm4924	1	1	MnPO
Psmd11	1	1	MnPO
Wdr36	1	1	MnPO
Bbs9	1	1	MnPO
Senp2	1	0.821155	MnPO
Chrm2	1	1	MnPO
Slc4a8	1	1	MnPO
Asxl3	1	1	MnPO
Zfp26	1	1	MnPO
Glg1	1	0.932714	MnPO
Arnt	1	1	MnPO
Ppp2r2c	1	1	MnPO
Psmd7	1	1	MnPO
Tox3	1	1	MnPO
Cacng7	1	1	MnPO
Entpd6	1	1	MnPO
Ercc8	1	1	MnPO
2810004N23Rik	1	1	MnPO
Wdr13	1	1	MnPO
Mrps10	1	1	MnPO
Phf20	1	1	MnPO
Chn2	1	1	MnPO
Tsga10	1	1	MnPO
Lrp6	1	1	MnPO
Tk2	1	1	MnPO
Acvr2a	1	1	MnPO
Faf1	1	1	MnPO
Copg2	1	0.688483	MnPO
Myo5a	1	1	MnPO
Prickle1	1	1	MnPO
Coro2b	1	1	MnPO
Rsph3a	1	1	MnPO
Grik1	1	0.814329	MnPO
Arhgef18	1	1	MnPO
Chd3	1	1	MnPO
Fsd1	1	1	MnPO
Recql	1	0.997699	MnPO
Dip2b	1	1	MnPO
Zmat3	1	0.756019	MnPO
Sh3pxd2a	1	1	MnPO
Cacna2d3	1	0.282834	MnPO
Pds5a	1	0.68326	MnPO
Zmynd8	1	1	MnPO
Nars	1	1	MnPO
Tex2	1	1	MnPO
Ccser1	1	0.178778	MnPO
Gnal	1	1	MnPO
Ube2h	1	1	MnPO
Necab3	1	1	MnPO
Rictor	1	1	MnPO
D630045J12Rik	1	1	MnPO
Acat2	1	1	MnPO
Tecr	1	1	MnPO
Arhgef15	1	1	MnPO
Ube4a	1	0.956122	MnPO
Kctd3	1	1	MnPO
Memo1	1	1	MnPO
Dgki	1	0.32724	MnPO
Cul4a	1	1	MnPO
Rad17	1	0.648328	MnPO
Bbip1	1	1	MnPO
Dmxl1	1	0.724935	MnPO
Chst11	1	1	MnPO
Wdr70	1	1	MnPO
Ptpro	1	1	MnPO
Odf2	1	1	MnPO
Ppil2	1	1	MnPO
Rapgef6	1	1	MnPO
Rps6kb1	1	1	MnPO
Tbc1d22a	1	1	MnPO
Fam135a	1	1	MnPO
Iqgap1	1	1	MnPO
Tbc1d14	1	1	MnPO
Arhgef11	1	1	MnPO
Csnk1g3	1	1	MnPO
Wipf2	1	1	MnPO
Ctnna3	1	0.346555	MnPO
Zc3h15	1	1	MnPO
E130307A14Rik	1	0.542437	MnPO
Ssh2	1	0.669309	MnPO
Tusc3	1	1	MnPO
Afdn	1	0.996041	MnPO
Aifm1	1	0.87211	MnPO
Tshz2	1	1	MnPO
Dcun1d4	1	1	MnPO
Ubap2l	1	0.685001	MnPO
Cspg5	1	1	MnPO
Exoc6	1	1	MnPO
Ephb2	1	1	MnPO
Pdhx	1	1	MnPO
Gm49961	1	1	MnPO
Sorcs3	1	0.766348	MnPO
Epha4	1	1	MnPO
Esrrg	1	1	MnPO
Ddrgk1	1	1	MnPO
Ralgps1	1	0.662323	MnPO
Pcf11	1	1	MnPO
Oxsr1	1	1	MnPO
Zmiz1os1	1	1	MnPO
Apba1	1	0.357563	MnPO
Kdm5a	1	0.882252	MnPO
Tmem138	1	1	MnPO
Setd5	1	0.754296	MnPO
Med27	1	1	MnPO
Pkp4	1	1	MnPO
Cpne4	1	1	MnPO
Mia2	1	0.693703	MnPO
Araf	1	1	MnPO
Jkamp	1	1	MnPO
Rab27a	1	1	MnPO
Rab11fip4	1	1	MnPO
Dbndd2	1	1	MnPO
Prrc2a	1	1	MnPO
Kcnk10	1	1	MnPO
Unc79	1	0.737041	MnPO
Arvcf	1	1	MnPO
Ccz1	1	1	MnPO
Ifnar1	1	1	MnPO
Ctnna2	1	0.198611	MnPO
Ube2g1	1	1	MnPO
Zdhhc20	1	1	MnPO
Rnpep	1	1	MnPO
Gm15834	1	1	MnPO
Ranbp3	1	1	MnPO
Vps13d	1	0.750849	MnPO
Arl3	1	1	MnPO
Xylt1	1	1	MnPO
Kcnc2	1	0.368548	MnPO
Smarcc2	1	1	MnPO
Csmd3	1	0.215557	MnPO
Lrrc45	1	1	MnPO
Smyd4	1	0.982764	MnPO
Ankrd55	1	1	MnPO
Tspan18	1	1	MnPO
Frmd4b	1	1	MnPO
Atxn2	1	1	MnPO
Nmd3	1	1	MnPO
Gm15478	1	1	MnPO
Spata6	1	1	MnPO
Papola	1	0.700657	MnPO
Klhl7	1	1	MnPO
Gak	1	1	MnPO
Mapk8	1	1	MnPO
Trim46	1	1	MnPO
E130308A19Rik	1	1	MnPO
Gfod2	1	1	MnPO
Mical3	1	1	MnPO
1810034E14Rik	1	0.3438	MnPO
Usp47	1	1	MnPO
Lyst	1	1	MnPO
Dner	1	1	MnPO
Pacs2	1	0.570836	MnPO
Ankfn1	1	1	MnPO
Parp6	1	1	MnPO
Ampd3	1	1	MnPO
Dpysl2	1	1	MnPO
Trmt61b	1	1	MnPO
Sulf2	1	1	MnPO
Hace1	1	1	MnPO
Hk1	1	1	MnPO
Cdc26	1	0.577917	MnPO
Pld5	1	1	MnPO
Nol4l	1	1	MnPO
Trim35	1	0.962793	MnPO
Cnot1	1	1	MnPO
Map4k5	1	0.310629	MnPO
Agap1	1	1	MnPO
Dennd1b	1	1	MnPO
Ptprk	1	1	MnPO
Zfp280c	1	1	MnPO
2410080I02Rik	1	1	MnPO
Med14	1	1	MnPO
Lysmd4	1	1	MnPO
Dok6	1	1	MnPO
Ctsl	1	0.905852	MnPO
Rasa1	1	1	MnPO
Efcab2	1	0.937737	MnPO
Traf3ip2	1	1	MnPO
Ctif	1	0.705867	MnPO
Map2k4	1	1	MnPO
Ftx	1	0.590292	MnPO
Zfp975	1	1	MnPO
Gm48742	1	1	MnPO
Nalcn	1	0.449332	MnPO
Uhrf1bp1l	1	0.922654	MnPO
Slc39a13	1	1	MnPO
Cdc42se2	1	1	MnPO
Fbxl7	1	1	MnPO
Apex2	1	0.558426	MnPO
9430015G10Rik	1	1	MnPO
Xkr6	1	1	MnPO
Slc44a1	1	1	MnPO
[truncated: 2,330 more rows]

## Sheet: GSEA_Aggregated_signatures
class	term_name	precision	recall	p_value	query_size	intersection_size	term_size	term_id	source	effective_domain_size	source_order
ARC	system development	0.409742	0.0347509	1.7094e-28	349	143	4115	GO:0048731	GO:BP	27205	13728
ARC	anatomical structure development	0.510029	0.0285806	2.87836e-27	349	178	6228	GO:0048856	GO:BP	27205	13840
ARC	nervous system development	0.312321	0.0426614	2.90661e-27	349	109	2555	GO:0007399	GO:BP	27205	2969
ARC	developmental process	0.535817	0.0272396	1.31729e-26	349	187	6865	GO:0032502	GO:BP	27205	8032
ARC	multicellular organism development	0.43553	0.0311923	1.25947e-25	349	152	4873	GO:0007275	GO:BP	27205	2871
ARC	biological regulation	0.782235	0.0197283	5.92063e-23	349	273	13838	GO:0065007	GO:BP	27205	16811
ARC	regulation of cellular process	0.724928	0.0205557	6.65789e-22	349	253	12308	GO:0050794	GO:BP	27205	14008
ARC	generation of neurons	0.226361	0.0484365	9.28041e-22	349	79	1631	GO:0048699	GO:BP	27205	13696
ARC	regulation of biological process	0.762178	0.0198153	9.46848e-22	349	266	13424	GO:0050789	GO:BP	27205	14004
ARC	neurogenesis	0.240688	0.0448958	3.33839e-21	349	84	1871	GO:0022008	GO:BP	27205	6923
ARC	positive regulation of biological process	0.492837	0.0255496	5.45673e-20	349	172	6732	GO:0048518	GO:BP	27205	13539
ARC	anatomical structure morphogenesis	0.292264	0.0365985	7.067e-20	349	102	2787	GO:0009653	GO:BP	27205	3648
ARC	positive regulation of cellular process	0.458453	0.02668	7.56784e-20	349	160	5997	GO:0048522	GO:BP	27205	13543
ARC	neuron differentiation	0.212034	0.0475884	1.16484e-19	349	74	1555	GO:0030182	GO:BP	27205	7062
ARC	regulation of signaling	0.329513	0.0322129	1.5739e-18	349	115	3570	GO:0023051	GO:BP	27205	7001
ARC	regulation of cell communication	0.329513	0.0321768	1.72494e-18	349	115	3574	GO:0010646	GO:BP	27205	4388
ARC	cellular developmental process	0.381089	0.0280118	6.53117e-17	349	133	4748	GO:0048869	GO:BP	27205	13852
ARC	cell differentiation	0.378223	0.0279958	1.04629e-16	349	132	4715	GO:0030154	GO:BP	27205	7050
ARC	regulation of biological quality	0.295129	0.0317509	1.52918e-15	349	103	3244	GO:0065008	GO:BP	27205	16812
ARC	cell junction organization	0.13467	0.0588972	6.88393e-15	349	47	798	GO:0034330	GO:BP	27205	9021
ARC	regulation of response to stimulus	0.332378	0.0285996	1.30337e-14	349	116	4056	GO:0048583	GO:BP	27205	13594
ARC	regulation of cellular component organization	0.252149	0.0340821	1.70531e-14	349	88	2582	GO:0051128	GO:BP	27205	14274
ARC	positive regulation of metabolic process	0.323782	0.0286729	3.60623e-14	349	113	3941	GO:0009893	GO:BP	27205	3831
ARC	regulation of metabolic process	0.47851	0.0229964	3.82874e-14	349	167	7262	GO:0019222	GO:BP	27205	5900
ARC	regulation of signal transduction	0.272206	0.0318578	4.73349e-14	349	95	2982	GO:0009966	GO:BP	27205	3882
ARC	regulation of primary metabolic process	0.418338	0.0246081	5.88969e-14	349	146	5933	GO:0080090	GO:BP	27205	18790
ARC	cell migration	0.183381	0.0415045	1.48885e-13	349	64	1542	GO:0016477	GO:BP	27205	5356
ARC	cellular component organization	0.489971	0.0223998	1.62049e-13	349	171	7634	GO:0016043	GO:BP	27205	5200
ARC	negative regulation of cellular process	0.369628	0.0259296	2.31646e-13	349	129	4975	GO:0048523	GO:BP	27205	13544
ARC	response to stimulus	0.604585	0.0199132	6.228e-13	349	211	10596	GO:0050896	GO:BP	27205	14092
ARC	cell adhesion	0.174785	0.0416951	7.32263e-13	349	61	1463	GO:0007155	GO:BP	27205	2782
ARC	multicellular organismal process	0.547278	0.0208698	8.26556e-13	349	191	9152	GO:0032501	GO:BP	27205	8031
ARC	regulation of developmental process	0.249284	0.0321984	8.8453e-13	349	87	2702	GO:0050793	GO:BP	27205	14007
ARC	cellular component organization or biogenesis	0.492837	0.0219528	9.61624e-13	349	172	7835	GO:0071840	GO:BP	27205	17895
ARC	synapse organization	0.103152	0.0677966	1.08515e-12	349	36	531	GO:0050808	GO:BP	27205	14020
ARC	neuron development	0.160458	0.0442338	1.16561e-12	349	56	1266	GO:0048666	GO:BP	27205	13664
ARC	regulation of macromolecule metabolic process	0.444126	0.022912	2.39656e-12	349	155	6765	GO:0060255	GO:BP	27205	15305
ARC	localization	0.386819	0.0245857	2.46945e-12	349	135	5491	GO:0051179	GO:BP	27205	14323
ARC	negative regulation of biological process	0.409742	0.0238333	2.74083e-12	349	143	6000	GO:0048519	GO:BP	27205	13540
ARC	regulation of nitrogen compound metabolic process	0.395415	0.0240334	6.36309e-12	349	138	5742	GO:0051171	GO:BP	27205	14316
ARC	regulation of cellular metabolic process	0.383954	0.0243194	8.31719e-12	349	134	5510	GO:0031323	GO:BP	27205	7510
ARC	positive regulation of macromolecule metabolic process	0.292264	0.0281457	9.34571e-12	349	102	3624	GO:0010604	GO:BP	27205	4347
ARC	cell motility	0.186246	0.0374208	1.20435e-11	349	65	1737	GO:0048870	GO:BP	27205	13853
ARC	cell morphogenesis	0.140401	0.0467557	1.20521e-11	349	49	1048	GO:0000902	GO:BP	27205	249
ARC	animal organ development	0.275072	0.0288635	1.75752e-11	349	96	3326	GO:0048513	GO:BP	27205	13536
ARC	cellular process	0.919771	0.0154841	1.85423e-11	349	321	20731	GO:0009987	GO:BP	27205	3889
ARC	cell junction assembly	0.0916905	0.069869	2.1876e-11	349	32	458	GO:0034329	GO:BP	27205	9020
ARC	cell development	0.26361	0.0293087	3.16511e-11	349	92	3139	GO:0048468	GO:BP	27205	13507
ARC	neuron projection development	0.140401	0.0441441	1.07071e-10	349	49	1110	GO:0031175	GO:BP	27205	7471
ARC	cell communication	0.469914	0.0213709	1.27408e-10	349	164	7674	GO:0007154	GO:BP	27205	2781
ARC	signaling	0.464183	0.021457	1.48145e-10	349	162	7550	GO:0023052	GO:BP	27205	7002
ARC	cell-cell signaling	0.180516	0.0360412	1.87751e-10	349	63	1748	GO:0007267	GO:BP	27205	2864
ARC	regulation of cell migration	0.12894	0.046344	2.39757e-10	349	45	971	GO:0030334	GO:BP	27205	7143
ARC	cellular response to endogenous stimulus	0.17192	0.0362319	6.53592e-10	349	60	1656	GO:0071495	GO:BP	27205	17675
ARC	positive regulation of nitrogen compound metabolic process	0.25788	0.0281426	7.1904e-10	349	90	3198	GO:0051173	GO:BP	27205	14318
ARC	response to endogenous stimulus	0.189112	0.0335707	1.13737e-09	349	66	1966	GO:0009719	GO:BP	27205	3694
ARC	positive regulation of cellular metabolic process	0.249284	0.0284314	1.16937e-09	349	87	3060	GO:0031325	GO:BP	27205	7512
ARC	positive regulation of biosynthetic process	0.197708	0.0324096	1.5672e-09	349	69	2129	GO:0009891	GO:BP	27205	3829
ARC	establishment of localization	0.335244	0.0242588	1.61115e-09	349	117	4823	GO:0051234	GO:BP	27205	14353
ARC	regulation of cell motility	0.12894	0.0436893	1.85573e-09	349	45	1030	GO:2000145	GO:BP	27205	26747
ARC	brain development	0.111748	0.0489335	2.31171e-09	349	39	797	GO:0007420	GO:BP	27205	2986
ARC	locomotion	0.151862	0.0378571	3.75256e-09	349	53	1400	GO:0040011	GO:BP	27205	10464
ARC	plasma membrane bounded cell projection organization	0.166189	0.0355175	3.94994e-09	349	58	1633	GO:0120036	GO:BP	27205	20549
ARC	cellular component morphogenesis	0.114613	0.0470035	4.09263e-09	349	40	851	GO:0032989	GO:BP	27205	8397
ARC	transport	0.323782	0.0242281	5.4263e-09	349	113	4664	GO:0006810	GO:BP	27205	2546
ARC	synaptic signaling	0.120344	0.0446334	5.83316e-09	349	42	941	GO:0099536	GO:BP	27205	20177
ARC	regulation of locomotion	0.12894	0.041744	8.737e-09	349	45	1078	GO:0040012	GO:BP	27205	10465
ARC	phosphate-containing compound metabolic process	0.229226	0.0286738	8.84752e-09	349	80	2790	GO:0006796	GO:BP	27205	2537
ARC	cell projection organization	0.166189	0.0347513	9.57414e-09	349	58	1669	GO:0030030	GO:BP	27205	7016
ARC	behavior	0.106017	0.0486842	1.07113e-08	349	37	760	GO:0007610	GO:BP	27205	3139
ARC	cellular response to stimulus	0.504298	0.0197575	1.14208e-08	349	176	8908	GO:0051716	GO:BP	27205	14697
ARC	phosphorus metabolic process	0.229226	0.0284394	1.34222e-08	349	80	2813	GO:0006793	GO:BP	27205	2534
ARC	intracellular signal transduction	0.217765	0.0291523	1.60539e-08	349	76	2607	GO:0035556	GO:BP	27205	9589
ARC	head development	0.111748	0.0458824	1.64936e-08	349	39	850	GO:0060322	GO:BP	27205	15367
ARC	actin filament-based process	0.108883	0.046798	1.74899e-08	349	38	812	GO:0030029	GO:BP	27205	7015
ARC	organonitrogen compound metabolic process	0.401146	0.021575	2.17367e-08	349	140	6489	GO:1901564	GO:BP	27205	22563
ARC	trans-synaptic signaling	0.114613	0.0443459	2.47374e-08	349	40	902	GO:0099537	GO:BP	27205	20178
ARC	postsynapse organization	0.0601719	0.0850202	2.54357e-08	349	21	247	GO:0099173	GO:BP	27205	20143
ARC	positive regulation of cellular biosynthetic process	0.186246	0.0315841	2.59513e-08	349	65	2058	GO:0031328	GO:BP	27205	7515
ARC	central nervous system development	0.126074	0.0408542	3.15249e-08	349	44	1077	GO:0007417	GO:BP	27205	2983
ARC	cell part morphogenesis	0.103152	0.0479361	3.29668e-08	349	36	751	GO:0032990	GO:BP	27205	8398
ARC	plasma membrane bounded cell projection morphogenesis	0.100287	0.0490196	3.48632e-08	349	35	714	GO:0120039	GO:BP	27205	20550
ARC	response to growth factor	0.103152	0.0478088	3.55374e-08	349	36	753	GO:0070848	GO:BP	27205	17276
ARC	cell projection morphogenesis	0.100287	0.0486111	4.39276e-08	349	35	720	GO:0048858	GO:BP	27205	13842
ARC	cellular response to growth factor stimulus	0.100287	0.0484094	4.92611e-08	349	35	723	GO:0071363	GO:BP	27205	17561
ARC	positive regulation of nucleobase-containing compound metabolic process	0.186246	0.0311005	5.04097e-08	349	65	2090	GO:0045935	GO:BP	27205	12431
ARC	monoatomic ion transmembrane transport	0.120344	0.0413386	6.66162e-08	349	42	1016	GO:0034220	GO:BP	27205	8951
ARC	response to abiotic stimulus	0.140401	0.0368698	7.35059e-08	349	49	1329	GO:0009628	GO:BP	27205	3626
ARC	regulation of cell junction assembly	0.0573066	0.0851064	7.81816e-08	349	20	235	GO:1901888	GO:BP	27205	22843
ARC	neuron projection morphogenesis	0.0974212	0.0486409	8.5424e-08	349	34	699	GO:0048812	GO:BP	27205	13798
ARC	regulation of gene expression	0.346705	0.0224199	1.2021e-07	349	121	5397	GO:0010468	GO:BP	27205	4251
ARC	positive regulation of RNA metabolic process	0.17192	0.0318302	1.38145e-07	349	60	1885	GO:0051254	GO:BP	27205	14370
ARC	cell surface receptor signaling pathway	0.226361	0.0272884	1.4479e-07	349	79	2895	GO:0007166	GO:BP	27205	2793
ARC	positive regulation of nucleic acid-templated transcription	0.163324	0.0327963	1.45188e-07	349	57	1738	GO:1903508	GO:BP	27205	24159
ARC	positive regulation of DNA-templated transcription	0.163324	0.0327963	1.45188e-07	349	57	1738	GO:0045893	GO:BP	27205	12393
ARC	signal transduction	0.415473	0.0207232	1.57134e-07	349	145	6997	GO:0007165	GO:BP	27205	2792
ARC	positive regulation of RNA biosynthetic process	0.163324	0.0326648	1.69417e-07	349	57	1745	GO:1902680	GO:BP	27205	23482
ARC	regulation of cellular component biogenesis	0.117479	0.0408367	1.6997e-07	349	41	1004	GO:0044087	GO:BP	27205	11543
ARC	positive regulation of signaling	0.174785	0.0313464	1.72139e-07	349	61	1946	GO:0023056	GO:BP	27205	7003
ARC	regulation of multicellular organismal process	0.243553	0.0261861	1.79023e-07	349	85	3246	GO:0051239	GO:BP	27205	14358
ARC	cellular localization	0.255014	0.0254941	2.24428e-07	349	89	3491	GO:0051641	GO:BP	27205	14642
ARC	positive regulation of macromolecule biosynthetic process	0.174785	0.0311383	2.24888e-07	349	61	1959	GO:0010557	GO:BP	27205	4305
ARC	anterograde trans-synaptic signaling	0.108883	0.0424581	2.96297e-07	349	38	895	GO:0098916	GO:BP	27205	20010
ARC	chemical synaptic transmission	0.108883	0.0424581	2.96297e-07	349	38	895	GO:0007268	GO:BP	27205	2865
ARC	positive regulation of cellular component organization	0.131805	0.0369181	3.03939e-07	349	46	1246	GO:0051130	GO:BP	27205	14276
ARC	response to oxygen-containing compound	0.186246	0.0298028	3.0551e-07	349	65	2181	GO:1901700	GO:BP	27205	22661
ARC	transmembrane transport	0.151862	0.0336081	3.15177e-07	349	53	1577	GO:0055085	GO:BP	27205	15067
ARC	circulatory system development	0.12894	0.0374065	3.24214e-07	349	45	1203	GO:0072359	GO:BP	27205	18343
ARC	regulation of synapse organization	0.0601719	0.0726644	4.81445e-07	349	21	289	GO:0050807	GO:BP	27205	14019
ARC	tube development	0.126074	0.0375107	4.86875e-07	349	44	1173	GO:0035295	GO:BP	27205	9435
ARC	positive regulation of cell communication	0.17192	0.0308166	4.96125e-07	349	60	1947	GO:0010647	GO:BP	27205	4389
ARC	protein modification process	0.25788	0.0249307	5.47896e-07	349	90	3610	GO:0036211	GO:BP	27205	10015
ARC	positive regulation of transcription by RNA polymerase II	0.13467	0.0356061	6.192e-07	349	47	1320	GO:0045944	GO:BP	27205	12439
ARC	synapse assembly	0.0515759	0.0857143	6.81372e-07	349	18	210	GO:0007416	GO:BP	27205	2982
ARC	regulation of synapse structure or activity	0.0601719	0.0709459	7.47073e-07	349	21	296	GO:0050803	GO:BP	27205	14015
ARC	animal organ morphogenesis	0.120344	0.0381818	7.6686e-07	349	42	1100	GO:0009887	GO:BP	27205	3825
ARC	organic cyclic compound biosynthetic process	0.286533	0.023596	8.18549e-07	349	100	4238	GO:1901362	GO:BP	27205	22388
ARC	biosynthetic process	0.363897	0.0213087	9.43943e-07	349	127	5960	GO:0009058	GO:BP	27205	3310
ARC	heterocycle biosynthetic process	0.277937	0.0237862	1.10007e-06	349	97	4078	GO:0018130	GO:BP	27205	5504
ARC	aromatic compound biosynthetic process	0.277937	0.0237338	1.24013e-06	349	97	4087	GO:0019438	GO:BP	27205	6097
ARC	regulation of biosynthetic process	0.283668	0.0234764	1.38376e-06	349	99	4217	GO:0009889	GO:BP	27205	3827
ARC	cellular biosynthetic process	0.340974	0.0217391	1.39505e-06	349	119	5474	GO:0044249	GO:BP	27205	11577
ARC	modulation of chemical synaptic transmission	0.0916905	0.045911	1.40508e-06	349	32	697	GO:0050804	GO:BP	27205	14016
ARC	regulation of trans-synaptic signaling	0.0916905	0.0458453	1.45568e-06	349	32	698	GO:0099177	GO:BP	27205	20147
ARC	regulation of plasma membrane bounded cell projection organization	0.0945559	0.0446549	1.50601e-06	349	33	739	GO:0120035	GO:BP	27205	20548
ARC	ATP synthesis coupled electron transport	0.034384	0.142857	1.93482e-06	349	12	84	GO:0042773	GO:BP	27205	10935
ARC	regulation of protein metabolic process	0.200573	0.0273758	2.07822e-06	349	70	2557	GO:0051246	GO:BP	27205	14362
ARC	cellular component assembly	0.275072	0.0236046	2.122e-06	349	96	4067	GO:0022607	GO:BP	27205	6977
ARC	negative regulation of response to stimulus	0.151862	0.031851	2.12795e-06	349	53	1664	GO:0048585	GO:BP	27205	13596
ARC	nucleobase-containing compound biosynthetic process	0.272206	0.0237085	2.13982e-06	349	95	4007	GO:0034654	GO:BP	27205	9171
ARC	monoatomic ion transport	0.12894	0.0351288	2.36985e-06	349	45	1281	GO:0006811	GO:BP	27205	2547
ARC	regulation of cell projection organization	0.0945559	0.0438247	2.41312e-06	349	33	753	GO:0031344	GO:BP	27205	7530
ARC	regulation of cellular biosynthetic process	0.275072	0.0235467	2.41885e-06	349	96	4077	GO:0031326	GO:BP	27205	7513
ARC	monoatomic cation transmembrane transport	0.100287	0.0416171	2.83427e-06	349	35	841	GO:0098655	GO:BP	27205	19861
ARC	organic substance biosynthetic process	0.355301	0.0211424	2.92168e-06	349	124	5865	GO:1901576	GO:BP	27205	22571
ARC	homeostatic process	0.157593	0.0308469	3.08889e-06	349	55	1783	GO:0042592	GO:BP	27205	10828
ARC	negative regulation of signaling	0.13467	0.0336195	3.96659e-06	349	47	1398	GO:0023057	GO:BP	27205	7004
ARC	positive regulation of response to stimulus	0.189112	0.0277544	4.06511e-06	349	66	2378	GO:0048584	GO:BP	27205	13595
ARC	negative regulation of signal transduction	0.126074	0.0349762	4.23665e-06	349	44	1258	GO:0009968	GO:BP	27205	3884
ARC	negative regulation of cell communication	0.13467	0.0335475	4.2468e-06	349	47	1401	GO:0010648	GO:BP	27205	4390
ARC	regulation of neuron differentiation	0.0515759	0.0756303	5.12976e-06	349	18	238	GO:0045664	GO:BP	27205	12215
ARC	regulation of intracellular signal transduction	0.148997	0.031382	5.21496e-06	349	52	1657	GO:1902531	GO:BP	27205	23381
ARC	respiratory electron transport chain	0.0372493	0.116071	5.26913e-06	349	13	112	GO:0022904	GO:BP	27205	6993
ARC	cellular nitrogen compound biosynthetic process	0.30659	0.0220937	6.74792e-06	349	107	4843	GO:0044271	GO:BP	27205	11584
ARC	macromolecule modification	0.25788	0.0236531	7.98232e-06	349	90	3805	GO:0043412	GO:BP	27205	11269
ARC	organelle organization	0.243553	0.0242303	8.23061e-06	349	85	3508	GO:0006996	GO:BP	27205	2670
ARC	cell-cell adhesion	0.103152	0.0390033	8.97623e-06	349	36	923	GO:0098609	GO:BP	27205	19855
ARC	regulation of membrane potential	0.0716332	0.0521921	9.19307e-06	349	25	479	GO:0042391	GO:BP	27205	10714
ARC	cytoskeleton organization	0.137536	0.0322364	1.00651e-05	349	48	1489	GO:0007010	GO:BP	27205	2681
ARC	regulation of nucleobase-containing compound metabolic process	0.269341	0.0231015	1.04118e-05	349	94	4069	GO:0019219	GO:BP	27205	5897
ARC	monoatomic cation transport	0.111748	0.0366886	1.05232e-05	349	39	1063	GO:0006812	GO:BP	27205	2548
ARC	cell-cell adhesion via plasma-membrane adhesion molecules	0.0544413	0.0678571	1.10319e-05	349	19	280	GO:0098742	GO:BP	27205	19918
ARC	phosphorylation	0.157593	0.0296976	1.17948e-05	349	55	1852	GO:0016310	GO:BP	27205	5324
ARC	cell morphogenesis involved in differentiation	0.0888252	0.0429363	1.28589e-05	349	31	722	GO:0000904	GO:BP	27205	250
ARC	cellular component biogenesis	0.280802	0.0226119	1.30305e-05	349	98	4334	GO:0044085	GO:BP	27205	11542
ARC	MAPK cascade	0.0945559	0.0408922	1.33461e-05	349	33	807	GO:0000165	GO:BP	27205	59
ARC	cell morphogenesis involved in neuron differentiation	0.0830946	0.0451011	1.38701e-05	349	29	643	GO:0048667	GO:BP	27205	13665
ARC	actin cytoskeleton organization	0.0888252	0.0426997	1.46243e-05	349	31	726	GO:0030036	GO:BP	27205	7022
ARC	regulation of localization	0.180516	0.0274749	1.52095e-05	349	63	2293	GO:0032879	GO:BP	27205	8303
ARC	chemical homeostasis	0.111748	0.0359447	1.84313e-05	349	39	1085	GO:0048878	GO:BP	27205	13859
ARC	positive regulation of signal transduction	0.140401	0.0311111	2.12998e-05	349	49	1575	GO:0009967	GO:BP	27205	3883
ARC	cognition	0.0601719	0.0583333	2.47256e-05	349	21	360	GO:0050890	GO:BP	27205	14087
ARC	regulation of RNA metabolic process	0.252149	0.0232866	2.70422e-05	349	88	3779	GO:0051252	GO:BP	27205	14368
ARC	synaptic membrane adhesion	0.0229226	0.228571	2.80553e-05	349	8	35	GO:0099560	GO:BP	27205	20200
ARC	receptor localization to synapse	0.0315186	0.129412	2.88366e-05	349	11	85	GO:0097120	GO:BP	27205	19545
ARC	tube morphogenesis	0.100287	0.0380022	2.88689e-05	349	35	921	GO:0035239	GO:BP	27205	9403
ARC	protein metabolic process	0.332378	0.0208858	2.88913e-05	349	116	5554	GO:0019538	GO:BP	27205	6189
ARC	regulation of neuron projection development	0.0744986	0.047532	3.04778e-05	349	26	547	GO:0010975	GO:BP	27205	4665
ARC	negative regulation of developmental process	0.108883	0.0355472	3.90827e-05	349	38	1069	GO:0051093	GO:BP	27205	14248
ARC	aerobic electron transport chain	0.0286533	0.144928	4.39308e-05	349	10	69	GO:0019646	GO:BP	27205	6286
ARC	regulation of macromolecule biosynthetic process	0.25788	0.0228079	4.71083e-05	349	90	3946	GO:0010556	GO:BP	27205	4304
ARC	inorganic cation transmembrane transport	0.0916905	0.039604	4.87471e-05	349	32	808	GO:0098662	GO:BP	27205	19868
ARC	regulation of molecular function	0.191977	0.0258687	4.94246e-05	349	67	2590	GO:0065009	GO:BP	27205	16813
ARC	electron transport chain	0.0372493	0.0962963	5.2082e-05	349	13	135	GO:0022900	GO:BP	27205	6992
ARC	regulation of cell population proliferation	0.148997	0.0292135	5.65022e-05	349	52	1780	GO:0042127	GO:BP	27205	10550
ARC	regulation of protein modification process	0.13467	0.0304799	8.27294e-05	349	47	1542	GO:0031399	GO:BP	27205	7552
ARC	purine nucleoside triphosphate biosynthetic process	0.034384	0.102564	8.98954e-05	349	12	117	GO:0009145	GO:BP	27205	3388
ARC	cellular response to hormone stimulus	0.0802292	0.0424242	9.37739e-05	349	28	660	GO:0032870	GO:BP	27205	8294
ARC	regulation of DNA-templated transcription	0.232092	0.0234443	9.449e-05	349	81	3455	GO:0006355	GO:BP	27205	2180
ARC	regulation of nucleic acid-templated transcription	0.232092	0.0234307	9.69112e-05	349	81	3457	GO:1903506	GO:BP	27205	24157
ARC	protein-containing complex localization	0.0458453	0.0704846	0.000108984	349	16	227	GO:0031503	GO:BP	27205	7588
ARC	monoatomic ion homeostasis	0.0773639	0.0432692	0.000110883	349	27	624	GO:0050801	GO:BP	27205	14013
ARC	positive regulation of developmental process	0.12894	0.0308642	0.000116574	349	45	1458	GO:0051094	GO:BP	27205	14249
ARC	regulation of RNA biosynthetic process	0.232092	0.0233295	0.000117052	349	81	3472	GO:2001141	GO:BP	27205	27647
ARC	regulation of anatomical structure morphogenesis	0.0974212	0.0365985	0.000117076	349	34	929	GO:0022603	GO:BP	27205	6973
ARC	oxidative phosphorylation	0.0372493	0.0890411	0.000133087	349	13	146	GO:0006119	GO:BP	27205	2021
ARC	purine nucleoside triphosphate metabolic process	0.0401146	0.0809249	0.000137498	349	14	173	GO:0009144	GO:BP	27205	3387
ARC	enzyme-linked receptor protein signaling pathway	0.100287	0.0356053	0.000143856	349	35	983	GO:0007167	GO:BP	27205	2794
ARC	inorganic ion homeostasis	0.0716332	0.0451264	0.000159526	349	25	554	GO:0098771	GO:BP	27205	19937
ARC	response to hormone	0.100287	0.0353535	0.00017083	349	35	990	GO:0009725	GO:BP	27205	3700
ARC	negative regulation of nitrogen compound metabolic process	0.183381	0.0255387	0.000176447	349	64	2506	GO:0051172	GO:BP	27205	14317
ARC	trans-synaptic signaling by trans-synaptic complex	0.0143266	0.5	0.000192177	349	5	10	GO:0099545	GO:BP	27205	20185
ARC	regulation of transporter activity	0.0515759	0.0598007	0.000194926	349	18	301	GO:0032409	GO:BP	27205	7967
ARC	DNA-templated transcription	0.234957	0.0229306	0.000199883	349	82	3576	GO:0006351	GO:BP	27205	2176
ARC	nucleic acid-templated transcription	0.234957	0.0229242	0.00020232	349	82	3577	GO:0097659	GO:BP	27205	19768
ARC	heart development	0.0773639	0.0419907	0.000203359	349	27	643	GO:0007507	GO:BP	27205	3064
ARC	mitochondrial ATP synthesis coupled electron transport	0.0286533	0.121951	0.000238481	349	10	82	GO:0042775	GO:BP	27205	10937
ARC	ATP biosynthetic process	0.0315186	0.104762	0.000268046	349	11	105	GO:0006754	GO:BP	27205	2506
ARC	monoatomic cation homeostasis	0.0744986	0.0425532	0.000274588	349	26	611	GO:0055080	GO:BP	27205	15064
ARC	inorganic ion transmembrane transport	0.0945559	0.0359477	0.00028195	349	33	918	GO:0098660	GO:BP	27205	19866
ARC	RNA biosynthetic process	0.234957	0.0227462	0.000283247	349	82	3605	GO:0032774	GO:BP	27205	8240
ARC	blood circulation	0.0687679	0.0451977	0.000285558	349	24	531	GO:0008015	GO:BP	27205	3168
ARC	protein localization to postsynaptic membrane	0.025788	0.140625	0.000299272	349	9	64	GO:1903539	GO:BP	27205	24190
ARC	regulation of transport	0.151862	0.0274611	0.00030206	349	53	1930	GO:0051049	GO:BP	27205	14219
ARC	energy coupled proton transmembrane transport, against electrochemical gradient	0.0114613	0.8	0.000313764	349	4	5	GO:0015988	GO:BP	27205	5187
ARC	electron transport coupled proton transport	0.0114613	0.8	0.000313764	349	4	5	GO:0015990	GO:BP	27205	5188
ARC	response to organic cyclic compound	0.108883	0.0327869	0.00031488	349	38	1159	GO:0014070	GO:BP	27205	4755
ARC	protein localization to postsynapse	0.025788	0.138462	0.00034348	349	9	65	GO:0062237	GO:BP	27205	16804
ARC	nucleoside triphosphate biosynthetic process	0.034384	0.0902256	0.000374606	349	12	133	GO:0009142	GO:BP	27205	3385
ARC	protein phosphorylation	0.13467	0.0289231	0.000389922	349	47	1625	GO:0006468	GO:BP	27205	2258
ARC	cellular response to organic substance	0.17765	0.0252135	0.000462411	349	62	2459	GO:0071310	GO:BP	27205	17511
ARC	neuron migration	0.0401146	0.0732984	0.000470692	349	14	191	GO:0001764	GO:BP	27205	444
ARC	metabolic process	0.673352	0.0160136	0.000494169	349	235	14675	GO:0008152	GO:BP	27205	3197
ARC	regulation of synapse assembly	0.034384	0.0875912	0.000518551	349	12	137	GO:0051963	GO:BP	27205	14821
ARC	cellular response to chemical stimulus	0.212034	0.0233218	0.000535399	349	74	3173	GO:0070887	GO:BP	27205	17294
ARC	regulation of transmembrane transporter activity	0.0487106	0.0590278	0.000538617	349	17	288	GO:0022898	GO:BP	27205	6991
ARC	regulation of phosphate metabolic process	0.120344	0.030303	0.000558452	349	42	1386	GO:0019220	GO:BP	27205	5898
ARC	regulation of phosphorus metabolic process	0.120344	0.0302812	0.0005693	349	42	1387	GO:0051174	GO:BP	27205	14319
ARC	nucleoside triphosphate metabolic process	0.0401146	0.0721649	0.000569967	349	14	194	GO:0009141	GO:BP	27205	3384
ARC	learning or memory	0.0515759	0.0555556	0.000583476	349	18	324	GO:0007611	GO:BP	27205	3140
ARC	muscle structure development	0.0802292	0.038674	0.0006276	349	28	724	GO:0061061	GO:BP	27205	16048
ARC	sensory organ development	0.0744986	0.0407524	0.000632225	349	26	638	GO:0007423	GO:BP	27205	2989
ARC	purine ribonucleoside triphosphate metabolic process	0.0372493	0.0778443	0.000644074	349	13	167	GO:0009205	GO:BP	27205	3447
ARC	regulation of MAPK cascade	0.0802292	0.0386207	0.00064528	349	28	725	GO:0043408	GO:BP	27205	11266
ARC	macromolecule biosynthetic process	0.286533	0.0207383	0.000697578	349	100	4822	GO:0009059	GO:BP	27205	3311
ARC	cell-matrix adhesion	0.0429799	0.0657895	0.000703134	349	15	228	GO:0007160	GO:BP	27205	2787
ARC	purine ribonucleoside triphosphate biosynthetic process	0.0315186	0.0948276	0.000746044	349	11	116	GO:0009206	GO:BP	27205	3448
ARC	tissue development	0.157593	0.026203	0.000768438	349	55	2099	GO:0009888	GO:BP	27205	3826
ARC	developmental growth	0.0830946	0.037323	0.000794608	349	29	777	GO:0048589	GO:BP	27205	13600
ARC	circulatory system process	0.0687679	0.0427046	0.00080091	349	24	562	GO:0003013	GO:BP	27205	1483
ARC	embryo development	0.111748	0.0311253	0.000801782	349	39	1253	GO:0009790	GO:BP	27205	3755
ARC	ATP metabolic process	0.034384	0.0839161	0.000827275	349	12	143	GO:0046034	GO:BP	27205	12513
ARC	aerobic respiration	0.0401146	0.0696517	0.000878633	349	14	201	GO:0009060	GO:BP	27205	3312
ARC	response to organic substance	0.229226	0.0223277	0.000917726	349	80	3583	GO:0010033	GO:BP	27205	3923
ARC	negative regulation of cell migration	0.0487106	0.0566667	0.000956935	349	17	300	GO:0030336	GO:BP	27205	7145
ARC	regulation of transmembrane transport	0.0716332	0.0409836	0.000973127	349	25	610	GO:0034762	GO:BP	27205	9198
ARC	anatomical structure formation involved in morphogenesis	0.108883	0.0313273	0.000979375	349	38	1213	GO:0048646	GO:BP	27205	13644
ARC	regulation of transcription by RNA polymerase II	0.17765	0.0246717	0.000981018	349	62	2513	GO:0006357	GO:BP	27205	2182
ARC	purine ribonucleotide metabolic process	0.0544413	0.0509383	0.00102207	349	19	373	GO:0009150	GO:BP	27205	3393
ARC	negative regulation of cellular metabolic process	0.166189	0.0253607	0.00102264	349	58	2287	GO:0031324	GO:BP	27205	7511
ARC	protein localization to synapse	0.0286533	0.104167	0.00107294	349	10	96	GO:0035418	GO:BP	27205	9510
ARC	ribonucleoside triphosphate metabolic process	0.0372493	0.0742857	0.00110403	349	13	175	GO:0009199	GO:BP	27205	3441
ARC	protein localization to cell periphery	0.0544413	0.0506667	0.00110825	349	19	375	GO:1990778	GO:BP	27205	26530
ARC	protein localization	0.180516	0.0244091	0.00112416	349	63	2581	GO:0008104	GO:BP	27205	3195
ARC	positive regulation of cell junction assembly	0.0315186	0.0909091	0.00114466	349	11	121	GO:1901890	GO:BP	27205	22845
ARC	blood vessel development	0.0802292	0.0374833	0.00117277	349	28	747	GO:0001568	GO:BP	27205	367
ARC	regulation of cell differentiation	0.137536	0.0275229	0.00120507	349	48	1744	GO:0045595	GO:BP	27205	12146
ARC	ribonucleoside triphosphate biosynthetic process	0.0315186	0.0901639	0.00124385	349	11	122	GO:0009201	GO:BP	27205	3443
ARC	cellular macromolecule localization	0.180516	0.0243337	0.00125078	349	63	2589	GO:0070727	GO:BP	27205	17211
ARC	cell population proliferation	0.157593	0.0257853	0.0012766	349	55	2133	GO:0008283	GO:BP	27205	3223
ARC	cellular response to oxygen-containing compound	0.12894	0.0283197	0.00131756	349	45	1589	GO:1901701	GO:BP	27205	22662
ARC	regulation of phosphorylation	0.108883	0.0308692	0.00140443	349	38	1231	GO:0042325	GO:BP	27205	10666
ARC	intracellular chemical homeostasis	0.0802292	0.0370861	0.00144814	349	28	755	GO:0055082	GO:BP	27205	15066
ARC	cell death	0.163324	0.0252548	0.00149764	349	57	2257	GO:0008219	GO:BP	27205	3218
ARC	macromolecule localization	0.203438	0.0230519	0.00155655	349	71	3080	GO:0033036	GO:BP	27205	8425
ARC	response to lipid	0.103152	0.0316623	0.00157502	349	36	1137	GO:0033993	GO:BP	27205	8812
ARC	localization within membrane	0.0773639	0.0376045	0.00177529	349	27	718	GO:0051668	GO:BP	27205	14668
ARC	regulation of postsynaptic membrane neurotransmitter receptor levels	0.0315186	0.0866142	0.00186248	349	11	127	GO:0099072	GO:BP	27205	20091
ARC	protein localization to cell junction	0.0315186	0.0866142	0.00186248	349	11	127	GO:1902414	GO:BP	27205	23300
ARC	negative regulation of cell motility	0.0487106	0.0539683	0.00188562	349	17	315	GO:2000146	GO:BP	27205	26748
ARC	regulation of lipid metabolic process	0.0544413	0.0488432	0.00192295	349	19	389	GO:0019216	GO:BP	27205	5894
ARC	energy derivation by oxidation of organic compounds	0.0515759	0.0509915	0.00203107	349	18	353	GO:0015980	GO:BP	27205	5183
ARC	positive regulation of lipid biosynthetic process	0.0286533	0.0970874	0.00207294	349	10	103	GO:0046889	GO:BP	27205	13143
ARC	muscle cell differentiation	0.0573066	0.0465116	0.00211243	349	20	430	GO:0042692	GO:BP	27205	10878
ARC	ribonucleotide metabolic process	0.0544413	0.0482234	0.0023264	349	19	394	GO:0009259	GO:BP	27205	3500
ARC	transcription by RNA polymerase II	0.17765	0.0240403	0.00236097	349	62	2579	GO:0006366	GO:BP	27205	2189
ARC	learning	0.0372493	0.0691489	0.00249338	349	13	188	GO:0007612	GO:BP	27205	3141
ARC	positive regulation of neuron projection development	0.0401146	0.0636364	0.00260479	349	14	220	GO:0010976	GO:BP	27205	4666
ARC	vasculature development	0.0802292	0.0359435	0.00267427	349	28	779	GO:0001944	GO:BP	27205	570
ARC	programmed cell death	0.151862	0.0255176	0.00290386	349	53	2077	GO:0012501	GO:BP	27205	4688
ARC	regulation of multicellular organismal development	0.123209	0.0280862	0.0029959	349	43	1531	GO:2000026	GO:BP	27205	26633
ARC	blood vessel morphogenesis	0.0716332	0.0384615	0.00308677	349	25	650	GO:0048514	GO:BP	27205	13537
ARC	ribose phosphate metabolic process	0.0544413	0.0471464	0.00325158	349	19	403	GO:0019693	GO:BP	27205	6330
ARC	positive regulation of synaptic transmission	0.0487106	0.0518293	0.00328415	349	17	328	GO:0050806	GO:BP	27205	14018
ARC	proton motive force-driven mitochondrial ATP synthesis	0.0229226	0.126984	0.00337804	349	8	63	GO:0042776	GO:BP	27205	10938
ARC	presynapse organization	0.0229226	0.126984	0.00337804	349	8	63	GO:0099172	GO:BP	27205	20142
ARC	positive regulation of steroid biosynthetic process	0.017192	0.206897	0.00376424	349	6	29	GO:0010893	GO:BP	27205	4588
ARC	maintenance of synapse structure	0.0200573	0.155556	0.00382654	349	7	45	GO:0099558	GO:BP	27205	20198
ARC	phosphatidylinositol-mediated signaling	0.034384	0.0722892	0.00407322	349	12	166	GO:0048015	GO:BP	27205	13203
ARC	positive regulation of cell migration	0.0659026	0.0400697	0.00417838	349	23	574	GO:0030335	GO:BP	27205	7144
ARC	positive regulation of locomotion	0.0687679	0.0387722	0.00439721	349	24	619	GO:0040017	GO:BP	27205	10470
ARC	growth	0.0945559	0.0317613	0.00442266	349	33	1039	GO:0040007	GO:BP	27205	10460
ARC	cellular respiration	0.0429799	0.0568182	0.00446878	349	15	264	GO:0045333	GO:BP	27205	12059
ARC	cellular response to organic cyclic compound	0.0744986	0.0366714	0.00453932	349	26	709	GO:0071407	GO:BP	27205	17605
ARC	intracellular monoatomic ion homeostasis	0.0630372	0.0410448	0.00477167	349	22	536	GO:0006873	GO:BP	27205	2587
ARC	inositol lipid-mediated signaling	0.034384	0.0710059	0.00491594	349	12	169	GO:0048017	GO:BP	27205	13205
ARC	cellular homeostasis	0.0830946	0.0339578	0.00528509	349	29	854	GO:0019725	GO:BP	27205	6348
ARC	cellular response to nitrogen compound	0.0830946	0.0337995	0.00579056	349	29	858	GO:1901699	GO:BP	27205	22660
ARC	cellular metabolic process	0.555874	0.0164476	0.0060579	349	194	11795	GO:0044237	GO:BP	27205	11571
ARC	positive regulation of intracellular signal transduction	0.0916905	0.0318408	0.00605909	349	32	1005	GO:1902533	GO:BP	27205	23383
ARC	apoptotic process	0.146132	0.0252475	0.00644148	349	51	2020	GO:0006915	GO:BP	27205	2620
ARC	calcium ion homeostasis	0.0487106	0.0492754	0.00650571	349	17	345	GO:0055074	GO:BP	27205	15061
ARC	muscle cell proliferation	0.0429799	0.0549451	0.00675207	349	15	273	GO:0033002	GO:BP	27205	8400
ARC	organophosphate metabolic process	0.0888252	0.0321577	0.00716212	349	31	964	GO:0019637	GO:BP	27205	6280
ARC	regulation of monoatomic ion transmembrane transporter activity	0.0429799	0.0545455	0.00738311	349	15	275	GO:0032412	GO:BP	27205	7970
ARC	protein localization to membrane	0.0687679	0.0375587	0.00758507	349	24	639	GO:0072657	GO:BP	27205	18453
ARC	negative regulation of locomotion	0.0487106	0.0487106	0.00759182	349	17	349	GO:0040013	GO:BP	27205	10466
ARC	proton motive force-driven ATP synthesis	0.0229226	0.114286	0.00761687	349	8	70	GO:0015986	GO:BP	27205	5185
ARC	negative regulation of metabolic process	0.217765	0.0215236	0.00788183	349	76	3531	GO:0009892	GO:BP	27205	3830
ARC	organic substance metabolic process	0.644699	0.0157552	0.00838695	349	225	14281	GO:0071704	GO:BP	27205	17822
ARC	regulation of neuronal synaptic plasticity	0.0229226	0.112676	0.00848911	349	8	71	GO:0048168	GO:BP	27205	13298
ARC	neurotransmitter transport	0.0372493	0.0619048	0.00854561	349	13	210	GO:0006836	GO:BP	27205	2562
ARC	eye development	0.0544413	0.0440835	0.00866556	349	19	431	GO:0001654	GO:BP	27205	382
ARC	positive regulation of cell motility	0.0659026	0.0382696	0.00897044	349	23	601	GO:2000147	GO:BP	27205	26749
ARC	renal system development	0.0487106	0.0480226	0.00917773	349	17	354	GO:0072001	GO:BP	27205	18005
ARC	visual behavior	0.0229226	0.111111	0.00944459	349	8	72	GO:0007632	GO:BP	27205	3160
ARC	visual system development	0.0544413	0.0437788	0.00957558	349	19	434	GO:0150063	GO:BP	27205	21097
ARC	positive regulation of cell projection organization	0.0544413	0.0436782	0.00989759	349	19	435	GO:0031346	GO:BP	27205	7532
ARC	regulation of cell adhesion	0.0773639	0.0342205	0.0103859	349	27	789	GO:0030155	GO:BP	27205	7051
ARC	negative regulation of macromolecule metabolic process	0.206304	0.0217457	0.0107154	349	72	3311	GO:0010605	GO:BP	27205	4348
ARC	regulation of smooth muscle cell migration	0.025788	0.0927835	0.0107161	349	9	97	GO:0014910	GO:BP	27205	4904
ARC	cellular component maintenance	0.025788	0.0927835	0.0107161	349	9	97	GO:0043954	GO:BP	27205	11484
ARC	sensory system development	0.0544413	0.0432802	0.0112859	349	19	439	GO:0048880	GO:BP	27205	13860
ARC	regulation of cell death	0.13467	0.0255991	0.0115842	349	47	1836	GO:0010941	GO:BP	27205	4635
ARC	intracellular monoatomic cation homeostasis	0.0601719	0.039924	0.0125141	349	21	526	GO:0030003	GO:BP	27205	7010
ARC	cellular response to brain-derived neurotrophic factor stimulus	0.0114613	0.4	0.0125237	349	4	10	GO:1990416	GO:BP	27205	26399
ARC	supramolecular fiber organization	0.0773639	0.03375	0.0133665	349	27	800	GO:0097435	GO:BP	27205	19703
ARC	cellular response to nerve growth factor stimulus	0.0200573	0.12963	0.0135269	349	7	54	GO:1990090	GO:BP	27205	26307
ARC	heart process	0.0401146	0.0551181	0.0139567	349	14	254	GO:0003015	GO:BP	27205	1485
ARC	positive regulation of synapse assembly	0.0229226	0.105263	0.0142316	349	8	76	GO:0051965	GO:BP	27205	14823
ARC	synapse maturation	0.017192	0.166667	0.0143101	349	6	36	GO:0060074	GO:BP	27205	15166
ARC	positive regulation of cellular component biogenesis	0.0601719	0.039548	0.01446	349	21	531	GO:0044089	GO:BP	27205	11545
ARC	cell-substrate adhesion	0.0487106	0.0463215	0.0147859	349	17	367	GO:0031589	GO:BP	27205	7637
ARC	response to decreased oxygen levels	0.0487106	0.0461957	0.0153239	349	17	368	GO:0036293	GO:BP	27205	10067
ARC	presynapse assembly	0.0200573	0.127273	0.0153303	349	7	55	GO:0099054	GO:BP	27205	20088
ARC	regulation of endocytosis	0.0458453	0.0483384	0.0162735	349	16	331	GO:0030100	GO:BP	27205	7041
ARC	regulation of neurotransmitter levels	0.0372493	0.058296	0.016442	349	13	223	GO:0001505	GO:BP	27205	335
ARC	regulation of synaptic plasticity	0.0487106	0.0459459	0.016453	349	17	370	GO:0048167	GO:BP	27205	13297
ARC	cellular response to organonitrogen compound	0.0773639	0.0332922	0.0171118	349	27	811	GO:0071417	GO:BP	27205	17615
ARC	response to nerve growth factor	0.0200573	0.125	0.017329	349	7	56	GO:1990089	GO:BP	27205	26306
ARC	actin filament organization	0.0544413	0.0418502	0.0181996	349	19	454	GO:0007015	GO:BP	27205	2683
ARC	response to hypoxia	0.0458453	0.0477612	0.0189169	349	16	335	GO:0001666	GO:BP	27205	391
ARC	retrograde trans-synaptic signaling by trans-synaptic protein complex	0.00859599	0.75	0.0197462	349	3	4	GO:0098942	GO:BP	27205	20030
ARC	metencephalon development	0.0286533	0.0757576	0.0197531	349	10	132	GO:0022037	GO:BP	27205	6951
ARC	cellular response to lipid	0.0744986	0.0336788	0.0207511	349	26	772	GO:0071396	GO:BP	27205	17594
ARC	positive regulation of endocytosis	0.034384	0.0615385	0.0214823	349	12	195	GO:0045807	GO:BP	27205	12331
ARC	positive regulation of transport	0.0916905	0.0299065	0.0218302	349	32	1070	GO:0051050	GO:BP	27205	14220
ARC	regulation of vesicle-mediated transport	0.0630372	0.0372881	0.0219362	349	22	590	GO:0060627	GO:BP	27205	15648
ARC	postsynaptic density organization	0.0200573	0.12069	0.0219785	349	7	58	GO:0097106	GO:BP	27205	19534
ARC	regulation of protein localization	0.0859599	0.0309278	0.0221881	349	30	970	GO:0032880	GO:BP	27205	8304
ARC	ligand-gated ion channel signaling pathway	0.017192	0.153846	0.0232058	349	6	39	GO:1990806	GO:BP	27205	26543
ARC	positive regulation of steroid metabolic process	0.017192	0.153846	0.0232058	349	6	39	GO:0045940	GO:BP	27205	12436
ARC	negative regulation of protein metabolic process	0.0916905	0.0297952	0.0235239	349	32	1074	GO:0051248	GO:BP	27205	14364
ARC	regulation of protein phosphorylation	0.0945559	0.0293073	0.0238355	349	33	1126	GO:0001932	GO:BP	27205	561
ARC	nephron development	0.0315186	0.0666667	0.0239037	349	11	165	GO:0072006	GO:BP	27205	18010
ARC	kidney development	0.0458453	0.0467836	0.0244777	349	16	342	GO:0001822	GO:BP	27205	493
ARC	sensory organ morphogenesis	0.0429799	0.0493421	0.0246994	349	15	304	GO:0090596	GO:BP	27205	19390
ARC	regulation of programmed cell death	0.123209	0.0258258	0.024702	349	43	1665	GO:0043067	GO:BP	27205	11095
ARC	focal adhesion assembly	0.0229226	0.097561	0.0251652	349	8	82	GO:0048041	GO:BP	27205	13216
ARC	generation of precursor metabolites and energy	0.0515759	0.0425532	0.0252443	349	18	423	GO:0006091	GO:BP	27205	1998
ARC	smooth muscle cell migration	0.025788	0.0833333	0.0259239	349	9	108	GO:0014909	GO:BP	27205	4903
ARC	neurotransmitter receptor localization to postsynaptic specialization membrane	0.017192	0.15	0.0270079	349	6	40	GO:0099645	GO:BP	27205	20247
ARC	protein localization to postsynaptic specialization membrane	0.017192	0.15	0.0270079	349	6	40	GO:0099633	GO:BP	27205	20237
ARC	regulation of G protein-coupled receptor signaling pathway	0.0286533	0.0729927	0.0274316	349	10	137	GO:0008277	GO:BP	27205	3222
ARC	negative regulation of neuron differentiation	0.0229226	0.0963855	0.0275419	349	8	83	GO:0045665	GO:BP	27205	12216
ARC	positive regulation of molecular function	0.114613	0.0265428	0.0275989	349	40	1507	GO:0044093	GO:BP	27205	11549
ARC	purine nucleotide metabolic process	0.0544413	0.0405983	0.0278798	349	19	468	GO:0006163	GO:BP	27205	2042
ARC	positive regulation of multicellular organismal process	0.13467	0.0247368	0.0282936	349	47	1900	GO:0051240	GO:BP	27205	14359
ARC	aging	0.034384	0.0597015	0.0291649	349	12	201	GO:0007568	GO:BP	27205	3117
ARC	establishment of localization in cell	0.148997	0.0236686	0.0313341	349	52	2197	GO:0051649	GO:BP	27205	14650
ARC	carbohydrate derivative metabolic process	0.0888252	0.0297505	0.0335164	349	31	1042	GO:1901135	GO:BP	27205	22199
ARC	regulation of cellular response to growth factor stimulus	0.0429799	0.0479233	0.0348514	349	15	313	GO:0090287	GO:BP	27205	19192
ARC	response to oxygen levels	0.0515759	0.0414747	0.0356199	349	18	434	GO:0070482	GO:BP	27205	17073
ARC	positive regulation of smooth muscle cell proliferation	0.025788	0.079646	0.0374118	349	9	113	GO:0048661	GO:BP	27205	13659
ARC	heart contraction	0.0372493	0.0539419	0.037713	349	13	241	GO:0060047	GO:BP	27205	15141
ARC	primary metabolic process	0.595989	0.0157887	0.0383925	349	208	13174	GO:0044238	GO:BP	27205	11572
ARC	regulation of metal ion transport	0.0515759	0.0410959	0.0402494	349	18	438	GO:0010959	GO:BP	27205	4650
ARC	axonogenesis	0.0544413	0.039501	0.0407766	349	19	481	GO:0007409	GO:BP	27205	2976
ARC	cellular response to peptide	0.0487106	0.0428212	0.0409244	349	17	397	GO:1901653	GO:BP	27205	22627
ARC	retrograde trans-synaptic signaling	0.0114613	0.307692	0.0413589	349	4	13	GO:0098917	GO:BP	27205	20011
ARC	rhythmic process	0.0458453	0.0448179	0.0415459	349	16	357	GO:0048511	GO:BP	27205	13534
ARC	ERK1 and ERK2 cascade	0.0458453	0.0445682	0.0444808	349	16	359	GO:0070371	GO:BP	27205	17010
ARC	proton transmembrane transport	0.0286533	0.0689655	0.0450562	349	10	145	GO:1902600	GO:BP	27205	23418
ARC	purine ribonucleotide biosynthetic process	0.034384	0.0571429	0.0451778	349	12	210	GO:0009152	GO:BP	27205	3395
ARC	positive regulation of neuron differentiation	0.025788	0.0775862	0.0461948	349	9	116	GO:0045666	GO:BP	27205	12217
ARC	peptidyl-amino acid modification	0.0974212	0.0279146	0.0475729	349	34	1218	GO:0018193	GO:BP	27205	5557
ARC	forebrain development	0.0515759	0.0405405	0.0482052	349	18	444	GO:0030900	GO:BP	27205	7322
ARC	cytoplasm	0.708571	0.0213425	1.7921e-24	350	248	11620	GO:0005737	GO:CC	27262	309
ARC	synapse	0.234286	0.0488968	6.79554e-24	350	82	1677	GO:0045202	GO:CC	27262	2147
ARC	postsynapse	0.165714	0.0669746	1.02809e-22	350	58	866	GO:0098794	GO:CC	27262	3266
ARC	cell junction	0.268571	0.0409765	2.96122e-22	350	94	2294	GO:0030054	GO:CC	27262	871
ARC	neuron projection	0.217143	0.0465401	1.39599e-20	350	76	1633	GO:0043005	GO:CC	27262	1851
ARC	plasma membrane bounded cell projection	0.268571	0.037346	2.22191e-19	350	94	2517	GO:0120025	GO:CC	27262	3453
ARC	cell projection	0.274286	0.0366832	2.51545e-19	350	96	2617	GO:0042995	GO:CC	27262	1850
ARC	glutamatergic synapse	0.125714	0.0721311	5.55542e-18	350	44	610	GO:0098978	GO:CC	27262	3325
ARC	plasma membrane region	0.182857	0.0450704	3.42853e-16	350	64	1420	GO:0098590	GO:CC	27262	3226
ARC	somatodendritic compartment	0.154286	0.0482143	1.4532e-14	350	54	1120	GO:0036477	GO:CC	27262	1724
ARC	neuron to neuron synapse	0.1	0.072314	5.18235e-14	350	35	484	GO:0098984	GO:CC	27262	3331
ARC	synaptic membrane	0.1	0.0721649	5.52187e-14	350	35	485	GO:0097060	GO:CC	27262	2907
ARC	dendrite	0.125714	0.0549313	1.52272e-13	350	44	801	GO:0030425	GO:CC	27262	936
ARC	dendritic tree	0.125714	0.0547945	1.6664e-13	350	44	803	GO:0097447	GO:CC	27262	3014
ARC	organelle	0.794286	0.0171404	3.46184e-13	350	278	16219	GO:0043226	GO:CC	27262	1883
ARC	postsynaptic specialization	0.0942857	0.0702128	9.26513e-13	350	33	470	GO:0099572	GO:CC	27262	3384
ARC	intracellular anatomical structure	0.828571	0.0165667	2.24652e-12	350	290	17505	GO:0005622	GO:CC	27262	237
ARC	postsynaptic density	0.0885714	0.0722611	3.05542e-12	350	31	429	GO:0014069	GO:CC	27262	696
ARC	asymmetric synapse	0.0885714	0.0693512	9.29535e-12	350	31	447	GO:0032279	GO:CC	27262	1285
ARC	postsynaptic membrane	0.0771429	0.0813253	1.00853e-11	350	27	332	GO:0045211	GO:CC	27262	2148
ARC	cellular anatomical entity	0.962857	0.0147833	1.74398e-11	350	337	22796	GO:0110165	GO:CC	27262	3449
ARC	intracellular organelle	0.76	0.016739	6.49858e-10	350	266	15891	GO:0043229	GO:CC	27262	1886
ARC	axon	0.108571	0.0477987	1.21859e-09	350	38	795	GO:0030424	GO:CC	27262	935
ARC	membrane	0.557143	0.0189137	1.97032e-09	350	195	10310	GO:0016020	GO:CC	27262	722
ARC	presynapse	0.102857	0.0483871	3.29919e-09	350	36	744	GO:0098793	GO:CC	27262	3265
ARC	presynaptic membrane	0.0571429	0.0888889	4.57498e-09	350	20	225	GO:0042734	GO:CC	27262	1839
ARC	dendritic spine	0.0571429	0.0888889	4.57498e-09	350	20	225	GO:0043197	GO:CC	27262	1872
ARC	neuron spine	0.0571429	0.0865801	7.3929e-09	350	20	231	GO:0044309	GO:CC	27262	2068
ARC	membrane protein complex	0.128571	0.0373134	4.59923e-08	350	45	1206	GO:0098796	GO:CC	27262	3267
ARC	cell periphery	0.408571	0.0202894	1.59274e-07	350	143	7048	GO:0071944	GO:CC	27262	2801
ARC	neuronal cell body	0.0942857	0.0442359	2.48264e-07	350	33	746	GO:0043025	GO:CC	27262	1853
ARC	GABA-ergic synapse	0.04	0.112	2.62064e-07	350	14	125	GO:0098982	GO:CC	27262	3329
ARC	membrane-bounded organelle	0.705714	0.0164744	4.04828e-07	350	247	14993	GO:0043227	GO:CC	27262	1884
ARC	mitochondrial respirasome	0.0342857	0.133333	5.6224e-07	350	12	90	GO:0005746	GO:CC	27262	317
ARC	respiratory chain complex	0.0342857	0.133333	5.6224e-07	350	12	90	GO:0098803	GO:CC	27262	3273
ARC	cell body	0.0971429	0.0408654	1.02177e-06	350	34	832	GO:0044297	GO:CC	27262	2056
ARC	respirasome	0.0342857	0.122449	1.52119e-06	350	12	98	GO:0070469	GO:CC	27262	2505
ARC	intracellular membrane-bounded organelle	0.682857	0.0164623	1.84208e-06	350	239	14518	GO:0043231	GO:CC	27262	1888
ARC	plasma membrane	0.371429	0.0197959	8.67783e-06	350	130	6567	GO:0005886	GO:CC	27262	424
ARC	endomembrane system	0.268571	0.0219524	1.74853e-05	350	94	4282	GO:0012505	GO:CC	27262	689
ARC	perinuclear region of cytoplasm	0.0885714	0.0387016	1.7836e-05	350	31	801	GO:0048471	GO:CC	27262	2238
ARC	inner mitochondrial membrane protein complex	0.0371429	0.0866667	2.35552e-05	350	13	150	GO:0098800	GO:CC	27262	3271
ARC	Schaffer collateral - CA1 synapse	0.0342857	0.0895522	5.22153e-05	350	12	134	GO:0098685	GO:CC	27262	3252
ARC	presynaptic active zone	0.0314286	0.1	5.5583e-05	350	11	110	GO:0048786	GO:CC	27262	2249
ARC	transmembrane transporter complex	0.0571429	0.0510204	6.3641e-05	350	20	392	GO:1902495	GO:CC	27262	3621
ARC	organelle membrane	0.217143	0.0230303	7.66551e-05	350	76	3300	GO:0031090	GO:CC	27262	1048
ARC	nucleoplasm	0.24	0.0220472	9.6471e-05	350	84	3810	GO:0005654	GO:CC	27262	252
ARC	presynaptic active zone membrane	0.0228571	0.145455	0.000148644	350	8	55	GO:0048787	GO:CC	27262	2250
ARC	transporter complex	0.0571429	0.0479616	0.000168929	350	20	417	GO:1990351	GO:CC	27262	3868
ARC	postsynaptic specialization membrane	0.0342857	0.0774194	0.000252765	350	12	155	GO:0099634	GO:CC	27262	3390
ARC	bounding membrane of organelle	0.131429	0.0269479	0.000495825	350	46	1707	GO:0098588	GO:CC	27262	3225
ARC	cytoskeleton	0.16	0.0236987	0.00173907	350	56	2363	GO:0005856	GO:CC	27262	401
ARC	cell leading edge	0.0542857	0.0418502	0.00234294	350	19	454	GO:0031252	GO:CC	27262	1077
ARC	protein-containing complex	0.374286	0.0178913	0.00269024	350	131	7322	GO:0032991	GO:CC	27262	1343
ARC	anchoring junction	0.0714286	0.0343879	0.0028129	350	25	727	GO:0070161	GO:CC	27262	2447
ARC	sarcolemma	0.0314286	0.0635838	0.00478749	350	11	173	GO:0042383	GO:CC	27262	1785
ARC	excitatory synapse	0.0228571	0.0909091	0.00543432	350	8	88	GO:0060076	GO:CC	27262	2271
ARC	inhibitory synapse	0.0142857	0.185185	0.00657285	350	5	27	GO:0060077	GO:CC	27262	2272
ARC	plasma membrane protein complex	0.06	0.0362069	0.00696864	350	21	580	GO:0098797	GO:CC	27262	3268
ARC	contractile fiber	0.0371429	0.052	0.00711772	350	13	250	GO:0043292	GO:CC	27262	1906
ARC	cell projection membrane	0.0457143	0.0435967	0.00747264	350	16	367	GO:0031253	GO:CC	27262	1078
ARC	oxidoreductase complex	0.0257143	0.0737705	0.00884903	350	9	122	GO:1990204	GO:CC	27262	3808
ARC	dendritic shaft	0.02	0.1	0.0098262	350	7	70	GO:0043198	GO:CC	27262	1873
ARC	leading edge membrane	0.0314286	0.0588235	0.00985341	350	11	187	GO:0031256	GO:CC	27262	1081
ARC	Golgi apparatus	0.111429	0.0254735	0.0115206	350	39	1531	GO:0005794	GO:CC	27262	358
ARC	mitochondrial protein-containing complex	0.04	0.0463576	0.0123597	350	14	302	GO:0098798	GO:CC	27262	3269
ARC	respiratory chain complex I	0.0171429	0.12	0.0128317	350	6	50	GO:0045271	GO:CC	27262	2178
ARC	NADH dehydrogenase complex	0.0171429	0.12	0.0128317	350	6	50	GO:0030964	GO:CC	27262	1017
ARC	mitochondrial respiratory chain complex I	0.0171429	0.12	0.0128317	350	6	50	GO:0005747	GO:CC	27262	318
ARC	cell cortex	0.0428571	0.0437318	0.0128955	350	15	343	GO:0005938	GO:CC	27262	462
ARC	exocytic vesicle	0.0371429	0.0469314	0.0204582	350	13	277	GO:0070382	GO:CC	27262	2478
ARC	myofibril	0.0342857	0.05	0.021288	350	12	240	GO:0030016	GO:CC	27262	867
ARC	cell-cell junction	0.0542857	0.0355805	0.0214609	350	19	534	GO:0005911	GO:CC	27262	441
ARC	costamere	0.0114286	0.222222	0.0214773	350	4	18	GO:0043034	GO:CC	27262	1855
ARC	main axon	0.02	0.0886076	0.0215296	350	7	79	GO:0044304	GO:CC	27262	2063
ARC	membrane raft	0.0457143	0.039801	0.0220757	350	16	402	GO:0045121	GO:CC	27262	2137
ARC	membrane microdomain	0.0457143	0.0397022	0.0227251	350	16	403	GO:0098857	GO:CC	27262	3298
ARC	cytosol	0.228571	0.0193845	0.0243243	350	80	4127	GO:0005829	GO:CC	27262	380
ARC	hippocampal mossy fiber to CA3 synapse	0.0171429	0.107143	0.0245772	350	6	56	GO:0098686	GO:CC	27262	3253
ARC	transport vesicle	0.0457143	0.0385542	0.0319304	350	16	415	GO:0030133	GO:CC	27262	912
ARC	postsynaptic density membrane	0.0228571	0.0695652	0.0370682	350	8	115	GO:0098839	GO:CC	27262	3287
ARC	transport vesicle membrane	0.0314286	0.0502283	0.0407427	350	11	219	GO:0030658	GO:CC	27262	950
ARC	coated vesicle membrane	0.0228571	0.0683761	0.0418006	350	8	117	GO:0030662	GO:CC	27262	954
ARC	synaptic vesicle	0.0342857	0.0465116	0.0421387	350	12	258	GO:0008021	GO:CC	27262	488
ARC	cytochrome complex	0.0142857	0.125	0.0467261	350	5	40	GO:0070069	GO:CC	27262	2430
ARC	astrocyte projection	0.0114286	0.181818	0.0493006	350	4	22	GO:0097449	GO:CC	27262	3016
ARC	protein binding	0.712209	0.0233534	2.7404e-26	344	245	10491	GO:0005515	GO:MF	25177	1496
ARC	binding	0.866279	0.0182867	1.0662e-17	344	298	16296	GO:0005488	GO:MF	25177	1484
ARC	ion binding	0.415698	0.023917	6.54775e-11	344	143	5979	GO:0043167	GO:MF	25177	5760
ARC	oxidoreduction-driven active transmembrane transporter activity	0.0290698	0.322581	3.028e-09	344	10	31	GO:0015453	GO:MF	25177	2571
ARC	enzyme binding	0.212209	0.0315607	3.75398e-09	344	73	2313	GO:0019899	GO:MF	25177	3754
ARC	cation binding	0.30814	0.0250354	3.89168e-08	344	106	4234	GO:0043169	GO:MF	25177	5762
ARC	primary active transmembrane transporter activity	0.0465116	0.114286	4.25748e-08	344	16	140	GO:0015399	GO:MF	25177	2532
ARC	electron transfer activity	0.0319767	0.207547	5.33965e-08	344	11	53	GO:0009055	GO:MF	25177	2138
ARC	cytoskeletal protein binding	0.122093	0.041543	7.13199e-08	344	42	1011	GO:0008092	GO:MF	25177	1548
ARC	transporter activity	0.130814	0.0384615	1.77238e-07	344	45	1170	GO:0005215	GO:MF	25177	1358
ARC	metal ion binding	0.296512	0.0246854	2.35025e-07	344	102	4132	GO:0046872	GO:MF	25177	6281
ARC	transmembrane transporter activity	0.119186	0.038282	1.31767e-06	344	41	1071	GO:0022857	GO:MF	25177	3819
ARC	PDZ domain binding	0.0377907	0.110169	3.91409e-06	344	13	118	GO:0030165	GO:MF	25177	3872
ARC	active transmembrane transporter activity	0.0668605	0.0573566	3.95135e-06	344	23	401	GO:0022804	GO:MF	25177	3792
ARC	protein domain specific binding	0.0988372	0.0416157	4.30934e-06	344	34	817	GO:0019904	GO:MF	25177	3759
ARC	NADH dehydrogenase (ubiquinone) activity	0.0174419	0.352941	3.0045e-05	344	6	17	GO:0008137	GO:MF	25177	1577
ARC	NADH dehydrogenase (quinone) activity	0.0174419	0.333333	4.455e-05	344	6	18	GO:0050136	GO:MF	25177	7476
ARC	monoatomic ion transmembrane transporter activity	0.0843023	0.0417867	5.10357e-05	344	29	694	GO:0015075	GO:MF	25177	2306
ARC	NADH dehydrogenase activity	0.0174419	0.285714	0.00012579	344	6	21	GO:0003954	GO:MF	25177	470
ARC	NAD(P)H dehydrogenase (quinone) activity	0.0174419	0.285714	0.00012579	344	6	21	GO:0003955	GO:MF	25177	471
ARC	chromatin binding	0.0755814	0.0421394	0.000201439	344	26	617	GO:0003682	GO:MF	25177	328
ARC	inorganic cation transmembrane transporter activity	0.0668605	0.0438931	0.000473362	344	23	524	GO:0022890	GO:MF	25177	3841
ARC	monoatomic cation transmembrane transporter activity	0.0697674	0.0424028	0.000505516	344	24	566	GO:0008324	GO:MF	25177	1662
ARC	cell adhesion molecule binding	0.0465116	0.0547945	0.00134727	344	16	292	GO:0050839	GO:MF	25177	7987
ARC	oxidoreductase activity, acting on NAD(P)H, quinone or similar compound as acceptor	0.0174419	0.166667	0.00379857	344	6	36	GO:0016655	GO:MF	25177	2896
ARC	active monoatomic ion transmembrane transporter activity	0.0377907	0.0599078	0.00441814	344	13	217	GO:0022853	GO:MF	25177	3816
ARC	inorganic molecular entity transmembrane transporter activity	0.0697674	0.037325	0.00442302	344	24	643	GO:0015318	GO:MF	25177	2484
ARC	actin binding	0.0552326	0.0419426	0.00778959	344	19	453	GO:0003779	GO:MF	25177	361
ARC	nucleoside-triphosphatase regulator activity	0.0552326	0.0418502	0.00803021	344	19	454	GO:0060589	GO:MF	25177	8475
ARC	GTPase regulator activity	0.0552326	0.0418502	0.00803021	344	19	454	GO:0030695	GO:MF	25177	4018
ARC	scaffold protein binding	0.0232558	0.0952381	0.00875888	344	8	84	GO:0097110	GO:MF	25177	9157
ARC	identical protein binding	0.162791	0.0239931	0.0104221	344	56	2334	GO:0042802	GO:MF	25177	5683
ARC	enzyme regulator activity	0.104651	0.0285261	0.0117682	344	36	1262	GO:0030234	GO:MF	25177	3885
ARC	oxidoreductase activity, acting on NAD(P)H	0.0203488	0.1	0.0212025	344	7	70	GO:0016651	GO:MF	25177	2893
ARC	molecular function regulator activity	0.145349	0.0242131	0.024116	344	50	2065	GO:0098772	GO:MF	25177	9275
ARC	structural constituent of synapse	0.0145349	0.151515	0.0354675	344	5	33	GO:0098918	GO:MF	25177	9286
ARC	cytochrome-c oxidase activity	0.00872093	0.428571	0.0375973	344	3	7	GO:0004129	GO:MF	25177	614
ARC	transcription factor binding	0.0639535	0.0342146	0.0376195	344	22	643	GO:0008134	GO:MF	25177	1575
ARC	zinc ion binding	0.0697674	0.0320856	0.0484475	344	24	748	GO:0008270	GO:MF	25177	1641
ARC	Ventricular preexcitation	0.084507	0.428571	7.16126e-09	142	12	28	HP:0004309	HP	4965	3010
ARC	Mitochondrial inheritance	0.0704225	0.588235	8.10553e-09	142	10	17	HP:0001427	HP	4965	1069
ARC	Centrocecal scotoma	0.0633803	0.692308	1.1955e-08	142	9	13	HP:0000576	HP	4965	445
ARC	Leber optic atrophy	0.056338	0.8	2.92357e-08	142	8	10	HP:0001112	HP	4965	872
ARC	Retinal arterial tortuosity	0.056338	0.666667	3.06328e-07	142	8	12	HP:0000631	HP	4965	491
ARC	Central retinal vessel vascular tortuosity	0.056338	0.666667	3.06328e-07	142	8	12	HP:0007768	HP	4965	4955
ARC	Mitochondrial respiratory chain defects	0.0633803	0.45	2.36679e-06	142	9	20	HP:0200125	HP	4965	16010
ARC	Ragged-red muscle fibers	0.084507	0.266667	4.46041e-06	142	12	45	HP:0003200	HP	4965	2308
ARC	Arterial tortuosity	0.0633803	0.391304	1.07017e-05	142	9	23	HP:0005116	HP	4965	3473
ARC	Wolff-Parkinson-White syndrome	0.0633803	0.391304	1.07017e-05	142	9	23	HP:0001716	HP	4965	1255
ARC	Polyneuropathy	0.0915493	0.209677	2.28609e-05	142	13	62	HP:0001271	HP	4965	968
ARC	Recurrent paroxysmal headache	0.0633803	0.36	2.54788e-05	142	9	25	HP:0002331	HP	4965	1711
ARC	Retinal telangiectasia	0.0633803	0.346154	3.80275e-05	142	9	26	HP:0007763	HP	4965	4952
ARC	Vascular tortuosity	0.0633803	0.346154	3.80275e-05	142	9	26	HP:0004948	HP	4965	3387
ARC	Episodic vomiting	0.0774648	0.244444	5.80887e-05	142	11	45	HP:0002572	HP	4965	1859
ARC	Focal-onset seizure	0.190141	0.0915254	7.68942e-05	142	27	295	HP:0007359	HP	4965	4701
ARC	Short attention span	0.232394	0.0785714	8.21096e-05	142	33	420	HP:0000736	HP	4965	573
ARC	Stroke-like episode	0.056338	0.380952	0.000101195	142	8	21	HP:0002401	HP	4965	1758
ARC	Autistic behavior	0.267606	0.0707635	0.000104746	142	38	537	HP:0000729	HP	4965	568
ARC	Mixed demyelinating and axonal polyneuropathy	0.0422535	0.6	0.000174409	142	6	10	HP:0007327	HP	4965	4683
ARC	Multiple glomerular cysts	0.0422535	0.6	0.000174409	142	6	10	HP:0100611	HP	4965	15607
ARC	Hypotonia	0.56338	0.0456361	0.000316641	142	80	1753	HP:0001252	HP	4965	953
ARC	Blurred vision	0.0704225	0.238095	0.000332377	142	10	42	HP:0000622	HP	4965	485
ARC	Widened cerebral subarachnoid space	0.0422535	0.545455	0.000374693	142	6	11	HP:0012766	HP	4965	9156
ARC	Low plasma citrulline	0.0422535	0.545455	0.000374693	142	6	11	HP:0003572	HP	4965	2568
ARC	Slow decrease in visual acuity	0.0633803	0.272727	0.000395656	142	9	33	HP:0007924	HP	4965	5033
ARC	Behavioral abnormality	0.577465	0.0444444	0.000648691	142	82	1845	HP:0000708	HP	4965	551
ARC	Encephalopathy	0.176056	0.0856164	0.000965659	142	25	292	HP:0001298	HP	4965	986
ARC	Distal peripheral sensory neuropathy	0.0422535	0.461538	0.00132717	142	6	13	HP:0007067	HP	4965	4572
ARC	Progressive sensorineural hearing impairment	0.0633803	0.236842	0.00148028	142	9	38	HP:0000408	HP	4965	316
ARC	Abnormal muscle physiology	0.683099	0.0404167	0.00157398	142	97	2400	HP:0011804	HP	4965	8210
ARC	Abnormal mitochondria in muscle tissue	0.0633803	0.230769	0.001878	142	9	39	HP:0008316	HP	4965	5260
ARC	Arrhythmia	0.225352	0.0700219	0.00197932	142	32	457	HP:0011675	HP	4965	8082
ARC	Abnormality of cardiovascular system electrophysiology	0.239437	0.0674603	0.00200132	142	34	504	HP:0030956	HP	4965	11043
ARC	Postural tremor	0.0774648	0.174603	0.00226587	142	11	63	HP:0002174	HP	4965	1602
ARC	Concentric hypertrophic cardiomyopathy	0.0422535	0.428571	0.00226808	142	6	14	HP:0005157	HP	4965	3494
ARC	Abnormality of the musculature	0.746479	0.0385035	0.00235174	142	106	2753	HP:0003011	HP	4965	2177
ARC	Bulbar signs	0.0633803	0.225	0.00236484	142	9	40	HP:0002483	HP	4965	1800
ARC	Infantile spasms	0.105634	0.123967	0.00249089	142	15	121	HP:0012469	HP	4965	8861
ARC	Bilateral tonic-clonic seizure	0.183099	0.0790274	0.00262448	142	26	329	HP:0002069	HP	4965	1521
ARC	Abnormality of Krebs cycle metabolism	0.0422535	0.4	0.00369151	142	6	15	HP:0000816	HP	4965	634
ARC	Abnormal muscle fiber morphology	0.147887	0.0893617	0.00445712	142	21	235	HP:0004303	HP	4965	3005
ARC	Autosomal dominant inheritance	0.591549	0.0422535	0.00446116	142	84	1988	HP:0000006	HP	4965	5
ARC	Mitochondrial myopathy	0.0704225	0.181818	0.00480607	142	10	55	HP:0003737	HP	4965	2647
ARC	Abnormal muscle tone	0.605634	0.0417071	0.00513661	142	86	2062	HP:0003808	HP	4965	2689
ARC	Ventricular arrhythmia	0.133803	0.0954774	0.0053005	142	19	199	HP:0004308	HP	4965	3009
ARC	Epileptic spasm	0.119718	0.104294	0.00552898	142	17	163	HP:0011097	HP	4965	7519
ARC	Retinal vascular tortuosity	0.0704225	0.178571	0.00570944	142	10	56	HP:0012841	HP	4965	9231
ARC	Abnormal circulating non-proteinogenic amino acid concentration	0.0492958	0.291667	0.00575823	142	7	24	HP:0033109	HP	4965	13102
ARC	Stuttering	0.0422535	0.375	0.005768	142	6	16	HP:0025268	HP	4965	9711
ARC	Abnormal circulating citrulline concentration	0.0422535	0.375	0.005768	142	6	16	HP:0011965	HP	4965	8367
ARC	Aplasia/Hypoplasia of the cerebral white matter	0.0422535	0.375	0.005768	142	6	16	HP:0012429	HP	4965	8823
ARC	Abnormal nervous system physiology	0.873239	0.0349591	0.00758088	142	124	3547	HP:0012638	HP	4965	9029
ARC	Bipolar affective disorder	0.056338	0.228571	0.00833441	142	8	35	HP:0007302	HP	4965	4674
ARC	Episodic respiratory distress	0.0422535	0.352941	0.00870534	142	6	17	HP:0004885	HP	4965	3339
ARC	Abnormal skeletal muscle morphology	0.542254	0.0431614	0.00903138	142	77	1784	HP:0011805	HP	4965	8211
ARC	Impairment in personality functioning	0.28169	0.057971	0.00903464	142	40	690	HP:0031466	HP	4965	11526
ARC	Cardiac conduction abnormality	0.112676	0.105263	0.00979371	142	16	152	HP:0031546	HP	4965	11602
ARC	Abnormal cardiac ventricle morphology	0.274648	0.0583832	0.0104385	142	39	668	HP:0001713	HP	4965	1253
ARC	Abnormal cerebral vascular morphology	0.169014	0.0769231	0.0114205	142	24	312	HP:0100659	HP	4965	15652
ARC	Progressive hearing impairment	0.0633803	0.1875	0.0119348	142	9	48	HP:0001730	HP	4965	1262
ARC	Cerebral visual impairment	0.112676	0.103226	0.0126445	142	16	155	HP:0100704	HP	4965	15690
ARC	Motor seizure	0.183099	0.0726257	0.0127898	142	26	358	HP:0020219	HP	4965	9459
ARC	Impaired visuospatial constructive cognition	0.0492958	0.259259	0.0137475	142	7	27	HP:0010794	HP	4965	7228
ARC	Vitiligo	0.0492958	0.259259	0.0137475	142	7	27	HP:0001045	HP	4965	817
ARC	Central scotoma	0.0633803	0.18	0.0169815	142	9	50	HP:0000603	HP	4965	468
ARC	Segmental peripheral demyelination/remyelination	0.0422535	0.315789	0.0182015	142	6	19	HP:0003481	HP	4965	2512
ARC	Fluctuations in consciousness	0.0422535	0.315789	0.0182015	142	6	19	HP:0007159	HP	4965	4611
ARC	Nausea and vomiting	0.232394	0.0621469	0.0184039	142	33	531	HP:0002017	HP	4965	1478
ARC	Abnormality of eye movement	0.521127	0.0431235	0.0184614	142	74	1716	HP:0000496	HP	4965	379
ARC	Abnormal head blood vessel morphology	0.0774648	0.141026	0.0198128	142	11	78	HP:3000036	HP	4965	16639
ARC	Abnormal retinal artery morphology	0.0704225	0.153846	0.0230324	142	10	65	HP:0000630	HP	4965	490
ARC	Increased CSF protein concentration	0.0633803	0.173077	0.0237508	142	9	52	HP:0002922	HP	4965	2120
ARC	Neurological speech impairment	0.492958	0.0437774	0.0244168	142	70	1599	HP:0002167	HP	4965	1595
ARC	Abnormal speech prosody	0.0422535	0.3	0.0253936	142	6	20	HP:0031434	HP	4965	11495
ARC	Abnormal CSF protein concentration	0.0633803	0.166667	0.0326989	142	9	54	HP:0025456	HP	4965	9886
ARC	Mania	0.056338	0.190476	0.0352803	142	8	42	HP:0100754	HP	4965	15734
ARC	Motor delay	0.316901	0.051963	0.0359008	142	45	866	HP:0001270	HP	4965	967
ARC	Type I diabetes mellitus	0.0633803	0.163636	0.0381561	142	9	55	HP:0100651	HP	4965	15646
ARC	Abnormality of higher mental function	0.704225	0.037679	0.0393133	142	100	2654	HP:0011446	HP	4965	7856
ARC	Constipation	0.197183	0.0651163	0.0430122	142	28	430	HP:0002019	HP	4965	1480
ARC	Psychotic mentation	0.0422535	0.272727	0.0466228	142	6	22	HP:0001345	HP	4965	1019
ARC	Diabetic cardiomyopathy	0.113772	0.0931373	6.79302e-07	167	19	204	KEGG:05415	KEGG	8947	485
ARC	Huntington disease	0.125749	0.07	1.59683e-05	167	21	300	KEGG:05016	KEGG	8947	407
ARC	Oxidative phosphorylation	0.0838323	0.105263	1.59905e-05	167	14	133	KEGG:00190	KEGG	8947	18
ARC	Pathways of neurodegeneration - multiple diseases	0.149701	0.0533049	0.000175383	167	25	469	KEGG:05022	KEGG	8947	410
ARC	Chemical carcinogenesis - reactive oxygen species	0.0958084	0.0727273	0.000319956	167	16	220	KEGG:05208	KEGG	8947	453
ARC	Thermogenesis	0.0958084	0.0701754	0.000507978	167	16	228	KEGG:04714	KEGG	8947	343
ARC	Parkinson disease	0.101796	0.0648855	0.000729577	167	17	262	KEGG:05012	KEGG	8947	405
ARC	Alzheimer disease	0.125749	0.0552632	0.000737374	167	21	380	KEGG:05010	KEGG	8947	404
ARC	Prion disease	0.101796	0.0639098	0.000892072	167	17	266	KEGG:05020	KEGG	8947	409
ARC	Retrograde endocannabinoid signaling	0.0718563	0.0821918	0.00168863	167	12	146	KEGG:04723	KEGG	8947	347
ARC	Amyotrophic lateral sclerosis	0.113772	0.0519126	0.00490764	167	19	366	KEGG:05014	KEGG	8947	406
ARC	Calcium signaling pathway	0.0838323	0.0583333	0.0151997	167	14	240	KEGG:04020	KEGG	8947	245
ARC	Insulin secretion	0.0479042	0.0930233	0.019038	167	8	86	KEGG:04911	KEGG	8947	361
ARC	mmu-miR-223-3p	0.129555	0.10356	2.93221e-06	247	32	309	MIRNA:mmu-miR-223-3p	MIRNA	7220	1339
ARC	mmu-miR-7b-5p	0.161943	0.0883002	3.91732e-06	247	40	453	MIRNA:mmu-miR-7b-5p	MIRNA	7220	1993
ARC	mmu-miR-17-5p	0.125506	0.0748792	0.00563192	247	31	414	MIRNA:mmu-miR-17-5p	MIRNA	7220	1190
ARC	mmu-miR-425-5p	0.117409	0.0717822	0.0222871	247	29	404	MIRNA:mmu-miR-425-5p	MIRNA	7220	1615
ARC	mmu-miR-324-3p	0.105263	0.0740741	0.0311819	247	26	351	MIRNA:mmu-miR-324-3p	MIRNA	7220	1499
ARC	mmu-miR-15a-5p	0.137652	0.0656371	0.0324762	247	34	518	MIRNA:mmu-miR-15a-5p	MIRNA	7220	1185
ARC	Respiratory electron transport	0.0568182	0.111111	0.00558403	176	10	90	REAC:R-MMU-611105	REAC	8362	1288
ARC	Respiratory electron transport, ATP synthesis by chemiosmotic coupling, and heat production by uncoupling proteins.	0.0625	0.0973451	0.00751639	176	11	113	REAC:R-MMU-163200	REAC	8362	1289
ARC	Response to elevated platelet cytosolic Ca2+	0.0625	0.0964912	0.00816905	176	11	114	REAC:R-MMU-76005	REAC	8362	1290
ARC	The citric acid (TCA) cycle and respiratory electron transport	0.0738636	0.081761	0.00898336	176	13	159	REAC:R-MMU-1428517	REAC	8362	1554
ARC	Platelet degranulation	0.0568182	0.0909091	0.0318588	176	10	110	REAC:R-MMU-114608	REAC	8362	1054
ARC	Factor: Sp1; motif: GGNGGGGGNGGGGGMGGGGCNGGG; match class: 1	0.583569	0.0277441	4.44862e-18	353	206	7425	TF:M10375_1	TF	21866	3227
ARC	Factor: MOVO-B; motif: GNGGGGG; match class: 1	0.345609	0.0371725	4.33244e-17	353	122	3282	TF:M01104_1	TF	21866	2111
ARC	Factor: CTCF; motif: NAGGGGGCGCNNKNNNN; match class: 1	0.66289	0.024952	5.33411e-16	353	234	9378	TF:M08995_1	TF	21866	613
ARC	Factor: Sp1; motif: GGNGGGGGNGGGGGMGGGGCNGGG	0.72238	0.0236549	1.22824e-15	353	255	10780	TF:M10375	TF	21866	3226
ARC	Factor: MOVO-B; motif: GNGGGGG	0.577904	0.026618	2.00322e-15	353	204	7664	TF:M01104	TF	21866	2110
ARC	Factor: ZF5; motif: GYCGCGCARNGCNN	0.665722	0.024659	2.16481e-15	353	235	9530	TF:M02933	TF	21866	3838
ARC	Factor: AP2; motif: GCCYGSGGSN	0.558074	0.0270196	3.1323e-15	353	197	7291	TF:M08867	TF	21866	116
ARC	Factor: WT1; motif: CGCCCCCNCN	0.566572	0.0265076	1.23408e-14	353	200	7545	TF:M02036	TF	21866	3742
ARC	Factor: SP1:SP3; motif: CCSCCCCCYCC	0.524079	0.0275831	1.35014e-14	353	185	6707	TF:M01219	TF	21866	3220
ARC	Factor: KROX; motif: CCCGCCCCCRCCCC	0.487252	0.0286333	1.47442e-14	353	172	6007	TF:M00982	TF	21866	1854
ARC	Factor: Egr-1; motif: GCGGGGGCGG	0.492918	0.0284593	1.47638e-14	353	174	6114	TF:M07354	TF	21866	834
ARC	Factor: Kaiso; motif: GCMGGGRGCRGS; match class: 1	0.475921	0.0286201	5.60428e-14	353	168	5870	TF:M03876_1	TF	21866	1819
ARC	Factor: WT1; motif: NNGGGNGGGSGN	0.572238	0.0260477	5.63287e-14	353	202	7755	TF:M07436	TF	21866	3738
ARC	Factor: ZF5; motif: NRNGNGCGCGCWN; match class: 1	0.728045	0.0228953	1.19668e-13	353	257	11225	TF:M00333_1	TF	21866	3827
ARC	Factor: ZBP89; motif: CCCCKCCCCCNN	0.586402	0.0255178	1.55933e-13	353	207	8112	TF:M07397	TF	21866	3778
ARC	Factor: WT1; motif: CGCCCCCNCN; match class: 1	0.314448	0.0351823	2.90315e-13	353	111	3155	TF:M02036_1	TF	21866	3743
ARC	Factor: AP-2alpha; motif: NGCCYSNNGSN	0.487252	0.0277733	3.61792e-13	353	172	6193	TF:M01857	TF	21866	98
ARC	Factor: WT1; motif: GNGGGGGCGGGG; match class: 1	0.274788	0.0378315	4.92798e-13	353	97	2564	TF:M03893_1	TF	21866	3745
ARC	Factor: WT1; motif: GNGGGGGCGGGG	0.509915	0.0269703	7.43927e-13	353	180	6674	TF:M03893	TF	21866	3744
ARC	Factor: AP-2; motif: GSCCSCRGGCNRNRNN	0.512748	0.0267831	1.17462e-12	353	181	6758	TF:M00800	TF	21866	114
ARC	Factor: ZF5; motif: NRNGNGCGCGCWN	0.849858	0.0206768	1.75567e-12	353	300	14509	TF:M00333	TF	21866	3826
ARC	Factor: WT1; motif: NGCGGGGGGGTSMMCYN	0.436261	0.028866	1.81896e-12	353	154	5335	TF:M05599	TF	21866	3734
ARC	Factor: E2F-3; motif: GGCGGGN; match class: 1	0.518414	0.0264527	2.51945e-12	353	183	6918	TF:M02089_1	TF	21866	753
ARC	Factor: Sp1; motif: NGGGGCGGGGN; match class: 1	0.390935	0.0303363	2.97842e-12	353	138	4549	TF:M07395_1	TF	21866	3231
ARC	Factor: WT1; motif: NNGGGNGGGSGN; match class: 1	0.359773	0.031592	3.61377e-12	353	127	4020	TF:M07436_1	TF	21866	3739
ARC	Factor: EGR; motif: CGCCCCCGCNN	0.461756	0.0278632	3.67744e-12	353	163	5850	TF:M08878	TF	21866	860
ARC	Factor: BEN; motif: CAGCGRNV; match class: 1	0.750708	0.0220338	4.3156e-12	353	265	12027	TF:M01240_1	TF	21866	279
ARC	Factor: FOXN4; motif: NNWANNCGWMCGCGTCNNNNMT; match class: 1	0.78187	0.0215574	4.81018e-12	353	276	12803	TF:M04662_1	TF	21866	1157
ARC	Factor: RNF96; motif: BCCCGCRGCC	0.487252	0.0269889	6.71979e-12	353	172	6373	TF:M01199	TF	21866	2914
ARC	Factor: Egr-1; motif: GCGGGGGCGG	0.413598	0.0290605	1.05666e-11	353	146	5024	TF:M01873	TF	21866	836
ARC	Factor: E2F-1; motif: GNGGGCGGGRMN; match class: 1	0.688385	0.0228019	1.54827e-11	353	243	10657	TF:M10209_1	TF	21866	729
ARC	Factor: ZF5; motif: GSGCGCGR; match class: 1	0.747875	0.0218272	2.62876e-11	353	264	12095	TF:M00716_1	TF	21866	3825
ARC	Factor: ZF5; motif: GSGCGCGR	0.855524	0.0203093	2.81323e-11	353	302	14870	TF:M00716	TF	21866	3824
ARC	Factor: Sp1; motif: NNGGGGCGGGGNN	0.609065	0.0239768	3.65415e-11	353	215	8967	TF:M00932	TF	21866	3232
ARC	Factor: Sp1; motif: GGGGCGGGGC	0.594901	0.0241796	4.77991e-11	353	210	8685	TF:M00931	TF	21866	3236
ARC	Factor: AP-2alpha; motif: NGCCYSNNGSN; match class: 1	0.23796	0.038078	6.3169e-11	353	84	2206	TF:M01857_1	TF	21866	99
ARC	Factor: GKLF; motif: NNRRGRRNGNSNNN; match class: 1	0.583569	0.0243154	6.83248e-11	353	206	8472	TF:M07040_1	TF	21866	1349
ARC	Factor: FOXN4; motif: NNWANNCGWMCGCGTCNNNNMT	0.892351	0.0196494	1.24781e-10	353	315	16031	TF:M04662	TF	21866	1156
ARC	Factor: AP-2beta; motif: GCNNNGGSCNGVGGGN	0.410765	0.0282706	1.47228e-10	353	145	5129	TF:M01858	TF	21866	100
ARC	Factor: Sp5; motif: RNGGRGGNGGRGNNGGGGGAGGRG; match class: 1	0.21813	0.0393862	1.72453e-10	353	77	1955	TF:M10376_1	TF	21866	3261
ARC	Factor: Sp1; motif: CCCCGCCCCN	0.594901	0.0238908	1.97793e-10	353	210	8790	TF:M00933	TF	21866	3228
ARC	Factor: MAZ; motif: GGGGAGGG; match class: 1	0.288952	0.0334865	2.02374e-10	353	102	3046	TF:M00649_1	TF	21866	2025
ARC	Factor: ZF5; motif: GYCGCGCARNGCNN; match class: 1	0.447592	0.0269993	2.65811e-10	353	158	5852	TF:M02933_1	TF	21866	3839
ARC	Factor: WT1; motif: SMCNCCNSC; match class: 1	0.379603	0.0291114	2.71958e-10	353	134	4603	TF:M01118_1	TF	21866	3741
ARC	Factor: Sp1; motif: NGGGGGCGGGGYN; match class: 1	0.359773	0.0298192	3.03446e-10	353	127	4259	TF:M00196_1	TF	21866	3235
ARC	Factor: CTCF; motif: NAGGGGGCGCNNKNNNN	0.830028	0.0203854	3.44463e-10	353	293	14373	TF:M08995	TF	21866	612
ARC	Factor: MAZ; motif: NKGGGAGGGGRGGR; match class: 1	0.354108	0.0299688	3.67929e-10	353	125	4171	TF:M02023_1	TF	21866	2027
ARC	Factor: E2F; motif: GGCGSG; match class: 1	0.507082	0.0253433	5.91334e-10	353	179	7063	TF:M00803_1	TF	21866	775
ARC	Factor: Sp5; motif: RNGGRGGNGGRGNNGGGGGAGGRG	0.390935	0.0283892	6.70935e-10	353	138	4861	TF:M10376	TF	21866	3260
ARC	Factor: BCL6B; motif: NNNNCCGCCCCWNNNN; match class: 1	0.577904	0.0238318	1.0916e-09	353	204	8560	TF:M02844_1	TF	21866	263
ARC	Factor: SP1; motif: GGGGYGGGGNS	0.509915	0.0250941	1.24101e-09	353	180	7173	TF:M01303	TF	21866	3224
ARC	Factor: GKLF; motif: NNNRGGNGNGGSN; match class: 1	0.688385	0.0220749	1.38778e-09	353	243	11008	TF:M07289_1	TF	21866	1351
ARC	Factor: Osx; motif: CCNCCCCCNNN	0.458924	0.0262136	1.40018e-09	353	162	6180	TF:M07329	TF	21866	2550
ARC	Factor: Kaiso; motif: SARNYCTCGCGAGAN; match class: 1	0.643059	0.0227182	1.49392e-09	353	227	9992	TF:M10276_1	TF	21866	3791
ARC	Factor: Sp1; motif: CCCCGCCCCN; match class: 1	0.339943	0.0299177	1.67375e-09	353	120	4011	TF:M00933_1	TF	21866	3229
ARC	Factor: GKLF; motif: NNNRGGNGNGGSN	0.86119	0.019811	1.73734e-09	353	304	15345	TF:M07289	TF	21866	1350
ARC	Factor: E2F; motif: GGCGSG	0.66289	0.0223923	1.80678e-09	353	234	10450	TF:M00803	TF	21866	774
ARC	Factor: AP-2; motif: MKCCCSCNGGCG; match class: 1	0.320113	0.0306982	2.02481e-09	353	113	3681	TF:M00189_1	TF	21866	119
ARC	Factor: E2F-3; motif: GGCGGGN	0.699717	0.0218526	2.09122e-09	353	247	11303	TF:M02089	TF	21866	752
ARC	Factor: CKROX; motif: SCCCTCCCC; match class: 1	0.212465	0.0379363	2.52967e-09	353	75	1977	TF:M01175_1	TF	21866	477
ARC	Factor: ZBP89; motif: CCCCKCCCCCNN; match class: 1	0.331445	0.0300771	2.63929e-09	353	117	3890	TF:M07397_1	TF	21866	3779
ARC	Factor: KLF3; motif: NNNNNNGGGCGGGGCNNGN	0.515581	0.0247619	2.92295e-09	353	182	7350	TF:M10278	TF	21866	1834
ARC	Factor: Sp1; motif: NGGGGCGGGGN	0.600567	0.0231643	4.41145e-09	353	212	9152	TF:M07395	TF	21866	3230
ARC	Factor: KROX; motif: CCCGCCCCCRCCCC; match class: 1	0.215297	0.0371638	4.79393e-09	353	76	2045	TF:M00982_1	TF	21866	1855
ARC	Factor: Kaiso; motif: GCMGGGRGCRGS	0.688385	0.0217586	9.54485e-09	353	243	11168	TF:M03876	TF	21866	1818
ARC	Factor: Egr-1; motif: NNGCGKGGGCGGGG	0.356941	0.0285455	9.5463e-09	353	126	4414	TF:M10213	TF	21866	832
ARC	Factor: MAZ; motif: NKGGGAGGGGRGGR	0.541076	0.0239709	1.04679e-08	353	191	7968	TF:M02023	TF	21866	2026
ARC	Factor: Sp1; motif: NGGGGGCGGGGYN	0.580737	0.0232505	1.3211e-08	353	205	8817	TF:M00196	TF	21866	3234
ARC	Factor: Sp1; motif: NNGGGGCGGGGNN; match class: 1	0.354108	0.0285128	1.32739e-08	353	125	4384	TF:M00932_1	TF	21866	3233
ARC	Factor: E2F-1; motif: NNNSSCGCSAANN; match class: 1	0.339943	0.0289785	1.51152e-08	353	120	4141	TF:M07250_1	TF	21866	737
ARC	Factor: Sp1; motif: GGGGCGGGGC; match class: 1	0.342776	0.028789	1.83872e-08	353	121	4203	TF:M00931_1	TF	21866	3237
ARC	Factor: WT1; motif: SMCNCCNSC	0.546742	0.0237392	1.83963e-08	353	193	8130	TF:M01118	TF	21866	3740
ARC	Factor: BTEB2; motif: RGGGNGKGGN	0.521246	0.0241533	2.15379e-08	353	184	7618	TF:M07277	TF	21866	332
ARC	Factor: Egr-1; motif: GCGGGGGCGG; match class: 1	0.215297	0.0359168	2.52889e-08	353	76	2116	TF:M07354_1	TF	21866	835
ARC	Factor: BTEB2; motif: GNAGGGGGNGGGSSNN	0.385269	0.027249	2.55055e-08	353	136	4991	TF:M03814	TF	21866	330
ARC	Factor: EGR; motif: CGCCCCCGCNN; match class: 1	0.1983	0.0375738	2.58302e-08	353	70	1863	TF:M08878_1	TF	21866	861
ARC	Factor: Egr1; motif: NCCGCCCCCGCANN	0.29745	0.030303	4.11463e-08	353	105	3465	TF:M02744	TF	21866	824
ARC	Factor: Wt1; motif: NNCCTCCCCCACNN	0.436261	0.0256667	5.1122e-08	353	154	6000	TF:M12438	TF	21866	3736
ARC	Factor: SP2; motif: GNNGGGGGCGGGGSN	0.492918	0.0244519	5.30349e-08	353	174	7116	TF:M03807	TF	21866	3242
ARC	Factor: ZNF151; motif: GGSGGNGGGGGAGGGGMGG	0.31728	0.0293117	5.32848e-08	353	112	3821	TF:M10412	TF	21866	2094
ARC	Factor: RNF96; motif: BCCCGCRGCC; match class: 1	0.252125	0.0325292	6.22695e-08	353	89	2736	TF:M01199_1	TF	21866	2915
ARC	Factor: BEN; motif: CAGCGRNV	0.883853	0.0191729	6.41061e-08	353	312	16273	TF:M01240	TF	21866	278
ARC	Factor: AP-2; motif: SNNNCCNCAGGCN	0.492918	0.0244005	6.41711e-08	353	174	7131	TF:M00915	TF	21866	120
ARC	Factor: Wt1; motif: NNCCTCCCCCACNN; match class: 1	0.175637	0.0392405	8.09206e-08	353	62	1580	TF:M12438_1	TF	21866	3737
ARC	Factor: E2F-1; motif: NNNSSCGCSAANN	0.583569	0.0227599	1.05659e-07	353	206	9051	TF:M07250	TF	21866	736
ARC	Factor: Zfp740; motif: NNNCCCCCCCCMNNNN	0.390935	0.0265079	1.25624e-07	353	138	5206	TF:M02834	TF	21866	4046
ARC	Factor: AP-2alpha; motif: NSCCNCRGGSN	0.444759	0.0251562	1.41777e-07	353	157	6241	TF:M07348	TF	21866	96
ARC	Factor: SP1:SP3; motif: CCSCCCCCYCC; match class: 1	0.288952	0.0300177	1.56791e-07	353	102	3398	TF:M01219_1	TF	21866	3221
ARC	Factor: AP-2gamma; motif: GCCYNNGGS	0.484419	0.0242932	1.71705e-07	353	171	7039	TF:M00470	TF	21866	102
ARC	Factor: Kaiso; motif: SARNYCTCGCGAGAN	0.776204	0.0202663	1.77321e-07	353	274	13520	TF:M10276	TF	21866	3790
ARC	Factor: Sp2; motif: NYSGCCCCGCCCCCY; match class: 1	0.232295	0.0328789	2.77714e-07	353	82	2494	TF:M03567_1	TF	21866	3241
ARC	Factor: E2F-1; motif: GNGGGCGGGRMN	0.804533	0.0198949	2.85979e-07	353	284	14275	TF:M10209	TF	21866	728
ARC	Factor: Zfp281; motif: NNCCCCCCCCCCMYC	0.320113	0.028392	3.08125e-07	353	113	3980	TF:M02831	TF	21866	3872
ARC	Factor: AP-2; motif: MKCCCSCNGGCG	0.532578	0.0232846	3.27156e-07	353	188	8074	TF:M00189	TF	21866	118
ARC	Factor: BCL6B; motif: NNNNCCGCCCCWNNNN	0.78187	0.0201181	3.37414e-07	353	276	13719	TF:M02844	TF	21866	262
ARC	Factor: IRF6; motif: NNNACTCYCGGKNNN; match class: 1	0.487252	0.0240089	3.96351e-07	353	172	7164	TF:M02874_1	TF	21866	1767
ARC	Factor: Sp2; motif: NYSGCCCCGCCCCCY	0.450425	0.0246933	4.33574e-07	353	159	6439	TF:M03567	TF	21866	3240
ARC	Factor: ZBED6; motif: NRRGCTCGCCNN	0.405099	0.0256686	4.80643e-07	353	143	5571	TF:M01598	TF	21866	3774
ARC	Factor: FKLF; motif: BGGGNGGVMD	0.373938	0.0264635	4.97393e-07	353	132	4988	TF:M01837	TF	21866	1062
ARC	Factor: Zfp740; motif: NCCCCCCCAC; match class: 1	0.345609	0.0272748	5.33593e-07	353	122	4473	TF:M03944_1	TF	21866	4051
ARC	Factor: SP2; motif: GNNGGGGGCGGGGSN; match class: 1	0.25779	0.0307018	7.53651e-07	353	91	2964	TF:M03807_1	TF	21866	3243
ARC	Factor: GKLF; motif: NNRRGRRNGNSNNN	0.747875	0.0203437	9.08189e-07	353	264	12977	TF:M07040	TF	21866	1348
ARC	Factor: Egr-1; motif: WTGCGTGGGCGK	0.33711	0.0272811	9.94402e-07	353	119	4362	TF:M00243	TF	21866	818
ARC	Factor: BTEB3; motif: BNRNGGGAGGNGT	0.569405	0.0224105	1.2858e-06	353	201	8969	TF:M01865	TF	21866	336
ARC	Factor: ZBED6; motif: NRRGCTCGCCNN; match class: 1	0.152975	0.0393873	1.50912e-06	353	54	1371	TF:M01598_1	TF	21866	3775
ARC	Factor: BTEB2; motif: GNAGGGGGNGGGSSNN; match class: 1	0.133144	0.0421147	2.57245e-06	353	47	1116	TF:M03814_1	TF	21866	331
ARC	Factor: Sp4; motif: NNNNMCGCCCCCTNNNN	0.314448	0.0275982	2.64524e-06	353	111	4022	TF:M02810	TF	21866	3248
ARC	Factor: E2F-4; motif: NGGGGGCGGGRMNN; match class: 1	0.220963	0.0320988	2.65643e-06	353	78	2430	TF:M10211_1	TF	21866	759
ARC	Factor: AP-2beta; motif: GCNNNGGSCNGVGGGN; match class: 1	0.161473	0.0373526	3.41152e-06	353	57	1526	TF:M01858_1	TF	21866	101
ARC	Factor: SP1; motif: GGGGYGGGGNS; match class: 1	0.240793	0.0306638	3.65438e-06	353	85	2772	TF:M01303_1	TF	21866	3225
ARC	Factor: E2F-4; motif: GCGGGAAANA	0.628895	0.0214141	3.90231e-06	353	222	10367	TF:M02090	TF	21866	762
ARC	Factor: Zfp536; motif: NCGGAKG	0.436261	0.0242826	3.98393e-06	353	154	6342	TF:M05541	TF	21866	3968
ARC	Factor: Egr-2; motif: GCGTGGGCGG	0.481586	0.0234289	4.45266e-06	353	170	7256	TF:M05494	TF	21866	840
ARC	Factor: Zfp740; motif: NCCCCCCCAC	0.484419	0.0233383	5.18884e-06	353	171	7327	TF:M03944	TF	21866	4050
ARC	Factor: AP-2; motif: SNNNCCNCAGGCN; match class: 1	0.21813	0.0317395	5.75208e-06	353	77	2426	TF:M00915_1	TF	21866	121
ARC	Factor: ZAC; motif: KGGGCCR; match class: 1	0.223796	0.0313368	6.06127e-06	353	79	2521	TF:M05547_1	TF	21866	3773
ARC	Factor: E2F-1; motif: NKTSSCGC	0.512748	0.0228305	6.51581e-06	353	181	7928	TF:M00428	TF	21866	730
ARC	Factor: ZN451; motif: CKGGGGGG	0.189802	0.0337872	6.53633e-06	353	67	1983	TF:M06457	TF	21866	4150
ARC	Factor: IRF6; motif: NNNACTCYCGGKNNN	0.759207	0.0199375	6.59633e-06	353	268	13442	TF:M02874	TF	21866	1766
ARC	Factor: E2F-2; motif: NNNANGGCGCGCNNN	0.283286	0.0282406	7.45306e-06	353	100	3541	TF:M02742	TF	21866	742
ARC	Factor: WT1; motif: NGCGGGGGGGTSMMCYN; match class: 1	0.169972	0.035524	7.95197e-06	353	60	1689	TF:M05599_1	TF	21866	3735
ARC	Factor: MYF6; motif: NNNRACAGNCNCNCC; match class: 1	0.467422	0.0234508	9.36364e-06	353	165	7036	TF:M02885_1	TF	21866	2193
ARC	Factor: Sp1; motif: GGGGCGGGGT	0.532578	0.0224397	9.71959e-06	353	188	8378	TF:M00008	TF	21866	3222
ARC	Factor: Egr-3; motif: NTGCGTGGGCGK	0.419263	0.0243181	9.91264e-06	353	148	6086	TF:M00245	TF	21866	850
ARC	Factor: Egr-1; motif: NNGCGKGGGCGGGG; match class: 1	0.133144	0.0402397	1.08183e-05	353	47	1168	TF:M10213_1	TF	21866	833
ARC	Factor: LKLF; motif: CNCCACCCS	0.405099	0.024562	1.13365e-05	353	143	5822	TF:M08819	TF	21866	1920
ARC	Factor: BTEB3; motif: BNRNGGGAGGNGT; match class: 1	0.254958	0.0290323	1.58939e-05	353	90	3100	TF:M01865_1	TF	21866	337
ARC	Factor: Egr-1; motif: GCGGGGGCGG; match class: 1	0.155807	0.0361842	2.04941e-05	353	55	1520	TF:M01873_1	TF	21866	837
ARC	Factor: Zic1; motif: NNCCCCCGGGGGGG; match class: 1	0.441926	0.0235721	2.62342e-05	353	156	6618	TF:M02835_1	TF	21866	4123
ARC	Factor: IRF4; motif: NNNAYTCTCGGWNNN	0.798867	0.0193628	2.7393e-05	353	282	14564	TF:M02872	TF	21866	1748
ARC	Factor: Plagl1; motif: NNNGGGGSSCCCCNNN	0.186969	0.0328032	2.77638e-05	353	66	2012	TF:M02786	TF	21866	2712
ARC	Factor: AP-2alpha; motif: GCCNNNRGS	0.263456	0.0283277	2.77759e-05	353	93	3283	TF:M00469	TF	21866	90
ARC	Factor: NGFI-C; motif: WTGCGTGGGYGG	0.359773	0.0252335	2.87698e-05	353	127	5033	TF:M00244	TF	21866	2356
ARC	Factor: CKROX; motif: SCCCTCCCC	0.427762	0.0237571	3.23773e-05	353	151	6356	TF:M01175	TF	21866	476
ARC	Factor: FPM315; motif: SRGGGAGGAGGN; match class: 1	0.0651558	0.0642458	3.25263e-05	353	23	358	TF:M01587_1	TF	21866	1197
ARC	Factor: TCFAP2B; motif: NTWGCCKSMGGCRNN	0.405099	0.0241554	3.56652e-05	353	143	5920	TF:M02924	TF	21866	3578
ARC	Factor: VDR; motif: GGGKNARNRRGGWSA; match class: 1	0.291785	0.0270696	3.83187e-05	353	103	3805	TF:M00444_1	TF	21866	3731
ARC	Factor: KLF; motif: GGGNGGGG	0.532578	0.0220813	3.97734e-05	353	188	8514	TF:M07461	TF	21866	1852
ARC	Factor: ZNF151; motif: GGSGGNGGGGGAGGGGMGG; match class: 1	0.130312	0.0389831	4.14298e-05	353	46	1180	TF:M10412_1	TF	21866	2095
ARC	Factor: MAZ; motif: GGGGAGGG	0.526912	0.0220536	5.89742e-05	353	186	8434	TF:M00649	TF	21866	2024
ARC	Factor: ZAC; motif: KGGGCCR	0.441926	0.0232593	6.92034e-05	353	156	6707	TF:M05547	TF	21866	3772
ARC	Factor: Osx; motif: CCNCCCCCNNN; match class: 1	0.184136	0.0322421	6.98281e-05	353	65	2016	TF:M07329_1	TF	21866	2551
ARC	Factor: Egr1; motif: NNMCGCCCMCTCAMWN	0.320113	0.02587	7.27476e-05	353	113	4368	TF:M04506	TF	21866	826
ARC	Factor: PLAG1; motif: CCCCCKWNNNGGSCCC	0.314448	0.0259225	9.17223e-05	353	111	4282	TF:M01973	TF	21866	2708
ARC	Factor: Klf15; motif: RGGGMGGRGNNGGGGGNGG	0.252125	0.0280669	9.74266e-05	353	89	3171	TF:M10277	TF	21866	1826
ARC	Factor: LKLF; motif: GGGGTGGKSN	0.560907	0.0214844	0.000106807	353	198	9216	TF:M07261	TF	21866	1918
ARC	Factor: IRF4; motif: NNNAYTCTCGGWNNN; match class: 1	0.509915	0.022113	0.000109011	353	180	8140	TF:M02872_1	TF	21866	1749
ARC	Factor: E2F-7; motif: GRGGCGGGAANNN; match class: 1	0.246459	0.028201	0.000116691	353	87	3085	TF:M10212_1	TF	21866	767
ARC	Factor: KLF3; motif: NNNNNNGGGCGGGGCNNGN; match class: 1	0.249292	0.0280344	0.000125247	353	88	3139	TF:M10278_1	TF	21866	1835
ARC	Factor: AP-2gamma; motif: GCCYNCRGSN	0.458924	0.0227624	0.000140605	353	162	7117	TF:M03811	TF	21866	110
ARC	Factor: Foxn1; motif: RGAMGC	0.583569	0.0211499	0.0001487	353	206	9740	TF:M12470	TF	21866	1154
ARC	Factor: Zic1; motif: NNCCCCCGGGGGGG	0.575071	0.0212365	0.000153318	353	203	9559	TF:M02835	TF	21866	4122
ARC	Factor: KLF; motif: GGGNGGGG; match class: 1	0.25779	0.0275591	0.000154023	353	91	3302	TF:M07461_1	TF	21866	1853
ARC	Factor: E2F-4; motif: NTTTCSCGCC; match class: 1	0.371105	0.0242862	0.00015959	353	131	5394	TF:M07380_1	TF	21866	761
ARC	Factor: E2F-2; motif: NNNANGGCGCGCNNN; match class: 1	0.121813	0.0385996	0.000161731	353	43	1114	TF:M02742_1	TF	21866	743
ARC	Factor: Plagl1; motif: NNNGGGGSSCCCCNNN; match class: 1	0.167139	0.032687	0.000205929	353	59	1805	TF:M02786_1	TF	21866	2713
ARC	Factor: LKLF; motif: GGGGTGGKSN; match class: 1	0.283286	0.0263644	0.000252179	353	100	3793	TF:M07261_1	TF	21866	1919
ARC	Factor: Tfap2a; motif: NGCCYSAGGCN	0.490085	0.0220776	0.00031345	353	173	7836	TF:M04156	TF	21866	3622
ARC	Factor: Egr-2; motif: GCGTGGGCGG; match class: 1	0.226629	0.0284495	0.000321807	353	80	2812	TF:M05494_1	TF	21866	841
ARC	Factor: E2F-4; motif: GCGGGAAANA; match class: 1	0.331445	0.0247934	0.000396131	353	117	4719	TF:M02090_1	TF	21866	763
ARC	Factor: E2F-4; motif: NTTTCSCGCC	0.617564	0.0205777	0.000399969	353	218	10594	TF:M07380	TF	21866	760
ARC	Factor: Zfp740; motif: NNNCCCCCCCCMNNNN; match class: 1	0.283286	0.026096	0.00041544	353	100	3832	TF:M02834_1	TF	21866	4047
ARC	Factor: VDR; motif: GGGKNARNRRGGWSA	0.592068	0.0207753	0.000512252	353	209	10060	TF:M00444	TF	21866	3730
ARC	Factor: Sp1; motif: GGGGCGGGGT; match class: 1	0.25779	0.0267883	0.000563067	353	91	3397	TF:M00008_1	TF	21866	3223
ARC	Factor: MAZR; motif: NSGGGGGGGGMCN	0.283286	0.0258933	0.000605117	353	100	3862	TF:M00491	TF	21866	2020
ARC	Factor: Sp4; motif: SCCCCKCCCCCSN	0.21813	0.0284028	0.000621804	353	77	2711	TF:M07617	TF	21866	3254
ARC	Factor: E2F-3; motif: NNNANGGCGCGCSNW	0.161473	0.0315265	0.0011233	353	57	1808	TF:M02743	TF	21866	746
ARC	Factor: EGR-1; motif: TGCGTGGGCGK	0.29745	0.0251557	0.0011283	353	105	4174	TF:M01972	TF	21866	820
ARC	Factor: E2F-4; motif: GNNGGCGGGAAN; match class: 1	0.150142	0.0323961	0.00129124	353	53	1636	TF:M09682_1	TF	21866	757
ARC	Factor: E2F-4; motif: NGGGGGCGGGRMNN	0.441926	0.0222603	0.00143317	353	156	7008	TF:M10211	TF	21866	758
ARC	Factor: AP-2gamma; motif: GCCYNNGGS; match class: 1	0.254958	0.0263158	0.00146135	353	90	3420	TF:M00470_1	TF	21866	103
ARC	Factor: EGR-1; motif: NGCGKGGGCGKNN	0.286119	0.0252059	0.00185552	353	101	4007	TF:M08996	TF	21866	830
ARC	Factor: AP2; motif: GCCYGSGGSN; match class: 1	0.212465	0.0278707	0.00189356	353	75	2691	TF:M08867_1	TF	21866	117
ARC	Factor: Zfp281; motif: NNCCCCCCCCCCMYC; match class: 1	0.201133	0.0284227	0.00193127	353	71	2498	TF:M02831_1	TF	21866	3873
ARC	Factor: AP-2alpha; motif: GCCNNNRGS; match class: 1	0.172805	0.0300197	0.00220794	353	61	2032	TF:M00469_1	TF	21866	91
ARC	Factor: AP-2; motif: GSCCSCRGGCNRNRNN; match class: 1	0.192635	0.0287041	0.00242029	353	68	2369	TF:M00800_1	TF	21866	115
ARC	Factor: SREBP-2; motif: NNGYCACNNSMN	0.473088	0.0216658	0.00251743	353	167	7708	TF:M01177	TF	21866	3306
ARC	Factor: Tfap2a; motif: NGCCYSAGGCN; match class: 1	0.371105	0.0231449	0.00268268	353	131	5660	TF:M04156_1	TF	21866	3623
ARC	Factor: Foxn1; motif: RGAMGC; match class: 1	0.303116	0.0245076	0.0030046	353	107	4366	TF:M12470_1	TF	21866	1155
ARC	Factor: Pax-4; motif: NNNNNYCACCCB; match class: 1	0.773371	0.0188666	0.00379066	353	273	14470	TF:M00378_1	TF	21866	2615
ARC	Factor: HIC1; motif: NSNNNNTGCCCSSNN	0.21813	0.0268106	0.0057476	353	77	2872	TF:M01072	TF	21866	1458
ARC	Factor: Zfp536; motif: NCGGAKG; match class: 1	0.150142	0.0307603	0.00597696	353	53	1723	TF:M05541_1	TF	21866	3969
ARC	Factor: FPM315; motif: SRGGGAGGAGGN	0.192635	0.0278803	0.00662903	353	68	2439	TF:M01587	TF	21866	1196
ARC	Factor: Egr; motif: GTGGGSGCRRS	0.223796	0.0264657	0.00676996	353	79	2985	TF:M00807	TF	21866	862
ARC	Factor: Atf-1; motif: RTGACGTA	0.518414	0.0207225	0.0108995	353	183	8831	TF:M07980	TF	21866	192
ARC	Factor: AP-2gamma; motif: GCCYNCRGSN; match class: 1	0.184136	0.0278611	0.0115375	353	65	2333	TF:M03811_1	TF	21866	111
ARC	Factor: Pax-5; motif: RRMSWGANWYCTNRAGCGKRACSRYNSM; match class: 1	0.356941	0.0227601	0.0118411	353	126	5536	TF:M00144_1	TF	21866	2625
ARC	Factor: E2F-1; motif: NKTSSCGC; match class: 1	0.21813	0.0262172	0.0130703	353	77	2937	TF:M00428_1	TF	21866	731
ARC	Factor: Sp4; motif: NNNNMCGCCCCCTNNNN; match class: 1	0.0849858	0.0388098	0.0135418	353	30	773	TF:M02810_1	TF	21866	3249
ARC	Factor: Egr-2; motif: NTGCGTRGGCGK	0.348442	0.0228412	0.0137085	353	123	5385	TF:M00246	TF	21866	838
ARC	Factor: E2F-1; motif: NTTSGCGG; match class: 1	0.152975	0.029654	0.0138097	353	54	1821	TF:M00430_1	TF	21866	735
ARC	Factor: MZF-1; motif: KNGNKAGGGGNAA	0.396601	0.0220751	0.0139669	353	140	6342	TF:M00084	TF	21866	2224
ARC	Factor: Tcfl5; motif: NNCNCGNGNN	0.396601	0.0220751	0.0139669	353	140	6342	TF:M08005	TF	21866	3590
ARC	Factor: Tcfl5; motif: NNCNCGNGNN; match class: 1	0.396601	0.0220751	0.0139669	353	140	6342	TF:M08005_1	TF	21866	3591
ARC	Factor: Tfap2a; motif: TGCCCYNRGGGCA	0.509915	0.0207302	0.0141554	353	180	8683	TF:M04157	TF	21866	3624
ARC	Factor: LRF; motif: GGGGKYNNB; match class: 1	0.110482	0.0339426	0.0144554	353	39	1149	TF:M01100_1	TF	21866	1927
ARC	Factor: Zic3; motif: NMCCCCCGGGGGGGN	0.23796	0.025347	0.0165914	353	84	3314	TF:M02837	TF	21866	4128
ARC	Factor: LKLF; motif: CNCCACCCS; match class: 1	0.161473	0.028817	0.0175352	353	57	1978	TF:M08819_1	TF	21866	1921
ARC	Factor: LRF; motif: GGGGKYNNB	0.331445	0.0229637	0.0202588	353	117	5095	TF:M01100	TF	21866	1926
ARC	Factor: BTEB2; motif: RGGGNGKGGN; match class: 1	0.226629	0.0255918	0.0202776	353	80	3126	TF:M07277_1	TF	21866	333
ARC	Factor: Zic2; motif: NMCCCCCGGGGGGGN	0.260623	0.0242042	0.0352997	353	92	3801	TF:M02836	TF	21866	4124
ARC	Factor: NGFI-C; motif: WTGCGTGGGYGG; match class: 1	0.107649	0.032872	0.0383001	353	38	1156	TF:M00244_1	TF	21866	2357
ARC	Factor: CNOT3; motif: GGCCGCGSSS	0.186969	0.0266882	0.0384767	353	66	2473	TF:M01253	TF	21866	508
ARC	Factor: E2F-1; motif: TTGGCGCGRAANNGNM	0.334278	0.0225277	0.0452854	353	118	5238	TF:M00938	TF	21866	732
ARC	Factor: MYF6; motif: NNNRACAGNCNCNCC	0.753541	0.0185858	0.047859	353	266	14312	TF:M02885	TF	21866	2192
ARC	Factor: E2F-7; motif: GRGGCGGGAANNN	0.475921	0.0206744	0.0495737	353	168	8126	TF:M10212	TF	21866	766
ARC	Factor: Hes1; motif: NNCACGYGNN	0.793201	0.0183318	0.0498943	353	280	15274	TF:M07991	TF	21866	1436
ARC	Splicing factor NOVA regulated synaptic proteins	0.0819672	0.238095	4.7726e-06	122	10	42	WP:WP1983	WP	4531	14
ARC	Electron transport chain	0.106557	0.141304	3.69145e-05	122	13	92	WP:WP295	WP	4531	5
ARC	Oxidative phosphorylation	0.057377	0.12963	0.0259613	122	7	54	WP:WP1248	WP	4531	98
LHA	nervous system development	0.333333	0.02818	2.84743e-19	216	72	2555	GO:0007399	GO:BP	27205	2969
LHA	system development	0.416667	0.0218712	6.90823e-18	216	90	4115	GO:0048731	GO:BP	27205	13728
LHA	developmental process	0.541667	0.017043	1.60965e-16	216	117	6865	GO:0032502	GO:BP	27205	8032
LHA	multicellular organism development	0.439815	0.0194952	9.74836e-16	216	95	4873	GO:0007275	GO:BP	27205	2871
LHA	anatomical structure development	0.50463	0.0175016	1.35667e-15	216	109	6228	GO:0048856	GO:BP	27205	13840
LHA	neurogenesis	0.236111	0.0272582	7.92692e-12	216	51	1871	GO:0022008	GO:BP	27205	6923
LHA	cell adhesion	0.203704	0.0300752	2.97654e-11	216	44	1463	GO:0007155	GO:BP	27205	2782
LHA	generation of neurons	0.203704	0.0269773	1.27157e-09	216	44	1631	GO:0048699	GO:BP	27205	13696
LHA	central nervous system development	0.162037	0.0324977	2.4436e-09	216	35	1077	GO:0007417	GO:BP	27205	2983
LHA	neuron differentiation	0.194444	0.0270096	4.51259e-09	216	42	1555	GO:0030182	GO:BP	27205	7062
LHA	cell-cell adhesion	0.148148	0.0346696	4.64948e-09	216	32	923	GO:0098609	GO:BP	27205	19855
LHA	cell differentiation	0.361111	0.0165429	5.01065e-08	216	78	4715	GO:0030154	GO:BP	27205	7050
LHA	multicellular organismal process	0.555556	0.0131119	5.15807e-08	216	120	9152	GO:0032501	GO:BP	27205	8031
LHA	cellular developmental process	0.361111	0.016428	7.11026e-08	216	78	4748	GO:0048869	GO:BP	27205	13852
LHA	anatomical structure morphogenesis	0.259259	0.0200933	7.70046e-08	216	56	2787	GO:0009653	GO:BP	27205	3648
LHA	transmembrane transport	0.185185	0.0253646	1.11065e-07	216	40	1577	GO:0055085	GO:BP	27205	15067
LHA	neuron development	0.162037	0.0276461	2.14019e-07	216	35	1266	GO:0048666	GO:BP	27205	13664
LHA	monoatomic ion transmembrane transport	0.143519	0.0305118	2.59414e-07	216	31	1016	GO:0034220	GO:BP	27205	8951
LHA	monoatomic ion transport	0.162037	0.0273224	2.93772e-07	216	35	1281	GO:0006811	GO:BP	27205	2547
LHA	positive regulation of cellular process	0.412037	0.0148408	3.36542e-07	216	89	5997	GO:0048522	GO:BP	27205	13543
LHA	brain development	0.125	0.033877	4.65492e-07	216	27	797	GO:0007420	GO:BP	27205	2986
LHA	animal organ development	0.277778	0.0180397	9.57532e-07	216	60	3326	GO:0048513	GO:BP	27205	13536
LHA	regulation of biological quality	0.273148	0.0181874	1.02868e-06	216	59	3244	GO:0065008	GO:BP	27205	16812
LHA	head development	0.125	0.0317647	1.89255e-06	216	27	850	GO:0060322	GO:BP	27205	15367
LHA	neuron projection development	0.143519	0.0279279	2.21053e-06	216	31	1110	GO:0031175	GO:BP	27205	7471
LHA	inorganic ion transmembrane transport	0.12963	0.0305011	2.22613e-06	216	28	918	GO:0098660	GO:BP	27205	19866
LHA	regulation of multicellular organismal process	0.268519	0.0178681	2.97396e-06	216	58	3246	GO:0051239	GO:BP	27205	14358
LHA	phosphorus metabolic process	0.24537	0.0188411	3.02674e-06	216	53	2813	GO:0006793	GO:BP	27205	2534
LHA	plasma membrane bounded cell projection organization	0.175926	0.0232701	4.03942e-06	216	38	1633	GO:0120036	GO:BP	27205	20549
LHA	chemical homeostasis	0.138889	0.0276498	5.30933e-06	216	30	1085	GO:0048878	GO:BP	27205	13859
LHA	cell projection organization	0.175926	0.0227681	7.32944e-06	216	38	1669	GO:0030030	GO:BP	27205	7016
LHA	carbohydrate derivative metabolic process	0.134259	0.0278311	8.66695e-06	216	29	1042	GO:1901135	GO:BP	27205	22199
LHA	monoatomic cation transport	0.134259	0.0272813	1.34912e-05	216	29	1063	GO:0006812	GO:BP	27205	2548
LHA	small molecule metabolic process	0.185185	0.0213447	1.64177e-05	216	40	1874	GO:0044281	GO:BP	27205	11589
LHA	biological regulation	0.699074	0.010912	1.65962e-05	216	151	13838	GO:0065007	GO:BP	27205	16811
LHA	phosphate-containing compound metabolic process	0.236111	0.0182796	1.85724e-05	216	51	2790	GO:0006796	GO:BP	27205	2537
LHA	behavior	0.111111	0.0315789	1.92872e-05	216	24	760	GO:0007610	GO:BP	27205	3139
LHA	positive regulation of biological process	0.421296	0.0135175	2.68284e-05	216	91	6732	GO:0048518	GO:BP	27205	13539
LHA	negative regulation of biological process	0.388889	0.014	2.84919e-05	216	84	6000	GO:0048519	GO:BP	27205	13540
LHA	monoatomic cation transmembrane transport	0.115741	0.0297265	3.06782e-05	216	25	841	GO:0098655	GO:BP	27205	19861
LHA	energy coupled proton transmembrane transport, against electrochemical gradient	0.0185185	0.8	3.55669e-05	216	4	5	GO:0015988	GO:BP	27205	5187
LHA	electron transport coupled proton transport	0.0185185	0.8	3.55669e-05	216	4	5	GO:0015990	GO:BP	27205	5188
LHA	homeostatic process	0.175926	0.0213124	4.30005e-05	216	38	1783	GO:0042592	GO:BP	27205	10828
LHA	ATP synthesis coupled electron transport	0.0416667	0.107143	4.32024e-05	216	9	84	GO:0042773	GO:BP	27205	10935
LHA	proton transmembrane transport	0.0509259	0.0758621	4.52764e-05	216	11	145	GO:1902600	GO:BP	27205	23418
LHA	oxidative phosphorylation	0.0509259	0.0753425	4.86281e-05	216	11	146	GO:0006119	GO:BP	27205	2021
LHA	energy derivation by oxidation of organic compounds	0.0740741	0.0453258	4.95318e-05	216	16	353	GO:0015980	GO:BP	27205	5183
LHA	regulation of plasma membrane bounded cell projection organization	0.106481	0.0311231	5.20418e-05	216	23	739	GO:0120035	GO:BP	27205	20548
LHA	transport	0.324074	0.0150086	5.72554e-05	216	70	4664	GO:0006810	GO:BP	27205	2546
LHA	inorganic cation transmembrane transport	0.111111	0.029703	6.15141e-05	216	24	808	GO:0098662	GO:BP	27205	19868
LHA	purine nucleoside triphosphate biosynthetic process	0.0462963	0.0854701	6.3713e-05	216	10	117	GO:0009145	GO:BP	27205	3388
LHA	localization	0.361111	0.0142051	6.9568e-05	216	78	5491	GO:0051179	GO:BP	27205	14323
LHA	regulation of cell projection organization	0.106481	0.0305445	7.3199e-05	216	23	753	GO:0031344	GO:BP	27205	7530
LHA	regulation of biological process	0.675926	0.010876	7.41957e-05	216	146	13424	GO:0050789	GO:BP	27205	14004
LHA	regulation of cellular component organization	0.217593	0.0182029	9.36155e-05	216	47	2582	GO:0051128	GO:BP	27205	14274
LHA	purine ribonucleotide metabolic process	0.0740741	0.0428954	0.000106046	216	16	373	GO:0009150	GO:BP	27205	3393
LHA	regulation of developmental process	0.222222	0.0177646	0.000137215	216	48	2702	GO:0050793	GO:BP	27205	14007
LHA	aerobic electron transport chain	0.037037	0.115942	0.00014171	216	8	69	GO:0019646	GO:BP	27205	6286
LHA	aerobic respiration	0.0555556	0.0597015	0.00014927	216	12	201	GO:0009060	GO:BP	27205	3312
LHA	regulation of cellular process	0.62963	0.0110497	0.000204608	216	136	12308	GO:0050794	GO:BP	27205	14008
LHA	nucleoside triphosphate biosynthetic process	0.0462963	0.075188	0.000215875	216	10	133	GO:0009142	GO:BP	27205	3385
LHA	establishment of localization	0.324074	0.0145138	0.000222314	216	70	4823	GO:0051234	GO:BP	27205	14353
LHA	ribonucleotide metabolic process	0.0740741	0.0406091	0.000223993	216	16	394	GO:0009259	GO:BP	27205	3500
LHA	synapse assembly	0.0555556	0.0571429	0.000240714	216	12	210	GO:0007416	GO:BP	27205	2982
LHA	purine-containing compound metabolic process	0.0833333	0.0357143	0.000244501	216	18	504	GO:0072521	GO:BP	27205	18397
LHA	purine nucleoside triphosphate metabolic process	0.0509259	0.0635838	0.000277428	216	11	173	GO:0009144	GO:BP	27205	3387
LHA	ribose phosphate metabolic process	0.0740741	0.0397022	0.000304081	216	16	403	GO:0019693	GO:BP	27205	6330
LHA	ATP biosynthetic process	0.0416667	0.0857143	0.000305402	216	9	105	GO:0006754	GO:BP	27205	2506
LHA	cell development	0.240741	0.0165658	0.000321268	216	52	3139	GO:0048468	GO:BP	27205	13507
LHA	cell junction assembly	0.0787037	0.0371179	0.000321523	216	17	458	GO:0034329	GO:BP	27205	9020
LHA	positive regulation of cellular component organization	0.134259	0.0232745	0.000406716	216	29	1246	GO:0051130	GO:BP	27205	14276
LHA	ATP metabolic process	0.0462963	0.0699301	0.0004265	216	10	143	GO:0046034	GO:BP	27205	12513
LHA	purine nucleotide metabolic process	0.0787037	0.0363248	0.000435765	216	17	468	GO:0006163	GO:BP	27205	2042
LHA	carbohydrate derivative biosynthetic process	0.0925926	0.0307692	0.000526378	216	20	650	GO:1901137	GO:BP	27205	22201
LHA	respiratory electron transport chain	0.0416667	0.0803571	0.000532281	216	9	112	GO:0022904	GO:BP	27205	6993
LHA	mitochondrial ATP synthesis coupled electron transport	0.037037	0.097561	0.000552978	216	8	82	GO:0042775	GO:BP	27205	10937
LHA	synaptic membrane adhesion	0.0277778	0.171429	0.000579588	216	6	35	GO:0099560	GO:BP	27205	20200
LHA	negative regulation of glial cell differentiation	0.0277778	0.171429	0.000579588	216	6	35	GO:0045686	GO:BP	27205	12234
LHA	generation of precursor metabolites and energy	0.0740741	0.0378251	0.000582554	216	16	423	GO:0006091	GO:BP	27205	1998
LHA	purine ribonucleoside triphosphate biosynthetic process	0.0416667	0.0775862	0.000718584	216	9	116	GO:0009206	GO:BP	27205	3448
LHA	negative regulation of cellular process	0.324074	0.0140704	0.000752121	216	70	4975	GO:0048523	GO:BP	27205	13544
LHA	glial cell development	0.0416667	0.0769231	0.000773157	216	9	117	GO:0021782	GO:BP	27205	6710
LHA	cell junction organization	0.101852	0.0275689	0.00084399	216	22	798	GO:0034330	GO:BP	27205	9021
LHA	nucleoside triphosphate metabolic process	0.0509259	0.056701	0.000876954	216	11	194	GO:0009141	GO:BP	27205	3384
LHA	regulation of nervous system development	0.0833333	0.0326679	0.000900768	216	18	551	GO:0051960	GO:BP	27205	14818
LHA	ribonucleoside triphosphate biosynthetic process	0.0416667	0.0737705	0.00110338	216	9	122	GO:0009201	GO:BP	27205	3443
LHA	proton motive force-driven mitochondrial ATP synthesis	0.0324074	0.111111	0.00126804	216	7	63	GO:0042776	GO:BP	27205	10938
LHA	regulation of signaling	0.25463	0.0154062	0.0013537	216	55	3570	GO:0023051	GO:BP	27205	7001
LHA	organophosphate metabolic process	0.111111	0.0248963	0.00152722	216	24	964	GO:0019637	GO:BP	27205	6280
LHA	purine ribonucleoside triphosphate metabolic process	0.0462963	0.0598802	0.0017885	216	10	167	GO:0009205	GO:BP	27205	3447
LHA	sodium ion transmembrane transport	0.0462963	0.0598802	0.0017885	216	10	167	GO:0035725	GO:BP	27205	9702
LHA	purine ribonucleotide biosynthetic process	0.0509259	0.052381	0.00191995	216	11	210	GO:0009152	GO:BP	27205	3395
LHA	nucleotide metabolic process	0.0787037	0.0326296	0.0019236	216	17	521	GO:0009117	GO:BP	27205	3362
LHA	glial cell differentiation	0.0555556	0.0466926	0.00208179	216	12	257	GO:0010001	GO:BP	27205	3901
LHA	cell-cell signaling	0.157407	0.0194508	0.00214464	216	34	1748	GO:0007267	GO:BP	27205	2864
LHA	synapse organization	0.0787037	0.0320151	0.0024912	216	17	531	GO:0050808	GO:BP	27205	14020
LHA	nucleoside phosphate metabolic process	0.0787037	0.0320151	0.0024912	216	17	531	GO:0006753	GO:BP	27205	2505
LHA	nucleobase-containing small molecule metabolic process	0.0833333	0.0304054	0.00251286	216	18	592	GO:0055086	GO:BP	27205	15068
LHA	electron transport chain	0.0416667	0.0666667	0.00258695	216	9	135	GO:0022900	GO:BP	27205	6992
LHA	proton motive force-driven ATP synthesis	0.0324074	0.1	0.00262131	216	7	70	GO:0015986	GO:BP	27205	5185
LHA	ribonucleoside triphosphate metabolic process	0.0462963	0.0571429	0.00273758	216	10	175	GO:0009199	GO:BP	27205	3441
LHA	cellular respiration	0.0555556	0.0454545	0.00275726	216	12	264	GO:0045333	GO:BP	27205	12059
LHA	regulation of multicellular organismal development	0.143519	0.0202482	0.00296299	216	31	1531	GO:2000026	GO:BP	27205	26633
LHA	positive regulation of developmental process	0.138889	0.0205761	0.00321903	216	30	1458	GO:0051094	GO:BP	27205	14249
LHA	regulation of cell communication	0.25	0.0151091	0.00323253	216	54	3574	GO:0010646	GO:BP	27205	4388
LHA	synaptic signaling	0.106481	0.0244421	0.00357937	216	23	941	GO:0099536	GO:BP	27205	20177
LHA	regulation of neuron projection development	0.0787037	0.0310786	0.00371963	216	17	547	GO:0010975	GO:BP	27205	4665
LHA	ribonucleotide biosynthetic process	0.0509259	0.0488889	0.00376479	216	11	225	GO:0009260	GO:BP	27205	3501
LHA	positive regulation of cell projection organization	0.0694444	0.0344828	0.00432197	216	15	435	GO:0031346	GO:BP	27205	7532
LHA	organonitrogen compound metabolic process	0.37963	0.0126368	0.00444715	216	82	6489	GO:1901564	GO:BP	27205	22563
LHA	response to abiotic stimulus	0.12963	0.0210685	0.0047156	216	28	1329	GO:0009628	GO:BP	27205	3626
LHA	mitochondrial electron transport, NADH to ubiquinone	0.0231481	0.178571	0.00472432	216	5	28	GO:0006120	GO:BP	27205	2022
LHA	ribose phosphate biosynthetic process	0.0509259	0.0474138	0.00506314	216	11	232	GO:0046390	GO:BP	27205	12823
LHA	intracellular chemical homeostasis	0.0925926	0.0264901	0.00527863	216	20	755	GO:0055082	GO:BP	27205	15066
LHA	organonitrogen compound biosynthetic process	0.152778	0.0188679	0.00605476	216	33	1749	GO:1901566	GO:BP	27205	22565
LHA	trans-synaptic signaling	0.101852	0.0243902	0.00627336	216	22	902	GO:0099537	GO:BP	27205	20178
LHA	cellular process	0.884259	0.00921326	0.00749175	216	191	20731	GO:0009987	GO:BP	27205	3889
LHA	cell morphogenesis involved in neuron differentiation	0.0833333	0.0279938	0.00796036	216	18	643	GO:0048667	GO:BP	27205	13665
LHA	negative regulation of gliogenesis	0.0277778	0.109091	0.00906931	216	6	55	GO:0014014	GO:BP	27205	4703
LHA	purine nucleotide biosynthetic process	0.0509259	0.0445344	0.0092301	216	11	247	GO:0006164	GO:BP	27205	2043
LHA	cellular homeostasis	0.0972222	0.0245902	0.00935226	216	21	854	GO:0019725	GO:BP	27205	6348
LHA	cell migration	0.138889	0.0194553	0.00983777	216	30	1542	GO:0016477	GO:BP	27205	5356
LHA	locomotory behavior	0.0509259	0.044	0.0103535	216	11	250	GO:0007626	GO:BP	27205	3155
LHA	sodium ion transport	0.0509259	0.044	0.0103535	216	11	250	GO:0006814	GO:BP	27205	2550
LHA	cell morphogenesis involved in differentiation	0.087963	0.0263158	0.0103805	216	19	722	GO:0000904	GO:BP	27205	250
LHA	blood circulation	0.0740741	0.0301318	0.0110761	216	16	531	GO:0008015	GO:BP	27205	3168
LHA	astrocyte differentiation	0.0324074	0.0795455	0.0123028	216	7	88	GO:0048708	GO:BP	27205	13705
LHA	gliogenesis	0.0601852	0.0360111	0.0130157	216	13	361	GO:0042063	GO:BP	27205	10516
LHA	purine-containing compound biosynthetic process	0.0509259	0.0428016	0.0134498	216	11	257	GO:0072522	GO:BP	27205	18398
LHA	response to stimulus	0.537037	0.0109475	0.013542	216	116	10596	GO:0050896	GO:BP	27205	14092
LHA	regulation of cell-cell adhesion	0.0694444	0.0311203	0.0148752	216	15	482	GO:0022407	GO:BP	27205	6960
LHA	response to inorganic substance	0.0833333	0.0267062	0.0151369	216	18	674	GO:0010035	GO:BP	27205	3925
LHA	protein localization to cell junction	0.037037	0.0629921	0.015325	216	8	127	GO:1902414	GO:BP	27205	23300
LHA	monoatomic cation homeostasis	0.0787037	0.0278232	0.0160438	216	17	611	GO:0055080	GO:BP	27205	15064
LHA	response to oxygen-containing compound	0.171296	0.0169647	0.0164415	216	37	2181	GO:1901700	GO:BP	27205	22661
LHA	negative regulation of neurogenesis	0.0416667	0.0529412	0.0171696	216	9	170	GO:0050768	GO:BP	27205	13988
LHA	regulation of glial cell differentiation	0.0324074	0.0752688	0.0177545	216	7	93	GO:0045685	GO:BP	27205	12233
LHA	stress response to copper ion	0.0138889	0.5	0.0179627	216	3	6	GO:1990169	GO:BP	27205	26332
LHA	detoxification of copper ion	0.0138889	0.5	0.0179627	216	3	6	GO:0010273	GO:BP	27205	4126
LHA	inorganic ion homeostasis	0.0740741	0.0288809	0.0187772	216	16	554	GO:0098771	GO:BP	27205	19937
LHA	response to copper ion	0.0231481	0.135135	0.0197705	216	5	37	GO:0046688	GO:BP	27205	13029
LHA	regulation of presynaptic membrane potential	0.0231481	0.135135	0.0197705	216	5	37	GO:0099505	GO:BP	27205	20163
LHA	negative regulation of oligodendrocyte differentiation	0.0185185	0.222222	0.0200698	216	4	18	GO:0048715	GO:BP	27205	13712
LHA	cell morphogenesis	0.106481	0.0219466	0.0208196	216	23	1048	GO:0000902	GO:BP	27205	249
LHA	monoatomic ion homeostasis	0.0787037	0.0272436	0.0210602	216	17	624	GO:0050801	GO:BP	27205	14013
LHA	negative regulation of nervous system development	0.0416667	0.0514286	0.021675	216	9	175	GO:0051961	GO:BP	27205	14819
LHA	circulatory system process	0.0740741	0.0284698	0.0224093	216	16	562	GO:0003013	GO:BP	27205	1483
LHA	neuron projection morphogenesis	0.0833333	0.0257511	0.0246987	216	18	699	GO:0048812	GO:BP	27205	13798
LHA	cell population proliferation	0.166667	0.0168776	0.0247985	216	36	2133	GO:0008283	GO:BP	27205	3223
LHA	forebrain development	0.0648148	0.0315315	0.0259082	216	14	444	GO:0030900	GO:BP	27205	7322
LHA	regulation of synapse assembly	0.037037	0.0583942	0.0267052	216	8	137	GO:0051963	GO:BP	27205	14821
LHA	neurotransmitter uptake	0.0231481	0.125	0.0292724	216	5	40	GO:0001504	GO:BP	27205	334
LHA	cell-cell adhesion via plasma-membrane adhesion molecules	0.0509259	0.0392857	0.0300027	216	11	280	GO:0098742	GO:BP	27205	19918
LHA	nucleotide biosynthetic process	0.0509259	0.0390071	0.0320476	216	11	282	GO:0009165	GO:BP	27205	3407
LHA	hindbrain development	0.0416667	0.048913	0.0323461	216	9	184	GO:0030902	GO:BP	27205	7324
LHA	plasma membrane bounded cell projection morphogenesis	0.0833333	0.0252101	0.0327554	216	18	714	GO:0120039	GO:BP	27205	20550
LHA	cell surface receptor signaling pathway	0.203704	0.0151986	0.0328963	216	44	2895	GO:0007166	GO:BP	27205	2793
LHA	positive regulation of sodium ion transport	0.0231481	0.121951	0.0331237	216	5	41	GO:0010765	GO:BP	27205	4486
LHA	nucleoside phosphate biosynthetic process	0.0509259	0.0385965	0.0353414	216	11	285	GO:1901293	GO:BP	27205	22331
LHA	locomotion	0.125	0.0192857	0.0354839	216	27	1400	GO:0040011	GO:BP	27205	10464
LHA	regulation of cell adhesion	0.087963	0.0240811	0.0358563	216	19	789	GO:0030155	GO:BP	27205	7051
LHA	cell projection morphogenesis	0.0833333	0.025	0.0365872	216	18	720	GO:0048858	GO:BP	27205	13842
LHA	regulation of cell junction assembly	0.0462963	0.0425532	0.0369945	216	10	235	GO:1901888	GO:BP	27205	22843
LHA	cellular component organization	0.412037	0.0116584	0.0390244	216	89	7634	GO:0016043	GO:BP	27205	5200
LHA	regulation of cell differentiation	0.143519	0.0177752	0.0401177	216	31	1744	GO:0045595	GO:BP	27205	12146
LHA	regulation of synapse organization	0.0509259	0.0380623	0.040187	216	11	289	GO:0050807	GO:BP	27205	14019
LHA	regulation of transport	0.152778	0.0170984	0.0461618	216	33	1930	GO:0051049	GO:BP	27205	14219
LHA	postsynapse	0.176744	0.0438799	1.96068e-15	215	38	866	GO:0098794	GO:CC	27262	3266
LHA	cell junction	0.274419	0.0257193	4.94555e-14	215	59	2294	GO:0030054	GO:CC	27262	871
LHA	synapse	0.223256	0.0286225	1.20439e-12	215	48	1677	GO:0045202	GO:CC	27262	2147
LHA	cytoplasm	0.683721	0.0126506	5.5154e-12	215	147	11620	GO:0005737	GO:CC	27262	309
LHA	postsynaptic membrane	0.102326	0.0662651	8.22439e-12	215	22	332	GO:0045211	GO:CC	27262	2148
LHA	membrane protein complex	0.181395	0.0323383	1.58398e-11	215	39	1206	GO:0098796	GO:CC	27262	3267
LHA	synaptic membrane	0.116279	0.0515464	3.98223e-11	215	25	485	GO:0097060	GO:CC	27262	2907
LHA	plasma membrane region	0.186047	0.028169	5.8357e-10	215	40	1420	GO:0098590	GO:CC	27262	3226
LHA	cell projection	0.260465	0.0213985	7.84896e-10	215	56	2617	GO:0042995	GO:CC	27262	1850
LHA	plasma membrane bounded cell projection	0.251163	0.0214541	1.97045e-09	215	54	2517	GO:0120025	GO:CC	27262	3453
LHA	neuron to neuron synapse	0.106977	0.0475207	2.10366e-09	215	23	484	GO:0098984	GO:CC	27262	3331
LHA	membrane	0.604651	0.0126091	3.78714e-09	215	130	10310	GO:0016020	GO:CC	27262	722
LHA	postsynaptic specialization	0.102326	0.0468085	8.27165e-09	215	22	470	GO:0099572	GO:CC	27262	3384
LHA	neuron projection	0.190698	0.0251072	1.09104e-08	215	41	1633	GO:0043005	GO:CC	27262	1851
LHA	transmembrane transporter complex	0.0930233	0.0510204	1.50518e-08	215	20	392	GO:1902495	GO:CC	27262	3621
LHA	transporter complex	0.0930233	0.0479616	4.49639e-08	215	20	417	GO:1990351	GO:CC	27262	3868
LHA	postsynaptic density	0.0930233	0.04662	7.39779e-08	215	20	429	GO:0014069	GO:CC	27262	696
LHA	astrocyte projection	0.0325581	0.318182	7.94533e-08	215	7	22	GO:0097449	GO:CC	27262	3016
LHA	asymmetric synapse	0.0930233	0.0447427	1.51437e-07	215	20	447	GO:0032279	GO:CC	27262	1285
LHA	glial cell projection	0.0372093	0.195122	3.00425e-07	215	8	41	GO:0097386	GO:CC	27262	2987
LHA	somatodendritic compartment	0.144186	0.0276786	3.7527e-07	215	31	1120	GO:0036477	GO:CC	27262	1724
LHA	inner mitochondrial membrane protein complex	0.055814	0.08	8.46077e-07	215	12	150	GO:0098800	GO:CC	27262	3271
LHA	glutamatergic synapse	0.102326	0.0360656	1.09972e-06	215	22	610	GO:0098978	GO:CC	27262	3325
LHA	cell periphery	0.44186	0.013479	1.20725e-06	215	95	7048	GO:0071944	GO:CC	27262	2801
LHA	dendrite	0.116279	0.031211	1.6565e-06	215	25	801	GO:0030425	GO:CC	27262	936
LHA	dendritic tree	0.116279	0.0311333	1.74072e-06	215	25	803	GO:0097447	GO:CC	27262	3014
LHA	mitochondrial respirasome	0.0418605	0.1	1.2141e-05	215	9	90	GO:0005746	GO:CC	27262	317
LHA	respiratory chain complex	0.0418605	0.1	1.2141e-05	215	9	90	GO:0098803	GO:CC	27262	3273
LHA	respirasome	0.0418605	0.0918367	2.56194e-05	215	9	98	GO:0070469	GO:CC	27262	2505
LHA	plasma membrane	0.4	0.0130958	4.73735e-05	215	86	6567	GO:0005886	GO:CC	27262	424
LHA	organelle membrane	0.246512	0.0160606	8.18727e-05	215	53	3300	GO:0031090	GO:CC	27262	1048
LHA	astrocyte end-foot	0.0186047	0.444444	0.000137586	215	4	9	GO:0097450	GO:CC	27262	3017
LHA	GABA-ergic synapse	0.0418605	0.072	0.000207184	215	9	125	GO:0098982	GO:CC	27262	3329
LHA	cell body	0.102326	0.0264423	0.000243868	215	22	832	GO:0044297	GO:CC	27262	2056
LHA	cellular anatomical entity	0.944186	0.00890507	0.000367894	215	203	22796	GO:0110165	GO:CC	27262	3449
LHA	axon	0.0976744	0.0264151	0.000446909	215	21	795	GO:0030424	GO:CC	27262	935
LHA	presynaptic membrane	0.0511628	0.0488889	0.00057037	215	11	225	GO:0042734	GO:CC	27262	1839
LHA	dendritic spine	0.0511628	0.0488889	0.00057037	215	11	225	GO:0043197	GO:CC	27262	1872
LHA	neuron spine	0.0511628	0.047619	0.000735974	215	11	231	GO:0044309	GO:CC	27262	2068
LHA	endomembrane system	0.27907	0.0140121	0.00108418	215	60	4282	GO:0012505	GO:CC	27262	689
LHA	plasma membrane protein complex	0.0790698	0.0293103	0.00119969	215	17	580	GO:0098797	GO:CC	27262	3268
LHA	postsynaptic specialization membrane	0.0418605	0.0580645	0.0012415	215	9	155	GO:0099634	GO:CC	27262	3390
LHA	mitochondrial protein-containing complex	0.055814	0.0397351	0.00165998	215	12	302	GO:0098798	GO:CC	27262	3269
LHA	synaptic vesicle	0.0511628	0.0426357	0.00211711	215	11	258	GO:0008021	GO:CC	27262	488
LHA	presynapse	0.0883721	0.0255376	0.0023303	215	19	744	GO:0098793	GO:CC	27262	3265
LHA	cell projection membrane	0.0604651	0.0354223	0.00233542	215	13	367	GO:0031253	GO:CC	27262	1078
LHA	neuronal cell body	0.0883721	0.0254692	0.00242006	215	19	746	GO:0043025	GO:CC	27262	1853
LHA	sarcolemma	0.0418605	0.0520231	0.00302857	215	9	173	GO:0042383	GO:CC	27262	1785
LHA	organelle	0.734884	0.00974166	0.00350375	215	158	16219	GO:0043226	GO:CC	27262	1883
LHA	exocytic vesicle	0.0511628	0.0397112	0.00412308	215	11	277	GO:0070382	GO:CC	27262	2478
LHA	mitochondrial membrane	0.0883721	0.0244216	0.00434902	215	19	778	GO:0031966	GO:CC	27262	1217
LHA	membrane raft	0.0604651	0.0323383	0.00611217	215	13	402	GO:0045121	GO:CC	27262	2137
LHA	anchoring junction	0.0837209	0.0247593	0.00614322	215	18	727	GO:0070161	GO:CC	27262	2447
LHA	membrane microdomain	0.0604651	0.0322581	0.00627258	215	13	403	GO:0098857	GO:CC	27262	3298
LHA	neuron projection membrane	0.027907	0.08	0.00859653	215	6	75	GO:0032589	GO:CC	27262	1322
LHA	mitochondrial envelope	0.0883721	0.0227001	0.0117773	215	19	837	GO:0005740	GO:CC	27262	311
LHA	NADH dehydrogenase complex	0.0232558	0.1	0.0138393	215	5	50	GO:0030964	GO:CC	27262	1017
LHA	mitochondrial respiratory chain complex I	0.0232558	0.1	0.0138393	215	5	50	GO:0005747	GO:CC	27262	318
LHA	respiratory chain complex I	0.0232558	0.1	0.0138393	215	5	50	GO:0045271	GO:CC	27262	2178
LHA	oxidoreductase complex	0.0325581	0.057377	0.0160238	215	7	122	GO:1990204	GO:CC	27262	3808
LHA	transport vesicle membrane	0.0418605	0.0410959	0.0193701	215	9	219	GO:0030658	GO:CC	27262	950
LHA	Golgi apparatus	0.125581	0.0176355	0.023552	215	27	1531	GO:0005794	GO:CC	27262	358
LHA	envelope	0.111628	0.0185759	0.027604	215	24	1292	GO:0031975	GO:CC	27262	1225
LHA	organelle envelope	0.111628	0.0185759	0.027604	215	24	1292	GO:0031967	GO:CC	27262	1218
LHA	cell-cell junction	0.0651163	0.0262172	0.0286677	215	14	534	GO:0005911	GO:CC	27262	441
LHA	Schaffer collateral - CA1 synapse	0.0325581	0.0522388	0.0289963	215	7	134	GO:0098685	GO:CC	27262	3252
LHA	sodium:potassium-exchanging ATPase complex	0.0139535	0.25	0.0302308	215	3	12	GO:0005890	GO:CC	27262	426
LHA	transport vesicle	0.055814	0.0289157	0.0368294	215	12	415	GO:0030133	GO:CC	27262	912
LHA	intracellular anatomical structure	0.75814	0.00931163	0.0496264	215	163	17505	GO:0005622	GO:CC	27262	237
LHA	transporter activity	0.178404	0.0324786	5.83334e-10	213	38	1170	GO:0005215	GO:MF	25177	1358
LHA	transmembrane transporter activity	0.169014	0.0336134	9.45453e-10	213	36	1071	GO:0022857	GO:MF	25177	3819
LHA	oxidoreduction-driven active transmembrane transporter activity	0.0422535	0.290323	2.23258e-09	213	9	31	GO:0015453	GO:MF	25177	2571
LHA	primary active transmembrane transporter activity	0.0610329	0.0928571	1.52759e-07	213	13	140	GO:0015399	GO:MF	25177	2532
LHA	inorganic molecular entity transmembrane transporter activity	0.117371	0.0388802	1.78761e-07	213	25	643	GO:0015318	GO:MF	25177	2484
LHA	electron transfer activity	0.0422535	0.169811	4.17842e-07	213	9	53	GO:0009055	GO:MF	25177	2138
LHA	protein binding	0.624413	0.0126775	4.91924e-07	213	133	10491	GO:0005515	GO:MF	25177	1496
LHA	monoatomic ion transmembrane transporter activity	0.117371	0.0360231	8.58735e-07	213	25	694	GO:0015075	GO:MF	25177	2306
LHA	active transmembrane transporter activity	0.0892019	0.0473815	1.1699e-06	213	19	401	GO:0022804	GO:MF	25177	3792
LHA	binding	0.830986	0.0108616	1.3725e-06	213	177	16296	GO:0005488	GO:MF	25177	1484
LHA	enzyme binding	0.220657	0.0203199	8.05635e-06	213	47	2313	GO:0019899	GO:MF	25177	3754
LHA	inorganic cation transmembrane transporter activity	0.0938967	0.0381679	1.66264e-05	213	20	524	GO:0022890	GO:MF	25177	3841
LHA	monoatomic cation transmembrane transporter activity	0.0938967	0.0353357	5.85424e-05	213	20	566	GO:0008324	GO:MF	25177	1662
LHA	NADH dehydrogenase (ubiquinone) activity	0.0234742	0.294118	0.000163578	213	5	17	GO:0008137	GO:MF	25177	1577
LHA	NADH dehydrogenase (quinone) activity	0.0234742	0.277778	0.000224937	213	5	18	GO:0050136	GO:MF	25177	7476
LHA	ion binding	0.389671	0.0138819	0.000343828	213	83	5979	GO:0043167	GO:MF	25177	5760
LHA	NADH dehydrogenase activity	0.0234742	0.238095	0.00052329	213	5	21	GO:0003954	GO:MF	25177	470
LHA	NAD(P)H dehydrogenase (quinone) activity	0.0234742	0.238095	0.00052329	213	5	21	GO:0003955	GO:MF	25177	471
LHA	active monoatomic ion transmembrane transporter activity	0.0516432	0.0506912	0.00181266	213	11	217	GO:0022853	GO:MF	25177	3816
LHA	channel activity	0.0751174	0.0331263	0.0027638	213	16	483	GO:0015267	GO:MF	25177	2454
LHA	passive transmembrane transporter activity	0.0751174	0.0331263	0.0027638	213	16	483	GO:0022803	GO:MF	25177	3791
LHA	kinase binding	0.103286	0.0253749	0.00338835	213	22	867	GO:0019900	GO:MF	25177	3755
LHA	cation binding	0.29108	0.0146434	0.00371952	213	62	4234	GO:0043169	GO:MF	25177	5762
LHA	salt transmembrane transporter activity	0.0798122	0.0299824	0.0051305	213	17	567	GO:1901702	GO:MF	25177	10998
LHA	cell adhesion molecule binding	0.056338	0.0410959	0.00550358	213	12	292	GO:0050839	GO:MF	25177	7987
LHA	metal ion binding	0.28169	0.0145208	0.00735512	213	60	4132	GO:0046872	GO:MF	25177	6281
LHA	oxidoreductase activity, acting on NAD(P)H, quinone or similar compound as acceptor	0.0234742	0.138889	0.00874365	213	5	36	GO:0016655	GO:MF	25177	2896
LHA	monoatomic ion channel activity	0.0657277	0.032634	0.0132661	213	14	429	GO:0005216	GO:MF	25177	1359
LHA	cytochrome-c oxidase activity	0.0140845	0.428571	0.0141529	213	3	7	GO:0004129	GO:MF	25177	614
LHA	ligand-gated monoatomic ion channel activity involved in regulation of presynaptic membrane potential	0.0187793	0.2	0.0150666	213	4	20	GO:0099507	GO:MF	25177	9312
LHA	oxidoreductase activity, acting on NAD(P)H	0.028169	0.0857143	0.0198184	213	6	70	GO:0016651	GO:MF	25177	2893
LHA	oxidoreductase activity, acting on a heme group of donors	0.0140845	0.375	0.0225033	213	3	8	GO:0016675	GO:MF	25177	2910
LHA	protein kinase binding	0.0892019	0.024453	0.025564	213	19	777	GO:0019901	GO:MF	25177	3756
LHA	oxidoreductase activity	0.0892019	0.0243278	0.0273906	213	19	781	GO:0016491	GO:MF	25177	2828
LHA	sodium ion transmembrane transporter activity	0.0375587	0.0526316	0.0330227	213	8	152	GO:0015081	GO:MF	25177	2310
LHA	proton transmembrane transporter activity	0.0328638	0.0608696	0.0394839	213	7	115	GO:0015078	GO:MF	25177	2307
LHA	PDZ domain binding	0.0328638	0.059322	0.0465082	213	7	118	GO:0030165	GO:MF	25177	3872
LHA	monoatomic ion gated channel activity	0.0516432	0.0357143	0.0472739	213	11	308	GO:0022839	GO:MF	25177	3806
LHA	G protein-coupled neurotransmitter receptor activity involved in regulation of presynaptic membrane potential	0.00938967	1	0.0494723	213	2	2	GO:0150047	GO:MF	25177	10933
LHA	Mitochondrial inheritance	0.113924	0.529412	1.18474e-09	79	9	17	HP:0001427	HP	4965	1069
LHA	Centrocecal scotoma	0.101266	0.615385	4.54999e-09	79	8	13	HP:0000576	HP	4965	445
LHA	Leber optic atrophy	0.0886076	0.7	2.99745e-08	79	7	10	HP:0001112	HP	4965	872
LHA	Stuttering	0.101266	0.5	4.37839e-08	79	8	16	HP:0025268	HP	4965	9711
LHA	Ragged-red muscle fibers	0.139241	0.244444	7.00316e-08	79	11	45	HP:0003200	HP	4965	2308
LHA	Central retinal vessel vascular tortuosity	0.0886076	0.583333	1.92836e-07	79	7	12	HP:0007768	HP	4965	4955
LHA	Retinal arterial tortuosity	0.0886076	0.583333	1.92836e-07	79	7	12	HP:0000631	HP	4965	491
LHA	Ventricular preexcitation	0.113924	0.321429	2.92392e-07	79	9	28	HP:0004309	HP	4965	3010
LHA	Mitochondrial respiratory chain defects	0.101266	0.4	4.07136e-07	79	8	20	HP:0200125	HP	4965	16010
LHA	Stroke-like episode	0.101266	0.380952	6.49306e-07	79	8	21	HP:0002401	HP	4965	1758
LHA	Blurred vision	0.126582	0.238095	7.46006e-07	79	10	42	HP:0000622	HP	4965	485
LHA	Episodic vomiting	0.126582	0.222222	1.55659e-06	79	10	45	HP:0002572	HP	4965	1859
LHA	Encephalopathy	0.265823	0.0719178	3.10586e-06	79	21	292	HP:0001298	HP	4965	986
LHA	Multiple glomerular cysts	0.0759494	0.6	3.51938e-06	79	6	10	HP:0100611	HP	4965	15607
LHA	Mixed demyelinating and axonal polyneuropathy	0.0759494	0.6	3.51938e-06	79	6	10	HP:0007327	HP	4965	4683
LHA	Retinal telangiectasia	0.101266	0.307692	4.67555e-06	79	8	26	HP:0007763	HP	4965	4952
LHA	Widened cerebral subarachnoid space	0.0759494	0.545455	7.64497e-06	79	6	11	HP:0012766	HP	4965	9156
LHA	Low plasma citrulline	0.0759494	0.545455	7.64497e-06	79	6	11	HP:0003572	HP	4965	2568
LHA	Mitochondrial myopathy	0.126582	0.181818	1.25595e-05	79	10	55	HP:0003737	HP	4965	2647
LHA	Abnormal speech prosody	0.0886076	0.35	1.70395e-05	79	7	20	HP:0031434	HP	4965	11495
LHA	Bilateral tonic-clonic seizure	0.265823	0.0638298	2.67277e-05	79	21	329	HP:0002069	HP	4965	1521
LHA	Distal peripheral sensory neuropathy	0.0759494	0.461538	2.76839e-05	79	6	13	HP:0007067	HP	4965	4572
LHA	Slow decrease in visual acuity	0.101266	0.242424	3.79864e-05	79	8	33	HP:0007924	HP	4965	5033
LHA	Concentric hypertrophic cardiomyopathy	0.0759494	0.428571	4.7836e-05	79	6	14	HP:0005157	HP	4965	3494
LHA	Wolff-Parkinson-White syndrome	0.0886076	0.304348	5.18601e-05	79	7	23	HP:0001716	HP	4965	1255
LHA	Arterial tortuosity	0.0886076	0.304348	5.18601e-05	79	7	23	HP:0005116	HP	4965	3473
LHA	Bipolar affective disorder	0.101266	0.228571	6.27631e-05	79	8	35	HP:0007302	HP	4965	4674
LHA	Abnormality of Krebs cycle metabolism	0.0759494	0.4	7.87214e-05	79	6	15	HP:0000816	HP	4965	634
LHA	Cardiac conduction abnormality	0.177215	0.0921053	0.000102652	79	14	152	HP:0031546	HP	4965	11602
LHA	Aplasia/Hypoplasia of the cerebral white matter	0.0759494	0.375	0.000124366	79	6	16	HP:0012429	HP	4965	8823
LHA	Abnormal circulating citrulline concentration	0.0759494	0.375	0.000124366	79	6	16	HP:0011965	HP	4965	8367
LHA	Vascular tortuosity	0.0886076	0.269231	0.000133915	79	7	26	HP:0004948	HP	4965	3387
LHA	Focal segmental glomerulosclerosis	0.126582	0.142857	0.000140614	79	10	70	HP:0000097	HP	4965	87
LHA	Abnormal renal corpuscle morphology	0.189873	0.0824176	0.000147958	79	15	182	HP:0031263	HP	4965	11330
LHA	Abnormal mitochondria in muscle tissue	0.101266	0.205128	0.000155865	79	8	39	HP:0008316	HP	4965	5260
LHA	Vitiligo	0.0886076	0.259259	0.00017849	79	7	27	HP:0001045	HP	4965	817
LHA	Progressive external ophthalmoplegia	0.0886076	0.259259	0.00017849	79	7	27	HP:0000590	HP	4965	457
LHA	Impaired visuospatial constructive cognition	0.0886076	0.259259	0.00017849	79	7	27	HP:0010794	HP	4965	7228
LHA	Episodic respiratory distress	0.0759494	0.352941	0.00018978	79	6	17	HP:0004885	HP	4965	3339
LHA	Bulbar signs	0.101266	0.2	0.00019235	79	8	40	HP:0002483	HP	4965	1800
LHA	Abnormal renal cortex morphology	0.202532	0.0733945	0.000266731	79	16	218	HP:0011035	HP	4965	7458
LHA	Mania	0.101266	0.190476	0.000287739	79	8	42	HP:0100754	HP	4965	15734
LHA	Muscle abnormality related to mitochondrial dysfunction	0.126582	0.128205	0.000402614	79	10	78	HP:0003800	HP	4965	2686
LHA	Segmental peripheral demyelination/remyelination	0.0759494	0.315789	0.000405633	79	6	19	HP:0003481	HP	4965	2512
LHA	Fluctuations in consciousness	0.0759494	0.315789	0.000405633	79	6	19	HP:0007159	HP	4965	4611
LHA	Optic neuropathy	0.113924	0.147541	0.000480972	79	9	61	HP:0001138	HP	4965	892
LHA	Abnormal renal glomerulus morphology	0.177215	0.0773481	0.000909536	79	14	181	HP:0000095	HP	4965	85
LHA	Psychotic mentation	0.0759494	0.272727	0.00107385	79	6	22	HP:0001345	HP	4965	1019
LHA	Central scotoma	0.101266	0.16	0.00118125	79	8	50	HP:0000603	HP	4965	468
LHA	Proximal tubulopathy	0.101266	0.16	0.00118125	79	8	50	HP:0000114	HP	4965	100
LHA	Recurrent pancreatitis	0.0759494	0.26087	0.00143456	79	6	23	HP:0100027	HP	4965	15042
LHA	Aphasia	0.126582	0.111111	0.00156968	79	10	90	HP:0002381	HP	4965	1748
LHA	Increased CSF protein concentration	0.101266	0.153846	0.00161384	79	8	52	HP:0002922	HP	4965	2120
LHA	Abnormal nephron morphology	0.202532	0.064	0.00172599	79	16	250	HP:0012575	HP	4965	8967
LHA	Lacticaciduria	0.0759494	0.25	0.00188865	79	6	24	HP:0003648	HP	4965	2599
LHA	Abnormal circulating non-proteinogenic amino acid concentration	0.0759494	0.25	0.00188865	79	6	24	HP:0033109	HP	4965	13102
LHA	Abnormal CSF protein concentration	0.101266	0.148148	0.00217483	79	8	54	HP:0025456	HP	4965	9886
LHA	Progressive sensorineural hearing impairment	0.0886076	0.184211	0.002204	79	7	38	HP:0000408	HP	4965	316
LHA	EEG abnormality	0.291139	0.0456349	0.00238174	79	23	504	HP:0002353	HP	4965	1727
LHA	Recurrent paroxysmal headache	0.0759494	0.24	0.00245376	79	6	25	HP:0002331	HP	4965	1711
LHA	Retinal vascular tortuosity	0.101266	0.142857	0.00289402	79	8	56	HP:0012841	HP	4965	9231
LHA	Basal ganglia calcification	0.0886076	0.175	0.00317378	79	7	40	HP:0002135	HP	4965	1569
LHA	Intestinal pseudo-obstruction	0.0759494	0.222222	0.00399863	79	6	27	HP:0004389	HP	4965	3079
LHA	Abnormal muscle fiber morphology	0.189873	0.0638298	0.00403902	79	15	235	HP:0004303	HP	4965	3005
LHA	Glomerular sclerosis	0.126582	0.1	0.00417853	79	10	100	HP:0000096	HP	4965	86
LHA	Myoclonus	0.227848	0.0530973	0.00513024	79	18	339	HP:0001336	HP	4965	1010
LHA	Abnormality of central nervous system electrophysiology	0.291139	0.0432331	0.00608073	79	23	532	HP:0030178	HP	4965	10315
LHA	Scotoma	0.113924	0.109756	0.00620843	79	9	82	HP:0000575	HP	4965	444
LHA	Polyneuropathy	0.101266	0.129032	0.00637846	79	8	62	HP:0001271	HP	4965	968
LHA	Postural tremor	0.101266	0.126984	0.00721317	79	8	63	HP:0002174	HP	4965	1602
LHA	Abnormal basal ganglia morphology	0.164557	0.0698925	0.00745903	79	13	186	HP:0002134	HP	4965	1568
LHA	Focal T2 hyperintense basal ganglia lesion	0.0886076	0.152174	0.0084396	79	7	46	HP:0007183	HP	4965	4620
LHA	Hypothermia	0.0886076	0.148936	0.0097907	79	7	47	HP:0002045	HP	4965	1501
LHA	Dilated cardiomyopathy	0.151899	0.0731707	0.0111258	79	12	164	HP:0001644	HP	4965	1198
LHA	Progressive hearing impairment	0.0886076	0.145833	0.0113169	79	7	48	HP:0001730	HP	4965	1262
LHA	Personality changes	0.0886076	0.145833	0.0113169	79	7	48	HP:0000751	HP	4965	587
LHA	Hemiparesis	0.126582	0.0892857	0.0117132	79	10	112	HP:0001269	HP	4965	966
LHA	Abnormal left ventricular function	0.126582	0.0892857	0.0117132	79	10	112	HP:0005162	HP	4965	3496
LHA	Sensorimotor neuropathy	0.113924	0.1	0.0135024	79	9	90	HP:0007141	HP	4965	4605
LHA	Hemiplegia/hemiparesis	0.177215	0.0614035	0.0141848	79	14	228	HP:0004374	HP	4965	3064
LHA	Elevated brain lactate level by MRS	0.0759494	0.176471	0.016626	79	6	34	HP:0012707	HP	4965	9097
LHA	Mental deterioration	0.21519	0.0508982	0.0177221	79	17	334	HP:0001268	HP	4965	965
LHA	Abnormal brain lactate level by MRS	0.0759494	0.171429	0.0198134	79	6	35	HP:0025045	HP	4965	9504
LHA	Infantile spasms	0.126582	0.0826446	0.0233314	79	10	121	HP:0012469	HP	4965	8861
LHA	Fever	0.227848	0.0471204	0.0272423	79	18	382	HP:0001945	HP	4965	1415
LHA	Short attention span	0.240506	0.0452381	0.0272495	79	19	420	HP:0000736	HP	4965	573
LHA	Widened subarachnoid space	0.0759494	0.162162	0.0276684	79	6	37	HP:0012704	HP	4965	9094
LHA	Hypoparathyroidism	0.0759494	0.162162	0.0276684	79	6	37	HP:0000829	HP	4965	646
LHA	Hyperventilation	0.0759494	0.162162	0.0276684	79	6	37	HP:0002883	HP	4965	2089
LHA	Psychosis	0.126582	0.08	0.0310705	79	10	125	HP:0000709	HP	4965	552
LHA	Upper motor neuron dysfunction	0.443038	0.0304083	0.0314396	79	35	1151	HP:0002493	HP	4965	1807
LHA	Exercise intolerance	0.113924	0.0891089	0.0346679	79	9	101	HP:0003546	HP	4965	2546
LHA	Abnormal head blood vessel morphology	0.101266	0.102564	0.0360306	79	8	78	HP:3000036	HP	4965	16639
LHA	Cerebral visual impairment	0.139241	0.0709677	0.0366417	79	11	155	HP:0100704	HP	4965	15690
LHA	Abnormal subarachnoid space morphology	0.101266	0.101266	0.0395798	79	8	79	HP:0012703	HP	4965	9093
LHA	Abnormal basal ganglia MRI signal intensity	0.0886076	0.12069	0.0406755	79	7	58	HP:0012751	HP	4965	9141
LHA	Abnormal cardiac ventricular function	0.126582	0.0769231	0.0437666	79	10	130	HP:0030872	HP	4965	10967
LHA	Dyskinesia	0.151899	0.0631579	0.0494366	79	12	190	HP:0100660	HP	4965	15653
LHA	Diabetic cardiomyopathy	0.125	0.0735294	7.54962e-06	120	15	204	KEGG:05415	KEGG	8947	485
LHA	Oxidative phosphorylation	0.1	0.0902256	1.78539e-05	120	12	133	KEGG:00190	KEGG	8947	18
LHA	Chemical carcinogenesis - reactive oxygen species	0.125	0.0681818	2.03707e-05	120	15	220	KEGG:05208	KEGG	8947	453
LHA	Huntington disease	0.141667	0.0566667	4.26747e-05	120	17	300	KEGG:05016	KEGG	8947	407
LHA	Thermogenesis	0.116667	0.0614035	0.000187322	120	14	228	KEGG:04714	KEGG	8947	343
LHA	Alzheimer disease	0.15	0.0473684	0.000257697	120	18	380	KEGG:05010	KEGG	8947	404
LHA	Pathways of neurodegeneration - multiple diseases	0.166667	0.0426439	0.000341503	120	20	469	KEGG:05022	KEGG	8947	410
LHA	Retrograde endocannabinoid signaling	0.0916667	0.0753425	0.000355926	120	11	146	KEGG:04723	KEGG	8947	347
LHA	Prion disease	0.116667	0.0526316	0.00112156	120	14	266	KEGG:05020	KEGG	8947	409
LHA	GnRH secretion	0.0583333	0.112903	0.00164109	120	7	62	KEGG:04929	KEGG	8947	379
LHA	Amyotrophic lateral sclerosis	0.133333	0.0437158	0.00263905	120	16	366	KEGG:05014	KEGG	8947	406
LHA	Thyroid hormone signaling pathway	0.075	0.075	0.00292583	120	9	120	KEGG:04919	KEGG	8947	369
LHA	Parkinson disease	0.108333	0.0496183	0.00434533	120	13	262	KEGG:05012	KEGG	8947	405
LHA	Rap1 signaling pathway	0.0916667	0.0514019	0.0125767	120	11	214	KEGG:04015	KEGG	8947	243
LHA	Long-term depression	0.05	0.1	0.0133552	120	6	60	KEGG:04730	KEGG	8947	353
LHA	Metabolic pathways	0.316667	0.0236025	0.0176393	120	38	1610	KEGG:01100	KEGG	8947	181
LHA	Long-term potentiation	0.05	0.0909091	0.022704	120	6	66	KEGG:04720	KEGG	8947	344
LHA	Circadian entrainment	0.0583333	0.0714286	0.0310188	120	7	98	KEGG:04713	KEGG	8947	342
LHA	Serotonergic synapse	0.0666667	0.0610687	0.0340268	120	8	131	KEGG:04726	KEGG	8947	350
LHA	Aldosterone synthesis and secretion	0.0583333	0.0693069	0.03731	120	7	101	KEGG:04925	KEGG	8947	375
LHA	Carbohydrate digestion and absorption	0.0416667	0.104167	0.0404494	120	5	48	KEGG:04973	KEGG	8947	397
LHA	mmu-miR-7b-5p	0.160839	0.0507726	0.00434117	143	23	453	MIRNA:mmu-miR-7b-5p	MIRNA	7220	1993
LHA	mmu-miR-223-3p	0.125874	0.0582524	0.00619357	143	18	309	MIRNA:mmu-miR-223-3p	MIRNA	7220	1339
LHA	Respiratory electron transport, ATP synthesis by chemiosmotic coupling, and heat production by uncoupling proteins.	0.0887097	0.0973451	0.000233861	124	11	113	REAC:R-MMU-163200	REAC	8362	1289
LHA	Metallothioneins bind metals	0.0241935	1	0.000941879	124	3	3	REAC:R-MMU-5661231	REAC	8362	827
LHA	Response to metal ions	0.0241935	1	0.000941879	124	3	3	REAC:R-MMU-5660526	REAC	8362	1291
LHA	The citric acid (TCA) cycle and respiratory electron transport	0.0967742	0.0754717	0.00110601	124	12	159	REAC:R-MMU-1428517	REAC	8362	1554
LHA	Respiratory electron transport	0.0725806	0.1	0.00197108	124	9	90	REAC:R-MMU-611105	REAC	8362	1288
LHA	Factor: MOVO-B; motif: GNGGGGG	0.550926	0.0155271	1.59153e-06	216	119	7664	TF:M01104	TF	21866	2110
LHA	Factor: ZF5; motif: GYCGCGCARNGCNN	0.634259	0.0143757	3.99493e-06	216	137	9530	TF:M02933	TF	21866	3838
LHA	Factor: AHR; motif: CACGCN	0.569444	0.0144655	7.0967e-05	216	123	8503	TF:M01855	TF	21866	16
LHA	Factor: AP-2alpha; motif: NGCCYSNNGSN	0.453704	0.0158243	8.59228e-05	216	98	6193	TF:M01857	TF	21866	98
LHA	Factor: MOVO-B; motif: GNGGGGG; match class: 1	0.291667	0.0191956	9.93369e-05	216	63	3282	TF:M01104_1	TF	21866	2111
LHA	Factor: Kaiso; motif: GCMGGGRGCRGS; match class: 1	0.435185	0.0160136	0.000113841	216	94	5870	TF:M03876_1	TF	21866	1819
LHA	Factor: Sp1; motif: GGGGCGGGGC	0.574074	0.0142775	0.000135353	216	124	8685	TF:M00931	TF	21866	3236
LHA	Factor: E2F-3; motif: GGCGGGN	0.689815	0.0131823	0.000217231	216	149	11303	TF:M02089	TF	21866	752
LHA	Factor: Sp1; motif: NNGGGGCGGGGNN	0.583333	0.0140515	0.000255293	216	126	8967	TF:M00932	TF	21866	3232
LHA	Factor: ZF5; motif: NRNGNGCGCGCWN; match class: 1	0.685185	0.0131849	0.000265358	216	148	11225	TF:M00333_1	TF	21866	3827
LHA	Factor: E2F; motif: GGCGSG; match class: 1	0.490741	0.0150078	0.000274227	216	106	7063	TF:M00803_1	TF	21866	775
LHA	Factor: ZF5; motif: GSGCGCGR; match class: 1	0.722222	0.0128979	0.000279907	216	156	12095	TF:M00716_1	TF	21866	3825
LHA	Factor: WT1; motif: CGCCCCCNCN	0.513889	0.0147117	0.000307619	216	111	7545	TF:M02036	TF	21866	3742
LHA	Factor: Zic1; motif: NNCCCCCGGGGGGG; match class: 1	0.467593	0.0152614	0.000307878	216	101	6618	TF:M02835_1	TF	21866	4123
LHA	Factor: E2F; motif: GGCGSG	0.648148	0.0133971	0.000414132	216	140	10450	TF:M00803	TF	21866	774
LHA	Factor: Kaiso; motif: SARNYCTCGCGAGAN	0.777778	0.012426	0.000488912	216	168	13520	TF:M10276	TF	21866	3790
LHA	Factor: Zic1; motif: NNCCCCCGGGGGGG	0.606481	0.0137044	0.000500211	216	131	9559	TF:M02835	TF	21866	4122
LHA	Factor: ZF5; motif: GYCGCGCARNGCNN; match class: 1	0.421296	0.0155502	0.000905698	216	91	5852	TF:M02933_1	TF	21866	3839
LHA	Factor: AP-2gamma; motif: GCCYNNGGS	0.481481	0.0147748	0.000946887	216	104	7039	TF:M00470	TF	21866	102
LHA	Factor: Sp1; motif: NGGGGCGGGGN	0.583333	0.0137675	0.000954724	216	126	9152	TF:M07395	TF	21866	3230
LHA	Factor: Sp1; motif: GGNGGGGGNGGGGGMGGGGCNGGG	0.657407	0.0131725	0.000956939	216	142	10780	TF:M10375	TF	21866	3226
LHA	Factor: FOXN4; motif: NNWANNCGWMCGCGTCNNNNMT	0.87037	0.0117273	0.000959992	216	188	16031	TF:M04662	TF	21866	1156
LHA	Factor: SP1; motif: GGGGYGGGGNS	0.486111	0.0146382	0.00128403	216	105	7173	TF:M01303	TF	21866	3224
LHA	Factor: Kaiso; motif: GCMGGGRGCRGS	0.671296	0.0129835	0.00156027	216	145	11168	TF:M03876	TF	21866	1818
LHA	Factor: FOXN4; motif: NNWANNCGWMCGCGTCNNNNMT; match class: 1	0.740741	0.0124971	0.00170217	216	160	12803	TF:M04662_1	TF	21866	1157
LHA	Factor: Sp1; motif: CCCCGCCCCN	0.560185	0.0137656	0.00234835	216	121	8790	TF:M00933	TF	21866	3228
LHA	Factor: Kaiso; motif: SARNYCTCGCGAGAN; match class: 1	0.615741	0.0133106	0.00240442	216	133	9992	TF:M10276_1	TF	21866	3791
LHA	Factor: NGFI-C; motif: WTGCGTGGGYGG	0.37037	0.0158951	0.00295318	216	80	5033	TF:M00244	TF	21866	2356
LHA	Factor: E2F-1; motif: GNGGGCGGGRMN	0.796296	0.012049	0.00345113	216	172	14275	TF:M10209	TF	21866	728
LHA	Factor: GKLF; motif: NNNRGGNGNGGSN	0.837963	0.0117954	0.00345261	216	181	15345	TF:M07289	TF	21866	1350
LHA	Factor: ZF5; motif: NRNGNGCGCGCWN	0.805556	0.0119926	0.00345579	216	174	14509	TF:M00333	TF	21866	3826
LHA	Factor: ZF5; motif: GSGCGCGR	0.819444	0.0119032	0.00359956	216	177	14870	TF:M00716	TF	21866	3824
LHA	Factor: E2F-4; motif: GCGGGAAANA	0.62963	0.0131185	0.00375067	216	136	10367	TF:M02090	TF	21866	762
LHA	Factor: MYF6; motif: NNNRACAGNCNCNCC	0.796296	0.0120179	0.0043812	216	172	14312	TF:M02885	TF	21866	2192
LHA	Factor: BEN; motif: CAGCGRNV	0.87037	0.0115529	0.00516139	216	188	16273	TF:M01240	TF	21866	278
LHA	Factor: AP2; motif: GCCYGSGGSN	0.481481	0.0142642	0.00578673	216	104	7291	TF:M08867	TF	21866	116
LHA	Factor: AP-2; motif: MKCCCSCNGGCG; match class: 1	0.291667	0.0171149	0.00578922	216	63	3681	TF:M00189_1	TF	21866	119
LHA	Factor: E2F-3; motif: GGCGGGN; match class: 1	0.462963	0.014455	0.00580305	216	100	6918	TF:M02089_1	TF	21866	753
LHA	Factor: E2F-1; motif: GNGGGCGGGRMN; match class: 1	0.638889	0.0129492	0.00637842	216	138	10657	TF:M10209_1	TF	21866	729
LHA	Factor: slug; motif: RRCAGGTGCNN	0.180556	0.0208891	0.00817468	216	39	1867	TF:M10370	TF	21866	3040
LHA	Factor: Sp1; motif: NGGGGGCGGGGYN	0.550926	0.0134967	0.0101378	216	119	8817	TF:M00196	TF	21866	3234
LHA	Factor: Egr-3; motif: NTGCGTGGGCGK	0.416667	0.014788	0.0105377	216	90	6086	TF:M00245	TF	21866	850
LHA	Factor: AP-2; motif: SNNNCCNCAGGCN	0.467593	0.0141635	0.0131409	216	101	7131	TF:M00915	TF	21866	120
LHA	Factor: CTCF; motif: NAGGGGGCGCNNKNNNN; match class: 1	0.574074	0.0132224	0.0153202	216	124	9378	TF:M08995_1	TF	21866	613
LHA	Factor: Egr-1; motif: NNGCGKGGGCGGGG	0.324074	0.0158586	0.0202512	216	70	4414	TF:M10213	TF	21866	832
LHA	Factor: Osx; motif: CCNCCCCCNNN	0.416667	0.0145631	0.0203217	216	90	6180	TF:M07329	TF	21866	2550
LHA	Factor: BEN; motif: CAGCGRNV; match class: 1	0.689815	0.0123888	0.0230791	216	149	12027	TF:M01240_1	TF	21866	279
LHA	Factor: AP-2; motif: MKCCCSCNGGCG	0.509259	0.013624	0.0232149	216	110	8074	TF:M00189	TF	21866	118
LHA	Factor: BTEB2; motif: RGGGNGKGGN	0.486111	0.0137831	0.0267036	216	105	7618	TF:M07277	TF	21866	332
LHA	Factor: Tfap2a; motif: TGCCCYNRGGGCA	0.537037	0.0133594	0.0273389	216	116	8683	TF:M04157	TF	21866	3624
LHA	Factor: E2F-2; motif: NNNANGGCGCGCNNN	0.273148	0.016662	0.0302322	216	59	3541	TF:M02742	TF	21866	742
LHA	Factor: Zic3; motif: NMCCCCCGGGGGGGN	0.259259	0.016898	0.0354163	216	56	3314	TF:M02837	TF	21866	4128
LHA	Factor: Hoxa2; motif: NNTAATTANN	0.087963	0.0290076	0.0396991	216	19	655	TF:M04368	TF	21866	1598
LHA	Factor: MYF6; motif: NNNRACAGNCNCNCC; match class: 1	0.453704	0.0139284	0.0437696	216	98	7036	TF:M02885_1	TF	21866	2193
LHA	Factor: WT1; motif: GNGGGGGCGGGG	0.435185	0.0140845	0.0468616	216	94	6674	TF:M03893	TF	21866	3744
LHA	Electron transport chain	0.129412	0.119565	3.53539e-05	85	11	92	WP:WP295	WP	4531	5
LHA	Oxidative phosphorylation	0.0823529	0.12963	0.00238411	85	7	54	WP:WP1248	WP	4531	98
MnPO	Cytochrome c oxidase, mitochondrial	0.0482759	0.583333	0.00758149	145	7	12	CORUM:538	CORUM	1082	91
MnPO	localization	0.362142	0.124385	5.37079e-60	1886	683	5491	GO:0051179	GO:BP	27205	14323
MnPO	nervous system development	0.21474	0.158513	1.43849e-57	1886	405	2555	GO:0007399	GO:BP	27205	2969
MnPO	establishment of localization	0.320785	0.125441	2.49983e-52	1886	605	4823	GO:0051234	GO:BP	27205	14353
MnPO	transport	0.312831	0.126501	6.28569e-52	1886	590	4664	GO:0006810	GO:BP	27205	2546
MnPO	system development	0.282609	0.129526	7.9184e-49	1886	533	4115	GO:0048731	GO:BP	27205	13728
MnPO	generation of neurons	0.152174	0.175966	6.78867e-48	1886	287	1631	GO:0048699	GO:BP	27205	13696
MnPO	neurogenesis	0.165429	0.166756	2.3963e-47	1886	312	1871	GO:0022008	GO:BP	27205	6923
MnPO	neuron differentiation	0.145811	0.176849	4.34155e-46	1886	275	1555	GO:0030182	GO:BP	27205	7062
MnPO	regulation of biological quality	0.235419	0.136868	2.5413e-45	1886	444	3244	GO:0065008	GO:BP	27205	16812
MnPO	multicellular organism development	0.312831	0.121075	2.55301e-45	1886	590	4873	GO:0007275	GO:BP	27205	2871
MnPO	regulation of cellular process	0.611347	0.0936789	1.80264e-43	1886	1153	12308	GO:0050794	GO:BP	27205	14008
MnPO	neuron development	0.125663	0.187204	2.2009e-43	1886	237	1266	GO:0048666	GO:BP	27205	13664
MnPO	biological regulation	0.665429	0.0906923	7.62477e-43	1886	1255	13838	GO:0065007	GO:BP	27205	16811
MnPO	cellular localization	0.243372	0.131481	2.80664e-42	1886	459	3491	GO:0051641	GO:BP	27205	14642
MnPO	neuron projection development	0.114528	0.194595	6.31752e-42	1886	216	1110	GO:0031175	GO:BP	27205	7471
MnPO	regulation of biological process	0.647402	0.0909565	5.52785e-41	1886	1221	13424	GO:0050789	GO:BP	27205	14004
MnPO	organonitrogen compound metabolic process	0.376458	0.109416	1.30136e-40	1886	710	6489	GO:1901564	GO:BP	27205	22563
MnPO	developmental process	0.391835	0.107647	2.79659e-40	1886	739	6865	GO:0032502	GO:BP	27205	8032
MnPO	anatomical structure development	0.362672	0.109827	4.38057e-39	1886	684	6228	GO:0048856	GO:BP	27205	13840
MnPO	cellular component organization or biogenesis	0.42789	0.102999	6.53216e-38	1886	807	7835	GO:0071840	GO:BP	27205	17895
MnPO	synapse organization	0.0699894	0.248588	6.69092e-36	1886	132	531	GO:0050808	GO:BP	27205	14020
MnPO	regulation of localization	0.174443	0.14348	7.82424e-36	1886	329	2293	GO:0032879	GO:BP	27205	8303
MnPO	trans-synaptic signaling	0.0954401	0.199557	7.84336e-36	1886	180	902	GO:0099537	GO:BP	27205	20178
MnPO	cell projection morphogenesis	0.083245	0.218056	1.12699e-35	1886	157	720	GO:0048858	GO:BP	27205	13842
MnPO	positive regulation of cellular process	0.346766	0.109055	1.16472e-35	1886	654	5997	GO:0048522	GO:BP	27205	13543
MnPO	plasma membrane bounded cell projection morphogenesis	0.0827147	0.218487	1.54532e-35	1886	156	714	GO:0120039	GO:BP	27205	20550
MnPO	neuron projection morphogenesis	0.0816543	0.220315	1.68253e-35	1886	154	699	GO:0048812	GO:BP	27205	13798
MnPO	plasma membrane bounded cell projection organization	0.138388	0.159829	2.36784e-35	1886	261	1633	GO:0120036	GO:BP	27205	20549
MnPO	regulation of cellular component organization	0.188229	0.13749	4.48485e-35	1886	355	2582	GO:0051128	GO:BP	27205	14274
MnPO	cell part morphogenesis	0.0843054	0.211718	1.63906e-34	1886	159	751	GO:0032990	GO:BP	27205	8398
MnPO	synaptic signaling	0.0965005	0.193411	2.35326e-34	1886	182	941	GO:0099536	GO:BP	27205	20177
MnPO	cell projection organization	0.138918	0.15698	4.0239e-34	1886	262	1669	GO:0030030	GO:BP	27205	7016
MnPO	chemical synaptic transmission	0.0933192	0.196648	4.35717e-34	1886	176	895	GO:0007268	GO:BP	27205	2865
MnPO	anterograde trans-synaptic signaling	0.0933192	0.196648	4.35717e-34	1886	176	895	GO:0098916	GO:BP	27205	20010
MnPO	regulation of cell communication	0.234358	0.123671	1.5092e-33	1886	442	3574	GO:0010646	GO:BP	27205	4388
MnPO	regulation of signaling	0.233828	0.123529	2.48795e-33	1886	441	3570	GO:0023051	GO:BP	27205	7001
MnPO	cellular component organization	0.410923	0.10152	2.98576e-33	1886	775	7634	GO:0016043	GO:BP	27205	5200
MnPO	positive regulation of biological process	0.372747	0.104427	8.18056e-33	1886	703	6732	GO:0048518	GO:BP	27205	13539
MnPO	cellular component morphogenesis	0.0885472	0.19624	4.63068e-32	1886	167	851	GO:0032989	GO:BP	27205	8397
MnPO	macromolecule localization	0.208378	0.127597	5.1989e-32	1886	393	3080	GO:0033036	GO:BP	27205	8425
MnPO	cell morphogenesis	0.100742	0.181298	5.23993e-32	1886	190	1048	GO:0000902	GO:BP	27205	249
MnPO	regulation of transport	0.150053	0.146632	9.32505e-32	1886	283	1930	GO:0051049	GO:BP	27205	14219
MnPO	cell junction organization	0.0848356	0.200501	9.57964e-32	1886	160	798	GO:0034330	GO:BP	27205	9021
MnPO	cell morphogenesis involved in neuron differentiation	0.0742312	0.217729	2.0438e-31	1886	140	643	GO:0048667	GO:BP	27205	13665
MnPO	establishment of localization in cell	0.163309	0.140191	2.99237e-31	1886	308	2197	GO:0051649	GO:BP	27205	14650
MnPO	cellular process	0.870095	0.0791568	1.13663e-30	1886	1641	20731	GO:0009987	GO:BP	27205	3889
MnPO	protein localization	0.181336	0.132507	2.79265e-30	1886	342	2581	GO:0008104	GO:BP	27205	3195
MnPO	cellular macromolecule localization	0.181336	0.132097	5.19107e-30	1886	342	2589	GO:0070727	GO:BP	27205	17211
MnPO	protein metabolic process	0.316543	0.10749	1.42368e-29	1886	597	5554	GO:0019538	GO:BP	27205	6189
MnPO	cell-cell signaling	0.136797	0.147597	5.17399e-29	1886	258	1748	GO:0007267	GO:BP	27205	2864
MnPO	negative regulation of cellular process	0.287911	0.109146	9.7934e-28	1886	543	4975	GO:0048523	GO:BP	27205	13544
MnPO	modulation of chemical synaptic transmission	0.0742312	0.200861	1.6853e-27	1886	140	697	GO:0050804	GO:BP	27205	14016
MnPO	regulation of trans-synaptic signaling	0.0742312	0.200573	1.97066e-27	1886	140	698	GO:0099177	GO:BP	27205	20147
MnPO	cell morphogenesis involved in differentiation	0.0752916	0.196676	6.31775e-27	1886	142	722	GO:0000904	GO:BP	27205	250
MnPO	monoatomic ion transport	0.108165	0.159251	1.55008e-26	1886	204	1281	GO:0006811	GO:BP	27205	2547
MnPO	transmembrane transport	0.123542	0.147749	7.11475e-26	1886	233	1577	GO:0055085	GO:BP	27205	15067
MnPO	monoatomic ion transmembrane transport	0.0911983	0.169291	5.38885e-25	1886	172	1016	GO:0034220	GO:BP	27205	8951
MnPO	cell development	0.199364	0.119783	1.11394e-24	1886	376	3139	GO:0048468	GO:BP	27205	13507
MnPO	negative regulation of biological process	0.325027	0.102167	2.75321e-24	1886	613	6000	GO:0048519	GO:BP	27205	13540
MnPO	organelle organization	0.21527	0.115735	5.50399e-24	1886	406	3508	GO:0006996	GO:BP	27205	2670
MnPO	cell differentiation	0.268293	0.107317	1.78427e-23	1886	506	4715	GO:0030154	GO:BP	27205	7050
MnPO	inorganic ion transmembrane transport	0.083245	0.171024	4.7784e-23	1886	157	918	GO:0098660	GO:BP	27205	19866
MnPO	cellular developmental process	0.268823	0.106782	5.08098e-23	1886	507	4748	GO:0048869	GO:BP	27205	13852
MnPO	localization within membrane	0.0710498	0.18663	5.97825e-23	1886	134	718	GO:0051668	GO:BP	27205	14668
MnPO	regulation of neuron projection development	0.0599152	0.206581	8.72489e-23	1886	113	547	GO:0010975	GO:BP	27205	4665
MnPO	monoatomic cation transport	0.0911983	0.161806	1.12867e-22	1886	172	1063	GO:0006812	GO:BP	27205	2548
MnPO	organic substance transport	0.181336	0.12055	1.84671e-22	1886	342	2837	GO:0071702	GO:BP	27205	17820
MnPO	axonogenesis	0.0551432	0.216216	1.97553e-22	1886	104	481	GO:0007409	GO:BP	27205	2976
MnPO	monoatomic cation transmembrane transport	0.0779427	0.174792	2.18155e-22	1886	147	841	GO:0098655	GO:BP	27205	19861
MnPO	inorganic cation transmembrane transport	0.0752916	0.175743	8.96151e-22	1886	142	808	GO:0098662	GO:BP	27205	19868
MnPO	regulation of plasma membrane bounded cell projection organization	0.0710498	0.181326	1.02758e-21	1886	134	739	GO:0120035	GO:BP	27205	20548
MnPO	protein modification process	0.21527	0.112465	1.81856e-21	1886	406	3610	GO:0036211	GO:BP	27205	10015
MnPO	anatomical structure morphogenesis	0.177094	0.119842	2.25751e-21	1886	334	2787	GO:0009653	GO:BP	27205	3648
MnPO	macromolecule modification	0.223754	0.110907	2.62412e-21	1886	422	3805	GO:0043412	GO:BP	27205	11269
MnPO	vesicle-mediated transport	0.121421	0.138202	2.76156e-21	1886	229	1657	GO:0016192	GO:BP	27205	5292
MnPO	protein localization to cell periphery	0.0466596	0.234667	3.15737e-21	1886	88	375	GO:1990778	GO:BP	27205	26530
MnPO	behavior	0.0715801	0.177632	5.06419e-21	1886	135	760	GO:0007610	GO:BP	27205	3139
MnPO	regulation of cell projection organization	0.0710498	0.177955	6.35352e-21	1886	134	753	GO:0031344	GO:BP	27205	7530
MnPO	axon development	0.0572641	0.202247	6.82429e-21	1886	108	534	GO:0061564	GO:BP	27205	16470
MnPO	intracellular signal transduction	0.165429	0.119678	1.44027e-19	1886	312	2607	GO:0035556	GO:BP	27205	9589
MnPO	metal ion transport	0.078473	0.161572	4.63652e-19	1886	148	916	GO:0030001	GO:BP	27205	7008
MnPO	positive regulation of cellular component organization	0.0965005	0.146067	6.38652e-19	1886	182	1246	GO:0051130	GO:BP	27205	14276
MnPO	intracellular transport	0.113468	0.136219	7.02842e-19	1886	214	1571	GO:0046907	GO:BP	27205	13156
MnPO	regulation of signal transduction	0.181336	0.114688	1.08265e-18	1886	342	2982	GO:0009966	GO:BP	27205	3882
MnPO	phosphate-containing compound metabolic process	0.172322	0.116487	1.25461e-18	1886	325	2790	GO:0006796	GO:BP	27205	2537
MnPO	phosphorus metabolic process	0.173383	0.116246	1.27002e-18	1886	327	2813	GO:0006793	GO:BP	27205	2534
MnPO	regulation of synapse structure or activity	0.0387063	0.246622	1.34796e-18	1886	73	296	GO:0050803	GO:BP	27205	14015
MnPO	protein localization to membrane	0.0615058	0.181534	1.64406e-18	1886	116	639	GO:0072657	GO:BP	27205	18453
MnPO	organonitrogen compound biosynthetic process	0.121421	0.130932	3.54385e-18	1886	229	1749	GO:1901566	GO:BP	27205	22565
MnPO	regulation of synapse organization	0.0376458	0.245675	6.29278e-18	1886	71	289	GO:0050807	GO:BP	27205	14019
MnPO	cell junction assembly	0.0493107	0.203057	8.3753e-18	1886	93	458	GO:0034329	GO:BP	27205	9020
MnPO	establishment of protein localization	0.117709	0.129673	5.3103e-17	1886	222	1712	GO:0045184	GO:BP	27205	12003
MnPO	synapse assembly	0.0307529	0.27619	6.63062e-17	1886	58	210	GO:0007416	GO:BP	27205	2982
MnPO	nitrogen compound transport	0.136267	0.122498	8.76331e-17	1886	257	2098	GO:0071705	GO:BP	27205	17823
MnPO	synaptic vesicle cycle	0.0312831	0.270642	9.34836e-17	1886	59	218	GO:0099504	GO:BP	27205	20162
MnPO	dendrite development	0.0376458	0.234323	1.11386e-16	1886	71	303	GO:0016358	GO:BP	27205	5346
MnPO	export from cell	0.0790032	0.152196	1.13576e-16	1886	149	979	GO:0140352	GO:BP	27205	20837
MnPO	protein localization to cell junction	0.0233298	0.346457	1.50694e-16	1886	44	127	GO:1902414	GO:BP	27205	23300
MnPO	vesicle-mediated transport in synapse	0.0339343	0.25	2.21768e-16	1886	64	256	GO:0099003	GO:BP	27205	20060
MnPO	peptide metabolic process	0.0731707	0.156109	3.08956e-16	1886	138	884	GO:0006518	GO:BP	27205	2293
MnPO	regulation of molecular function	0.158537	0.115444	3.14471e-16	1886	299	2590	GO:0065009	GO:BP	27205	16813
MnPO	regulation of response to stimulus	0.223754	0.104043	5.82995e-16	1886	422	4056	GO:0048583	GO:BP	27205	13594
MnPO	regulation of membrane potential	0.0487805	0.192067	6.95103e-16	1886	92	479	GO:0042391	GO:BP	27205	10714
MnPO	amide metabolic process	0.088017	0.141759	1.07539e-15	1886	166	1171	GO:0043603	GO:BP	27205	11390
MnPO	protein localization to synapse	0.0196182	0.385417	2.12277e-15	1886	37	96	GO:0035418	GO:BP	27205	9510
MnPO	regulation of cellular component biogenesis	0.078473	0.14741	3.00926e-15	1886	148	1004	GO:0044087	GO:BP	27205	11543
MnPO	head development	0.0699894	0.155294	3.13847e-15	1886	132	850	GO:0060322	GO:BP	27205	15367
MnPO	locomotion	0.0991516	0.133571	3.35482e-15	1886	187	1400	GO:0040011	GO:BP	27205	10464
MnPO	cognition	0.0402969	0.211111	3.57541e-15	1886	76	360	GO:0050890	GO:BP	27205	14087
MnPO	central nervous system development	0.0821845	0.143918	4.25981e-15	1886	155	1077	GO:0007417	GO:BP	27205	2983
MnPO	cytoplasmic translation	0.0249205	0.299363	7.3146e-15	1886	47	157	GO:0002181	GO:BP	27205	746
MnPO	protein transport	0.108165	0.12774	1.2068e-14	1886	204	1597	GO:0015031	GO:BP	27205	4917
MnPO	postsynapse organization	0.0318134	0.242915	1.39689e-14	1886	60	247	GO:0099173	GO:BP	27205	20143
MnPO	positive regulation of cell projection organization	0.0445387	0.193103	1.8223e-14	1886	84	435	GO:0031346	GO:BP	27205	7532
MnPO	regulation of transmembrane transport	0.0551432	0.170492	2.41283e-14	1886	104	610	GO:0034762	GO:BP	27205	9198
MnPO	exocytosis	0.0397667	0.205479	2.99469e-14	1886	75	365	GO:0006887	GO:BP	27205	2599
MnPO	brain development	0.0657476	0.155583	3.14907e-14	1886	124	797	GO:0007420	GO:BP	27205	2986
MnPO	cell communication	0.368505	0.0905655	4.9701e-14	1886	695	7674	GO:0007154	GO:BP	27205	2781
MnPO	positive regulation of transport	0.0800636	0.141121	7.23958e-14	1886	151	1070	GO:0051050	GO:BP	27205	14220
MnPO	secretion by cell	0.0715801	0.148026	7.60668e-14	1886	135	912	GO:0032940	GO:BP	27205	8354
MnPO	biosynthetic process	0.297985	0.0942953	1.61735e-13	1886	562	5960	GO:0009058	GO:BP	27205	3310
MnPO	neurotransmitter transport	0.0281018	0.252381	2.06031e-13	1886	53	210	GO:0006836	GO:BP	27205	2562
MnPO	cytoskeleton-dependent intracellular transport	0.0270414	0.258883	2.49523e-13	1886	51	197	GO:0030705	GO:BP	27205	7252
MnPO	growth	0.0774125	0.14052	3.64708e-13	1886	146	1039	GO:0040007	GO:BP	27205	10460
MnPO	regulation of vesicle-mediated transport	0.052492	0.167797	4.47091e-13	1886	99	590	GO:0060627	GO:BP	27205	15648
MnPO	amide biosynthetic process	0.068929	0.146232	8.07975e-13	1886	130	889	GO:0043604	GO:BP	27205	11391
MnPO	regulation of monoatomic ion transport	0.0535525	0.164495	8.62874e-13	1886	101	614	GO:0043269	GO:BP	27205	11181
MnPO	protein localization to plasma membrane	0.0339343	0.214047	9.19931e-13	1886	64	299	GO:0072659	GO:BP	27205	18455
MnPO	peptide biosynthetic process	0.0620361	0.152941	9.79203e-13	1886	117	765	GO:0043043	GO:BP	27205	11074
MnPO	signaling	0.359491	0.0898013	1.30784e-12	1886	678	7550	GO:0023052	GO:BP	27205	7002
MnPO	organic substance biosynthetic process	0.291622	0.0937766	1.30887e-12	1886	550	5865	GO:1901576	GO:BP	27205	22571
MnPO	axon guidance	0.0307529	0.226562	1.51443e-12	1886	58	256	GO:0007411	GO:BP	27205	2977
MnPO	translation	0.0604454	0.153846	1.54259e-12	1886	114	741	GO:0006412	GO:BP	27205	2221
MnPO	regulation of cellular localization	0.078473	0.137164	1.81733e-12	1886	148	1079	GO:0060341	GO:BP	27205	15386
MnPO	neuron projection guidance	0.0307529	0.225681	1.82611e-12	1886	58	257	GO:0097485	GO:BP	27205	19719
MnPO	dendrite morphogenesis	0.0249205	0.261111	2.76213e-12	1886	47	180	GO:0048813	GO:BP	27205	13799
MnPO	organelle localization	0.0509014	0.165803	2.83266e-12	1886	96	579	GO:0051640	GO:BP	27205	14641
MnPO	transport along microtubule	0.02386	0.269461	3.12025e-12	1886	45	167	GO:0010970	GO:BP	27205	4660
MnPO	learning or memory	0.0349947	0.203704	4.21759e-12	1886	66	324	GO:0007611	GO:BP	27205	3140
MnPO	regulation of protein metabolic process	0.148462	0.109503	5.93977e-12	1886	280	2557	GO:0051246	GO:BP	27205	14362
MnPO	protein localization to postsynaptic membrane	0.014316	0.421875	7.22648e-12	1886	27	64	GO:1903539	GO:BP	27205	24190
MnPO	regulation of monoatomic ion transmembrane transport	0.0440085	0.176221	7.47742e-12	1886	83	471	GO:0034765	GO:BP	27205	9201
MnPO	animal organ development	0.182397	0.103428	8.17307e-12	1886	344	3326	GO:0048513	GO:BP	27205	13536
MnPO	vesicle localization	0.0259809	0.245	1.05921e-11	1886	49	200	GO:0051648	GO:BP	27205	14649
MnPO	protein localization to postsynapse	0.014316	0.415385	1.15477e-11	1886	27	65	GO:0062237	GO:BP	27205	16804
MnPO	regulation of neurotransmitter levels	0.0275716	0.233184	1.37975e-11	1886	52	223	GO:0001505	GO:BP	27205	335
MnPO	positive regulation of signaling	0.1193	0.115622	1.8248e-11	1886	225	1946	GO:0023056	GO:BP	27205	7003
MnPO	positive regulation of cell communication	0.1193	0.115562	1.92891e-11	1886	225	1947	GO:0010647	GO:BP	27205	4389
MnPO	regulation of GTPase activity	0.0360551	0.193732	2.16254e-11	1886	68	351	GO:0043087	GO:BP	27205	11102
MnPO	secretion	0.0768823	0.133764	2.91759e-11	1886	145	1084	GO:0046903	GO:BP	27205	13155
MnPO	regulation of postsynaptic membrane potential	0.0227996	0.263804	3.03624e-11	1886	43	163	GO:0060078	GO:BP	27205	15168
MnPO	locomotory behavior	0.0291622	0.22	3.22651e-11	1886	55	250	GO:0007626	GO:BP	27205	3155
MnPO	cellular biosynthetic process	0.271474	0.0935331	3.87717e-11	1886	512	5474	GO:0044249	GO:BP	27205	11577
MnPO	cell adhesion	0.0954401	0.123035	4.78438e-11	1886	180	1463	GO:0007155	GO:BP	27205	2782
MnPO	monoatomic ion homeostasis	0.0519618	0.157051	4.87097e-11	1886	98	624	GO:0050801	GO:BP	27205	14013
MnPO	establishment of vesicle localization	0.02386	0.25	6.27556e-11	1886	45	180	GO:0051650	GO:BP	27205	14651
MnPO	actin filament-based process	0.0620361	0.144089	7.49165e-11	1886	117	812	GO:0030029	GO:BP	27205	7015
MnPO	regulation of presynaptic membrane potential	0.0106045	0.540541	7.54855e-11	1886	20	37	GO:0099505	GO:BP	27205	20163
MnPO	sodium ion transmembrane transport	0.0227996	0.257485	7.6907e-11	1886	43	167	GO:0035725	GO:BP	27205	9702
MnPO	monoatomic cation homeostasis	0.0509014	0.157119	8.80271e-11	1886	96	611	GO:0055080	GO:BP	27205	15064
MnPO	glutamate receptor signaling pathway	0.0127253	0.436364	1.0029e-10	1886	24	55	GO:0007215	GO:BP	27205	2836
MnPO	response to stimulus	0.471368	0.0838996	1.03672e-10	1886	889	10596	GO:0050896	GO:BP	27205	14092
MnPO	multicellular organismal process	0.415695	0.0856643	1.49378e-10	1886	784	9152	GO:0032501	GO:BP	27205	8031
MnPO	regulation of developmental process	0.151644	0.105848	1.95196e-10	1886	286	2702	GO:0050793	GO:BP	27205	14007
MnPO	cell death	0.131495	0.10988	2.15457e-10	1886	248	2257	GO:0008219	GO:BP	27205	3218
MnPO	cytoskeleton organization	0.0954401	0.120887	2.4123e-10	1886	180	1489	GO:0007010	GO:BP	27205	2681
MnPO	negative regulation of cellular component organization	0.0577943	0.145917	2.53581e-10	1886	109	747	GO:0051129	GO:BP	27205	14275
MnPO	homeostatic process	0.109226	0.115536	3.14322e-10	1886	206	1783	GO:0042592	GO:BP	27205	10828
MnPO	regulation of intracellular signal transduction	0.102863	0.117079	5.13386e-10	1886	194	1657	GO:1902531	GO:BP	27205	23381
MnPO	neurotransmitter secretion	0.0212089	0.258065	5.54914e-10	1886	40	155	GO:0007269	GO:BP	27205	2866
MnPO	signal release from synapse	0.0212089	0.258065	5.54914e-10	1886	40	155	GO:0099643	GO:BP	27205	20245
MnPO	regulation of transporter activity	0.0312831	0.196013	7.58437e-10	1886	59	301	GO:0032409	GO:BP	27205	7967
MnPO	microtubule-based transport	0.0249205	0.227053	7.89351e-10	1886	47	207	GO:0099111	GO:BP	27205	20106
MnPO	cell migration	0.0970308	0.118677	7.91352e-10	1886	183	1542	GO:0016477	GO:BP	27205	5356
MnPO	developmental growth involved in morphogenesis	0.0291622	0.204461	8.03202e-10	1886	55	269	GO:0060560	GO:BP	27205	15587
MnPO	cell growth	0.0455992	0.158965	1.00254e-09	1886	86	541	GO:0016049	GO:BP	27205	5204
MnPO	regulation of nervous system development	0.0461294	0.157895	1.07404e-09	1886	87	551	GO:0051960	GO:BP	27205	14818
MnPO	developmental cell growth	0.0291622	0.202952	1.10324e-09	1886	55	271	GO:0048588	GO:BP	27205	13599
MnPO	regulation of transmembrane transporter activity	0.0302227	0.197917	1.25416e-09	1886	57	288	GO:0022898	GO:BP	27205	6991
MnPO	chemical homeostasis	0.0742312	0.129032	1.39662e-09	1886	140	1085	GO:0048878	GO:BP	27205	13859
MnPO	sodium ion transport	0.0275716	0.208	1.75387e-09	1886	52	250	GO:0006814	GO:BP	27205	2550
MnPO	protein-containing complex localization	0.0259809	0.215859	1.88442e-09	1886	49	227	GO:0031503	GO:BP	27205	7588
MnPO	regulation of cell junction assembly	0.0265111	0.212766	1.96676e-09	1886	50	235	GO:1901888	GO:BP	27205	22843
MnPO	regulation of monoatomic ion transmembrane transporter activity	0.0291622	0.2	2.05831e-09	1886	55	275	GO:0032412	GO:BP	27205	7970
MnPO	synaptic transmission, glutamatergic	0.0174973	0.289474	2.14456e-09	1886	33	114	GO:0035249	GO:BP	27205	9406
MnPO	regulation of cellular metabolic process	0.267762	0.0916515	2.2605e-09	1886	505	5510	GO:0031323	GO:BP	27205	7510
MnPO	regulation of growth	0.0519618	0.146927	3.03745e-09	1886	98	667	GO:0040008	GO:BP	27205	10461
MnPO	regulation of nitrogen compound metabolic process	0.276776	0.0909091	3.09052e-09	1886	522	5742	GO:0051171	GO:BP	27205	14316
MnPO	developmental growth	0.0577943	0.140283	3.33282e-09	1886	109	777	GO:0048589	GO:BP	27205	13600
MnPO	receptor localization to synapse	0.0148462	0.329412	3.40187e-09	1886	28	85	GO:0097120	GO:BP	27205	19545
MnPO	regulation of locomotion	0.0731707	0.128015	3.72046e-09	1886	138	1078	GO:0040012	GO:BP	27205	10465
MnPO	intracellular monoatomic cation homeostasis	0.0440085	0.157795	3.86153e-09	1886	83	526	GO:0030003	GO:BP	27205	7010
MnPO	intracellular monoatomic ion homeostasis	0.0445387	0.156716	4.11715e-09	1886	84	536	GO:0006873	GO:BP	27205	2587
MnPO	regulation of protein localization	0.0673383	0.130928	6.41247e-09	1886	127	970	GO:0032880	GO:BP	27205	8304
MnPO	regulation of cell migration	0.0673383	0.130793	6.89012e-09	1886	127	971	GO:0030334	GO:BP	27205	7143
MnPO	actin cytoskeleton organization	0.0546129	0.141873	7.06594e-09	1886	103	726	GO:0030036	GO:BP	27205	7022
MnPO	regulation of protein localization to cell periphery	0.0196182	0.253425	7.88971e-09	1886	37	146	GO:1904375	GO:BP	27205	24916
MnPO	membrane organization	0.0636267	0.133038	9.10894e-09	1886	120	902	GO:0061024	GO:BP	27205	16012
MnPO	cellular component biogenesis	0.217391	0.0946008	9.8643e-09	1886	410	4334	GO:0044085	GO:BP	27205	11542
MnPO	regulation of catalytic activity	0.107635	0.111907	9.90506e-09	1886	203	1814	GO:0050790	GO:BP	27205	14005
MnPO	positive regulation of GTPase activity	0.0270414	0.200787	1.18669e-08	1886	51	254	GO:0043547	GO:BP	27205	11354
MnPO	cellular homeostasis	0.0609756	0.13466	1.1907e-08	1886	115	854	GO:0019725	GO:BP	27205	6348
MnPO	regulation of primary metabolic process	0.282609	0.0898365	1.22725e-08	1886	533	5933	GO:0080090	GO:BP	27205	18790
MnPO	intracellular chemical homeostasis	0.0556734	0.139073	1.48258e-08	1886	105	755	GO:0055082	GO:BP	27205	15066
MnPO	catabolic process	0.139449	0.103994	1.65115e-08	1886	263	2529	GO:0009056	GO:BP	27205	3308
MnPO	regulation of system process	0.0498409	0.144838	2.00591e-08	1886	94	649	GO:0044057	GO:BP	27205	11519
MnPO	small GTPase mediated signal transduction	0.0376458	0.164733	2.09778e-08	1886	71	431	GO:0007264	GO:BP	27205	2861
MnPO	regulation of organelle organization	0.0779427	0.122296	2.22729e-08	1886	147	1202	GO:0033043	GO:BP	27205	8427
MnPO	establishment of organelle localization	0.038176	0.163265	2.30763e-08	1886	72	441	GO:0051656	GO:BP	27205	14657
MnPO	regulation of synapse assembly	0.0185578	0.255474	2.35682e-08	1886	35	137	GO:0051963	GO:BP	27205	14821
MnPO	regulation of metabolic process	0.334571	0.0868907	2.42217e-08	1886	631	7262	GO:0019222	GO:BP	27205	5900
MnPO	inorganic ion homeostasis	0.0445387	0.151625	2.43084e-08	1886	84	554	GO:0098771	GO:BP	27205	19937
MnPO	adult behavior	0.0212089	0.231214	2.45472e-08	1886	40	173	GO:0030534	GO:BP	27205	7202
MnPO	potassium ion transmembrane transport	0.02386	0.212264	2.95221e-08	1886	45	212	GO:0071805	GO:BP	27205	17873
MnPO	regulation of axonogenesis	0.0212089	0.229885	2.97666e-08	1886	40	174	GO:0050770	GO:BP	27205	13990
MnPO	axo-dendritic transport	0.0137858	0.325	3.02883e-08	1886	26	80	GO:0008088	GO:BP	27205	3191
MnPO	response to endogenous stimulus	0.113468	0.10885	3.36897e-08	1886	214	1966	GO:0009719	GO:BP	27205	3694
MnPO	regulation of cell growth	0.0387063	0.160793	3.4769e-08	1886	73	454	GO:0001558	GO:BP	27205	362
MnPO	regulation of multicellular organismal process	0.169671	0.0985829	4.09553e-08	1886	320	3246	GO:0051239	GO:BP	27205	14358
MnPO	regulation of metal ion transport	0.0376458	0.1621	4.51699e-08	1886	71	438	GO:0010959	GO:BP	27205	4650
MnPO	cellular nitrogen compound biosynthetic process	0.236479	0.0920917	4.52451e-08	1886	446	4843	GO:0044271	GO:BP	27205	11584
MnPO	positive regulation of nervous system development	0.0328738	0.173184	5.18548e-08	1886	62	358	GO:0051962	GO:BP	27205	14820
MnPO	positive regulation of metabolic process	0.198834	0.0951535	5.31275e-08	1886	375	3941	GO:0009893	GO:BP	27205	3831
MnPO	neuron projection extension	0.0227996	0.215	5.40198e-08	1886	43	200	GO:1990138	GO:BP	27205	26321
MnPO	regulated exocytosis	0.0254507	0.2	5.78219e-08	1886	48	240	GO:0045055	GO:BP	27205	11943
MnPO	positive regulation of signal transduction	0.0949099	0.113651	5.95618e-08	1886	179	1575	GO:0009967	GO:BP	27205	3883
MnPO	cellular response to endogenous stimulus	0.0986214	0.112319	6.37973e-08	1886	186	1656	GO:0071495	GO:BP	27205	17675
MnPO	regulation of cell size	0.0233298	0.210526	6.64179e-08	1886	44	209	GO:0008361	GO:BP	27205	3254
MnPO	regulation of secretion by cell	0.0503712	0.141159	6.70028e-08	1886	95	673	GO:1903530	GO:BP	27205	24181
MnPO	regulation of cell motility	0.0683987	0.125243	9.1996e-08	1886	129	1030	GO:2000145	GO:BP	27205	26747
MnPO	purine nucleoside triphosphate metabolic process	0.0206787	0.225434	1.00937e-07	1886	39	173	GO:0009144	GO:BP	27205	3387
MnPO	positive regulation of cellular component biogenesis	0.0424178	0.150659	1.04725e-07	1886	80	531	GO:0044089	GO:BP	27205	11545
MnPO	positive regulation of neuron projection development	0.02386	0.204545	1.10106e-07	1886	45	220	GO:0010976	GO:BP	27205	4666
MnPO	regulation of dendrite development	0.0180276	0.248175	1.10149e-07	1886	34	137	GO:0050773	GO:BP	27205	13993
MnPO	cellular response to stimulus	0.396076	0.0838572	1.25012e-07	1886	747	8908	GO:0051716	GO:BP	27205	14697
MnPO	purine ribonucleoside triphosphate metabolic process	0.0201485	0.227545	1.33307e-07	1886	38	167	GO:0009205	GO:BP	27205	3447
MnPO	synaptic vesicle exocytosis	0.0153765	0.278846	1.40153e-07	1886	29	104	GO:0016079	GO:BP	27205	5230
MnPO	ribonucleoside triphosphate metabolic process	0.0206787	0.222857	1.46005e-07	1886	39	175	GO:0009199	GO:BP	27205	3441
MnPO	regulation of exocytosis	0.0233298	0.205607	1.50918e-07	1886	44	214	GO:0017157	GO:BP	27205	5421
MnPO	regulation of monoatomic cation transmembrane transport	0.0318134	0.17094	1.88016e-07	1886	60	351	GO:1904062	GO:BP	27205	24641
MnPO	organelle transport along microtubule	0.0137858	0.302326	1.89297e-07	1886	26	86	GO:0072384	GO:BP	27205	18352
MnPO	phosphorylation	0.106575	0.108531	1.96595e-07	1886	201	1852	GO:0016310	GO:BP	27205	5324
MnPO	cell motility	0.101273	0.10996	2.06173e-07	1886	191	1737	GO:0048870	GO:BP	27205	13853
MnPO	potassium ion transport	0.0249205	0.195021	2.3032e-07	1886	47	241	GO:0006813	GO:BP	27205	2549
MnPO	positive regulation of cellular metabolic process	0.159597	0.098366	2.4368e-07	1886	301	3060	GO:0031325	GO:BP	27205	7512
MnPO	regulation of neurogenesis	0.0376458	0.156044	2.66287e-07	1886	71	455	GO:0050767	GO:BP	27205	13987
MnPO	dendritic spine organization	0.0148462	0.28	2.68937e-07	1886	28	100	GO:0097061	GO:BP	27205	19503
MnPO	translation at synapse	0.0100742	0.395833	3.56896e-07	1886	19	48	GO:0140241	GO:BP	27205	20800
MnPO	translation at postsynapse	0.0100742	0.395833	3.56896e-07	1886	19	48	GO:0140242	GO:BP	27205	20801
MnPO	programmed cell death	0.116119	0.105441	3.63887e-07	1886	219	2077	GO:0012501	GO:BP	27205	4688
MnPO	learning	0.0212089	0.212766	3.73644e-07	1886	40	188	GO:0007612	GO:BP	27205	3141
MnPO	neuron projection organization	0.0153765	0.266055	4.84749e-07	1886	29	109	GO:0106027	GO:BP	27205	20283
MnPO	apoptotic process	0.112937	0.105446	6.69944e-07	1886	213	2020	GO:0006915	GO:BP	27205	2620
MnPO	vesicle-mediated transport to the plasma membrane	0.0180276	0.232877	7.00741e-07	1886	34	146	GO:0098876	GO:BP	27205	19985
MnPO	regulation of cellular component size	0.0339343	0.16	7.73429e-07	1886	64	400	GO:0032535	GO:BP	27205	8053
MnPO	metencephalon development	0.0169671	0.242424	7.7826e-07	1886	32	132	GO:0022037	GO:BP	27205	6951
MnPO	regulation of postsynapse organization	0.0169671	0.242424	7.7826e-07	1886	32	132	GO:0099175	GO:BP	27205	20145
MnPO	purine ribonucleotide metabolic process	0.0323436	0.163539	8.25738e-07	1886	61	373	GO:0009150	GO:BP	27205	3393
MnPO	nucleoside triphosphate metabolic process	0.0212089	0.206186	1.01128e-06	1886	40	194	GO:0009141	GO:BP	27205	3384
MnPO	regulation of anatomical structure size	0.042948	0.14311	1.01602e-06	1886	81	566	GO:0090066	GO:BP	27205	18997
MnPO	ribonucleotide metabolic process	0.033404	0.159898	1.09108e-06	1886	63	394	GO:0009259	GO:BP	27205	3500
MnPO	intracellular protein transport	0.0583245	0.127168	1.10533e-06	1886	110	865	GO:0006886	GO:BP	27205	2598
MnPO	adult locomotory behavior	0.014316	0.272727	1.10667e-06	1886	27	99	GO:0008344	GO:BP	27205	3243
MnPO	negative regulation of cell projection organization	0.0222694	0.199052	1.17378e-06	1886	42	211	GO:0031345	GO:BP	27205	7531
MnPO	regulation of postsynaptic membrane neurotransmitter receptor levels	0.0164369	0.244094	1.2207e-06	1886	31	127	GO:0099072	GO:BP	27205	20091
MnPO	regulation of extent of cell growth	0.0159067	0.25	1.24177e-06	1886	30	120	GO:0061387	GO:BP	27205	16357
MnPO	Golgi vesicle transport	0.0265111	0.179211	1.32341e-06	1886	50	279	GO:0048193	GO:BP	27205	13306
MnPO	forebrain development	0.0360551	0.153153	1.48823e-06	1886	68	444	GO:0030900	GO:BP	27205	7322
MnPO	calcium ion transmembrane transport	0.0307529	0.165242	1.49139e-06	1886	58	351	GO:0070588	GO:BP	27205	17128
MnPO	cerebellum development	0.0159067	0.247934	1.54256e-06	1886	30	121	GO:0021549	GO:BP	27205	6482
MnPO	regulation of protein localization to membrane	0.0217391	0.2	1.62068e-06	1886	41	205	GO:1905475	GO:BP	27205	25870
MnPO	ATP metabolic process	0.0174973	0.230769	1.64064e-06	1886	33	143	GO:0046034	GO:BP	27205	12513
MnPO	transmission of nerve impulse	0.0137858	0.276596	1.65692e-06	1886	26	94	GO:0019226	GO:BP	27205	5901
MnPO	endosomal transport	0.0233298	0.191304	1.71761e-06	1886	44	230	GO:0016197	GO:BP	27205	5293
MnPO	regulation of hydrolase activity	0.0636267	0.122574	1.72067e-06	1886	120	979	GO:0051336	GO:BP	27205	14432
MnPO	response to nitrogen compound	0.0816543	0.113402	1.91595e-06	1886	154	1358	GO:1901698	GO:BP	27205	22659
MnPO	regulation of secretion	0.0530223	0.130208	1.95796e-06	1886	100	768	GO:0051046	GO:BP	27205	14216
MnPO	positive regulation of molecular function	0.0885472	0.110816	1.98834e-06	1886	167	1507	GO:0044093	GO:BP	27205	11549
MnPO	translation at presynapse	0.00954401	0.382979	2.0667e-06	1886	18	47	GO:0140236	GO:BP	27205	20796
MnPO	regulation of cytoskeleton organization	0.0418876	0.142342	2.15355e-06	1886	79	555	GO:0051493	GO:BP	27205	14528
MnPO	regulation of anatomical structure morphogenesis	0.0609756	0.123789	2.20957e-06	1886	115	929	GO:0022603	GO:BP	27205	6973
MnPO	positive regulation of nitrogen compound metabolic process	0.162778	0.0959975	2.23706e-06	1886	307	3198	GO:0051173	GO:BP	27205	14318
MnPO	axonal transport	0.0111347	0.328125	2.31179e-06	1886	21	64	GO:0098930	GO:BP	27205	20020
MnPO	response to organonitrogen compound	0.0768823	0.114988	2.43441e-06	1886	145	1261	GO:0010243	GO:BP	27205	4100
MnPO	hindbrain development	0.0201485	0.206522	2.6177e-06	1886	38	184	GO:0030902	GO:BP	27205	7324
MnPO	ribose phosphate metabolic process	0.033404	0.156328	2.76306e-06	1886	63	403	GO:0019693	GO:BP	27205	6330
MnPO	dendritic spine development	0.0159067	0.241935	2.91011e-06	1886	30	124	GO:0060996	GO:BP	27205	15991
MnPO	calcium ion transport	0.0360551	0.150776	2.91407e-06	1886	68	451	GO:0006816	GO:BP	27205	2551
MnPO	cell surface receptor signaling pathway	0.149523	0.0974093	2.95726e-06	1886	282	2895	GO:0007166	GO:BP	27205	2793
MnPO	organic substance catabolic process	0.117179	0.102743	2.99569e-06	1886	221	2151	GO:1901575	GO:BP	27205	22570
MnPO	negative regulation of cell communication	0.083245	0.112063	3.02434e-06	1886	157	1401	GO:0010648	GO:BP	27205	4390
MnPO	signal release	0.042948	0.139655	3.27671e-06	1886	81	580	GO:0023061	GO:BP	27205	7007
MnPO	macromolecule biosynthetic process	0.229586	0.0897968	3.31284e-06	1886	433	4822	GO:0009059	GO:BP	27205	3311
MnPO	regulation of neurotransmitter secretion	0.0137858	0.268041	3.48779e-06	1886	26	97	GO:0046928	GO:BP	27205	13162
MnPO	memory	0.0185578	0.214724	3.98356e-06	1886	35	163	GO:0007613	GO:BP	27205	3142
MnPO	regulation of protein localization to synapse	0.00742312	0.482759	4.06216e-06	1886	14	29	GO:1902473	GO:BP	27205	23344
MnPO	negative regulation of signaling	0.0827147	0.111588	4.61522e-06	1886	156	1398	GO:0023057	GO:BP	27205	7004
MnPO	cell cycle	0.101803	0.105669	4.76886e-06	1886	192	1817	GO:0007049	GO:BP	27205	2708
MnPO	positive regulation of developmental process	0.0853659	0.110425	5.27131e-06	1886	161	1458	GO:0051094	GO:BP	27205	14249
MnPO	chemical synaptic transmission, postsynaptic	0.0169671	0.225352	5.57829e-06	1886	32	142	GO:0099565	GO:BP	27205	20205
MnPO	calcium ion homeostasis	0.0296925	0.162319	5.74672e-06	1886	56	345	GO:0055074	GO:BP	27205	15061
MnPO	excitatory postsynaptic potential	0.0164369	0.22963	6.08984e-06	1886	31	135	GO:0060079	GO:BP	27205	15169
MnPO	positive regulation of response to stimulus	0.126193	0.100084	6.93106e-06	1886	238	2378	GO:0048584	GO:BP	27205	13595
MnPO	neuron migration	0.0201485	0.198953	7.88619e-06	1886	38	191	GO:0001764	GO:BP	27205	444
MnPO	regulation of neurotransmitter transport	0.0148462	0.243478	8.8414e-06	1886	28	115	GO:0051588	GO:BP	27205	14593
MnPO	cellular component assembly	0.197243	0.0914679	8.85881e-06	1886	372	4067	GO:0022607	GO:BP	27205	6977
MnPO	macromolecule catabolic process	0.0821845	0.110714	8.97498e-06	1886	155	1400	GO:0009057	GO:BP	27205	3309
MnPO	regulation of small GTPase mediated signal transduction	0.0227996	0.183761	9.61518e-06	1886	43	234	GO:0051056	GO:BP	27205	14226
MnPO	synaptic vesicle recycling	0.0127253	0.272727	1.01621e-05	1886	24	88	GO:0036465	GO:BP	27205	10145
MnPO	carbohydrate derivative metabolic process	0.0652174	0.118042	1.03836e-05	1886	123	1042	GO:1901135	GO:BP	27205	22199
MnPO	mitotic cell cycle	0.0572641	0.122588	1.24542e-05	1886	108	881	GO:0000278	GO:BP	27205	80
MnPO	response to abiotic stimulus	0.078473	0.111362	1.40949e-05	1886	148	1329	GO:0009628	GO:BP	27205	3626
MnPO	ionotropic glutamate receptor signaling pathway	0.0068929	0.481481	1.63716e-05	1886	13	27	GO:0035235	GO:BP	27205	9401
MnPO	regulation of neuronal synaptic plasticity	0.0111347	0.295775	1.92152e-05	1886	21	71	GO:0048168	GO:BP	27205	13298
MnPO	neuromuscular process	0.019088	0.198895	2.04491e-05	1886	36	181	GO:0050905	GO:BP	27205	14100
MnPO	positive regulation of hydrolase activity	0.0397667	0.138122	2.16144e-05	1886	75	543	GO:0051345	GO:BP	27205	14441
MnPO	actin filament organization	0.0349947	0.145374	2.25523e-05	1886	66	454	GO:0007015	GO:BP	27205	2683
MnPO	microtubule-based process	0.0599152	0.119324	2.49176e-05	1886	113	947	GO:0007017	GO:BP	27205	2684
MnPO	dendritic spine morphogenesis	0.0111347	0.291667	2.53627e-05	1886	21	72	GO:0060997	GO:BP	27205	15992
MnPO	modulation of excitatory postsynaptic potential	0.0100742	0.316667	2.82696e-05	1886	19	60	GO:0098815	GO:BP	27205	19959
MnPO	regulation of synaptic plasticity	0.0302227	0.154054	2.90091e-05	1886	57	370	GO:0048167	GO:BP	27205	13297
MnPO	positive regulation of cell junction assembly	0.0148462	0.231405	2.9671e-05	1886	28	121	GO:1901890	GO:BP	27205	22845
MnPO	purine nucleotide metabolic process	0.0355249	0.143162	3.23965e-05	1886	67	468	GO:0006163	GO:BP	27205	2042
MnPO	regulation of axon extension	0.0137858	0.242991	3.31414e-05	1886	26	107	GO:0030516	GO:BP	27205	7196
MnPO	regulation of sodium ion transport	0.0127253	0.258065	3.35217e-05	1886	24	93	GO:0002028	GO:BP	27205	646
MnPO	positive regulation of catalytic activity	0.0662778	0.115101	3.45795e-05	1886	125	1086	GO:0043085	GO:BP	27205	11100
MnPO	regulation of amide metabolic process	0.0349947	0.143791	3.49056e-05	1886	66	459	GO:0034248	GO:BP	27205	8971
MnPO	organophosphate metabolic process	0.0604454	0.118257	3.52369e-05	1886	114	964	GO:0019637	GO:BP	27205	6280
MnPO	regulation of cytosolic calcium ion concentration	0.0116649	0.275	3.7802e-05	1886	22	80	GO:0051480	GO:BP	27205	14517
MnPO	positive regulation of protein localization	0.0376458	0.138943	4.20425e-05	1886	71	511	GO:1903829	GO:BP	27205	24440
MnPO	axon extension	0.0159067	0.217391	4.23668e-05	1886	30	138	GO:0048675	GO:BP	27205	13673
MnPO	cellular response to nitrogen compound	0.0551432	0.121212	4.34576e-05	1886	104	858	GO:1901699	GO:BP	27205	22660
MnPO	protein modification by small protein conjugation or removal	0.0620361	0.116766	4.61339e-05	1886	117	1002	GO:0070647	GO:BP	27205	17166
MnPO	regulation of developmental growth	0.0302227	0.152	4.71821e-05	1886	57	375	GO:0048638	GO:BP	27205	13636
MnPO	calcium-ion regulated exocytosis	0.0106045	0.294118	4.83954e-05	1886	20	68	GO:0017156	GO:BP	27205	5420
MnPO	vesicle cytoskeletal trafficking	0.0106045	0.294118	4.83954e-05	1886	20	68	GO:0099518	GO:BP	27205	20169
MnPO	ligand-gated ion channel signaling pathway	0.00795334	0.384615	4.96765e-05	1886	15	39	GO:1990806	GO:BP	27205	26543
MnPO	exocytic process	0.0127253	0.252632	5.26217e-05	1886	24	95	GO:0140029	GO:BP	27205	20726
MnPO	protein phosphorylation	0.0906681	0.105231	5.29176e-05	1886	171	1625	GO:0006468	GO:BP	27205	2258
MnPO	regulation of synaptic transmission, glutamatergic	0.0116649	0.268293	6.19899e-05	1886	22	82	GO:0051966	GO:BP	27205	14824
MnPO	chemotaxis	0.0434783	0.130366	6.2709e-05	1886	82	629	GO:0006935	GO:BP	27205	2631
MnPO	presynapse organization	0.0100742	0.301587	6.9333e-05	1886	19	63	GO:0099172	GO:BP	27205	20142
MnPO	taxis	0.0434783	0.129952	7.2231e-05	1886	82	631	GO:0042330	GO:BP	27205	10669
MnPO	neuron cellular homeostasis	0.0111347	0.276316	7.29102e-05	1886	21	76	GO:0070050	GO:BP	27205	16814
MnPO	neurotransmitter receptor localization to postsynaptic specialization membrane	0.00795334	0.375	7.43869e-05	1886	15	40	GO:0099645	GO:BP	27205	20247
MnPO	protein localization to postsynaptic specialization membrane	0.00795334	0.375	7.43869e-05	1886	15	40	GO:0099633	GO:BP	27205	20237
MnPO	telencephalon development	0.0259809	0.160656	7.90954e-05	1886	49	305	GO:0021537	GO:BP	27205	6470
MnPO	negative regulation of synaptic transmission	0.0106045	0.285714	8.34263e-05	1886	20	70	GO:0050805	GO:BP	27205	14017
MnPO	nucleoside phosphate metabolic process	0.038176	0.135593	9.16073e-05	1886	72	531	GO:0006753	GO:BP	27205	2505
MnPO	synaptic transmission, GABAergic	0.0100742	0.296875	9.22207e-05	1886	19	64	GO:0051932	GO:BP	27205	14791
MnPO	positive regulation of intracellular signal transduction	0.0615058	0.115423	0.000100104	1886	116	1005	GO:1902533	GO:BP	27205	23383
MnPO	negative regulation of neuron projection development	0.0169671	0.201258	0.000101123	1886	32	159	GO:0010977	GO:BP	27205	4667
MnPO	action potential	0.0164369	0.205298	0.000101295	1886	31	151	GO:0001508	GO:BP	27205	337
MnPO	intracellular calcium ion homeostasis	0.0265111	0.157233	0.000116473	1886	50	318	GO:0006874	GO:BP	27205	2588
MnPO	modification-dependent macromolecule catabolic process	0.0450689	0.126866	0.00012041	1886	85	670	GO:0043632	GO:BP	27205	11413
MnPO	neuromuscular process controlling balance	0.0100742	0.292308	0.000121874	1886	19	65	GO:0050885	GO:BP	27205	14082
MnPO	positive regulation of neurogenesis	0.0254507	0.16	0.000123993	1886	48	300	GO:0050769	GO:BP	27205	13989
MnPO	central nervous system projection neuron axonogenesis	0.0068929	0.419355	0.000129418	1886	13	31	GO:0021952	GO:BP	27205	6867
MnPO	cell surface receptor signaling pathway involved in cell-cell signaling	0.0402969	0.131261	0.000152414	1886	76	579	GO:1905114	GO:BP	27205	25551
MnPO	regulation of catabolic process	0.0588547	0.115987	0.00015304	1886	111	957	GO:0009894	GO:BP	27205	3832
MnPO	regulation of nervous system process	0.019088	0.184615	0.000153293	1886	36	195	GO:0031644	GO:BP	27205	7658
MnPO	regulation of protein localization to plasma membrane	0.0137858	0.226087	0.000161536	1886	26	115	GO:1903076	GO:BP	27205	23822
MnPO	Ras protein signal transduction	0.0275716	0.152047	0.000193468	1886	52	342	GO:0007265	GO:BP	27205	2862
MnPO	nucleotide metabolic process	0.0371156	0.134357	0.000202951	1886	70	521	GO:0009117	GO:BP	27205	3362
MnPO	regulation of cell development	0.0567338	0.116558	0.000207218	1886	107	918	GO:0060284	GO:BP	27205	15333
MnPO	protein catabolic process	0.0620361	0.113592	0.000207546	1886	117	1030	GO:0030163	GO:BP	27205	7054
MnPO	regulation of cell morphogenesis	0.0243902	0.160279	0.000221749	1886	46	287	GO:0022604	GO:BP	27205	6974
MnPO	regulation of cell differentiation	0.0943796	0.102064	0.000229141	1886	178	1744	GO:0045595	GO:BP	27205	12146
MnPO	regulation of protein modification process	0.0853659	0.10441	0.000234367	1886	161	1542	GO:0031399	GO:BP	27205	7552
MnPO	regulation of supramolecular fiber organization	0.0302227	0.145038	0.00024692	1886	57	393	GO:1902903	GO:BP	27205	23660
MnPO	presynapse assembly	0.00901379	0.309091	0.000247951	1886	17	55	GO:0099054	GO:BP	27205	20088
MnPO	modification-dependent protein catabolic process	0.0440085	0.125758	0.000253432	1886	83	660	GO:0019941	GO:BP	27205	6421
MnPO	positive regulation of macromolecule metabolic process	0.173913	0.0905077	0.000282369	1886	328	3624	GO:0010604	GO:BP	27205	4347
MnPO	signal transduction	0.30859	0.0831785	0.000286053	1886	582	6997	GO:0007165	GO:BP	27205	2792
MnPO	regulation of neurotransmitter receptor localization to postsynaptic specialization membrane	0.00530223	0.526316	0.000323739	1886	10	19	GO:0098696	GO:BP	27205	19881
MnPO	protein modification by small protein conjugation	0.0535525	0.117442	0.000333214	1886	101	860	GO:0032446	GO:BP	27205	7988
MnPO	anterograde axonal transport	0.00848356	0.32	0.000342251	1886	16	50	GO:0008089	GO:BP	27205	3192
MnPO	negative regulation of protein metabolic process	0.0636267	0.111732	0.000345343	1886	120	1074	GO:0051248	GO:BP	27205	14364
MnPO	protein dephosphorylation	0.0217391	0.166667	0.000371185	1886	41	246	GO:0006470	GO:BP	27205	2260
MnPO	negative regulation of locomotion	0.0275716	0.148997	0.000374604	1886	52	349	GO:0040013	GO:BP	27205	10466
MnPO	associative learning	0.0137858	0.216667	0.000399971	1886	26	120	GO:0008306	GO:BP	27205	3235
MnPO	cellular response to organonitrogen compound	0.0509014	0.118372	0.000473127	1886	96	811	GO:0071417	GO:BP	27205	17615
MnPO	regulation of macromolecule metabolic process	0.298515	0.0832225	0.000493115	1886	563	6765	GO:0060255	GO:BP	27205	15305
MnPO	response to oxygen-containing compound	0.112407	0.0972031	0.00053779	1886	212	2181	GO:1901700	GO:BP	27205	22661
MnPO	cellular response to chemical stimulus	0.154295	0.0917113	0.00053895	1886	291	3173	GO:0070887	GO:BP	27205	17294
MnPO	purine-containing compound metabolic process	0.0355249	0.132937	0.000569799	1886	67	504	GO:0072521	GO:BP	27205	18397
MnPO	negative regulation of nitrogen compound metabolic process	0.126193	0.0949721	0.000579996	1886	238	2506	GO:0051172	GO:BP	27205	14317
MnPO	regulation of dendritic spine morphogenesis	0.00901379	0.293103	0.000587803	1886	17	58	GO:0061001	GO:BP	27205	15996
MnPO	regulation of phosphorus metabolic process	0.0774125	0.105263	0.000594503	1886	146	1387	GO:0051174	GO:BP	27205	14319
MnPO	synaptic vesicle endocytosis	0.0106045	0.25641	0.000596906	1886	20	78	GO:0048488	GO:BP	27205	13519
MnPO	regulation of multicellular organismal development	0.0837752	0.103201	0.000644501	1886	158	1531	GO:2000026	GO:BP	27205	26633
MnPO	positive regulation of organelle organization	0.0371156	0.130354	0.000654632	1886	70	537	GO:0010638	GO:BP	27205	4380
MnPO	cerebellar cortex development	0.00954401	0.276923	0.000676715	1886	18	65	GO:0021695	GO:BP	27205	6627
MnPO	positive regulation of axonogenesis	0.0116649	0.236559	0.000704207	1886	22	93	GO:0050772	GO:BP	27205	13992
MnPO	regulation of translation	0.0296925	0.141058	0.000810338	1886	56	397	GO:0006417	GO:BP	27205	2225
MnPO	cell cycle process	0.0705196	0.107085	0.000815956	1886	133	1242	GO:0022402	GO:BP	27205	6955
MnPO	regulation of neuron migration	0.00848356	0.301887	0.000845627	1886	16	53	GO:2001222	GO:BP	27205	27702
MnPO	regulation of cell adhesion	0.0493107	0.117871	0.000888563	1886	93	789	GO:0030155	GO:BP	27205	7051
MnPO	ubiquitin-dependent protein catabolic process	0.0424178	0.123457	0.000922069	1886	80	648	GO:0006511	GO:BP	27205	2288
MnPO	regulation of phosphate metabolic process	0.0768823	0.104618	0.000938241	1886	145	1386	GO:0019220	GO:BP	27205	5898
MnPO	cellular response to stress	0.104454	0.0977667	0.00101391	1886	197	2015	GO:0033554	GO:BP	27205	8724
MnPO	proteolysis involved in protein catabolic process	0.0487805	0.117647	0.00111649	1886	92	782	GO:0051603	GO:BP	27205	14608
MnPO	presynaptic endocytosis	0.0106045	0.246914	0.00115752	1886	20	81	GO:0140238	GO:BP	27205	20798
MnPO	regulation of cellular response to stress	0.0445387	0.120863	0.00116183	1886	84	695	GO:0080135	GO:BP	27205	18809
MnPO	walking behavior	0.00742312	0.333333	0.00117414	1886	14	42	GO:0090659	GO:BP	27205	19424
MnPO	central nervous system neuron axonogenesis	0.00742312	0.333333	0.00117414	1886	14	42	GO:0021955	GO:BP	27205	6870
MnPO	regulation of actin filament-based process	0.0307529	0.137441	0.00121022	1886	58	422	GO:0032970	GO:BP	27205	8381
MnPO	response to organic cyclic compound	0.0662778	0.107852	0.00128098	1886	125	1159	GO:0014070	GO:BP	27205	4755
MnPO	vesicle organization	0.0265111	0.145349	0.0013828	1886	50	344	GO:0016050	GO:BP	27205	5205
MnPO	negative regulation of protein modification process	0.0349947	0.130435	0.00139507	1886	66	506	GO:0031400	GO:BP	27205	7553
MnPO	protein ubiquitination	0.0498409	0.116193	0.00146101	1886	94	809	GO:0016567	GO:BP	27205	5381
MnPO	post-Golgi vesicle-mediated transport	0.0116649	0.226804	0.0015344	1886	22	97	GO:0006892	GO:BP	27205	2603
MnPO	cellular component maintenance	0.0116649	0.226804	0.0015344	1886	22	97	GO:0043954	GO:BP	27205	11484
MnPO	cell-cell adhesion	0.0551432	0.112676	0.00160732	1886	104	923	GO:0098609	GO:BP	27205	19855
MnPO	supramolecular fiber organization	0.0493107	0.11625	0.00164081	1886	93	800	GO:0097435	GO:BP	27205	19703
MnPO	positive regulation of cell growth	0.0185578	0.170732	0.0016429	1886	35	205	GO:0030307	GO:BP	27205	7125
MnPO	regulation of potassium ion transmembrane transport	0.0111347	0.233333	0.00166541	1886	21	90	GO:1901379	GO:BP	27205	22401
MnPO	mitotic cell cycle process	0.0461294	0.118367	0.00177039	1886	87	735	GO:1903047	GO:BP	27205	23794
MnPO	response to salt	0.0302227	0.136691	0.001811	1886	57	417	GO:1902074	GO:BP	27205	23012
MnPO	positive regulation of synapse assembly	0.0100742	0.25	0.00181317	1886	19	76	GO:0051965	GO:BP	27205	14823
MnPO	regulation of receptor localization to synapse	0.00636267	0.375	0.00181756	1886	12	32	GO:1902683	GO:BP	27205	23485
MnPO	positive regulation of secretion by cell	0.0275716	0.141689	0.00183602	1886	52	367	GO:1903532	GO:BP	27205	24183
MnPO	organophosphate biosynthetic process	0.0376458	0.12611	0.00188963	1886	71	563	GO:0090407	GO:BP	27205	19299
MnPO	carbohydrate derivative biosynthetic process	0.0418876	0.121538	0.00203609	1886	79	650	GO:1901137	GO:BP	27205	22201
MnPO	ribonucleotide biosynthetic process	0.0196182	0.164444	0.0020649	1886	37	225	GO:0009260	GO:BP	27205	3501
MnPO	negative regulation of cell migration	0.02386	0.15	0.00208015	1886	45	300	GO:0030336	GO:BP	27205	7145
MnPO	dephosphorylation	0.0259809	0.144543	0.00210895	1886	49	339	GO:0016311	GO:BP	27205	5325
MnPO	cerebellar Purkinje cell layer development	0.0068929	0.342105	0.00214664	1886	13	38	GO:0021680	GO:BP	27205	6612
MnPO	peptidyl-amino acid modification	0.0683987	0.105911	0.00221712	1886	129	1218	GO:0018193	GO:BP	27205	5557
MnPO	clathrin-dependent endocytosis	0.00742312	0.318182	0.00223851	1886	14	44	GO:0072583	GO:BP	27205	18429
MnPO	proteasome-mediated ubiquitin-dependent protein catabolic process	0.0307529	0.134884	0.00225285	1886	58	430	GO:0043161	GO:BP	27205	11149
MnPO	synaptic vesicle localization	0.00848356	0.280702	0.00253026	1886	16	57	GO:0097479	GO:BP	27205	19716
MnPO	positive regulation of cell differentiation	0.0562036	0.110995	0.00255303	1886	106	955	GO:0045597	GO:BP	27205	12148
MnPO	protein localization to organelle	0.0572641	0.110429	0.00257202	1886	108	978	GO:0033365	GO:BP	27205	8610
MnPO	cytosolic transport	0.0159067	0.181818	0.00261911	1886	30	165	GO:0016482	GO:BP	27205	5359
MnPO	microtubule-based movement	0.0307529	0.134259	0.00262192	1886	58	432	GO:0007018	GO:BP	27205	2685
MnPO	import into cell	0.0212089	0.156863	0.00263794	1886	40	255	GO:0098657	GO:BP	27205	19863
MnPO	membrane docking	0.0106045	0.235294	0.00264882	1886	20	85	GO:0022406	GO:BP	27205	6959
MnPO	negative regulation of signal transduction	0.0699894	0.104928	0.00271766	1886	132	1258	GO:0009968	GO:BP	27205	3884
MnPO	regulation of cell death	0.0954401	0.0980392	0.00280405	1886	180	1836	GO:0010941	GO:BP	27205	4635
MnPO	adherens junction organization	0.00795334	0.294118	0.0028489	1886	15	51	GO:0034332	GO:BP	27205	9023
MnPO	protein localization to extracellular region	0.0302227	0.134752	0.00287768	1886	57	423	GO:0071692	GO:BP	27205	17810
MnPO	organonitrogen compound catabolic process	0.0742312	0.103397	0.00287918	1886	140	1354	GO:1901565	GO:BP	27205	22564
MnPO	purine ribonucleotide biosynthetic process	0.0185578	0.166667	0.00293818	1886	35	210	GO:0009152	GO:BP	27205	3395
MnPO	regulation of dendrite morphogenesis	0.0111347	0.225806	0.00296362	1886	21	93	GO:0048814	GO:BP	27205	13800
MnPO	energy derivation by oxidation of organic compounds	0.0265111	0.141643	0.00300523	1886	50	353	GO:0015980	GO:BP	27205	5183
MnPO	positive regulation of excitatory postsynaptic potential	0.0068929	0.333333	0.00301583	1886	13	39	GO:2000463	GO:BP	27205	27049
MnPO	neurotransmitter receptor transport	0.00583245	0.392857	0.00307377	1886	11	28	GO:0099637	GO:BP	27205	20239
MnPO	nucleobase-containing small molecule metabolic process	0.0387063	0.123311	0.00309197	1886	73	592	GO:0055086	GO:BP	27205	15068
MnPO	regulation of microtubule cytoskeleton organization	0.0153765	0.183544	0.00322144	1886	29	158	GO:0070507	GO:BP	27205	17092
MnPO	regulation of actin cytoskeleton organization	0.0275716	0.139037	0.00327332	1886	52	374	GO:0032956	GO:BP	27205	8368
MnPO	nucleoside triphosphate biosynthetic process	0.0137858	0.195489	0.0032769	1886	26	133	GO:0009142	GO:BP	27205	3385
MnPO	regulation of protein-containing complex assembly	0.0307529	0.133333	0.00328317	1886	58	435	GO:0043254	GO:BP	27205	11176
MnPO	purine nucleoside triphosphate biosynthetic process	0.0127253	0.205128	0.00337403	1886	24	117	GO:0009145	GO:BP	27205	3388
MnPO	negative regulation of cell motility	0.0243902	0.146032	0.00338563	1886	46	315	GO:2000146	GO:BP	27205	26748
MnPO	protein secretion	0.0296925	0.13494	0.00340619	1886	56	415	GO:0009306	GO:BP	27205	3528
MnPO	central nervous system neuron development	0.0111347	0.223404	0.00356888	1886	21	94	GO:0021954	GO:BP	27205	6869
MnPO	establishment of protein localization to extracellular region	0.0296925	0.134615	0.0036756	1886	56	416	GO:0035592	GO:BP	27205	9611
MnPO	cellular response to hormone stimulus	0.0418876	0.119697	0.00370249	1886	79	660	GO:0032870	GO:BP	27205	8294
MnPO	vesicle transport along microtubule	0.00742312	0.304348	0.00409539	1886	14	46	GO:0047496	GO:BP	27205	13190
MnPO	endocytosis	0.0503712	0.112961	0.00439248	1886	95	841	GO:0006897	GO:BP	27205	2607
MnPO	ribose phosphate biosynthetic process	0.0196182	0.159483	0.00440359	1886	37	232	GO:0046390	GO:BP	27205	12823
MnPO	gamma-aminobutyric acid signaling pathway	0.00583245	0.37931	0.00464172	1886	11	29	GO:0007214	GO:BP	27205	2835
MnPO	regulation of cation channel activity	0.014316	0.1875	0.00482387	1886	27	144	GO:2001257	GO:BP	27205	27733
MnPO	Rac protein signal transduction	0.00795334	0.283019	0.00489383	1886	15	53	GO:0016601	GO:BP	27205	5391
MnPO	neuronal action potential	0.00795334	0.283019	0.00489383	1886	15	53	GO:0019228	GO:BP	27205	5903
MnPO	cellular response to organic cyclic compound	0.0440085	0.117066	0.00493247	1886	83	709	GO:0071407	GO:BP	27205	17605
MnPO	positive regulation of nucleobase-containing compound metabolic process	0.105514	0.0952153	0.00534777	1886	199	2090	GO:0045935	GO:BP	27205	12431
MnPO	proton transmembrane transport	0.014316	0.186207	0.00554065	1886	27	145	GO:1902600	GO:BP	27205	23418
MnPO	cellular response to oxygen-containing compound	0.0837752	0.0994336	0.00592536	1886	158	1589	GO:1901701	GO:BP	27205	22662
MnPO	regulation of actin filament organization	0.0222694	0.14841	0.00629793	1886	42	283	GO:0110053	GO:BP	27205	20452
MnPO	multicellular organismal response to stress	0.0121951	0.20354	0.00639827	1886	23	113	GO:0033555	GO:BP	27205	8725
MnPO	positive regulation of monoatomic ion transport	0.0212089	0.151515	0.00642659	1886	40	264	GO:0043270	GO:BP	27205	11182
MnPO	multicellular organism growth	0.0174973	0.165829	0.00656682	1886	33	199	GO:0035264	GO:BP	27205	9411
MnPO	cell junction maintenance	0.00901379	0.25	0.00688249	1886	17	68	GO:0034331	GO:BP	27205	9022
MnPO	negative regulation of cellular metabolic process	0.113468	0.0935724	0.00715722	1886	214	2287	GO:0031324	GO:BP	27205	7511
MnPO	regulation of regulated secretory pathway	0.014316	0.183673	0.00727566	1886	27	147	GO:1903305	GO:BP	27205	23988
MnPO	ribonucleoside triphosphate biosynthetic process	0.0127253	0.196721	0.00735694	1886	24	122	GO:0009201	GO:BP	27205	3443
MnPO	calcium ion-regulated exocytosis of neurotransmitter	0.004772	0.45	0.00755326	1886	9	20	GO:0048791	GO:BP	27205	13777
MnPO	metabolic process	0.589608	0.0757751	0.00764259	1886	1112	14675	GO:0008152	GO:BP	27205	3197
MnPO	postsynaptic actin cytoskeleton organization	0.00530223	0.4	0.00778676	1886	10	25	GO:0098974	GO:BP	27205	20046
MnPO	organelle localization by membrane tethering	0.00954401	0.236842	0.00818145	1886	18	76	GO:0140056	GO:BP	27205	20738
MnPO	regulation of calcium ion transport	0.0222694	0.146853	0.00828138	1886	42	286	GO:0051924	GO:BP	27205	14786
MnPO	regulation of cell cycle	0.0604454	0.106145	0.0087075	1886	114	1074	GO:0051726	GO:BP	27205	14699
MnPO	purine ribonucleoside triphosphate biosynthetic process	0.0121951	0.198276	0.0102171	1886	23	116	GO:0009206	GO:BP	27205	3448
MnPO	response to nerve growth factor	0.00795334	0.267857	0.0104418	1886	15	56	GO:1990089	GO:BP	27205	26306
MnPO	cerebellar cortex morphogenesis	0.0068929	0.302326	0.0104537	1886	13	43	GO:0021696	GO:BP	27205	6628
MnPO	positive regulation of protein localization to cell periphery	0.00901379	0.242857	0.0105633	1886	17	70	GO:1904377	GO:BP	27205	24918
MnPO	regulation of intracellular transport	0.0249205	0.138235	0.0121467	1886	47	340	GO:0032386	GO:BP	27205	7960
MnPO	response to metal ion	0.0275716	0.132992	0.0122355	1886	52	391	GO:0010038	GO:BP	27205	3928
MnPO	import across plasma membrane	0.0174973	0.160976	0.0127112	1886	33	205	GO:0098739	GO:BP	27205	19917
MnPO	regulation of sodium ion transmembrane transport	0.00848356	0.25	0.0134338	1886	16	64	GO:1902305	GO:BP	27205	23215
MnPO	MAPK cascade	0.04772	0.111524	0.0137241	1886	90	807	GO:0000165	GO:BP	27205	59
MnPO	calcium ion transport into cytosol	0.00583245	0.34375	0.0142575	1886	11	32	GO:0060402	GO:BP	27205	15442
MnPO	regulation of long-term neuronal synaptic plasticity	0.00583245	0.34375	0.0142575	1886	11	32	GO:0048169	GO:BP	27205	13299
MnPO	calcium-dependent cell-cell adhesion via plasma membrane cell adhesion molecules	0.00583245	0.34375	0.0142575	1886	11	32	GO:0016339	GO:BP	27205	5340
MnPO	negative regulation of neurogenesis	0.0153765	0.170588	0.0146851	1886	29	170	GO:0050768	GO:BP	27205	13988
MnPO	adult walking behavior	0.00636267	0.315789	0.0147471	1886	12	38	GO:0007628	GO:BP	27205	3156
MnPO	lamellipodium assembly	0.00901379	0.236111	0.0159239	1886	17	72	GO:0030032	GO:BP	27205	7018
MnPO	vesicle docking	0.00795334	0.258621	0.0167547	1886	15	58	GO:0048278	GO:BP	27205	13358
MnPO	nucleoside phosphate biosynthetic process	0.0217391	0.14386	0.0180364	1886	41	285	GO:1901293	GO:BP	27205	22331
MnPO	clathrin coat assembly	0.00424178	0.470588	0.0181173	1886	8	17	GO:0048268	GO:BP	27205	13356
MnPO	maintenance of synapse structure	0.0068929	0.288889	0.0183091	1886	13	45	GO:0099558	GO:BP	27205	20198
MnPO	negative chemotaxis	0.0068929	0.288889	0.0183091	1886	13	45	GO:0050919	GO:BP	27205	14114
MnPO	transmembrane receptor protein tyrosine kinase signaling pathway	0.038176	0.11784	0.0184356	1886	72	611	GO:0007169	GO:BP	27205	2796
MnPO	regulation of G protein-coupled receptor signaling pathway	0.0132556	0.182482	0.0188212	1886	25	137	GO:0008277	GO:BP	27205	3222
MnPO	netrin-activated signaling pathway	0.00318134	0.666667	0.0192705	1886	6	9	GO:0038007	GO:BP	27205	10200
MnPO	regulation of biosynthetic process	0.19088	0.0853687	0.0195891	1886	360	4217	GO:0009889	GO:BP	27205	3827
MnPO	purine nucleotide biosynthetic process	0.0196182	0.149798	0.0195896	1886	37	247	GO:0006164	GO:BP	27205	2043
MnPO	proteasomal protein catabolic process	0.033404	0.122568	0.019673	1886	63	514	GO:0010498	GO:BP	27205	4267
MnPO	central nervous system neuron differentiation	0.0169671	0.16	0.0199746	1886	32	200	GO:0021953	GO:BP	27205	6868
MnPO	positive regulation of secretion	0.0291622	0.127907	0.0212836	1886	55	430	GO:0051047	GO:BP	27205	14217
MnPO	regulation of dendritic spine development	0.00954401	0.222222	0.0213908	1886	18	81	GO:0060998	GO:BP	27205	15993
MnPO	small molecule metabolic process	0.0943796	0.094984	0.0221285	1886	178	1874	GO:0044281	GO:BP	27205	11589
MnPO	negative regulation of response to stimulus	0.0853659	0.0967548	0.0223498	1886	161	1664	GO:0048585	GO:BP	27205	13596
MnPO	dense core granule transport	0.00371156	0.538462	0.0224979	1886	7	13	GO:1901950	GO:BP	27205	22902
MnPO	retrograde trans-synaptic signaling	0.00371156	0.538462	0.0224979	1886	7	13	GO:0098917	GO:BP	27205	20011
MnPO	dense core granule localization	0.00371156	0.538462	0.0224979	1886	7	13	GO:0032253	GO:BP	27205	7859
MnPO	dense core granule exocytosis	0.00371156	0.538462	0.0224979	1886	7	13	GO:1990504	GO:BP	27205	26428
MnPO	ATP biosynthetic process	0.0111347	0.2	0.0229305	1886	21	105	GO:0006754	GO:BP	27205	2506
MnPO	regulation of transferase activity	0.0487805	0.109394	0.0235223	1886	92	841	GO:0051338	GO:BP	27205	14434
MnPO	ribosome biogenesis	0.0227996	0.13961	0.0235297	1886	43	308	GO:0042254	GO:BP	27205	10632
MnPO	positive regulation of growth	0.0227996	0.13961	0.0235297	1886	43	308	GO:0045927	GO:BP	27205	12423
MnPO	neuron recognition	0.0068929	0.282609	0.0239084	1886	13	46	GO:0008038	GO:BP	27205	3172
MnPO	cell projection assembly	0.0365854	0.118353	0.0245252	1886	69	583	GO:0030031	GO:BP	27205	7017
MnPO	inorganic cation import across plasma membrane	0.0121951	0.188525	0.0246431	1886	23	122	GO:0098659	GO:BP	27205	19865
MnPO	inorganic ion import across plasma membrane	0.0121951	0.188525	0.0246431	1886	23	122	GO:0099587	GO:BP	27205	20214
MnPO	response to light stimulus	0.02386	0.136778	0.0252184	1886	45	329	GO:0009416	GO:BP	27205	3556
MnPO	positive regulation of biosynthetic process	0.104984	0.0930014	0.0255558	1886	198	2129	GO:0009891	GO:BP	27205	3829
MnPO	endocytic recycling	0.00954401	0.219512	0.025646	1886	18	82	GO:0032456	GO:BP	27205	7991
MnPO	postsynaptic cytoskeleton organization	0.00530223	0.357143	0.025788	1886	10	28	GO:0099188	GO:BP	27205	20154
MnPO	membrane depolarization during action potential	0.00530223	0.357143	0.025788	1886	10	28	GO:0086010	GO:BP	27205	18878
MnPO	regulation of sodium ion transmembrane transporter activity	0.00742312	0.264151	0.0259208	1886	14	53	GO:2000649	GO:BP	27205	27209
MnPO	regulation of phosphorylation	0.0662778	0.101543	0.0260529	1886	125	1231	GO:0042325	GO:BP	27205	10666
MnPO	negative regulation of nervous system development	0.0153765	0.165714	0.0262201	1886	29	175	GO:0051961	GO:BP	27205	14819
MnPO	positive regulation of dendrite morphogenesis	0.00795334	0.25	0.0262598	1886	15	60	GO:0050775	GO:BP	27205	13995
MnPO	lamellipodium organization	0.0100742	0.211111	0.0267724	1886	19	90	GO:0097581	GO:BP	27205	19752
MnPO	amide transport	0.028632	0.12766	0.0270641	1886	54	423	GO:0042886	GO:BP	27205	11011
MnPO	generation of precursor metabolites and energy	0.028632	0.12766	0.0270641	1886	54	423	GO:0006091	GO:BP	27205	1998
MnPO	plasma membrane bounded cell projection assembly	0.0360551	0.118467	0.0274837	1886	68	574	GO:0120031	GO:BP	27205	20544
MnPO	gliogenesis	0.0254507	0.132964	0.0280028	1886	48	361	GO:0042063	GO:BP	27205	10516
MnPO	positive regulation of cell development	0.033404	0.120921	0.0301938	1886	63	521	GO:0010720	GO:BP	27205	4445
MnPO	retrograde axonal transport	0.004772	0.391304	0.0303667	1886	9	23	GO:0008090	GO:BP	27205	3193
MnPO	regulation of calcium ion transmembrane transport	0.0164369	0.158974	0.0313549	1886	31	195	GO:1903169	GO:BP	27205	23875
MnPO	nucleotide biosynthetic process	0.0212089	0.141844	0.0325423	1886	40	282	GO:0009165	GO:BP	27205	3407
MnPO	regulation of mRNA processing	0.0137858	0.173333	0.0326035	1886	26	150	GO:0050684	GO:BP	27205	13959
MnPO	negative regulation of metabolic process	0.162248	0.086661	0.0344923	1886	306	3531	GO:0009892	GO:BP	27205	3830
MnPO	positive regulation of sodium ion transport	0.00636267	0.292683	0.0354047	1886	12	41	GO:0010765	GO:BP	27205	4486
MnPO	developmental maturation	0.0249205	0.132768	0.0357474	1886	47	354	GO:0021700	GO:BP	27205	6632
MnPO	response to hormone	0.0551432	0.105051	0.0360842	1886	104	990	GO:0009725	GO:BP	27205	3700
MnPO	cellular response to organic substance	0.11824	0.0906873	0.0368138	1886	223	2459	GO:0071310	GO:BP	27205	17511
MnPO	activation of GTPase activity	0.0106045	0.2	0.0371407	1886	20	100	GO:0090630	GO:BP	27205	19411
MnPO	second-messenger-mediated signaling	0.0233298	0.135802	0.0376995	1886	44	324	GO:0019932	GO:BP	27205	6416
MnPO	cellular respiration	0.0201485	0.143939	0.0378381	1886	38	264	GO:0045333	GO:BP	27205	12059
MnPO	regulation of synaptic vesicle recycling	0.00583245	0.314286	0.0379854	1886	11	35	GO:1903421	GO:BP	27205	24089
MnPO	regulation of establishment of protein localization	0.0371156	0.116279	0.0383365	1886	70	602	GO:0070201	GO:BP	27205	16909
MnPO	neuron death	0.0291622	0.125285	0.0388305	1886	55	439	GO:0070997	GO:BP	27205	17362
MnPO	cellular response to peptide	0.0270414	0.128463	0.0395419	1886	51	397	GO:1901653	GO:BP	27205	22627
MnPO	positive regulation of protein localization to plasma membrane	0.00795334	0.241935	0.0402732	1886	15	62	GO:1903078	GO:BP	27205	23824
MnPO	positive regulation of cation transmembrane transport	0.0148462	0.164706	0.0415105	1886	28	170	GO:1904064	GO:BP	27205	24643
MnPO	regulation of potassium ion transport	0.0111347	0.192661	0.0418774	1886	21	109	GO:0043266	GO:BP	27205	11178
MnPO	regulation of postsynaptic cytosolic calcium ion concentration	0.00371156	0.5	0.0422924	1886	7	14	GO:0099566	GO:BP	27205	20206
MnPO	endomembrane system organization	0.0339343	0.118959	0.0433008	1886	64	538	GO:0010256	GO:BP	27205	4111
MnPO	enzyme-linked receptor protein signaling pathway	0.0546129	0.104781	0.0440761	1886	103	983	GO:0007167	GO:BP	27205	2794
MnPO	cellular response to histamine	0.00318134	0.6	0.0453331	1886	6	10	GO:0071420	GO:BP	27205	17618
MnPO	trans-synaptic signaling by trans-synaptic complex	0.00318134	0.6	0.0453331	1886	6	10	GO:0099545	GO:BP	27205	20185
MnPO	synaptic vesicle priming	0.004772	0.375	0.0455974	1886	9	24	GO:0016082	GO:BP	27205	5233
MnPO	cerebellar Purkinje cell layer morphogenesis	0.004772	0.375	0.0455974	1886	9	24	GO:0021692	GO:BP	27205	6624
MnPO	synaptic vesicle transport	0.00636267	0.285714	0.0464521	1886	12	42	GO:0048489	GO:BP	27205	13520
MnPO	purine-containing compound biosynthetic process	0.0196182	0.143969	0.0484508	1886	37	257	GO:0072522	GO:BP	27205	18398
MnPO	positive regulation of cell morphogenesis involved in differentiation	0.00795334	0.238095	0.0494948	1886	15	63	GO:0010770	GO:BP	27205	4489
MnPO	response to inorganic substance	0.0402969	0.11276	0.0495425	1886	76	674	GO:0010035	GO:BP	27205	3925
MnPO	secretory granule localization	0.00424178	0.421053	0.0496765	1886	8	19	GO:0032252	GO:BP	27205	7858
MnPO	cytoplasm	0.692835	0.113167	6.60803e-128	1898	1315	11620	GO:0005737	GO:CC	27262	309
MnPO	synapse	0.206006	0.233154	2.86037e-107	1898	391	1677	GO:0045202	GO:CC	27262	2147
MnPO	cell junction	0.234984	0.19442	1.42562e-94	1898	446	2294	GO:0030054	GO:CC	27262	871
MnPO	neuron projection	0.186512	0.216779	1.76886e-86	1898	354	1633	GO:0043005	GO:CC	27262	1851
MnPO	cell projection	0.23393	0.16966	8.21858e-74	1898	444	2617	GO:0042995	GO:CC	27262	1850
MnPO	plasma membrane bounded cell projection	0.226027	0.170441	1.47157e-71	1898	429	2517	GO:0120025	GO:CC	27262	3453
MnPO	postsynapse	0.120126	0.263279	2.93438e-70	1898	228	866	GO:0098794	GO:CC	27262	3266
MnPO	presynapse	0.103267	0.263441	6.98531e-60	1898	196	744	GO:0098793	GO:CC	27262	3265
MnPO	somatodendritic compartment	0.128556	0.217857	4.97078e-58	1898	244	1120	GO:0036477	GO:CC	27262	1724
MnPO	intracellular anatomical structure	0.807165	0.0875179	4.28086e-57	1898	1532	17505	GO:0005622	GO:CC	27262	237
MnPO	axon	0.103793	0.247799	1.63046e-55	1898	197	795	GO:0030424	GO:CC	27262	935
MnPO	dendritic tree	0.10432	0.246575	1.94037e-55	1898	198	803	GO:0097447	GO:CC	27262	3014
MnPO	dendrite	0.103793	0.245943	6.00628e-55	1898	197	801	GO:0030425	GO:CC	27262	936
MnPO	glutamatergic synapse	0.0874605	0.272131	2.22101e-52	1898	166	610	GO:0098978	GO:CC	27262	3325
MnPO	synaptic membrane	0.0753425	0.294845	1.92874e-49	1898	143	485	GO:0097060	GO:CC	27262	2907
MnPO	endomembrane system	0.288198	0.127744	1.2597e-48	1898	547	4282	GO:0012505	GO:CC	27262	689
MnPO	membrane	0.538988	0.0992241	1.11193e-46	1898	1023	10310	GO:0016020	GO:CC	27262	722
MnPO	cellular anatomical entity	0.943625	0.0785664	2.0762e-46	1898	1791	22796	GO:0110165	GO:CC	27262	3449
MnPO	cell body	0.0964173	0.219952	2.96696e-43	1898	183	832	GO:0044297	GO:CC	27262	2056
MnPO	organelle	0.743941	0.0870584	1.29455e-42	1898	1412	16219	GO:0043226	GO:CC	27262	1883
MnPO	neuronal cell body	0.0885142	0.225201	6.47079e-41	1898	168	746	GO:0043025	GO:CC	27262	1853
MnPO	neuron to neuron synapse	0.0684932	0.268595	7.76059e-40	1898	130	484	GO:0098984	GO:CC	27262	3331
MnPO	organelle membrane	0.228135	0.131212	1.95114e-39	1898	433	3300	GO:0031090	GO:CC	27262	1048
MnPO	plasma membrane region	0.12803	0.171127	4.09731e-38	1898	243	1420	GO:0098590	GO:CC	27262	3226
MnPO	cytosol	0.263435	0.121153	6.57797e-37	1898	500	4127	GO:0005829	GO:CC	27262	380
MnPO	presynaptic membrane	0.0437302	0.368889	4.4902e-36	1898	83	225	GO:0042734	GO:CC	27262	1839
MnPO	intracellular organelle	0.720759	0.0860865	1.13145e-35	1898	1368	15891	GO:0043229	GO:CC	27262	1886
MnPO	asymmetric synapse	0.0616438	0.261745	1.77573e-34	1898	117	447	GO:0032279	GO:CC	27262	1285
MnPO	postsynaptic specialization	0.0621707	0.251064	6.87375e-33	1898	118	470	GO:0099572	GO:CC	27262	3384
MnPO	postsynaptic density	0.0574289	0.254079	9.48584e-31	1898	109	429	GO:0014069	GO:CC	27262	696
MnPO	bounding membrane of organelle	0.134352	0.149385	5.51579e-30	1898	255	1707	GO:0098588	GO:CC	27262	3225
MnPO	cytoplasmic vesicle	0.152792	0.139089	5.29877e-29	1898	290	2085	GO:0031410	GO:CC	27262	1109
MnPO	intracellular vesicle	0.152792	0.138889	6.81817e-29	1898	290	2088	GO:0097708	GO:CC	27262	3146
MnPO	postsynaptic membrane	0.0484721	0.277108	7.6649e-29	1898	92	332	GO:0045211	GO:CC	27262	2148
MnPO	vesicle	0.160169	0.135775	1.08786e-28	1898	304	2239	GO:0031982	GO:CC	27262	1231
MnPO	membrane-bounded organelle	0.674394	0.0853732	6.39075e-28	1898	1280	14993	GO:0043227	GO:CC	27262	1884
MnPO	distal axon	0.0521602	0.253846	9.49435e-28	1898	99	390	GO:0150034	GO:CC	27262	3593
MnPO	Golgi apparatus	0.1196	0.148269	7.07779e-26	1898	227	1531	GO:0005794	GO:CC	27262	358
MnPO	intracellular membrane-bounded organelle	0.652266	0.0852735	1.83061e-25	1898	1238	14518	GO:0043231	GO:CC	27262	1888
MnPO	GABA-ergic synapse	0.0263435	0.4	4.08346e-23	1898	50	125	GO:0098982	GO:CC	27262	3329
MnPO	transporter complex	0.0468915	0.213429	3.71358e-19	1898	89	417	GO:1990351	GO:CC	27262	3868
MnPO	neuron projection terminus	0.0305585	0.285714	2.02857e-18	1898	58	203	GO:0044306	GO:CC	27262	2065
MnPO	membrane protein complex	0.0922023	0.145108	2.17555e-18	1898	175	1206	GO:0098796	GO:CC	27262	3267
MnPO	cytoplasmic vesicle membrane	0.0742887	0.160045	2.72296e-18	1898	141	881	GO:0030659	GO:CC	27262	951
MnPO	transmembrane transporter complex	0.0442571	0.214286	4.01514e-18	1898	84	392	GO:1902495	GO:CC	27262	3621
MnPO	vesicle membrane	0.0748156	0.157254	1.01911e-17	1898	142	903	GO:0012506	GO:CC	27262	690
MnPO	neuron spine	0.0321391	0.264069	1.59324e-17	1898	61	231	GO:0044309	GO:CC	27262	2068
MnPO	site of polarized growth	0.0316122	0.264317	3.07105e-17	1898	60	227	GO:0030427	GO:CC	27262	938
MnPO	transport vesicle	0.044784	0.204819	4.94307e-17	1898	85	415	GO:0030133	GO:CC	27262	912
MnPO	endosome	0.0763962	0.152954	5.33456e-17	1898	145	948	GO:0005768	GO:CC	27262	336
MnPO	dendritic spine	0.0310854	0.262222	9.4875e-17	1898	59	225	GO:0043197	GO:CC	27262	1872
MnPO	growth cone	0.0305585	0.263636	1.44523e-16	1898	58	220	GO:0030426	GO:CC	27262	937
MnPO	cytosolic ribosome	0.0216017	0.356522	1.47715e-16	1898	41	115	GO:0022626	GO:CC	27262	860
MnPO	plasma membrane	0.327713	0.094716	1.59151e-16	1898	622	6567	GO:0005886	GO:CC	27262	424
MnPO	cytoskeleton	0.14647	0.117647	1.66783e-16	1898	278	2363	GO:0005856	GO:CC	27262	401
MnPO	exocytic vesicle	0.0342466	0.234657	7.51276e-16	1898	65	277	GO:0070382	GO:CC	27262	2478
MnPO	synaptic vesicle	0.032666	0.24031	1.31427e-15	1898	62	258	GO:0008021	GO:CC	27262	488
MnPO	presynaptic active zone	0.0205479	0.354545	1.35216e-15	1898	39	110	GO:0048786	GO:CC	27262	2249
MnPO	axon terminus	0.0268704	0.275676	2.5402e-15	1898	51	185	GO:0043679	GO:CC	27262	1964
MnPO	cell periphery	0.343519	0.0925085	3.62777e-15	1898	652	7048	GO:0071944	GO:CC	27262	2801
MnPO	endoplasmic reticulum	0.121707	0.121964	4.10649e-15	1898	231	1894	GO:0005783	GO:CC	27262	348
MnPO	perinuclear region of cytoplasm	0.0648051	0.153558	2.58598e-14	1898	123	801	GO:0048471	GO:CC	27262	2238
MnPO	monoatomic ion channel complex	0.0342466	0.215232	7.67638e-14	1898	65	302	GO:0034702	GO:CC	27262	1540
MnPO	Golgi membrane	0.0489989	0.17033	2.86901e-13	1898	93	546	GO:0000139	GO:CC	27262	18
MnPO	postsynaptic specialization membrane	0.0226554	0.277419	7.60801e-13	1898	43	155	GO:0099634	GO:CC	27262	3390
MnPO	cell leading edge	0.0426765	0.178414	1.54473e-12	1898	81	454	GO:0031252	GO:CC	27262	1077
MnPO	neuron projection cytoplasm	0.0179136	0.326923	3.10591e-12	1898	34	104	GO:0120111	GO:CC	27262	3471
MnPO	microtubule cytoskeleton	0.0900948	0.124909	1.34371e-11	1898	171	1369	GO:0015630	GO:CC	27262	710
MnPO	transport vesicle membrane	0.0263435	0.228311	2.00942e-11	1898	50	219	GO:0030658	GO:CC	27262	950
MnPO	perikaryon	0.0258166	0.231132	2.1717e-11	1898	49	212	GO:0043204	GO:CC	27262	1876
MnPO	excitatory synapse	0.0158061	0.340909	3.30842e-11	1898	30	88	GO:0060076	GO:CC	27262	2271
MnPO	organelle subcompartment	0.089568	0.123099	5.79688e-11	1898	170	1381	GO:0031984	GO:CC	27262	1233
MnPO	postsynaptic density membrane	0.0179136	0.295652	8.56627e-11	1898	34	115	GO:0098839	GO:CC	27262	3287
MnPO	exocytic vesicle membrane	0.0205479	0.26	1.49766e-10	1898	39	150	GO:0099501	GO:CC	27262	3372
MnPO	synaptic vesicle membrane	0.0205479	0.26	1.49766e-10	1898	39	150	GO:0030672	GO:CC	27262	963
MnPO	presynaptic active zone membrane	0.012118	0.418182	1.72969e-10	1898	23	55	GO:0048787	GO:CC	27262	2250
MnPO	protein-containing complex	0.340358	0.0882273	1.97633e-10	1898	646	7322	GO:0032991	GO:CC	27262	1343
MnPO	polysomal ribosome	0.00948367	0.529412	3.94142e-10	1898	18	34	GO:0042788	GO:CC	27262	1845
MnPO	cytosolic small ribosomal subunit	0.0110643	0.4375	6.16225e-10	1898	21	48	GO:0022627	GO:CC	27262	861
MnPO	ribosomal subunit	0.024236	0.220096	8.14081e-10	1898	46	209	GO:0044391	GO:CC	27262	2082
MnPO	catalytic complex	0.106428	0.113039	1.01791e-09	1898	202	1787	GO:1902494	GO:CC	27262	3620
MnPO	cation channel complex	0.0231823	0.22449	1.19738e-09	1898	44	196	GO:0034703	GO:CC	27262	1541
MnPO	nucleoplasm	0.194942	0.0971129	1.40589e-09	1898	370	3810	GO:0005654	GO:CC	27262	252
MnPO	Schaffer collateral - CA1 synapse	0.0184405	0.261194	2.05551e-09	1898	35	134	GO:0098685	GO:CC	27262	3252
MnPO	secretory vesicle	0.0532139	0.142053	2.11599e-09	1898	101	711	GO:0099503	GO:CC	27262	3373
MnPO	polysome	0.0126449	0.338028	1.21386e-08	1898	24	71	GO:0005844	GO:CC	27262	390
MnPO	extrinsic component of membrane	0.0300316	0.178683	1.70596e-08	1898	57	319	GO:0019898	GO:CC	27262	829
MnPO	plasma membrane protein complex	0.044784	0.146552	2.10626e-08	1898	85	580	GO:0098797	GO:CC	27262	3268
MnPO	cytoplasmic region	0.0289779	0.180921	2.27856e-08	1898	55	304	GO:0099568	GO:CC	27262	3381
MnPO	axon cytoplasm	0.0115911	0.34375	5.505e-08	1898	22	64	GO:1904115	GO:CC	27262	3685
MnPO	early endosome	0.0347734	0.159806	7.93757e-08	1898	66	413	GO:0005769	GO:CC	27262	337
MnPO	small ribosomal subunit	0.0131718	0.290698	1.861e-07	1898	25	86	GO:0015935	GO:CC	27262	712
MnPO	organelle envelope	0.0785037	0.115325	2.37832e-07	1898	149	1292	GO:0031967	GO:CC	27262	1218
MnPO	envelope	0.0785037	0.115325	2.37832e-07	1898	149	1292	GO:0031975	GO:CC	27262	1225
MnPO	dendritic shaft	0.0115911	0.314286	3.9165e-07	1898	22	70	GO:0043198	GO:CC	27262	1873
MnPO	mitochondrion	0.108008	0.105074	4.48657e-07	1898	205	1951	GO:0005739	GO:CC	27262	310
MnPO	myelin sheath	0.0216017	0.195238	6.01425e-07	1898	41	210	GO:0043209	GO:CC	27262	1877
MnPO	terminal bouton	0.0126449	0.285714	6.07601e-07	1898	24	84	GO:0043195	GO:CC	27262	1870
MnPO	adherens junction	0.0179136	0.21118	1.82752e-06	1898	34	161	GO:0005912	GO:CC	27262	442
MnPO	parallel fiber to Purkinje cell synapse	0.00737619	0.451613	1.97759e-06	1898	14	31	GO:0098688	GO:CC	27262	3255
MnPO	recycling endosome	0.0194942	0.198925	2.18843e-06	1898	37	186	GO:0055037	GO:CC	27262	2261
MnPO	leading edge membrane	0.0194942	0.197861	2.5475e-06	1898	37	187	GO:0031256	GO:CC	27262	1081
MnPO	cell-cell junction	0.0389884	0.138577	4.33181e-06	1898	74	534	GO:0005911	GO:CC	27262	441
MnPO	microtubule	0.0353003	0.143469	5.40005e-06	1898	67	467	GO:0005874	GO:CC	27262	414
MnPO	extrinsic component of plasma membrane	0.0184405	0.195531	8.86006e-06	1898	35	179	GO:0019897	GO:CC	27262	828
MnPO	neuron projection membrane	0.0110643	0.28	9.34596e-06	1898	21	75	GO:0032589	GO:CC	27262	1322
MnPO	Golgi apparatus subcompartment	0.0289779	0.153203	1.12377e-05	1898	55	359	GO:0098791	GO:CC	27262	3264
MnPO	plasma membrane bounded cell projection cytoplasm	0.0237092	0.168539	1.15755e-05	1898	45	267	GO:0032838	GO:CC	27262	1334
MnPO	mitochondrial membrane	0.0505796	0.123393	1.23092e-05	1898	96	778	GO:0031966	GO:CC	27262	1217
MnPO	glial cell projection	0.00790306	0.365854	1.78703e-05	1898	15	41	GO:0097386	GO:CC	27262	2987
MnPO	ionotropic glutamate receptor complex	0.00790306	0.365854	1.78703e-05	1898	15	41	GO:0008328	GO:CC	27262	509
MnPO	cytosolic large ribosomal subunit	0.0100105	0.292308	2.00603e-05	1898	19	65	GO:0022625	GO:CC	27262	859
MnPO	astrocyte projection	0.00579557	0.5	2.39509e-05	1898	11	22	GO:0097449	GO:CC	27262	3016
MnPO	neurotransmitter receptor complex	0.00790306	0.348837	3.73739e-05	1898	15	43	GO:0098878	GO:CC	27262	3306
MnPO	sarcolemma	0.0173867	0.190751	4.0861e-05	1898	33	173	GO:0042383	GO:CC	27262	1785
MnPO	cytoplasmic side of membrane	0.0194942	0.177885	4.67959e-05	1898	37	208	GO:0098562	GO:CC	27262	3207
MnPO	hippocampal mossy fiber to CA3 synapse	0.0089568	0.303571	5.4476e-05	1898	17	56	GO:0098686	GO:CC	27262	3253
MnPO	anchoring junction	0.0468915	0.122421	5.57645e-05	1898	89	727	GO:0070161	GO:CC	27262	2447
MnPO	mitochondrial envelope	0.0521602	0.11828	5.94748e-05	1898	99	837	GO:0005740	GO:CC	27262	311
MnPO	dendrite membrane	0.00842993	0.313725	7.60882e-05	1898	16	51	GO:0032590	GO:CC	27262	1323
MnPO	endoplasmic reticulum subcompartment	0.0632244	0.111111	8.9423e-05	1898	120	1080	GO:0098827	GO:CC	27262	3278
MnPO	coated vesicle	0.0210748	0.166667	9.00458e-05	1898	40	240	GO:0030135	GO:CC	27262	914
MnPO	potassium channel complex	0.0115911	0.23913	9.51796e-05	1898	22	92	GO:0034705	GO:CC	27262	1543
MnPO	dendrite cytoplasm	0.00737619	0.35	9.53146e-05	1898	14	40	GO:0032839	GO:CC	27262	1335
MnPO	endoplasmic reticulum membrane	0.0626976	0.110801	0.000116268	1898	119	1074	GO:0005789	GO:CC	27262	354
MnPO	main axon	0.0105374	0.253165	0.000123083	1898	20	79	GO:0044304	GO:CC	27262	2063
MnPO	endosome membrane	0.0321391	0.136771	0.000130407	1898	61	446	GO:0010008	GO:CC	27262	667
MnPO	neuromuscular junction	0.012118	0.227723	0.00013178	1898	23	101	GO:0031594	GO:CC	27262	1172
MnPO	cell projection membrane	0.0279241	0.144414	0.000138269	1898	53	367	GO:0031253	GO:CC	27262	1078
MnPO	lamellipodium	0.0189673	0.170616	0.000198183	1898	36	211	GO:0030027	GO:CC	27262	870
MnPO	sodium channel complex	0.00579557	0.423077	0.000202113	1898	11	26	GO:0034706	GO:CC	27262	1544
MnPO	membrane raft	0.0295047	0.139303	0.00021537	1898	56	402	GO:0045121	GO:CC	27262	2137
MnPO	trans-Golgi network	0.0210748	0.16129	0.000217372	1898	40	248	GO:0005802	GO:CC	27262	364
MnPO	membrane microdomain	0.0295047	0.138958	0.000233498	1898	56	403	GO:0098857	GO:CC	27262	3298
MnPO	nuclear outer membrane-endoplasmic reticulum membrane network	0.0632244	0.108696	0.000279124	1898	120	1104	GO:0042175	GO:CC	27262	1782
MnPO	inner mitochondrial membrane protein complex	0.0147524	0.186667	0.000575497	1898	28	150	GO:0098800	GO:CC	27262	3271
MnPO	cytoplasmic side of plasma membrane	0.016333	0.176136	0.000595377	1898	31	176	GO:0009898	GO:CC	27262	657
MnPO	presynaptic active zone cytoplasmic component	0.00474183	0.473684	0.000705795	1898	9	19	GO:0098831	GO:CC	27262	3280
MnPO	supramolecular complex	0.0753425	0.102143	0.000840508	1898	143	1400	GO:0099080	GO:CC	27262	3350
MnPO	mitochondrial protein-containing complex	0.0231823	0.145695	0.00104036	1898	44	302	GO:0098798	GO:CC	27262	3269
MnPO	cell cortex	0.0252898	0.139942	0.00118566	1898	48	343	GO:0005938	GO:CC	27262	462
MnPO	basal plasma membrane	0.0231823	0.144737	0.00124081	1898	44	304	GO:0009925	GO:CC	27262	660
MnPO	ribbon synapse	0.0052687	0.4	0.00124483	1898	10	25	GO:0097470	GO:CC	27262	3030
MnPO	Golgi-associated vesicle	0.0105374	0.21978	0.00135453	1898	20	91	GO:0005798	GO:CC	27262	362
MnPO	calyx of Held	0.00579557	0.354839	0.00160015	1898	11	31	GO:0044305	GO:CC	27262	2064
MnPO	clathrin-coated vesicle	0.0142255	0.18	0.0018018	1898	27	150	GO:0030136	GO:CC	27262	915
MnPO	ribosome	0.0289779	0.130952	0.00184206	1898	55	420	GO:0005840	GO:CC	27262	389
MnPO	axon initial segment	0.0052687	0.384615	0.00189652	1898	10	26	GO:0043194	GO:CC	27262	1869
MnPO	filopodium	0.012118	0.196581	0.00196281	1898	23	117	GO:0030175	GO:CC	27262	922
[truncated: 3,915 more rows]

## Sheet: DEGs_Ziesel2018
gene	description	p_val	avg_log2FC	pct.1	pct.2	p_val_adj	class
Gria1	glutamate receptor, ionotropic, AMPA1 (alpha 1) [Source:MGI Symbol;Acc:MGI:95808]	4.72134e-07	0.557157	0.739	0.489	0.0110881	ARC
Gria1	glutamate receptor, ionotropic, AMPA1 (alpha 1) [Source:MGI Symbol;Acc:MGI:95808]	0.000175692	0.265061	0.562	0.482	1	LHA
Six3os1	SIX homeobox 3, opposite strand 1 [Source:MGI Symbol;Acc:MGI:1925118]	6.64896e-07	0.710493	0.174	0.047	0.0156151	ARC
Ext2	exostosin glycosyltransferase 2 [Source:MGI Symbol;Acc:MGI:108050]	2.78254e-06	0.732652	0.191	0.059	0.0653479	ARC
Actg1	actin, gamma, cytoplasmic 1 [Source:MGI Symbol;Acc:MGI:87906]	2.66467e-05	1.13067	0.522	0.332	0.625797	ARC
Nrxn3	neurexin III [Source:MGI Symbol;Acc:MGI:1096389]	0.000173332	0.680233	0.565	0.38	1	ARC
Nrxn3	neurexin III [Source:MGI Symbol;Acc:MGI:1096389]	6.77208e-31	0.262252	0.33	0.396	1.59042e-26	MnPO
Ttc28	tetratricopeptide repeat domain 28 [Source:MGI Symbol;Acc:MGI:2140873]	0.000206794	0.274759	0.217	0.119	1	ARC
Elavl1	ELAV (embryonic lethal, abnormal vision)-like 1 (Hu antigen R) [Source:MGI Symbol;Acc:MGI:1100851]	0.000230527	0.355997	0.174	0.079	1	ARC
Msi2	musashi RNA-binding protein 2 [Source:MGI Symbol;Acc:MGI:1923876]	0.000247754	0.430832	0.713	0.528	1	ARC
Rap1gds1	RAP1, GTP-GDP dissociation stimulator 1 [Source:MGI Symbol;Acc:MGI:2385189]	0.000312985	0.769653	0.174	0.064	1	ARC
Scap	SREBF chaperone [Source:MGI Symbol;Acc:MGI:2135958]	0.000370369	0.486729	0.157	0.06	1	ARC
Kmt2a	lysine (K)-specific methyltransferase 2A [Source:MGI Symbol;Acc:MGI:96995]	0.000373867	0.30798	0.165	0.077	1	ARC
Six3	sine oculis-related homeobox 3 [Source:MGI Symbol;Acc:MGI:102764]	0.000775922	0.508156	0.165	0.068	1	ARC
Six3	sine oculis-related homeobox 3 [Source:MGI Symbol;Acc:MGI:102764]	1.42711e-09	0.583739	0.15	0.062	3.35158e-05	SCN
Thra	thyroid hormone receptor alpha [Source:MGI Symbol;Acc:MGI:98742]	0.000777523	0.284701	0.235	0.132	1	ARC
Thra	thyroid hormone receptor alpha [Source:MGI Symbol;Acc:MGI:98742]	0.00697886	0.255787	0.194	0.131	1	PVN
Firre	functional intergenic repeating RNA element [Source:MGI Symbol;Acc:MGI:2147989]	0.0008399	0.467055	0.165	0.071	1	ARC
Pid1	phosphotyrosine interaction domain containing 1 [Source:MGI Symbol;Acc:MGI:2138391]	0.00085391	0.316642	0.304	0.179	1	ARC
Epdr1	ependymin related protein 1 (zebrafish) [Source:MGI Symbol;Acc:MGI:2145369]	0.00102112	0.326933	0.226	0.126	1	ARC
Scmh1	sex comb on midleg homolog 1 [Source:MGI Symbol;Acc:MGI:1352762]	0.00103127	0.423635	0.209	0.107	1	ARC
Pip4p1	phosphatidylinositol-4,5-bisphosphate 4-phosphatase 1 [Source:MGI Symbol;Acc:MGI:2448501]	0.00163816	0.683249	0.165	0.066	1	ARC
Itfg1	integrin alpha FG-GAP repeat containing 1 [Source:MGI Symbol;Acc:MGI:106419]	0.00185162	0.466375	0.217	0.109	1	ARC
Rnf216	ring finger protein 216 [Source:MGI Symbol;Acc:MGI:1344349]	0.00245387	0.549221	0.174	0.076	1	ARC
Aplp2	amyloid beta (A4) precursor-like protein 2 [Source:MGI Symbol;Acc:MGI:88047]	0.00258723	0.339393	0.296	0.179	1	ARC
Sox1	SRY (sex determining region Y)-box 1 [Source:MGI Symbol;Acc:MGI:98357]	0.00271864	0.705151	0.226	0.111	1	ARC
Sgip1	SH3-domain GRB2-like (endophilin) interacting protein 1 [Source:MGI Symbol;Acc:MGI:1920344]	0.00276039	0.593266	0.183	0.081	1	ARC
Sgip1	SH3-domain GRB2-like (endophilin) interacting protein 1 [Source:MGI Symbol;Acc:MGI:1920344]	4.64379e-08	0.569389	0.18	0.076	0.0010906	VPH
Sh3pxd2b	SH3 and PX domains 2B [Source:MGI Symbol;Acc:MGI:2442062]	0.00281979	0.287043	0.296	0.192	1	ARC
Heyl	hairy/enhancer-of-split related with YRPW motif-like [Source:MGI Symbol;Acc:MGI:1860511]	0.0038991	0.2994	0.157	0.082	1	ARC
Omg	oligodendrocyte myelin glycoprotein [Source:MGI Symbol;Acc:MGI:106586]	0.00446517	0.35859	0.2	0.108	1	ARC
Cox7a2l	cytochrome c oxidase subunit 7A2 like [Source:MGI Symbol;Acc:MGI:106015]	0.00490004	0.310298	0.252	0.153	1	ARC
Csmd2	CUB and Sushi multiple domains 2 [Source:MGI Symbol;Acc:MGI:2386401]	0.00533732	0.329395	0.217	0.121	1	ARC
App	amyloid beta (A4) precursor protein [Source:MGI Symbol;Acc:MGI:88059]	0.00542392	0.785042	0.183	0.086	1	ARC
Tef	thyrotroph embryonic factor [Source:MGI Symbol;Acc:MGI:98663]	0.00586872	0.578179	0.278	0.158	1	ARC
Sdha	succinate dehydrogenase complex, subunit A, flavoprotein (Fp) [Source:MGI Symbol;Acc:MGI:1914195]	0.00637123	0.633885	0.226	0.119	1	ARC
Pabpn1	poly(A) binding protein, nuclear 1 [Source:MGI Symbol;Acc:MGI:1859158]	0.00728318	0.383325	0.304	0.188	1	ARC
Pabpn1	poly(A) binding protein, nuclear 1 [Source:MGI Symbol;Acc:MGI:1859158]	0.000370181	0.356795	0.277	0.185	1	VPH
Nfkb1	nuclear factor of kappa light polypeptide gene enhancer in B cells 1, p105 [Source:MGI Symbol;Acc:MGI:97312]	0.00733278	0.417859	0.165	0.089	1	ARC
Ccnl2	cyclin L2 [Source:MGI Symbol;Acc:MGI:1927119]	0.00743437	0.319873	0.33	0.22	1	ARC
Fry	FRY microtubule binding protein [Source:MGI Symbol;Acc:MGI:2443895]	0.00755769	0.396342	0.661	0.535	1	ARC
Sgcd	sarcoglycan, delta (dystrophin-associated glycoprotein) [Source:MGI Symbol;Acc:MGI:1346525]	0.00821486	0.867017	0.243	0.148	1	ARC
Rev3l	REV3 like, DNA directed polymerase zeta catalytic subunit [Source:MGI Symbol;Acc:MGI:1337131]	0.00948483	0.45739	0.174	0.089	1	ARC
Atp1b2	ATPase, Na+/K+ transporting, beta 2 polypeptide [Source:MGI Symbol;Acc:MGI:88109]	1.17842e-12	0.29221	0.866	0.758	2.76751e-08	LHA
Fth1	ferritin heavy polypeptide 1 [Source:MGI Symbol;Acc:MGI:95588]	3.28233e-08	0.255323	0.734	0.622	0.000770855	LHA
Hes5	hes family bHLH transcription factor 5 [Source:MGI Symbol;Acc:MGI:104876]	5.55662e-08	0.352848	0.572	0.457	0.00130497	LHA
Luzp2	leucine zipper protein 2 [Source:MGI Symbol;Acc:MGI:1889615]	1.3327e-06	0.266616	0.543	0.453	0.0312985	LHA
Dynll1	dynein light chain LC8-type 1 [Source:MGI Symbol;Acc:MGI:1861457]	4.13342e-06	0.314607	0.461	0.37	0.0970733	LHA
Dynll1	dynein light chain LC8-type 1 [Source:MGI Symbol;Acc:MGI:1861457]	2.23883e-09	0.255927	0.51	0.37	5.25789e-05	SCN
Dynll1	dynein light chain LC8-type 1 [Source:MGI Symbol;Acc:MGI:1861457]	0.00627988	0.285656	0.469	0.379	1	VPH
Nrarp	Notch-regulated ankyrin repeat protein [Source:MGI Symbol;Acc:MGI:1914372]	4.48447e-05	0.302148	0.422	0.339	1	LHA
H3f3b	H3.3 histone B [Source:MGI Symbol;Acc:MGI:1101768]	0.000139875	0.295057	0.562	0.503	1	LHA
2810459M11Rik	RIKEN cDNA 2810459M11 gene [Source:MGI Symbol;Acc:MGI:1920042]	0.000190531	0.366689	0.213	0.162	1	LHA
B230323A14Rik	RIKEN cDNA B230323A14 gene [Source:MGI Symbol;Acc:MGI:2443084]	0.0003398	0.313277	0.25	0.19	1	LHA
Prkca	protein kinase C, alpha [Source:MGI Symbol;Acc:MGI:97595]	0.000629861	0.380813	0.21	0.171	1	LHA
Zfpm2	zinc finger protein, multitype 2 [Source:MGI Symbol;Acc:MGI:1334444]	0.000875192	0.365674	0.224	0.176	1	LHA
Prkd1	protein kinase D1 [Source:MGI Symbol;Acc:MGI:99879]	0.00218385	0.275094	0.235	0.193	1	LHA
Ptchd4	patched domain containing 4 [Source:MGI Symbol;Acc:MGI:1920485]	0.00371111	0.32922	0.166	0.134	1	LHA
Adgrl1	adhesion G protein-coupled receptor L1 [Source:MGI Symbol;Acc:MGI:1929461]	0.00795535	0.30883	0.163	0.134	1	LHA
Fnbp1	formin binding protein 1 [Source:MGI Symbol;Acc:MGI:109606]	0.00922133	0.30544	0.27	0.229	1	LHA
mt-Atp6	mitochondrially encoded ATP synthase 6 [Source:MGI Symbol;Acc:MGI:99927]	6.45024e-102	1.86365	0.541	0.337	1.51484e-97	MnPO
mt-Co1	mitochondrially encoded cytochrome c oxidase I [Source:MGI Symbol;Acc:MGI:102504]	7.49767e-76	1.46341	0.495	0.376	1.76083e-71	MnPO
mt-Cytb	mitochondrially encoded cytochrome b [Source:MGI Symbol;Acc:MGI:102501]	3.45455e-56	1.83826	0.338	0.154	8.11302e-52	MnPO
Scd2	stearoyl-Coenzyme A desaturase 2 [Source:MGI Symbol;Acc:MGI:98240]	7.15463e-56	0.709081	0.731	0.713	1.68027e-51	MnPO
Scd2	stearoyl-Coenzyme A desaturase 2 [Source:MGI Symbol;Acc:MGI:98240]	0.000254893	0.327401	0.818	0.71	1	PVN
Sparc	secreted acidic cysteine rich glycoprotein [Source:MGI Symbol;Acc:MGI:98373]	3.18235e-53	0.835524	0.619	0.61	7.47375e-49	MnPO
Sparc	secreted acidic cysteine rich glycoprotein [Source:MGI Symbol;Acc:MGI:98373]	3.29432e-05	0.576893	0.715	0.606	0.773671	PVN
Ndrg2	N-myc downstream regulated gene 2 [Source:MGI Symbol;Acc:MGI:1352498]	6.88844e-50	0.683542	0.666	0.68	1.61775e-45	MnPO
Itih3	inter-alpha trypsin inhibitor, heavy chain 3 [Source:MGI Symbol;Acc:MGI:96620]	7.82062e-48	0.704931	0.646	0.589	1.83667e-43	MnPO
Itih3	inter-alpha trypsin inhibitor, heavy chain 3 [Source:MGI Symbol;Acc:MGI:96620]	0.000226028	0.344645	0.719	0.592	1	PVN
Rpl41	ribosomal protein L41 [Source:MGI Symbol;Acc:MGI:1915195]	9.48971e-48	0.655467	0.52	0.549	2.22866e-43	MnPO
Serf2	small EDRK-rich factor 2 [Source:MGI Symbol;Acc:MGI:1337041]	1.37689e-46	0.621938	0.513	0.482	3.23362e-42	MnPO
Mlc1	megalencephalic leukoencephalopathy with subcortical cysts 1 homolog (human) [Source:MGI Symbol;Acc:MGI:2157910]	1.37439e-44	0.64384	0.485	0.455	3.22776e-40	MnPO
Rpl13	ribosomal protein L13 [Source:MGI Symbol;Acc:MGI:105922]	3.67958e-43	0.385847	0.393	0.457	8.64149e-39	MnPO
Rpl8	ribosomal protein L8 [Source:MGI Symbol;Acc:MGI:1350927]	2.27521e-40	0.311275	0.153	0.217	5.34334e-36	MnPO
Ntsr2	neurotensin receptor 2 [Source:MGI Symbol;Acc:MGI:108018]	2.29729e-39	0.392559	0.647	0.694	5.39519e-35	MnPO
mt-Nd2	mitochondrially encoded NADH dehydrogenase 2 [Source:MGI Symbol;Acc:MGI:102500]	5.14206e-39	1.43005	0.294	0.161	1.20761e-34	MnPO
Mt3	metallothionein 3 [Source:MGI Symbol;Acc:MGI:97173]	1.35141e-38	0.601783	0.617	0.561	3.17379e-34	MnPO
Itm2c	integral membrane protein 2C [Source:MGI Symbol;Acc:MGI:1927594]	2.16808e-38	0.284987	0.442	0.515	5.09173e-34	MnPO
Itm2c	integral membrane protein 2C [Source:MGI Symbol;Acc:MGI:1927594]	0.00689994	0.310907	0.591	0.497	1	PVN
Rps27	ribosomal protein S27 [Source:MGI Symbol;Acc:MGI:1888676]	7.5401e-38	0.268191	0.269	0.355	1.77079e-33	MnPO
mt-Nd4	mitochondrially encoded NADH dehydrogenase 4 [Source:MGI Symbol;Acc:MGI:102498]	1.63483e-37	1.55787	0.28	0.128	3.8394e-33	MnPO
Ndufc1	NADH:ubiquinone oxidoreductase subunit C1 [Source:MGI Symbol;Acc:MGI:1913627]	2.26128e-37	0.431617	0.317	0.35	5.31061e-33	MnPO
Rtn3	reticulon 3 [Source:MGI Symbol;Acc:MGI:1339970]	2.68344e-37	0.363333	0.309	0.346	6.30207e-33	MnPO
Rps29	ribosomal protein S29 [Source:MGI Symbol;Acc:MGI:107681]	3.24575e-37	0.710144	0.289	0.298	7.62265e-33	MnPO
Ttyh1	tweety family member 1 [Source:MGI Symbol;Acc:MGI:1889007]	4.50284e-37	0.544729	0.625	0.637	1.05749e-32	MnPO
Ttyh1	tweety family member 1 [Source:MGI Symbol;Acc:MGI:1889007]	0.0070612	0.391868	0.723	0.63	1	PVN
mt-Nd1	mitochondrially encoded NADH dehydrogenase 1 [Source:MGI Symbol;Acc:MGI:101787]	3.9861e-36	1.56652	0.269	0.096	9.36135e-32	MnPO
Tmbim6	transmembrane BAX inhibitor motif containing 6 [Source:MGI Symbol;Acc:MGI:99682]	2.50836e-35	0.409036	0.334	0.358	5.89089e-31	MnPO
Rpl37a	ribosomal protein L37a [Source:MGI Symbol;Acc:MGI:98068]	3.16381e-35	0.517904	0.271	0.296	7.43021e-31	MnPO
Psap	prosaposin [Source:MGI Symbol;Acc:MGI:97783]	9.12395e-35	0.290274	0.557	0.644	2.14276e-30	MnPO
Atp5k	ATP synthase, H+ transporting, mitochondrial F1F0 complex, subunit E [Source:MGI Symbol;Acc:MGI:106636]	2.37012e-34	0.305914	0.322	0.358	5.56623e-30	MnPO
Lamp1	lysosomal-associated membrane protein 1 [Source:MGI Symbol;Acc:MGI:96745]	2.45025e-33	0.401033	0.487	0.502	5.75441e-29	MnPO
Lamp1	lysosomal-associated membrane protein 1 [Source:MGI Symbol;Acc:MGI:96745]	0.00088177	0.299829	0.616	0.493	1	PVN
Eef2	eukaryotic translation elongation factor 2 [Source:MGI Symbol;Acc:MGI:95288]	4.08684e-33	0.258403	0.178	0.227	9.59793e-29	MnPO
2310022B05Rik	RIKEN cDNA 2310022B05 gene [Source:MGI Symbol;Acc:MGI:1916801]	4.57987e-33	0.25894	0.344	0.416	1.07558e-28	MnPO
Pafah1b1	platelet-activating factor acetylhydrolase, isoform 1b, subunit 1 [Source:MGI Symbol;Acc:MGI:109520]	5.78813e-33	0.310802	0.188	0.241	1.35934e-28	MnPO
Enho	energy homeostasis associated [Source:MGI Symbol;Acc:MGI:1916888]	8.6076e-33	0.256625	0.308	0.389	2.02149e-28	MnPO
mt-Co3	mitochondrially encoded cytochrome c oxidase III [Source:MGI Symbol;Acc:MGI:102502]	1.32923e-32	1.433	0.297	0.173	3.12171e-28	MnPO
Scg3	secretogranin III [Source:MGI Symbol;Acc:MGI:103032]	1.7282e-32	0.412199	0.305	0.357	4.05867e-28	MnPO
Scg3	secretogranin III [Source:MGI Symbol;Acc:MGI:103032]	0.00316679	0.438297	0.446	0.342	1	PVN
Ndufa3	NADH:ubiquinone oxidoreductase subunit A3 [Source:MGI Symbol;Acc:MGI:1913341]	2.88533e-32	0.431017	0.239	0.246	6.7762e-28	MnPO
Dbi	diazepam binding inhibitor [Source:MGI Symbol;Acc:MGI:94865]	3.25145e-32	0.497427	0.614	0.644	7.63604e-28	MnPO
Ubb	ubiquitin B [Source:MGI Symbol;Acc:MGI:98888]	8.61279e-32	0.353451	0.308	0.369	2.02271e-27	MnPO
Ywhae	tyrosine 3-monooxygenase/tryptophan 5-monooxygenase activation protein, epsilon polypeptide [Source:MGI Symbol;Acc:MGI:894689]	9.85502e-32	0.306513	0.306	0.374	2.31445e-27	MnPO
Cpe	carboxypeptidase E [Source:MGI Symbol;Acc:MGI:101932]	1.86327e-31	0.474339	0.776	0.783	4.37589e-27	MnPO
Cpe	carboxypeptidase E [Source:MGI Symbol;Acc:MGI:101932]	3.23462e-05	0.377512	0.876	0.776	0.759652	PVN
Adcyap1r1	adenylate cyclase activating polypeptide 1 receptor 1 [Source:MGI Symbol;Acc:MGI:108449]	2.0595e-31	0.416062	0.33	0.341	4.83674e-27	MnPO
Pea15a	proliferation and apoptosis adaptor protein 15A [Source:MGI Symbol;Acc:MGI:104799]	6.68321e-31	0.661923	0.265	0.235	1.56955e-26	MnPO
Lsm6	LSM6 homolog, U6 small nuclear RNA and mRNA degradation associated [Source:MGI Symbol;Acc:MGI:1925901]	1.01082e-30	0.280318	0.332	0.375	2.3739e-26	MnPO
Serinc1	serine incorporator 1 [Source:MGI Symbol;Acc:MGI:1926228]	1.37139e-30	0.283968	0.199	0.247	3.2207e-26	MnPO
D8Ertd738e	DNA segment, Chr 8, ERATO Doi 738, expressed [Source:MGI Symbol;Acc:MGI:1289231]	2.65378e-30	0.420868	0.271	0.283	6.23239e-26	MnPO
Chpt1	choline phosphotransferase 1 [Source:MGI Symbol;Acc:MGI:2384841]	3.44458e-30	0.316419	0.245	0.303	8.08959e-26	MnPO
Coa3	cytochrome C oxidase assembly factor 3 [Source:MGI Symbol;Acc:MGI:1098757]	9.77941e-30	0.52071	0.127	0.174	2.2967e-25	MnPO
Cops9	COP9 signalosome subunit 9 [Source:MGI Symbol;Acc:MGI:1914165]	1.87491e-29	0.4608	0.225	0.227	4.40324e-25	MnPO
Micos13	mitochondrial contact site and cristae organizing system subunit 13 [Source:MGI Symbol;Acc:MGI:2442174]	1.88683e-29	0.283676	0.115	0.164	4.43123e-25	MnPO
Lrp1	low density lipoprotein receptor-related protein 1 [Source:MGI Symbol;Acc:MGI:96828]	2.32059e-29	0.342437	0.297	0.338	5.4499e-25	MnPO
Arhgap5	Rho GTPase activating protein 5 [Source:MGI Symbol;Acc:MGI:1332637]	3.818e-29	0.271432	0.259	0.334	8.96657e-25	MnPO
Saraf	store-operated calcium entry-associated regulatory factor [Source:MGI Symbol;Acc:MGI:1915137]	4.89356e-29	0.266713	0.207	0.268	1.14925e-24	MnPO
1810037I17Rik	RIKEN cDNA 1810037I17 gene [Source:MGI Symbol;Acc:MGI:1914954]	1.00184e-28	0.25549	0.282	0.321	2.35283e-24	MnPO
Cox7c	cytochrome c oxidase subunit 7C [Source:MGI Symbol;Acc:MGI:103226]	1.7925e-28	0.328255	0.55	0.582	4.20968e-24	MnPO
Pygb	brain glycogen phosphorylase [Source:MGI Symbol;Acc:MGI:97828]	2.45845e-28	0.291211	0.296	0.328	5.77367e-24	MnPO
Tmem47	transmembrane protein 47 [Source:MGI Symbol;Acc:MGI:2177570]	2.59621e-28	0.372746	0.341	0.377	6.09721e-24	MnPO
Rps23	ribosomal protein S23 [Source:MGI Symbol;Acc:MGI:1913725]	2.92171e-28	0.293565	0.182	0.233	6.86165e-24	MnPO
Gprc5b	G protein-coupled receptor, family C, group 5, member B [Source:MGI Symbol;Acc:MGI:1927596]	6.33175e-28	0.266676	0.277	0.316	1.48701e-23	MnPO
mt-Co2	mitochondrially encoded cytochrome c oxidase II [Source:MGI Symbol;Acc:MGI:102503]	1.53538e-27	1.15239	0.249	0.167	3.60583e-23	MnPO
Rps19	ribosomal protein S19 [Source:MGI Symbol;Acc:MGI:1333780]	2.39845e-27	0.476164	0.22	0.26	5.63277e-23	MnPO
Rpl37	ribosomal protein L37 [Source:MGI Symbol;Acc:MGI:1914531]	3.50328e-27	0.509668	0.221	0.245	8.22745e-23	MnPO
Gm6145	predicted gene 6145 [Source:MGI Symbol;Acc:MGI:3779559]	5.86022e-27	0.31806	0.28	0.308	1.37627e-22	MnPO
Selenop	selenoprotein P [Source:MGI Symbol;Acc:MGI:894288]	8.2846e-27	0.336993	0.574	0.612	1.94564e-22	MnPO
Selenop	selenoprotein P [Source:MGI Symbol;Acc:MGI:894288]	3.51963e-12	0.290659	0.755	0.587	8.26584e-08	SCN
Selenok	selenoprotein K [Source:MGI Symbol;Acc:MGI:1931466]	1.14504e-26	0.252886	0.41	0.448	2.68914e-22	MnPO
Ckb	creatine kinase, brain [Source:MGI Symbol;Acc:MGI:88407]	1.30619e-26	0.423624	0.727	0.723	3.06758e-22	MnPO
Ckb	creatine kinase, brain [Source:MGI Symbol;Acc:MGI:88407]	0.000120556	0.297541	0.814	0.718	1	PVN
Ncan	neurocan [Source:MGI Symbol;Acc:MGI:104694]	1.59203e-26	0.349528	0.239	0.273	3.73889e-22	MnPO
Ubc	ubiquitin C [Source:MGI Symbol;Acc:MGI:98889]	1.75058e-26	0.271656	0.196	0.23	4.11124e-22	MnPO
Fau	Finkel-Biskis-Reilly murine sarcoma virus (FBR-MuSV) ubiquitously expressed (fox derived) [Source:MGI Symbol;Acc:MGI:102547]	2.56329e-26	0.296785	0.147	0.191	6.01988e-22	MnPO
Pkm	pyruvate kinase, muscle [Source:MGI Symbol;Acc:MGI:97591]	6.33121e-26	0.265203	0.208	0.241	1.48688e-21	MnPO
Gpld1	glycosylphosphatidylinositol specific phospholipase D1 [Source:MGI Symbol;Acc:MGI:106604]	6.36139e-26	0.284631	0.247	0.304	1.49397e-21	MnPO
Phpt1	phosphohistidine phosphatase 1 [Source:MGI Symbol;Acc:MGI:1922704]	9.15399e-26	0.364826	0.188	0.203	2.14982e-21	MnPO
Mir9-3hg	Mir9-3 host gene [Source:MGI Symbol;Acc:MGI:2142071]	1.36612e-25	0.281065	0.167	0.258	3.20833e-21	MnPO
Rpl31	ribosomal protein L31 [Source:MGI Symbol;Acc:MGI:2149632]	1.5276e-25	0.383326	0.214	0.223	3.58757e-21	MnPO
Ptch1	patched 1 [Source:MGI Symbol;Acc:MGI:105373]	1.82344e-25	0.333592	0.564	0.597	4.28236e-21	MnPO
Rps28	ribosomal protein S28 [Source:MGI Symbol;Acc:MGI:1859516]	1.82566e-25	0.629933	0.192	0.18	4.28756e-21	MnPO
Mlf2	myeloid leukemia factor 2 [Source:MGI Symbol;Acc:MGI:1353554]	2.00196e-25	0.570044	0.162	0.2	4.70159e-21	MnPO
Mlf2	myeloid leukemia factor 2 [Source:MGI Symbol;Acc:MGI:1353554]	0.00507597	0.265754	0.277	0.189	1	PVN
Atp5g2	ATP synthase, H+ transporting, mitochondrial F0 complex, subunit C2 (subunit 9) [Source:MGI Symbol;Acc:MGI:1915192]	2.59893e-25	0.340485	0.142	0.162	6.10359e-21	MnPO
Adgrb1	adhesion G protein-coupled receptor B1 [Source:MGI Symbol;Acc:MGI:1933736]	2.9408e-25	0.253115	0.22	0.253	6.90647e-21	MnPO
Hmgcs1	3-hydroxy-3-methylglutaryl-Coenzyme A synthase 1 [Source:MGI Symbol;Acc:MGI:107592]	3.6652e-25	0.748725	0.168	0.126	8.60773e-21	MnPO
Actb	actin, beta [Source:MGI Symbol;Acc:MGI:87904]	4.64373e-25	0.376882	0.221	0.234	1.09058e-20	MnPO
Rpl35	ribosomal protein L35 [Source:MGI Symbol;Acc:MGI:1913739]	4.72456e-25	0.726828	0.191	0.146	1.10956e-20	MnPO
Prdx2	peroxiredoxin 2 [Source:MGI Symbol;Acc:MGI:109486]	6.35355e-25	0.322008	0.15	0.189	1.49213e-20	MnPO
Gnai2	guanine nucleotide binding protein (G protein), alpha inhibiting 2 [Source:MGI Symbol;Acc:MGI:95772]	1.24928e-24	0.44447	0.195	0.224	2.93393e-20	MnPO
Cox8a	cytochrome c oxidase subunit 8A [Source:MGI Symbol;Acc:MGI:105959]	7.87871e-24	0.253269	0.599	0.65	1.85031e-19	MnPO
Paqr7	progestin and adipoQ receptor family member VII [Source:MGI Symbol;Acc:MGI:1919154]	2.72121e-23	0.283038	0.19	0.25	6.39077e-19	MnPO
S100a1	S100 calcium binding protein A1 [Source:MGI Symbol;Acc:MGI:1338917]	3.70723e-23	0.267681	0.241	0.265	8.70644e-19	MnPO
Gabrb1	gamma-aminobutyric acid (GABA) A receptor, subunit beta 1 [Source:MGI Symbol;Acc:MGI:95619]	4.08596e-23	0.27474	0.422	0.461	9.59587e-19	MnPO
Agpat3	1-acylglycerol-3-phosphate O-acyltransferase 3 [Source:MGI Symbol;Acc:MGI:1336186]	2.84149e-22	0.329562	0.227	0.241	6.67325e-18	MnPO
Fads1	fatty acid desaturase 1 [Source:MGI Symbol;Acc:MGI:1923517]	6.77153e-22	0.309758	0.214	0.241	1.59029e-17	MnPO
Rps18	ribosomal protein S18 [Source:MGI Symbol;Acc:MGI:98146]	1.43375e-21	0.329753	0.159	0.175	3.36715e-17	MnPO
Pebp1	phosphatidylethanolamine binding protein 1 [Source:MGI Symbol;Acc:MGI:1344408]	2.47284e-21	0.361446	0.139	0.156	5.80746e-17	MnPO
Tomm7	translocase of outer mitochondrial membrane 7 [Source:MGI Symbol;Acc:MGI:1913419]	4.0639e-21	0.320292	0.162	0.174	9.54407e-17	MnPO
Selenot	selenoprotein T [Source:MGI Symbol;Acc:MGI:1916477]	1.06532e-20	0.520157	0.154	0.135	2.5019e-16	MnPO
Hsd17b12	hydroxysteroid (17-beta) dehydrogenase 12 [Source:MGI Symbol;Acc:MGI:1926967]	1.61115e-20	0.427967	0.141	0.152	3.78379e-16	MnPO
Tmem229a	transmembrane protein 229A [Source:MGI Symbol;Acc:MGI:2442812]	1.85013e-20	0.305855	0.188	0.202	4.34503e-16	MnPO
Scd1	stearoyl-Coenzyme A desaturase 1 [Source:MGI Symbol;Acc:MGI:98239]	2.20324e-20	0.937537	0.163	0.09	5.17431e-16	MnPO
Phgdh	3-phosphoglycerate dehydrogenase [Source:MGI Symbol;Acc:MGI:1355330]	3.22424e-20	0.258352	0.145	0.166	7.57214e-16	MnPO
Rps3a1	ribosomal protein S3A1 [Source:MGI Symbol;Acc:MGI:1202063]	3.77364e-20	0.353474	0.154	0.181	8.86239e-16	MnPO
Paqr6	progestin and adipoQ receptor family member VI [Source:MGI Symbol;Acc:MGI:1916207]	4.27172e-20	0.502927	0.176	0.158	1.00321e-15	MnPO
Bsg	basigin [Source:MGI Symbol;Acc:MGI:88208]	5.40975e-20	0.434269	0.159	0.167	1.27048e-15	MnPO
Nipbl	NIPBL cohesin loading factor [Source:MGI Symbol;Acc:MGI:1913976]	6.03207e-20	0.296487	0.119	0.166	1.41663e-15	MnPO
Ciapin1	cytokine induced apoptosis inhibitor 1 [Source:MGI Symbol;Acc:MGI:1922083]	8.09829e-20	0.954042	0.155	0.087	1.90188e-15	MnPO
Rac1	Rac family small GTPase 1 [Source:MGI Symbol;Acc:MGI:97845]	1.13884e-19	0.34241	0.155	0.178	2.67456e-15	MnPO
Rac1	Rac family small GTPase 1 [Source:MGI Symbol;Acc:MGI:97845]	0.00534607	0.48064	0.248	0.169	1	PVN
Prxl2a	peroxiredoxin like 2A [Source:MGI Symbol;Acc:MGI:1917814]	1.23883e-19	0.375946	0.19	0.19	2.90939e-15	MnPO
Prxl2a	peroxiredoxin like 2A [Source:MGI Symbol;Acc:MGI:1917814]	0.0005478	0.510993	0.289	0.184	1	PVN
Mir100hg	Mir100 Mirlet7a-2 Mir125b-1 cluster host gene [Source:MGI Symbol;Acc:MGI:1920394]	1.56679e-19	0.254459	0.131	0.151	3.67961e-15	MnPO
Appl2	adaptor protein, phosphotyrosine interaction, PH domain and leucine zipper containing 2 [Source:MGI Symbol;Acc:MGI:2384914]	2.04616e-19	0.366101	0.162	0.186	4.80541e-15	MnPO
Cntn1	contactin 1 [Source:MGI Symbol;Acc:MGI:105980]	3.47148e-19	0.642846	0.153	0.115	8.15277e-15	MnPO
Tpt1	tumor protein, translationally-controlled 1 [Source:MGI Symbol;Acc:MGI:104890]	3.89769e-19	0.350865	0.172	0.175	9.15373e-15	MnPO
Rps27a	ribosomal protein S27A [Source:MGI Symbol;Acc:MGI:1925544]	5.91719e-19	0.645023	0.178	0.149	1.38965e-14	MnPO
Rpl32	ribosomal protein L32 [Source:MGI Symbol;Acc:MGI:98038]	9.58859e-19	0.447686	0.176	0.19	2.25188e-14	MnPO
Npc2	NPC intracellular cholesterol transporter 2 [Source:MGI Symbol;Acc:MGI:1915213]	1.66148e-18	0.314252	0.17	0.198	3.90198e-14	MnPO
Sdc3	syndecan 3 [Source:MGI Symbol;Acc:MGI:1349163]	1.92942e-18	0.436099	0.151	0.145	4.53125e-14	MnPO
Mrpl42	mitochondrial ribosomal protein L42 [Source:MGI Symbol;Acc:MGI:1333774]	4.21799e-18	0.266945	0.175	0.213	9.90596e-14	MnPO
Nt5c2	5'-nucleotidase, cytosolic II [Source:MGI Symbol;Acc:MGI:2178563]	5.32256e-18	0.321867	0.179	0.2	1.25e-13	MnPO
Zcchc24	zinc finger, CCHC domain containing 24 [Source:MGI Symbol;Acc:MGI:1919168]	5.7518e-18	0.34951	0.154	0.156	1.35081e-13	MnPO
Mmp14	matrix metallopeptidase 14 (membrane-inserted) [Source:MGI Symbol;Acc:MGI:101900]	1.11045e-17	0.251595	0.191	0.208	2.60788e-13	MnPO
Slc1a2	solute carrier family 1 (glial high affinity glutamate transporter), member 2 [Source:MGI Symbol;Acc:MGI:101931]	1.20298e-17	0.293996	0.861	0.889	2.82519e-13	MnPO
Epas1	endothelial PAS domain protein 1 [Source:MGI Symbol;Acc:MGI:109169]	1.23607e-17	0.259096	0.131	0.154	2.9029e-13	MnPO
Clstn1	calsyntenin 1 [Source:MGI Symbol;Acc:MGI:1929895]	1.36523e-17	0.257493	0.145	0.163	3.20624e-13	MnPO
Cnp	2',3'-cyclic nucleotide 3' phosphodiesterase [Source:MGI Symbol;Acc:MGI:88437]	2.9929e-17	0.543052	0.199	0.202	7.02882e-13	MnPO
Fam107a	family with sequence similarity 107, member A [Source:MGI Symbol;Acc:MGI:3041256]	2.99663e-17	0.354098	0.195	0.198	7.03758e-13	MnPO
Gnb1	guanine nucleotide binding protein (G protein), beta 1 [Source:MGI Symbol;Acc:MGI:95781]	5.43634e-17	0.316856	0.158	0.163	1.27672e-12	MnPO
Rpl38	ribosomal protein L38 [Source:MGI Symbol;Acc:MGI:1914921]	3.41688e-16	0.437547	0.151	0.152	8.02455e-12	MnPO
Rplp1	ribosomal protein, large, P1 [Source:MGI Symbol;Acc:MGI:1927099]	3.67741e-16	0.317003	0.137	0.15	8.6364e-12	MnPO
Chchd10	coiled-coil-helix-coiled-coil-helix domain containing 10 [Source:MGI Symbol;Acc:MGI:2143558]	6.25651e-16	0.286778	0.346	0.346	1.46934e-11	MnPO
Chchd10	coiled-coil-helix-coiled-coil-helix domain containing 10 [Source:MGI Symbol;Acc:MGI:2143558]	6.4814e-06	0.429174	0.476	0.336	0.152216	VPH
Tuba1a	tubulin, alpha 1A [Source:MGI Symbol;Acc:MGI:98869]	2.20471e-15	0.509801	0.172	0.149	5.17776e-11	MnPO
Klhl5	kelch-like 5 [Source:MGI Symbol;Acc:MGI:1919028]	8.62074e-15	0.387275	0.137	0.174	2.02458e-10	MnPO
Padi2	peptidyl arginine deiminase, type II [Source:MGI Symbol;Acc:MGI:1338892]	1.79047e-13	0.352409	0.154	0.149	4.20491e-09	MnPO
Padi2	peptidyl arginine deiminase, type II [Source:MGI Symbol;Acc:MGI:1338892]	0.00332023	0.397728	0.227	0.145	1	PVN
Tmsb4x	thymosin, beta 4, X chromosome [Source:MGI Symbol;Acc:MGI:99510]	2.1487e-13	0.300766	0.17	0.189	5.04622e-09	MnPO
Tmsb4x	thymosin, beta 4, X chromosome [Source:MGI Symbol;Acc:MGI:99510]	1.40581e-13	0.581043	0.266	0.158	3.30156e-09	VMH
Slc6a11	solute carrier family 6 (neurotransmitter transporter, GABA), member 11 [Source:MGI Symbol;Acc:MGI:95630]	6.37045e-12	0.253591	0.915	0.934	1.4961e-07	MnPO
Gfap	glial fibrillary acidic protein [Source:MGI Symbol;Acc:MGI:95697]	1.1611e-07	0.421266	0.212	0.139	0.00272684	MnPO
Gfap	glial fibrillary acidic protein [Source:MGI Symbol;Acc:MGI:95697]	0.00240253	0.61977	0.231	0.147	1	PVN
Malat1	metastasis associated lung adenocarcinoma transcript 1 (non-coding RNA) [Source:MGI Symbol;Acc:MGI:1919539]	3.27464e-18	0.260504	1	0.998	7.6905e-14	POA
Gria2	glutamate receptor, ionotropic, AMPA2 (alpha 2) [Source:MGI Symbol;Acc:MGI:95809]	2.02086e-08	0.32898	0.597	0.466	0.000474598	POA
Gria2	glutamate receptor, ionotropic, AMPA2 (alpha 2) [Source:MGI Symbol;Acc:MGI:95809]	1.17023e-05	0.508956	0.608	0.474	0.274828	VPH
Dbp	D site albumin promoter binding protein [Source:MGI Symbol;Acc:MGI:94866]	7.47552e-08	0.44143	0.38	0.264	0.00175563	POA
Xist	inactive X specific transcripts [Source:MGI Symbol;Acc:MGI:98974]	1.00569e-06	0.308864	0.736	0.633	0.0236186	POA
Xist	inactive X specific transcripts [Source:MGI Symbol;Acc:MGI:98974]	3.09281e-20	0.359251	0.755	0.611	7.26347e-16	VMH
Xist	inactive X specific transcripts [Source:MGI Symbol;Acc:MGI:98974]	6.29104e-14	0.462116	0.839	0.633	1.47745e-09	VPH
Tspan7	tetraspanin 7 [Source:MGI Symbol;Acc:MGI:1298407]	3.46705e-06	0.457609	0.334	0.256	0.0814237	POA
Ldhb	lactate dehydrogenase B [Source:MGI Symbol;Acc:MGI:96763]	0.000144883	0.272043	0.511	0.423	1	POA
Prdx1	peroxiredoxin 1 [Source:MGI Symbol;Acc:MGI:99523]	0.000171633	0.380239	0.321	0.24	1	POA
Cspg5	chondroitin sulfate proteoglycan 5 [Source:MGI Symbol;Acc:MGI:1352747]	0.000206692	0.418927	0.449	0.386	1	POA
Son	Son DNA binding protein [Source:MGI Symbol;Acc:MGI:98353]	0.000318697	0.279537	0.632	0.566	1	POA
Son	Son DNA binding protein [Source:MGI Symbol;Acc:MGI:98353]	6.53298e-07	0.329287	0.736	0.566	0.0153427	PVN
Son	Son DNA binding protein [Source:MGI Symbol;Acc:MGI:98353]	1.10973e-19	0.386404	0.693	0.535	2.6062e-15	VMH
Rgcc	regulator of cell cycle [Source:MGI Symbol;Acc:MGI:1913464]	0.000679675	0.252333	0.348	0.274	1	POA
Rgcc	regulator of cell cycle [Source:MGI Symbol;Acc:MGI:1913464]	3.28256e-05	0.323771	0.399	0.275	0.77091	VPH
Mgat4c	MGAT4 family, member C [Source:MGI Symbol;Acc:MGI:1914819]	0.000934305	0.335416	0.388	0.325	1	POA
Cadm1	cell adhesion molecule 1 [Source:MGI Symbol;Acc:MGI:1889272]	0.000994919	0.339019	0.266	0.215	1	POA
Hmgn3	high mobility group nucleosomal binding domain 3 [Source:MGI Symbol;Acc:MGI:2138069]	0.00200486	0.260405	0.287	0.221	1	POA
Gnao1	guanine nucleotide binding protein, alpha O [Source:MGI Symbol;Acc:MGI:95775]	0.00224969	0.351277	0.22	0.181	1	POA
Lpp	LIM domain containing preferred translocation partner in lipoma [Source:MGI Symbol;Acc:MGI:2441849]	0.00455651	0.534962	0.301	0.244	1	POA
Rpl7a	ribosomal protein L7A [Source:MGI Symbol;Acc:MGI:1353472]	0.00633973	0.30993	0.183	0.148	1	POA
Sik3	SIK family kinase 3 [Source:MGI Symbol;Acc:MGI:2446296]	0.00840943	0.316166	0.208	0.169	1	POA
Nnat	neuronatin [Source:MGI Symbol;Acc:MGI:104716]	5.83431e-28	1.00304	0.806	0.479	1.37019e-23	PVN
Jun	jun proto-oncogene [Source:MGI Symbol;Acc:MGI:96646]	1.53654e-12	1.04088	0.153	0.032	3.60857e-08	PVN
Sorbs1	sorbin and SH3 domain containing 1 [Source:MGI Symbol;Acc:MGI:700014]	3.05344e-10	0.601128	0.624	0.417	7.17101e-06	PVN
Agt	angiotensinogen (serpin peptidase inhibitor, clade A, member 8) [Source:MGI Symbol;Acc:MGI:87963]	1.20163e-09	0.533505	0.74	0.55	2.82204e-05	PVN
Agt	angiotensinogen (serpin peptidase inhibitor, clade A, member 8) [Source:MGI Symbol;Acc:MGI:87963]	7.0011e-19	0.29876	0.748	0.538	1.64421e-14	SCN
Cst3	cystatin C [Source:MGI Symbol;Acc:MGI:102519]	3.77754e-07	0.262736	1	0.995	0.00887155	PVN
Cst3	cystatin C [Source:MGI Symbol;Acc:MGI:102519]	9.41237e-13	0.259948	0.996	0.995	2.21049e-08	SCN
Arpp21	cyclic AMP-regulated phosphoprotein, 21 [Source:MGI Symbol;Acc:MGI:107562]	5.09084e-06	0.588886	0.219	0.109	0.119558	PVN
Marcks	myristoylated alanine rich protein kinase C substrate [Source:MGI Symbol;Acc:MGI:96907]	1.11284e-05	0.565228	0.38	0.247	0.26135	PVN
Mdga2	MAM domain containing glycosylphosphatidylinositol anchor 2 [Source:MGI Symbol;Acc:MGI:2444706]	0.000119019	0.296956	0.802	0.677	1	PVN
Sorl1	sortilin-related receptor, LDLR class A repeats-containing [Source:MGI Symbol;Acc:MGI:1202296]	0.00017487	0.292054	0.293	0.189	1	PVN
Chd4	chromodomain helicase DNA binding protein 4 [Source:MGI Symbol;Acc:MGI:1344380]	0.000439155	0.442101	0.227	0.134	1	PVN
Adcy8	adenylate cyclase 8 [Source:MGI Symbol;Acc:MGI:1341110]	0.000528769	0.555957	0.318	0.211	1	PVN
Svbp	small vasohibin binding protein [Source:MGI Symbol;Acc:MGI:1916466]	0.00127705	0.612294	0.182	0.112	1	PVN
Pias1	protein inhibitor of activated STAT 1 [Source:MGI Symbol;Acc:MGI:1913125]	0.00146421	0.348018	0.273	0.179	1	PVN
Ptprt	protein tyrosine phosphatase, receptor type, T [Source:MGI Symbol;Acc:MGI:1321152]	0.00178599	0.33972	0.331	0.231	1	PVN
Eef1d	eukaryotic translation elongation factor 1 delta (guanine nucleotide exchange protein) [Source:MGI Symbol;Acc:MGI:1913906]	0.00315344	0.520291	0.157	0.087	1	PVN
Rrbp1	ribosome binding protein 1 [Source:MGI Symbol;Acc:MGI:1932395]	0.00363194	0.346285	0.269	0.182	1	PVN
Emp2	epithelial membrane protein 2 [Source:MGI Symbol;Acc:MGI:1098726]	0.00365328	0.268223	0.169	0.106	1	PVN
Mapk4	mitogen-activated protein kinase 4 [Source:MGI Symbol;Acc:MGI:2444559]	0.00427179	0.430992	0.306	0.213	1	PVN
Plxnb1	plexin B1 [Source:MGI Symbol;Acc:MGI:2154238]	0.00434441	0.433003	0.281	0.197	1	PVN
Gabbr1	gamma-aminobutyric acid (GABA) B receptor, 1 [Source:MGI Symbol;Acc:MGI:1860139]	0.00439508	0.36671	0.483	0.386	1	PVN
Pura	purine rich element binding protein A [Source:MGI Symbol;Acc:MGI:103079]	0.00500814	0.379137	0.157	0.09	1	PVN
Pcx	pyruvate carboxylase [Source:MGI Symbol;Acc:MGI:97520]	0.0072663	0.276589	0.223	0.148	1	PVN
Gstm1	glutathione S-transferase, mu 1 [Source:MGI Symbol;Acc:MGI:95860]	0.00807581	0.294005	0.322	0.234	1	PVN
Csdc2	cold shock domain containing C2, RNA binding [Source:MGI Symbol;Acc:MGI:2146027]	0.00997236	0.391081	0.186	0.117	1	PVN
Apoe	apolipoprotein E [Source:MGI Symbol;Acc:MGI:88057]	3.01165e-19	0.320593	1	0.996	7.07286e-15	SCN
Mt2	metallothionein 2 [Source:MGI Symbol;Acc:MGI:97172]	3.81073e-16	0.383146	0.833	0.647	8.9495e-12	SCN
Cox4i1	cytochrome c oxidase subunit 4I1 [Source:MGI Symbol;Acc:MGI:88473]	2.44898e-14	0.290366	0.599	0.422	5.75144e-10	SCN
Rab2a	RAB2A, member RAS oncogene family [Source:MGI Symbol;Acc:MGI:1928750]	9.23018e-14	0.296597	0.258	0.146	2.16771e-09	SCN
Atp5g1	ATP synthase, H+ transporting, mitochondrial F0 complex, subunit C1 (subunit 9) [Source:MGI Symbol;Acc:MGI:107653]	9.99924e-14	0.376029	0.349	0.204	2.34832e-09	SCN
Atp5g1	ATP synthase, H+ transporting, mitochondrial F0 complex, subunit C1 (subunit 9) [Source:MGI Symbol;Acc:MGI:107653]	1.30475e-08	0.338383	0.282	0.198	0.00030642	VMH
Atp5g1	ATP synthase, H+ transporting, mitochondrial F0 complex, subunit C1 (subunit 9) [Source:MGI Symbol;Acc:MGI:107653]	1.51976e-05	0.438844	0.331	0.211	0.356916	VPH
Ndufa4	Ndufa4, mitochondrial complex associated [Source:MGI Symbol;Acc:MGI:107686]	6.84505e-13	0.356179	0.547	0.378	1.60756e-08	SCN
Hspa8	heat shock protein 8 [Source:MGI Symbol;Acc:MGI:105384]	4.66738e-12	0.310399	0.636	0.464	1.09613e-07	SCN
Hspa8	heat shock protein 8 [Source:MGI Symbol;Acc:MGI:105384]	2.02602e-07	0.549746	0.633	0.471	0.00475811	VPH
Tubb2a	tubulin, beta 2A class IIA [Source:MGI Symbol;Acc:MGI:107861]	1.34307e-11	0.322721	0.319	0.197	3.1542e-07	SCN
Rpl24	ribosomal protein L24 [Source:MGI Symbol;Acc:MGI:1915443]	1.62841e-11	0.267592	0.38	0.249	3.82433e-07	SCN
Atp6v0c	ATPase, H+ transporting, lysosomal V0 subunit C [Source:MGI Symbol;Acc:MGI:88116]	7.43791e-11	0.290591	0.308	0.192	1.74679e-06	SCN
Tecpr2	tectonin beta-propeller repeat containing 2 [Source:MGI Symbol;Acc:MGI:2144865]	3.13808e-10	0.333215	0.208	0.116	7.36978e-06	SCN
Nr2f1	nuclear receptor subfamily 2, group F, member 1 [Source:MGI Symbol;Acc:MGI:1352451]	1.01568e-09	0.383576	0.252	0.149	2.38532e-05	SCN
Sec61b	Sec61 beta subunit [Source:MGI Symbol;Acc:MGI:1913462]	1.50556e-09	0.397855	0.217	0.12	3.53581e-05	SCN
Gm8797	predicted pseudogene 8797 [Source:MGI Symbol;Acc:MGI:3643769]	1.54475e-09	0.281048	0.297	0.192	3.62784e-05	SCN
Pfdn1	prefoldin 1 [Source:MGI Symbol;Acc:MGI:1914449]	3.93553e-09	0.256388	0.182	0.105	9.24258e-05	SCN
Tst	thiosulfate sulfurtransferase, mitochondrial [Source:MGI Symbol;Acc:MGI:98852]	3.98325e-09	0.290132	0.319	0.21	9.35467e-05	SCN
Strbp	spermatid perinuclear RNA binding protein [Source:MGI Symbol;Acc:MGI:104626]	8.74789e-09	0.273025	0.221	0.166	0.000205444	SCN
Dhrs1	dehydrogenase/reductase (SDR family) member 1 [Source:MGI Symbol;Acc:MGI:1196314]	9.78705e-09	0.378168	0.165	0.084	0.000229849	SCN
Id4	inhibitor of DNA binding 4 [Source:MGI Symbol;Acc:MGI:99414]	2.02415e-08	0.473586	0.273	0.163	0.000475371	SCN
Ube2e2	ubiquitin-conjugating enzyme E2E 2 [Source:MGI Symbol;Acc:MGI:2384997]	3.84187e-08	0.312365	0.215	0.13	0.000902263	SCN
Gm2a	GM2 ganglioside activator protein [Source:MGI Symbol;Acc:MGI:95762]	4.60045e-08	0.355831	0.367	0.258	0.00108041	SCN
Csmd3	CUB and Sushi multiple domains 3 [Source:MGI Symbol;Acc:MGI:2386403]	4.89161e-08	0.334041	0.21	0.124	0.0011488	SCN
Apoc1	apolipoprotein C-I [Source:MGI Symbol;Acc:MGI:88053]	5.22375e-08	0.309059	0.295	0.192	0.0012268	SCN
Dok6	docking protein 6 [Source:MGI Symbol;Acc:MGI:3639495]	6.59705e-08	0.274031	0.15	0.077	0.00154932	SCN
Aplp1	amyloid beta (A4) precursor-like protein 1 [Source:MGI Symbol;Acc:MGI:88046]	9.41134e-08	0.316003	0.191	0.11	0.00221025	SCN
Gm11714	predicted gene 11714 [Source:MGI Symbol;Acc:MGI:3649214]	9.91168e-08	0.255512	0.297	0.203	0.00232776	SCN
Ccdc28b	coiled coil domain containing 28B [Source:MGI Symbol;Acc:MGI:1913514]	1.06166e-07	0.303917	0.191	0.11	0.00249331	SCN
Pfn2	profilin 2 [Source:MGI Symbol;Acc:MGI:97550]	1.56045e-07	0.349543	0.197	0.119	0.00366471	SCN
Lxn	latexin [Source:MGI Symbol;Acc:MGI:107633]	2.33472e-07	0.286083	0.354	0.252	0.00548308	SCN
Gm29683	predicted gene, 29683 [Source:MGI Symbol;Acc:MGI:5588842]	5.09778e-07	0.252751	0.271	0.18	0.0119721	SCN
Ahcyl1	S-adenosylhomocysteine hydrolase-like 1 [Source:MGI Symbol;Acc:MGI:2385184]	6.71504e-07	0.322513	0.351	0.296	0.0157703	SCN
Irak2	interleukin-1 receptor-associated kinase 2 [Source:MGI Symbol;Acc:MGI:2429603]	9.29198e-07	0.261185	0.15	0.088	0.0218222	SCN
Ppp2r5a	protein phosphatase 2, regulatory subunit B', alpha [Source:MGI Symbol;Acc:MGI:2388479]	1.11252e-06	0.258005	0.215	0.14	0.0261276	SCN
Brk1	BRICK1, SCAR/WAVE actin-nucleating complex subunit [Source:MGI Symbol;Acc:MGI:1915406]	1.49612e-06	0.40793	0.176	0.097	0.0351363	SCN
Fam181b	family with sequence similarity 181, member B [Source:MGI Symbol;Acc:MGI:1930951]	1.51647e-06	0.274504	0.302	0.209	0.0356142	SCN
Fam181b	family with sequence similarity 181, member B [Source:MGI Symbol;Acc:MGI:1930951]	0.00509491	0.26328	0.253	0.207	1	VMH
Atp5h	ATP synthase, H+ transporting, mitochondrial F0 complex, subunit D [Source:MGI Symbol;Acc:MGI:1918929]	2.76232e-06	0.25401	0.297	0.212	0.064873	SCN
Gadd45g	growth arrest and DNA-damage-inducible 45 gamma [Source:MGI Symbol;Acc:MGI:1346325]	3.16868e-06	0.403788	0.189	0.111	0.0744165	SCN
Rab34	RAB34, member RAS oncogene family [Source:MGI Symbol;Acc:MGI:104606]	4.50273e-06	0.397546	0.219	0.135	0.105747	SCN
Ndufc2	NADH:ubiquinone oxidoreductase subunit C2 [Source:MGI Symbol;Acc:MGI:1344370]	1.29024e-05	0.266472	0.232	0.157	0.303013	SCN
Clic4	chloride intracellular channel 4 (mitochondrial) [Source:MGI Symbol;Acc:MGI:1352754]	1.54143e-05	0.376803	0.291	0.212	0.362005	SCN
Tmem178b	transmembrane protein 178B [Source:MGI Symbol;Acc:MGI:3647581]	1.82617e-05	0.325133	0.158	0.097	0.428877	SCN
Id3	inhibitor of DNA binding 3 [Source:MGI Symbol;Acc:MGI:96398]	2.42612e-05	0.298974	0.401	0.297	0.569774	SCN
Taf13	TATA-box binding protein associated factor 13 [Source:MGI Symbol;Acc:MGI:1913500]	3.44286e-05	0.583069	0.226	0.143	0.808556	SCN
Grid1	glutamate receptor, ionotropic, delta 1 [Source:MGI Symbol;Acc:MGI:95812]	3.49258e-05	0.316545	0.21	0.163	0.820233	SCN
Slc12a4	solute carrier family 12, member 4 [Source:MGI Symbol;Acc:MGI:1309465]	5.67415e-05	0.286275	0.165	0.104	1	SCN
Rfx3	regulatory factor X, 3 (influences HLA class II expression) [Source:MGI Symbol;Acc:MGI:106582]	6.08023e-05	0.255277	0.154	0.098	1	SCN
Lcat	lecithin cholesterol acyltransferase [Source:MGI Symbol;Acc:MGI:96755]	6.08246e-05	0.263201	0.15	0.094	1	SCN
Ndufb2	NADH:ubiquinone oxidoreductase subunit B2 [Source:MGI Symbol;Acc:MGI:1915448]	0.00011579	0.357003	0.275	0.211	1	SCN
Chka	choline kinase alpha [Source:MGI Symbol;Acc:MGI:107760]	0.000133026	0.325441	0.191	0.138	1	SCN
Cd9	CD9 antigen [Source:MGI Symbol;Acc:MGI:88348]	0.000176181	0.260635	0.217	0.158	1	SCN
Antxr1	anthrax toxin receptor 1 [Source:MGI Symbol;Acc:MGI:1916788]	0.000223217	0.287783	0.156	0.101	1	SCN
Dynlrb1	dynein light chain roadblock-type 1 [Source:MGI Symbol;Acc:MGI:1914318]	0.000289694	0.268635	0.189	0.128	1	SCN
Rex1bd	required for excision 1-B domain containing [Source:MGI Symbol;Acc:MGI:1913712]	0.000627082	0.380127	0.18	0.117	1	SCN
Mrps21	mitochondrial ribosomal protein S21 [Source:MGI Symbol;Acc:MGI:1913542]	0.00067475	0.315141	0.193	0.14	1	SCN
Slc24a3	solute carrier family 24 (sodium/potassium/calcium exchanger), member 3 [Source:MGI Symbol;Acc:MGI:2137513]	0.000719357	0.490022	0.178	0.118	1	SCN
Polr3h	polymerase (RNA) III (DNA directed) polypeptide H [Source:MGI Symbol;Acc:MGI:1926179]	0.00103158	0.259198	0.178	0.13	1	SCN
Slc7a11	solute carrier family 7 (cationic amino acid transporter, y+ system), member 11 [Source:MGI Symbol;Acc:MGI:1347355]	0.00147407	0.424635	0.236	0.193	1	SCN
Ppp1r3c	protein phosphatase 1, regulatory subunit 3C [Source:MGI Symbol;Acc:MGI:1858229]	0.00267337	0.377072	0.169	0.119	1	SCN
Tprkb	Tp53rk binding protein [Source:MGI Symbol;Acc:MGI:1917036]	0.00342204	0.256084	0.232	0.173	1	SCN
Bbip1	BBSome interacting protein 1 [Source:MGI Symbol;Acc:MGI:1913610]	0.00420429	0.268109	0.174	0.12	1	SCN
Tmem223	transmembrane protein 223 [Source:MGI Symbol;Acc:MGI:1914086]	0.00460976	0.283993	0.171	0.126	1	SCN
Acss1	acyl-CoA synthetase short-chain family member 1 [Source:MGI Symbol;Acc:MGI:1915988]	0.00853598	0.274028	0.312	0.274	1	SCN
Tsix	X (inactive)-specific transcript, opposite strand [Source:MGI Symbol;Acc:MGI:1336196]	2.2762e-86	1.57308	0.274	0.046	5.34565e-82	VMH
Uba52	ubiquitin A-52 residue ribosomal protein fusion product 1 [Source:MGI Symbol;Acc:MGI:98887]	1.55515e-15	0.533612	0.353	0.224	3.65228e-11	VMH
Ppia	peptidylprolyl isomerase A [Source:MGI Symbol;Acc:MGI:97749]	1.048e-12	0.388917	0.375	0.257	2.46123e-08	VMH
Atp5md	ATP synthase membrane subunit DAPIT [Source:MGI Symbol;Acc:MGI:1891435]	2.69266e-12	0.435687	0.286	0.181	6.32371e-08	VMH
Gas5	growth arrest specific 5 [Source:MGI Symbol;Acc:MGI:95659]	1.26748e-06	0.381846	0.215	0.147	0.0297668	VMH
Sash1	SAM and SH3 domain containing 1 [Source:MGI Symbol;Acc:MGI:1917347]	4.68722e-06	0.262696	0.399	0.321	0.110079	VMH
Rims2	regulating synaptic membrane exocytosis 2 [Source:MGI Symbol;Acc:MGI:2152972]	0.00114793	0.280281	0.163	0.119	1	VMH
Fis1	fission, mitochondrial 1 [Source:MGI Symbol;Acc:MGI:1913687]	0.0028949	0.262418	0.157	0.117	1	VMH
Ehbp1	EH domain binding protein 1 [Source:MGI Symbol;Acc:MGI:2667252]	0.004093	0.258034	0.206	0.162	1	VMH
Dcc	deleted in colorectal carcinoma [Source:MGI Symbol;Acc:MGI:94869]	3.197e-44	1.70269	0.302	0.042	7.50815e-40	VPH
Ralyl	RALY RNA binding protein-like [Source:MGI Symbol;Acc:MGI:1924147]	2.25799e-24	1.46121	0.154	0.02	5.30289e-20	VPH
Lix1	limb and CNS expressed 1 [Source:MGI Symbol;Acc:MGI:1913893]	3.38737e-22	1.13434	0.334	0.111	7.95525e-18	VPH
Arhgef28	Rho guanine nucleotide exchange factor (GEF) 28 [Source:MGI Symbol;Acc:MGI:1346016]	1.03127e-17	1.00717	0.161	0.031	2.42193e-13	VPH
Thrsp	thyroid hormone responsive [Source:MGI Symbol;Acc:MGI:109126]	1.57288e-09	0.602633	0.309	0.158	3.69392e-05	VPH
Swi5	SWI5 recombination repair homolog (yeast) [Source:MGI Symbol;Acc:MGI:1920181]	4.7114e-08	0.616592	0.241	0.118	0.00110647	VPH
Atp5c1	ATP synthase, H+ transporting, mitochondrial F1 complex, gamma polypeptide 1 [Source:MGI Symbol;Acc:MGI:1261437]	2.07855e-06	0.283763	0.286	0.18	0.0488148	VPH
Mt1	metallothionein 1 [Source:MGI Symbol;Acc:MGI:97171]	5.53929e-06	0.259162	0.981	0.952	0.13009	VPH
Prr16	proline rich 16 [Source:MGI Symbol;Acc:MGI:1918623]	5.87931e-06	0.577199	0.164	0.076	0.138075	VPH
Lrrc4c	leucine rich repeat containing 4C [Source:MGI Symbol;Acc:MGI:2442636]	1.24457e-05	0.251942	0.633	0.496	0.292286	VPH
Kmt2c	lysine (K)-specific methyltransferase 2C [Source:MGI Symbol;Acc:MGI:2444959]	1.52261e-05	0.277604	0.289	0.189	0.357585	VPH
Id2	inhibitor of DNA binding 2 [Source:MGI Symbol;Acc:MGI:96397]	2.90029e-05	0.361668	0.395	0.274	0.681133	VPH
Nebl	nebulette [Source:MGI Symbol;Acc:MGI:1921353]	6.65544e-05	0.782224	0.354	0.238	1	VPH
Kcnn2	potassium intermediate/small conductance calcium-activated channel, subfamily N, member 2 [Source:MGI Symbol;Acc:MGI:2153182]	0.000127796	0.329084	0.334	0.229	1	VPH
Fbrsl1	fibrosin-like 1 [Source:MGI Symbol;Acc:MGI:1920907]	0.000156383	0.535333	0.19	0.106	1	VPH
Adgrl3	adhesion G protein-coupled receptor L3 [Source:MGI Symbol;Acc:MGI:2441950]	0.000183911	0.314487	0.666	0.546	1	VPH
Slc25a5	solute carrier family 25 (mitochondrial carrier, adenine nucleotide translocator), member 5 [Source:MGI Symbol;Acc:MGI:1353496]	0.000212451	0.367835	0.495	0.377	1	VPH
Rgs6	regulator of G-protein signaling 6 [Source:MGI Symbol;Acc:MGI:1354730]	0.000227839	0.251683	0.344	0.241	1	VPH
Psma2	proteasome subunit alpha 2 [Source:MGI Symbol;Acc:MGI:104885]	0.000240317	0.445832	0.17	0.094	1	VPH
Rgs7bp	regulator of G-protein signalling 7 binding protein [Source:MGI Symbol;Acc:MGI:106334]	0.000313202	0.347616	0.222	0.138	1	VPH
Itgav	integrin alpha V [Source:MGI Symbol;Acc:MGI:96608]	0.000460784	0.274322	0.196	0.125	1	VPH
Sdc2	syndecan 2 [Source:MGI Symbol;Acc:MGI:1349165]	0.000637398	0.308421	0.183	0.112	1	VPH
Cycs	cytochrome c, somatic [Source:MGI Symbol;Acc:MGI:88578]	0.000697582	0.35272	0.405	0.301	1	VPH
Phlpp1	PH domain and leucine rich repeat protein phosphatase 1 [Source:MGI Symbol;Acc:MGI:2138327]	0.00103652	0.256806	0.395	0.298	1	VPH
Ndufs4	NADH:ubiquinone oxidoreductase core subunit S4 [Source:MGI Symbol;Acc:MGI:1343135]	0.00109422	0.404226	0.225	0.143	1	VPH
Fabp5	fatty acid binding protein 5, epidermal [Source:MGI Symbol;Acc:MGI:101790]	0.00148289	0.367487	0.309	0.217	1	VPH
Stox2	storkhead box 2 [Source:MGI Symbol;Acc:MGI:1918319]	0.00166457	0.281697	0.408	0.309	1	VPH
Limch1	LIM and calponin homology domains 1 [Source:MGI Symbol;Acc:MGI:1924819]	0.00201119	0.285909	0.354	0.261	1	VPH
Plcb4	phospholipase C, beta 4 [Source:MGI Symbol;Acc:MGI:107464]	0.00242955	0.330221	0.232	0.158	1	VPH
Ctnna2	catenin (cadherin associated protein), alpha 2 [Source:MGI Symbol;Acc:MGI:88275]	0.00249004	0.366238	0.331	0.241	1	VPH
Acot13	acyl-CoA thioesterase 13 [Source:MGI Symbol;Acc:MGI:1914084]	0.00343916	0.430993	0.161	0.097	1	VPH
Grm5	glutamate receptor, metabotropic 5 [Source:MGI Symbol;Acc:MGI:1351342]	0.00410653	0.420064	0.251	0.174	1	VPH
Srsf5	serine and arginine-rich splicing factor 5 [Source:MGI Symbol;Acc:MGI:98287]	0.0042429	0.264372	0.219	0.152	1	VPH
Fndc5	fibronectin type III domain containing 5 [Source:MGI Symbol;Acc:MGI:1917614]	0.00426048	0.434251	0.174	0.109	1	VPH
Spon1	spondin 1, (f-spondin) extracellular matrix protein [Source:MGI Symbol;Acc:MGI:2385287]	0.00440468	0.376927	0.357	0.27	1	VPH
Srrm2	serine/arginine repetitive matrix 2 [Source:MGI Symbol;Acc:MGI:1923206]	0.00458667	0.324715	0.257	0.18	1	VPH
Igfbp2	insulin-like growth factor binding protein 2 [Source:MGI Symbol;Acc:MGI:96437]	0.00462282	0.422009	0.167	0.103	1	VPH
Fabp7	fatty acid binding protein 7, brain [Source:MGI Symbol;Acc:MGI:101916]	0.00479905	0.266072	0.543	0.448	1	VPH
Leng8	leukocyte receptor cluster (LRC) member 8 [Source:MGI Symbol;Acc:MGI:2142195]	0.00564323	0.365136	0.17	0.108	1	VPH
Chst10	carbohydrate sulfotransferase 10 [Source:MGI Symbol;Acc:MGI:2138283]	0.00577537	0.397256	0.215	0.148	1	VPH
Atp6v1e1	ATPase, H+ transporting, lysosomal V1 subunit E1 [Source:MGI Symbol;Acc:MGI:894326]	0.00590346	0.368454	0.154	0.098	1	VPH
Cyfip1	cytoplasmic FMR1 interacting protein 1 [Source:MGI Symbol;Acc:MGI:1338801]	0.00807296	0.43317	0.232	0.161	1	VPH
Cystm1	cysteine-rich transmembrane module containing 1 [Source:MGI Symbol;Acc:MGI:1913310]	0.00854638	0.284255	0.244	0.179	1	VPH

## Sheet: DEGs_Romanov2020
gene	description	p_val	avg_log2FC	pct.1	pct.2	p_val_adj	class
Lars2	leucyl-tRNA synthetase, mitochondrial [Source:MGI Symbol;Acc:MGI:2142973]	2.10199e-15	1.18785	0.242	0.034	4.62206e-11	ARC
Actn1	actinin, alpha 1 [Source:MGI Symbol;Acc:MGI:2137706]	5.97778e-15	1.01795	0.194	0.019	1.31445e-10	ARC
Eps15	epidermal growth factor receptor pathway substrate 15 [Source:MGI Symbol;Acc:MGI:104583]	1.36654e-05	0.608228	0.556	0.359	0.300488	ARC
Ltbp1	latent transforming growth factor beta binding protein 1 [Source:MGI Symbol;Acc:MGI:109151]	3.82545e-05	0.675552	0.177	0.058	0.841178	ARC
Kcnip4	Kv channel interacting protein 4 [Source:MGI Symbol;Acc:MGI:1933131]	5.99793e-05	0.687114	0.589	0.407	1	ARC
Kcnip4	Kv channel interacting protein 4 [Source:MGI Symbol;Acc:MGI:1933131]	0.000294766	0.409788	0.492	0.406	1	LHA
Kcnip4	Kv channel interacting protein 4 [Source:MGI Symbol;Acc:MGI:1933131]	0.00201003	0.351597	0.492	0.406	1	SCN
Lgi1	leucine-rich repeat LGI family, member 1 [Source:MGI Symbol;Acc:MGI:1861691]	6.60462e-05	0.424336	0.323	0.172	1	ARC
Lgi1	leucine-rich repeat LGI family, member 1 [Source:MGI Symbol;Acc:MGI:1861691]	1.05985e-10	0.538126	0.239	0.148	2.33051e-06	VMH
Itih3	inter-alpha trypsin inhibitor, heavy chain 3 [Source:MGI Symbol;Acc:MGI:96620]	0.000312888	0.66163	0.629	0.453	1	ARC
Itih3	inter-alpha trypsin inhibitor, heavy chain 3 [Source:MGI Symbol;Acc:MGI:96620]	4.94169e-75	1.28886	0.679	0.354	1.08663e-70	VMH
Slc7a11	solute carrier family 7 (cationic amino acid transporter, y+ system), member 11 [Source:MGI Symbol;Acc:MGI:1347355]	0.000641659	0.459927	0.645	0.486	1	ARC
Slc7a11	solute carrier family 7 (cationic amino acid transporter, y+ system), member 11 [Source:MGI Symbol;Acc:MGI:1347355]	0.000624887	0.340227	0.641	0.484	1	PVN
Slc7a11	solute carrier family 7 (cationic amino acid transporter, y+ system), member 11 [Source:MGI Symbol;Acc:MGI:1347355]	9.66973e-08	0.257535	0.499	0.489	0.00212628	VMH
Trpm3	transient receptor potential cation channel, subfamily M, member 3 [Source:MGI Symbol;Acc:MGI:2443101]	0.000939673	0.429329	0.927	0.878	1	ARC
Trpm3	transient receptor potential cation channel, subfamily M, member 3 [Source:MGI Symbol;Acc:MGI:2443101]	2.30794e-05	0.294104	0.925	0.875	0.507492	LHA
Gpm6a	glycoprotein m6a [Source:MGI Symbol;Acc:MGI:107671]	0.00118147	0.348712	0.815	0.74	1	ARC
Adk	adenosine kinase [Source:MGI Symbol;Acc:MGI:87930]	0.00132899	0.493289	0.476	0.366	1	ARC
Adk	adenosine kinase [Source:MGI Symbol;Acc:MGI:87930]	5.11383e-08	0.367161	0.418	0.347	0.00112448	VMH
Stx4a	syntaxin 4A (placental) [Source:MGI Symbol;Acc:MGI:893577]	0.00150989	0.579157	0.177	0.076	1	ARC
Peg3	paternally expressed 3 [Source:MGI Symbol;Acc:MGI:104748]	0.0015859	0.466699	0.25	0.129	1	ARC
Peg3	paternally expressed 3 [Source:MGI Symbol;Acc:MGI:104748]	0.0046184	0.344544	0.171	0.13	1	SCN
Peg3	paternally expressed 3 [Source:MGI Symbol;Acc:MGI:104748]	8.24963e-06	0.358585	0.173	0.115	0.181401	VMH
Msi2	musashi RNA-binding protein 2 [Source:MGI Symbol;Acc:MGI:1923876]	0.00162079	0.323686	0.895	0.779	1	ARC
Sirpa	signal-regulatory protein alpha [Source:MGI Symbol;Acc:MGI:108563]	0.0018317	0.459884	0.331	0.193	1	ARC
Gria1	glutamate receptor, ionotropic, AMPA1 (alpha 1) [Source:MGI Symbol;Acc:MGI:95808]	0.00217466	0.554695	0.669	0.534	1	ARC
Gria1	glutamate receptor, ionotropic, AMPA1 (alpha 1) [Source:MGI Symbol;Acc:MGI:95808]	3.59653e-12	0.431759	0.601	0.51	7.9084e-08	VMH
Pde7b	phosphodiesterase 7B [Source:MGI Symbol;Acc:MGI:1352752]	0.00250022	0.530297	0.524	0.414	1	ARC
Mapre3	microtubule-associated protein, RP/EB family, member 3 [Source:MGI Symbol;Acc:MGI:2140967]	0.00261337	0.407758	0.161	0.072	1	ARC
Ckb	creatine kinase, brain [Source:MGI Symbol;Acc:MGI:88407]	0.00264169	0.337206	0.871	0.848	1	ARC
Wdr20	WD repeat domain 20 [Source:MGI Symbol;Acc:MGI:1916891]	0.00328088	0.325002	0.153	0.071	1	ARC
Kcnq3	potassium voltage-gated channel, subfamily Q, member 3 [Source:MGI Symbol;Acc:MGI:1336181]	0.00423166	0.629783	0.419	0.297	1	ARC
Hacd3	3-hydroxyacyl-CoA dehydratase 3 [Source:MGI Symbol;Acc:MGI:1889341]	0.00476588	0.384665	0.46	0.318	1	ARC
Mdga2	MAM domain containing glycosylphosphatidylinositol anchor 2 [Source:MGI Symbol;Acc:MGI:2444706]	0.00482675	0.281043	0.968	0.929	1	ARC
Lncpint	long non-protein coding RNA, Trp53 induced transcript [Source:MGI Symbol;Acc:MGI:2673128]	0.00608594	0.429856	0.153	0.07	1	ARC
Agt	angiotensinogen (serpin peptidase inhibitor, clade A, member 8) [Source:MGI Symbol;Acc:MGI:87963]	0.0062221	0.313748	0.911	0.899	1	ARC
Agt	angiotensinogen (serpin peptidase inhibitor, clade A, member 8) [Source:MGI Symbol;Acc:MGI:87963]	0.00624792	0.273097	0.979	0.897	1	MnPO
Agt	angiotensinogen (serpin peptidase inhibitor, clade A, member 8) [Source:MGI Symbol;Acc:MGI:87963]	1.76188e-53	0.702027	0.953	0.873	3.87419e-49	VMH
Slit2	slit guidance ligand 2 [Source:MGI Symbol;Acc:MGI:1315205]	0.00635786	0.529172	0.371	0.243	1	ARC
Slit2	slit guidance ligand 2 [Source:MGI Symbol;Acc:MGI:1315205]	5.14194e-06	0.538431	0.382	0.236	0.113066	VPH
Akap7	A kinase (PRKA) anchor protein 7 [Source:MGI Symbol;Acc:MGI:1859150]	0.00637448	0.551949	0.21	0.109	1	ARC
Slc12a6	solute carrier family 12, member 6 [Source:MGI Symbol;Acc:MGI:2135960]	0.00652059	0.537091	0.177	0.099	1	ARC
Psip1	PC4 and SFRS1 interacting protein 1 [Source:MGI Symbol;Acc:MGI:2142116]	0.00654428	0.441132	0.194	0.097	1	ARC
Arl6ip5	ADP-ribosylation factor-like 6 interacting protein 5 [Source:MGI Symbol;Acc:MGI:1929501]	0.00661197	0.529472	0.169	0.084	1	ARC
Lrrc8a	leucine rich repeat containing 8A VRAC subunit A [Source:MGI Symbol;Acc:MGI:2652847]	0.00670235	0.533646	0.258	0.148	1	ARC
Slc1a2	solute carrier family 1 (glial high affinity glutamate transporter), member 2 [Source:MGI Symbol;Acc:MGI:101931]	0.00678026	0.322387	0.968	0.91	1	ARC
Slc1a2	solute carrier family 1 (glial high affinity glutamate transporter), member 2 [Source:MGI Symbol;Acc:MGI:101931]	7.09153e-12	0.29595	0.92	0.909	1.55936e-07	VMH
Zzz3	zinc finger, ZZ domain containing 3 [Source:MGI Symbol;Acc:MGI:1920453]	0.00773823	0.510806	0.194	0.098	1	ARC
Mmd2	monocyte to macrophage differentiation-associated 2 [Source:MGI Symbol;Acc:MGI:1922354]	0.00788234	0.355095	0.75	0.665	1	ARC
Prex2	phosphatidylinositol-3,4,5-trisphosphate-dependent Rac exchange factor 2 [Source:MGI Symbol;Acc:MGI:1923385]	0.00798234	0.449075	0.452	0.316	1	ARC
Prex2	phosphatidylinositol-3,4,5-trisphosphate-dependent Rac exchange factor 2 [Source:MGI Symbol;Acc:MGI:1923385]	7.07333e-15	0.573722	0.394	0.287	1.55535e-10	VMH
Snrnp70	small nuclear ribonucleoprotein 70 (U1) [Source:MGI Symbol;Acc:MGI:98341]	0.00829887	0.378906	0.532	0.393	1	ARC
Snrnp70	small nuclear ribonucleoprotein 70 (U1) [Source:MGI Symbol;Acc:MGI:98341]	3.29366e-07	0.318499	0.441	0.378	0.00724243	VMH
Sparc	secreted acidic cysteine rich glycoprotein [Source:MGI Symbol;Acc:MGI:98373]	0.00834215	0.378036	0.702	0.7	1	ARC
Sparc	secreted acidic cysteine rich glycoprotein [Source:MGI Symbol;Acc:MGI:98373]	1.34085e-11	0.376671	0.736	0.683	2.94839e-07	VMH
Tmc7	transmembrane channel-like gene family 7 [Source:MGI Symbol;Acc:MGI:2443317]	0.00938315	0.361337	0.234	0.213	1	ARC
Fam107a	family with sequence similarity 107, member A [Source:MGI Symbol;Acc:MGI:3041256]	0.00939395	0.368865	0.194	0.105	1	ARC
Shisa6	shisa family member 6 [Source:MGI Symbol;Acc:MGI:2685725]	8.09731e-19	1.06444	0.287	0.101	1.78052e-14	LHA
Aff3	AF4/FMR2 family, member 3 [Source:MGI Symbol;Acc:MGI:106927]	6.34318e-13	0.706523	0.417	0.216	1.3948e-08	LHA
Dcc	deleted in colorectal carcinoma [Source:MGI Symbol;Acc:MGI:94869]	3.2366e-10	0.598764	0.277	0.13	7.11695e-06	LHA
Dcc	deleted in colorectal carcinoma [Source:MGI Symbol;Acc:MGI:94869]	6.17172e-74	2.18556	0.583	0.105	1.3571e-69	VPH
Myorg	myogenesis regulating glycosidase (putative) [Source:MGI Symbol;Acc:MGI:2140300]	1.13382e-08	0.593713	0.358	0.205	0.000249316	LHA
Myorg	myogenesis regulating glycosidase (putative) [Source:MGI Symbol;Acc:MGI:2140300]	0.00298176	0.399783	0.28	0.216	1	VPH
Lnpep	leucyl/cystinyl aminopeptidase [Source:MGI Symbol;Acc:MGI:2387123]	2.71193e-05	0.477306	0.28	0.171	0.596325	LHA
Hes5	hes family bHLH transcription factor 5 [Source:MGI Symbol;Acc:MGI:104876]	0.000201082	0.307326	0.541	0.417	1	LHA
Hes5	hes family bHLH transcription factor 5 [Source:MGI Symbol;Acc:MGI:104876]	0.000471094	0.276196	0.489	0.409	1	POA
Ttc3	tetratricopeptide repeat domain 3 [Source:MGI Symbol;Acc:MGI:1276539]	0.00029365	0.386023	0.365	0.256	1	LHA
Arpp21	cyclic AMP-regulated phosphoprotein, 21 [Source:MGI Symbol;Acc:MGI:107562]	0.000730373	0.392337	0.205	0.124	1	LHA
Arpp21	cyclic AMP-regulated phosphoprotein, 21 [Source:MGI Symbol;Acc:MGI:107562]	1.1645e-05	0.67265	0.269	0.124	0.256062	PVN
Gfap	glial fibrillary acidic protein [Source:MGI Symbol;Acc:MGI:95697]	0.000781933	0.784162	0.117	0.162	1	LHA
Gfap	glial fibrillary acidic protein [Source:MGI Symbol;Acc:MGI:95697]	7.75137e-12	1.08493	0.293	0.141	1.70445e-07	SCN
Ctdspl	CTD (carboxy-terminal domain, RNA polymerase II, polypeptide A) small phosphatase-like [Source:MGI Symbol;Acc:MGI:1916524]	0.000918022	0.432177	0.186	0.123	1	LHA
Prkg1	protein kinase, cGMP-dependent, type I [Source:MGI Symbol;Acc:MGI:108174]	0.00167655	0.320772	0.182	0.17	1	LHA
Prkg1	protein kinase, cGMP-dependent, type I [Source:MGI Symbol;Acc:MGI:108174]	2.28613e-08	0.451441	0.241	0.146	0.000502698	POA
Pcdh11x	protocadherin 11 X-linked [Source:MGI Symbol;Acc:MGI:2442849]	0.00244716	0.378024	0.42	0.34	1	LHA
Ptchd4	patched domain containing 4 [Source:MGI Symbol;Acc:MGI:1920485]	0.00248649	0.467641	0.248	0.17	1	LHA
Ptchd4	patched domain containing 4 [Source:MGI Symbol;Acc:MGI:1920485]	0.00018901	0.288365	0.226	0.161	1	POA
Camk2n1	calcium/calmodulin-dependent protein kinase II inhibitor 1 [Source:MGI Symbol;Acc:MGI:1913509]	0.00325468	0.393817	0.212	0.137	1	LHA
Dennd6a	DENN/MADD domain containing 6A [Source:MGI Symbol;Acc:MGI:2442980]	0.00340735	0.402126	0.189	0.127	1	LHA
2610316D01Rik	RIKEN cDNA 2610316D01 gene [Source:MGI Symbol;Acc:MGI:1919761]	0.00412798	0.385894	0.176	0.115	1	LHA
Dpf3	double PHD fingers 3 [Source:MGI Symbol;Acc:MGI:1917377]	0.00498003	0.346584	0.257	0.205	1	LHA
Klc1	kinesin light chain 1 [Source:MGI Symbol;Acc:MGI:107978]	0.00549194	0.315696	0.16	0.097	1	LHA
Immp1l	IMP1 inner mitochondrial membrane peptidase-like (S. cerevisiae) [Source:MGI Symbol;Acc:MGI:1913791]	0.00557258	0.311127	0.182	0.137	1	LHA
Mt1	metallothionein 1 [Source:MGI Symbol;Acc:MGI:97171]	9.05505e-06	0.569012	0.895	0.805	0.199112	MnPO
Mt1	metallothionein 1 [Source:MGI Symbol;Acc:MGI:97171]	9.64235e-12	0.497666	0.872	0.8	2.12026e-07	SCN
Mt3	metallothionein 3 [Source:MGI Symbol;Acc:MGI:97173]	1.70412e-05	0.461671	0.874	0.673	0.374719	MnPO
Mt3	metallothionein 3 [Source:MGI Symbol;Acc:MGI:97173]	0.000125804	0.293075	0.735	0.673	1	SCN
Lta4h	leukotriene A4 hydrolase [Source:MGI Symbol;Acc:MGI:96836]	7.07155e-05	0.681251	0.168	0.045	1	MnPO
Itgb3bp	integrin beta 3 binding protein (beta3-endonexin) [Source:MGI Symbol;Acc:MGI:1914983]	0.000576245	0.72847	0.168	0.055	1	MnPO
Ndufa3	NADH:ubiquinone oxidoreductase subunit A3 [Source:MGI Symbol;Acc:MGI:1913341]	0.00144313	0.638433	0.337	0.182	1	MnPO
Pclo	piccolo (presynaptic cytomatrix protein) [Source:MGI Symbol;Acc:MGI:1349390]	0.00199559	0.273754	0.389	0.245	1	MnPO
Ier2	immediate early response 2 [Source:MGI Symbol;Acc:MGI:104815]	0.00213693	0.729972	0.4	0.237	1	MnPO
Ier2	immediate early response 2 [Source:MGI Symbol;Acc:MGI:104815]	1.64456e-23	0.750834	0.38	0.193	3.61623e-19	POA
Ier2	immediate early response 2 [Source:MGI Symbol;Acc:MGI:104815]	1.87523e-06	0.87382	0.404	0.233	0.0412345	PVN
Ier2	immediate early response 2 [Source:MGI Symbol;Acc:MGI:104815]	4.16827e-19	1.0325	0.458	0.216	9.16561e-15	SCN
Tmem164	transmembrane protein 164 [Source:MGI Symbol;Acc:MGI:2148020]	0.00302976	0.471111	0.547	0.374	1	MnPO
Tmem164	transmembrane protein 164 [Source:MGI Symbol;Acc:MGI:2148020]	0.000257024	0.265284	0.413	0.363	1	VMH
Itsn2	intersectin 2 [Source:MGI Symbol;Acc:MGI:1338049]	0.00406785	0.518441	0.295	0.157	1	MnPO
Oxr1	oxidation resistance 1 [Source:MGI Symbol;Acc:MGI:2179326]	0.00520572	0.260958	0.316	0.203	1	MnPO
Oxr1	oxidation resistance 1 [Source:MGI Symbol;Acc:MGI:2179326]	0.000499803	0.284053	0.255	0.189	1	POA
Ddhd1	DDHD domain containing 1 [Source:MGI Symbol;Acc:MGI:2150302]	0.0060919	0.371697	0.663	0.653	1	MnPO
Tcf12	transcription factor 12 [Source:MGI Symbol;Acc:MGI:101877]	0.00708678	0.322536	0.516	0.533	1	MnPO
Ube2r2	ubiquitin-conjugating enzyme E2R 2 [Source:MGI Symbol;Acc:MGI:1914865]	0.0095991	0.511496	0.232	0.117	1	MnPO
Zfr	zinc finger RNA binding protein [Source:MGI Symbol;Acc:MGI:1341890]	0.00969197	0.550051	0.305	0.22	1	MnPO
Ptprz1	protein tyrosine phosphatase, receptor type Z, polypeptide 1 [Source:MGI Symbol;Acc:MGI:97816]	7.26803e-49	0.587476	0.986	0.944	1.59817e-44	POA
Ptprz1	protein tyrosine phosphatase, receptor type Z, polypeptide 1 [Source:MGI Symbol;Acc:MGI:97816]	2.10676e-08	0.36295	0.988	0.952	0.000463256	VPH
Nrxn1	neurexin I [Source:MGI Symbol;Acc:MGI:1096391]	9.66386e-36	0.36768	1	0.996	2.12499e-31	POA
Nrxn1	neurexin I [Source:MGI Symbol;Acc:MGI:1096391]	8.51607e-08	0.262422	1	0.996	0.0018726	VPH
Npas3	neuronal PAS domain protein 3 [Source:MGI Symbol;Acc:MGI:1351610]	1.38558e-34	0.377452	0.999	0.989	3.04676e-30	POA
Malat1	metastasis associated lung adenocarcinoma transcript 1 (non-coding RNA) [Source:MGI Symbol;Acc:MGI:1919539]	8.8567e-34	0.263281	1	1	1.9475e-29	POA
Csmd1	CUB and Sushi multiple domains 1 [Source:MGI Symbol;Acc:MGI:2137383]	1.66587e-33	0.596241	0.847	0.666	3.66309e-29	POA
Csmd1	CUB and Sushi multiple domains 1 [Source:MGI Symbol;Acc:MGI:2137383]	3.8851e-05	0.31082	0.791	0.706	0.854294	VPH
Grm5	glutamate receptor, metabotropic 5 [Source:MGI Symbol;Acc:MGI:1351342]	6.48618e-31	0.734949	0.677	0.449	1.42625e-26	POA
Grm5	glutamate receptor, metabotropic 5 [Source:MGI Symbol;Acc:MGI:1351342]	1.31825e-06	0.427105	0.661	0.494	0.0289869	VPH
Grm3	glutamate receptor, metabotropic 3 [Source:MGI Symbol;Acc:MGI:1351340]	8.10091e-28	0.522824	0.861	0.727	1.78131e-23	POA
Nrxn3	neurexin III [Source:MGI Symbol;Acc:MGI:1096389]	2.8625e-26	0.506642	0.923	0.844	6.29435e-22	POA
Kcnd2	potassium voltage-gated channel, Shal-related family, member 2 [Source:MGI Symbol;Acc:MGI:102663]	3.14687e-24	0.347843	0.989	0.969	6.91964e-20	POA
Fos	FBJ osteosarcoma oncogene [Source:MGI Symbol;Acc:MGI:95574]	1.23336e-21	0.432274	0.51	0.318	2.71203e-17	POA
Fos	FBJ osteosarcoma oncogene [Source:MGI Symbol;Acc:MGI:95574]	3.09304e-07	0.813039	0.513	0.36	0.00680129	PVN
Fos	FBJ osteosarcoma oncogene [Source:MGI Symbol;Acc:MGI:95574]	1.50702e-39	1.26728	0.676	0.331	3.31378e-35	SCN
Igfbp2	insulin-like growth factor binding protein 2 [Source:MGI Symbol;Acc:MGI:96437]	4.67475e-21	0.513385	0.442	0.258	1.02793e-16	POA
Igfbp2	insulin-like growth factor binding protein 2 [Source:MGI Symbol;Acc:MGI:96437]	1.99248e-07	0.700966	0.441	0.293	0.00438126	VPH
Fabp7	fatty acid binding protein 7, brain [Source:MGI Symbol;Acc:MGI:101916]	1.4536e-19	0.398127	0.765	0.587	3.19632e-15	POA
Fabp7	fatty acid binding protein 7, brain [Source:MGI Symbol;Acc:MGI:101916]	7.25055e-17	0.628086	0.807	0.613	1.59432e-12	SCN
Fabp7	fatty acid binding protein 7, brain [Source:MGI Symbol;Acc:MGI:101916]	0.00123022	0.254211	0.728	0.625	1	VPH
Grip1	glutamate receptor interacting protein 1 [Source:MGI Symbol;Acc:MGI:1921303]	7.01049e-18	0.555805	0.63	0.464	1.54154e-13	POA
Grip1	glutamate receptor interacting protein 1 [Source:MGI Symbol;Acc:MGI:1921303]	0.000333969	0.389904	0.587	0.5	1	VPH
Erbb4	erb-b2 receptor tyrosine kinase 4 [Source:MGI Symbol;Acc:MGI:104771]	1.12376e-16	0.304201	0.957	0.918	2.47103e-12	POA
Trim9	tripartite motif-containing 9 [Source:MGI Symbol;Acc:MGI:2137354]	1.23257e-16	0.369065	0.864	0.771	2.71031e-12	POA
Lrp1b	low density lipoprotein-related protein 1B [Source:MGI Symbol;Acc:MGI:2151136]	1.31897e-16	0.300712	0.963	0.908	2.90029e-12	POA
Lrp1b	low density lipoprotein-related protein 1B [Source:MGI Symbol;Acc:MGI:2151136]	0.000972805	0.277079	0.961	0.919	1	VPH
Egr1	early growth response 1 [Source:MGI Symbol;Acc:MGI:95295]	2.87759e-16	0.497934	0.37	0.216	6.32753e-12	POA
Egr1	early growth response 1 [Source:MGI Symbol;Acc:MGI:95295]	0.000154764	0.61645	0.391	0.249	1	PVN
Egr1	early growth response 1 [Source:MGI Symbol;Acc:MGI:95295]	2.48299e-24	1.12716	0.477	0.23	5.45986e-20	SCN
Pcdh9	protocadherin 9 [Source:MGI Symbol;Acc:MGI:1306801]	4.48658e-15	0.280791	0.982	0.966	9.86554e-11	POA
Nlgn1	neuroligin 1 [Source:MGI Symbol;Acc:MGI:2179435]	4.97681e-14	0.287175	0.957	0.91	1.09435e-09	POA
Sema6d	sema domain, transmembrane domain (TM), and cytoplasmic domain, (semaphorin) 6D [Source:MGI Symbol;Acc:MGI:2387661]	1.00145e-13	0.428931	0.765	0.671	2.20209e-09	POA
Pde4b	phosphodiesterase 4B, cAMP specific [Source:MGI Symbol;Acc:MGI:99557]	1.33719e-12	0.299523	0.769	0.631	2.94035e-08	POA
Pcdh7	protocadherin 7 [Source:MGI Symbol;Acc:MGI:1860487]	2.16626e-12	0.302114	0.896	0.813	4.76338e-08	POA
Junb	jun B proto-oncogene [Source:MGI Symbol;Acc:MGI:96647]	2.19176e-12	0.434983	0.332	0.204	4.81946e-08	POA
Junb	jun B proto-oncogene [Source:MGI Symbol;Acc:MGI:96647]	0.00162891	0.721367	0.34	0.231	1	PVN
Junb	jun B proto-oncogene [Source:MGI Symbol;Acc:MGI:96647]	4.99745e-14	0.912783	0.402	0.218	1.09889e-09	SCN
Cdh13	cadherin 13 [Source:MGI Symbol;Acc:MGI:99551]	4.99691e-12	0.529831	0.365	0.233	1.09877e-07	POA
Ptprt	protein tyrosine phosphatase, receptor type, T [Source:MGI Symbol;Acc:MGI:1321152]	5.74385e-12	0.356732	0.785	0.676	1.26302e-07	POA
Grid2	glutamate receptor, ionotropic, delta 2 [Source:MGI Symbol;Acc:MGI:95813]	8.30559e-12	0.296932	0.902	0.832	1.82632e-07	POA
Ptn	pleiotrophin [Source:MGI Symbol;Acc:MGI:97804]	1.67095e-11	0.265048	0.884	0.787	3.67426e-07	POA
Ptn	pleiotrophin [Source:MGI Symbol;Acc:MGI:97804]	8.18739e-06	0.349826	0.902	0.804	0.180032	VPH
Fgf14	fibroblast growth factor 14 [Source:MGI Symbol;Acc:MGI:109189]	1.10095e-10	0.275188	0.891	0.829	2.42087e-06	POA
Gria2	glutamate receptor, ionotropic, AMPA2 (alpha 2) [Source:MGI Symbol;Acc:MGI:95809]	1.39239e-10	0.353443	0.677	0.544	3.06173e-06	POA
Pard3b	par-3 family cell polarity regulator beta [Source:MGI Symbol;Acc:MGI:1919301]	1.58239e-10	0.336327	0.729	0.609	3.47951e-06	POA
Zfpm2	zinc finger protein, multitype 2 [Source:MGI Symbol;Acc:MGI:1334444]	2.14333e-10	0.368125	0.721	0.62	4.71296e-06	POA
Hs6st3	heparan sulfate 6-O-sulfotransferase 3 [Source:MGI Symbol;Acc:MGI:1354960]	2.19487e-10	0.493935	0.312	0.194	4.82629e-06	POA
Nhsl1	NHS-like 1 [Source:MGI Symbol;Acc:MGI:106390]	2.52261e-10	0.3545	0.741	0.635	5.54696e-06	POA
Celf2	CUGBP, Elav-like family member 2 [Source:MGI Symbol;Acc:MGI:1338822]	4.84924e-10	0.306801	0.782	0.696	1.0663e-05	POA
Macrod2	mono-ADP ribosylhydrolase 2 [Source:MGI Symbol;Acc:MGI:1920149]	8.00171e-10	0.377624	0.639	0.521	1.7595e-05	POA
Nckap5	NCK-associated protein 5 [Source:MGI Symbol;Acc:MGI:2686394]	1.42863e-09	0.322079	0.75	0.648	3.14141e-05	POA
Ext1	exostosin glycosyltransferase 1 [Source:MGI Symbol;Acc:MGI:894663]	4.86943e-09	0.384697	0.521	0.397	0.000107074	POA
Sez6l	seizure related 6 homolog like [Source:MGI Symbol;Acc:MGI:1935121]	6.48057e-09	0.443996	0.385	0.271	0.000142501	POA
Kirrel3	kirre like nephrin family adhesion molecule 3 [Source:MGI Symbol;Acc:MGI:1914953]	8.5065e-09	0.297961	0.758	0.653	0.000187049	POA
Csmd2	CUB and Sushi multiple domains 2 [Source:MGI Symbol;Acc:MGI:2386401]	2.98493e-08	0.366126	0.38	0.268	0.000656356	POA
Dok6	docking protein 6 [Source:MGI Symbol;Acc:MGI:3639495]	4.00902e-08	0.471038	0.399	0.292	0.000881544	POA
Dok6	docking protein 6 [Source:MGI Symbol;Acc:MGI:3639495]	0.00486162	0.29791	0.402	0.311	1	SCN
Gulp1	GULP, engulfment adaptor PTB domain containing 1 [Source:MGI Symbol;Acc:MGI:1920407]	4.94542e-08	0.300112	0.367	0.263	0.00108745	POA
Maml2	mastermind like transcriptional coactivator 2 [Source:MGI Symbol;Acc:MGI:2389460]	6.80509e-08	0.283298	0.804	0.736	0.00149637	POA
Dip2c	disco interacting protein 2 homolog C [Source:MGI Symbol;Acc:MGI:1920179]	7.18699e-08	0.387641	0.427	0.314	0.00158035	POA
Gm33680	predicted gene, 33680 [Source:MGI Symbol;Acc:MGI:5592839]	1.63847e-07	0.286146	0.375	0.273	0.00360284	POA
Gas7	growth arrest specific 7 [Source:MGI Symbol;Acc:MGI:1202388]	2.04689e-07	0.366861	0.198	0.118	0.0045009	POA
Rgs7	regulator of G protein signaling 7 [Source:MGI Symbol;Acc:MGI:1346089]	2.18639e-07	0.312426	0.614	0.502	0.00480765	POA
Rgs7	regulator of G protein signaling 7 [Source:MGI Symbol;Acc:MGI:1346089]	0.00167116	0.305346	0.587	0.526	1	VPH
Tnfaip8	tumor necrosis factor, alpha-induced protein 8 [Source:MGI Symbol;Acc:MGI:2147191]	2.19779e-07	0.309905	0.328	0.231	0.00483271	POA
Dock10	dedicator of cytokinesis 10 [Source:MGI Symbol;Acc:MGI:2146320]	2.48027e-07	0.353721	0.347	0.244	0.00545387	POA
Grid1	glutamate receptor, ionotropic, delta 1 [Source:MGI Symbol;Acc:MGI:95812]	7.42788e-07	0.335665	0.547	0.44	0.0163332	POA
Il17rd	interleukin 17 receptor D [Source:MGI Symbol;Acc:MGI:2159727]	9.70471e-07	0.335367	0.205	0.127	0.0213397	POA
Tspan5	tetraspanin 5 [Source:MGI Symbol;Acc:MGI:1928096]	1.02872e-06	0.304784	0.611	0.511	0.0226206	POA
Tspan5	tetraspanin 5 [Source:MGI Symbol;Acc:MGI:1928096]	0.00242972	0.334059	0.634	0.528	1	VPH
Tmem178b	transmembrane protein 178B [Source:MGI Symbol;Acc:MGI:3647581]	1.46387e-06	0.378237	0.352	0.255	0.032189	POA
Sema6a	sema domain, transmembrane domain (TM), and cytoplasmic domain, (semaphorin) 6A [Source:MGI Symbol;Acc:MGI:1203727]	2.13249e-06	0.421112	0.282	0.2	0.0468913	POA
Csmd3	CUB and Sushi multiple domains 3 [Source:MGI Symbol;Acc:MGI:2386403]	2.58938e-06	0.349255	0.497	0.416	0.0569379	POA
Pag1	phosphoprotein associated with glycosphingolipid microdomains 1 [Source:MGI Symbol;Acc:MGI:2443160]	2.91085e-06	0.272522	0.268	0.187	0.0640068	POA
Pik3r3	phosphoinositide-3-kinase regulatory subunit 3 [Source:MGI Symbol;Acc:MGI:109277]	3.00355e-06	0.298074	0.212	0.14	0.0660451	POA
Cdh10	cadherin 10 [Source:MGI Symbol;Acc:MGI:107436]	3.36588e-06	0.265788	0.691	0.609	0.0740123	POA
Phlpp1	PH domain and leucine rich repeat protein phosphatase 1 [Source:MGI Symbol;Acc:MGI:2138327]	7.94303e-06	0.251188	0.716	0.633	0.174659	POA
Negr1	neuronal growth regulator 1 [Source:MGI Symbol;Acc:MGI:2444846]	7.99603e-06	0.2917	0.694	0.63	0.175825	POA
Nav3	neuron navigator 3 [Source:MGI Symbol;Acc:MGI:2183703]	9.83675e-06	0.300208	0.41	0.316	0.2163	POA
Alcam	activated leukocyte cell adhesion molecule [Source:MGI Symbol;Acc:MGI:1313266]	1.25184e-05	0.276659	0.652	0.568	0.275267	POA
Egfr	epidermal growth factor receptor [Source:MGI Symbol;Acc:MGI:95294]	1.25212e-05	0.299005	0.472	0.376	0.275329	POA
Ptprj	protein tyrosine phosphatase, receptor type, J [Source:MGI Symbol;Acc:MGI:104574]	1.39375e-05	0.375437	0.354	0.264	0.306471	POA
Ptprj	protein tyrosine phosphatase, receptor type, J [Source:MGI Symbol;Acc:MGI:104574]	0.0011674	0.326719	0.39	0.278	1	VPH
C030005K06Rik	RIKEN cDNA C030005K06 gene [Source:MGI Symbol;Acc:MGI:1925945]	1.52336e-05	0.373263	0.27	0.19	0.334971	POA
Ppp1r12a	protein phosphatase 1, regulatory subunit 12A [Source:MGI Symbol;Acc:MGI:1309528]	1.52742e-05	0.279929	0.394	0.303	0.335865	POA
Specc1	sperm antigen with calponin homology and coiled-coil domains 1 [Source:MGI Symbol;Acc:MGI:2442356]	1.83873e-05	0.320451	0.394	0.303	0.404318	POA
Rgs7bp	regulator of G-protein signalling 7 binding protein [Source:MGI Symbol;Acc:MGI:106334]	2.54109e-05	0.315582	0.297	0.215	0.558761	POA
Kcnd3	potassium voltage-gated channel, Shal-related family, member 3 [Source:MGI Symbol;Acc:MGI:1928743]	3.05288e-05	0.358529	0.182	0.116	0.671299	POA
Msmo1	methylsterol monoxygenase 1 [Source:MGI Symbol;Acc:MGI:1913484]	3.18871e-05	0.290359	0.471	0.379	0.701166	POA
Chl1	cell adhesion molecule L1-like [Source:MGI Symbol;Acc:MGI:1098266]	4.01695e-05	0.300864	0.424	0.335	0.883288	POA
Gmds	GDP-mannose 4, 6-dehydratase [Source:MGI Symbol;Acc:MGI:1891112]	4.26451e-05	0.304862	0.162	0.102	0.937724	POA
Fbxl17	F-box and leucine-rich repeat protein 17 [Source:MGI Symbol;Acc:MGI:1354704]	4.71296e-05	0.252397	0.427	0.338	1	POA
Kcnma1	potassium large conductance calcium-activated channel, subfamily M, alpha member 1 [Source:MGI Symbol;Acc:MGI:99923]	5.6388e-05	0.27269	0.571	0.48	1	POA
Tanc2	tetratricopeptide repeat, ankyrin repeat and coiled-coil containing 2 [Source:MGI Symbol;Acc:MGI:2444121]	6.28688e-05	0.259671	0.357	0.275	1	POA
9630014M24Rik	RIKEN cDNA 9630014M24 gene [Source:MGI Symbol;Acc:MGI:3588234]	6.36679e-05	0.270184	0.152	0.096	1	POA
AY036118	cDNA sequence AY036118 [Source:MGI Symbol;Acc:MGI:2158419]	6.63843e-05	0.367846	0.152	0.094	1	POA
AY036118	cDNA sequence AY036118 [Source:MGI Symbol;Acc:MGI:2158419]	7.76567e-11	0.861722	0.252	0.096	1.70759e-06	VPH
Magi1	membrane associated guanylate kinase, WW and PDZ domain containing 1 [Source:MGI Symbol;Acc:MGI:1203522]	0.000132218	0.254858	0.63	0.558	1	POA
Rnf180	ring finger protein 180 [Source:MGI Symbol;Acc:MGI:1919066]	0.000135531	0.325906	0.298	0.224	1	POA
Sgcd	sarcoglycan, delta (dystrophin-associated glycoprotein) [Source:MGI Symbol;Acc:MGI:1346525]	0.000220829	0.324446	0.383	0.304	1	POA
Rab8b	RAB8B, member RAS oncogene family [Source:MGI Symbol;Acc:MGI:2442982]	0.00026349	0.280665	0.213	0.15	1	POA
Nktr	natural killer tumor recognition sequence [Source:MGI Symbol;Acc:MGI:97346]	0.000313514	0.254122	0.326	0.252	1	POA
A230057D06Rik	RIKEN cDNA A230057D06 gene [Source:MGI Symbol;Acc:MGI:2442922]	0.000316549	0.2716	0.37	0.292	1	POA
Naaladl2	N-acetylated alpha-linked acidic dipeptidase-like 2 [Source:MGI Symbol;Acc:MGI:2685867]	0.000327414	0.295258	0.447	0.369	1	POA
Sarnp	SAP domain containing ribonucleoprotein [Source:MGI Symbol;Acc:MGI:1913368]	0.000412611	0.268403	0.168	0.113	1	POA
Dclk2	doublecortin-like kinase 2 [Source:MGI Symbol;Acc:MGI:1918012]	0.000442713	0.282172	0.414	0.337	1	POA
Kalrn	kalirin, RhoGEF kinase [Source:MGI Symbol;Acc:MGI:2685385]	0.00044984	0.250446	0.367	0.292	1	POA
L3mbtl3	L3MBTL3 histone methyl-lysine binding protein [Source:MGI Symbol;Acc:MGI:2143628]	0.000544225	0.252072	0.211	0.152	1	POA
Pde1c	phosphodiesterase 1C [Source:MGI Symbol;Acc:MGI:108413]	0.000576843	0.288336	0.225	0.163	1	POA
Cnot4	CCR4-NOT transcription complex, subunit 4 [Source:MGI Symbol;Acc:MGI:1859026]	0.0008696	0.27236	0.285	0.219	1	POA
Fars2	phenylalanine-tRNA synthetase 2 (mitochondrial) [Source:MGI Symbol;Acc:MGI:1917205]	0.000913018	0.267312	0.348	0.277	1	POA
Cpeb4	cytoplasmic polyadenylation element binding protein 4 [Source:MGI Symbol;Acc:MGI:1914829]	0.000956856	0.278817	0.391	0.32	1	POA
Akt3	thymoma viral proto-oncogene 3 [Source:MGI Symbol;Acc:MGI:1345147]	0.00100551	0.271691	0.418	0.345	1	POA
Cwc27	CWC27 spliceosome-associated protein [Source:MGI Symbol;Acc:MGI:1914535]	0.00102983	0.266984	0.173	0.12	1	POA
Scfd2	Sec1 family domain containing 2 [Source:MGI Symbol;Acc:MGI:2443446]	0.00143964	0.299225	0.297	0.238	1	POA
Fgf12	fibroblast growth factor 12 [Source:MGI Symbol;Acc:MGI:109183]	0.00193248	0.262675	0.439	0.368	1	POA
Sema5b	sema domain, seven thrombospondin repeats (type 1 and type 1-like), transmembrane domain (TM) and short cytoplasmic domain, (semaphorin) 5B [Source:MGI Symbol;Acc:MGI:107555]	0.00203403	0.269796	0.194	0.141	1	POA
Rbms3	RNA binding motif, single stranded interacting protein [Source:MGI Symbol;Acc:MGI:2444477]	0.00735829	0.274415	0.162	0.117	1	POA
Nkain2	Na+/K+ transporting ATPase interacting 2 [Source:MGI Symbol;Acc:MGI:1923447]	7.62012e-16	1.54421	0.333	0.1	1.67559e-11	PVN
Nkain2	Na+/K+ transporting ATPase interacting 2 [Source:MGI Symbol;Acc:MGI:1923447]	0.000129398	0.565869	0.197	0.104	1	VPH
Nnat	neuronatin [Source:MGI Symbol;Acc:MGI:104716]	1.08015e-12	0.815425	0.84	0.589	2.37514e-08	PVN
Nnat	neuronatin [Source:MGI Symbol;Acc:MGI:104716]	6.41941e-32	0.738586	0.712	0.549	1.41156e-27	VMH
Jun	jun proto-oncogene [Source:MGI Symbol;Acc:MGI:96646]	1.39541e-09	1.13401	0.327	0.131	3.06836e-05	PVN
Jun	jun proto-oncogene [Source:MGI Symbol;Acc:MGI:96646]	2.67675e-21	1.287	0.315	0.12	5.88591e-17	SCN
Clu	clusterin [Source:MGI Symbol;Acc:MGI:88423]	2.2623e-08	0.484503	0.974	0.87	0.000497457	PVN
Clu	clusterin [Source:MGI Symbol;Acc:MGI:88423]	1.23628e-08	0.263729	0.901	0.863	0.000271845	VMH
Cst3	cystatin C [Source:MGI Symbol;Acc:MGI:102519]	1.14856e-06	0.371485	0.994	0.99	0.0252557	PVN
Cst3	cystatin C [Source:MGI Symbol;Acc:MGI:102519]	3.31871e-05	0.250857	0.991	0.99	0.729751	SCN
Psap	prosaposin [Source:MGI Symbol;Acc:MGI:97783]	2.02095e-06	0.434808	0.904	0.819	0.0444387	PVN
Psap	prosaposin [Source:MGI Symbol;Acc:MGI:97783]	6.75409e-15	0.343453	0.858	0.806	1.48516e-10	VMH
Fosb	FBJ osteosarcoma oncogene B [Source:MGI Symbol;Acc:MGI:95575]	3.58389e-06	0.824547	0.186	0.069	0.0788062	PVN
Fosb	FBJ osteosarcoma oncogene B [Source:MGI Symbol;Acc:MGI:95575]	1.22318e-12	0.943764	0.187	0.061	2.68964e-08	SCN
Gadd45g	growth arrest and DNA-damage-inducible 45 gamma [Source:MGI Symbol;Acc:MGI:1346325]	2.40853e-05	0.768292	0.442	0.281	0.529612	PVN
Gadd45g	growth arrest and DNA-damage-inducible 45 gamma [Source:MGI Symbol;Acc:MGI:1346325]	2.77791e-24	1.13476	0.477	0.267	6.10834e-20	SCN
Mrps6	mitochondrial ribosomal protein S6 [Source:MGI Symbol;Acc:MGI:2153111]	3.50264e-05	0.588909	0.173	0.063	0.770194	PVN
Sparcl1	SPARC-like 1 [Source:MGI Symbol;Acc:MGI:108110]	4.66865e-05	0.261233	0.994	0.954	1	PVN
Btg2	BTG anti-proliferation factor 2 [Source:MGI Symbol;Acc:MGI:108384]	4.74892e-05	0.719683	0.269	0.136	1	PVN
Btg2	BTG anti-proliferation factor 2 [Source:MGI Symbol;Acc:MGI:108384]	9.58934e-16	0.987172	0.305	0.124	2.1086e-11	SCN
Sorbs1	sorbin and SH3 domain containing 1 [Source:MGI Symbol;Acc:MGI:700014]	7.28478e-05	0.401116	0.699	0.523	1	PVN
Sorbs1	sorbin and SH3 domain containing 1 [Source:MGI Symbol;Acc:MGI:700014]	1.47899e-08	0.300661	0.547	0.525	0.000325215	VMH
Cct6a	chaperonin containing Tcp1, subunit 6a (zeta) [Source:MGI Symbol;Acc:MGI:107943]	0.000222262	0.604721	0.167	0.069	1	PVN
Rab1a	RAB1A, member RAS oncogene family [Source:MGI Symbol;Acc:MGI:97842]	0.000320479	0.506629	0.244	0.123	1	PVN
Paqr6	progestin and adipoQ receptor family member VI [Source:MGI Symbol;Acc:MGI:1916207]	0.000400428	0.565108	0.34	0.2	1	PVN
Paqr6	progestin and adipoQ receptor family member VI [Source:MGI Symbol;Acc:MGI:1916207]	9.60683e-15	0.663946	0.286	0.169	2.11245e-10	VMH
Itm2c	integral membrane protein 2C [Source:MGI Symbol;Acc:MGI:1927594]	0.000468	0.444728	0.705	0.56	1	PVN
Itm2c	integral membrane protein 2C [Source:MGI Symbol;Acc:MGI:1927594]	6.88482e-14	0.454498	0.628	0.538	1.5139e-09	VMH
Aff1	AF4/FMR2 family, member 1 [Source:MGI Symbol;Acc:MGI:1100819]	0.000755349	0.636226	0.199	0.103	1	PVN
Rplp0	ribosomal protein, large, P0 [Source:MGI Symbol;Acc:MGI:1927636]	0.00102314	0.427506	0.173	0.079	1	PVN
Fzd3	frizzled class receptor 3 [Source:MGI Symbol;Acc:MGI:108476]	0.00109293	0.533559	0.263	0.152	1	PVN
Btbd9	BTB (POZ) domain containing 9 [Source:MGI Symbol;Acc:MGI:1916625]	0.00122567	0.404726	0.372	0.237	1	PVN
Cpe	carboxypeptidase E [Source:MGI Symbol;Acc:MGI:101932]	0.00123744	0.404935	0.968	0.945	1	PVN
Cpe	carboxypeptidase E [Source:MGI Symbol;Acc:MGI:101932]	1.16294e-07	0.320199	0.98	0.943	0.00255719	VPH
Cd9	CD9 antigen [Source:MGI Symbol;Acc:MGI:88348]	0.00139254	0.56321	0.391	0.257	1	PVN
Cd9	CD9 antigen [Source:MGI Symbol;Acc:MGI:88348]	6.89609e-07	0.51197	0.34	0.255	0.0151638	SCN
Golim4	golgi integral membrane protein 4 [Source:MGI Symbol;Acc:MGI:1920374]	0.00182442	0.507379	0.154	0.093	1	PVN
Amfr	autocrine motility factor receptor [Source:MGI Symbol;Acc:MGI:1345634]	0.00197087	0.535265	0.263	0.15	1	PVN
Pdgfd	platelet-derived growth factor, D polypeptide [Source:MGI Symbol;Acc:MGI:1919035]	0.00229842	0.442463	0.282	0.168	1	PVN
Pdgfd	platelet-derived growth factor, D polypeptide [Source:MGI Symbol;Acc:MGI:1919035]	0.000147003	0.362258	0.209	0.157	1	VMH
Rplp2	ribosomal protein, large P2 [Source:MGI Symbol;Acc:MGI:1914436]	0.00236682	0.547072	0.154	0.077	1	PVN
Rplp2	ribosomal protein, large P2 [Source:MGI Symbol;Acc:MGI:1914436]	6.22992e-07	0.587446	0.162	0.072	0.013699	SCN
2310022B05Rik	RIKEN cDNA 2310022B05 gene [Source:MGI Symbol;Acc:MGI:1916801]	0.00239723	0.429024	0.494	0.398	1	PVN
Rdh5	retinol dehydrogenase 5 [Source:MGI Symbol;Acc:MGI:1201412]	0.00256841	0.554955	0.173	0.092	1	PVN
Sumo2	small ubiquitin-like modifier 2 [Source:MGI Symbol;Acc:MGI:2158813]	0.00283956	0.385909	0.212	0.115	1	PVN
Adcy8	adenylate cyclase 8 [Source:MGI Symbol;Acc:MGI:1341110]	0.00319047	0.385641	0.654	0.525	1	PVN
BC005537	cDNA sequence BC005537 [Source:MGI Symbol;Acc:MGI:2441726]	0.00364174	0.388438	0.224	0.127	1	PVN
D8Ertd738e	DNA segment, Chr 8, ERATO Doi 738, expressed [Source:MGI Symbol;Acc:MGI:1289231]	0.00390135	0.389742	0.237	0.138	1	PVN
D8Ertd738e	DNA segment, Chr 8, ERATO Doi 738, expressed [Source:MGI Symbol;Acc:MGI:1289231]	0.000368569	0.474447	0.196	0.137	1	SCN
Enho	energy homeostasis associated [Source:MGI Symbol;Acc:MGI:1916888]	0.00427072	0.543857	0.353	0.241	1	PVN
Pigt	phosphatidylinositol glycan anchor biosynthesis, class T [Source:MGI Symbol;Acc:MGI:1926178]	0.00438191	0.510957	0.25	0.151	1	PVN
Pdcd4	programmed cell death 4 [Source:MGI Symbol;Acc:MGI:107490]	0.00439558	0.477087	0.173	0.087	1	PVN
Gpr37	G protein-coupled receptor 37 [Source:MGI Symbol;Acc:MGI:1313297]	0.00481907	0.415019	0.167	0.084	1	PVN
Copb1	coatomer protein complex, subunit beta 1 [Source:MGI Symbol;Acc:MGI:1917599]	0.00496305	0.471967	0.16	0.081	1	PVN
Tmbim6	transmembrane BAX inhibitor motif containing 6 [Source:MGI Symbol;Acc:MGI:99682]	0.00510627	0.460191	0.359	0.24	1	PVN
Tmbim6	transmembrane BAX inhibitor motif containing 6 [Source:MGI Symbol;Acc:MGI:99682]	0.000239977	0.414714	0.321	0.237	1	SCN
Kcnj10	potassium inwardly-rectifying channel, subfamily J, member 10 [Source:MGI Symbol;Acc:MGI:1194504]	0.00547788	0.420958	0.429	0.34	1	PVN
Rps29	ribosomal protein S29 [Source:MGI Symbol;Acc:MGI:107681]	0.00565663	0.525524	0.25	0.167	1	PVN
Rps29	ribosomal protein S29 [Source:MGI Symbol;Acc:MGI:107681]	1.13428e-05	0.534498	0.255	0.162	0.249418	SCN
Jund	jun D proto-oncogene [Source:MGI Symbol;Acc:MGI:96648]	0.00600661	0.579519	0.218	0.139	1	PVN
Jund	jun D proto-oncogene [Source:MGI Symbol;Acc:MGI:96648]	0.000347639	0.497399	0.209	0.135	1	SCN
Camk2d	calcium/calmodulin-dependent protein kinase II, delta [Source:MGI Symbol;Acc:MGI:1341265]	0.00611955	0.36136	0.538	0.471	1	PVN
Cmtm5	CKLF-like MARVEL transmembrane domain containing 5 [Source:MGI Symbol;Acc:MGI:2447164]	0.00638717	0.393288	0.295	0.187	1	PVN
Eef1d	eukaryotic translation elongation factor 1 delta (guanine nucleotide exchange protein) [Source:MGI Symbol;Acc:MGI:1913906]	0.00656065	0.414587	0.231	0.135	1	PVN
Grin2b	glutamate receptor, ionotropic, NMDA2B (epsilon 2) [Source:MGI Symbol;Acc:MGI:95821]	0.0069507	0.429481	0.256	0.155	1	PVN
Lcat	lecithin cholesterol acyltransferase [Source:MGI Symbol;Acc:MGI:96755]	0.00706818	0.465458	0.173	0.09	1	PVN
Ppp2r1a	protein phosphatase 2, regulatory subunit A, alpha [Source:MGI Symbol;Acc:MGI:1926334]	0.00778147	0.451857	0.192	0.107	1	PVN
Rps14	ribosomal protein S14 [Source:MGI Symbol;Acc:MGI:98107]	0.00815352	0.49674	0.224	0.133	1	PVN
Rps14	ribosomal protein S14 [Source:MGI Symbol;Acc:MGI:98107]	9.04742e-10	0.750419	0.255	0.124	1.98944e-05	SCN
Rftn2	raftlin family member 2 [Source:MGI Symbol;Acc:MGI:1921263]	0.00876433	0.455287	0.256	0.171	1	PVN
Myl6	myosin, light polypeptide 6, alkali, smooth muscle and non-muscle [Source:MGI Symbol;Acc:MGI:109318]	0.0094467	0.421546	0.224	0.132	1	PVN
Zc3h14	zinc finger CCCH type containing 14 [Source:MGI Symbol;Acc:MGI:1919824]	0.00961315	0.35926	0.16	0.083	1	PVN
Dbi	diazepam binding inhibitor [Source:MGI Symbol;Acc:MGI:94865]	1.58184e-24	0.845708	0.897	0.794	3.47831e-20	SCN
Fth1	ferritin heavy polypeptide 1 [Source:MGI Symbol;Acc:MGI:95588]	1.27402e-17	0.880345	0.495	0.29	2.80145e-13	SCN
H3f3b	H3.3 histone B [Source:MGI Symbol;Acc:MGI:1101768]	2.97801e-16	0.935636	0.439	0.244	6.54835e-12	SCN
Apoe	apolipoprotein E [Source:MGI Symbol;Acc:MGI:88057]	3.20694e-16	0.373776	1	1	7.05174e-12	SCN
Hspa8	heat shock protein 8 [Source:MGI Symbol;Acc:MGI:105384]	3.31047e-13	0.596038	0.682	0.524	7.27938e-09	SCN
Marcks	myristoylated alanine rich protein kinase C substrate [Source:MGI Symbol;Acc:MGI:96907]	1.78921e-12	0.483393	0.533	0.503	3.9343e-08	SCN
Eef1a1	eukaryotic translation elongation factor 1 alpha 1 [Source:MGI Symbol;Acc:MGI:1096881]	5.46747e-12	0.826077	0.246	0.1	1.20224e-07	SCN
App	amyloid beta (A4) precursor protein [Source:MGI Symbol;Acc:MGI:88059]	9.64801e-12	0.709228	0.402	0.254	2.1215e-07	SCN
Rps27a	ribosomal protein S27A [Source:MGI Symbol;Acc:MGI:1925544]	1.29205e-11	0.764034	0.159	0.046	2.84108e-07	SCN
Ubb	ubiquitin B [Source:MGI Symbol;Acc:MGI:98888]	1.41496e-11	0.629804	0.514	0.344	3.11135e-07	SCN
mt-Co2	mitochondrially encoded cytochrome c oxidase II [Source:MGI Symbol;Acc:MGI:102503]	7.79392e-11	0.39379	0.844	0.844	1.71381e-06	SCN
Socs3	suppressor of cytokine signaling 3 [Source:MGI Symbol;Acc:MGI:1201791]	2.66547e-10	0.83339	0.187	0.068	5.8611e-06	SCN
Rps16	ribosomal protein S16 [Source:MGI Symbol;Acc:MGI:98118]	3.7475e-10	0.742408	0.178	0.063	8.24037e-06	SCN
Hmgcs1	3-hydroxy-3-methylglutaryl-Coenzyme A synthase 1 [Source:MGI Symbol;Acc:MGI:107592]	6.11292e-10	0.669233	0.436	0.288	1.34417e-05	SCN
Rpl13a	ribosomal protein L13A [Source:MGI Symbol;Acc:MGI:1351455]	6.52978e-10	0.767341	0.293	0.159	1.43583e-05	SCN
Cox4i1	cytochrome c oxidase subunit 4I1 [Source:MGI Symbol;Acc:MGI:88473]	8.28523e-10	0.545806	0.561	0.441	1.82184e-05	SCN
Cox4i1	cytochrome c oxidase subunit 4I1 [Source:MGI Symbol;Acc:MGI:88473]	9.50631e-05	0.39081	0.579	0.443	1	VPH
Rpl41	ribosomal protein L41 [Source:MGI Symbol;Acc:MGI:1915195]	1.79538e-09	0.675571	0.389	0.253	3.94787e-05	SCN
mt-Co3	mitochondrially encoded cytochrome c oxidase III [Source:MGI Symbol;Acc:MGI:102502]	2.33759e-09	0.437112	0.953	0.911	5.14013e-05	SCN
mt-Co3	mitochondrially encoded cytochrome c oxidase III [Source:MGI Symbol;Acc:MGI:102502]	2.53451e-06	0.321307	0.961	0.911	0.0557313	VPH
Actg1	actin, gamma, cytoplasmic 1 [Source:MGI Symbol;Acc:MGI:87906]	6.55724e-09	0.473955	0.542	0.488	0.000144187	SCN
Tuba1a	tubulin, alpha 1A [Source:MGI Symbol;Acc:MGI:98869]	9.8352e-09	0.667114	0.308	0.221	0.000216266	SCN
Rpl18a	ribosomal protein L18A [Source:MGI Symbol;Acc:MGI:1924058]	1.21973e-08	0.691554	0.215	0.094	0.000268206	SCN
Rpl37a	ribosomal protein L37a [Source:MGI Symbol;Acc:MGI:98068]	1.65456e-08	0.6357	0.296	0.161	0.000363821	SCN
Rps15	ribosomal protein S15 [Source:MGI Symbol;Acc:MGI:98117]	2.82806e-08	0.600378	0.159	0.06	0.000621861	SCN
mt-Nd1	mitochondrially encoded NADH dehydrogenase 1 [Source:MGI Symbol;Acc:MGI:101787]	4.87977e-08	0.4139	0.894	0.861	0.00107301	SCN
mt-Nd1	mitochondrially encoded NADH dehydrogenase 1 [Source:MGI Symbol;Acc:MGI:101787]	0.000154678	0.304748	0.913	0.86	1	VPH
Rpl14	ribosomal protein L14 [Source:MGI Symbol;Acc:MGI:1914365]	7.28986e-08	0.570311	0.187	0.079	0.00160297	SCN
Fau	Finkel-Biskis-Reilly murine sarcoma virus (FBR-MuSV) ubiquitously expressed (fox derived) [Source:MGI Symbol;Acc:MGI:102547]	9.69507e-08	0.624422	0.209	0.121	0.00213185	SCN
Rps27	ribosomal protein S27 [Source:MGI Symbol;Acc:MGI:1888676]	1.31737e-07	0.672628	0.165	0.069	0.00289678	SCN
Cd81	CD81 antigen [Source:MGI Symbol;Acc:MGI:1096398]	1.67673e-07	0.394091	0.885	0.817	0.00368697	SCN
mt-Atp6	mitochondrially encoded ATP synthase 6 [Source:MGI Symbol;Acc:MGI:99927]	1.93294e-07	0.390621	0.938	0.918	0.00425034	SCN
mt-Atp6	mitochondrially encoded ATP synthase 6 [Source:MGI Symbol;Acc:MGI:99927]	7.09663e-07	0.339081	0.953	0.917	0.0156048	VPH
Id3	inhibitor of DNA binding 3 [Source:MGI Symbol;Acc:MGI:96398]	2.14799e-07	0.675321	0.29	0.206	0.00472321	SCN
mt-Cytb	mitochondrially encoded cytochrome b [Source:MGI Symbol;Acc:MGI:102501]	2.988e-07	0.339785	0.919	0.892	0.00657032	SCN
Mt2	metallothionein 2 [Source:MGI Symbol;Acc:MGI:97172]	3.56173e-07	0.490034	0.576	0.495	0.00783188	SCN
Rpl24	ribosomal protein L24 [Source:MGI Symbol;Acc:MGI:1915443]	3.8991e-07	0.701778	0.209	0.117	0.00857374	SCN
Rplp1	ribosomal protein, large, P1 [Source:MGI Symbol;Acc:MGI:1927099]	4.1314e-07	0.627355	0.221	0.113	0.00908453	SCN
Rpl13	ribosomal protein L13 [Source:MGI Symbol;Acc:MGI:105922]	4.30953e-07	0.564933	0.364	0.232	0.00947622	SCN
Rpl13	ribosomal protein L13 [Source:MGI Symbol;Acc:MGI:105922]	0.00386275	0.338052	0.335	0.238	1	VPH
Rps2	ribosomal protein S2 [Source:MGI Symbol;Acc:MGI:105110]	8.2014e-07	0.55103	0.209	0.101	0.0180341	SCN
Nr4a1	nuclear receptor subfamily 4, group A, member 1 [Source:MGI Symbol;Acc:MGI:1352454]	1.05077e-06	0.64106	0.168	0.078	0.0231054	SCN
Id2	inhibitor of DNA binding 2 [Source:MGI Symbol;Acc:MGI:96397]	1.29004e-06	0.467243	0.576	0.481	0.0283667	SCN
Scd2	stearoyl-Coenzyme A desaturase 2 [Source:MGI Symbol;Acc:MGI:98240]	1.38573e-06	0.319937	0.794	0.792	0.0304707	SCN
Sulf2	sulfatase 2 [Source:MGI Symbol;Acc:MGI:1919293]	1.76735e-06	0.569403	0.159	0.07	0.0388622	SCN
Rpl38	ribosomal protein L38 [Source:MGI Symbol;Acc:MGI:1914921]	2.3238e-06	0.503402	0.156	0.067	0.051098	SCN
mt-Co1	mitochondrially encoded cytochrome c oxidase I [Source:MGI Symbol;Acc:MGI:102504]	2.53802e-06	0.375742	0.928	0.918	0.0558085	SCN
Hsp90ab1	heat shock protein 90 alpha (cytosolic), class B member 1 [Source:MGI Symbol;Acc:MGI:96247]	2.53812e-06	0.53984	0.355	0.24	0.0558107	SCN
Tmsb4x	thymosin, beta 4, X chromosome [Source:MGI Symbol;Acc:MGI:99510]	3.5681e-06	0.603383	0.224	0.119	0.0784589	SCN
Rpl3	ribosomal protein L3 [Source:MGI Symbol;Acc:MGI:1351605]	3.93568e-06	0.57825	0.184	0.091	0.0865417	SCN
Rps8	ribosomal protein S8 [Source:MGI Symbol;Acc:MGI:98166]	4.1463e-06	0.570103	0.168	0.079	0.091173	SCN
Itm2b	integral membrane protein 2B [Source:MGI Symbol;Acc:MGI:1309517]	4.29714e-06	0.400225	0.586	0.506	0.0944899	SCN
Ednrb	endothelin receptor type B [Source:MGI Symbol;Acc:MGI:102720]	5.63482e-06	0.350419	0.688	0.62	0.123904	SCN
Ednrb	endothelin receptor type B [Source:MGI Symbol;Acc:MGI:102720]	0.000568225	0.286407	0.724	0.619	1	VPH
Ndufa2	NADH:ubiquinone oxidoreductase subunit A2 [Source:MGI Symbol;Acc:MGI:1343103]	5.91845e-06	0.487535	0.259	0.197	0.130141	SCN
Pcsk1n	proprotein convertase subtilisin/kexin type 1 inhibitor [Source:MGI Symbol;Acc:MGI:1353431]	6.25631e-06	0.50795	0.224	0.121	0.13757	SCN
Jmjd1c	jumonji domain containing 1C [Source:MGI Symbol;Acc:MGI:1918614]	1.00896e-05	0.448635	0.486	0.426	0.22186	SCN
Ptma	prothymosin alpha [Source:MGI Symbol;Acc:MGI:97803]	1.03327e-05	0.580584	0.234	0.139	0.227206	SCN
Eif1	eukaryotic translation initiation factor 1 [Source:MGI Symbol;Acc:MGI:105125]	1.04163e-05	0.474561	0.355	0.277	0.229044	SCN
Ramp1	receptor (calcitonin) activity modifying protein 1 [Source:MGI Symbol;Acc:MGI:1858418]	1.39567e-05	0.448992	0.508	0.402	0.306894	SCN
Arih1	ariadne RBR E3 ubiquitin protein ligase 1 [Source:MGI Symbol;Acc:MGI:1344363]	1.66087e-05	0.500433	0.333	0.295	0.365209	SCN
Arl6ip1	ADP-ribosylation factor-like 6 interacting protein 1 [Source:MGI Symbol;Acc:MGI:1858943]	2.30684e-05	0.446316	0.389	0.273	0.507252	SCN
Cox6b1	cytochrome c oxidase, subunit 6B1 [Source:MGI Symbol;Acc:MGI:107460]	2.50563e-05	0.501401	0.343	0.243	0.550963	SCN
Homer1	homer scaffolding protein 1 [Source:MGI Symbol;Acc:MGI:1347345]	2.79841e-05	0.733223	0.165	0.091	0.615343	SCN
Atp6v0c	ATPase, H+ transporting, lysosomal V0 subunit C [Source:MGI Symbol;Acc:MGI:88116]	2.92162e-05	0.426424	0.43	0.342	0.642435	SCN
Romo1	reactive oxygen species modulator 1 [Source:MGI Symbol;Acc:MGI:1914317]	3.36845e-05	0.507463	0.171	0.098	0.740688	SCN
Stat3	signal transducer and activator of transcription 3 [Source:MGI Symbol;Acc:MGI:103038]	4.94096e-05	0.513376	0.343	0.252	1	SCN
Selenom	selenoprotein M [Source:MGI Symbol;Acc:MGI:2149786]	5.02104e-05	0.51907	0.206	0.116	1	SCN
Rheb	Ras homolog enriched in brain [Source:MGI Symbol;Acc:MGI:97912]	5.09901e-05	0.509308	0.209	0.119	1	SCN
Tnc	tenascin C [Source:MGI Symbol;Acc:MGI:101922]	5.10085e-05	0.510777	0.293	0.195	1	SCN
Rpl6	ribosomal protein L6 [Source:MGI Symbol;Acc:MGI:108057]	6.53304e-05	0.510777	0.153	0.081	1	SCN
Rps18	ribosomal protein S18 [Source:MGI Symbol;Acc:MGI:98146]	7.09087e-05	0.486673	0.221	0.13	1	SCN
Gm10635	predicted gene 10635 [Source:MGI Symbol;Acc:MGI:3641740]	9.06988e-05	0.539122	0.181	0.119	1	SCN
Sub1	SUB1 homolog, transcriptional regulator [Source:MGI Symbol;Acc:MGI:104811]	9.41448e-05	0.468878	0.196	0.117	1	SCN
Ndufa13	NADH:ubiquinone oxidoreductase subunit A13 [Source:MGI Symbol;Acc:MGI:1914434]	9.6431e-05	0.330992	0.383	0.336	1	SCN
Ubc	ubiquitin C [Source:MGI Symbol;Acc:MGI:98889]	0.000107427	0.375611	0.458	0.37	1	SCN
Scd1	stearoyl-Coenzyme A desaturase 1 [Source:MGI Symbol;Acc:MGI:98239]	0.000110662	0.467947	0.162	0.085	1	SCN
Btaf1	B-TFIID TATA-box binding protein associated factor 1 [Source:MGI Symbol;Acc:MGI:2147538]	0.000117728	0.415206	0.187	0.165	1	SCN
Ftl1	ferritin light polypeptide 1 [Source:MGI Symbol;Acc:MGI:95589]	0.000130909	0.406787	0.405	0.334	1	SCN
Rpl29	ribosomal protein L29 [Source:MGI Symbol;Acc:MGI:99687]	0.000147417	0.44292	0.206	0.118	1	SCN
Tiparp	TCDD-inducible poly(ADP-ribose) polymerase [Source:MGI Symbol;Acc:MGI:2159210]	0.000151779	0.387942	0.262	0.164	1	SCN
Uqcrq	ubiquinol-cytochrome c reductase, complex III subunit VII [Source:MGI Symbol;Acc:MGI:107807]	0.000164738	0.387002	0.374	0.304	1	SCN
Plat	plasminogen activator, tissue [Source:MGI Symbol;Acc:MGI:97610]	0.00017789	0.49851	0.252	0.166	1	SCN
Rpl28	ribosomal protein L28 [Source:MGI Symbol;Acc:MGI:101839]	0.000205358	0.446123	0.168	0.095	1	SCN
Atp5g3	ATP synthase, H+ transporting, mitochondrial F0 complex, subunit C3 (subunit 9) [Source:MGI Symbol;Acc:MGI:2442035]	0.000208759	0.450959	0.243	0.153	1	SCN
Rps3a1	ribosomal protein S3A1 [Source:MGI Symbol;Acc:MGI:1202063]	0.00022407	0.455508	0.153	0.079	1	SCN
Calm1	calmodulin 1 [Source:MGI Symbol;Acc:MGI:88251]	0.000231395	0.482578	0.234	0.15	1	SCN
Calm3	calmodulin 3 [Source:MGI Symbol;Acc:MGI:103249]	0.000431123	0.386669	0.271	0.178	1	SCN
Ndufa4	Ndufa4, mitochondrial complex associated [Source:MGI Symbol;Acc:MGI:107686]	0.000252391	0.406717	0.361	0.26	1	SCN
Rpl8	ribosomal protein L8 [Source:MGI Symbol;Acc:MGI:1350927]	0.000271522	0.50411	0.199	0.12	1	SCN
Rpl11	ribosomal protein L11 [Source:MGI Symbol;Acc:MGI:1914275]	0.000326439	0.515116	0.178	0.113	1	SCN
Gm1673	predicted gene 1673 [Source:MGI Symbol;Acc:MGI:2686519]	0.000343954	0.462272	0.234	0.163	1	SCN
Sh3glb1	SH3-domain GRB2-like B1 (endophilin) [Source:MGI Symbol;Acc:MGI:1859730]	0.000412083	0.441285	0.187	0.112	1	SCN
Ndufb8	NADH:ubiquinone oxidoreductase subunit B8 [Source:MGI Symbol;Acc:MGI:1914514]	0.000416629	0.439916	0.224	0.161	1	SCN
Spcs2	signal peptidase complex subunit 2 homolog (S. cerevisiae) [Source:MGI Symbol;Acc:MGI:1913874]	0.000494448	0.293919	0.171	0.155	1	SCN
Marcksl1	MARCKS-like 1 [Source:MGI Symbol;Acc:MGI:97143]	0.000517309	0.467266	0.174	0.109	1	SCN
1810037I17Rik	RIKEN cDNA 1810037I17 gene [Source:MGI Symbol;Acc:MGI:1914954]	0.000527661	0.437023	0.227	0.158	1	SCN
Pfdn5	prefoldin 5 [Source:MGI Symbol;Acc:MGI:1928753]	0.000544076	0.474682	0.209	0.142	1	SCN
Higd1a	HIG1 domain family, member 1A [Source:MGI Symbol;Acc:MGI:1930666]	0.000564344	0.4449	0.184	0.123	1	SCN
Slc8a1	solute carrier family 8 (sodium/calcium exchanger), member 1 [Source:MGI Symbol;Acc:MGI:107956]	0.000565173	0.536361	0.202	0.13	1	SCN
Shisa4	shisa family member 4 [Source:MGI Symbol;Acc:MGI:1924802]	0.000606587	0.293331	0.174	0.158	1	SCN
Rpl7	ribosomal protein L7 [Source:MGI Symbol;Acc:MGI:98073]	0.000617701	0.366903	0.171	0.097	1	SCN
Fbxw4	F-box and WD-40 domain protein 4 [Source:MGI Symbol;Acc:MGI:1354698]	0.000786187	0.277357	0.15	0.129	1	SCN
Lamp1	lysosomal-associated membrane protein 1 [Source:MGI Symbol;Acc:MGI:96745]	0.000786765	0.363392	0.455	0.38	1	SCN
Rps19	ribosomal protein S19 [Source:MGI Symbol;Acc:MGI:1333780]	0.000794996	0.385678	0.215	0.133	1	SCN
Prdx5	peroxiredoxin 5 [Source:MGI Symbol;Acc:MGI:1859821]	0.000812297	0.43952	0.202	0.134	1	SCN
Syt11	synaptotagmin XI [Source:MGI Symbol;Acc:MGI:1859547]	0.000819464	0.331239	0.467	0.404	1	SCN
Hint1	histidine triad nucleotide binding protein 1 [Source:MGI Symbol;Acc:MGI:1321133]	0.0010628	0.427375	0.171	0.102	1	SCN
Rab5if	RAB5 interacting factor [Source:MGI Symbol;Acc:MGI:1914638]	0.00113207	0.404823	0.165	0.113	1	SCN
mt-Nd4	mitochondrially encoded NADH dehydrogenase 4 [Source:MGI Symbol;Acc:MGI:102498]	0.00115542	0.261545	0.819	0.788	1	SCN
Dclk1	doublecortin-like kinase 1 [Source:MGI Symbol;Acc:MGI:1330861]	0.0011903	0.287665	0.617	0.542	1	SCN
Dclk1	doublecortin-like kinase 1 [Source:MGI Symbol;Acc:MGI:1330861]	0.00117498	0.300998	0.642	0.542	1	VPH
Mdk	midkine [Source:MGI Symbol;Acc:MGI:96949]	0.00160198	0.359121	0.283	0.234	1	SCN
Cox6a1	cytochrome c oxidase subunit 6A1 [Source:MGI Symbol;Acc:MGI:103099]	0.00162564	0.332752	0.405	0.332	1	SCN
Eif1b	eukaryotic translation initiation factor 1B [Source:MGI Symbol;Acc:MGI:1916219]	0.00163393	0.426486	0.162	0.096	1	SCN
Aqp4	aquaporin 4 [Source:MGI Symbol;Acc:MGI:107387]	0.00166114	0.29507	0.551	0.5	1	SCN
Aqp4	aquaporin 4 [Source:MGI Symbol;Acc:MGI:107387]	0.00206725	0.344027	0.598	0.497	1	VPH
Rpl37	ribosomal protein L37 [Source:MGI Symbol;Acc:MGI:1914531]	0.00181885	0.313164	0.178	0.108	1	SCN
Rpl9	ribosomal protein L9 [Source:MGI Symbol;Acc:MGI:1298373]	0.00193188	0.375078	0.159	0.111	1	SCN
Tst	thiosulfate sulfurtransferase, mitochondrial [Source:MGI Symbol;Acc:MGI:98852]	0.00200897	0.333955	0.237	0.2	1	SCN
Tspan3	tetraspanin 3 [Source:MGI Symbol;Acc:MGI:1928098]	0.00208938	0.325173	0.517	0.429	1	SCN
Gstm1	glutathione S-transferase, mu 1 [Source:MGI Symbol;Acc:MGI:95860]	0.00214208	0.335385	0.358	0.32	1	SCN
Selenok	selenoprotein K [Source:MGI Symbol;Acc:MGI:1931466]	0.00217308	0.335574	0.324	0.264	1	SCN
Ppib	peptidylprolyl isomerase B [Source:MGI Symbol;Acc:MGI:97750]	0.00228451	0.334531	0.296	0.246	1	SCN
Rps9	ribosomal protein S9 [Source:MGI Symbol;Acc:MGI:1924096]	0.00234792	0.387781	0.212	0.137	1	SCN
Ywhae	tyrosine 3-monooxygenase/tryptophan 5-monooxygenase activation protein, epsilon polypeptide [Source:MGI Symbol;Acc:MGI:894689]	0.00272451	0.263643	0.371	0.338	1	SCN
Reln	reelin [Source:MGI Symbol;Acc:MGI:103022]	0.00285099	0.362346	0.215	0.141	1	SCN
Mpc2	mitochondrial pyruvate carrier 2 [Source:MGI Symbol;Acc:MGI:1917706]	0.00306071	0.378664	0.165	0.113	1	SCN
Cacnb2	calcium channel, voltage-dependent, beta 2 subunit [Source:MGI Symbol;Acc:MGI:894644]	0.00352664	0.416372	0.165	0.122	1	SCN
Rpl5	ribosomal protein L5 [Source:MGI Symbol;Acc:MGI:102854]	0.00355638	0.377903	0.153	0.105	1	SCN
Tecr	trans-2,3-enoyl-CoA reductase [Source:MGI Symbol;Acc:MGI:1915408]	0.00359743	0.252454	0.38	0.355	1	SCN
Atp5e	ATP synthase, H+ transporting, mitochondrial F1 complex, epsilon subunit [Source:MGI Symbol;Acc:MGI:1855697]	0.00366937	0.385676	0.24	0.168	1	SCN
Grcc10	gene rich cluster, C10 gene [Source:MGI Symbol;Acc:MGI:1315201]	0.00367295	0.401054	0.24	0.167	1	SCN
Atp5mpl	ATP synthase membrane subunit 6.8PL [Source:MGI Symbol;Acc:MGI:1917507]	0.00373368	0.372647	0.202	0.141	1	SCN
Ubl5	ubiquitin-like 5 [Source:MGI Symbol;Acc:MGI:1913427]	0.00374243	0.326027	0.178	0.111	1	SCN
Elovl6	ELOVL family member 6, elongation of long chain fatty acids (yeast) [Source:MGI Symbol;Acc:MGI:2156528]	0.00396059	0.310441	0.212	0.184	1	SCN
Ptpn12	protein tyrosine phosphatase, non-receptor type 12 [Source:MGI Symbol;Acc:MGI:104673]	0.00411454	0.373632	0.199	0.136	1	SCN
Id4	inhibitor of DNA binding 4 [Source:MGI Symbol;Acc:MGI:99414]	0.00421024	0.451448	0.19	0.13	1	SCN
Lxn	latexin [Source:MGI Symbol;Acc:MGI:107633]	0.00427606	0.373715	0.206	0.16	1	SCN
Igsf1	immunoglobulin superfamily, member 1 [Source:MGI Symbol;Acc:MGI:2147913]	0.00460223	0.265939	0.417	0.388	1	SCN
Eef1g	eukaryotic translation elongation factor 1 gamma [Source:MGI Symbol;Acc:MGI:1914410]	0.00492196	0.372863	0.178	0.118	1	SCN
Tpt1	tumor protein, translationally-controlled 1 [Source:MGI Symbol;Acc:MGI:104890]	0.0049852	0.36205	0.159	0.101	1	SCN
Emc7	ER membrane protein complex subunit 7 [Source:MGI Symbol;Acc:MGI:1920274]	0.0050569	0.335378	0.215	0.143	1	SCN
Slc25a5	solute carrier family 25 (mitochondrial carrier, adenine nucleotide translocator), member 5 [Source:MGI Symbol;Acc:MGI:1353496]	0.00515567	0.325169	0.265	0.214	1	SCN
Hsbp1	heat shock factor binding protein 1 [Source:MGI Symbol;Acc:MGI:1915446]	0.00515588	0.357865	0.209	0.139	1	SCN
Ergic3	ERGIC and golgi 3 [Source:MGI Symbol;Acc:MGI:1913616]	0.00519123	0.342575	0.215	0.164	1	SCN
Slc22a17	solute carrier family 22 (organic cation transporter), member 17 [Source:MGI Symbol;Acc:MGI:1926225]	0.00527167	0.335621	0.374	0.297	1	SCN
Tmed7	transmembrane p24 trafficking protein 7 [Source:MGI Symbol;Acc:MGI:1913926]	0.00629954	0.337934	0.15	0.104	1	SCN
Gnas	GNAS (guanine nucleotide binding protein, alpha stimulating) complex locus [Source:MGI Symbol;Acc:MGI:95777]	0.00631225	0.332115	0.355	0.289	1	SCN
Nedd8	neural precursor cell expressed, developmentally down-regulated gene 8 [Source:MGI Symbol;Acc:MGI:97301]	0.00650543	0.349199	0.174	0.131	1	SCN
Ndufa6	NADH:ubiquinone oxidoreductase subunit A6 [Source:MGI Symbol;Acc:MGI:1914380]	0.00660812	0.376528	0.159	0.103	1	SCN
Mrfap1	Morf4 family associated protein 1 [Source:MGI Symbol;Acc:MGI:1914818]	0.00669515	0.378087	0.168	0.108	1	SCN
Atp5j2	ATP synthase, H+ transporting, mitochondrial F0 complex, subunit F2 [Source:MGI Symbol;Acc:MGI:1927558]	0.00673011	0.3404	0.28	0.214	1	SCN
Rpl23a	ribosomal protein L23A [Source:MGI Symbol;Acc:MGI:3040672]	0.00685218	0.331471	0.237	0.168	1	SCN
Rpl18	ribosomal protein L18 [Source:MGI Symbol;Acc:MGI:98003]	0.00704347	0.355315	0.277	0.211	1	SCN
Hmgn1	high mobility group nucleosomal binding domain 1 [Source:MGI Symbol;Acc:MGI:96120]	0.00722441	0.315133	0.15	0.122	1	SCN
Slc14a1	solute carrier family 14 (urea transporter), member 1 [Source:MGI Symbol;Acc:MGI:1351654]	0.00783154	0.319434	0.174	0.139	1	SCN
Ndufb2	NADH:ubiquinone oxidoreductase subunit B2 [Source:MGI Symbol;Acc:MGI:1915448]	0.00851751	0.341147	0.193	0.143	1	SCN
Anapc13	anaphase promoting complex subunit 13 [Source:MGI Symbol;Acc:MGI:1916260]	0.00874825	0.36959	0.15	0.096	1	SCN
Efna5	ephrin A5 [Source:MGI Symbol;Acc:MGI:107444]	0.00908026	0.409475	0.187	0.129	1	SCN
Phpt1	phosphohistidine phosphatase 1 [Source:MGI Symbol;Acc:MGI:1922704]	0.00923034	0.384195	0.196	0.136	1	SCN
Ankrd11	ankyrin repeat domain 11 [Source:MGI Symbol;Acc:MGI:1924337]	0.00977963	0.308763	0.271	0.236	1	SCN
Fabp5	fatty acid binding protein 5, epidermal [Source:MGI Symbol;Acc:MGI:101790]	0.00985258	0.25574	0.433	0.405	1	SCN
Fabp5	fatty acid binding protein 5, epidermal [Source:MGI Symbol;Acc:MGI:101790]	0.000300581	0.450554	0.52	0.398	1	VPH
5031439G07Rik	RIKEN cDNA 5031439G07 gene [Source:MGI Symbol;Acc:MGI:2444899]	4.00675e-29	0.864729	0.377	0.19	8.81045e-25	VMH
Pitpnc1	phosphatidylinositol transfer protein, cytoplasmic 1 [Source:MGI Symbol;Acc:MGI:1919045]	1.55823e-26	0.525687	0.84	0.74	3.4264e-22	VMH
Ntsr2	neurotensin receptor 2 [Source:MGI Symbol;Acc:MGI:108018]	3.27427e-26	0.634849	0.653	0.504	7.19979e-22	VMH
Gpld1	glycosylphosphatidylinositol specific phospholipase D1 [Source:MGI Symbol;Acc:MGI:106604]	1.36854e-25	0.758253	0.489	0.322	3.00929e-21	VMH
Glul	glutamate-ammonia ligase (glutamine synthetase) [Source:MGI Symbol;Acc:MGI:95739]	3.72252e-21	0.533353	0.653	0.518	8.18545e-17	VMH
Xist	inactive X specific transcripts [Source:MGI Symbol;Acc:MGI:98974]	9.26177e-20	0.58879	0.571	0.396	2.03657e-15	VMH
Atp1a2	ATPase, Na+/K+ transporting, alpha 2 polypeptide [Source:MGI Symbol;Acc:MGI:88106]	1.72104e-19	0.325008	0.967	0.945	3.78439e-15	VMH
Prnp	prion protein [Source:MGI Symbol;Acc:MGI:97769]	1.16395e-18	0.501194	0.664	0.53	2.55942e-14	VMH
S1pr1	sphingosine-1-phosphate receptor 1 [Source:MGI Symbol;Acc:MGI:1096355]	5.45695e-16	0.514415	0.45	0.345	1.19993e-11	VMH
Zfhx3	zinc finger homeobox 3 [Source:MGI Symbol;Acc:MGI:99948]	2.01047e-15	0.681778	0.172	0.072	4.42082e-11	VMH
St3gal4	ST3 beta-galactoside alpha-2,3-sialyltransferase 4 [Source:MGI Symbol;Acc:MGI:1316743]	2.62699e-14	0.561851	0.448	0.332	5.77649e-10	VMH
Cntn1	contactin 1 [Source:MGI Symbol;Acc:MGI:105980]	5.67783e-14	0.714151	0.181	0.085	1.2485e-09	VMH
Gpr37l1	G protein-coupled receptor 37-like 1 [Source:MGI Symbol;Acc:MGI:1928503]	6.92145e-14	0.352938	0.787	0.698	1.52196e-09	VMH
Paqr7	progestin and adipoQ receptor family member VII [Source:MGI Symbol;Acc:MGI:1919154]	1.04114e-13	0.508196	0.425	0.298	2.28936e-09	VMH
Adgrb1	adhesion G protein-coupled receptor B1 [Source:MGI Symbol;Acc:MGI:1933736]	1.04797e-13	0.491881	0.444	0.33	2.30439e-09	VMH
Cd38	CD38 antigen [Source:MGI Symbol;Acc:MGI:107474]	8.34053e-13	0.584044	0.232	0.142	1.834e-08	VMH
Gjb6	gap junction protein, beta 6 [Source:MGI Symbol;Acc:MGI:107588]	9.51626e-13	0.569656	0.312	0.2	2.09253e-08	VMH
Acsl3	acyl-CoA synthetase long-chain family member 3 [Source:MGI Symbol;Acc:MGI:1921455]	1.07842e-12	0.432305	0.567	0.476	2.37135e-08	VMH
Tmem47	transmembrane protein 47 [Source:MGI Symbol;Acc:MGI:2177570]	4.62074e-12	0.505763	0.385	0.273	1.01605e-07	VMH
Phkg1	phosphorylase kinase gamma 1 [Source:MGI Symbol;Acc:MGI:97579]	6.03853e-12	0.512905	0.344	0.247	1.32781e-07	VMH
F3	coagulation factor III [Source:MGI Symbol;Acc:MGI:88381]	1.00871e-11	0.419025	0.57	0.473	2.21805e-07	VMH
Ttyh1	tweety family member 1 [Source:MGI Symbol;Acc:MGI:1889007]	1.86532e-11	0.344986	0.706	0.619	4.10165e-07	VMH
Grin2c	glutamate receptor, ionotropic, NMDA2C (epsilon 3) [Source:MGI Symbol;Acc:MGI:95822]	2.31237e-11	0.580641	0.184	0.103	5.08466e-07	VMH
Rtn1	reticulon 1 [Source:MGI Symbol;Acc:MGI:1933947]	6.0642e-11	0.509514	0.159	0.084	1.33346e-06	VMH
Rmst	rhabdomyosarcoma 2 associated transcript (non-coding RNA) [Source:MGI Symbol;Acc:MGI:1099806]	1.80761e-10	0.57867	0.229	0.139	3.97475e-06	VMH
Ndrg2	N-myc downstream regulated gene 2 [Source:MGI Symbol;Acc:MGI:1352498]	2.0116e-10	0.297724	0.823	0.781	4.42331e-06	VMH
Slc6a1	solute carrier family 6 (neurotransmitter transporter, GABA), member 1 [Source:MGI Symbol;Acc:MGI:95627]	2.1468e-10	0.31744	0.676	0.599	4.72061e-06	VMH
Gja1	gap junction protein, alpha 1 [Source:MGI Symbol;Acc:MGI:95713]	8.87943e-10	0.318683	0.743	0.657	1.9525e-05	VMH
Atp1b2	ATPase, Na+/K+ transporting, beta 2 polypeptide [Source:MGI Symbol;Acc:MGI:88109]	2.26891e-09	0.297665	0.7	0.639	4.9891e-05	VMH
Kcnn2	potassium intermediate/small conductance calcium-activated channel, subfamily N, member 2 [Source:MGI Symbol;Acc:MGI:2153182]	3.43875e-09	0.423432	0.254	0.206	7.56147e-05	VMH
Srebf1	sterol regulatory element binding transcription factor 1 [Source:MGI Symbol;Acc:MGI:107606]	3.49561e-09	0.4418	0.318	0.246	7.6865e-05	VMH
Farp1	FERM, RhoGEF (Arhgef) and pleckstrin domain protein 1 (chondrocyte-derived) [Source:MGI Symbol;Acc:MGI:2446173]	4.56111e-09	0.334947	0.552	0.501	0.000100294	VMH
Cadm4	cell adhesion molecule 4 [Source:MGI Symbol;Acc:MGI:2449088]	5.47392e-09	0.389898	0.225	0.175	0.000120366	VMH
Abr	active BCR-related gene [Source:MGI Symbol;Acc:MGI:107771]	6.19488e-09	0.355878	0.491	0.422	0.000136219	VMH
Gabrb1	gamma-aminobutyric acid (GABA) A receptor, subunit beta 1 [Source:MGI Symbol;Acc:MGI:95619]	7.18385e-09	0.359776	0.622	0.52	0.000157966	VMH
Fam20a	FAM20A, golgi associated secretory pathway pseudokinase [Source:MGI Symbol;Acc:MGI:2388266]	2.14116e-08	0.426502	0.329	0.249	0.000470819	VMH
Mtss2	MTSS I-BAR domain containing 2 [Source:MGI Symbol;Acc:MGI:3039591]	2.22784e-08	0.394635	0.343	0.269	0.000489879	VMH
Plcb1	phospholipase C, beta 1 [Source:MGI Symbol;Acc:MGI:97613]	2.43925e-08	0.412322	0.523	0.439	0.000536368	VMH
Cadm1	cell adhesion molecule 1 [Source:MGI Symbol;Acc:MGI:1889272]	4.08704e-08	0.337964	0.499	0.428	0.0008987	VMH
Slc7a10	solute carrier family 7 (cationic amino acid transporter, y+ system), member 10 [Source:MGI Symbol;Acc:MGI:1858261]	4.87742e-08	0.273362	0.736	0.685	0.0010725	VMH
Gm40578	predicted gene, 40578 [Source:MGI Symbol;Acc:MGI:5623463]	5.59097e-08	0.39841	0.25	0.193	0.0012294	VMH
Fry	FRY microtubule binding protein [Source:MGI Symbol;Acc:MGI:2443895]	6.05614e-08	0.308081	0.675	0.621	0.00133169	VMH
Bsg	basigin [Source:MGI Symbol;Acc:MGI:88208]	6.23086e-08	0.404141	0.332	0.244	0.0013701	VMH
Pla2g7	phospholipase A2, group VII (platelet-activating factor acetylhydrolase, plasma) [Source:MGI Symbol;Acc:MGI:1351327]	6.59033e-08	0.298597	0.687	0.619	0.00144915	VMH
Slc27a1	solute carrier family 27 (fatty acid transporter), member 1 [Source:MGI Symbol;Acc:MGI:1347098]	6.83353e-08	0.295387	0.605	0.539	0.00150262	VMH
Nr2f2	nuclear receptor subfamily 2, group F, member 2 [Source:MGI Symbol;Acc:MGI:1352452]	8.0106e-08	0.430846	0.153	0.086	0.00176145	VMH
Atp13a4	ATPase type 13A4 [Source:MGI Symbol;Acc:MGI:1924456]	9.71926e-08	0.334687	0.459	0.405	0.00213717	VMH
Bcan	brevican [Source:MGI Symbol;Acc:MGI:1096385]	1.03456e-07	0.250466	0.908	0.866	0.00227489	VMH
Plcd4	phospholipase C, delta 4 [Source:MGI Symbol;Acc:MGI:107469]	1.32677e-07	0.305067	0.193	0.17	0.00291745	VMH
Psd2	pleckstrin and Sec7 domain containing 2 [Source:MGI Symbol;Acc:MGI:1921252]	1.46587e-07	0.394004	0.211	0.165	0.0032233	VMH
Arrb1	arrestin, beta 1 [Source:MGI Symbol;Acc:MGI:99473]	1.62454e-07	0.400366	0.202	0.145	0.00357221	VMH
Rgs6	regulator of G-protein signaling 6 [Source:MGI Symbol;Acc:MGI:1354730]	2.2017e-07	0.416692	0.356	0.266	0.00484131	VMH
Cecr2	CECR2, histone acetyl-lysine reader [Source:MGI Symbol;Acc:MGI:1923799]	4.28905e-07	0.336823	0.163	0.131	0.00943119	VMH
Itga7	integrin alpha 7 [Source:MGI Symbol;Acc:MGI:102700]	4.53224e-07	0.362803	0.195	0.148	0.00996594	VMH
Acsl6	acyl-CoA synthetase long-chain family member 6 [Source:MGI Symbol;Acc:MGI:894291]	5.14909e-07	0.376535	0.325	0.257	0.0113223	VMH
Nebl	nebulette [Source:MGI Symbol;Acc:MGI:1921353]	5.20033e-07	0.357699	0.472	0.396	0.011435	VMH
Nebl	nebulette [Source:MGI Symbol;Acc:MGI:1921353]	0.00419815	0.350942	0.492	0.415	1	VPH
Fxyd1	FXYD domain-containing ion transport regulator 1 [Source:MGI Symbol;Acc:MGI:1889273]	6.80874e-07	0.395032	0.248	0.179	0.0149717	VMH
Aldh2	aldehyde dehydrogenase 2, mitochondrial [Source:MGI Symbol;Acc:MGI:99600]	7.56534e-07	0.338744	0.161	0.122	0.0166354	VMH
Nxn	nucleoredoxin [Source:MGI Symbol;Acc:MGI:109331]	7.92394e-07	0.344019	0.234	0.192	0.017424	VMH
Megf9	multiple EGF-like-domains 9 [Source:MGI Symbol;Acc:MGI:1918264]	9.34854e-07	0.411617	0.19	0.124	0.0205565	VMH
Gprc5b	G protein-coupled receptor, family C, group 5, member B [Source:MGI Symbol;Acc:MGI:1927596]	1.03338e-06	0.386448	0.217	0.149	0.022723	VMH
Hepacam	hepatocyte cell adhesion molecule [Source:MGI Symbol;Acc:MGI:1920177]	1.03743e-06	0.270733	0.579	0.519	0.0228121	VMH
Aldoc	aldolase C, fructose-bisphosphate [Source:MGI Symbol;Acc:MGI:101863]	1.06121e-06	0.268015	0.642	0.568	0.0233348	VMH
Cyp2j6	cytochrome P450, family 2, subfamily j, polypeptide 6 [Source:MGI Symbol;Acc:MGI:1270148]	1.36351e-06	0.3517	0.215	0.162	0.0299823	VMH
Grk3	G protein-coupled receptor kinase 3 [Source:MGI Symbol;Acc:MGI:87941]	1.51594e-06	0.284236	0.486	0.432	0.0333339	VMH
Prodh	proline dehydrogenase [Source:MGI Symbol;Acc:MGI:97770]	2.01121e-06	0.387989	0.158	0.096	0.0442245	VMH
Pabpn1	poly(A) binding protein, nuclear 1 [Source:MGI Symbol;Acc:MGI:1859158]	2.12668e-06	0.261315	0.448	0.407	0.0467636	VMH
Leng8	leukocyte receptor cluster (LRC) member 8 [Source:MGI Symbol;Acc:MGI:2142195]	2.64288e-06	0.384512	0.251	0.187	0.0581142	VMH
Nkain4	Na+/K+ transporting ATPase interacting 4 [Source:MGI Symbol;Acc:MGI:1915372]	3.19319e-06	0.3206	0.401	0.336	0.070215	VMH
Fgfr3	fibroblast growth factor receptor 3 [Source:MGI Symbol;Acc:MGI:95524]	3.31889e-06	0.250647	0.667	0.613	0.072979	VMH
Ogt	O-linked N-acetylglucosamine (GlcNAc) transferase (UDP-N-acetylglucosamine:polypeptide-N-acetylglucosaminyl transferase) [Source:MGI Symbol;Acc:MGI:1339639]	4.4e-06	0.314156	0.326	0.278	0.0967517	VMH
Asic2	acid-sensing (proton-gated) ion channel 2 [Source:MGI Symbol;Acc:MGI:1100867]	4.52881e-06	0.313051	0.207	0.177	0.0995841	VMH
Fads2	fatty acid desaturase 2 [Source:MGI Symbol;Acc:MGI:1930079]	4.73412e-06	0.253774	0.623	0.562	0.104099	VMH
Plxnb1	plexin B1 [Source:MGI Symbol;Acc:MGI:2154238]	4.97482e-06	0.301176	0.318	0.26	0.109391	VMH
Lfng	LFNG O-fucosylpeptide 3-beta-N-acetylglucosaminyltransferase [Source:MGI Symbol;Acc:MGI:1095413]	5.23881e-06	0.328061	0.364	0.295	0.115196	VMH
Wnt7b	wingless-type MMTV integration site family, member 7B [Source:MGI Symbol;Acc:MGI:98962]	7.07676e-06	0.351137	0.178	0.138	0.155611	VMH
Clasp2	CLIP associating protein 2 [Source:MGI Symbol;Acc:MGI:1923749]	1.24205e-05	0.278485	0.519	0.446	0.273115	VMH
Cdk19	cyclin-dependent kinase 19 [Source:MGI Symbol;Acc:MGI:1925584]	1.41755e-05	0.32723	0.201	0.162	0.311705	VMH
Aifm3	apoptosis-inducing factor, mitochondrion-associated 3 [Source:MGI Symbol;Acc:MGI:1919418]	1.55769e-05	0.326741	0.251	0.196	0.34252	VMH
mt-Nd3	mitochondrially encoded NADH dehydrogenase 3 [Source:MGI Symbol;Acc:MGI:102499]	1.98454e-05	0.31109	0.196	0.158	0.436381	VMH
Mapk4	mitogen-activated protein kinase 4 [Source:MGI Symbol;Acc:MGI:2444559]	2.06549e-05	0.255118	0.479	0.45	0.45418	VMH
Ddx5	DEAD box helicase 5 [Source:MGI Symbol;Acc:MGI:105037]	2.0988e-05	0.304119	0.414	0.34	0.461505	VMH
Sdc4	syndecan 4 [Source:MGI Symbol;Acc:MGI:1349164]	2.51951e-05	0.336942	0.287	0.227	0.554015	VMH
Ccnt2	cyclin T2 [Source:MGI Symbol;Acc:MGI:1920199]	2.52467e-05	0.27027	0.217	0.185	0.55515	VMH
Tef	thyrotroph embryonic factor [Source:MGI Symbol;Acc:MGI:98663]	2.74421e-05	0.251869	0.184	0.159	0.603424	VMH
Lama2	laminin, alpha 2 [Source:MGI Symbol;Acc:MGI:99912]	2.86577e-05	0.328272	0.344	0.268	0.630153	VMH
Ppp1cb	protein phosphatase 1 catalytic subunit beta [Source:MGI Symbol;Acc:MGI:104871]	3.21645e-05	0.289947	0.174	0.137	0.707265	VMH
Agpat5	1-acylglycerol-3-phosphate O-acyltransferase 5 (lysophosphatidic acid acyltransferase, epsilon) [Source:MGI Symbol;Acc:MGI:1196345]	3.64398e-05	0.279451	0.274	0.236	0.801274	VMH
Ctsd	cathepsin D [Source:MGI Symbol;Acc:MGI:88562]	3.98014e-05	0.269852	0.433	0.369	0.875194	VMH
Pgm1	phosphoglucomutase 1 [Source:MGI Symbol;Acc:MGI:97565]	4.12855e-05	0.317463	0.236	0.177	0.907827	VMH
Lrrc4b	leucine rich repeat containing 4B [Source:MGI Symbol;Acc:MGI:3027390]	5.39008e-05	0.280341	0.158	0.127	1	VMH
Csrp1	cysteine and glycine-rich protein 1 [Source:MGI Symbol;Acc:MGI:88549]	5.55942e-05	0.292539	0.266	0.227	1	VMH
Prpf19	pre-mRNA processing factor 19 [Source:MGI Symbol;Acc:MGI:106247]	5.82207e-05	0.344805	0.157	0.11	1	VMH
Cyp2j9	cytochrome P450, family 2, subfamily j, polypeptide 9 [Source:MGI Symbol;Acc:MGI:1921769]	6.81149e-05	0.330551	0.236	0.175	1	VMH
Emc1	ER membrane protein complex subunit 1 [Source:MGI Symbol;Acc:MGI:2443696]	6.97058e-05	0.339141	0.169	0.118	1	VMH
Mmp14	matrix metallopeptidase 14 (membrane-inserted) [Source:MGI Symbol;Acc:MGI:101900]	7.02708e-05	0.305267	0.253	0.207	1	VMH
Tia1	cytotoxic granule-associated RNA binding protein 1 [Source:MGI Symbol;Acc:MGI:107914]	7.23829e-05	0.266291	0.331	0.28	1	VMH
Appl2	adaptor protein, phosphotyrosine interaction, PH domain and leucine zipper containing 2 [Source:MGI Symbol;Acc:MGI:2384914]	7.60591e-05	0.297796	0.302	0.24	1	VMH
Tmem259	transmembrane protein 259 [Source:MGI Symbol;Acc:MGI:2177957]	7.66842e-05	0.305532	0.151	0.114	1	VMH
Sall2	spalt like transcription factor 2 [Source:MGI Symbol;Acc:MGI:1354373]	8.49545e-05	0.312599	0.239	0.195	1	VMH
Arid1a	AT rich interactive domain 1A (SWI-like) [Source:MGI Symbol;Acc:MGI:1935147]	0.000119366	0.296895	0.209	0.171	1	VMH
Tom1l1	target of myb1-like 1 (chicken) [Source:MGI Symbol;Acc:MGI:1919193]	0.000125304	0.2944	0.163	0.125	1	VMH
Grina	glutamate receptor, ionotropic, N-methyl D-aspartate-associated protein 1 (glutamate binding) [Source:MGI Symbol;Acc:MGI:1913418]	0.00015009	0.256365	0.296	0.263	1	VMH
Gaa	glucosidase, alpha, acid [Source:MGI Symbol;Acc:MGI:95609]	0.000156413	0.305011	0.2	0.153	1	VMH
Ip6k1	inositol hexaphosphate kinase 1 [Source:MGI Symbol;Acc:MGI:1351633]	0.000163693	0.26141	0.161	0.133	1	VMH
Ttyh2	tweety family member 2 [Source:MGI Symbol;Acc:MGI:2157091]	0.000171345	0.323021	0.171	0.12	1	VMH
Kdelr1	KDEL (Lys-Asp-Glu-Leu) endoplasmic reticulum protein retention receptor 1 [Source:MGI Symbol;Acc:MGI:1915387]	0.000173779	0.322963	0.157	0.109	1	VMH
Rab34	RAB34, member RAS oncogene family [Source:MGI Symbol;Acc:MGI:104606]	0.000183466	0.311522	0.184	0.143	1	VMH
Arxes2	adipocyte-related X-chromosome expressed sequence 2 [Source:MGI Symbol;Acc:MGI:1924226]	0.000184751	0.28475	0.32	0.268	1	VMH
Sox9	SRY (sex determining region Y)-box 9 [Source:MGI Symbol;Acc:MGI:98371]	0.000197818	0.282956	0.325	0.268	1	VMH
Cbs	cystathionine beta-synthase [Source:MGI Symbol;Acc:MGI:88285]	0.000203605	0.258229	0.217	0.191	1	VMH
Sat1	spermidine/spermine N1-acetyl transferase 1 [Source:MGI Symbol;Acc:MGI:98233]	0.000243692	0.32271	0.199	0.157	1	VMH
Scmh1	sex comb on midleg homolog 1 [Source:MGI Symbol;Acc:MGI:1352762]	0.000291708	0.262257	0.292	0.249	1	VMH
Daam2	dishevelled associated activator of morphogenesis 2 [Source:MGI Symbol;Acc:MGI:1923691]	0.000325574	0.289418	0.235	0.181	1	VMH
Smarcc2	SWI/SNF related, matrix associated, actin dependent regulator of chromatin, subfamily c, member 2 [Source:MGI Symbol;Acc:MGI:1915344]	0.000329047	0.273342	0.202	0.163	1	VMH
Sorl1	sortilin-related receptor, LDLR class A repeats-containing [Source:MGI Symbol;Acc:MGI:1202296]	0.000449246	0.253369	0.203	0.171	1	VMH
Acot11	acyl-CoA thioesterase 11 [Source:MGI Symbol;Acc:MGI:1913736]	0.000493219	0.298271	0.183	0.139	1	VMH
Efr3b	EFR3 homolog B [Source:MGI Symbol;Acc:MGI:2444851]	0.000516752	0.28333	0.24	0.194	1	VMH
Cyfip1	cytoplasmic FMR1 interacting protein 1 [Source:MGI Symbol;Acc:MGI:1338801]	0.000518811	0.258045	0.243	0.2	1	VMH
Rapgef3	Rap guanine nucleotide exchange factor (GEF) 3 [Source:MGI Symbol;Acc:MGI:2441741]	0.000589857	0.272927	0.198	0.16	1	VMH
Usp53	ubiquitin specific peptidase 53 [Source:MGI Symbol;Acc:MGI:2139607]	0.000693886	0.27159	0.151	0.122	1	VMH
Stard13	StAR-related lipid transfer (START) domain containing 13 [Source:MGI Symbol;Acc:MGI:2385331]	0.000730212	0.298798	0.2	0.157	1	VMH
Stim1	stromal interaction molecule 1 [Source:MGI Symbol;Acc:MGI:107476]	0.000814867	0.274913	0.187	0.153	1	VMH
Adgrb2	adhesion G protein-coupled receptor B2 [Source:MGI Symbol;Acc:MGI:2451244]	0.000854375	0.252561	0.223	0.192	1	VMH
Cntfr	ciliary neurotrophic factor receptor [Source:MGI Symbol;Acc:MGI:99605]	0.000879285	0.270985	0.151	0.111	1	VMH
Ivd	isovaleryl coenzyme A dehydrogenase [Source:MGI Symbol;Acc:MGI:1929242]	0.0011153	0.261802	0.216	0.17	1	VMH
Foxo1	forkhead box O1 [Source:MGI Symbol;Acc:MGI:1890077]	0.00130139	0.278399	0.195	0.167	1	VMH
Tenm3	teneurin transmembrane protein 3 [Source:MGI Symbol;Acc:MGI:1345183]	0.00135925	0.256266	0.38	0.33	1	VMH
Rhot1	ras homolog family member T1 [Source:MGI Symbol;Acc:MGI:1926078]	0.00143249	0.266815	0.151	0.115	1	VMH
Entpd2	ectonucleoside triphosphate diphosphohydrolase 2 [Source:MGI Symbol;Acc:MGI:1096863]	0.00162557	0.258447	0.231	0.198	1	VMH
Wnk2	WNK lysine deficient protein kinase 2 [Source:MGI Symbol;Acc:MGI:1922857]	0.00232502	0.282511	0.166	0.126	1	VMH
Slc20a1	solute carrier family 20, member 1 [Source:MGI Symbol;Acc:MGI:108392]	0.00274983	0.250775	0.162	0.128	1	VMH
Ctsa	cathepsin A [Source:MGI Symbol;Acc:MGI:97748]	0.00312715	0.253964	0.152	0.118	1	VMH
Dync1h1	dynein cytoplasmic 1 heavy chain 1 [Source:MGI Symbol;Acc:MGI:103147]	0.00499916	0.255427	0.16	0.119	1	VMH
Ralyl	RALY RNA binding protein-like [Source:MGI Symbol;Acc:MGI:1924147]	3.18625e-74	2.21846	0.563	0.093	7.00624e-70	VPH
Ctnna2	catenin (cadherin associated protein), alpha 2 [Source:MGI Symbol;Acc:MGI:88275]	2.74373e-12	0.741247	0.661	0.467	6.03318e-08	VPH
Gpc6	glypican 6 [Source:MGI Symbol;Acc:MGI:1346322]	1.25458e-10	0.602728	0.701	0.545	2.75869e-06	VPH
Sgip1	SH3-domain GRB2-like (endophilin) interacting protein 1 [Source:MGI Symbol;Acc:MGI:1920344]	3.70394e-09	0.705833	0.362	0.188	8.14459e-05	VPH
Wls	wntless WNT ligand secretion mediator [Source:MGI Symbol;Acc:MGI:1915401]	5.50251e-05	0.52821	0.173	0.083	1	VPH
Sntg1	syntrophin, gamma 1 [Source:MGI Symbol;Acc:MGI:1918346]	8.4284e-05	0.52969	0.161	0.076	1	VPH
Car8	carbonic anhydrase 8 [Source:MGI Symbol;Acc:MGI:88253]	0.000185538	0.440217	0.161	0.078	1	VPH
Nrp1	neuropilin 1 [Source:MGI Symbol;Acc:MGI:106206]	0.000247216	0.488479	0.335	0.239	1	VPH
Rgcc	regulator of cell cycle [Source:MGI Symbol;Acc:MGI:1913464]	0.000793663	0.45275	0.205	0.122	1	VPH
Baalc	brain and acute leukemia, cytoplasmic [Source:MGI Symbol;Acc:MGI:1928704]	0.000993061	0.452108	0.205	0.126	1	VPH
Pdzph1	PDZ and pleckstrin homology domains 1 [Source:MGI Symbol;Acc:MGI:1916489]	0.00153866	0.357403	0.169	0.096	1	VPH
Ppp2r2b	protein phosphatase 2, regulatory subunit B, beta [Source:MGI Symbol;Acc:MGI:1920180]	0.00203983	0.259477	0.843	0.764	1	VPH
Zranb1	zinc finger, RAN-binding domain containing 1 [Source:MGI Symbol;Acc:MGI:106441]	0.00292825	0.385308	0.228	0.144	1	VPH
Erc2	ELKS/RAB6-interacting/CAST family member 2 [Source:MGI Symbol;Acc:MGI:1098749]	0.00381412	0.407578	0.157	0.092	1	VPH
Ntrk3	neurotrophic tyrosine kinase, receptor, type 3 [Source:MGI Symbol;Acc:MGI:97385]	0.00395337	0.264856	0.665	0.566	1	VPH
Pfdn1	prefoldin 1 [Source:MGI Symbol;Acc:MGI:1914449]	0.00397208	0.409489	0.185	0.132	1	VPH
Swi5	SWI5 recombination repair homolog (yeast) [Source:MGI Symbol;Acc:MGI:1920181]	0.00458478	0.352552	0.193	0.118	1	VPH
Tssc4	tumor-suppressing subchromosomal transferable fragment 4 [Source:MGI Symbol;Acc:MGI:1861712]	0.00569075	0.288779	0.224	0.147	1	VPH
Nol4	nucleolar protein 4 [Source:MGI Symbol;Acc:MGI:2441684]	0.00598611	0.353686	0.303	0.216	1	VPH
Sdhb	succinate dehydrogenase complex, subunit B, iron sulfur (Ip) [Source:MGI Symbol;Acc:MGI:1914930]	0.00632592	0.274587	0.193	0.123	1	VPH
Arap2	ArfGAP with RhoGAP domain, ankyrin repeat and PH domain 2 [Source:MGI Symbol;Acc:MGI:2684416]	0.00647237	0.264479	0.547	0.445	1	VPH
Atp5o	ATP synthase, H+ transporting, mitochondrial F1 complex, O subunit [Source:MGI Symbol;Acc:MGI:106341]	0.00652863	0.316622	0.315	0.225	1	VPH
Car10	carbonic anhydrase 10 [Source:MGI Symbol;Acc:MGI:1919855]	0.00724321	0.43812	0.248	0.168	1	VPH
Fkbp2	FK506 binding protein 2 [Source:MGI Symbol;Acc:MGI:95542]	0.00819443	0.297413	0.236	0.159	1	VPH
Meis2	Meis homeobox 2 [Source:MGI Symbol;Acc:MGI:108564]	0.00854194	0.395484	0.169	0.107	1	VPH
BC031181	cDNA sequence BC031181 [Source:MGI Symbol;Acc:MGI:3039614]	0.00873359	0.304227	0.157	0.129	1	VPH

## Sheet: DEGs_Kim2020
gene	description	p_val	avg_log2FC	pct.1	pct.2	p_val_adj	class
Itih3	inter-alpha trypsin inhibitor, heavy chain 3 [Source:MGI Symbol;Acc:MGI:96620]	3.39599e-17	1.32031	0.774	0.489	7.67596e-13	ARC
Itih3	inter-alpha trypsin inhibitor, heavy chain 3 [Source:MGI Symbol;Acc:MGI:96620]	9.76976e-05	0.349288	0.558	0.484	1	LHA
Itih3	inter-alpha trypsin inhibitor, heavy chain 3 [Source:MGI Symbol;Acc:MGI:96620]	3.21166e-44	0.564571	0.788	0.45	7.2593e-40	MnPO
Gria1	glutamate receptor, ionotropic, AMPA1 (alpha 1) [Source:MGI Symbol;Acc:MGI:95808]	1.4006e-16	1.20473	0.757	0.388	3.16577e-12	ARC
Gria1	glutamate receptor, ionotropic, AMPA1 (alpha 1) [Source:MGI Symbol;Acc:MGI:95808]	7.5243e-17	0.633732	0.533	0.367	1.70072e-12	LHA
Gria1	glutamate receptor, ionotropic, AMPA1 (alpha 1) [Source:MGI Symbol;Acc:MGI:95808]	5.45692e-36	0.596734	0.66	0.357	1.23343e-31	MnPO
Gria1	glutamate receptor, ionotropic, AMPA1 (alpha 1) [Source:MGI Symbol;Acc:MGI:95808]	0.00127002	0.381007	0.417	0.4	1	PVN
Trpm3	transient receptor potential cation channel, subfamily M, member 3 [Source:MGI Symbol;Acc:MGI:2443101]	4.63531e-16	0.809957	0.957	0.685	1.04772e-11	ARC
Trpm3	transient receptor potential cation channel, subfamily M, member 3 [Source:MGI Symbol;Acc:MGI:2443101]	8.04907e-19	0.458056	0.812	0.664	1.81933e-14	LHA
Trpm3	transient receptor potential cation channel, subfamily M, member 3 [Source:MGI Symbol;Acc:MGI:2443101]	7.68817e-38	0.605419	0.915	0.657	1.73776e-33	MnPO
Trpm3	transient receptor potential cation channel, subfamily M, member 3 [Source:MGI Symbol;Acc:MGI:2443101]	7.84302e-06	0.270843	0.803	0.682	0.177276	VPH
Gabrb1	gamma-aminobutyric acid (GABA) A receptor, subunit beta 1 [Source:MGI Symbol;Acc:MGI:95619]	4.84037e-16	1.01259	0.835	0.481	1.09407e-11	ARC
Gabrb1	gamma-aminobutyric acid (GABA) A receptor, subunit beta 1 [Source:MGI Symbol;Acc:MGI:95619]	6.02735e-14	0.600895	0.588	0.468	1.36236e-09	LHA
Gabrb1	gamma-aminobutyric acid (GABA) A receptor, subunit beta 1 [Source:MGI Symbol;Acc:MGI:95619]	3.70757e-37	0.531315	0.756	0.448	8.38022e-33	MnPO
Cadm2	cell adhesion molecule 2 [Source:MGI Symbol;Acc:MGI:2442722]	3.86564e-13	0.736069	0.983	0.897	8.73751e-09	ARC
Ntm	neurotrimin [Source:MGI Symbol;Acc:MGI:2446259]	2.02539e-12	0.627767	0.983	0.915	4.578e-08	ARC
Ntm	neurotrimin [Source:MGI Symbol;Acc:MGI:2446259]	1.62428e-16	0.377016	0.952	0.908	3.67135e-12	LHA
5031439G07Rik	RIKEN cDNA 5031439G07 gene [Source:MGI Symbol;Acc:MGI:2444899]	2.59119e-11	1.13684	0.461	0.221	5.85686e-07	ARC
5031439G07Rik	RIKEN cDNA 5031439G07 gene [Source:MGI Symbol;Acc:MGI:2444899]	3.88005e-06	0.351845	0.279	0.216	0.0877007	LHA
5031439G07Rik	RIKEN cDNA 5031439G07 gene [Source:MGI Symbol;Acc:MGI:2444899]	6.7497e-33	0.510928	0.435	0.194	1.52563e-28	MnPO
5031439G07Rik	RIKEN cDNA 5031439G07 gene [Source:MGI Symbol;Acc:MGI:2444899]	0.001208	0.369472	0.255	0.227	1	PVN
Cadm1	cell adhesion molecule 1 [Source:MGI Symbol;Acc:MGI:1889272]	1.53083e-10	0.977239	0.496	0.285	3.46013e-06	ARC
Cadm1	cell adhesion molecule 1 [Source:MGI Symbol;Acc:MGI:1889272]	7.59085e-06	0.358904	0.355	0.276	0.171576	LHA
Cadm1	cell adhesion molecule 1 [Source:MGI Symbol;Acc:MGI:1889272]	9.8774e-38	0.627949	0.541	0.25	2.23259e-33	MnPO
Gpc5	glypican 5 [Source:MGI Symbol;Acc:MGI:1194894]	1.98577e-10	0.583786	0.974	0.832	4.48843e-06	ARC
Gpc5	glypican 5 [Source:MGI Symbol;Acc:MGI:1194894]	1.87485e-13	0.359197	0.887	0.824	4.23771e-09	LHA
Gpc5	glypican 5 [Source:MGI Symbol;Acc:MGI:1194894]	2.16351e-29	0.529322	0.951	0.818	4.89018e-25	MnPO
Pitpnc1	phosphatidylinositol transfer protein, cytoplasmic 1 [Source:MGI Symbol;Acc:MGI:1919045]	7.54652e-10	0.782634	0.809	0.604	1.70574e-05	ARC
Pitpnc1	phosphatidylinositol transfer protein, cytoplasmic 1 [Source:MGI Symbol;Acc:MGI:1919045]	9.48523e-09	0.389018	0.678	0.594	0.000214395	LHA
Pitpnc1	phosphatidylinositol transfer protein, cytoplasmic 1 [Source:MGI Symbol;Acc:MGI:1919045]	1.68935e-38	0.635711	0.866	0.567	3.81844e-34	MnPO
Gpld1	glycosylphosphatidylinositol specific phospholipase D1 [Source:MGI Symbol;Acc:MGI:106604]	1.12815e-09	0.973495	0.487	0.299	2.54996e-05	ARC
Gpld1	glycosylphosphatidylinositol specific phospholipase D1 [Source:MGI Symbol;Acc:MGI:106604]	0.00223916	0.262843	0.342	0.296	1	LHA
Gpld1	glycosylphosphatidylinositol specific phospholipase D1 [Source:MGI Symbol;Acc:MGI:106604]	1.52711e-33	0.447202	0.527	0.268	3.45173e-29	MnPO
Msi2	musashi RNA-binding protein 2 [Source:MGI Symbol;Acc:MGI:1923876]	1.14677e-09	0.769683	0.748	0.554	2.59205e-05	ARC
Msi2	musashi RNA-binding protein 2 [Source:MGI Symbol;Acc:MGI:1923876]	2.27501e-09	0.375973	0.637	0.54	5.14221e-05	LHA
Msi2	musashi RNA-binding protein 2 [Source:MGI Symbol;Acc:MGI:1923876]	2.64897e-23	0.284568	0.752	0.528	5.98747e-19	MnPO
Atp1a2	ATPase, Na+/K+ transporting, alpha 2 polypeptide [Source:MGI Symbol;Acc:MGI:88106]	2.77478e-09	0.554896	0.93	0.886	6.27184e-05	ARC
Atp1a2	ATPase, Na+/K+ transporting, alpha 2 polypeptide [Source:MGI Symbol;Acc:MGI:88106]	1.41689e-19	0.392034	0.968	0.874	3.2026e-15	MnPO
Lsamp	limbic system-associated membrane protein [Source:MGI Symbol;Acc:MGI:1261760]	5.43931e-09	0.50673	1	0.967	0.000122945	ARC
Lsamp	limbic system-associated membrane protein [Source:MGI Symbol;Acc:MGI:1261760]	7.35751e-16	0.291484	0.99	0.962	1.66302e-11	LHA
Lsamp	limbic system-associated membrane protein [Source:MGI Symbol;Acc:MGI:1261760]	1.12116e-16	0.318045	0.981	0.966	2.53415e-12	MnPO
Ptprd	protein tyrosine phosphatase, receptor type, D [Source:MGI Symbol;Acc:MGI:97812]	6.891e-09	0.927776	0.47	0.289	0.000155757	ARC
Ptprd	protein tyrosine phosphatase, receptor type, D [Source:MGI Symbol;Acc:MGI:97812]	1.55317e-07	0.406503	0.337	0.284	0.00351064	LHA
Lgi1	leucine-rich repeat LGI family, member 1 [Source:MGI Symbol;Acc:MGI:1861691]	1.34378e-08	0.978868	0.487	0.276	0.000303735	ARC
Lgi1	leucine-rich repeat LGI family, member 1 [Source:MGI Symbol;Acc:MGI:1861691]	2.97682e-09	0.500433	0.354	0.265	6.72851e-05	LHA
Lgi1	leucine-rich repeat LGI family, member 1 [Source:MGI Symbol;Acc:MGI:1861691]	1.74755e-35	0.430548	0.499	0.247	3.94999e-31	MnPO
Slc7a11	solute carrier family 7 (cationic amino acid transporter, y+ system), member 11 [Source:MGI Symbol;Acc:MGI:1347355]	2.33259e-08	0.963312	0.47	0.297	0.000527234	ARC
Slc7a11	solute carrier family 7 (cationic amino acid transporter, y+ system), member 11 [Source:MGI Symbol;Acc:MGI:1347355]	0.00287402	0.262411	0.339	0.294	1	LHA
Slc7a11	solute carrier family 7 (cationic amino acid transporter, y+ system), member 11 [Source:MGI Symbol;Acc:MGI:1347355]	1.04661e-18	0.291025	0.456	0.277	2.36564e-14	MnPO
Grik2	glutamate receptor, ionotropic, kainate 2 (beta 2) [Source:MGI Symbol;Acc:MGI:95815]	7.08884e-08	0.808282	0.357	0.255	0.00160229	ARC
Zfhx3	zinc finger homeobox 3 [Source:MGI Symbol;Acc:MGI:99948]	7.59016e-08	0.89639	0.209	0.106	0.0017156	ARC
Zfhx3	zinc finger homeobox 3 [Source:MGI Symbol;Acc:MGI:99948]	8.00296e-15	0.30596	0.206	0.093	1.80891e-10	MnPO
Gphn	gephyrin [Source:MGI Symbol;Acc:MGI:109602]	8.90131e-08	0.630183	0.617	0.537	0.00201196	ARC
Ntsr2	neurotensin receptor 2 [Source:MGI Symbol;Acc:MGI:108018]	1.59406e-07	0.630577	0.843	0.683	0.00360306	ARC
Ntsr2	neurotensin receptor 2 [Source:MGI Symbol;Acc:MGI:108018]	7.92279e-26	0.285977	0.881	0.656	1.79079e-21	MnPO
Ntsr2	neurotensin receptor 2 [Source:MGI Symbol;Acc:MGI:108018]	8.36579e-05	0.408504	0.787	0.682	1	PVN
Nap1l5	nucleosome assembly protein 1-like 5 [Source:MGI Symbol;Acc:MGI:1923555]	2.29603e-07	0.831024	0.2	0.067	0.00518971	ARC
Nap1l5	nucleosome assembly protein 1-like 5 [Source:MGI Symbol;Acc:MGI:1923555]	1.00373e-05	0.515645	0.162	0.065	0.226873	PVN
Erbb4	erb-b2 receptor tyrosine kinase 4 [Source:MGI Symbol;Acc:MGI:104771]	3.02536e-07	0.599144	0.826	0.791	0.00683823	ARC
Cdh20	cadherin 20 [Source:MGI Symbol;Acc:MGI:1346069]	4.27294e-07	0.782763	0.609	0.473	0.00965814	ARC
Cdh20	cadherin 20 [Source:MGI Symbol;Acc:MGI:1346069]	1.19255e-23	0.27084	0.665	0.446	2.69552e-19	MnPO
Nlgn1	neuroligin 1 [Source:MGI Symbol;Acc:MGI:2179435]	5.75705e-07	0.520622	0.904	0.83	0.0130127	ARC
Psap	prosaposin [Source:MGI Symbol;Acc:MGI:97783]	7.05216e-07	0.641741	0.687	0.609	0.01594	ARC
Psap	prosaposin [Source:MGI Symbol;Acc:MGI:97783]	0.000304616	0.406572	0.667	0.608	1	PVN
Mdga2	MAM domain containing glycosylphosphatidylinositol anchor 2 [Source:MGI Symbol;Acc:MGI:2444706]	7.35443e-07	0.570921	0.896	0.797	0.0166232	ARC
Mdga2	MAM domain containing glycosylphosphatidylinositol anchor 2 [Source:MGI Symbol;Acc:MGI:2444706]	4.30481e-14	0.396105	0.867	0.783	9.73017e-10	LHA
Mdga2	MAM domain containing glycosylphosphatidylinositol anchor 2 [Source:MGI Symbol;Acc:MGI:2444706]	2.14851e-26	0.374335	0.955	0.774	4.85628e-22	MnPO
Fam20a	FAM20A, golgi associated secretory pathway pseudokinase [Source:MGI Symbol;Acc:MGI:2388266]	1.25905e-06	0.699455	0.304	0.231	0.0284584	ARC
Fam20a	FAM20A, golgi associated secretory pathway pseudokinase [Source:MGI Symbol;Acc:MGI:2388266]	3.8944e-05	0.27939	0.26	0.227	0.880252	LHA
Fam20a	FAM20A, golgi associated secretory pathway pseudokinase [Source:MGI Symbol;Acc:MGI:2388266]	2.10518e-31	0.429468	0.423	0.202	4.75833e-27	MnPO
Ptprm	protein tyrosine phosphatase, receptor type, M [Source:MGI Symbol;Acc:MGI:102694]	1.56041e-06	0.872666	0.409	0.258	0.0352699	ARC
Dgkb	diacylglycerol kinase, beta [Source:MGI Symbol;Acc:MGI:2442474]	1.66067e-06	0.592482	0.696	0.584	0.0375362	ARC
Tmcc3	transmembrane and coiled coil domains 3 [Source:MGI Symbol;Acc:MGI:2442900]	1.85146e-06	0.730186	0.417	0.284	0.0418485	ARC
Tmcc3	transmembrane and coiled coil domains 3 [Source:MGI Symbol;Acc:MGI:2442900]	0.000952631	0.28453	0.339	0.276	1	LHA
Tmcc3	transmembrane and coiled coil domains 3 [Source:MGI Symbol;Acc:MGI:2442900]	5.3667e-15	0.296308	0.423	0.266	1.21304e-10	MnPO
St3gal4	ST3 beta-galactoside alpha-2,3-sialyltransferase 4 [Source:MGI Symbol;Acc:MGI:1316743]	1.9938e-06	0.918811	0.513	0.315	0.045066	ARC
St3gal4	ST3 beta-galactoside alpha-2,3-sialyltransferase 4 [Source:MGI Symbol;Acc:MGI:1316743]	6.89825e-08	0.480338	0.409	0.299	0.00155921	LHA
St3gal4	ST3 beta-galactoside alpha-2,3-sialyltransferase 4 [Source:MGI Symbol;Acc:MGI:1316743]	1.15828e-30	0.557987	0.548	0.283	2.61805e-26	MnPO
Atad2b	ATPase family, AAA domain containing 2B [Source:MGI Symbol;Acc:MGI:2444798]	2.13751e-06	0.793175	0.339	0.202	0.0483142	ARC
Ntrk2	neurotrophic tyrosine kinase, receptor, type 2 [Source:MGI Symbol;Acc:MGI:97384]	2.17285e-06	0.551597	0.809	0.745	0.049113	ARC
Ntrk2	neurotrophic tyrosine kinase, receptor, type 2 [Source:MGI Symbol;Acc:MGI:97384]	6.72535e-07	0.428406	0.829	0.742	0.0152013	PVN
Phka1	phosphorylase kinase alpha 1 [Source:MGI Symbol;Acc:MGI:97576]	2.55364e-06	0.818258	0.53	0.374	0.0577199	ARC
Phka1	phosphorylase kinase alpha 1 [Source:MGI Symbol;Acc:MGI:97576]	0.00106441	0.252645	0.41	0.371	1	LHA
Phka1	phosphorylase kinase alpha 1 [Source:MGI Symbol;Acc:MGI:97576]	3.63471e-31	0.395469	0.597	0.342	8.21553e-27	MnPO
Slc1a2	solute carrier family 1 (glial high affinity glutamate transporter), member 2 [Source:MGI Symbol;Acc:MGI:101931]	2.8146e-06	0.472156	0.93	0.809	0.0636183	ARC
Slc1a2	solute carrier family 1 (glial high affinity glutamate transporter), member 2 [Source:MGI Symbol;Acc:MGI:101931]	1.27801e-09	0.259152	0.887	0.794	2.88869e-05	LHA
Slc1a2	solute carrier family 1 (glial high affinity glutamate transporter), member 2 [Source:MGI Symbol;Acc:MGI:101931]	2.21499e-37	0.610591	0.96	0.789	5.00655e-33	MnPO
Phyhd1	phytanoyl-CoA dioxygenase domain containing 1 [Source:MGI Symbol;Acc:MGI:3612860]	3.07447e-06	0.797705	0.2	0.114	0.0694922	ARC
Phyhd1	phytanoyl-CoA dioxygenase domain containing 1 [Source:MGI Symbol;Acc:MGI:3612860]	1.89476e-13	0.252883	0.204	0.102	4.28272e-09	MnPO
Atp13a4	ATPase type 13A4 [Source:MGI Symbol;Acc:MGI:1924456]	3.35321e-06	0.676495	0.4	0.316	0.0757925	ARC
Cntn1	contactin 1 [Source:MGI Symbol;Acc:MGI:105980]	3.59008e-06	0.8057	0.452	0.292	0.0811465	ARC
Cntn1	contactin 1 [Source:MGI Symbol;Acc:MGI:105980]	3.95571e-05	0.346379	0.349	0.284	0.89411	LHA
Cntn1	contactin 1 [Source:MGI Symbol;Acc:MGI:105980]	2.88022e-41	0.702384	0.565	0.251	6.51015e-37	MnPO
Mbp	myelin basic protein [Source:MGI Symbol;Acc:MGI:96925]	3.87819e-06	1.84729	0.165	0.049	0.0876588	ARC
Ttll3	tubulin tyrosine ligase-like family, member 3 [Source:MGI Symbol;Acc:MGI:2141418]	4.37332e-06	0.824552	0.2	0.1	0.0988501	ARC
Adgrl3	adhesion G protein-coupled receptor L3 [Source:MGI Symbol;Acc:MGI:2441950]	4.40333e-06	0.437386	0.843	0.827	0.0995286	ARC
mt-Nd4	mitochondrially encoded NADH dehydrogenase 4 [Source:MGI Symbol;Acc:MGI:102498]	5.17291e-06	0.546125	0.913	0.791	0.116923	ARC
mt-Nd4	mitochondrially encoded NADH dehydrogenase 4 [Source:MGI Symbol;Acc:MGI:102498]	2.70705e-09	0.263225	0.87	0.776	6.11874e-05	LHA
mt-Nd4	mitochondrially encoded NADH dehydrogenase 4 [Source:MGI Symbol;Acc:MGI:102498]	1.67294e-33	0.561359	0.958	0.767	3.78135e-29	MnPO
mt-Cytb	mitochondrially encoded cytochrome b [Source:MGI Symbol;Acc:MGI:102501]	5.66923e-06	0.581969	0.922	0.834	0.128142	ARC
mt-Cytb	mitochondrially encoded cytochrome b [Source:MGI Symbol;Acc:MGI:102501]	1.12389e-31	0.515881	0.975	0.813	2.54033e-27	MnPO
mt-Cytb	mitochondrially encoded cytochrome b [Source:MGI Symbol;Acc:MGI:102501]	0.00646318	0.329377	0.875	0.834	1	PVN
Zyg11b	zyg-ll family member B, cell cycle regulator [Source:MGI Symbol;Acc:MGI:2685277]	7.74231e-06	0.654225	0.165	0.092	0.174999	ARC
Ppargc1a	peroxisome proliferative activated receptor, gamma, coactivator 1 alpha [Source:MGI Symbol;Acc:MGI:1342774]	9.40824e-06	0.531097	0.261	0.231	0.212654	ARC
[truncated: 1,442 more rows]

## Sheet: DEGs_Hajdarovic2022
gene	description	p_val	avg_log2FC	pct.1	pct.2	p_val_adj	class
[truncated: 2,345 more rows]

[truncated: 6 more sheets: DERs_Romanov2020, DERs_Kim2020, GSEA_Ziesel2018, GSEA_Romanov2020, GSEA_Kim2020, GSEA_Hajdarovic2022]
