# Supplementary material for: Molecularly stratified hypothalamic astrocytes are cellular foci for obesity
Source: Research Square preprint supplement (doi:10.21203/rs.3.rs-3748581/v1), 2024-02-09
Supplement: Supplementary file 3 [file 2a79053788b5d8b5cd140632.xlsx]

## Sheet: studies
BioProject	GEO	SRAStudy	Project	Sex	Region	NAstrocytesTrain	NAstrocytesTest	NTotalCells	Tech	NBatches	LibraryLayout	Format	PMID	EPubDate	SortFirstAuthor	LastAuthor	FullJournalName	Title	ELocationID
PRJNA847050	GSE205667	SRP379063	lutomska2022_Arc	male	Arcuate Nucleus/Median Eminence	308	826	22519	10XV3	3	PAIRED	bam	35802021	2022 Jul 8	Lutomska LM	García-Cáceres C	Glia	Diet triggers specific responses of hypothalamic astrocytes in time and region dependent manner.	doi: 10.1002/glia.24237
PRJNA815819	GSE198528	SRP363859	pool2022_MnPO	male	Median Preoptic Nucleus	456	58	3992	10XV2	1	PAIRED	fastq-dump	None	2022 Apr 27	Pool AH	Oka Y	biorxiv	Enhanced recovery of single-cell RNA-sequencing reads for missing gene expression data	doi: 10.1101/2022.04.26.489449v1
PRJNA798401	GSE193921	SRP355661	liu2022_VMHvl	female	Ventromedial hypothalamus	996	20451	95618	10XV3	16	PAIRED	fastq	34982958	2022 Jan 3	Liu M	Anderson DJ	Neuron	Make war not love: The neural substrate underlying a state-dependent switch in female social behavior.	doi: 10.1016/j.neuron.2021.12.002
PRJNA779749	GSE188646	SRP345673	hajdarovic2022_Hypoth	female	Hypothalamus	1033	5166	61194	10xv3nuclei	10	PAIRED	fastq	36285248	2022 Jul 4	Hajdarovic KH	Webb AE	Nature aging	Single-cell analysis of the aging female mouse hypothalamus.	doi: 10.1038/s43587-022-00246-4
PRJNA723345	GSE172461	SRP315601	rupp2021_MBH	NA	Mediobasal Hypothalamus	528	2785	47139	10xv3nuclei	4	PAIRED	fastq	None	2021 Dec 11	Rupp AC	Myers MG Jr	biorxiv	Leptin-mediated suppression of food intake by conserved Glp1r-expressing neurons prevents obesity	doi: 10.1101/2021.12.10.472115
PRJNA722418	GSE172204	SRP315086	affinati2021_VMH	NA	Ventromedial hypothalamus	1033	3854	46210	10xv3nuclei	9	PAIRED	fastq	34018926	2021 May 21	Affinati AH	Rupp AC	eLife	Cross-species analysis defines the conservation of anatomically segregated VMH neuron populations.	doi: 10.7554/eLife.69065
PRJNA705596	GSE167927	SRP308663	morris2021_SCN	mix	Suprachiasmatic nucleus	995	388	37141	10XV3	5	PAIRED	bam	34487375	2021 Sep 6	Morris EL	Hastings MH	The EMBO journal	Single-cell transcriptomics of suprachiasmatic nuclei reveal a Prokineticin-driven circadian network.	doi: 10.15252/embj.2021108614
PRJNA679294	GSE161751	SRP293126	lopez2021_PVN	male	Paraventricular nucleus	504	846	13016	10XV3	2	PAIRED	fastq	33571131	2021 Jan 27	Lopez JP	Chen A	Science advances	Single-cell molecular profiling of all three components of the HPA axis reveals adrenal ABCB1 as a regulator of stress adaptation.	doi: 10.1126/sciadv.abe4497
PRJNA611624	GSE146692	SRP252133	mickelsen2020_VPH	sep	Ventroposterior hypothalamus	1002	1951	49463	10XV3	4	PAIRED	fastq-dump	33119507	2020 Oct 29	Mickelsen LE	Jackson AC	eLife	Cellular taxonomy and spatial organization of the murine ventral posterior hypothalamus.	doi: 10.7554/eLife.58901
PRJNA604055	None	SRP246230	deng2020_Arc	male	Arcuate Nucleus/Median Eminence	349	37	27119	10xv3nuclei	6	PAIRED	fastq	32507042	2020 Jun 8	Deng G	Grobe JL	Hypertension (Dallas, Tex.)	Single-Nucleus RNA Sequencing of the Hypothalamic Arcuate Nucleus of C57BL/6J Mice After Prolonged Diet-Induced Obesity.	doi: 10.1161/HYPERTENSIONAHA.120.15137
PRJNA548917	GSE132730	SRP201462	romanov2020_Hypoth-dev	mix	Hypothalamus	1006	2036	14895	10XV2	15	PAIRED	fastq-dump	32499648	2020 May 6	Romanov RA	Harkany T	Nature	Molecular design of hypothalamus development.	doi: 10.1038/s41586-020-2266-0
PRJNA548532	GSE132608	SRP201224	wen2020_SCN	male	Suprachiasmatic nucleus	1030	5119	23042	10XV2	2	PAIRED	fastq-dump	32066983	2020 Feb 17	Wen S	Yan J	Nature neuroscience	Spatiotemporal single-cell analysis of gene expression in the mouse suprachiasmatic nucleus.	doi: 10.1038/s41593-020-0586-x
PRJNA547712	GSE132355	SRP200721	kim2020_Hypoth-dev	mix	Hypothalamus	1014	2201	39523	10XV2	25	PAIRED	bam	32868762	2020 Aug 31	Kim DW	Blackshaw S	Nature communications	The cellular and molecular landscape of hypothalamic patterning and differentiation from embryonic to late postnatal development.	doi: 10.1038/s41467-020-18231-z
PRJNA515063	GSE125065	SRP179101	mickelsen2019_LHA	sep	Lateral hypothalamic area	1001	406	13552	10XV2	2	PAIRED	fastq-dump	30858605	2019 Mar 11	Mickelsen LE	Jackson AC	Nature neuroscience	Single-cell transcriptomic analysis of the lateral hypothalamic area reveals molecularly distinct populations of inhibitory and excitatory neurons.	doi: 10.1038/s41593-019-0349-8
PRJNA453138	GSE113576	SRP142447	moffitt2018_POA	sep	Preoptic area	1005	1706	44895	10XV2	6	PAIRED	bam	30385464	2018 Nov 1	Moffitt JR	Zhuang X	Science (New York, N.Y.)	Molecular, spatial, and functional single-cell profiling of the hypothalamic preoptic region.	doi: 10.1126/science.aau5324
PRJNA438862	None	SRP135960	zeisel2018_Hypoth-brain	sep	Hypothalamus	1020	3293	44121	10XV1	11	PAIRED	bam	30096314	2018 Aug 9	Zeisel A	Linnarsson S	Cell	Molecular Architecture of the Mouse Nervous System.	doi: 10.1016/j.cell.2018.06.021
Total number of astrocytes:		73290

## Sheet: hypothalamus
Run	Condition	LibraryName	LibraryStrategy	Model	SRAStudy	BioProject	Project	LibBatch	ExpBatch	AgeGroup	Sex	Region	NAstrocytesTrain	NAstrocytesTest	NTotalCells	NTotalDropletsIncluded	Tech	NExpectedDoubletRate
SRR19578589	1	hfd	RNA-Seq	Illumina NovaSeq 6000	SRP379063	PRJNA847050	lutomska2022_Arc		hfd_15	Young	male	ARC	0	1547	8467	20000	10XV3	0.064560875
SRR19578590	1	hfd	RNA-Seq	Illumina NovaSeq 6000	SRP379063	PRJNA847050	lutomska2022_Arc		hfd_05	Young	male	ARC	0	1070	6434	20000	10XV3	0.049327333333333334
SRR19578591	0	control	RNA-Seq	Illumina NovaSeq 6000	SRP379063	PRJNA847050	lutomska2022_Arc		control	Young	male	ARC	308	826	7618	20000	10XV3	0.05808725
SRR18316211	0	control	RNA-Seq	Illumina HiSeq 4000	SRP363859	PRJNA815819	pool2022_MnPO			Young	male	MnPO	456	58	3992	20000	10XV2	0.030938
SRR17655997	0	lactating	RNA-Seq	Illumina NovaSeq 6000	SRP355661	PRJNA798401	liu2022_VMHvl		A	Young	female	VMH	160	3045	19207	70000	10XV3	0.1459732
SRR17656000	0	lactating	RNA-Seq	Illumina NovaSeq 6000	SRP355661	PRJNA798401	liu2022_VMHvl		A	Young	female	VMH	142	3263	14251	40000	10XV3	0.1083076
SRR17656004	0	virgin	RNA-Seq	Illumina NovaSeq 6000	SRP355661	PRJNA798401	liu2022_VMHvl		B	Young	female	VMH	183	3556	17265	65000	10XV3	0.131214
SRR17656006	0	virgin	RNA-Seq	Illumina NovaSeq 6000	SRP355661	PRJNA798401	liu2022_VMHvl		B	Young	female	VMH	154	3143	15335	74000	10XV3	0.116546
SRR17656011	0	post-lactating	RNA-Seq	Illumina NovaSeq 6000	SRP355661	PRJNA798401	liu2022_VMHvl		C	Young	female	VMH	222	4338	17150	60000	10XV3	0.13034
SRR17656012	0	post-lactating	RNA-Seq	HiSeq X Ten	SRP355661	PRJNA798401	liu2022_VMHvl		C	Young	female	VMH	135	3106	12410	55000	10XV3	0.094316
SRR16922352	0	control	RNA-Seq	Illumina HiSeq 2000	SRP345673	PRJNA779749	hajdarovic2022_Hypoth			Young	female	Hypoth	360	83	2006	10000	10xv3nuclei	0.016048
SRR16922353	0	control	RNA-Seq	Illumina HiSeq 2000	SRP345673	PRJNA779749	hajdarovic2022_Hypoth			Young	female	Hypoth	740	155	7938	20000	10xv3nuclei	0.06052725
SRR16922354	0	control	RNA-Seq	Illumina HiSeq 2000	SRP345673	PRJNA779749	hajdarovic2022_Hypoth			Young	female	Hypoth	756	147	8002	20000	10xv3nuclei	0.06101525
SRR16922355	0	control	RNA-Seq	Illumina NovaSeq 6000	SRP345673	PRJNA779749	hajdarovic2022_Hypoth			Young	female	Hypoth	282	63	3797	10000	10xv3nuclei	0.02942675
SRR16922356	0	control	RNA-Seq	Illumina NovaSeq 6000	SRP345673	PRJNA779749	hajdarovic2022_Hypoth			Young	female	Hypoth	362	67	4873	20000	10xv3nuclei	0.0380094
SRR16922357	0	control	RNA-Seq	Illumina HiSeq 2000	SRP345673	PRJNA779749	hajdarovic2022_Hypoth			Aged	female	Hypoth	645	117	8143	50000	10xv3nuclei	0.062090374999999996
SRR16922358	0	control	RNA-Seq	Illumina HiSeq 2000	SRP345673	PRJNA779749	hajdarovic2022_Hypoth			Aged	female	Hypoth	630	134	8193	50000	10xv3nuclei	0.062471624999999996
SRR16922359	0	control	RNA-Seq	Illumina HiSeq 2000	SRP345673	PRJNA779749	hajdarovic2022_Hypoth			Aged	female	Hypoth	756	130	9198	30000	10xv3nuclei	0.07051800000000001
SRR16922360	0	control	RNA-Seq	Illumina NovaSeq 6000	SRP345673	PRJNA779749	hajdarovic2022_Hypoth			Aged	female	Hypoth	69	326	4413	15000	10xv3nuclei	0.03420075
SRR16922361	0	control	RNA-Seq	Illumina NovaSeq 6000	SRP345673	PRJNA779749	hajdarovic2022_Hypoth			Aged	female	Hypoth	68	309	4631	20000	10xv3nuclei	0.0361218
SRR14289035	0	control	RNA-Seq	Illumina NovaSeq 6000	SRP315601	PRJNA723345	rupp2021_MBH		A	Young	NA	MBH	1483	296	10550	30000	10xv3nuclei	0.08018
SRR14289036	1	Insulin	RNA-Seq	Illumina NovaSeq 6000	SRP315601	PRJNA723345	rupp2021_MBH		A	Young	NA	MBH	0	1445	9255	30000	10xv3nuclei	0.070955
SRR14289037	0	control	RNA-Seq	Illumina NovaSeq 6000	SRP315601	PRJNA723345	rupp2021_MBH		B	Young	NA	MBH	1302	232	15797	30000	10xv3nuclei	0.1200572
SRR14289038	1	Insulin	RNA-Seq	Illumina NovaSeq 6000	SRP315601	PRJNA723345	rupp2021_MBH		B	Young	NA	MBH	0	1780	11537	30000	10xv3nuclei	0.0876812
SRR14252354	0	control	RNA-Seq	Illumina NovaSeq 6000	SRP315086	PRJNA722418	affinati2021_VMH			Young	NA	VMH	197	676	13458	30000	10xv3nuclei	0.1022808
SRR14252355	0	control	RNA-Seq	Illumina HiSeq 2500	SRP315086	PRJNA722418	affinati2021_VMH			Young	NA	VMH	94	346	2808	20000	10xv3nuclei	0.021528000000000002
SRR14252356	0	control	RNA-Seq	Illumina HiSeq 2500	SRP315086	PRJNA722418	affinati2021_VMH			Young	NA	VMH	180	676	5000	30000	10xv3nuclei	0.039
SRR14252357	0	control	RNA-Seq	Illumina HiSeq 2500	SRP315086	PRJNA722418	affinati2021_VMH			Young	NA	VMH	36	143	2428	10000	10xv3nuclei	0.019424
SRR14252358	0	control	RNA-Seq	Illumina HiSeq 2500	SRP315086	PRJNA722418	affinati2021_VMH			Young	NA	VMH	53	209	2531	10000	10xv3nuclei	0.019404333333333336
SRR14252359	0	control	RNA-Seq	Illumina HiSeq 2500	SRP315086	PRJNA722418	affinati2021_VMH			Young	NA	VMH	132	525	3880	10000	10xv3nuclei	0.030070000000000003
SRR14252360	0	control	RNA-Seq	Illumina HiSeq 2500	SRP315086	PRJNA722418	affinati2021_VMH			Young	NA	VMH	63	268	3125	10000	10xv3nuclei	0.023958333333333335
SRR14252362	0	control	RNA-Seq	Illumina HiSeq 2500	SRP315086	PRJNA722418	affinati2021_VMH			Young	NA	VMH	135	505	6622	60000	10xv3nuclei	0.051084
SRR14252363	0	control	RNA-Seq	Illumina HiSeq 2500	SRP315086	PRJNA722418	affinati2021_VMH			Young	NA	VMH	143	506	6358	40000	10xv3nuclei	0.04874466666666667
SRR13811017	0	P10	RNA-Seq	Illumina HiSeq 4000	SRP308663	PRJNA705596	morris2021_SCN			Juvenile	mix	SCN	40	13	3743	10000	10XV3	0.029008250000000003
SRR13811018	0	P10	RNA-Seq	Illumina HiSeq 4000	SRP308663	PRJNA705596	morris2021_SCN			Juvenile	mix	SCN	152	60	7403	20000	10XV3	0.05710885714285714
SRR13811019	0	P10	RNA-Seq	Illumina HiSeq 4000	SRP308663	PRJNA705596	morris2021_SCN			Juvenile	mix	SCN	164	67	5156	20000	10XV3	0.0402168
SRR13811020	0	P10	RNA-Seq	Illumina HiSeq 4000	SRP308663	PRJNA705596	morris2021_SCN			Juvenile	mix	SCN	321	112	6121	20000	10XV3	0.04692766666666667
SRR13811021	0	P10	RNA-Seq	Illumina HiSeq 4000	SRP308663	PRJNA705596	morris2021_SCN			Juvenile	mix	SCN	318	136	14718	30000	10XV3	0.1118568
SRR13081815	0	control	RNA-Seq	Illumina HiSeq 4000	SRP293126	PRJNA679294	lopez2021_PVN			Young	male	PVN	504	846	6835	15000	10XV3	0.052727142857142854
SRR13081816	1	csds	RNA-Seq	Illumina HiSeq 4000	SRP293126	PRJNA679294	lopez2021_PVN			Young	male	PVN	0	1412	6181	15000	10XV3	0.04738766666666667
SRR11278029	0	control	RNA-Seq	Illumina HiSeq 4000	SRP252133	PRJNA611624	mickelsen2020_VPH		A	Young	male	VPH	349	635	11460	40000	10XV2	0.087096
SRR11278030	0	control	RNA-Seq	Illumina HiSeq 4000	SRP252133	PRJNA611624	mickelsen2020_VPH		A	Young	female	VPH	206	423	9729	30000	10XV2	0.0739404
SRR11278031	0	control	RNA-Seq	Illumina NovaSeq 6000	SRP252133	PRJNA611624	mickelsen2020_VPH		B	Young	female	VPH	208	411	13040	40000	10XV3	0.099104
SRR11278032	0	control	RNA-Seq	Illumina NovaSeq 6000	SRP252133	PRJNA611624	mickelsen2020_VPH		B	Young	male	VPH	239	482	15234	40000	10XV3	0.1157784
SRR10992871	1	hfd	RNA-Seq	Illumina HiSeq 4000	SRP246230	PRJNA604055	deng2020_Arc			Young	male	ARC	0	171	5987	20000	10xv3nuclei	0.045900333333333335
SRR10992872	1	hfd	RNA-Seq	Illumina HiSeq 4000	SRP246230	PRJNA604055	deng2020_Arc			Young	male	ARC	0	131	2891	10000	10xv3nuclei	0.022164333333333334
SRR10992873	0	control	RNA-Seq	Illumina HiSeq 4000	SRP246230	PRJNA604055	deng2020_Arc			Young	male	ARC	21	3	1480	10000	10xv3nuclei	0.01184
SRR10992874	0	control	RNA-Seq	Illumina HiSeq 4000	SRP246230	PRJNA604055	deng2020_Arc			Young	male	ARC	79	10	4025	20000	10xv3nuclei	0.031193750000000003
SRR10992875	1	hfd	RNA-Seq	Illumina HiSeq 4000	SRP246230	PRJNA604055	deng2020_Arc			Young	male	ARC	0	244	7044	20000	10xv3nuclei	0.054339428571428566
SRR10992876	0	control	RNA-Seq	Illumina HiSeq 4000	SRP246230	PRJNA604055	deng2020_Arc			Young	male	ARC	249	24	5692	20000	10xv3nuclei	0.04363866666666667
SRR9303102	0	P10	RNA-Seq	Illumina HiSeq 4000	SRP201462	PRJNA548917	romanov2020_Hypoth-dev		A	Juvenile	mix	Hypoth	344	654	6195	10000	10XV2	0.047495
SRR9303103	0	P10	RNA-Seq	Illumina HiSeq 4000	SRP201462	PRJNA548917	romanov2020_Hypoth-dev		B	Juvenile	mix	Hypoth	304	645	5448	10000	10XV2	0.0425
SRR9303105	0	P23	RNA-Seq	Illumina HiSeq 4000	SRP201462	PRJNA548917	romanov2020_Hypoth-dev		B	Young	mix	Hypoth	358	737	3252	5000	10XV2	0.0249
SRR9280653	0	control	RNA-Seq	HiSeq X Ten	SRP201224	PRJNA548532	wen2020_SCN		constant dark	Young	male	SCN	529	2549	11520	20000	10XV2	0.087552
SRR9280654	0	control	RNA-Seq	HiSeq X Ten	SRP201224	PRJNA548532	wen2020_SCN		constant dark	Young	male	SCN	501	2570	11522	20000	10XV2	0.0875672
SRR9214101	0	P08	RNA-Seq	NextSeq 500	SRP200721	PRJNA547712	kim2020_Hypoth-dev		CD1	Juvenile	mix	Hypoth	470	1001	6458	15000	10XV2	0.04951133333333334
SRR9214102	0	P14	RNA-Seq	NextSeq 500	SRP200721	PRJNA547712	kim2020_Hypoth-dev		CD1	Juvenile	mix	Hypoth	148	349	6744	15000	10XV2	0.05202514285714285
SRR9214103	0	P45	RNA-Seq	NextSeq 500	SRP200721	PRJNA547712	kim2020_Hypoth-dev		C57BL/6J	Young	mix	Hypoth	142	304	15587	20000	10XV2	0.1184612
SRR9214104	0	P45	RNA-Seq	NextSeq 500	SRP200721	PRJNA547712	kim2020_Hypoth-dev		C57BL/6J	Young	mix	Hypoth	254	547	10734	20000	10XV2	0.0815784
SRR8441476	0	control	RNA-Seq	Illumina HiSeq 4000	SRP179101	PRJNA515063	mickelsen2019_LHA	3	A	Young	male	LHA	465	187	6738	30000	10XV2	0.05197885714285714
SRR8441477	0	control	RNA-Seq	Illumina HiSeq 4000	SRP179101	PRJNA515063	mickelsen2019_LHA	2	B	Young	female	LHA	536	219	6814	30000	10XV2	0.05256514285714285
SRR7059018	0	control	RNA-Seq	NextSeq 500	SRP142447	PRJNA453138	moffitt2018_POA		A	Young	female	POA	110	158	6179	20000	10XV2	0.047372333333333336
SRR7059019	0	control	RNA-Seq	NextSeq 500	SRP142447	PRJNA453138	moffitt2018_POA		A	Young	female	POA	225	388	13254	30000	10XV2	0.1007304
SRR7059020	0	control	RNA-Seq	NextSeq 500	SRP142447	PRJNA453138	moffitt2018_POA		A	Young	female	POA	30	36	512	800	10XV2	0.004096
SRR7059021	0	control	RNA-Seq	NextSeq 500	SRP142447	PRJNA453138	moffitt2018_POA		A	Young	male	POA	264	482	11584	20000	10XV2	0.0880384
SRR7059022	0	control	RNA-Seq	NextSeq 500	SRP142447	PRJNA453138	moffitt2018_POA		A	Young	male	POA	296	521	10631	20000	10XV2	0.0807956
SRR7059023	0	control	RNA-Seq	NextSeq 500	SRP142447	PRJNA453138	moffitt2018_POA		A	Young	male	POA	80	121	2735	10000	10XV2	0.020968333333333335
SRR6854065	0	control	RNA-Seq	Illumina HiSeq 2500	SRP135960	PRJNA438862	zeisel2018_Hypoth-brain	10X86_3	G	Young	missing	Hypoth	308	826	2736	4000	10XV1	0.020976
SRR6854066	0	control	RNA-Seq	Illumina HiSeq 2500	SRP135960	PRJNA438862	zeisel2018_Hypoth-brain	10X86_1	G	Young	missing	Hypoth	0	2	1975	3000	10XV1	0.015799999999999998
SRR6854077	0	control	RNA-Seq	Illumina HiSeq 2500	SRP135960	PRJNA438862	zeisel2018_Hypoth-brain	10X57_1	F	Young	male	Hypoth	117	392	5720	8000	10XV1	0.043853333333333334
SRR6854080	0	control	RNA-Seq	Illumina HiSeq 2500	SRP135960	PRJNA438862	zeisel2018_Hypoth-brain	10X56_6	E	Young	male	Hypoth	66	197	4550	7500	10XV1	0.03549
SRR6854090	0	control	RNA-Seq	Illumina HiSeq 2500	SRP135960	PRJNA438862	zeisel2018_Hypoth-brain	10X06_3	A	Young	male	Hypoth	42	95	2690	5000	10XV1	0.020623333333333334
SRR6854135	0	control	RNA-Seq	Illumina HiSeq 2500	SRP135960	PRJNA438862	zeisel2018_Hypoth-brain	10X51_3	D	Young	female	Hypoth	139	452	4233	6000	10XV1	0.03280575
SRR6854136	0	control	RNA-Seq	Illumina HiSeq 2500	SRP135960	PRJNA438862	zeisel2018_Hypoth-brain	10X51_4	D	Young	female	Hypoth	148	477	5141	7000	10XV1	0.0400998
SRR6854141	0	control	RNA-Seq	Illumina HiSeq 2500	SRP135960	PRJNA438862	zeisel2018_Hypoth-brain	10X50_3	C	Young	female	Hypoth	149	511	3620	6000	10XV1	0.028055
SRR6854142	0	control	RNA-Seq	Illumina HiSeq 2500	SRP135960	PRJNA438862	zeisel2018_Hypoth-brain	10X50_4	C	Young	female	Hypoth	298	979	6374	10000	10XV1	0.04886733333333334
SRR6854157	0	control	RNA-Seq	Illumina HiSeq 2500	SRP135960	PRJNA438862	zeisel2018_Hypoth-brain	10X35_3	B	Young	female	Hypoth	45	153	2940	5000	10XV1	0.02254
SRR6854160	0	control	RNA-Seq	Illumina HiSeq 2500	SRP135960	PRJNA438862	zeisel2018_Hypoth-brain	10X35_4	B	Young	female	Hypoth	1	3	4142	6000	10XV1	0.032100500000000004

## Sheet: Paramspace
whole_hypothalamus	subregions	fpr
PRJNA779749	PRJNA847050	0.001
PRJNA548917	PRJNA815819	0.01
PRJNA547712	PRJNA798401	nc
PRJNA438862	PRJNA723345
	PRJNA722418
	PRJNA705596
	PRJNA679294
	PRJNA611624
	PRJNA604055
	PRJNA548532
	PRJNA515063
	PRJNA453138

## Sheet: PRJNA438862
Run	Age	Assay Type	AssemblyName	AvgSpotLen	Bases	BioProject	BioSample	BioSampleModel	Bytes	cell_index	Center Name	Consent	DATASTORE filetype	DATASTORE provider	DATASTORE region	Experiment	Instrument	Library Name	LibraryLayout	LibrarySelection	LibrarySource	Organism	Platform	ReleaseDate	Sample Name	sex	SRA Study	Strain	Tissue	Isolate
SRR6877265	p20	RNA-Seq	GCF_000001635.20	98	18362329090	PRJNA438862	SAMN08771080	Model organism or animal	6891753007	SI-3A-G10	KAROLINSKA INSTITUTE	public	TenX,sra	s3	s3.us-east-1	SRX3830113	Illumina HiSeq 2500	10X52_7	SINGLE	Oligo-dT	TRANSCRIPTOMIC	Mus musculus	ILLUMINA	2018-04-04T00:00:00Z	10X52_7	male	SRP135960	CD-1	ventral midbrain	Ad26
SRR6854051	p20	RNA-Seq	GCF_000001635.20	98	17518043998	PRJNA438862	SAMN08730911	Model organism or animal	5210246754	SI-3A-B11	KAROLINSKA INSTITUTE	public	sra,TenX	s3	s3.us-east-1	SRX3809399	Illumina HiSeq 2500	10X33_4	SINGLE	Oligo-dT	TRANSCRIPTOMIC	Mus musculus	ILLUMINA	2018-04-04T00:00:00Z	10X33_4	pooled male and female	SRP135960	CD-1	Pons	Ad15\, Ad16
SRR6854052	p21	RNA-Seq	GCF_000001635.20	98	16727094916	PRJNA438862	SAMN08730912	Model organism or animal	5434431440	SI-3A-E4	KAROLINSKA INSTITUTE	public	sra,TenX	s3	s3.us-east-1	SRX3809398	Illumina HiSeq 2500	10X34_1	SINGLE	Oligo-dT	TRANSCRIPTOMIC	Mus musculus	ILLUMINA	2018-04-04T00:00:00Z	10X34_1	female	SRP135960	CD-1	Amygdala	Ad17
SRR6854053	p25	RNA-Seq	GCF_000001635.20	98	15684727324	PRJNA438862	SAMN08730903	Model organism or animal	5769743210	SI-3A-D8	KAROLINSKA INSTITUTE	public	sra,TenX	s3	s3.us-east-1	SRX3809397	Illumina HiSeq 2500	10X26_4	SINGLE	Oligo-dT	TRANSCRIPTOMIC	Mus musculus	ILLUMINA	2018-04-04T00:00:00Z	10X26_4	female	SRP135960	CD-1	StriatumVentral	Ad13
SRR6854054	p26	RNA-Seq	GCF_000001635.20	98	16533822452	PRJNA438862	SAMN08730904	Model organism or animal	5932234426	SI-3A-E8	KAROLINSKA INSTITUTE	public	sra,TenX	s3	s3.us-east-1	SRX3809396	Illumina HiSeq 2500	10X28_2	SINGLE	Oligo-dT	TRANSCRIPTOMIC	Mus musculus	ILLUMINA	2018-04-04T00:00:00Z	10X28_2	male	SRP135960	CD-1	Ctx3	Ad14
SRR6854055	p26	RNA-Seq	GCF_000001635.20	98	15903260366	PRJNA438862	SAMN08730905	Model organism or animal	5721774506	SI-3A-F8	KAROLINSKA INSTITUTE	public	TenX,sra	s3	s3.us-east-1	SRX3809395	Illumina HiSeq 2500	10X28_3	SINGLE	Oligo-dT	TRANSCRIPTOMIC	Mus musculus	ILLUMINA	2018-04-04T00:00:00Z	10X28_3	male	SRP135960	CD-1	Ctx3	Ad14
SRR6854056	p26	RNA-Seq	GCF_000001635.20	98	15571817212	PRJNA438862	SAMN08730906	Model organism or animal	5611700918	SI-3A-G8	KAROLINSKA INSTITUTE	public	TenX,sra	s3	s3.us-east-1	SRX3809394	Illumina HiSeq 2500	10X28_4	SINGLE	Oligo-dT	TRANSCRIPTOMIC	Mus musculus	ILLUMINA	2018-04-04T00:00:00Z	10X28_4	male	SRP135960	CD-1	OB	Ad14
SRR6854057	p26	RNA-Seq	GCF_000001635.20	98	15771004368	PRJNA438862	SAMN08730907	Model organism or animal	5927068508	SI-3A-H8	KAROLINSKA INSTITUTE	public	sra,TenX	s3	s3.us-east-1	SRX3809393	Illumina HiSeq 2500	10X28_5	SINGLE	Oligo-dT	TRANSCRIPTOMIC	Mus musculus	ILLUMINA	2018-04-04T00:00:00Z	10X28_5	male	SRP135960	CD-1	OB	Ad14
SRR6854058	p20	RNA-Seq	GCF_000001635.20	98	17292642822	PRJNA438862	SAMN08730908	Model organism or animal	5683936084	SI-3A-G10	KAROLINSKA INSTITUTE	public	sra,TenX	s3	s3.us-east-1	SRX3809392	Illumina HiSeq 2500	10X33_1	SINGLE	Oligo-dT	TRANSCRIPTOMIC	Mus musculus	ILLUMINA	2018-04-04T00:00:00Z	10X33_1	pooled male and female	SRP135960	CD-1	Medulla	Ad15\, Ad16
SRR6854059	p20	RNA-Seq	GCF_000001635.20	98	17409840728	PRJNA438862	SAMN08730909	Model organism or animal	6009682493	SI-3A-H10	KAROLINSKA INSTITUTE	public	sra,TenX	s3	s3.us-east-1	SRX3809391	Illumina HiSeq 2500	10X33_2	SINGLE	Oligo-dT	TRANSCRIPTOMIC	Mus musculus	ILLUMINA	2018-04-04T00:00:00Z	10X33_2	pooled male and female	SRP135960	CD-1	Medulla	Ad15\, Ad16
SRR6854060	p20	RNA-Seq	GCF_000001635.20	98	16934767794	PRJNA438862	SAMN08730910	Model organism or animal	5343360768	SI-3A-A11	KAROLINSKA INSTITUTE	public	TenX,sra	s3	s3.us-east-1	SRX3809390	Illumina HiSeq 2500	10X33_3	SINGLE	Oligo-dT	TRANSCRIPTOMIC	Mus musculus	ILLUMINA	2018-04-04T00:00:00Z	10X33_3	pooled male and female	SRP135960	CD-1	Pons	Ad15\, Ad16
SRR6854061	p19\, p21	RNA-Seq	GCF_000001635.20	98	16028465852	PRJNA438862	SAMN08730996	Model organism or animal	6422676564	SI-GA-D5	KAROLINSKA INSTITUTE	public	sra,TenX	s3	s3.us-east-1	SRX3809389	Illumina HiSeq 2500	10X81_2	SINGLE	PolyA	TRANSCRIPTOMIC	Mus musculus	ILLUMINA	2018-04-04T00:00:00Z	10X81_2	pooled male and female	SRP135960	Wnt1Cre-R26Rtomato-C57BL/6J	ENS
SRR6854062	p19\, p21	RNA-Seq	GCF_000001635.20	98	19659015894	PRJNA438862	SAMN08730995	Model organism or animal	8014132055	SI-GA-C5	KAROLINSKA INSTITUTE	public	sra,TenX	s3	s3.us-east-1	SRX3809388	Illumina HiSeq 2500	10X81_1	SINGLE	PolyA	TRANSCRIPTOMIC	Mus musculus	ILLUMINA	2018-04-04T00:00:00Z	10X81_1	pooled male and female	SRP135960	Wnt1Cre-R26Rtomato-C57BL/6J	ENS
SRR6854063	6w	RNA-Seq	GCF_000001635.20	98	17055728410	PRJNA438862	SAMN08730994	Model organism or animal	6242072178	SI-3A-A8	KAROLINSKA INSTITUTE	public	TenX,sra	s3	s3.us-east-1	SRX3809387	Illumina HiSeq 2500	10X75_1	SINGLE	Oligo-dT	TRANSCRIPTOMIC	Mus musculus	ILLUMINA	2018-04-04T00:00:00Z	10X75_1	missing	SRP135960	CD-1	Sympath	SYMP1
SRR6854064	p25-27	RNA-Seq	GCF_000001635.20	98	17825559178	PRJNA438862	SAMN08730993	Model organism or animal	6987179407	SI-3A-D2	KAROLINSKA INSTITUTE	public	sra,TenX	s3	s3.us-east-1	SRX3809386	Illumina HiSeq 2500	10X57_7	SINGLE	Oligo-dT	TRANSCRIPTOMIC	Mus musculus	ILLUMINA	2018-04-04T00:00:00Z	10X57_7	pooled male and female	SRP135960	Swiss	Thalamus	Ad33\, Ad34
SRR6854065	p19	RNA-Seq	GCF_000001635.20	98	9030775362	PRJNA438862	SAMN08731000	Model organism or animal	3364742483	SI-3A-A1	KAROLINSKA INSTITUTE	public	sra,TenX	s3	s3.us-east-1	SRX3809385	Illumina HiSeq 2500	10X86_3	SINGLE	Oligo-dT	TRANSCRIPTOMIC	Mus musculus	ILLUMINA	2018-04-04T00:00:00Z	10X86_3	missing	SRP135960	missing	Hypothalamus	Ad36
SRR6854066	p19	RNA-Seq	GCF_000001635.20	98	6483252328	PRJNA438862	SAMN08730999	Model organism or animal	2108837979	SI-3A-A3	KAROLINSKA INSTITUTE	public	TenX,sra	s3	s3.us-east-1	SRX3809384	Illumina HiSeq 2500	10X86_1	SINGLE	Oligo-dT	TRANSCRIPTOMIC	Mus musculus	ILLUMINA	2018-04-04T00:00:00Z	10X86_1	missing	SRP135960	missing	Hypothalamus
SRR6854067	p21\, p23	RNA-Seq	GCF_000001635.20	98	18273366944	PRJNA438862	SAMN08730998	Model organism or animal	7253872856	SI-GA-G5	KAROLINSKA INSTITUTE	public	TenX,sra	s3	s3.us-east-1	SRX3809383	Illumina HiSeq 2500	10X82_2	SINGLE	PolyA	TRANSCRIPTOMIC	Mus musculus	ILLUMINA	2018-04-04T00:00:00Z	10X82_2	pooled male and female	SRP135960	Wnt1Cre-R26Rtomato-C57BL/6J	ENS
SRR6854068	p19\, p21	RNA-Seq	GCF_000001635.20	98	23040021872	PRJNA438862	SAMN08730997	Model organism or animal	8836491925	SI-GA-E5	KAROLINSKA INSTITUTE	public	sra,TenX	s3	s3.us-east-1	SRX3809382	Illumina HiSeq 2500	10X81_3	SINGLE	PolyA	TRANSCRIPTOMIC	Mus musculus	ILLUMINA	2018-04-04T00:00:00Z	10X81_3	pooled male and female	SRP135960	Wnt1Cre-R26Rtomato-C57BL/6J	ENS
SRR6854069	p21	RNA-Seq	GCF_000001635.20	98	6983863278	PRJNA438862	SAMN08731002	Model organism or animal	2759640646	SI-3A-D1	KAROLINSKA INSTITUTE	public	TenX,sra	s3	s3.us-east-1	SRX3809381	Illumina HiSeq 2500	10X87_2	SINGLE	Oligo-dT	TRANSCRIPTOMIC	Mus musculus	ILLUMINA	2018-04-04T00:00:00Z	10X87_2	missing	SRP135960	missing	Amygdala	Ad37\,Ad38
SRR6854070	p21	RNA-Seq	GCF_000001635.20	98	6051107020	PRJNA438862	SAMN08731001	Model organism or animal	2413478880	SI-3A-C1	KAROLINSKA INSTITUTE	public	sra,TenX	s3	s3.us-east-1	SRX3809380	Illumina HiSeq 2500	10X87_1	SINGLE	Oligo-dT	TRANSCRIPTOMIC	Mus musculus	ILLUMINA	2018-04-04T00:00:00Z	10X87_1	missing	SRP135960	missing	Amygdala	Ad37\,Ad38
SRR6854071	p28	RNA-Seq	GCF_000001635.20	98	29327276258	PRJNA438862	SAMN08730873	Model organism or animal	10781540517	SI-3A-A1	KAROLINSKA INSTITUTE	public	sra,TenX	s3	s3.us-east-1	SRX3809379	Illumina HiSeq 2500	10X01_1	SINGLE	Oligo-dT	TRANSCRIPTOMIC	Mus musculus	ILLUMINA	2018-04-04T00:00:00Z	10X01_1	missing	SRP135960	CD-1	SScortex	Ad01
SRR6854072	p29	RNA-Seq	GCF_000001635.20	98	25520101992	PRJNA438862	SAMN08730874	Model organism or animal	9606313592	SI-3A-B1	KAROLINSKA INSTITUTE	public	TenX,sra	s3	s3.us-east-1	SRX3809378	Illumina HiSeq 2500	10X02_1	SINGLE	Oligo-dT	TRANSCRIPTOMIC	Mus musculus	ILLUMINA	2018-04-04T00:00:00Z	10X02_1	missing	SRP135960	CD-1	SScortex	Ad02
SRR6854073	p25-27	RNA-Seq	GCF_000001635.20	98	16758158074	PRJNA438862	SAMN08730991	Model organism or animal	5707058550	SI-3A-B2	KAROLINSKA INSTITUTE	public	sra,TenX	s3	s3.us-east-1	SRX3809377	Illumina HiSeq 2500	10X57_5	SINGLE	Oligo-dT	TRANSCRIPTOMIC	Mus musculus	ILLUMINA	2018-04-04T00:00:00Z	10X57_5	pooled male and female	SRP135960	Swiss	MidbrainVentral	Ad33\, Ad34
SRR6854074	p25-27	RNA-Seq	GCF_000001635.20	98	17456985392	PRJNA438862	SAMN08730992	Model organism or animal	6554532811	SI-3A-C2	KAROLINSKA INSTITUTE	public	sra,TenX	s3	s3.us-east-1	SRX3809376	Illumina HiSeq 2500	10X57_6	SINGLE	Oligo-dT	TRANSCRIPTOMIC	Mus musculus	ILLUMINA	2018-04-04T00:00:00Z	10X57_6	pooled male and female	SRP135960	Swiss	Thalamus	Ad33\, Ad34
SRR6854075	p25-27	RNA-Seq	GCF_000001635.20	98	17615081638	PRJNA438862	SAMN08730989	Model organism or animal	6472873668	SI-3A-H1	KAROLINSKA INSTITUTE	public	sra,TenX	s3	s3.us-east-1	SRX3809375	Illumina HiSeq 2500	10X57_3	SINGLE	Oligo-dT	TRANSCRIPTOMIC	Mus musculus	ILLUMINA	2018-04-04T00:00:00Z	10X57_3	pooled male and female	SRP135960	Swiss	MidbrainDorsal	Ad33\, Ad34
SRR6854076	p25-27	RNA-Seq	GCF_000001635.20	98	17790258402	PRJNA438862	SAMN08730990	Model organism or animal	6394425922	SI-3A-A2	KAROLINSKA INSTITUTE	public	TenX,sra	s3	s3.us-east-1	SRX3809374	Illumina HiSeq 2500	10X57_4	SINGLE	Oligo-dT	TRANSCRIPTOMIC	Mus musculus	ILLUMINA	2018-04-04T00:00:00Z	10X57_4	pooled male and female	SRP135960	Swiss	MidbrainVentral	Ad33\, Ad34
SRR6854077	p25-27	RNA-Seq	GCF_000001635.20	98	17912806226	PRJNA438862	SAMN08730987	Model organism or animal	6146041596	SI-3A-F1	KAROLINSKA INSTITUTE	public	sra,TenX	s3	s3.us-east-1	SRX3809373	Illumina HiSeq 2500	10X57_1	SINGLE	Oligo-dT	TRANSCRIPTOMIC	Mus musculus	ILLUMINA	2018-04-04T00:00:00Z	10X57_1	male	SRP135960	Swiss	Hypothalamus	Ad33
SRR6854078	p25-27	RNA-Seq	GCF_000001635.20	98	17515822142	PRJNA438862	SAMN08730988	Model organism or animal	6704071215	SI-3A-G1	KAROLINSKA INSTITUTE	public	sra,TenX	s3	s3.us-east-1	SRX3809372	Illumina HiSeq 2500	10X57_2	SINGLE	Oligo-dT	TRANSCRIPTOMIC	Mus musculus	ILLUMINA	2018-04-04T00:00:00Z	10X57_2	pooled male and female	SRP135960	Swiss	MidbrainDorsal	Ad33\, Ad34
SRR6854079	p25-27	RNA-Seq	GCF_000001635.20	98	14935053686	PRJNA438862	SAMN08730985	Model organism or animal	4456483693	SI-3A-C12	KAROLINSKA INSTITUTE	public	TenX,sra	s3	s3.us-east-1	SRX3809371	Illumina HiSeq 2500	10X56_3	SINGLE	Oligo-dT	TRANSCRIPTOMIC	Mus musculus	ILLUMINA	2018-04-04T00:00:00Z	10X56_3	male	SRP135960	Swiss	Amygdala	Ad33
SRR6854080	p25-27	RNA-Seq	GCF_000001635.20	98	17804421166	PRJNA438862	SAMN08730986	Model organism or animal	5490928364	SI-3A-F12	KAROLINSKA INSTITUTE	public	TenX,sra	s3	s3.us-east-1	SRX3809370	Illumina HiSeq 2500	10X56_6	SINGLE	Oligo-dT	TRANSCRIPTOMIC	Mus musculus	ILLUMINA	2018-04-04T00:00:00Z	10X56_6	male	SRP135960	Swiss	Hypothalamus	Ad33
SRR6854081	p22	RNA-Seq	GCF_000001635.20	99	14806848771	PRJNA438862	SAMN08730983	Model organism or animal	7233520089	SI-GA-H2	KAROLINSKA INSTITUTE	public	sra,TenX	s3	s3.us-east-1	SRX3809369	Illumina HiSeq 2500	10X55_8	SINGLE	Oligo-dT	TRANSCRIPTOMIC	Mus musculus	ILLUMINA	2018-04-04T00:00:00Z	10X55_8	pooled male and female	SRP135960	CD-1	Pons	Ad 31\, 32
SRR6854082	p25-27	RNA-Seq	GCF_000001635.20	98	12745951246	PRJNA438862	SAMN08730984	Model organism or animal	3773154229	SI-3A-B12	KAROLINSKA INSTITUTE	public	sra,TenX	s3	s3.us-east-1	SRX3809368	Illumina HiSeq 2500	10X56_2	SINGLE	Oligo-dT	TRANSCRIPTOMIC	Mus musculus	ILLUMINA	2018-04-04T00:00:00Z	10X56_2	male	SRP135960	Swiss	Amygdala	Ad33
SRR6854083	p22	RNA-Seq	GCF_000001635.20	98	16831653762	PRJNA438862	SAMN08730889	Model organism or animal	5245799128	SI-3A-D7	KAROLINSKA INSTITUTE	public	sra,TenX	s3	s3.us-east-1	SRX3809367	Illumina HiSeq 2500	10X20_2	SINGLE	Oligo-dT	TRANSCRIPTOMIC	Mus musculus	ILLUMINA	2018-04-04T00:00:00Z	10X20_2	female	SRP135960	CD-1	Ctx3	Ad10
SRR6854084	p22	RNA-Seq	GCF_000001635.20	98	18569566162	PRJNA438862	SAMN08730890	Model organism or animal	6317743568	SI-3A-C5	KAROLINSKA INSTITUTE	public	TenX,sra	s3	s3.us-east-1	SRX3809366	Illumina HiSeq 2500	10X20_3	SINGLE	Oligo-dT	TRANSCRIPTOMIC	Mus musculus	ILLUMINA	2018-04-04T00:00:00Z	10X20_3	female	SRP135960	CD-1	MidbrainDorsal	Ad10
SRR6854085	p21	RNA-Seq	GCF_000001635.20	98	17344393878	PRJNA438862	SAMN08730887	Model organism or animal	5926110910	SI-3A-B7	KAROLINSKA INSTITUTE	public	sra,TenX	s3	s3.us-east-1	SRX3809365	Illumina HiSeq 2500	10X19_2	SINGLE	Oligo-dT	TRANSCRIPTOMIC	Mus musculus	ILLUMINA	2018-04-04T00:00:00Z	10X19_2	male	SRP135960	CD-1	Ctx2	Ad09
SRR6854086	p22	RNA-Seq	GCF_000001635.20	98	16175240746	PRJNA438862	SAMN08730888	Model organism or animal	5172948078	SI-3A-C7	KAROLINSKA INSTITUTE	public	sra,TenX	s3	s3.us-east-1	SRX3809364	Illumina HiSeq 2500	10X20_1	SINGLE	Oligo-dT	TRANSCRIPTOMIC	Mus musculus	ILLUMINA	2018-04-04T00:00:00Z	10X20_1	female	SRP135960	CD-1	Ctx3	Ad10
SRR6854087	p23	RNA-Seq	GCF_000001635.20	98	14088255874	PRJNA438862	SAMN08730885	Model organism or animal	4476768234	SI-3A-D4	KAROLINSKA INSTITUTE	public	TenX,sra	s3	s3.us-east-1	SRX3809363	Illumina HiSeq 2500	10X07_1	SINGLE	Oligo-dT	TRANSCRIPTOMIC	Mus musculus	ILLUMINA	2018-04-04T00:00:00Z	10X07_1	pooled male and female	SRP135960	5ht3a-EGFP	CA1	CAint01\, CAint02\, CAint03\, CAint04
SRR6854088	p22-24	RNA-Seq	GCF_000001635.20	98	17760141630	PRJNA438862	SAMN08730886	Model organism or animal	5663087121	SI-3A-D1	KAROLINSKA INSTITUTE	public	sra,TenX	s3	s3.us-east-1	SRX3809362	Illumina HiSeq 2500	10X11_1	SINGLE	Oligo-dT	TRANSCRIPTOMIC	Mus musculus	ILLUMINA	2018-04-04T00:00:00Z	10X11_1	male	SRP135960	CD-1	Medulla	Ad07\, Ad08
SRR6854089	p30	RNA-Seq	GCF_000001635.20	98	15764076846	PRJNA438862	SAMN08730883	Model organism or animal	4376317279	SI-3A-B4	KAROLINSKA INSTITUTE	public	TenX,sra	s3	s3.us-east-1	SRX3809361	Illumina HiSeq 2500	10X06_2	SINGLE	Oligo-dT	TRANSCRIPTOMIC	Mus musculus	ILLUMINA	2018-04-04T00:00:00Z	10X06_2	male	SRP135960	CD-1	Amygdala	Ad06
SRR6854090	p30	RNA-Seq	GCF_000001635.20	98	16666488384	PRJNA438862	SAMN08730884	Model organism or animal	5612425467	SI-3A-C1	KAROLINSKA INSTITUTE	public	sra,TenX	s3	s3.us-east-1	SRX3809360	Illumina HiSeq 2500	10X06_3	SINGLE	Oligo-dT	TRANSCRIPTOMIC	Mus musculus	ILLUMINA	2018-04-04T00:00:00Z	10X06_3	male	SRP135960	CD-1	Hypothalamus	Ad06
SRR6854091	p22	RNA-Seq	GCF_000001635.20	98	17527276676	PRJNA438862	SAMN08730891	Model organism or animal	5775576566	SI-3A-D5	KAROLINSKA INSTITUTE	public	sra,TenX	s3	s3.us-east-1	SRX3809359	Illumina HiSeq 2500	10X20_4	SINGLE	Oligo-dT	TRANSCRIPTOMIC	Mus musculus	ILLUMINA	2018-04-04T00:00:00Z	10X20_4	female	SRP135960	CD-1	MidbrainDorsal	Ad10
SRR6854092	p23	RNA-Seq	GCF_000001635.20	98	17153346896	PRJNA438862	SAMN08730892	Model organism or animal	5069045755	SI-3A-E7	KAROLINSKA INSTITUTE	public	TenX,sra	s3	s3.us-east-1	SRX3809358	Illumina HiSeq 2500	10X22_1	SINGLE	Oligo-dT	TRANSCRIPTOMIC	Mus musculus	ILLUMINA	2018-04-04T00:00:00Z	10X22_1	male	SRP135960	CD-1	Ctx1	Ad11
SRR6854093	p22	RNA-Seq	GCF_000001635.20	99	14569960581	PRJNA438862	SAMN08730982	Model organism or animal	7340251492	SI-GA-G2	KAROLINSKA INSTITUTE	public	TenX,sra	s3	s3.us-east-1	SRX3809357	Illumina HiSeq 2500	10X55_7	SINGLE	Oligo-dT	TRANSCRIPTOMIC	Mus musculus	ILLUMINA	2018-04-04T00:00:00Z	10X55_7	pooled male and female	SRP135960	CD-1	Pons	Ad 31\, 32
SRR6854094	p22	RNA-Seq	GCF_000001635.20	99	13472920098	PRJNA438862	SAMN08730981	Model organism or animal	6111903808	SI-GA-F2	KAROLINSKA INSTITUTE	public	TenX,sra	s3	s3.us-east-1	SRX3809356	Illumina HiSeq 2500	10X55_6	SINGLE	Oligo-dT	TRANSCRIPTOMIC	Mus musculus	ILLUMINA	2018-04-04T00:00:00Z	10X55_6	pooled male and female	SRP135960	CD-1	Pons	Ad 31\, 32
SRR6854095	p29	RNA-Seq	GCF_000001635.20	98	15665074208	PRJNA438862	SAMN08730881	Model organism or animal	4486483045	SI-3A-D3	KAROLINSKA INSTITUTE	public	TenX,sra	s3	s3.us-east-1	SRX3809355	Illumina HiSeq 2500	10X05_4	SINGLE	Oligo-dT	TRANSCRIPTOMIC	Mus musculus	ILLUMINA	2018-04-04T00:00:00Z	10X05_4	female	SRP135960	CD-1	StriatumDorsal	Ad05
SRR6854096	p30	RNA-Seq	GCF_000001635.20	98	15957994542	PRJNA438862	SAMN08730882	Model organism or animal	4452760467	SI-3A-A4	KAROLINSKA INSTITUTE	public	sra,TenX	s3	s3.us-east-1	SRX3809354	Illumina HiSeq 2500	10X06_1	SINGLE	Oligo-dT	TRANSCRIPTOMIC	Mus musculus	ILLUMINA	2018-04-04T00:00:00Z	10X06_1	male	SRP135960	CD-1	Amygdala	Ad06
SRR6854097	p22	RNA-Seq	GCF_000001635.20	99	14092783155	PRJNA438862	SAMN08730978	Model organism or animal	7618817249	SI-GA-C2	KAROLINSKA INSTITUTE	public	TenX,sra	s3	s3.us-east-1	SRX3809353	Illumina HiSeq 2500	10X55_3	SINGLE	Oligo-dT	TRANSCRIPTOMIC	Mus musculus	ILLUMINA	2018-04-04T00:00:00Z	10X55_3	pooled male and female	SRP135960	CD-1	Medulla	Ad 31\, 32
SRR6854098	p22	RNA-Seq	GCF_000001635.20	99	14869438650	PRJNA438862	SAMN08730977	Model organism or animal	7835644263	SI-GA-B2	KAROLINSKA INSTITUTE	public	TenX,sra	s3	s3.us-east-1	SRX3809352	Illumina HiSeq 2500	10X55_2	SINGLE	Oligo-dT	TRANSCRIPTOMIC	Mus musculus	ILLUMINA	2018-04-04T00:00:00Z	10X55_2	pooled male and female	SRP135960	CD-1	Medulla	Ad 31\, 32
SRR6854099	p28	RNA-Seq	GCF_000001635.20	98	14701795654	PRJNA438862	SAMN08730877	Model organism or animal	4352173597	SI-3A-H3	KAROLINSKA INSTITUTE	public	sra,TenX	s3	s3.us-east-1	SRX3809351	Illumina HiSeq 2500	10X04_4	SINGLE	Oligo-dT	TRANSCRIPTOMIC	Mus musculus	ILLUMINA	2018-04-04T00:00:00Z	10X04_4	female	SRP135960	CD-1	OB	Ad04
SRR6854100	p29	RNA-Seq	GCF_000001635.20	98	15692499998	PRJNA438862	SAMN08730878	Model organism or animal	6026237866	SI-3A-A1	KAROLINSKA INSTITUTE	public	sra,TenX	s3	s3.us-east-1	SRX3809350	Illumina HiSeq 2500	10X05_1	SINGLE	Oligo-dT	TRANSCRIPTOMIC	Mus musculus	ILLUMINA	2018-04-04T00:00:00Z	10X05_1	female	SRP135960	CD-1	Ctx1	Ad05
SRR6854101	p28	RNA-Seq	GCF_000001635.20	98	15207628926	PRJNA438862	SAMN08730875	Model organism or animal	4431008538	SI-3A-E3	KAROLINSKA INSTITUTE	public	TenX,sra	s3	s3.us-east-1	SRX3809349	Illumina HiSeq 2500	10X04_1	SINGLE	Oligo-dT	TRANSCRIPTOMIC	Mus musculus	ILLUMINA	2018-04-04T00:00:00Z	10X04_1	female	SRP135960	CD-1	HC	Ad04
SRR6854102	p28	RNA-Seq	GCF_000001635.20	98	15095037314	PRJNA438862	SAMN08730876	Model organism or animal	4705189508	SI-3A-F3	KAROLINSKA INSTITUTE	public	sra,TenX	s3	s3.us-east-1	SRX3809348	Illumina HiSeq 2500	10X04_2	SINGLE	Oligo-dT	TRANSCRIPTOMIC	Mus musculus	ILLUMINA	2018-04-04T00:00:00Z	10X04_2	female	SRP135960	CD-1	HC	Ad04
SRR6854103	p22	RNA-Seq	GCF_000001635.20	99	11906576154	PRJNA438862	SAMN08730976	Model organism or animal	5100173490	SI-GA-A2	KAROLINSKA INSTITUTE	public	TenX,sra	s3	s3.us-east-1	SRX3809347	Illumina HiSeq 2500	10X55_1	SINGLE	Oligo-dT	TRANSCRIPTOMIC	Mus musculus	ILLUMINA	2018-04-04T00:00:00Z	10X55_1	pooled male and female	SRP135960	CD-1	Medulla	Ad 31\, 32
SRR6854104	p21	RNA-Seq	GCF_000001635.20	99	14221380591	PRJNA438862	SAMN08730975	Model organism or animal	7025206766	SI-GA-H1	KAROLINSKA INSTITUTE	public	sra,TenX	s3	s3.us-east-1	SRX3809346	Illumina HiSeq 2500	10X54_8	SINGLE	Oligo-dT	TRANSCRIPTOMIC	Mus musculus	ILLUMINA	2018-04-04T00:00:00Z	10X54_8	pooled male and female	SRP135960	CD-1	Pons	Ad 29\, 30
SRR6854105	p21-23	RNA-Seq	GCF_000001635.20	98	16854714828	PRJNA438862	SAMN08730962	Model organism or animal	6003046103	SI-3A-B11	KAROLINSKA INSTITUTE	public	TenX,sra	s3	s3.us-east-1	SRX3809345	Illumina HiSeq 2500	10X53_2	SINGLE	Oligo-dT	TRANSCRIPTOMIC	Mus musculus	ILLUMINA	2018-04-04T00:00:00Z	10X53_2	pooled male and female	SRP135960	Swiss	SC	Ad27\, Ad28
SRR6854106	p21-23	RNA-Seq	GCF_000001635.20	98	17169748176	PRJNA438862	SAMN08730961	Model organism or animal	6353299257	SI-3A-A11	KAROLINSKA INSTITUTE	public	sra,TenX	s3	s3.us-east-1	SRX3809344	Illumina HiSeq 2500	10X53_1	SINGLE	Oligo-dT	TRANSCRIPTOMIC	Mus musculus	ILLUMINA	2018-04-04T00:00:00Z	10X53_1	pooled male and female	SRP135960	Swiss	SC	Ad27\, Ad28
SRR6854107	p20	RNA-Seq	GCF_000001635.20	98	16945135116	PRJNA438862	SAMN08730958	Model organism or animal	6388497544	SI-3A-E10	KAROLINSKA INSTITUTE	public	sra,TenX	s3	s3.us-east-1	SRX3809343	Illumina HiSeq 2500	10X52_5	SINGLE	Oligo-dT	TRANSCRIPTOMIC	Mus musculus	ILLUMINA	2018-04-04T00:00:00Z	10X52_5	male	SRP135960	CD-1	MidbrainVentral	Ad26
SRR6854108	p20	RNA-Seq	GCF_000001635.20	98	17085264630	PRJNA438862	SAMN08730957	Model organism or animal	6327290798	SI-3A-D10	KAROLINSKA INSTITUTE	public	sra,TenX	s3	s3.us-east-1	SRX3809342	Illumina HiSeq 2500	10X52_4	SINGLE	Oligo-dT	TRANSCRIPTOMIC	Mus musculus	ILLUMINA	2018-04-04T00:00:00Z	10X52_4	male	SRP135960	CD-1	MidbrainDorsal	Ad26
SRR6854109	p20	RNA-Seq	GCF_000001635.20	98	7915955782	PRJNA438862	SAMN08730960	Model organism or animal	2527366574	SI-3A-H10	KAROLINSKA INSTITUTE	public	sra,TenX	s3	s3.us-east-1	SRX3809341	Illumina HiSeq 2500	10X52_8	SINGLE	Oligo-dT	TRANSCRIPTOMIC	Mus musculus	ILLUMINA	2018-04-04T00:00:00Z	10X52_8	male	SRP135960	CD-1	MidbrainVentral	Ad26
SRR6854110	p20	RNA-Seq	GCF_000001635.20	98	18334554812	PRJNA438862	SAMN08730959	Model organism or animal	5873418086	SI-3A-F10	KAROLINSKA INSTITUTE	public	TenX,sra	s3	s3.us-east-1	SRX3809340	Illumina HiSeq 2500	10X52_6	SINGLE	Oligo-dT	TRANSCRIPTOMIC	Mus musculus	ILLUMINA	2018-04-04T00:00:00Z	10X52_6	male	SRP135960	CD-1	MidbrainVentral	Ad26
SRR6854111	p20	RNA-Seq	GCF_000001635.20	98	14903932316	PRJNA438862	SAMN08730954	Model organism or animal	5712561770	SI-3A-A10	KAROLINSKA INSTITUTE	public	sra,TenX	s3	s3.us-east-1	SRX3809339	Illumina HiSeq 2500	10X52_1	SINGLE	Oligo-dT	TRANSCRIPTOMIC	Mus musculus	ILLUMINA	2018-04-04T00:00:00Z	10X52_1	male	SRP135960	CD-1	MidbrainDorsal	Ad26
SRR6854112	missing	RNA-Seq	GCF_000001635.20	98	12491045798	PRJNA438862	SAMN08730953	Model organism or animal	5223732332	SI-3A-E1	KAROLINSKA INSTITUTE	public	sra,TenX	s3	s3.us-east-1	SRX3809338	Illumina HiSeq 2500	10X51_5	SINGLE	Oligo-dT	TRANSCRIPTOMIC	Mus musculus	ILLUMINA	2018-04-04T00:00:00Z	10X51_5	missing	SRP135960	CD-1	mES	mES
SRR6854113	p20	RNA-Seq	GCF_000001635.20	98	17761657690	PRJNA438862	SAMN08730956	Model organism or animal	6515437084	SI-3A-C10	KAROLINSKA INSTITUTE	public	TenX,sra	s3	s3.us-east-1	SRX3809337	Illumina HiSeq 2500	10X52_3	SINGLE	Oligo-dT	TRANSCRIPTOMIC	Mus musculus	ILLUMINA	2018-04-04T00:00:00Z	10X52_3	male	SRP135960	CD-1	MidbrainDorsal	Ad26
SRR6854114	p20	RNA-Seq	GCF_000001635.20	98	17166365020	PRJNA438862	SAMN08730955	Model organism or animal	6235866577	SI-3A-B10	KAROLINSKA INSTITUTE	public	sra,TenX	s3	s3.us-east-1	SRX3809336	Illumina HiSeq 2500	10X52_2	SINGLE	Oligo-dT	TRANSCRIPTOMIC	Mus musculus	ILLUMINA	2018-04-04T00:00:00Z	10X52_2	male	SRP135960	CD-1	MidbrainDorsal	Ad26
SRR6854115	p29	RNA-Seq	GCF_000001635.20	98	16757932282	PRJNA438862	SAMN08730936	Model organism or animal	6541247392	SI-3A-B8	KAROLINSKA INSTITUTE	public	sra,TenX	s3	s3.us-east-1	SRX3809335	Illumina HiSeq 2500	10X49_1	SINGLE	Oligo-dT	TRANSCRIPTOMIC	Mus musculus	ILLUMINA	2018-04-04T00:00:00Z	10X49_1	female	SRP135960	CD-1	Amygdala	Ad24
SRR6854116	p20	RNA-Seq	GCF_000001635.20	98	15344563934	PRJNA438862	SAMN08730935	Model organism or animal	4937464774	SI-3A-A8	KAROLINSKA INSTITUTE	public	TenX,sra	s3	s3.us-east-1	SRX3809334	Illumina HiSeq 2500	10X48_4	SINGLE	Oligo-dT	TRANSCRIPTOMIC	Mus musculus	ILLUMINA	2018-04-04T00:00:00Z	10X48_4	pooled male and female	SRP135960	CD-1	Pons	Pdgfra01\, Pdgfra02
SRR6854117	p20	RNA-Seq	GCF_000001635.20	98	16980910408	PRJNA438862	SAMN08730934	Model organism or animal	4843957237	SI-3A-F7	KAROLINSKA INSTITUTE	public	TenX,sra	s3	s3.us-east-1	SRX3809333	Illumina HiSeq 2500	10X48_3	SINGLE	Oligo-dT	TRANSCRIPTOMIC	Mus musculus	ILLUMINA	2018-04-04T00:00:00Z	10X48_3	pooled male and female	SRP135960	CD-1	Pons	Pdgfra01\, Pdgfra02
SRR6854118	p20	RNA-Seq	GCF_000001635.20	98	17699539214	PRJNA438862	SAMN08730933	Model organism or animal	5234884490	SI-3A-E7	KAROLINSKA INSTITUTE	public	TenX,sra	s3	s3.us-east-1	SRX3809332	Illumina HiSeq 2500	10X48_2	SINGLE	Oligo-dT	TRANSCRIPTOMIC	Mus musculus	ILLUMINA	2018-04-04T00:00:00Z	10X48_2	pooled male and female	SRP135960	CD-1	Medulla	Pdgfra01\, Pdgfra02
SRR6854119	p29	RNA-Seq	GCF_000001635.20	98	15832860792	PRJNA438862	SAMN08730940	Model organism or animal	5359700715	SI-3A-F8	KAROLINSKA INSTITUTE	public	TenX,sra	s3	s3.us-east-1	SRX3809331	Illumina HiSeq 2500	10X49_5	SINGLE	Oligo-dT	TRANSCRIPTOMIC	Mus musculus	ILLUMINA	2018-04-04T00:00:00Z	10X49_5	female	SRP135960	CD-1	OB	Ad24
SRR6854120	p29	RNA-Seq	GCF_000001635.20	98	16941386028	PRJNA438862	SAMN08730939	Model organism or animal	5787952632	SI-3A-E8	KAROLINSKA INSTITUTE	public	TenX,sra	s3	s3.us-east-1	SRX3809330	Illumina HiSeq 2500	10X49_4	SINGLE	Oligo-dT	TRANSCRIPTOMIC	Mus musculus	ILLUMINA	2018-04-04T00:00:00Z	10X49_4	female	SRP135960	CD-1	OB	Ad24
SRR6854121	p29	RNA-Seq	GCF_000001635.20	98	16221863462	PRJNA438862	SAMN08730938	Model organism or animal	5748757170	SI-3A-D8	KAROLINSKA INSTITUTE	public	sra,TenX	s3	s3.us-east-1	SRX3809329	Illumina HiSeq 2500	10X49_3	SINGLE	Oligo-dT	TRANSCRIPTOMIC	Mus musculus	ILLUMINA	2018-04-04T00:00:00Z	10X49_3	female	SRP135960	CD-1	Amygdala	Ad24
SRR6854122	p29	RNA-Seq	GCF_000001635.20	98	17595147458	PRJNA438862	SAMN08730937	Model organism or animal	5665155845	SI-3A-C8	KAROLINSKA INSTITUTE	public	sra,TenX	s3	s3.us-east-1	SRX3809328	Illumina HiSeq 2500	10X49_2	SINGLE	Oligo-dT	TRANSCRIPTOMIC	Mus musculus	ILLUMINA	2018-04-04T00:00:00Z	10X49_2	female	SRP135960	CD-1	Amygdala	Ad24
SRR6854123	p19	RNA-Seq	GCF_000001635.20	98	19153428896	PRJNA438862	SAMN08730942	Model organism or animal	7145582336	SI-3A-B9	KAROLINSKA INSTITUTE	public	bam,sra	s3	s3.us-east-1	SRX3809327	Illumina HiSeq 2500	10X50_2	SINGLE	Oligo-dT	TRANSCRIPTOMIC	Mus musculus	ILLUMINA	2018-04-04T00:00:00Z	10X50_2	female	SRP135960	CD-1	Hypothalamus	Ad25
SRR6854124	p19	RNA-Seq	GCF_000001635.20	98	17650070774	PRJNA438862	SAMN08730941	Model organism or animal	7036900228	SI-3A-A9	KAROLINSKA INSTITUTE	public	sra,bam	s3	s3.us-east-1	SRX3809326	Illumina HiSeq 2500	10X50_1	SINGLE	Oligo-dT	TRANSCRIPTOMIC	Mus musculus	ILLUMINA	2018-04-04T00:00:00Z	10X50_1	female	SRP135960	CD-1	Hypothalamus	Ad25
SRR6854125	p21	RNA-Seq	GCF_000001635.20	99	18051082038	PRJNA438862	SAMN08730971	Model organism or animal	8270581559	SI-GA-D1	KAROLINSKA INSTITUTE	public	sra,TenX	s3	s3.us-east-1	SRX3809325	Illumina HiSeq 2500	10X54_4	SINGLE	Oligo-dT	TRANSCRIPTOMIC	Mus musculus	ILLUMINA	2018-04-04T00:00:00Z	10X54_4	pooled male and female	SRP135960	CD-1	Medulla	Ad 29\, 30
SRR6854126	p21	RNA-Seq	GCF_000001635.20	99	14579766432	PRJNA438862	SAMN08730972	Model organism or animal	6692863389	SI-GA-E1	KAROLINSKA INSTITUTE	public	sra,TenX	s3	s3.us-east-1	SRX3809324	Illumina HiSeq 2500	10X54_5	SINGLE	Oligo-dT	TRANSCRIPTOMIC	Mus musculus	ILLUMINA	2018-04-04T00:00:00Z	10X54_5	pooled male and female	SRP135960	CD-1	Pons	Ad 29\, 30
SRR6854127	p21	RNA-Seq	GCF_000001635.20	99	16377919767	PRJNA438862	SAMN08730969	Model organism or animal	8947783747	SI-GA-B1	KAROLINSKA INSTITUTE	public	sra,TenX	s3	s3.us-east-1	SRX3809323	Illumina HiSeq 2500	10X54_2	SINGLE	Oligo-dT	TRANSCRIPTOMIC	Mus musculus	ILLUMINA	2018-04-04T00:00:00Z	10X54_2	pooled male and female	SRP135960	CD-1	Medulla	Ad 29\, 30
SRR6854128	p21	RNA-Seq	GCF_000001635.20	99	15235273251	PRJNA438862	SAMN08730970	Model organism or animal	8636359771	SI-GA-C1	KAROLINSKA INSTITUTE	public	TenX,sra	s3	s3.us-east-1	SRX3809322	Illumina HiSeq 2500	10X54_3	SINGLE	Oligo-dT	TRANSCRIPTOMIC	Mus musculus	ILLUMINA	2018-04-04T00:00:00Z	10X54_3	pooled male and female	SRP135960	CD-1	Medulla	Ad 29\, 30
SRR6854129	p21-23	RNA-Seq	GCF_000001635.20	98	12264987826	PRJNA438862	SAMN08730967	Model organism or animal	4031047949	SI-3A-G11	KAROLINSKA INSTITUTE	public	TenX,sra	s3	s3.us-east-1	SRX3809321	Illumina HiSeq 2500	10X53_7	SINGLE	Oligo-dT	TRANSCRIPTOMIC	Mus musculus	ILLUMINA	2018-04-04T00:00:00Z	10X53_7	female	SRP135960	Swiss	DRG	Ad27
SRR6854130	p21	RNA-Seq	GCF_000001635.20	99	15688799973	PRJNA438862	SAMN08730968	Model organism or animal	7188545192	SI-GA-A1	KAROLINSKA INSTITUTE	public	TenX,sra	s3	s3.us-east-1	SRX3809320	Illumina HiSeq 2500	10X54_1	SINGLE	Oligo-dT	TRANSCRIPTOMIC	Mus musculus	ILLUMINA	2018-04-04T00:00:00Z	10X54_1	pooled male and female	SRP135960	CD-1	Medulla	Ad 29\, 30
SRR6854131	p21-23	RNA-Seq	GCF_000001635.20	98	17409320250	PRJNA438862	SAMN08730965	Model organism or animal	6327132839	SI-3A-E11	KAROLINSKA INSTITUTE	public	sra,TenX	s3	s3.us-east-1	SRX3809319	Illumina HiSeq 2500	10X53_5	SINGLE	Oligo-dT	TRANSCRIPTOMIC	Mus musculus	ILLUMINA	2018-04-04T00:00:00Z	10X53_5	pooled male and female	SRP135960	Swiss	SC	Ad27\, Ad28
SRR6854132	p21-23	RNA-Seq	GCF_000001635.20	98	13315788318	PRJNA438862	SAMN08730966	Model organism or animal	4470766581	SI-3A-F11	KAROLINSKA INSTITUTE	public	TenX,sra	s3	s3.us-east-1	SRX3809318	Illumina HiSeq 2500	10X53_6	SINGLE	Oligo-dT	TRANSCRIPTOMIC	Mus musculus	ILLUMINA	2018-04-04T00:00:00Z	10X53_6	pooled male and female	SRP135960	Swiss	SC	Ad27\, Ad28
SRR6854133	p21-23	RNA-Seq	GCF_000001635.20	98	17838508408	PRJNA438862	SAMN08730963	Model organism or animal	7030743616	SI-3A-C11	KAROLINSKA INSTITUTE	public	TenX,sra	s3	s3.us-east-1	SRX3809317	Illumina HiSeq 2500	10X53_3	SINGLE	Oligo-dT	TRANSCRIPTOMIC	Mus musculus	ILLUMINA	2018-04-04T00:00:00Z	10X53_3	pooled male and female	SRP135960	Swiss	SC	Ad27\, Ad28
SRR6854134	p21-23	RNA-Seq	GCF_000001635.20	98	17544474696	PRJNA438862	SAMN08730964	Model organism or animal	6447861291	SI-3A-D11	KAROLINSKA INSTITUTE	public	sra,TenX	s3	s3.us-east-1	SRX3809316	Illumina HiSeq 2500	10X53_4	SINGLE	Oligo-dT	TRANSCRIPTOMIC	Mus musculus	ILLUMINA	2018-04-04T00:00:00Z	10X53_4	pooled male and female	SRP135960	Swiss	SC	Ad27\, Ad28
SRR6854135	p19	RNA-Seq	GCF_000001635.20	98	16536648282	PRJNA438862	SAMN08730951	Model organism or animal	5902947032	SI-3A-C1	KAROLINSKA INSTITUTE	public	sra,TenX	s3	s3.us-east-1	SRX3809315	Illumina HiSeq 2500	10X51_3	SINGLE	Oligo-dT	TRANSCRIPTOMIC	Mus musculus	ILLUMINA	2018-04-04T00:00:00Z	10X51_3	female	SRP135960	CD-1	Hypothalamus	Ad25
SRR6854136	p19	RNA-Seq	GCF_000001635.20	98	15986430124	PRJNA438862	SAMN08730952	Model organism or animal	6251515964	SI-3A-D1	KAROLINSKA INSTITUTE	public	sra,TenX	s3	s3.us-east-1	SRX3809314	Illumina HiSeq 2500	10X51_4	SINGLE	Oligo-dT	TRANSCRIPTOMIC	Mus musculus	ILLUMINA	2018-04-04T00:00:00Z	10X51_4	female	SRP135960	CD-1	Hypothalamus	Ad25
SRR6854137	p19	RNA-Seq	GCF_000001635.20	98	18285464358	PRJNA438862	SAMN08730947	Model organism or animal	7923280720	SI-3A-G9	KAROLINSKA INSTITUTE	public	TenX,sra	s3	s3.us-east-1	SRX3809313	Illumina HiSeq 2500	10X50_7	SINGLE	Oligo-dT	TRANSCRIPTOMIC	Mus musculus	ILLUMINA	2018-04-04T00:00:00Z	10X50_7	female	SRP135960	CD-1	Thalamus	Ad25
SRR6854138	p19	RNA-Seq	GCF_000001635.20	98	17573105004	PRJNA438862	SAMN08730948	Model organism or animal	7142852974	SI-3A-H9	KAROLINSKA INSTITUTE	public	TenX,sra	s3	s3.us-east-1	SRX3809312	Illumina HiSeq 2500	10X50_8	SINGLE	Oligo-dT	TRANSCRIPTOMIC	Mus musculus	ILLUMINA	2018-04-04T00:00:00Z	10X50_8	female	SRP135960	CD-1	Thalamus	Ad25
SRR6854139	p19	RNA-Seq	GCF_000001635.20	98	10390070740	PRJNA438862	SAMN08730949	Model organism or animal	4354913469	SI-3A-A1	KAROLINSKA INSTITUTE	public	sra,TenX	s3	s3.us-east-1	SRX3809311	Illumina HiSeq 2500	10X51_1	SINGLE	Oligo-dT	TRANSCRIPTOMIC	Mus musculus	ILLUMINA	2018-04-04T00:00:00Z	10X51_1	female	SRP135960	CD-1	CB	Ad25
SRR6854140	p19	RNA-Seq	GCF_000001635.20	98	15477606480	PRJNA438862	SAMN08730950	Model organism or animal	6106903914	SI-3A-B1	KAROLINSKA INSTITUTE	public	TenX,sra	s3	s3.us-east-1	SRX3809310	Illumina HiSeq 2500	10X51_2	SINGLE	Oligo-dT	TRANSCRIPTOMIC	Mus musculus	ILLUMINA	2018-04-04T00:00:00Z	10X51_2	female	SRP135960	CD-1	CB	Ad25
SRR6854141	p19	RNA-Seq	GCF_000001635.20	98	15675227792	PRJNA438862	SAMN08730943	Model organism or animal	5622364847	SI-3A-C9	KAROLINSKA INSTITUTE	public	sra,TenX	s3	s3.us-east-1	SRX3809309	Illumina HiSeq 2500	10X50_3	SINGLE	Oligo-dT	TRANSCRIPTOMIC	Mus musculus	ILLUMINA	2018-04-04T00:00:00Z	10X50_3	female	SRP135960	CD-1	Hypothalamus	Ad25
SRR6854142	p19	RNA-Seq	GCF_000001635.20	98	19105768066	PRJNA438862	SAMN08730944	Model organism or animal	7370413785	SI-3A-D9	KAROLINSKA INSTITUTE	public	TenX,sra	s3	s3.us-east-1	SRX3809308	Illumina HiSeq 2500	10X50_4	SINGLE	Oligo-dT	TRANSCRIPTOMIC	Mus musculus	ILLUMINA	2018-04-04T00:00:00Z	10X50_4	female	SRP135960	CD-1	Hypothalamus	Ad25
SRR6854143	p19	RNA-Seq	GCF_000001635.20	98	18631377604	PRJNA438862	SAMN08730945	Model organism or animal	8080051110	SI-3A-E9	KAROLINSKA INSTITUTE	public	TenX,sra	s3	s3.us-east-1	SRX3809307	Illumina HiSeq 2500	10X50_5	SINGLE	Oligo-dT	TRANSCRIPTOMIC	Mus musculus	ILLUMINA	2018-04-04T00:00:00Z	10X50_5	female	SRP135960	CD-1	Thalamus	Ad25
SRR6854144	p19	RNA-Seq	GCF_000001635.20	98	14919403870	PRJNA438862	SAMN08730946	Model organism or animal	5237166072	SI-3A-F9	KAROLINSKA INSTITUTE	public	TenX,sra	s3	s3.us-east-1	SRX3809306	Illumina HiSeq 2500	10X50_6	SINGLE	Oligo-dT	TRANSCRIPTOMIC	Mus musculus	ILLUMINA	2018-04-04T00:00:00Z	10X50_6	female	SRP135960	CD-1	Thalamus	Ad25
SRR6854145	p29	RNA-Seq	GCF_000001635.20	98	15082600428	PRJNA438862	SAMN08730879	Model organism or animal	5189561133	SI-3A-H2	KAROLINSKA INSTITUTE	public	TenX,sra	s3	s3.us-east-1	SRX3809305	Illumina HiSeq 2500	10X05_2	SINGLE	Oligo-dT	TRANSCRIPTOMIC	Mus musculus	ILLUMINA	2018-04-04T00:00:00Z	10X05_2	female	SRP135960	CD-1	Ctx1	Ad05
SRR6854146	p29	RNA-Seq	GCF_000001635.20	98	17538582446	PRJNA438862	SAMN08730880	Model organism or animal	5595901842	SI-3A-B1	KAROLINSKA INSTITUTE	public	TenX,sra	s3	s3.us-east-1	SRX3809304	Illumina HiSeq 2500	10X05_3	SINGLE	Oligo-dT	TRANSCRIPTOMIC	Mus musculus	ILLUMINA	2018-04-04T00:00:00Z	10X05_3	female	SRP135960	CD-1	StriatumDorsal	Ad05
SRR6854147	p22	RNA-Seq	GCF_000001635.20	99	16282632366	PRJNA438862	SAMN08730980	Model organism or animal	7194001322	SI-GA-E2	KAROLINSKA INSTITUTE	public	sra,TenX	s3	s3.us-east-1	SRX3809303	Illumina HiSeq 2500	10X55_5	SINGLE	Oligo-dT	TRANSCRIPTOMIC	Mus musculus	ILLUMINA	2018-04-04T00:00:00Z	10X55_5	pooled male and female	SRP135960	CD-1	Pons	Ad 31\, 32
SRR6854148	p22	RNA-Seq	GCF_000001635.20	99	12175040592	PRJNA438862	SAMN08730979	Model organism or animal	5251678672	SI-GA-D2	KAROLINSKA INSTITUTE	public	TenX,sra	s3	s3.us-east-1	SRX3809302	Illumina HiSeq 2500	10X55_4	SINGLE	Oligo-dT	TRANSCRIPTOMIC	Mus musculus	ILLUMINA	2018-04-04T00:00:00Z	10X55_4	pooled male and female	SRP135960	CD-1	Medulla	Ad 31\, 32
SRR6854149	p21	RNA-Seq	GCF_000001635.20	99	14951534895	PRJNA438862	SAMN08730974	Model organism or animal	7612684960	SI-GA-G1	KAROLINSKA INSTITUTE	public	TenX,sra	s3	s3.us-east-1	SRX3809301	Illumina HiSeq 2500	10X54_7	SINGLE	Oligo-dT	TRANSCRIPTOMIC	Mus musculus	ILLUMINA	2018-04-04T00:00:00Z	10X54_7	pooled male and female	SRP135960	CD-1	Pons	Ad 29\, 30
SRR6854150	p27	RNA-Seq	GCF_000001635.20	98	18233091492	PRJNA438862	SAMN08730922	Model organism or animal	4951192593	SI-3A-A12	KAROLINSKA INSTITUTE	public	sra,TenX	s3	s3.us-east-1	SRX3809300	Illumina HiSeq 2500	10X36_3	SINGLE	Oligo-dT	TRANSCRIPTOMIC	Mus musculus	ILLUMINA	2018-04-04T00:00:00Z	10X36_3	pooled male and female	SRP135960	vGat-tdTomato	Ctx2	CAint05\, CAint06\, CAint07
SRR6854151	p27	RNA-Seq	GCF_000001635.20	98	17312210678	PRJNA438862	SAMN08730921	Model organism or animal	4866863700	SI-3A-H11	KAROLINSKA INSTITUTE	public	sra,TenX	s3	s3.us-east-1	SRX3809299	Illumina HiSeq 2500	10X36_2	SINGLE	Oligo-dT	TRANSCRIPTOMIC	Mus musculus	ILLUMINA	2018-04-04T00:00:00Z	10X36_2	pooled male and female	SRP135960	vGat-tdTomato	CA1	CAint05\, CAint06\, CAint07
SRR6854152	p21	RNA-Seq	GCF_000001635.20	99	17254703367	PRJNA438862	SAMN08730973	Model organism or animal	7941913483	SI-GA-F1	KAROLINSKA INSTITUTE	public	sra,TenX	s3	s3.us-east-1	SRX3809298	Illumina HiSeq 2500	10X54_6	SINGLE	Oligo-dT	TRANSCRIPTOMIC	Mus musculus	ILLUMINA	2018-04-04T00:00:00Z	10X54_6	pooled male and female	SRP135960	CD-1	Pons	Ad 29\, 30
SRR6854153	p21	RNA-Seq	GCF_000001635.20	98	18031803902	PRJNA438862	SAMN08730914	Model organism or animal	6790430033	SI-3A-G4	KAROLINSKA INSTITUTE	public	sra,TenX	s3	s3.us-east-1	SRX3809297	Illumina HiSeq 2500	10X34_3	SINGLE	Oligo-dT	TRANSCRIPTOMIC	Mus musculus	ILLUMINA	2018-04-04T00:00:00Z	10X34_3	female	SRP135960	CD-1	MidbrainVentral	Ad17
SRR6854154	p21	RNA-Seq	GCF_000001635.20	98	15801029118	PRJNA438862	SAMN08730913	Model organism or animal	5323479650	SI-3A-F4	KAROLINSKA INSTITUTE	public	sra,TenX	s3	s3.us-east-1	SRX3809296	Illumina HiSeq 2500	10X34_2	SINGLE	Oligo-dT	TRANSCRIPTOMIC	Mus musculus	ILLUMINA	2018-04-04T00:00:00Z	10X34_2	female	SRP135960	CD-1	Amygdala	Ad17
SRR6854155	p26	RNA-Seq	GCF_000001635.20	98	17921335068	PRJNA438862	SAMN08730916	Model organism or animal	5482356700	SI-3A-C11	KAROLINSKA INSTITUTE	public	sra,TenX	s3	s3.us-east-1	SRX3809295	Illumina HiSeq 2500	10X35_1	SINGLE	Oligo-dT	TRANSCRIPTOMIC	Mus musculus	ILLUMINA	2018-04-04T00:00:00Z	10X35_1	female	SRP135960	CD-1	Ctx2	Ad18
SRR6854156	p21	RNA-Seq	GCF_000001635.20	98	17014817134	PRJNA438862	SAMN08730915	Model organism or animal	6533228385	SI-3A-H4	KAROLINSKA INSTITUTE	public	sra,TenX	s3	s3.us-east-1	SRX3809294	Illumina HiSeq 2500	10X34_4	SINGLE	Oligo-dT	TRANSCRIPTOMIC	Mus musculus	ILLUMINA	2018-04-04T00:00:00Z	10X34_4	female	SRP135960	CD-1	MidbrainVentral	Ad17
SRR6854157	p26	RNA-Seq	GCF_000001635.20	98	17156662236	PRJNA438862	SAMN08730918	Model organism or animal	5483995737	SI-3A-E11	KAROLINSKA INSTITUTE	public	TenX,sra	s3	s3.us-east-1	SRX3809293	Illumina HiSeq 2500	10X35_3	SINGLE	Oligo-dT	TRANSCRIPTOMIC	Mus musculus	ILLUMINA	2018-04-04T00:00:00Z	10X35_3	female	SRP135960	CD-1	Hypothalamus	Ad18
SRR6854158	p26	RNA-Seq	GCF_000001635.20	98	16772573090	PRJNA438862	SAMN08730917	Model organism or animal	5691041799	SI-3A-D11	KAROLINSKA INSTITUTE	public	sra,TenX	s3	s3.us-east-1	SRX3809292	Illumina HiSeq 2500	10X35_2	SINGLE	Oligo-dT	TRANSCRIPTOMIC	Mus musculus	ILLUMINA	2018-04-04T00:00:00Z	10X35_2	female	SRP135960	CD-1	Ctx2	Ad18
SRR6854159	p27	RNA-Seq	GCF_000001635.20	98	17253270930	PRJNA438862	SAMN08730920	Model organism or animal	5087205098	SI-3A-G11	KAROLINSKA INSTITUTE	public	TenX,sra	s3	s3.us-east-1	SRX3809291	Illumina HiSeq 2500	10X36_1	SINGLE	Oligo-dT	TRANSCRIPTOMIC	Mus musculus	ILLUMINA	2018-04-04T00:00:00Z	10X36_1	pooled male and female	SRP135960	vGat-tdTomato	CA1	CAint05\, CAint06\, CAint07
SRR6854160	p26	RNA-Seq	GCF_000001635.20	98	17569467636	PRJNA438862	SAMN08730919	Model organism or animal	5443068403	SI-3A-F11	KAROLINSKA INSTITUTE	public	TenX,sra	s3	s3.us-east-1	SRX3809290	Illumina HiSeq 2500	10X35_4	SINGLE	Oligo-dT	TRANSCRIPTOMIC	Mus musculus	ILLUMINA	2018-04-04T00:00:00Z	10X35_4	female	SRP135960	CD-1	Hypothalamus	Ad18
SRR6854161	p25	RNA-Seq	GCF_000001635.20	98	15456802452	PRJNA438862	SAMN08730902	Model organism or animal	5876942896	SI-3A-C8	KAROLINSKA INSTITUTE	public	TenX,sra	s3	s3.us-east-1	SRX3809289	Illumina HiSeq 2500	10X26_3	SINGLE	Oligo-dT	TRANSCRIPTOMIC	Mus musculus	ILLUMINA	2018-04-04T00:00:00Z	10X26_3	female	SRP135960	CD-1	StriatumVentral	Ad13
SRR6854162	p25	RNA-Seq	GCF_000001635.20	98	17225914230	PRJNA438862	SAMN08730901	Model organism or animal	5145446561	SI-3A-H5	KAROLINSKA INSTITUTE	public	sra,TenX	s3	s3.us-east-1	SRX3809288	Illumina HiSeq 2500	10X26_2	SINGLE	Oligo-dT	TRANSCRIPTOMIC	Mus musculus	ILLUMINA	2018-04-04T00:00:00Z	10X26_2	female	SRP135960	CD-1	CB	Ad13
SRR6854163	p25	RNA-Seq	GCF_000001635.20	98	18373475904	PRJNA438862	SAMN08730900	Model organism or animal	5744332948	SI-3A-G5	KAROLINSKA INSTITUTE	public	TenX,sra	s3	s3.us-east-1	SRX3809287	Illumina HiSeq 2500	10X26_1	SINGLE	Oligo-dT	TRANSCRIPTOMIC	Mus musculus	ILLUMINA	2018-04-04T00:00:00Z	10X26_1	female	SRP135960	CD-1	CB	Ad13
SRR6854164	p24	RNA-Seq	GCF_000001635.20	98	17175452756	PRJNA438862	SAMN08730899	Model organism or animal	5856479465	SI-3A-F5	KAROLINSKA INSTITUTE	public	TenX,sra	s3	s3.us-east-1	SRX3809286	Illumina HiSeq 2500	10X24_4	SINGLE	Oligo-dT	TRANSCRIPTOMIC	Mus musculus	ILLUMINA	2018-04-04T00:00:00Z	10X24_4	male	SRP135960	CD-1	Thalamus	Ad12
SRR6854165	p24	RNA-Seq	GCF_000001635.20	98	17336599644	PRJNA438862	SAMN08730898	Model organism or animal	5879307307	SI-3A-E5	KAROLINSKA INSTITUTE	public	TenX,sra	s3	s3.us-east-1	SRX3809285	Illumina HiSeq 2500	10X24_3	SINGLE	Oligo-dT	TRANSCRIPTOMIC	Mus musculus	ILLUMINA	2018-04-04T00:00:00Z	10X24_3	male	SRP135960	CD-1	Thalamus	Ad12
SRR6854166	p24	RNA-Seq	GCF_000001635.20	98	16320258990	PRJNA438862	SAMN08730897	Model organism or animal	6010932997	SI-3A-B8	KAROLINSKA INSTITUTE	public	sra,TenX	s3	s3.us-east-1	SRX3809284	Illumina HiSeq 2500	10X24_2	SINGLE	Oligo-dT	TRANSCRIPTOMIC	Mus musculus	ILLUMINA	2018-04-04T00:00:00Z	10X24_2	male	SRP135960	CD-1	StriatumDorsal	Ad12
SRR6854167	p24	RNA-Seq	GCF_000001635.20	98	16159728228	PRJNA438862	SAMN08730896	Model organism or animal	5645416826	SI-3A-A8	KAROLINSKA INSTITUTE	public	TenX,sra	s3	s3.us-east-1	SRX3809283	Illumina HiSeq 2500	10X24_1	SINGLE	Oligo-dT	TRANSCRIPTOMIC	Mus musculus	ILLUMINA	2018-04-04T00:00:00Z	10X24_1	male	SRP135960	CD-1	StriatumDorsal	Ad12
SRR6854168	p23	RNA-Seq	GCF_000001635.20	98	17310947458	PRJNA438862	SAMN08730895	Model organism or animal	5709565061	SI-3A-H7	KAROLINSKA INSTITUTE	public	TenX,sra	s3	s3.us-east-1	SRX3809282	Illumina HiSeq 2500	10X22_4	SINGLE	Oligo-dT	TRANSCRIPTOMIC	Mus musculus	ILLUMINA	2018-04-04T00:00:00Z	10X22_4	male	SRP135960	CD-1	HC	Ad11
SRR6854169	p23	RNA-Seq	GCF_000001635.20	98	17758745620	PRJNA438862	SAMN08730894	Model organism or animal	5565132997	SI-3A-G7	KAROLINSKA INSTITUTE	public	TenX,sra	s3	s3.us-east-1	SRX3809281	Illumina HiSeq 2500	10X22_3	SINGLE	Oligo-dT	TRANSCRIPTOMIC	Mus musculus	ILLUMINA	2018-04-04T00:00:00Z	10X22_3	male	SRP135960	CD-1	HC	Ad11
SRR6854170	p23	RNA-Seq	GCF_000001635.20	98	17374563080	PRJNA438862	SAMN08730893	Model organism or animal	5627937514	SI-3A-F7	KAROLINSKA INSTITUTE	public	TenX,sra	s3	s3.us-east-1	SRX3809280	Illumina HiSeq 2500	10X22_2	SINGLE	Oligo-dT	TRANSCRIPTOMIC	Mus musculus	ILLUMINA	2018-04-04T00:00:00Z	10X22_2	male	SRP135960	CD-1	Ctx1	Ad11
SRR6854171	p21	RNA-Seq	GCF_000001635.20	98	9095607654	PRJNA438862	SAMN08731003	Model organism or animal	3153582578	SI-3A-F1	KAROLINSKA INSTITUTE	public	sra,TenX	s3	s3.us-east-1	SRX3809279	Illumina HiSeq 2500	10X87_4	SINGLE	Oligo-dT	TRANSCRIPTOMIC	Mus musculus	ILLUMINA	2018-04-04T00:00:00Z	10X87_4	missing	SRP135960	missing	Thalamus	Ad37\,Ad38
SRR6854172	p16\, p24	RNA-Seq	GCF_000001635.20	98	17754240266	PRJNA438862	SAMN08730931	Model organism or animal	5719787266	SI-3A-H12	KAROLINSKA INSTITUTE	public	sra,TenX	s3	s3.us-east-1	SRX3809278	Illumina HiSeq 2500	10X46_3	SINGLE	Oligo-dT	TRANSCRIPTOMIC	Mus musculus	ILLUMINA	2018-04-04T00:00:00Z	10X46_3	pooled male and female	SRP135960	CD-1	StriatumVentral	Ad22\, Ad23
SRR6854173	p20	RNA-Seq	GCF_000001635.20	98	17824940798	PRJNA438862	SAMN08730932	Model organism or animal	4770807897	SI-3A-D7	KAROLINSKA INSTITUTE	public	sra,TenX	s3	s3.us-east-1	SRX3809277	Illumina HiSeq 2500	10X48_1	SINGLE	Oligo-dT	TRANSCRIPTOMIC	Mus musculus	ILLUMINA	2018-04-04T00:00:00Z	10X48_1	pooled male and female	SRP135960	CD-1	Medulla	Pdgfra01\, Pdgfra02
SRR6854174	p60	RNA-Seq	GCF_000001635.20	98	17171628208	PRJNA438862	SAMN08730925	Model organism or animal	5355261477	SI-3A-D12	KAROLINSKA INSTITUTE	public	sra,TenX	s3	s3.us-east-1	SRX3809276	Illumina HiSeq 2500	10X38_3	SINGLE	Oligo-dT	TRANSCRIPTOMIC	Mus musculus	ILLUMINA	2018-04-04T00:00:00Z	10X38_3	pooled male and female	SRP135960	vGat-tdTomato	Ctx1.5	CAint08\, CAint09\, CAint10
SRR6854175	p12\, p35	RNA-Seq	GCF_000001635.20	98	17093449884	PRJNA438862	SAMN08730926	Model organism or animal	5764487509	SI-3A-E12	KAROLINSKA INSTITUTE	public	sra,TenX	s3	s3.us-east-1	SRX3809275	Illumina HiSeq 2500	10X43_1	SINGLE	Oligo-dT	TRANSCRIPTOMIC	Mus musculus	ILLUMINA	2018-04-04T00:00:00Z	10X43_1	pooled male and female	SRP135960	CD-1	DentGyr	Ad19\, Ad20
SRR6854176	p60	RNA-Seq	GCF_000001635.20	98	17203210864	PRJNA438862	SAMN08730923	Model organism or animal	5141577831	SI-3A-B12	KAROLINSKA INSTITUTE	public	TenX,sra	s3	s3.us-east-1	SRX3809274	Illumina HiSeq 2500	10X38_1	SINGLE	Oligo-dT	TRANSCRIPTOMIC	Mus musculus	ILLUMINA	2018-04-04T00:00:00Z	10X38_1	pooled male and female	SRP135960	vGat-tdTomato	CA1	CAint08\, CAint09\, CAint10
SRR6854177	p60	RNA-Seq	GCF_000001635.20	98	17344066950	PRJNA438862	SAMN08730924	Model organism or animal	5741826030	SI-3A-C12	KAROLINSKA INSTITUTE	public	TenX,sra	s3	s3.us-east-1	SRX3809273	Illumina HiSeq 2500	10X38_2	SINGLE	Oligo-dT	TRANSCRIPTOMIC	Mus musculus	ILLUMINA	2018-04-04T00:00:00Z	10X38_2	pooled male and female	SRP135960	vGat-tdTomato	CA1	CAint08\, CAint09\, CAint10
SRR6854178	p16\, p24	RNA-Seq	GCF_000001635.20	98	16997277780	PRJNA438862	SAMN08730929	Model organism or animal	6229996476	SI-3A-H12	KAROLINSKA INSTITUTE	public	sra,TenX	s3	s3.us-east-1	SRX3809272	Illumina HiSeq 2500	10X46_1	SINGLE	Oligo-dT	TRANSCRIPTOMIC	Mus musculus	ILLUMINA	2018-04-04T00:00:00Z	10X46_1	pooled male and female	SRP135960	CD-1	DentGyr	Ad22\, Ad23
SRR6854179	p16\, p24	RNA-Seq	GCF_000001635.20	98	9052657488	PRJNA438862	SAMN08730930	Model organism or animal	3005581418	SI-3A-H11	KAROLINSKA INSTITUTE	public	TenX,sra	s3	s3.us-east-1	SRX3809271	Illumina HiSeq 2500	10X46_2	SINGLE	Oligo-dT	TRANSCRIPTOMIC	Mus musculus	ILLUMINA	2018-04-04T00:00:00Z	10X46_2	pooled male and female	SRP135960	CD-1	StriatumVentral	Ad22\, Ad23
SRR6854180	p20	RNA-Seq	GCF_000001635.20	98	17488085202	PRJNA438862	SAMN08730927	Model organism or animal	5838699535	SI-3A-F12	KAROLINSKA INSTITUTE	public	sra,TenX	s3	s3.us-east-1	SRX3809270	Illumina HiSeq 2500	10X43_2	SINGLE	Oligo-dT	TRANSCRIPTOMIC	Mus musculus	ILLUMINA	2018-04-04T00:00:00Z	10X43_2	male	SRP135960	CD-1	DRG	Ad21
SRR6854181	p20	RNA-Seq	GCF_000001635.20	98	18302062422	PRJNA438862	SAMN08730928	Model organism or animal	6279250986	SI-3A-G12	KAROLINSKA INSTITUTE	public	TenX,sra	s3	s3.us-east-1	SRX3809269	Illumina HiSeq 2500	10X43_3	SINGLE	Oligo-dT	TRANSCRIPTOMIC	Mus musculus	ILLUMINA	2018-04-04T00:00:00Z	10X43_3	male	SRP135960	CD-1	SC	Ad21

## Sheet: PRJNA453138
Run	Assay Type	AssemblyName	AvgSpotLen	Bases	BioProject	BioSample	brain_region	Bytes	Center Name	Consent	DATASTORE filetype	DATASTORE provider	DATASTORE region	Experiment	GEO_Accession (exp)	Instrument	LibraryLayout	LibrarySelection	LibrarySource	Organism	Platform	ReleaseDate	Sample Name	sex	source_name	SRA Study	Tissue
SRR7059018	RNA-Seq	GCF_000001635.20	134	71881155824	PRJNA453138	SAMN08975395	Preoptic region of the hypothalamus	29738520461	GEO	public	sra,TenX	s3	s3.us-east-1	SRX3989977	GSM3109253	NextSeq 500	PAIRED	cDNA	TRANSCRIPTOMIC	Mus musculus	ILLUMINA	2018-11-04T00:00:00Z	GSM3109253	female	Preoptic region of the hypothalamus	SRP142447	brain
SRR7059019	RNA-Seq	GCF_000001635.20	134	136979694618	PRJNA453138	SAMN08975394	Preoptic region of the hypothalamus	59400457031	GEO	public	sra,TenX	s3	s3.us-east-1	SRX3989978	GSM3109254	NextSeq 500	PAIRED	cDNA	TRANSCRIPTOMIC	Mus musculus	ILLUMINA	2018-11-04T00:00:00Z	GSM3109254	female	Preoptic region of the hypothalamus	SRP142447	brain
SRR7059020	RNA-Seq	GCF_000001635.20	134	40945278252	PRJNA453138	SAMN08975393	Preoptic region of the hypothalamus	17835231549	GEO	public	TenX,sra	s3	s3.us-east-1	SRX3989979	GSM3109255	NextSeq 500	PAIRED	cDNA	TRANSCRIPTOMIC	Mus musculus	ILLUMINA	2018-11-04T00:00:00Z	GSM3109255	female	Preoptic region of the hypothalamus	SRP142447	brain
SRR7059021	RNA-Seq	GCF_000001635.20	134	111339832180	PRJNA453138	SAMN08975392	Preoptic region of the hypothalamus	47356948174	GEO	public	TenX,sra	s3	s3.us-east-1	SRX3989980	GSM3109256	NextSeq 500	PAIRED	cDNA	TRANSCRIPTOMIC	Mus musculus	ILLUMINA	2018-11-04T00:00:00Z	GSM3109256	male	Preoptic region of the hypothalamus	SRP142447	brain
SRR7059022	RNA-Seq	GCF_000001635.20	134	117687465646	PRJNA453138	SAMN08975391	Preoptic region of the hypothalamus	55665065629	GEO	public	TenX,sra	s3	s3.us-east-1	SRX3989981	GSM3109257	NextSeq 500	PAIRED	cDNA	TRANSCRIPTOMIC	Mus musculus	ILLUMINA	2018-11-04T00:00:00Z	GSM3109257	male	Preoptic region of the hypothalamus	SRP142447	brain
SRR7059023	RNA-Seq	GCF_000001635.20	134	50616104616	PRJNA453138	SAMN08975390	Preoptic region of the hypothalamus	24282562126	GEO	public	TenX,sra	s3	s3.us-east-1	SRX3989982	GSM3109258	NextSeq 500	PAIRED	cDNA	TRANSCRIPTOMIC	Mus musculus	ILLUMINA	2018-11-04T00:00:00Z	GSM3109258	male	Preoptic region of the hypothalamus	SRP142447	brain

## Sheet: PRJNA515063
Run	Age	animal_numbers	Assay Type	AvgSpotLen	Bases	BioProject	BioSample	brain_region	Bytes	Center Name	Consent	DATASTORE filetype	DATASTORE provider	DATASTORE region	Experiment	GEO_Accession (exp)	Instrument	LibraryLayout	LibrarySelection	LibrarySource	Organism	Platform	ReleaseDate	Sample Name	sex	source_name	SRA Study	Strain	Tissue
SRR8441476	P30	3	RNA-Seq	132	47896895244	PRJNA515063	SAMN10741814	lateral hypothalamic area	24221889836	GEO	public	sra,fastq	s3	s3.us-east-1	SRX5248794	GSM3562050	Illumina HiSeq 4000	PAIRED	cDNA	TRANSCRIPTOMIC	Mus musculus	ILLUMINA	2019-01-23T00:00:00Z	GSM3562050	male	lateral hypothalamic area	SRP179101	C57BL/6	brain
SRR8441477	P30	2	RNA-Seq	132	48896313972	PRJNA515063	SAMN10741813	lateral hypothalamic area	24092997552	GEO	public	fastq,sra	s3	s3.us-east-1	SRX5248795	GSM3562051	Illumina HiSeq 4000	PAIRED	cDNA	TRANSCRIPTOMIC	Mus musculus	ILLUMINA	2019-01-23T00:00:00Z	GSM3562051	female	lateral hypothalamic area	SRP179101	C57BL/6	brain

## Sheet: PRJNA547712
Run	Age	Assay Type	AssemblyName	AvgSpotLen	Bases	BioProject	BioSample	Bytes	Center Name	Consent	DATASTORE filetype	DATASTORE provider	DATASTORE region	Experiment	Genotype	Instrument	LibraryLayout	LibrarySelection	LibrarySource	Organism	Platform	ReleaseDate	Sample Name	source_name	SRA Study	Strain	Tissue
SRR9214090	embryonic 10 days	RNA-Seq	MM10	98	10087876764	PRJNA547712	SAMN11975095	5592016263	GEO	public	sra,TenX	ncbi,s3	ncbi.public,s3.us-east-1	SRX5984832	wild type	NextSeq 500	PAIRED	cDNA	TRANSCRIPTOMIC	Mus musculus	ILLUMINA	2020-08-10T00:00:00Z	GSM3860733	Hypothalamus	SRP200721	CD1	Hypothalamus
SRR9214091	embryonic 11 days	RNA-Seq	MM10	98	12583361700	PRJNA547712	SAMN11975094	5470242269	GEO	public	sra,TenX	ncbi,s3	ncbi.public,s3.us-east-1	SRX5984833	wild type	NextSeq 500	PAIRED	cDNA	TRANSCRIPTOMIC	Mus musculus	ILLUMINA	2020-08-10T00:00:00Z	GSM3860734	Hypothalamus	SRP200721	CD1	Hypothalamus
SRR9214092	embryonic 12 days	RNA-Seq	MM10	98	7450495472	PRJNA547712	SAMN11975093	3987568007	GEO	public	sra,TenX	s3,ncbi	ncbi.public,s3.us-east-1	SRX5984834	wild type	NextSeq 500	PAIRED	cDNA	TRANSCRIPTOMIC	Mus musculus	ILLUMINA	2020-08-10T00:00:00Z	GSM3860735	Hypothalamus	SRP200721	CD1	Hypothalamus
SRR9214093	embryonic 13 days	RNA-Seq	MM10	98	15254947638	PRJNA547712	SAMN11975092	6534484841	GEO	public	TenX,sra	ncbi,s3	s3.us-east-1,ncbi.public	SRX5984835	wild type	NextSeq 500	PAIRED	cDNA	TRANSCRIPTOMIC	Mus musculus	ILLUMINA	2020-08-10T00:00:00Z	GSM3860736	Hypothalamus	SRP200721	CD1	Hypothalamus
SRR9214094	embryonic 14 days	RNA-Seq	MM10	98	11766054538	PRJNA547712	SAMN11975091	5417948110	GEO	public	TenX,sra	ncbi,s3	ncbi.public,s3.us-east-1	SRX5984836	wild type	NextSeq 500	PAIRED	cDNA	TRANSCRIPTOMIC	Mus musculus	ILLUMINA	2020-08-10T00:00:00Z	GSM3860737	Hypothalamus	SRP200721	CD1	Hypothalamus
SRR9214095	embryonic 15 days	RNA-Seq	MM10	98	9663745602	PRJNA547712	SAMN11975090	4994487561	GEO	public	TenX,sra	ncbi,s3	s3.us-east-1,ncbi.public	SRX5984837	wild type	NextSeq 500	PAIRED	cDNA	TRANSCRIPTOMIC	Mus musculus	ILLUMINA	2020-08-10T00:00:00Z	GSM3860738	Hypothalamus	SRP200721	CD1	Hypothalamus
SRR9214096	embryonic 15 days	RNA-Seq	MM10	98	13639252606	PRJNA547712	SAMN11975089	6224872453	GEO	public	TenX,sra	s3,ncbi	s3.us-east-1,ncbi.public	SRX5984838	wild type	NextSeq 500	PAIRED	cDNA	TRANSCRIPTOMIC	Mus musculus	ILLUMINA	2020-08-10T00:00:00Z	GSM3860739	Hypothalamus	SRP200721	CD1	Hypothalamus
SRR9214097	embryonic 16 days	RNA-Seq	MM10	98	11120880848	PRJNA547712	SAMN11975088	5183848388	GEO	public	TenX,sra	ncbi,s3	s3.us-east-1,ncbi.public	SRX5984839	wild type	NextSeq 500	PAIRED	cDNA	TRANSCRIPTOMIC	Mus musculus	ILLUMINA	2020-08-10T00:00:00Z	GSM3860740	Hypothalamus	SRP200721	CD1	Hypothalamus
SRR9214098	embryonic 16 days	RNA-Seq	MM10	99	1521222021	PRJNA547712	SAMN11975087	736288189	GEO	public	TenX,sra	s3,ncbi	s3.us-east-1,ncbi.public	SRX5984840	wild type	NextSeq 500	PAIRED	cDNA	TRANSCRIPTOMIC	Mus musculus	ILLUMINA	2020-08-10T00:00:00Z	GSM3860741	Hypothalamus	SRP200721	C57BL/6J	Hypothalamus
SRR9214099	embryonic 18 days	RNA-Seq	MM10	98	13568919476	PRJNA547712	SAMN11975086	6332493725	GEO	public	TenX,sra	s3,ncbi	s3.us-east-1,ncbi.public	SRX5984841	wild type	NextSeq 500	PAIRED	cDNA	TRANSCRIPTOMIC	Mus musculus	ILLUMINA	2020-08-10T00:00:00Z	GSM3860742	Hypothalamus	SRP200721	CD1	Hypothalamus
SRR9214100	postnatal 4 days	RNA-Seq	MM10	98	15384852616	PRJNA547712	SAMN11975085	6412199073	GEO	public	TenX,sra	s3,ncbi	s3.us-east-1,ncbi.public	SRX5984842	wild type	NextSeq 500	PAIRED	cDNA	TRANSCRIPTOMIC	Mus musculus	ILLUMINA	2020-08-10T00:00:00Z	GSM3860743	Hypothalamus	SRP200721	CD1	Hypothalamus
SRR9214101	postnatal 8 days	RNA-Seq	MM10	98	5445779052	PRJNA547712	SAMN11975084	2708146115	GEO	public	sra,TenX	s3,ncbi	s3.us-east-1,ncbi.public	SRX5984843	wild type	NextSeq 500	PAIRED	cDNA	TRANSCRIPTOMIC	Mus musculus	ILLUMINA	2020-08-10T00:00:00Z	GSM3860744	Hypothalamus	SRP200721	CD1	Hypothalamus
SRR9214102	postnatal 14 days	RNA-Seq	MM10	98	13510820372	PRJNA547712	SAMN11975083	6224730017	GEO	public	TenX,sra	s3,ncbi	s3.us-east-1,ncbi.public	SRX5984844	wild type	NextSeq 500	PAIRED	cDNA	TRANSCRIPTOMIC	Mus musculus	ILLUMINA	2020-08-10T00:00:00Z	GSM3860745	Hypothalamus	SRP200721	CD1	Hypothalamus
SRR9214103	postnatal 45 days	RNA-Seq	MM10	98	13186173224	PRJNA547712	SAMN11975082	5890406513	GEO	public	TenX,sra	ncbi,s3	ncbi.public,s3.us-east-1	SRX5984845	wild type	NextSeq 500	PAIRED	cDNA	TRANSCRIPTOMIC	Mus musculus	ILLUMINA	2020-08-10T00:00:00Z	GSM3860746	Hypothalamus	SRP200721	C57BL/6J	Hypothalamus
SRR9214104	postnatal 45 days	RNA-Seq	MM10	98	11582268474	PRJNA547712	SAMN11975081	5233579660	GEO	public	TenX,sra	ncbi,s3	s3.us-east-1,ncbi.public	SRX5984846	wild type	NextSeq 500	PAIRED	cDNA	TRANSCRIPTOMIC	Mus musculus	ILLUMINA	2020-08-10T00:00:00Z	GSM3860747	Hypothalamus	SRP200721	C57BL/6J	Hypothalamus
SRR9214105	embryonic 12 days	RNA-Seq	MM10	98	19992418166	PRJNA547712	SAMN11975080	7884408542	GEO	public	TenX,sra	s3,ncbi	ncbi.public,s3.us-east-1	SRX5984847	wild type	NextSeq 500	PAIRED	cDNA	TRANSCRIPTOMIC	Mus musculus	ILLUMINA	2020-08-10T00:00:00Z	GSM3860748	Hypothalamus	SRP200721	CD1 & C57BL/6J	Hypothalamus
SRR9214106	embryonic 12 days	RNA-Seq	MM10	98	18611893734	PRJNA547712	SAMN11975079	7384742723	GEO	public	TenX,sra	ncbi,s3	ncbi.public,s3.us-east-1	SRX5984848	mutant	NextSeq 500	PAIRED	cDNA	TRANSCRIPTOMIC	Mus musculus	ILLUMINA	2020-08-10T00:00:00Z	GSM3860749	Hypothalamus	SRP200721	CD1 & C57BL/6J	Hypothalamus
SRR9214107	embryonic 12 days	RNA-Seq	MM10	98	17861416202	PRJNA547712	SAMN11975078	7081212277	GEO	public	sra,TenX	ncbi,s3	s3.us-east-1,ncbi.public	SRX5984849	mutant	NextSeq 500	PAIRED	cDNA	TRANSCRIPTOMIC	Mus musculus	ILLUMINA	2020-08-10T00:00:00Z	GSM3860750	Hypothalamus	SRP200721	CD1 & C57BL/6J	Hypothalamus
SRR9214108	embryonic 12 days	RNA-Seq	MM10	98	18087888126	PRJNA547712	SAMN11975077	7060667128	GEO	public	TenX,sra	ncbi,s3	s3.us-east-1,ncbi.public	SRX5984850	wild type	NextSeq 500	PAIRED	cDNA	TRANSCRIPTOMIC	Mus musculus	ILLUMINA	2020-08-10T00:00:00Z	GSM3860751	Hypothalamus	SRP200721	C57BL/6J	Hypothalamus
SRR9214109	embryonic 12 days	RNA-Seq	MM10	98	20030812018	PRJNA547712	SAMN11975076	7442713151	GEO	public	TenX,sra	s3,ncbi	ncbi.public,s3.us-east-1	SRX5984851	mutant	NextSeq 500	PAIRED	cDNA	TRANSCRIPTOMIC	Mus musculus	ILLUMINA	2020-08-10T00:00:00Z	GSM3860752	Hypothalamus	SRP200721	C57BL/6J	Hypothalamus
SRR9214110	embryonic 12 days	RNA-Seq	MM10	98	20885167982	PRJNA547712	SAMN11975075	7514605571	GEO	public	sra,TenX	s3,ncbi	s3.us-east-1,ncbi.public	SRX5984852	mutant	NextSeq 500	PAIRED	cDNA	TRANSCRIPTOMIC	Mus musculus	ILLUMINA	2020-08-10T00:00:00Z	GSM3860753	Hypothalamus	SRP200721	C57BL/6J	Hypothalamus
SRR9214111	embryonic 12 days	RNA-Seq	MM10	98	18174446234	PRJNA547712	SAMN11975074	6959314676	GEO	public	TenX,sra	ncbi,s3	ncbi.public,s3.us-east-1	SRX5984853	wild type	NextSeq 500	PAIRED	cDNA	TRANSCRIPTOMIC	Mus musculus	ILLUMINA	2020-08-10T00:00:00Z	GSM3860754	Hypothalamus	SRP200721	CD1 & C57BL/6J	Hypothalamus
SRR9214112	embryonic 12 days	RNA-Seq	MM10	98	18786607644	PRJNA547712	SAMN11975073	6679476201	GEO	public	sra,TenX	s3,ncbi	s3.us-east-1,ncbi.public	SRX5984854	mutant	NextSeq 500	PAIRED	cDNA	TRANSCRIPTOMIC	Mus musculus	ILLUMINA	2020-08-10T00:00:00Z	GSM3860755	Hypothalamus	SRP200721	CD1 & C57BL/6J	Hypothalamus
SRR9214113	embryonic 12 days	RNA-Seq	MM10	98	18601931740	PRJNA547712	SAMN11975072	6477288320	GEO	public	sra,TenX	ncbi,s3	ncbi.public,s3.us-east-1	SRX5984855	mutant	NextSeq 500	PAIRED	cDNA	TRANSCRIPTOMIC	Mus musculus	ILLUMINA	2020-08-10T00:00:00Z	GSM3860756	Hypothalamus	SRP200721	CD1 & C57BL/6J	Hypothalamus
SRR9214114	embryonic 12 days	RNA-Seq	MM10	98	17412274558	PRJNA547712	SAMN11975071	6922014230	GEO	public	sra,TenX	s3,ncbi	ncbi.public,s3.us-east-1	SRX5984856	wild type	NextSeq 500	PAIRED	cDNA	TRANSCRIPTOMIC	Mus musculus	ILLUMINA	2020-08-10T00:00:00Z	GSM3860757	Hypothalamus	SRP200721	CD1 & C57BL/6J	Hypothalamus
SRR9214115	embryonic 12 days	RNA-Seq	MM10	98	18587770544	PRJNA547712	SAMN11975097	7426549185	GEO	public	sra,TenX	ncbi,s3	ncbi.public,s3.us-east-1	SRX5984857	mutant	NextSeq 500	PAIRED	cDNA	TRANSCRIPTOMIC	Mus musculus	ILLUMINA	2020-08-10T00:00:00Z	GSM3860758	Hypothalamus	SRP200721	CD1 & C57BL/6J	Hypothalamus
SRR9214116	embryonic 12 days	RNA-Seq	MM10	98	21641882724	PRJNA547712	SAMN11975096	8318433051	GEO	public	TenX,sra	ncbi,s3	s3.us-east-1,ncbi.public	SRX5984858	mutant	NextSeq 500	PAIRED	cDNA	TRANSCRIPTOMIC	Mus musculus	ILLUMINA	2020-08-10T00:00:00Z	GSM3860759	Hypothalamus	SRP200721	CD1 & C57BL/6J	Hypothalamus

## Sheet: PRJNA548532
Run	Age	Assay Type	AvgSpotLen	Bases	BioProject	BioSample	Bytes	Center Name	Consent	DATASTORE filetype	DATASTORE provider	DATASTORE region	Experiment	GEO_Accession (exp)	Instrument	LibraryLayout	LibrarySelection	LibrarySource	Organism	Platform	ReleaseDate	Sample Name	sampling_enviroment	source_name	SRA Study	Strain	Tissue
SRR9280653	8 weeks	RNA-Seq	132	21079966776	PRJNA548532	SAMN12039425	19662414722	GEO	public	sra,fastq	s3	s3.us-east-1	SRX6050379	GSM3880020	Illumina HiSeq X Ten	PAIRED	cDNA	TRANSCRIPTOMIC	Mus musculus	ILLUMINA	2019-06-20T00:00:00Z	GSM3880020	constant dark	suprachiasmatic nucleus	SRP201224	C57BL/6	suprachiasmatic nucleus
SRR9280654	8 weeks	RNA-Seq	132	21110871408	PRJNA548532	SAMN12039425	19693054515	GEO	public	sra,fastq	s3	s3.us-east-1	SRX6050379	GSM3880020	Illumina HiSeq X Ten	PAIRED	cDNA	TRANSCRIPTOMIC	Mus musculus	ILLUMINA	2019-06-20T00:00:00Z	GSM3880020	constant dark	suprachiasmatic nucleus	SRP201224	C57BL/6	suprachiasmatic nucleus

## Sheet: PRJNA548917
Run	Age	Assay Type	AvgSpotLen	Bases	BioProject	BioSample	Bytes	Center Name	Consent	DATASTORE filetype	DATASTORE provider	DATASTORE region	Experiment	Genotype	GEO_Accession (exp)	Instrument	libbatch	LibraryLayout	LibrarySelection	LibrarySource	Organism	Platform	ReleaseDate	Sample Name	source_name	SRA Study	Strain	Tissue
SRR9303096	E17	RNA-Seq	187	8859780996	PRJNA548917	SAMN12058575	5155041478	GEO	public	sra,fastq	s3	s3.us-east-1	SRX6071801	wild type	GSM3890935	Illumina HiSeq 4000	2	PAIRED	cDNA	TRANSCRIPTOMIC	Mus musculus	ILLUMINA	2020-05-06T00:00:00Z	GSM3890935	Hypothalamus	SRP201462	C57BL/6J	Hypothalamus
SRR9303097	P00	RNA-Seq	187	9321713445	PRJNA548917	SAMN12058574	5446937815	GEO	public	sra,fastq	ncbi,s3	ncbi.public,s3.us-east-1	SRX6071802	wild type	GSM3890936	Illumina HiSeq 4000	2	PAIRED	cDNA	TRANSCRIPTOMIC	Mus musculus	ILLUMINA	2020-05-06T00:00:00Z	GSM3890936	Hypothalamus	SRP201462	C57BL/6J	Hypothalamus
SRR9303098	P00	RNA-Seq	187	9351397638	PRJNA548917	SAMN12058574	5458350731	GEO	public	sra,fastq	s3	s3.us-east-1	SRX6071802	wild type	GSM3890936	Illumina HiSeq 4000	2	PAIRED	cDNA	TRANSCRIPTOMIC	Mus musculus	ILLUMINA	2020-05-06T00:00:00Z	GSM3890936	Hypothalamus	SRP201462	C57BL/6J	Hypothalamus
SRR9303099	P02	RNA-Seq	187	8980315025	PRJNA548917	SAMN12058573	5197980850	GEO	public	sra,fastq	s3	s3.us-east-1	SRX6071803	wild type	GSM3890937	Illumina HiSeq 4000	2	PAIRED	cDNA	TRANSCRIPTOMIC	Mus musculus	ILLUMINA	2020-05-06T00:00:00Z	GSM3890937	Hypothalamus	SRP201462	C57BL/6J	Hypothalamus
SRR9303100	P02	RNA-Seq	187	9031992662	PRJNA548917	SAMN12058573	5221638056	GEO	public	fastq,sra	s3	s3.us-east-1	SRX6071803	wild type	GSM3890937	Illumina HiSeq 4000	2	PAIRED	cDNA	TRANSCRIPTOMIC	Mus musculus	ILLUMINA	2020-05-06T00:00:00Z	GSM3890937	Hypothalamus	SRP201462	C57BL/6J	Hypothalamus
SRR9303101	P02	RNA-Seq	183	27759830895	PRJNA548917	SAMN12058581	16531199521	GEO	public	sra,fastq	s3,gs	gs.US,s3.us-east-1	SRX6071804	wild type	GSM3890938	Illumina HiSeq 4000	3	PAIRED	cDNA	TRANSCRIPTOMIC	Mus musculus	ILLUMINA	2020-05-06T00:00:00Z	GSM3890938	Hypothalamus	SRP201462	C57BL/6J	Hypothalamus
SRR9303102	P10	RNA-Seq	182	17443850970	PRJNA548917	SAMN12058580	10072909938	GEO	public	sra,fastq	s3	s3.us-east-1	SRX6071805	wild type	GSM3890939	Illumina HiSeq 4000	1	PAIRED	cDNA	TRANSCRIPTOMIC	Mus musculus	ILLUMINA	2020-05-06T00:00:00Z	GSM3890939	Hypothalamus	SRP201462	C57BL/6J	Hypothalamus
SRR9303103	P10	RNA-Seq	187	9556498116	PRJNA548917	SAMN12058579	5557027027	GEO	public	sra,fastq	s3	s3.us-east-1	SRX6071806	wild type	GSM3890940	Illumina HiSeq 4000	2	PAIRED	cDNA	TRANSCRIPTOMIC	Mus musculus	ILLUMINA	2020-05-06T00:00:00Z	GSM3890940	Hypothalamus	SRP201462	C57BL/6J	Hypothalamus
SRR9303104	P10	RNA-Seq	187	9591736209	PRJNA548917	SAMN12058579	5570732548	GEO	public	sra,fastq	s3	s3.us-east-1	SRX6071806	wild type	GSM3890940	Illumina HiSeq 4000	2	PAIRED	cDNA	TRANSCRIPTOMIC	Mus musculus	ILLUMINA	2020-05-06T00:00:00Z	GSM3890940	Hypothalamus	SRP201462	C57BL/6J	Hypothalamus
SRR9303105	P23	RNA-Seq	187	9165870824	PRJNA548917	SAMN12058578	5317589809	GEO	public	fastq,sra	s3	s3.us-east-1	SRX6071807	wild type	GSM3890941	Illumina HiSeq 4000	2	PAIRED	cDNA	TRANSCRIPTOMIC	Mus musculus	ILLUMINA	2020-05-06T00:00:00Z	GSM3890941	Hypothalamus	SRP201462	C57BL/6J	Hypothalamus
SRR9303106	P23	RNA-Seq	187	9202257097	PRJNA548917	SAMN12058578	5332318717	GEO	public	sra,fastq	s3	s3.us-east-1	SRX6071807	wild type	GSM3890941	Illumina HiSeq 4000	2	PAIRED	cDNA	TRANSCRIPTOMIC	Mus musculus	ILLUMINA	2020-05-06T00:00:00Z	GSM3890941	Hypothalamus	SRP201462	C57BL/6J	Hypothalamus
SRR9303107	E15	RNA-Seq	183	30370268250	PRJNA548917	SAMN12058576	17952316974	GEO	public	fastq,sra	s3	s3.us-east-1	SRX6071800	wild type	GSM3890934	Illumina HiSeq 4000	2	PAIRED	cDNA	TRANSCRIPTOMIC	Mus musculus	ILLUMINA	2020-05-06T00:00:00Z	GSM3890934	Hypothalamus	SRP201462	C57BL/6J	Hypothalamus
SRR9303108	E15	RNA-Seq	187	7432948369	PRJNA548917	SAMN12058576	4329603485	GEO	public	sra,fastq	ncbi,s3	s3.us-east-1,ncbi.public	SRX6071800	wild type	GSM3890934	Illumina HiSeq 4000	2	PAIRED	cDNA	TRANSCRIPTOMIC	Mus musculus	ILLUMINA	2020-05-06T00:00:00Z	GSM3890934	Hypothalamus	SRP201462	C57BL/6J	Hypothalamus
SRR9303109	E15	RNA-Seq	187	7459988569	PRJNA548917	SAMN12058576	4340277609	GEO	public	fastq,sra	s3	s3.us-east-1	SRX6071800	wild type	GSM3890934	Illumina HiSeq 4000	2	PAIRED	cDNA	TRANSCRIPTOMIC	Mus musculus	ILLUMINA	2020-05-06T00:00:00Z	GSM3890934	Hypothalamus	SRP201462	C57BL/6J	Hypothalamus
SRR9303110	E17	RNA-Seq	187	8807647079	PRJNA548917	SAMN12058575	5130036426	GEO	public	fastq,sra	s3	s3.us-east-1	SRX6071801	wild type	GSM3890935	Illumina HiSeq 4000	2	PAIRED	cDNA	TRANSCRIPTOMIC	Mus musculus	ILLUMINA	2020-05-06T00:00:00Z	GSM3890935	Hypothalamus	SRP201462	C57BL/6J	Hypothalamus

## Sheet: PRJNA604055
Run	Age	Assay Type	AvgSpotLen	Bases	BIOMATERIAL_PROVIDER	BioProject	BioSample	BioSampleModel	Bytes	Center Name	Consent	DATASTORE filetype	DATASTORE provider	DATASTORE region	dev_stage	Experiment	Instrument	Library Name	LibraryLayout	LibrarySelection	LibrarySource	Organism	Platform	ReleaseDate	Sample Name	sex	SRA Study	Strain	Tissue	TREATMENT
SRR10992871	18 wk	RNA-Seq	129	39064319736	The Jackson Laboratory	PRJNA604055	SAMN13950399	Model organism or animal	19804602789	UNIVERSITY OF IOWA	public	fastq,sra	s3,gs	gs.US,s3.us-east-1	adult	SRX7654159	Illumina HiSeq 4000	537-5_538-2H	PAIRED	RT-PCR	TRANSCRIPTOMIC	Mus musculus	ILLUMINA	2020-06-30T00:00:00Z	537-5_538-2H	male	SRP246230	C57BL/6J	arcuate nucleus of hypothalamus	45% HFD
SRR10992872	18 wk	RNA-Seq	129	42154092648	The Jackson Laboratory	PRJNA604055	SAMN13950398	Model organism or animal	20711725618	UNIVERSITY OF IOWA	public	sra,fastq	s3,gs	s3.us-east-1,gs.US	adult	SRX7654158	Illumina HiSeq 4000	537-1_537-3H	PAIRED	RT-PCR	TRANSCRIPTOMIC	Mus musculus	ILLUMINA	2020-06-30T00:00:00Z	537-1_537-3H	male	SRP246230	C57BL/6J	arcuate nucleus of hypothalamus	45% HFD rep 2
SRR10992873	18 wk	RNA-Seq	129	41017526925	The Jackson Laboratory	PRJNA604055	SAMN13950397	Model organism or animal	20372129682	UNIVERSITY OF IOWA	public	sra,fastq	gs,s3	gs.US,s3.us-east-1	adult	SRX7654157	Illumina HiSeq 4000	536-5C	PAIRED	RT-PCR	TRANSCRIPTOMIC	Mus musculus	ILLUMINA	2020-06-30T00:00:00Z	536-5C	male	SRP246230	C57BL/6J	arcuate nucleus of hypothalamus	Chow rep 3
SRR10992874	18 wk	RNA-Seq	129	37355156940	The Jackson Laboratory	PRJNA604055	SAMN13950396	Model organism or animal	18728782291	UNIVERSITY OF IOWA	public	sra,fastq	gs,s3	s3.us-east-1,gs.US	adult	SRX7654156	Illumina HiSeq 4000	536-3C	PAIRED	RT-PCR	TRANSCRIPTOMIC	Mus musculus	ILLUMINA	2020-06-30T00:00:00Z	536-3C	male	SRP246230	C57BL/6J	arcuate nucleus of hypothalamus	Chow rep 2
SRR10992875	18 wk	RNA-Seq	129	40126476453	The Jackson Laboratory	PRJNA604055	SAMN13950395	Model organism or animal	20623980707	UNIVERSITY OF IOWA	public	fastq,sra	gs,s3	gs.US,s3.us-east-1	adult	SRX7654155	Illumina HiSeq 4000	536-2_536-4H	PAIRED	RT-PCR	TRANSCRIPTOMIC	Mus musculus	ILLUMINA	2020-06-30T00:00:00Z	536-2_536-4H	male	SRP246230	C57BL/6J	arcuate nucleus of hypothalamus	45% HFD rep 1
SRR10992876	18 wk	RNA-Seq	129	36734832189	The Jackson Laboratory	PRJNA604055	SAMN13950394	Model organism or animal	19084131479	UNIVERSITY OF IOWA	public	fastq,sra	s3,gs	gs.US,s3.us-east-1	adult	SRX7654154	Illumina HiSeq 4000	536-1C	PAIRED	RT-PCR	TRANSCRIPTOMIC	Mus musculus	ILLUMINA	2020-06-30T00:00:00Z	536-1C	male	SRP246230	C57BL/6J	arcuate nucleus of hypothalamus	Chow rep 1

[truncated: 9 more sheets: PRJNA611624, PRJNA679294, PRJNA705596, PRJNA722418, PRJNA723345, PRJNA779749, PRJNA798401, PRJNA815819, PRJNA847050]
