# Supplementary material for: Molecularly stratified hypothalamic astrocytes are cellular foci for obesity
Source: Research Square preprint supplement (doi:10.21203/rs.3.rs-3748581/v1), 2024-02-09
Supplement: Supplementary file 4 [file 417a577320cdc49b5e6028e6.xlsx]

## Sheet: Inclusion_>=7_genes
marker_gene	min_n_umi_molecules_>_to_consider_as_true	description
Adcyap1r1	1	adenylate cyclase activating polypeptide 1 receptor 1 [Source:MGI Symbol;Acc:MGI:108449]
Agt	1	angiotensinogen (serpin peptidase inhibitor, clade A, member 8) [Source:MGI Symbol;Acc:MGI:87963]
Aldh1l1	1	aldehyde dehydrogenase 1 family, member L1 [Source:MGI Symbol;Acc:MGI:1340024]
Fgfr3	1	fibroblast growth factor receptor 3 [Source:MGI Symbol;Acc:MGI:95524]
Glul	1	glutamate-ammonia ligase (glutamine synthetase) [Source:MGI Symbol;Acc:MGI:95739]
Gli1	1	GLI-Kruppel family member GLI1 [Source:MGI Symbol;Acc:MGI:95727]
Lcat	1	lecithin cholesterol acyltransferase [Source:MGI Symbol;Acc:MGI:96755]
Lxn	1	latexin [Source:MGI Symbol;Acc:MGI:107633]
Aqp4	10	aquaporin 4 [Source:MGI Symbol;Acc:MGI:107387]
Gja1	10	gap junction protein, alpha 1 [Source:MGI Symbol;Acc:MGI:95713]
Gfap	10	glial fibrillary acidic protein [Source:MGI Symbol;Acc:MGI:95697]
Hacd2	10	3-hydroxyacyl-CoA dehydratase 2 [Source:MGI Symbol;Acc:MGI:1918007]
Hepacam	10	hepatocyte cell adhesion molecule [Source:MGI Symbol;Acc:MGI:1920177]
Htra1	10	HtrA serine peptidase 1 [Source:MGI Symbol;Acc:MGI:1929076]
Ndrg2	10	N-myc downstream regulated gene 2 [Source:MGI Symbol;Acc:MGI:1352498]
Ntsr2	10	neurotensin receptor 2 [Source:MGI Symbol;Acc:MGI:108018]
Ntrk2	10	neurotrophic tyrosine kinase, receptor, type 2 [Source:MGI Symbol;Acc:MGI:97384]
Pla2g7	10	phospholipase A2, group VII (platelet-activating factor acetylhydrolase, plasma) [Source:MGI Symbol;Acc:MGI:1351327]
Slc1a3	10	solute carrier family 1 (glial high affinity glutamate transporter), member 3 [Source:MGI Symbol;Acc:MGI:99917]
Slc6a11	10	solute carrier family 6 (neurotransmitter transporter, GABA), member 11 [Source:MGI Symbol;Acc:MGI:95630]
Slc1a2	100	solute carrier family 1 (glial high affinity glutamate transporter), member 2 [Source:MGI Symbol;Acc:MGI:101931]
Apoe	100	apolipoprotein E [Source:MGI Symbol;Acc:MGI:88057]

## Sheet: Exclusion_>=3_genes
marker_gene	min_n_umi_molecules_>_to_consider_as_true	description
Rbfox3	5	RNA binding protein, fox-1 homolog (C. elegans) 3 [Source:MGI Symbol;Acc:MGI:106368]
Dlx5	1	distal-less homeobox 5 [Source:MGI Symbol;Acc:MGI:101926]
Elavl4	5	ELAV like RNA binding protein 4 [Source:MGI Symbol;Acc:MGI:107427]
Stmn2	5	stathmin-like 2 [Source:MGI Symbol;Acc:MGI:98241]
Snap25	5	synaptosomal-associated protein 25 [Source:MGI Symbol;Acc:MGI:98331]
Th	1	tyrosine hydroxylase [Source:MGI Symbol;Acc:MGI:98735]
Slc17a6	5	solute carrier family 17 (sodium-dependent inorganic phosphate cotransporter), member 6 [Source:MGI Symbol;Acc:MGI:2156052]
Gad1	5	glutamate decarboxylase 1 [Source:MGI Symbol;Acc:MGI:95632]
Gad2	5	glutamic acid decarboxylase 2 [Source:MGI Symbol;Acc:MGI:95634]
Npy	5	neuropeptide Y [Source:MGI Symbol;Acc:MGI:97374]
Agrp	5	agouti related neuropeptide [Source:MGI Symbol;Acc:MGI:892013]
Crh	5	corticotropin releasing hormone [Source:MGI Symbol;Acc:MGI:88496]
Trh	5	thyrotropin releasing hormone [Source:MGI Symbol;Acc:MGI:98823]
Avp	10	arginine vasopressin [Source:MGI Symbol;Acc:MGI:88121]
Pomc	10	pro-opiomelanocortin-alpha [Source:MGI Symbol;Acc:MGI:97742]
Hcrt	10	hypocretin [Source:MGI Symbol;Acc:MGI:1202306]
Oxt	10	oxytocin [Source:MGI Symbol;Acc:MGI:97453]
Cxcl14	1	chemokine (C-X-C motif) ligand 14 [Source:MGI Symbol;Acc:MGI:1888514]
Cxcl1	1	chemokine (C-X-C motif) ligand 1 [Source:MGI Symbol;Acc:MGI:108068]
Cxcl2	1	chemokine (C-X-C motif) ligand 2 [Source:MGI Symbol;Acc:MGI:1340094]
Foxj1	1	forkhead box J1 [Source:MGI Symbol;Acc:MGI:1347474]
Vim	1	vimentin [Source:MGI Symbol;Acc:MGI:98932]
Nes	1	nestin [Source:MGI Symbol;Acc:MGI:101784]
Enkur	1	enkurin, TRPC channel interacting protein [Source:MGI Symbol;Acc:MGI:1918483]
Foxj1	1	forkhead box J1 [Source:MGI Symbol;Acc:MGI:1347474]
Kif6	1	kinesin family member 6 [Source:MGI Symbol;Acc:MGI:1098238]
Kif9	1	kinesin family member 9 [Source:MGI Symbol;Acc:MGI:1098237]
Hydin	1	HYDIN, axonemal central pair apparatus protein [Source:MGI Symbol;Acc:MGI:2389007]
Mog	1	myelin oligodendrocyte glycoprotein [Source:MGI Symbol;Acc:MGI:97435]
Plp1	1	proteolipid protein (myelin) 1 [Source:MGI Symbol;Acc:MGI:97623]
Cnp	1	2',3'-cyclic nucleotide 3' phosphodiesterase [Source:MGI Symbol;Acc:MGI:88437]
Mag	1	myelin-associated glycoprotein [Source:MGI Symbol;Acc:MGI:96912]
Opalin	1	oligodendrocytic myelin paranodal and inner loop protein [Source:MGI Symbol;Acc:MGI:2657025]
Sox10	1	SRY (sex determining region Y)-box 10 [Source:MGI Symbol;Acc:MGI:98358]
Olig1	5	oligodendrocyte transcription factor 1 [Source:MGI Symbol;Acc:MGI:1355334]
Olig2	5	oligodendrocyte transcription factor 2 [Source:MGI Symbol;Acc:MGI:1355331]
Aif1	1	allograft inflammatory factor 1 [Source:MGI Symbol;Acc:MGI:1343098]
Itgam	1	integrin alpha M [Source:MGI Symbol;Acc:MGI:96607]
Ptprc	1	protein tyrosine phosphatase, receptor type, C [Source:MGI Symbol;Acc:MGI:97810]
Fcrls	1	Fc receptor-like S, scavenger receptor [Source:MGI Symbol;Acc:MGI:1933397]
Pdgfra	5	platelet derived growth factor receptor, alpha polypeptide [Source:MGI Symbol;Acc:MGI:97530]
Pdgfrb	10	platelet derived growth factor receptor, beta polypeptide [Source:MGI Symbol;Acc:MGI:97531]
Gpr17	1	G protein-coupled receptor 17 [Source:MGI Symbol;Acc:MGI:3584514]
Ugt8a	1	UDP galactosyltransferase 8A [Source:MGI Symbol;Acc:MGI:109522]
Sema3c	1	sema domain, immunoglobulin domain (Ig), short basic domain, secreted, (semaphorin) 3C [Source:MGI Symbol;Acc:MGI:107557]
Sema4d	1	sema domain, immunoglobulin domain (Ig), transmembrane domain (TM) and short cytoplasmic domain, (semaphorin) 4D [Source:MGI Symbol;Acc:MGI:109244]
Sema4f	1	sema domain, immunoglobulin domain (Ig), TM domain, and short cytoplasmic domain [Source:MGI Symbol;Acc:MGI:1340055]
Gpr37	10	G protein-coupled receptor 37 [Source:MGI Symbol;Acc:MGI:1313297]
Cspg4	1	chondroitin sulfate proteoglycan 4 [Source:MGI Symbol;Acc:MGI:2153093]
Lingo1	10	leucine rich repeat and Ig domain containing 1 [Source:MGI Symbol;Acc:MGI:1915522]
Rgs5	10	regulator of G-protein signaling 5 [Source:MGI Symbol;Acc:MGI:1098434]
Des	1	desmin [Source:MGI Symbol;Acc:MGI:94885]
Acta2	1	actin alpha 2, smooth muscle, aorta [Source:MGI Symbol;Acc:MGI:87909]
Cd248	1	CD248 antigen, endosialin [Source:MGI Symbol;Acc:MGI:1917695]
Myh11	1	myosin, heavy polypeptide 11, smooth muscle [Source:MGI Symbol;Acc:MGI:102643]
Cdh5	10	cadherin 5 [Source:MGI Symbol;Acc:MGI:105057]
Fgf10	1	fibroblast growth factor 10 [Source:MGI Symbol;Acc:MGI:1099809]
Rax	1	retina and anterior neural fold homeobox [Source:MGI Symbol;Acc:MGI:109632]
Tbx3	1	T-box 3 [Source:MGI Symbol;Acc:MGI:98495]
