# Supplementary material for: Molecularly stratified hypothalamic astrocytes are cellular foci for obesity
Source: Research Square preprint supplement (doi:10.21203/rs.3.rs-3748581/v1), 2024-02-09
Supplement: Supplementary file 5 [file 72d03074c8529f1460ee5078.xlsx]

## Sheet: Differentially_Expressed_Genes
p_val	avg_log2FC	pct_1	pct_2	p_val_adj	cluster	gene	description
9.35e-17	16.4629	0.423	0.277	3.98e-14	1	Neat1	nuclear paraspeckle assembly transcript 1 (non-protein coding) [Source:MGI Symbol;Acc:MGI:1914211]
0	8.22421	0.956	0.426	0	1	Malat1	metastasis associated lung adenocarcinoma transcript 1 (non-coding RNA) [Source:MGI Symbol;Acc:MGI:1919539]
6.18e-30	7.98809	0.508	0.382	2.63e-27	1	Dclk1	doublecortin-like kinase 1 [Source:MGI Symbol;Acc:MGI:1330861]
1.88e-28	7.4696	0.309	0.301	8.03e-26	1	H13	histocompatibility 13 [Source:MGI Symbol;Acc:MGI:95886]
1.5e-20	5.51731	0.484	0.422	6.41e-18	1	Kif1b	kinesin family member 1B [Source:MGI Symbol;Acc:MGI:108426]
1.16e-86	3.83521	0.307	0.376	4.94e-84	1	B2m	beta-2 microglobulin [Source:MGI Symbol;Acc:MGI:88127]
7.93e-19	3.74305	0.337	0.305	3.38e-16	1	Mapt	microtubule-associated protein tau [Source:MGI Symbol;Acc:MGI:97180]
9.74e-66	3.54259	0.333	0.355	4.15e-63	1	Ppp1cb	protein phosphatase 1 catalytic subunit beta [Source:MGI Symbol;Acc:MGI:104871]
1.53e-21	3.44529	0.362	0.367	6.51e-19	1	Ppp2ca	protein phosphatase 2 (formerly 2A), catalytic subunit, alpha isoform [Source:MGI Symbol;Acc:MGI:1321159]
0.0124	3.16431	0.455	0.402	52787695	1	Pafah1b1	platelet-activating factor acetylhydrolase, isoform 1b, subunit 1 [Source:MGI Symbol;Acc:MGI:109520]
3.35e-272	2.6631	0.577	0.394	1.43e-269	1	Gria2	glutamate receptor, ionotropic, AMPA2 (alpha 2) [Source:MGI Symbol;Acc:MGI:95809]
0	2.22981	0.685	0.419	0	1	Son	Son DNA binding protein [Source:MGI Symbol;Acc:MGI:98353]
0	1.65513	0.629	0.389	0	1	Pnisr	PNN interacting serine/arginine-rich [Source:MGI Symbol;Acc:MGI:1913875]
3.4e-11	1.46677	0.421	0.296	1.45e-08	1	Akap9	A kinase (PRKA) anchor protein (yotiao) 9 [Source:MGI Symbol;Acc:MGI:2178217]
5.74e-74	1.36805	0.494	0.401	2.45e-71	1	Srrm2	serine/arginine repetitive matrix 2 [Source:MGI Symbol;Acc:MGI:1923206]
5.06e-18	1.28841	0.487	0.42	2.16e-15	1	Sat1	spermidine/spermine N1-acetyl transferase 1 [Source:MGI Symbol;Acc:MGI:98233]
2.92e-245	1.28136	0.615	0.438	1.25e-242	1	Zbtb20	zinc finger and BTB domain containing 20 [Source:MGI Symbol;Acc:MGI:1929213]
0	1.25726	0.709	0.44	0	1	Atp1a2	ATPase, Na+/K+ transporting, alpha 2 polypeptide [Source:MGI Symbol;Acc:MGI:88106]
1.08e-256	1.22368	0.607	0.424	4.62e-254	1	Macf1	microtubule-actin crosslinking factor 1 [Source:MGI Symbol;Acc:MGI:108559]
3.32e-33	1.18817	0.34	0.338	1.42e-30	1	Tgoln1	trans-golgi network protein [Source:MGI Symbol;Acc:MGI:105080]
3e-155	1.09244	0.567	0.434	1.28e-152	1	Ntm	neurotrimin [Source:MGI Symbol;Acc:MGI:2446259]
0.0014	1.07814	0.425	0.327	5956602	1	Srrm1	serine/arginine repetitive matrix 1 [Source:MGI Symbol;Acc:MGI:1858303]
6.85e-147	1.05752	0.553	0.413	2.92e-144	1	Ank2	ankyrin 2, brain [Source:MGI Symbol;Acc:MGI:88025]
4.03e-201	0.968981	0.581	0.418	1.72e-198	1	Snrnp70	small nuclear ribonucleoprotein 70 (U1) [Source:MGI Symbol;Acc:MGI:98341]
1.94e-26	0.944186	0.481	0.364	8.26e-24	1	Ktn1	kinectin 1 [Source:MGI Symbol;Acc:MGI:109153]
5.78e-95	0.868538	0.529	0.418	2.46e-92	1	Mat2a	methionine adenosyltransferase II, alpha [Source:MGI Symbol;Acc:MGI:2443731]
5.14e-212	0.861627	0.598	0.448	2.19e-209	1	Nrxn1	neurexin I [Source:MGI Symbol;Acc:MGI:1096391]
1.64e-91	0.844267	0.563	0.463	7e-89	1	Rsrp1	arginine/serine rich protein 1 [Source:MGI Symbol;Acc:MGI:106498]
5.15e-125	0.835321	0.542	0.404	2.19e-122	1	Ttc14	tetratricopeptide repeat domain 14 [Source:MGI Symbol;Acc:MGI:1914370]
1.29e-141	0.746626	0.556	0.431	5.51e-139	1	Ptprz1	protein tyrosine phosphatase, receptor type Z, polypeptide 1 [Source:MGI Symbol;Acc:MGI:97816]
3.91e-164	0.739557	0.563	0.427	1.66e-161	1	Acsl3	acyl-CoA synthetase long-chain family member 3 [Source:MGI Symbol;Acc:MGI:1921455]
4.77e-146	0.736979	0.571	0.44	2.03e-143	1	Ncam1	neural cell adhesion molecule 1 [Source:MGI Symbol;Acc:MGI:97281]
2.78e-107	0.72746	0.545	0.422	1.18e-104	1	Ogt	O-linked N-acetylglucosamine (GlcNAc) transferase (UDP-N-acetylglucosamine:polypeptide-N-acetylglucosaminyl transferase) [Source:MGI Symbol;Acc:MGI:1339639]
3.47e-305	0.708061	0.623	0.443	1.48e-302	1	Slc1a3	solute carrier family 1 (glial high affinity glutamate transporter), member 3 [Source:MGI Symbol;Acc:MGI:99917]
1.78e-55	0.697893	0.534	0.378	7.59e-53	1	Tnik	TRAF2 and NCK interacting kinase [Source:MGI Symbol;Acc:MGI:1916264]
5.69e-100	0.680738	0.547	0.438	2.42e-97	1	Rbm39	RNA binding motif protein 39 [Source:MGI Symbol;Acc:MGI:2157953]
1.67e-259	0.672417	0.622	0.455	7.11e-257	1	Plpp3	phospholipid phosphatase 3 [Source:MGI Symbol;Acc:MGI:1915166]
3.03e-46	0.669549	0.318	0.394	1.29e-43	1	Psmc5	protease (prosome, macropain) 26S subunit, ATPase 5 [Source:MGI Symbol;Acc:MGI:105047]
1.73e-05	0.666786	0.34	0.282	0.00736	1	Lpcat3	lysophosphatidylcholine acyltransferase 3 [Source:MGI Symbol;Acc:MGI:1315211]
2.14e-33	0.649422	0.514	0.38	9.12e-31	1	Rbm25	RNA binding motif protein 25 [Source:MGI Symbol;Acc:MGI:1914289]
2.41e-86	0.646018	0.525	0.413	1.03e-83	1	Hnrnpa2b1	heterogeneous nuclear ribonucleoprotein A2/B1 [Source:MGI Symbol;Acc:MGI:104819]
1.75e-184	0.625483	0.578	0.434	7.46e-182	1	Slc6a1	solute carrier family 6 (neurotransmitter transporter, GABA), member 1 [Source:MGI Symbol;Acc:MGI:95627]
1.11e-15	0.60143	0.365	0.349	4.74e-13	1	Eif2s2	eukaryotic translation initiation factor 2, subunit 2 (beta) [Source:MGI Symbol;Acc:MGI:1914454]
5.46e-48	0.571545	0.502	0.427	2.33e-45	1	Syt11	synaptotagmin XI [Source:MGI Symbol;Acc:MGI:1859547]
8.92e-110	0.565287	0.543	0.414	3.8e-107	1	Ddx5	DEAD box helicase 5 [Source:MGI Symbol;Acc:MGI:105037]
7.95e-23	0.549496	0.473	0.404	3.39e-20	1	Cadm1	cell adhesion molecule 1 [Source:MGI Symbol;Acc:MGI:1889272]
2.95e-69	0.53614	0.543	0.454	1.26e-66	1	Lsamp	limbic system-associated membrane protein [Source:MGI Symbol;Acc:MGI:1261760]
1.12e-69	0.525108	0.492	0.393	4.78e-67	1	Luc7l3	LUC7-like 3 (S. cerevisiae) [Source:MGI Symbol;Acc:MGI:1914934]
1.4e-10	0.52278	0.356	0.331	5.98e-08	1	Vcp	valosin containing protein [Source:MGI Symbol;Acc:MGI:99919]
1.78e-14	0.500899	0.286	0.267	7.59e-12	1	Psmd2	proteasome (prosome, macropain) 26S subunit, non-ATPase, 2 [Source:MGI Symbol;Acc:MGI:1096584]
0.0221	0.478221	0.458	0.444	94314874	1	Mt2	metallothionein 2 [Source:MGI Symbol;Acc:MGI:97172]
1.31e-07	0.455007	0.454	0.38	5.6e-05	1	Atxn7l3b	ataxin 7-like 3B [Source:MGI Symbol;Acc:MGI:1914971]
4.15e-32	0.442814	0.491	0.423	1.77e-29	1	Srsf5	serine and arginine-rich splicing factor 5 [Source:MGI Symbol;Acc:MGI:98287]
5.14e-98	0.423059	0.278	0.386	2.19e-95	1	Rps26	ribosomal protein S26 [Source:MGI Symbol;Acc:MGI:1351628]
0.0045	0.41465	0.449	0.401	19175871	1	Csnk1a1	casein kinase 1, alpha 1 [Source:MGI Symbol;Acc:MGI:1934950]
1.33e-120	0.401533	0.547	0.433	5.67e-118	1	Slc4a4	solute carrier family 4 (anion exchanger), member 4 [Source:MGI Symbol;Acc:MGI:1927555]
8.65e-47	0.348304	0.498	0.422	3.68e-44	1	Slc7a10	solute carrier family 7 (cationic amino acid transporter, y+ system), member 10 [Source:MGI Symbol;Acc:MGI:1858261]
3.78e-07	0.342535	0.401	0.379	0.000161	1	Ncl	nucleolin [Source:MGI Symbol;Acc:MGI:97286]
1.29e-07	0.311781	0.424	0.394	5.49e-05	1	Calr	calreticulin [Source:MGI Symbol;Acc:MGI:88252]
8.1e-25	0.309849	0.378	0.378	3.45e-22	1	Rnf13	ring finger protein 13 [Source:MGI Symbol;Acc:MGI:1346341]
1.77e-16	0.308121	0.383	0.344	7.54e-14	1	Syn2	synapsin II [Source:MGI Symbol;Acc:MGI:103020]
4.86e-57	0.296705	0.523	0.448	2.07e-54	1	Gja1	gap junction protein, alpha 1 [Source:MGI Symbol;Acc:MGI:95713]
1.29e-34	0.290169	0.347	0.349	5.49e-32	1	Ergic3	ERGIC and golgi 3 [Source:MGI Symbol;Acc:MGI:1913616]
1.6e-74	0.273973	0.27	0.298	6.83e-72	1	Tusc3	tumor suppressor candidate 3 [Source:MGI Symbol;Acc:MGI:1933134]
0.00158	0.26671	0.47	0.379	6738068	1	Srpk2	serine/arginine-rich protein specific kinase 2 [Source:MGI Symbol;Acc:MGI:1201408]
9.09e-243	2.68931	0.569	0.42	3.87e-240	2	Tsc22d3	TSC22 domain family, member 3 [Source:MGI Symbol;Acc:MGI:1196284]
1.02e-111	2.26602	0.514	0.381	4.35e-109	2	Cox5a	cytochrome c oxidase subunit 5A [Source:MGI Symbol;Acc:MGI:88474]
0	1.75207	0.704	0.42	0	2	Mt1	metallothionein 1 [Source:MGI Symbol;Acc:MGI:97171]
0	1.48992	0.605	0.416	0	2	Mt2	metallothionein 2 [Source:MGI Symbol;Acc:MGI:97172]
4.9e-08	1.27669	0.421	0.336	2.09e-05	2	Snrpd1	small nuclear ribonucleoprotein D1 [Source:MGI Symbol;Acc:MGI:98344]
0	1.17092	0.675	0.441	0	2	Ckb	creatine kinase, brain [Source:MGI Symbol;Acc:MGI:88407]
1.44e-175	1.12162	0.551	0.404	6.14e-173	2	Slc25a5	solute carrier family 25 (mitochondrial carrier, adenine nucleotide translocator), member 5 [Source:MGI Symbol;Acc:MGI:1353496]
1695819	1.09782	0.369	0.337	722419105	2	Cotl1	coactosin-like 1 (Dictyostelium) [Source:MGI Symbol;Acc:MGI:1919292]
9.09e-24	1.02248	0.394	0.413	3.87e-21	2	Pafah1b1	platelet-activating factor acetylhydrolase, isoform 1b, subunit 1 [Source:MGI Symbol;Acc:MGI:109520]
0	0.996422	0.634	0.415	0	2	Aldoc	aldolase C, fructose-bisphosphate [Source:MGI Symbol;Acc:MGI:101863]
1.65e-34	0.96618	0.521	0.457	7.01e-32	2	Tsc22d4	NA
9.25e-304	0.952052	0.604	0.407	3.94e-301	2	Ldhb	lactate dehydrogenase B [Source:MGI Symbol;Acc:MGI:96763]
5.6e-76	0.904449	0.469	0.349	2.39e-73	2	Ndufa12	NADH:ubiquinone oxidoreductase subunit A12 [Source:MGI Symbol;Acc:MGI:1913664]
1.29e-115	0.823128	0.55	0.42	5.49e-113	2	Dynll1	dynein light chain LC8-type 1 [Source:MGI Symbol;Acc:MGI:1861457]
0	0.779209	0.62	0.427	0	2	Prdx6	peroxiredoxin 6 [Source:MGI Symbol;Acc:MGI:894320]
2.01e-56	0.766209	0.51	0.393	8.58e-54	2	Uqcrfs1	ubiquinol-cytochrome c reductase, Rieske iron-sulfur polypeptide 1 [Source:MGI Symbol;Acc:MGI:1913944]
2.54e-164	0.751568	0.534	0.375	1.08e-161	2	Prdx1	peroxiredoxin 1 [Source:MGI Symbol;Acc:MGI:99523]
7.72e-33	0.744901	0.496	0.401	3.29e-30	2	Cyc1	cytochrome c-1 [Source:MGI Symbol;Acc:MGI:1913695]
1.48e-46	0.732631	0.481	0.391	6.32e-44	2	Tubb2a	tubulin, beta 2A class IIA [Source:MGI Symbol;Acc:MGI:107861]
1.42e-256	0.727406	0.585	0.416	6.04e-254	2	Cd81	CD81 antigen [Source:MGI Symbol;Acc:MGI:1096398]
6.49e-24	0.722559	0.446	0.384	2.76e-21	2	Ndufa11	NADH:ubiquinone oxidoreductase subunit A11 [Source:MGI Symbol;Acc:MGI:1917125]
6.28e-72	0.671107	0.521	0.416	2.68e-69	2	Gstm5	glutathione S-transferase, mu 5 [Source:MGI Symbol;Acc:MGI:1309466]
8.83e-71	0.642261	0.515	0.41	3.76e-68	2	Uqcrb	ubiquinol-cytochrome c reductase binding protein [Source:MGI Symbol;Acc:MGI:1914780]
7.8e-60	0.622794	0.504	0.401	3.32e-57	2	Cox5b	cytochrome c oxidase subunit 5B [Source:MGI Symbol;Acc:MGI:88475]
2.57e-05	0.620762	0.428	0.4	0.0109	2	Tmed10	transmembrane p24 trafficking protein 10 [Source:MGI Symbol;Acc:MGI:1915831]
2.18e-34	0.619927	0.494	0.432	9.27e-32	2	Eno1	enolase 1, alpha non-neuron [Source:MGI Symbol;Acc:MGI:95393]
8.59e-115	0.606925	0.545	0.425	3.66e-112	2	Slc25a4	solute carrier family 25 (mitochondrial carrier, adenine nucleotide translocator), member 4 [Source:MGI Symbol;Acc:MGI:1353495]
1112991	0.592037	0.426	0.361	474134143	2	Ndufs2	NADH:ubiquinone oxidoreductase core subunit S2 [Source:MGI Symbol;Acc:MGI:2385112]
3.72e-94	0.586496	0.526	0.408	1.59e-91	2	Aldoa	aldolase A, fructose-bisphosphate [Source:MGI Symbol;Acc:MGI:87994]
7.84e-209	0.572354	0.603	0.445	3.34e-206	2	Eif1	eukaryotic translation initiation factor 1 [Source:MGI Symbol;Acc:MGI:105125]
5.12e-40	0.557451	0.482	0.404	2.18e-37	2	Slc25a3	solute carrier family 25 (mitochondrial carrier, phosphate carrier), member 3 [Source:MGI Symbol;Acc:MGI:1353498]
2.53e-15	0.551586	0.284	0.309	1.08e-12	2	Flywch1	FLYWCH-type zinc finger 1 [Source:MGI Symbol;Acc:MGI:2442638]
1.9e-67	0.545098	0.515	0.402	8.09e-65	2	Uqcr10	ubiquinol-cytochrome c reductase, complex III subunit X [Source:MGI Symbol;Acc:MGI:1913402]
3.57e-92	0.538257	0.54	0.428	1.52e-89	2	Chchd10	coiled-coil-helix-coiled-coil-helix domain containing 10 [Source:MGI Symbol;Acc:MGI:2143558]
8647118	0.532363	0.44	0.378	1	2	Vdac3	voltage-dependent anion channel 3 [Source:MGI Symbol;Acc:MGI:106922]
0.0505	0.520913	0.449	0.405	215092229	2	Tsc22d1	TSC22 domain family, member 1 [Source:MGI Symbol;Acc:MGI:109127]
1.06e-42	0.517008	0.48	0.379	4.54e-40	2	Tmem176a	transmembrane protein 176A [Source:MGI Symbol;Acc:MGI:1913308]
1.38e-31	0.51666	0.466	0.388	5.9e-29	2	Prdx2	peroxiredoxin 2 [Source:MGI Symbol;Acc:MGI:109486]
1.02e-54	0.515332	0.521	0.446	4.34e-52	2	Pla2g7	phospholipase A2, group VII (platelet-activating factor acetylhydrolase, plasma) [Source:MGI Symbol;Acc:MGI:1351327]
0.00729	0.509835	0.361	0.35	3103935	2	Psma1	proteasome subunit alpha 1 [Source:MGI Symbol;Acc:MGI:1347005]
0.0103	0.506713	0.359	0.331	43673146	2	Crip2	cysteine rich protein 2 [Source:MGI Symbol;Acc:MGI:1915587]
1.21e-74	0.506573	0.517	0.411	5.16e-72	2	Atp5h	ATP synthase, H+ transporting, mitochondrial F0 complex, subunit D [Source:MGI Symbol;Acc:MGI:1918929]
3.61e-24	0.498833	0.504	0.442	1.54e-21	2	Ubc	ubiquitin C [Source:MGI Symbol;Acc:MGI:98889]
6.46e-70	0.494682	0.487	0.387	2.75e-67	2	Atp5c1	ATP synthase, H+ transporting, mitochondrial F1 complex, gamma polypeptide 1 [Source:MGI Symbol;Acc:MGI:1261437]
5.19e-32	0.494565	0.493	0.422	2.21e-29	2	Mdh1	malate dehydrogenase 1, NAD (soluble) [Source:MGI Symbol;Acc:MGI:97051]
5.93e-06	0.493033	0.441	0.368	0.00253	2	Sar1b	secretion associated Ras related GTPase 1B [Source:MGI Symbol;Acc:MGI:1913647]
3.7e-42	0.488622	0.454	0.355	1.57e-39	2	Tmem176b	transmembrane protein 176B [Source:MGI Symbol;Acc:MGI:1916348]
1.03e-38	0.475487	0.505	0.408	4.4e-36	2	Ndufa8	NADH:ubiquinone oxidoreductase subunit A8 [Source:MGI Symbol;Acc:MGI:1915625]
1.29e-34	0.473921	0.504	0.427	5.5e-32	2	Atp5b	ATP synthase, H+ transporting mitochondrial F1 complex, beta subunit [Source:MGI Symbol;Acc:MGI:107801]
1.58e-23	0.465725	0.462	0.366	6.72e-21	2	Psma2	proteasome subunit alpha 2 [Source:MGI Symbol;Acc:MGI:104885]
2.16e-39	0.436419	0.463	0.38	9.22e-37	2	Ndufs7	NADH:ubiquinone oxidoreductase core subunit S7 [Source:MGI Symbol;Acc:MGI:1922656]
7.83e-68	0.432165	0.526	0.419	3.33e-65	2	Ndufa4	Ndufa4, mitochondrial complex associated [Source:MGI Symbol;Acc:MGI:107686]
1.78e-45	0.418143	0.461	0.367	7.56e-43	2	Ndufab1	NADH:ubiquinone oxidoreductase subunit AB1 [Source:MGI Symbol;Acc:MGI:1917566]
3.75e-98	0.414717	0.542	0.447	1.6e-95	2	Gpr37l1	G protein-coupled receptor 37-like 1 [Source:MGI Symbol;Acc:MGI:1928503]
1.21e-56	0.408258	0.468	0.368	5.15e-54	2	Suclg1	succinate-CoA ligase, GDP-forming, alpha subunit [Source:MGI Symbol;Acc:MGI:1927234]
1.18e-24	0.384744	0.493	0.42	5.04e-22	2	Atp5j2	ATP synthase, H+ transporting, mitochondrial F0 complex, subunit F2 [Source:MGI Symbol;Acc:MGI:1927558]
3.83e-29	0.38014	0.302	0.329	1.63e-26	2	Hmgcs1	3-hydroxy-3-methylglutaryl-Coenzyme A synthase 1 [Source:MGI Symbol;Acc:MGI:107592]
1.62e-57	0.372159	0.468	0.339	6.91e-55	2	Ndufv2	NADH:ubiquinone oxidoreductase core subunit V2 [Source:MGI Symbol;Acc:MGI:1920150]
8.43e-52	0.365251	0.486	0.388	3.59e-49	2	Ndufc2	NADH:ubiquinone oxidoreductase subunit C2 [Source:MGI Symbol;Acc:MGI:1344370]
2.25e-70	0.358032	0.522	0.411	9.57e-68	2	Cox6b1	cytochrome c oxidase, subunit 6B1 [Source:MGI Symbol;Acc:MGI:107460]
1.29e-33	0.353299	0.491	0.419	5.47e-31	2	Acsbg1	acyl-CoA synthetase bubblegum family member 1 [Source:MGI Symbol;Acc:MGI:2385656]
4.79e-09	0.351253	0.427	0.343	2.04e-06	2	Psma7	proteasome subunit alpha 7 [Source:MGI Symbol;Acc:MGI:1347070]
1.11e-26	0.343034	0.478	0.41	4.73e-24	2	Tecr	trans-2,3-enoyl-CoA reductase [Source:MGI Symbol;Acc:MGI:1915408]
0.0102	0.340517	0.438	0.382	43289915	2	Rhoa	ras homolog family member A [Source:MGI Symbol;Acc:MGI:1096342]
8.47e-62	0.338256	0.474	0.364	3.61e-59	2	Ndufb8	NADH:ubiquinone oxidoreductase subunit B8 [Source:MGI Symbol;Acc:MGI:1914514]
2.15e-11	0.335043	0.459	0.386	9.17e-09	2	Spcs1	signal peptidase complex subunit 1 homolog (S. cerevisiae) [Source:MGI Symbol;Acc:MGI:1916269]
7.32e-105	0.32854	0.523	0.396	3.12e-102	2	Ubb	ubiquitin B [Source:MGI Symbol;Acc:MGI:98888]
1.54e-26	0.322462	0.499	0.42	6.56e-24	2	Hint1	histidine triad nucleotide binding protein 1 [Source:MGI Symbol;Acc:MGI:1321133]
2.85e-25	0.320562	0.495	0.442	1.21e-22	2	Ntsr2	neurotensin receptor 2 [Source:MGI Symbol;Acc:MGI:108018]
3567511	0.31731	0.321	0.297	1	2	Tmem50a	transmembrane protein 50A [Source:MGI Symbol;Acc:MGI:1919067]
2.92e-45	0.315942	0.52	0.45	1.24e-42	2	Atp6v0b	ATPase, H+ transporting, lysosomal V0 subunit B [Source:MGI Symbol;Acc:MGI:1890510]
2.03e-11	0.30636	0.46	0.39	8.64e-09	2	Sdf2	stromal cell derived factor 2 [Source:MGI Symbol;Acc:MGI:108019]
7.86e-08	0.305388	0.47	0.407	3.35e-05	2	Prdx5	peroxiredoxin 5 [Source:MGI Symbol;Acc:MGI:1859821]
169845	0.304335	0.443	0.386	723539794	2	Spcs2	signal peptidase complex subunit 2 homolog (S. cerevisiae) [Source:MGI Symbol;Acc:MGI:1913874]
1.37e-09	0.298809	0.447	0.411	5.85e-07	2	Slc3a2	solute carrier family 3 (activators of dibasic and neutral amino acid transport), member 2 [Source:MGI Symbol;Acc:MGI:96955]
3.47e-25	0.298742	0.499	0.427	1.48e-22	2	Oaz1	ornithine decarboxylase antizyme 1 [Source:MGI Symbol;Acc:MGI:109433]
5579515	0.295693	0.405	0.334	1	2	Dpm3	dolichyl-phosphate mannosyltransferase polypeptide 3 [Source:MGI Symbol;Acc:MGI:1915813]
1962907	0.294572	0.368	0.346	836198396	2	Fkbp8	FK506 binding protein 8 [Source:MGI Symbol;Acc:MGI:1341070]
3.57e-11	0.290149	0.459	0.362	1.52e-08	2	Ndufv3	NADH:ubiquinone oxidoreductase core subunit V3 [Source:MGI Symbol;Acc:MGI:1890894]
1.79e-12	0.28764	0.446	0.391	7.64e-10	2	Dad1	defender against cell death 1 [Source:MGI Symbol;Acc:MGI:101912]
6.22e-10	0.282313	0.449	0.398	2.65e-07	2	Atp5g3	ATP synthase, H+ transporting, mitochondrial F0 complex, subunit C3 (subunit 9) [Source:MGI Symbol;Acc:MGI:2442035]
5.82e-14	0.275174	0.304	0.304	2.48e-11	2	Pcmt1	protein-L-isoaspartate (D-aspartate) O-methyltransferase 1 [Source:MGI Symbol;Acc:MGI:97502]
1.08e-16	0.263141	0.439	0.382	4.62e-14	2	Mif	macrophage migration inhibitory factor (glycosylation-inhibiting factor) [Source:MGI Symbol;Acc:MGI:96982]
3.11e-10	0.261476	0.426	0.382	1.32e-07	2	Ubl5	ubiquitin-like 5 [Source:MGI Symbol;Acc:MGI:1913427]
4.3e-12	0.260572	0.487	0.442	1.83e-09	2	H3f3b	H3.3 histone B [Source:MGI Symbol;Acc:MGI:1101768]
4.43e-17	0.260511	0.438	0.376	1.89e-14	2	Ndufb5	NADH:ubiquinone oxidoreductase subunit B5 [Source:MGI Symbol;Acc:MGI:1913296]
5.83e-07	0.25678	0.44	0.399	0.000248	2	Rabac1	Rab acceptor 1 (prenylated) [Source:MGI Symbol;Acc:MGI:1201692]
1.14e-72	0.25535	0.513	0.399	4.87e-70	2	Gstm1	glutathione S-transferase, mu 1 [Source:MGI Symbol;Acc:MGI:95860]
0.00187	0.250701	0.447	0.414	7976329	2	Hnrnpk	heterogeneous nuclear ribonucleoprotein K [Source:MGI Symbol;Acc:MGI:99894]
1.19e-34	2.68803	0.484	0.423	5.07e-32	3	S100a16	S100 calcium binding protein A16 [Source:MGI Symbol;Acc:MGI:1915110]
1.28e-25	0.323182	0.417	0.384	5.45e-23	3	Lrpap1	low density lipoprotein receptor-related protein associated protein 1 [Source:MGI Symbol;Acc:MGI:96829]
1.01e-24	5.05089	0.377	0.378	4.31e-22	3	Tprgl	transformation related protein 63 regulated like [Source:MGI Symbol;Acc:MGI:1915058]
4.07e-21	0.771344	0.409	0.391	1.74e-18	3	Nptn	neuroplastin [Source:MGI Symbol;Acc:MGI:108077]
6.15e-21	0.607424	0.316	0.326	2.62e-18	3	Capns1	calpain, small subunit 1 [Source:MGI Symbol;Acc:MGI:88266]
2.3e-11	0.386647	0.402	0.404	9.79e-09	3	Ndufc2	NADH:ubiquinone oxidoreductase subunit C2 [Source:MGI Symbol;Acc:MGI:1344370]
0.000224	3.12892	0.382	0.402	0.0955	3	Lsm6	LSM6 homolog, U6 small nuclear RNA and mRNA degradation associated [Source:MGI Symbol;Acc:MGI:1925901]
0	15.8626	0.835	0.326	0	4	Nnat	neuronatin [Source:MGI Symbol;Acc:MGI:104716]
0	7.99329	0.691	0.35	0	4	Slc1a2	solute carrier family 1 (glial high affinity glutamate transporter), member 2 [Source:MGI Symbol;Acc:MGI:101931]
0	3.68917	0.761	0.337	0	4	Scd2	stearoyl-Coenzyme A desaturase 2 [Source:MGI Symbol;Acc:MGI:98240]
6.19e-45	3.63805	0.484	0.406	2.64e-42	4	Ptn	pleiotrophin [Source:MGI Symbol;Acc:MGI:97804]
0	3.41331	0.734	0.41	0	4	Sparc	secreted acidic cysteine rich glycoprotein [Source:MGI Symbol;Acc:MGI:98373]
0	2.63648	0.731	0.388	0	4	Clu	clusterin [Source:MGI Symbol;Acc:MGI:88423]
0	2.21861	0.721	0.382	0	4	Dbi	diazepam binding inhibitor [Source:MGI Symbol;Acc:MGI:94865]
2.51e-29	2.1711	0.493	0.43	1.07e-26	4	Itih3	inter-alpha trypsin inhibitor, heavy chain 3 [Source:MGI Symbol;Acc:MGI:96620]
0	2.05337	0.681	0.4	0	4	Tmem47	transmembrane protein 47 [Source:MGI Symbol;Acc:MGI:2177570]
2.14e-32	1.98558	0.465	0.376	9.13e-30	4	Atp5e	ATP synthase, H+ transporting, mitochondrial F1 complex, epsilon subunit [Source:MGI Symbol;Acc:MGI:1855697]
0	1.97661	0.708	0.355	0	4	Mlc1	megalencephalic leukoencephalopathy with subcortical cysts 1 homolog (human) [Source:MGI Symbol;Acc:MGI:2157910]
1.31e-160	1.60716	0.591	0.452	5.6e-158	4	Slc1a3	solute carrier family 1 (glial high affinity glutamate transporter), member 3 [Source:MGI Symbol;Acc:MGI:99917]
6.87e-232	1.43654	0.593	0.429	2.92e-229	4	Slc4a4	solute carrier family 4 (anion exchanger), member 4 [Source:MGI Symbol;Acc:MGI:1927555]
5.39e-15	1.42905	0.451	0.409	2.3e-12	4	Fut9	fucosyltransferase 9 [Source:MGI Symbol;Acc:MGI:1330859]
2.03e-245	1.4085	0.596	0.389	8.65e-243	4	Scg3	secretogranin III [Source:MGI Symbol;Acc:MGI:103032]
9.25e-255	1.40201	0.617	0.426	3.94e-252	4	Cst3	cystatin C [Source:MGI Symbol;Acc:MGI:102519]
2.75e-225	1.40056	0.593	0.423	1.17e-222	4	Slc6a11	solute carrier family 6 (neurotransmitter transporter, GABA), member 11 [Source:MGI Symbol;Acc:MGI:95630]
0	1.30597	0.685	0.414	0	4	Ntrk2	neurotrophic tyrosine kinase, receptor, type 2 [Source:MGI Symbol;Acc:MGI:97384]
0	1.28785	0.621	0.386	0	4	Gstm1	glutathione S-transferase, mu 1 [Source:MGI Symbol;Acc:MGI:95860]
0	1.26203	0.674	0.416	0	4	Aldoc	aldolase C, fructose-bisphosphate [Source:MGI Symbol;Acc:MGI:101863]
0	1.20429	0.725	0.447	0	4	Sparcl1	SPARC-like 1 [Source:MGI Symbol;Acc:MGI:108110]
5.59e-197	1.07504	0.585	0.388	2.38e-194	4	Tmbim6	transmembrane BAX inhibitor motif containing 6 [Source:MGI Symbol;Acc:MGI:99682]
0	1.04412	0.603	0.387	0	4	Gpm6a	glycoprotein m6a [Source:MGI Symbol;Acc:MGI:107671]
1.26e-57	1.00023	0.527	0.443	5.35e-55	4	Glul	glutamate-ammonia ligase (glutamine synthetase) [Source:MGI Symbol;Acc:MGI:95739]
1.08e-35	0.973263	0.47	0.315	4.6e-33	4	Crip2	cysteine rich protein 2 [Source:MGI Symbol;Acc:MGI:1915587]
2.76e-270	0.96869	0.604	0.398	1.18e-267	4	Itm2b	integral membrane protein 2B [Source:MGI Symbol;Acc:MGI:1309517]
8.27e-90	0.967019	0.505	0.347	3.52e-87	4	Cd9	CD9 antigen [Source:MGI Symbol;Acc:MGI:88348]
7.54e-246	0.963038	0.618	0.414	3.21e-243	4	Rcn2	reticulocalbin 2 [Source:MGI Symbol;Acc:MGI:1349765]
6.16e-213	0.961868	0.603	0.415	2.62e-210	4	Tspan3	tetraspanin 3 [Source:MGI Symbol;Acc:MGI:1928098]
0	0.945723	0.658	0.421	0	4	Lamp1	lysosomal-associated membrane protein 1 [Source:MGI Symbol;Acc:MGI:96745]
3.06e-42	0.940361	0.304	0.345	1.3e-39	4	Nudcd3	NudC domain containing 3 [Source:MGI Symbol;Acc:MGI:2144158]
1.13e-137	0.907922	0.556	0.384	4.83e-135	4	Pygb	brain glycogen phosphorylase [Source:MGI Symbol;Acc:MGI:97828]
1.31e-78	0.885638	0.515	0.364	5.58e-76	4	Rpn2	ribophorin II [Source:MGI Symbol;Acc:MGI:98085]
0	0.862317	0.625	0.401	0	4	Mt3	metallothionein 3 [Source:MGI Symbol;Acc:MGI:97173]
0	0.772172	0.646	0.434	0	4	Ndrg2	N-myc downstream regulated gene 2 [Source:MGI Symbol;Acc:MGI:1352498]
9.01e-185	0.761592	0.575	0.4	3.84e-182	4	2310022B05Rik	RIKEN cDNA 2310022B05 gene [Source:MGI Symbol;Acc:MGI:1916801]
9.5e-60	0.759775	0.526	0.45	4.05e-57	4	Gja1	gap junction protein, alpha 1 [Source:MGI Symbol;Acc:MGI:95713]
1.44e-41	0.695201	0.475	0.368	6.12e-39	4	Reep5	receptor accessory protein 5 [Source:MGI Symbol;Acc:MGI:1270152]
4.91e-10	0.694934	0.405	0.321	2.09e-07	4	Tmem30a	transmembrane protein 30A [Source:MGI Symbol;Acc:MGI:106402]
2.48e-84	0.686564	0.529	0.384	1.06e-81	4	Cnp	2',3'-cyclic nucleotide 3' phosphodiesterase [Source:MGI Symbol;Acc:MGI:88437]
3.37e-119	0.681417	0.553	0.412	1.43e-116	4	Acsbg1	acyl-CoA synthetase bubblegum family member 1 [Source:MGI Symbol;Acc:MGI:2385656]
1.58e-150	0.67482	0.552	0.391	6.72e-148	4	Glud1	glutamate dehydrogenase 1 [Source:MGI Symbol;Acc:MGI:95753]
3.07e-55	0.665697	0.531	0.453	1.31e-52	4	Agt	angiotensinogen (serpin peptidase inhibitor, clade A, member 8) [Source:MGI Symbol;Acc:MGI:87963]
1.57e-133	0.663598	0.54	0.373	6.69e-131	4	Canx	calnexin [Source:MGI Symbol;Acc:MGI:88261]
2.66e-90	0.653714	0.524	0.395	1.13e-87	4	Rtn3	reticulon 3 [Source:MGI Symbol;Acc:MGI:1339970]
2.03e-42	0.644143	0.511	0.399	8.64e-40	4	Metrn	meteorin, glial cell differentiation regulator [Source:MGI Symbol;Acc:MGI:1917333]
4.95e-23	0.622871	0.484	0.402	2.11e-20	4	Ftl1	ferritin light polypeptide 1 [Source:MGI Symbol;Acc:MGI:95589]
5.09e-48	0.616523	0.51	0.39	2.17e-45	4	Marcks	myristoylated alanine rich protein kinase C substrate [Source:MGI Symbol;Acc:MGI:96907]
2.76e-12	0.613613	0.479	0.452	1.18e-09	4	Slc6a1	solute carrier family 6 (neurotransmitter transporter, GABA), member 1 [Source:MGI Symbol;Acc:MGI:95627]
8.41e-183	0.595096	0.602	0.438	3.58e-180	4	Ttyh1	tweety family member 1 [Source:MGI Symbol;Acc:MGI:1889007]
9.64e-63	0.591024	0.502	0.389	4.11e-60	4	Ctsb	cathepsin B [Source:MGI Symbol;Acc:MGI:88561]
0.00117	0.587411	0.413	0.331	4981301	4	Arhgdia	Rho GDP dissociation inhibitor (GDI) alpha [Source:MGI Symbol;Acc:MGI:2178103]
7.9e-95	0.586697	0.536	0.4	3.37e-92	4	Npc2	NPC intracellular cholesterol transporter 2 [Source:MGI Symbol;Acc:MGI:1915213]
6.22e-33	0.585821	0.453	0.306	2.65e-30	4	Hmgcs1	3-hydroxy-3-methylglutaryl-Coenzyme A synthase 1 [Source:MGI Symbol;Acc:MGI:107592]
2.92e-75	0.578319	0.54	0.425	1.24e-72	4	Laptm4a	lysosomal-associated protein transmembrane 4A [Source:MGI Symbol;Acc:MGI:108017]
1.84e-147	0.574435	0.571	0.418	7.84e-145	4	Itm2c	integral membrane protein 2C [Source:MGI Symbol;Acc:MGI:1927594]
0.000213	0.54733	0.427	0.379	0.0906	4	Ptov1	prostate tumor over expressed gene 1 [Source:MGI Symbol;Acc:MGI:1933946]
6.42e-09	0.545164	0.443	0.372	2.73e-06	4	Eef2	eukaryotic translation elongation factor 2 [Source:MGI Symbol;Acc:MGI:95288]
1.08e-65	0.51182	0.516	0.366	4.59e-63	4	Pea15a	proliferation and apoptosis adaptor protein 15A [Source:MGI Symbol;Acc:MGI:104799]
2.16e-49	0.509169	0.532	0.446	9.19e-47	4	Prdx6	peroxiredoxin 6 [Source:MGI Symbol;Acc:MGI:894320]
1.06e-17	0.491732	0.486	0.417	4.52e-15	4	Cspg5	chondroitin sulfate proteoglycan 5 [Source:MGI Symbol;Acc:MGI:1352747]
1.99e-07	0.481736	0.48	0.432	8.48e-05	4	Syt11	synaptotagmin XI [Source:MGI Symbol;Acc:MGI:1859547]
5.59e-30	0.478929	0.501	0.42	2.38e-27	4	Lamp2	lysosomal-associated membrane protein 2 [Source:MGI Symbol;Acc:MGI:96748]
8.61e-103	0.472599	0.547	0.436	3.67e-100	4	Ntsr2	neurotensin receptor 2 [Source:MGI Symbol;Acc:MGI:108018]
3.67e-100	0.472001	0.577	0.448	1.56e-97	4	Mt1	metallothionein 1 [Source:MGI Symbol;Acc:MGI:97171]
0.0604	0.454247	0.457	0.447	257108199	4	Acsl3	acyl-CoA synthetase long-chain family member 3 [Source:MGI Symbol;Acc:MGI:1921455]
9e-85	0.454237	0.536	0.429	3.84e-82	4	Cd81	CD81 antigen [Source:MGI Symbol;Acc:MGI:1096398]
1.52e-36	0.437407	0.49	0.387	6.47e-34	4	Prdx1	peroxiredoxin 1 [Source:MGI Symbol;Acc:MGI:99523]
0.000122	0.428586	0.435	0.461	0.0522	4	Pla2g7	phospholipase A2, group VII (platelet-activating factor acetylhydrolase, plasma) [Source:MGI Symbol;Acc:MGI:1351327]
6.18e-79	0.412904	0.566	0.448	2.63e-76	4	Ywhae	tyrosine 3-monooxygenase/tryptophan 5-monooxygenase activation protein, epsilon polypeptide [Source:MGI Symbol;Acc:MGI:894689]
2.07e-31	0.399161	0.465	0.37	8.8e-29	4	Aplp2	amyloid beta (A4) precursor-like protein 2 [Source:MGI Symbol;Acc:MGI:88047]
1.14e-48	0.398885	0.492	0.367	4.87e-46	4	Tmed7	transmembrane p24 trafficking protein 7 [Source:MGI Symbol;Acc:MGI:1913926]
3.34e-18	0.396566	0.51	0.444	1.42e-15	4	mt-Nd4	mitochondrially encoded NADH dehydrogenase 4 [Source:MGI Symbol;Acc:MGI:102498]
5.2e-36	0.390045	0.519	0.439	2.22e-33	4	Hspa8	heat shock protein 8 [Source:MGI Symbol;Acc:MGI:105384]
3.46e-33	0.382805	0.458	0.337	1.47e-30	4	Ptpra	protein tyrosine phosphatase, receptor type, A [Source:MGI Symbol;Acc:MGI:97808]
2.57e-12	0.372814	0.462	0.394	1.1e-09	4	Abr	active BCR-related gene [Source:MGI Symbol;Acc:MGI:107771]
8.85e-10	0.371297	0.48	0.421	3.77e-07	4	Mlf2	myeloid leukemia factor 2 [Source:MGI Symbol;Acc:MGI:1353554]
6.19e-10	0.356248	0.451	0.399	2.64e-07	4	Rabac1	Rab acceptor 1 (prenylated) [Source:MGI Symbol;Acc:MGI:1201692]
1.33e-27	0.355353	0.481	0.408	5.68e-25	4	mt-Nd1	mitochondrially encoded NADH dehydrogenase 1 [Source:MGI Symbol;Acc:MGI:101787]
4.75e-48	0.354754	0.507	0.405	2.02e-45	4	Arl6ip1	ADP-ribosylation factor-like 6 interacting protein 1 [Source:MGI Symbol;Acc:MGI:1858943]
9.97e-16	0.330091	0.432	0.36	4.25e-13	4	Hsp90b1	heat shock protein 90, beta (Grp94), member 1 [Source:MGI Symbol;Acc:MGI:98817]
2236881	0.324654	0.405	0.401	952911119	4	Rheb	Ras homolog enriched in brain [Source:MGI Symbol;Acc:MGI:97912]
9.25e-121	0.323376	0.595	0.461	3.94e-118	4	Ckb	creatine kinase, brain [Source:MGI Symbol;Acc:MGI:88407]
1e-28	0.322469	0.48	0.397	4.26e-26	4	Saraf	store-operated calcium entry-associated regulatory factor [Source:MGI Symbol;Acc:MGI:1915137]
0.000244	0.322383	0.441	0.368	1040671	4	Rnf13	ring finger protein 13 [Source:MGI Symbol;Acc:MGI:1346341]
4.75e-58	0.319322	0.509	0.401	2.02e-55	4	Pkm	pyruvate kinase, muscle [Source:MGI Symbol;Acc:MGI:97591]
1.17e-06	0.313447	0.46	0.408	0.000496	4	Pebp1	phosphatidylethanolamine binding protein 1 [Source:MGI Symbol;Acc:MGI:1344408]
2.53e-31	0.313025	0.496	0.407	1.08e-28	4	Hnrnpk	heterogeneous nuclear ribonucleoprotein K [Source:MGI Symbol;Acc:MGI:99894]
2.09e-43	0.307409	0.497	0.386	8.9e-41	4	Prdx2	peroxiredoxin 2 [Source:MGI Symbol;Acc:MGI:109486]
2.75e-21	0.298727	0.498	0.443	1.17e-18	4	Serpine2	serine (or cysteine) peptidase inhibitor, clade E, member 2 [Source:MGI Symbol;Acc:MGI:101780]
2.6e-09	0.293663	0.457	0.389	1.11e-06	4	Hsbp1	heat shock factor binding protein 1 [Source:MGI Symbol;Acc:MGI:1915446]
5.06e-65	0.292376	0.516	0.404	2.16e-62	4	Cd63	CD63 antigen [Source:MGI Symbol;Acc:MGI:99529]
9.48e-06	0.290981	0.456	0.414	0.00404	4	Uqcr10	ubiquinol-cytochrome c reductase, complex III subunit X [Source:MGI Symbol;Acc:MGI:1913402]
1.66e-26	0.289406	0.48	0.412	7.06e-24	4	Tspan7	tetraspanin 7 [Source:MGI Symbol;Acc:MGI:1298407]
3.38e-08	0.28214	0.449	0.391	1.44e-05	4	Calr	calreticulin [Source:MGI Symbol;Acc:MGI:88252]
5.2e-26	0.281923	0.454	0.374	2.21e-23	4	Srebf1	sterol regulatory element binding transcription factor 1 [Source:MGI Symbol;Acc:MGI:107606]
6.87e-40	0.275439	0.52	0.426	2.93e-37	4	Ldhb	lactate dehydrogenase B [Source:MGI Symbol;Acc:MGI:96763]
1.31e-07	0.271879	0.457	0.398	5.6e-05	4	Tkt	transketolase [Source:MGI Symbol;Acc:MGI:105992]
9.53e-21	0.2689	0.488	0.397	4.06e-18	4	BC031181	cDNA sequence BC031181 [Source:MGI Symbol;Acc:MGI:3039614]
3.34e-33	0.266177	0.453	0.359	1.42e-30	4	Ndufa3	NADH:ubiquinone oxidoreductase subunit A3 [Source:MGI Symbol;Acc:MGI:1913341]
4e-127	0.265899	0.577	0.441	1.7e-124	4	Apoe	apolipoprotein E [Source:MGI Symbol;Acc:MGI:88057]
2.29e-32	0.264679	0.487	0.399	9.75e-30	4	Atp5a1	ATP synthase, H+ transporting, mitochondrial F1 complex, alpha subunit 1 [Source:MGI Symbol;Acc:MGI:88115]
0	1.43262	0.621	0.401	0	5	Sat1	spermidine/spermine N1-acetyl transferase 1 [Source:MGI Symbol;Acc:MGI:98233]
2.64e-119	0.267397	0.45	0.34	1.12e-116	5	Map7d1	MAP7 domain containing 1 [Source:MGI Symbol;Acc:MGI:2384297]
2.79e-51	0.898937	0.324	0.336	1.19e-48	5	Atp6v1a	ATPase, H+ transporting, lysosomal V1 subunit A [Source:MGI Symbol;Acc:MGI:1201780]
4.9e-34	0.792194	0.294	0.334	2.09e-31	5	Rab18	RAB18, member RAS oncogene family [Source:MGI Symbol;Acc:MGI:102790]
1.27e-31	1.35365	0.333	0.355	5.4e-29	5	Ppp1cb	protein phosphatase 1 catalytic subunit beta [Source:MGI Symbol;Acc:MGI:104871]
1.28e-06	0.424523	0.315	0.391	0.000544	5	Fkbp1a	FK506 binding protein 1a [Source:MGI Symbol;Acc:MGI:95541]
0	18.2892	0.674	0.324	0	7	Rpl41	ribosomal protein L41 [Source:MGI Symbol;Acc:MGI:1915195]
0	16.0836	0.724	0.285	0	7	Rpl37	ribosomal protein L37 [Source:MGI Symbol;Acc:MGI:1914531]
2.58e-289	12.4591	0.588	0.371	1.1e-286	7	Zwint	ZW10 interactor [Source:MGI Symbol;Acc:MGI:1289227]
0	12.4524	0.683	0.283	0	7	Tmsb10	thymosin, beta 10 [Source:MGI Symbol;Acc:MGI:109146]
0	11.0531	0.603	0.331	0	7	Bex2	brain expressed X-linked 2 [Source:MGI Symbol;Acc:MGI:1338017]
0.0686	10.5904	0.4	0.387	292291494	7	Plp1	proteolipid protein (myelin) 1 [Source:MGI Symbol;Acc:MGI:97623]
1.64e-146	10.2868	0.503	0.362	7e-144	7	Map2	microtubule-associated protein 2 [Source:MGI Symbol;Acc:MGI:97175]
0	8.57728	0.676	0.347	0	7	Fth1	ferritin heavy polypeptide 1 [Source:MGI Symbol;Acc:MGI:95588]
0	8.32395	0.631	0.319	0	7	Rpl39	ribosomal protein L39 [Source:MGI Symbol;Acc:MGI:1914498]
0	7.20613	0.647	0.337	0	7	Rps21	ribosomal protein S21 [Source:MGI Symbol;Acc:MGI:1913731]
0	6.39523	0.667	0.311	0	7	Rpl38	ribosomal protein L38 [Source:MGI Symbol;Acc:MGI:1914921]
1.41e-73	5.37026	0.228	0.379	6e-71	7	H2-K1	histocompatibility 2, K1, K region [Source:MGI Symbol;Acc:MGI:95904]
2.81e-201	5.34511	0.616	0.431	1.2e-198	7	Rpl8	ribosomal protein L8 [Source:MGI Symbol;Acc:MGI:1350927]
2.84e-273	5.29758	0.564	0.36	1.21e-270	7	Ttc3	tetratricopeptide repeat domain 3 [Source:MGI Symbol;Acc:MGI:1276539]
0	4.84109	0.602	0.349	0	7	Ywhah	tyrosine 3-monooxygenase/tryptophan 5-monooxygenase activation protein, eta polypeptide [Source:MGI Symbol;Acc:MGI:109194]
0	4.60894	0.684	0.324	0	7	Rps24	ribosomal protein S24 [Source:MGI Symbol;Acc:MGI:98147]
0	4.35679	0.596	0.33	0	7	Rtn1	reticulon 1 [Source:MGI Symbol;Acc:MGI:1933947]
8.69e-14	4.30754	0.406	0.445	3.7e-11	7	Gpm6b	glycoprotein m6b [Source:MGI Symbol;Acc:MGI:107672]
1.25e-222	4.09329	0.57	0.361	5.34e-220	7	Hsp90aa1	heat shock protein 90, alpha (cytosolic), class A member 1 [Source:MGI Symbol;Acc:MGI:96250]
0	3.92496	0.653	0.36	0	7	Calm2	calmodulin 2 [Source:MGI Symbol;Acc:MGI:103250]
0	3.83369	0.672	0.346	0	7	Rpl22l1	ribosomal protein L22 like 1 [Source:MGI Symbol;Acc:MGI:1915278]
3.15e-185	3.67821	0.562	0.385	1.34e-182	7	Ahi1	Abelson helper integration site 1 [Source:MGI Symbol;Acc:MGI:87971]
0	3.61449	0.681	0.351	0	7	Rps19	ribosomal protein S19 [Source:MGI Symbol;Acc:MGI:1333780]
0	3.54356	0.562	0.31	0	7	Ndn	necdin, MAGE family member [Source:MGI Symbol;Acc:MGI:97290]
9.65e-262	3.16476	0.577	0.348	4.11e-259	7	Basp1	brain abundant, membrane attached signal protein 1 [Source:MGI Symbol;Acc:MGI:1917600]
0	3.09316	0.659	0.354	0	7	Rps11	ribosomal protein S11 [Source:MGI Symbol;Acc:MGI:1351329]
0.0188	2.67957	0.347	0.358	79979292	7	Hspa9	heat shock protein 9 [Source:MGI Symbol;Acc:MGI:96245]
6.88e-117	2.614	0.538	0.389	2.93e-114	7	Tuba1a	tubulin, alpha 1A [Source:MGI Symbol;Acc:MGI:98869]
1.18e-133	2.59402	0.58	0.416	5.03e-131	7	Cox7a2	cytochrome c oxidase subunit 7A2 [Source:MGI Symbol;Acc:MGI:1316715]
0	2.54872	0.594	0.354	0	7	Snrpn	small nuclear ribonucleoprotein N [Source:MGI Symbol;Acc:MGI:98347]
2.96e-113	2.5344	0.438	0.302	1.26e-110	7	Gprasp1	G protein-coupled receptor associated sorting protein 1 [Source:MGI Symbol;Acc:MGI:1917418]
0	2.45682	0.659	0.371	0	7	Rplp1	ribosomal protein, large, P1 [Source:MGI Symbol;Acc:MGI:1927099]
2.22e-136	2.44951	0.474	0.338	9.47e-134	7	Rnf187	ring finger protein 187 [Source:MGI Symbol;Acc:MGI:1914224]
2.36e-48	2.27427	0.512	0.382	1.01e-45	7	Cox5a	cytochrome c oxidase subunit 5A [Source:MGI Symbol;Acc:MGI:88474]
5.74e-77	2.09319	0.384	0.283	2.44e-74	7	Tmx4	thioredoxin-related transmembrane protein 4 [Source:MGI Symbol;Acc:MGI:106558]
1.2e-179	2.05427	0.54	0.361	5.13e-177	7	Tuba1b	tubulin, alpha 1B [Source:MGI Symbol;Acc:MGI:107804]
0	2.05415	0.649	0.4	0	7	Eef1a1	eukaryotic translation elongation factor 1 alpha 1 [Source:MGI Symbol;Acc:MGI:1096881]
0	2.05176	0.633	0.355	0	7	Rpl34	ribosomal protein L34 [Source:MGI Symbol;Acc:MGI:1915686]
0	1.99696	0.622	0.412	0	7	Tmsb4x	thymosin, beta 4, X chromosome [Source:MGI Symbol;Acc:MGI:99510]
0	1.81488	0.631	0.376	0	7	Rpl32	ribosomal protein L32 [Source:MGI Symbol;Acc:MGI:98038]
0	1.81427	0.599	0.368	0	7	Atpif1	ATPase inhibitory factor 1 [Source:MGI Symbol;Acc:MGI:1196457]
0	1.78686	0.656	0.378	0	7	Rpl26	ribosomal protein L26 [Source:MGI Symbol;Acc:MGI:106022]
7.47e-64	1.75181	0.39	0.29	3.18e-61	7	Flywch1	FLYWCH-type zinc finger 1 [Source:MGI Symbol;Acc:MGI:2442638]
0	1.74885	0.617	0.408	0	7	Cox8a	cytochrome c oxidase subunit 8A [Source:MGI Symbol;Acc:MGI:105959]
4.94e-21	1.73345	0.357	0.321	2.1e-18	7	Atp6v0e2	ATPase, H+ transporting, lysosomal V0 subunit E2 [Source:MGI Symbol;Acc:MGI:1923502]
0.000148	1.72272	0.398	0.436	0.0632	7	Mt3	metallothionein 3 [Source:MGI Symbol;Acc:MGI:97173]
0	1.7017	0.64	0.338	0	7	Rps2	ribosomal protein S2 [Source:MGI Symbol;Acc:MGI:105110]
0	1.7002	0.652	0.364	0	7	Rps3a1	ribosomal protein S3A1 [Source:MGI Symbol;Acc:MGI:1202063]
2.33e-159	1.63429	0.521	0.348	9.91e-157	7	Tubb5	tubulin, beta 5 class I [Source:MGI Symbol;Acc:MGI:107812]
1.87e-105	1.60288	0.527	0.404	7.95e-103	7	Rps15	ribosomal protein S15 [Source:MGI Symbol;Acc:MGI:98117]
0	1.54268	0.606	0.366	0	7	Rps3	ribosomal protein S3 [Source:MGI Symbol;Acc:MGI:1350917]
7.62e-305	1.53413	0.611	0.401	3.25e-302	7	Calm1	calmodulin 1 [Source:MGI Symbol;Acc:MGI:88251]
0	1.51921	0.608	0.383	0	7	mt-Nd1	mitochondrially encoded NADH dehydrogenase 1 [Source:MGI Symbol;Acc:MGI:101787]
5.41e-277	1.45708	0.576	0.343	2.3e-274	7	Rps18	ribosomal protein S18 [Source:MGI Symbol;Acc:MGI:98146]
0	1.4195	0.607	0.363	0	7	Rps5	ribosomal protein S5 [Source:MGI Symbol;Acc:MGI:1097682]
0	1.41194	0.591	0.366	0	7	Cox7c	cytochrome c oxidase subunit 7C [Source:MGI Symbol;Acc:MGI:103226]
7.32e-62	1.36902	0.443	0.375	3.12e-59	7	Pea15a	proliferation and apoptosis adaptor protein 15A [Source:MGI Symbol;Acc:MGI:104799]
0	1.33894	0.581	0.331	0	7	Rps26	ribosomal protein S26 [Source:MGI Symbol;Acc:MGI:1351628]
4.75e-73	1.29741	0.455	0.357	2.02e-70	7	Impact	impact, RWD domain protein [Source:MGI Symbol;Acc:MGI:1098233]
1.91e-121	1.28863	0.495	0.354	8.14e-119	7	Gnb1	guanine nucleotide binding protein (G protein), beta 1 [Source:MGI Symbol;Acc:MGI:95781]
5.91e-158	1.28471	0.571	0.393	2.52e-155	7	Hsp90ab1	heat shock protein 90 alpha (cytosolic), class B member 1 [Source:MGI Symbol;Acc:MGI:96247]
2.6e-84	1.26248	0.43	0.334	1.11e-81	7	Pja2	praja ring finger ubiquitin ligase 2 [Source:MGI Symbol;Acc:MGI:2159342]
0	1.24535	0.604	0.392	0	7	Gnas	GNAS (guanine nucleotide binding protein, alpha stimulating) complex locus [Source:MGI Symbol;Acc:MGI:95777]
5.01e-113	1.24463	0.512	0.359	2.13e-110	7	Ywhaq	tyrosine 3-monooxygenase/tryptophan 5-monooxygenase activation protein theta [Source:MGI Symbol;Acc:MGI:891963]
6.29e-65	1.22214	0.458	0.371	2.68e-62	7	Rpl4	ribosomal protein L4 [Source:MGI Symbol;Acc:MGI:1915141]
9.97e-65	1.21493	0.403	0.322	4.25e-62	7	Atp6v1a	ATPase, H+ transporting, lysosomal V1 subunit A [Source:MGI Symbol;Acc:MGI:1201780]
4.58e-78	1.19665	0.491	0.352	1.95e-75	7	Uqcc2	ubiquinol-cytochrome c reductase complex assembly factor 2 [Source:MGI Symbol;Acc:MGI:1914517]
4.8e-245	1.19496	0.574	0.358	2.04e-242	7	Calm3	calmodulin 3 [Source:MGI Symbol;Acc:MGI:103249]
5.3e-124	1.18538	0.498	0.359	2.26e-121	7	Fkbp1a	FK506 binding protein 1a [Source:MGI Symbol;Acc:MGI:95541]
1.03e-110	1.17885	0.499	0.344	4.37e-108	7	Maged1	MAGE family member D1 [Source:MGI Symbol;Acc:MGI:1930187]
1.7e-282	1.16995	0.586	0.386	7.23e-280	7	Ubb	ubiquitin B [Source:MGI Symbol;Acc:MGI:98888]
0.0107	1.15813	0.362	0.397	45575714	7	Ddrgk1	DDRGK domain containing 1 [Source:MGI Symbol;Acc:MGI:1924256]
0	1.15033	0.629	0.42	0	7	mt-Nd4	mitochondrially encoded NADH dehydrogenase 4 [Source:MGI Symbol;Acc:MGI:102498]
3.64e-59	1.14487	0.452	0.361	1.55e-56	7	Thra	thyroid hormone receptor alpha [Source:MGI Symbol;Acc:MGI:98742]
4.49e-201	1.13132	0.579	0.385	1.91e-198	7	Pebp1	phosphatidylethanolamine binding protein 1 [Source:MGI Symbol;Acc:MGI:1344408]
3.92e-198	1.12851	0.587	0.406	1.67e-195	7	Rpl14	ribosomal protein L14 [Source:MGI Symbol;Acc:MGI:1914365]
1.65e-48	1.11619	0.445	0.376	7.01e-46	7	Kif1a	kinesin family member 1A [Source:MGI Symbol;Acc:MGI:108391]
6.88e-164	1.10357	0.543	0.379	2.93e-161	7	Mrfap1	Morf4 family associated protein 1 [Source:MGI Symbol;Acc:MGI:1914818]
5.07e-112	1.10084	0.508	0.367	2.16e-109	7	Map1lc3a	microtubule-associated protein 1 light chain 3 alpha [Source:MGI Symbol;Acc:MGI:1915661]
4987723	1.09693	0.298	0.334	1	7	Tmem9b	TMEM9 domain family, member B [Source:MGI Symbol;Acc:MGI:1915254]
0	1.08131	0.623	0.377	0	7	Rplp2	ribosomal protein, large P2 [Source:MGI Symbol;Acc:MGI:1914436]
1.45e-73	1.05885	0.456	0.367	6.19e-71	7	Eef2	eukaryotic translation elongation factor 2 [Source:MGI Symbol;Acc:MGI:95288]
7.28e-29	1.03821	0.47	0.392	3.1e-26	7	Prkar1a	protein kinase, cAMP dependent regulatory, type I, alpha [Source:MGI Symbol;Acc:MGI:104878]
3.74e-45	1.0142	0.452	0.364	1.59e-42	7	Ndufv3	NADH:ubiquinone oxidoreductase core subunit V3 [Source:MGI Symbol;Acc:MGI:1890894]
4.3e-172	1.00955	0.53	0.337	1.83e-169	7	Mtch1	mitochondrial carrier 1 [Source:MGI Symbol;Acc:MGI:1929261]
1.04e-106	1.00043	0.539	0.373	4.41e-104	7	Myl6	myosin, light polypeptide 6, alkali, smooth muscle and non-muscle [Source:MGI Symbol;Acc:MGI:109318]
7.66e-45	0.999258	0.363	0.297	3.26e-42	7	Morf4l2	mortality factor 4 like 2 [Source:MGI Symbol;Acc:MGI:1927167]
1.03e-80	0.9926	0.497	0.366	4.41e-78	7	Dpysl2	dihydropyrimidinase-like 2 [Source:MGI Symbol;Acc:MGI:1349763]
1.2e-66	0.978131	0.374	0.477	5.13e-64	7	Ndrg2	N-myc downstream regulated gene 2 [Source:MGI Symbol;Acc:MGI:1352498]
9e-261	0.964122	0.569	0.369	3.83e-258	7	Cox6c	cytochrome c oxidase subunit 6C [Source:MGI Symbol;Acc:MGI:104614]
4.07e-118	0.959474	0.533	0.366	1.73e-115	7	Mif	macrophage migration inhibitory factor (glycosylation-inhibiting factor) [Source:MGI Symbol;Acc:MGI:96982]
3.06e-08	0.954242	0.273	0.269	1.3e-05	7	Psmd2	proteasome (prosome, macropain) 26S subunit, non-ATPase, 2 [Source:MGI Symbol;Acc:MGI:1096584]
3.53e-23	0.944223	0.436	0.374	1.5e-20	7	Skp1a	NA
1.09e-36	0.92768	0.382	0.305	4.65e-34	7	Rrp1	ribosomal RNA processing 1 [Source:MGI Symbol;Acc:MGI:1203500]
1.06e-60	0.925882	0.454	0.349	4.53e-58	7	Fkbp3	FK506 binding protein 3 [Source:MGI Symbol;Acc:MGI:1353460]
3.04e-50	0.919753	0.36	0.29	1.3e-47	7	Pld3	phospholipase D family, member 3 [Source:MGI Symbol;Acc:MGI:1333782]
7.45e-56	0.919047	0.52	0.424	3.17e-53	7	Eif4a2	eukaryotic translation initiation factor 4A2 [Source:MGI Symbol;Acc:MGI:106906]
5.27e-65	0.872759	0.484	0.371	2.24e-62	7	Actb	actin, beta [Source:MGI Symbol;Acc:MGI:87904]
5.11e-45	0.872484	0.483	0.363	2.18e-42	7	Ndufb8	NADH:ubiquinone oxidoreductase subunit B8 [Source:MGI Symbol;Acc:MGI:1914514]
6.09e-58	0.869066	0.49	0.372	2.6e-55	7	Morf4l1	mortality factor 4 like 1 [Source:MGI Symbol;Acc:MGI:1096551]
1.52e-189	0.855076	0.585	0.4	6.46e-187	7	Cox6b1	cytochrome c oxidase, subunit 6B1 [Source:MGI Symbol;Acc:MGI:107460]
2.6e-133	0.849438	0.501	0.335	1.11e-130	7	Gm1673	predicted gene 1673 [Source:MGI Symbol;Acc:MGI:2686519]
3.9e-61	0.843735	0.313	0.406	1.66e-58	7	Scd2	stearoyl-Coenzyme A desaturase 2 [Source:MGI Symbol;Acc:MGI:98240]
1.41e-88	0.819183	0.492	0.35	5.99e-86	7	Ndufa3	NADH:ubiquinone oxidoreductase subunit A3 [Source:MGI Symbol;Acc:MGI:1913341]
9.51e-55	0.804	0.499	0.376	4.05e-52	7	Atp6v1f	ATPase, H+ transporting, lysosomal V1 subunit F [Source:MGI Symbol;Acc:MGI:1913394]
1.88e-18	0.802499	0.237	0.338	8e-16	7	Sec11a	SEC11 homolog A, signal peptidase complex subunit [Source:MGI Symbol;Acc:MGI:1929464]
5.77e-180	0.794255	0.563	0.372	2.46e-177	7	Rps14	ribosomal protein S14 [Source:MGI Symbol;Acc:MGI:98107]
8.17e-51	0.790303	0.451	0.372	3.48e-48	7	Vamp2	vesicle-associated membrane protein 2 [Source:MGI Symbol;Acc:MGI:1313277]
0	0.783778	0.68	0.368	0	7	mt-Cytb	mitochondrially encoded cytochrome b [Source:MGI Symbol;Acc:MGI:102501]
8.49e-67	0.77671	0.518	0.398	3.61e-64	7	Prdx5	peroxiredoxin 5 [Source:MGI Symbol;Acc:MGI:1859821]
1.43e-45	0.773104	0.514	0.427	6.08e-43	7	Cox6a1	cytochrome c oxidase subunit 6A1 [Source:MGI Symbol;Acc:MGI:103099]
6.65e-77	0.761632	0.51	0.367	2.83e-74	7	Rplp0	ribosomal protein, large, P0 [Source:MGI Symbol;Acc:MGI:1927636]
6.6e-66	0.754241	0.503	0.393	2.81e-63	7	Npm1	nucleophosmin 1 [Source:MGI Symbol;Acc:MGI:106184]
2.34e-165	0.74785	0.566	0.382	9.99e-163	7	Naca	nascent polypeptide-associated complex alpha polypeptide [Source:MGI Symbol;Acc:MGI:106095]
3.4e-19	0.745226	0.453	0.374	1.45e-16	7	Fkbp2	FK506 binding protein 2 [Source:MGI Symbol;Acc:MGI:95542]
3.58e-89	0.742472	0.528	0.39	1.52e-86	7	Gabarapl2	gamma-aminobutyric acid (GABA) A receptor-associated protein-like 2 [Source:MGI Symbol;Acc:MGI:1890602]
2.26e-65	0.739327	0.43	0.328	9.64e-63	7	Snap47	synaptosomal-associated protein, 47 [Source:MGI Symbol;Acc:MGI:1915076]
3.45e-06	0.737307	0.394	0.362	0.00147	7	Tuba4a	tubulin, alpha 4A [Source:MGI Symbol;Acc:MGI:1095410]
2.66e-47	0.736696	0.486	0.394	1.13e-44	7	Swi5	SWI5 recombination repair homolog (yeast) [Source:MGI Symbol;Acc:MGI:1920181]
1.09e-55	0.732707	0.389	0.343	4.65e-53	7	Syn2	synapsin II [Source:MGI Symbol;Acc:MGI:103020]
5.13e-29	0.719112	0.435	0.366	2.19e-26	7	Arf1	ADP-ribosylation factor 1 [Source:MGI Symbol;Acc:MGI:99431]
2.07e-125	0.715851	0.571	0.414	8.82e-123	7	Oaz1	ornithine decarboxylase antizyme 1 [Source:MGI Symbol;Acc:MGI:109433]
1.64e-55	0.714848	0.46	0.364	7e-53	7	Zcchc18	zinc finger, CCHC domain containing 18 [Source:MGI Symbol;Acc:MGI:1914245]
1.2e-07	0.703109	0.318	0.314	5.12e-05	7	Capzb	capping actin protein of muscle Z-line subunit beta [Source:MGI Symbol;Acc:MGI:104652]
3.08e-80	0.702168	0.523	0.395	1.31e-77	7	Pkm	pyruvate kinase, muscle [Source:MGI Symbol;Acc:MGI:97591]
3.87e-131	0.686668	0.557	0.414	1.65e-128	7	Ndufa4	Ndufa4, mitochondrial complex associated [Source:MGI Symbol;Acc:MGI:107686]
2.66e-47	0.684968	0.338	0.301	1.14e-44	7	Kifap3	kinesin-associated protein 3 [Source:MGI Symbol;Acc:MGI:107566]
0.0187	0.677792	0.412	0.38	79842387	7	Vdac1	voltage-dependent anion channel 1 [Source:MGI Symbol;Acc:MGI:106919]
0.00121	0.670931	0.37	0.375	5142763	7	Sdha	succinate dehydrogenase complex, subunit A, flavoprotein (Fp) [Source:MGI Symbol;Acc:MGI:1914195]
1.79e-103	0.668352	0.562	0.409	7.65e-101	7	Hint1	histidine triad nucleotide binding protein 1 [Source:MGI Symbol;Acc:MGI:1321133]
1.37e-24	0.663935	0.383	0.343	5.83e-22	7	Fkbp8	FK506 binding protein 8 [Source:MGI Symbol;Acc:MGI:1341070]
2.02e-14	0.658626	0.405	0.378	8.59e-12	7	Ncl	nucleolin [Source:MGI Symbol;Acc:MGI:97286]
3.09e-32	0.658397	0.393	0.332	1.32e-29	7	Arhgdia	Rho GDP dissociation inhibitor (GDI) alpha [Source:MGI Symbol;Acc:MGI:2178103]
2.37e-172	0.655987	0.591	0.403	1.01e-169	7	Atp5j2	ATP synthase, H+ transporting, mitochondrial F0 complex, subunit F2 [Source:MGI Symbol;Acc:MGI:1927558]
5.06e-126	0.655948	0.538	0.395	2.15e-123	7	Cox5b	cytochrome c oxidase subunit 5B [Source:MGI Symbol;Acc:MGI:88475]
0.0604	0.647672	0.309	0.334	257399584	7	Smarcc2	SWI/SNF related, matrix associated, actin dependent regulator of chromatin, subfamily c, member 2 [Source:MGI Symbol;Acc:MGI:1915344]
1.31e-136	0.643528	0.543	0.361	5.58e-134	7	Ubl5	ubiquitin-like 5 [Source:MGI Symbol;Acc:MGI:1913427]
3.2e-40	0.635579	0.487	0.362	1.36e-37	7	Atp5j	ATP synthase, H+ transporting, mitochondrial F0 complex, subunit F [Source:MGI Symbol;Acc:MGI:107777]
2.77e-49	0.632314	0.49	0.394	1.18e-46	7	Sub1	SUB1 homolog, transcriptional regulator [Source:MGI Symbol;Acc:MGI:104811]
3.51e-58	0.627918	0.46	0.404	1.49e-55	7	Tagln3	transgelin 3 [Source:MGI Symbol;Acc:MGI:1926784]
4.04e-150	0.613086	0.559	0.396	1.72e-147	7	Rps9	ribosomal protein S9 [Source:MGI Symbol;Acc:MGI:1924096]
1.06e-77	0.574575	0.531	0.409	4.49e-75	7	Atp5h	ATP synthase, H+ transporting, mitochondrial F0 complex, subunit D [Source:MGI Symbol;Acc:MGI:1918929]
1.62e-42	0.550506	0.548	0.448	6.89e-40	7	Ywhae	tyrosine 3-monooxygenase/tryptophan 5-monooxygenase activation protein, epsilon polypeptide [Source:MGI Symbol;Acc:MGI:894689]
6.85e-35	0.547281	0.49	0.415	2.92e-32	7	Aldoa	aldolase A, fructose-bisphosphate [Source:MGI Symbol;Acc:MGI:87994]
7.92e-09	0.547046	0.388	0.37	3.37e-06	7	Ddx24	DEAD box helicase 24 [Source:MGI Symbol;Acc:MGI:1351337]
1.57e-23	0.530755	0.41	0.368	6.68e-21	7	Rtn4	reticulon 4 [Source:MGI Symbol;Acc:MGI:1915835]
3.59e-69	0.529674	0.54	0.406	1.53e-66	7	Uqcrb	ubiquinol-cytochrome c reductase binding protein [Source:MGI Symbol;Acc:MGI:1914780]
3.4e-22	0.52616	0.405	0.362	1.45e-19	7	Arpp19	cAMP-regulated phosphoprotein 19 [Source:MGI Symbol;Acc:MGI:1891691]
8.12e-41	0.524644	0.514	0.419	3.46e-38	7	Mdh1	malate dehydrogenase 1, NAD (soluble) [Source:MGI Symbol;Acc:MGI:97051]
4.04e-18	0.523348	0.336	0.298	1.72e-15	7	Pcmt1	protein-L-isoaspartate (D-aspartate) O-methyltransferase 1 [Source:MGI Symbol;Acc:MGI:97502]
9.46e-07	0.508716	0.361	0.337	0.000403	7	St13	suppression of tumorigenicity 13 [Source:MGI Symbol;Acc:MGI:1917606]
0	0.508382	0.271	0.479	0	7	Mt2	metallothionein 2 [Source:MGI Symbol;Acc:MGI:97172]
7.68e-41	0.481966	0.488	0.368	3.27e-38	7	Ndufb5	NADH:ubiquinone oxidoreductase subunit B5 [Source:MGI Symbol;Acc:MGI:1913296]
1.28e-14	0.471934	0.439	0.374	5.45e-12	7	Dnaja1	DnaJ heat shock protein family (Hsp40) member A1 [Source:MGI Symbol;Acc:MGI:1270129]
2.81e-40	0.469352	0.47	0.385	1.2e-37	7	Hsbp1	heat shock factor binding protein 1 [Source:MGI Symbol;Acc:MGI:1915446]
1.34e-25	0.458843	0.515	0.432	5.7e-23	7	Ptma	prothymosin alpha [Source:MGI Symbol;Acc:MGI:97803]
8.85e-44	0.458798	0.497	0.389	3.77e-41	7	Atp5g3	ATP synthase, H+ transporting, mitochondrial F0 complex, subunit C3 (subunit 9) [Source:MGI Symbol;Acc:MGI:2442035]
3.41e-28	0.456086	0.304	0.287	1.45e-25	7	Blcap	bladder cancer associated protein [Source:MGI Symbol;Acc:MGI:1858907]
3.42e-05	0.452997	0.452	0.402	0.0146	7	Atp5a1	ATP synthase, H+ transporting, mitochondrial F1 complex, alpha subunit 1 [Source:MGI Symbol;Acc:MGI:88115]
3.05e-21	0.450389	0.471	0.405	1.3e-18	7	Mdh2	malate dehydrogenase 2, NAD (mitochondrial) [Source:MGI Symbol;Acc:MGI:97050]
1.92e-14	0.436854	0.348	0.321	8.18e-12	7	Capns1	calpain, small subunit 1 [Source:MGI Symbol;Acc:MGI:88266]
1.46e-08	0.431716	0.38	0.362	6.22e-06	7	Npdc1	neural proliferation, differentiation and control 1 [Source:MGI Symbol;Acc:MGI:1099802]
3.66e-39	0.426583	0.511	0.438	1.56e-36	7	Hspa8	heat shock protein 8 [Source:MGI Symbol;Acc:MGI:105384]
0.00654	0.415805	0.329	0.317	2785847	7	Cct8	chaperonin containing Tcp1, subunit 8 (theta) [Source:MGI Symbol;Acc:MGI:107183]
0.000283	0.414886	0.338	0.334	1207069	7	Vcp	valosin containing protein [Source:MGI Symbol;Acc:MGI:99919]
0.00941	0.41214	0.334	0.325	40086136	7	Cct3	chaperonin containing Tcp1, subunit 3 (gamma) [Source:MGI Symbol;Acc:MGI:104708]
380511	0.407003	0.419	0.395	1	7	Gpi1	glucose-6-phosphate isomerase 1 [Source:MGI Symbol;Acc:MGI:95797]
3.77e-05	0.404936	0.361	0.372	0.0161	7	Mycbp2	MYC binding protein 2, E3 ubiquitin protein ligase [Source:MGI Symbol;Acc:MGI:2179432]
4.06e-50	0.3994	0.507	0.395	1.73e-47	7	Ftl1	ferritin light polypeptide 1 [Source:MGI Symbol;Acc:MGI:95589]
1.41e-19	0.391849	0.453	0.376	5.99e-17	7	Vdac3	voltage-dependent anion channel 3 [Source:MGI Symbol;Acc:MGI:106922]
0.00133	0.383932	0.454	0.424	5686253	7	Gabbr1	gamma-aminobutyric acid (GABA) B receptor, 1 [Source:MGI Symbol;Acc:MGI:1860139]
4.18e-29	0.37937	0.357	0.322	1.78e-26	7	Ube2d2a	ubiquitin-conjugating enzyme E2D 2A [Source:MGI Symbol;Acc:MGI:1930715]
2.18e-06	0.377918	0.485	0.43	0.000927	7	Atp5b	ATP synthase, H+ transporting mitochondrial F1 complex, beta subunit [Source:MGI Symbol;Acc:MGI:107801]
1.13e-47	0.361808	0.503	0.374	4.83e-45	7	Ndufa11	NADH:ubiquinone oxidoreductase subunit A11 [Source:MGI Symbol;Acc:MGI:1917125]
1.64e-12	0.3511	0.37	0.348	6.98e-10	7	Eif2s2	eukaryotic translation initiation factor 2, subunit 2 (beta) [Source:MGI Symbol;Acc:MGI:1914454]
6.44e-06	0.326021	0.491	0.441	0.00274	7	H3f3b	H3.3 histone B [Source:MGI Symbol;Acc:MGI:1101768]
7.94e-24	0.324002	0.48	0.394	3.38e-21	7	Pfn2	profilin 2 [Source:MGI Symbol;Acc:MGI:97550]
8.57e-52	0.322753	0.349	0.422	3.65e-49	7	Ctsd	cathepsin D [Source:MGI Symbol;Acc:MGI:88562]
2.87e-13	0.315995	0.316	0.313	1.22e-10	7	Ociad1	OCIA domain containing 1 [Source:MGI Symbol;Acc:MGI:1915345]
5430401	0.310746	0.48	0.437	1	7	Slc25a4	solute carrier family 25 (mitochondrial carrier, adenine nucleotide translocator), member 4 [Source:MGI Symbol;Acc:MGI:1353495]
2.55e-68	0.308384	0.505	0.36	1.09e-65	7	Ndufab1	NADH:ubiquinone oxidoreductase subunit AB1 [Source:MGI Symbol;Acc:MGI:1917566]
5.64e-34	0.302298	0.491	0.389	2.4e-31	7	Clta	clathrin, light polypeptide (Lca) [Source:MGI Symbol;Acc:MGI:894297]
0.0131	0.301802	0.308	0.361	55713972	7	Ptpra	protein tyrosine phosphatase, receptor type, A [Source:MGI Symbol;Acc:MGI:97808]
5.05e-05	0.295439	0.428	0.396	0.0215	7	Rheb	Ras homolog enriched in brain [Source:MGI Symbol;Acc:MGI:97912]
1.3e-18	0.289419	0.528	0.459	5.56e-16	7	Eif1	eukaryotic translation initiation factor 1 [Source:MGI Symbol;Acc:MGI:105125]
0.00542	0.286431	0.42	0.374	23081747	7	Psma2	proteasome subunit alpha 2 [Source:MGI Symbol;Acc:MGI:104885]
3.5e-193	0.261581	0.552	0.358	1.49e-190	7	Atp5e	ATP synthase, H+ transporting, mitochondrial F1 complex, epsilon subunit [Source:MGI Symbol;Acc:MGI:1855697]
3.58e-21	0.257912	0.48	0.391	1.53e-18	7	Tubb2a	tubulin, beta 2A class IIA [Source:MGI Symbol;Acc:MGI:107861]
0.000678	0.257225	0.332	0.328	2886357	7	Rab18	RAB18, member RAS oncogene family [Source:MGI Symbol;Acc:MGI:102790]
1.89e-06	0.253463	0.439	0.398	0.000805	7	Aplp1	amyloid beta (A4) precursor-like protein 1 [Source:MGI Symbol;Acc:MGI:88046]
0	4.80459	0.988	0.349	0	8	Actb	actin, beta [Source:MGI Symbol;Acc:MGI:87904]
1.99e-88	1.01927	0.563	0.375	8.49e-86	8	Dpysl2	dihydropyrimidinase-like 2 [Source:MGI Symbol;Acc:MGI:1349763]
4.69e-65	0.553583	0.542	0.391	2e-62	8	Prdx1	peroxiredoxin 1 [Source:MGI Symbol;Acc:MGI:99523]
1.99e-62	0.873435	0.589	0.413	8.5e-60	8	Srsf2	serine and arginine-rich splicing factor 2 [Source:MGI Symbol;Acc:MGI:98284]
2.04e-41	0.859694	0.535	0.366	8.69e-39	8	Gnb1	guanine nucleotide binding protein (G protein), beta 1 [Source:MGI Symbol;Acc:MGI:95781]
1.02e-39	0.372744	0.546	0.432	4.33e-37	8	Ldhb	lactate dehydrogenase B [Source:MGI Symbol;Acc:MGI:96763]
1.17e-37	0.517655	0.55	0.454	4.97e-35	8	Ttyh1	tweety family member 1 [Source:MGI Symbol;Acc:MGI:1889007]
7.31e-21	0.495246	0.526	0.408	3.11e-18	8	Srrm2	serine/arginine repetitive matrix 2 [Source:MGI Symbol;Acc:MGI:1923206]
3.66e-20	0.642115	0.288	0.335	1.56e-17	8	Tmem30a	transmembrane protein 30A [Source:MGI Symbol;Acc:MGI:106402]
3.16e-18	0.30279	0.492	0.426	1.35e-15	8	Sat1	spermidine/spermine N1-acetyl transferase 1 [Source:MGI Symbol;Acc:MGI:98233]
9.7e-17	0.316743	0.461	0.397	4.13e-14	8	Prdx2	peroxiredoxin 2 [Source:MGI Symbol;Acc:MGI:109486]
1.46e-15	0.413805	0.519	0.456	6.2e-13	8	Ncam1	neural cell adhesion molecule 1 [Source:MGI Symbol;Acc:MGI:97281]
2.37e-14	0.946759	0.222	0.306	1.01e-11	8	Pld3	phospholipase D family, member 3 [Source:MGI Symbol;Acc:MGI:1333782]
5.44e-14	0.271758	0.535	0.465	2.32e-11	8	Eif1	eukaryotic translation initiation factor 1 [Source:MGI Symbol;Acc:MGI:105125]
8.93e-13	0.641602	0.39	0.412	3.8e-10	8	Pafah1b1	platelet-activating factor acetylhydrolase, isoform 1b, subunit 1 [Source:MGI Symbol;Acc:MGI:109520]
3.19e-12	0.291783	0.457	0.413	1.36e-09	8	Slc25a3	solute carrier family 25 (mitochondrial carrier, phosphate carrier), member 3 [Source:MGI Symbol;Acc:MGI:1353498]
6.27e-12	0.411084	0.486	0.384	2.67e-09	8	Rhoa	ras homolog family member A [Source:MGI Symbol;Acc:MGI:1096342]
6.78e-11	0.352068	0.444	0.334	2.89e-08	8	St13	suppression of tumorigenicity 13 [Source:MGI Symbol;Acc:MGI:1917606]
4.58e-08	0.48107	0.436	0.378	1.95e-05	8	Atp5j	ATP synthase, H+ transporting, mitochondrial F0 complex, subunit F [Source:MGI Symbol;Acc:MGI:107777]
3.52e-05	0.989821	0.317	0.338	0.015	8	Pik3r1	phosphoinositide-3-kinase regulatory subunit 1 [Source:MGI Symbol;Acc:MGI:97583]
0.000404	0.260315	0.473	0.44	1722241	8	Eno1	enolase 1, alpha non-neuron [Source:MGI Symbol;Acc:MGI:95393]
0.000718	0.594476	0.379	0.385	3060514	8	Rpl4	ribosomal protein L4 [Source:MGI Symbol;Acc:MGI:1915141]
0.000971	0.480917	0.423	0.355	4137126	8	Ndufv2	NADH:ubiquinone oxidoreductase core subunit V2 [Source:MGI Symbol;Acc:MGI:1920150]
0.00112	0.331439	0.346	0.37	4777505	8	Arpp19	cAMP-regulated phosphoprotein 19 [Source:MGI Symbol;Acc:MGI:1891691]
0.0101	1.9761	0.367	0.383	42938794	8	Psmc5	protease (prosome, macropain) 26S subunit, ATPase 5 [Source:MGI Symbol;Acc:MGI:105047]
0.0398	0.276442	0.324	0.349	169426943	8	Cnpy2	canopy FGF signaling regulator 2 [Source:MGI Symbol;Acc:MGI:1928477]
0.0683	0.282827	0.435	0.397	291127021	8	Cox6c	cytochrome c oxidase subunit 6C [Source:MGI Symbol;Acc:MGI:104614]
2193026	0.338701	0.408	0.368	934229164	8	Tmem176b	transmembrane protein 176B [Source:MGI Symbol;Acc:MGI:1916348]
3888909	2.38989	0.45	0.416	1	8	Cfl1	cofilin 1, non-muscle [Source:MGI Symbol;Acc:MGI:101757]
5264789	1.02976	0.446	0.415	1	8	Gstm1	glutathione S-transferase, mu 1 [Source:MGI Symbol;Acc:MGI:95860]
6898282	0.728825	0.445	0.41	1	8	Ftl1	ferritin light polypeptide 1 [Source:MGI Symbol;Acc:MGI:95589]
9618338	0.26631	0.472	0.426	1	8	Mlf2	myeloid leukemia factor 2 [Source:MGI Symbol;Acc:MGI:1353554]
1.78e-29	5.905	0.374	0.42	7.6e-27	9	Cfl1	cofilin 1, non-muscle [Source:MGI Symbol;Acc:MGI:101757]
0.00691	4.79975	0.456	0.432	2942246	9	Fus	fused in sarcoma [Source:MGI Symbol;Acc:MGI:1353633]
7.89e-181	3.85923	0.677	0.421	3.36e-178	9	Clu	clusterin [Source:MGI Symbol;Acc:MGI:88423]
0	3.11905	0.806	0.442	0	9	Apoe	apolipoprotein E [Source:MGI Symbol;Acc:MGI:88057]
5.34e-115	2.57298	0.625	0.429	2.27e-112	9	Itih3	inter-alpha trypsin inhibitor, heavy chain 3 [Source:MGI Symbol;Acc:MGI:96620]
3.04e-262	2.34885	0.74	0.45	1.3e-259	9	Agt	angiotensinogen (serpin peptidase inhibitor, clade A, member 8) [Source:MGI Symbol;Acc:MGI:87963]
8.82e-39	2.34755	0.556	0.42	3.76e-36	9	Cspg5	chondroitin sulfate proteoglycan 5 [Source:MGI Symbol;Acc:MGI:1352747]
0.0179	2.20635	0.456	0.381	76179768	9	Srebf1	sterol regulatory element binding transcription factor 1 [Source:MGI Symbol;Acc:MGI:107606]
5.42e-187	1.88383	0.685	0.434	2.31e-184	9	Slc6a11	solute carrier family 6 (neurotransmitter transporter, GABA), member 11 [Source:MGI Symbol;Acc:MGI:95630]
2.11e-75	1.84534	0.598	0.426	8.99e-73	9	Slc7a10	solute carrier family 7 (cationic amino acid transporter, y+ system), member 10 [Source:MGI Symbol;Acc:MGI:1858261]
4.33e-50	1.83555	0.569	0.434	1.84e-47	9	Laptm4a	lysosomal-associated protein transmembrane 4A [Source:MGI Symbol;Acc:MGI:108017]
2.75e-162	1.82606	0.676	0.446	1.17e-159	9	Bcan	brevican [Source:MGI Symbol;Acc:MGI:1096385]
6906929	1.72838	0.449	0.39	1	9	Nptn	neuroplastin [Source:MGI Symbol;Acc:MGI:108077]
2.94e-222	1.71873	0.706	0.431	1.25e-219	9	Cd81	CD81 antigen [Source:MGI Symbol;Acc:MGI:1096398]
5.39e-48	1.68081	0.57	0.404	2.29e-45	9	Ctsd	cathepsin D [Source:MGI Symbol;Acc:MGI:88562]
1.31e-18	1.67837	0.539	0.408	5.58e-16	9	Hspa5	heat shock protein 5 [Source:MGI Symbol;Acc:MGI:95835]
1.15e-157	1.64841	0.688	0.451	4.92e-155	9	Gpr37l1	G protein-coupled receptor 37-like 1 [Source:MGI Symbol;Acc:MGI:1928503]
2.37e-65	1.55275	0.587	0.378	1.01e-62	9	Hacd2	3-hydroxyacyl-CoA dehydratase 2 [Source:MGI Symbol;Acc:MGI:1918007]
2.46e-136	1.55224	0.654	0.408	1.05e-133	9	Cd63	CD63 antigen [Source:MGI Symbol;Acc:MGI:99529]
1.39e-177	1.51436	0.705	0.472	5.92e-175	9	Sparcl1	SPARC-like 1 [Source:MGI Symbol;Acc:MGI:108110]
3.03e-23	1.45876	0.553	0.453	1.29e-20	9	Pla2g7	phospholipase A2, group VII (platelet-activating factor acetylhydrolase, plasma) [Source:MGI Symbol;Acc:MGI:1351327]
3.49e-82	1.4469	0.605	0.429	1.49e-79	9	Itm2c	integral membrane protein 2C [Source:MGI Symbol;Acc:MGI:1927594]
1.24e-114	1.44239	0.63	0.415	5.29e-112	9	Itm2b	integral membrane protein 2B [Source:MGI Symbol;Acc:MGI:1309517]
1.81e-57	1.44102	0.605	0.428	7.72e-55	9	Ctsl	cathepsin L [Source:MGI Symbol;Acc:MGI:88564]
5.2e-124	1.42222	0.651	0.439	2.21e-121	9	Ntrk2	neurotrophic tyrosine kinase, receptor, type 2 [Source:MGI Symbol;Acc:MGI:97384]
2.71e-106	1.41875	0.647	0.451	1.15e-103	9	Gja1	gap junction protein, alpha 1 [Source:MGI Symbol;Acc:MGI:95713]
0.00256	1.35029	0.33	0.396	10886084	9	Srpk2	serine/arginine-rich protein specific kinase 2 [Source:MGI Symbol;Acc:MGI:1201408]
5.68e-74	1.34595	0.586	0.408	2.42e-71	9	Ptn	pleiotrophin [Source:MGI Symbol;Acc:MGI:97804]
1.06e-40	1.34479	0.584	0.41	4.54e-38	9	Arl6ip1	ADP-ribosylation factor-like 6 interacting protein 1 [Source:MGI Symbol;Acc:MGI:1858943]
1.84e-72	1.34171	0.577	0.392	7.86e-70	9	Mlc1	megalencephalic leukoencephalopathy with subcortical cysts 1 homolog (human) [Source:MGI Symbol;Acc:MGI:2157910]
6.68e-10	1.32679	0.478	0.383	2.85e-07	9	Pdia6	protein disulfide isomerase associated 6 [Source:MGI Symbol;Acc:MGI:1919103]
4.09e-128	1.32504	0.665	0.441	1.74e-125	9	Cst3	cystatin C [Source:MGI Symbol;Acc:MGI:102519]
0.000392	1.27096	0.456	0.406	1669052	9	Luc7l3	LUC7-like 3 (S. cerevisiae) [Source:MGI Symbol;Acc:MGI:1914934]
6.85e-69	1.25415	0.575	0.407	2.92e-66	9	Gpm6a	glycoprotein m6a [Source:MGI Symbol;Acc:MGI:107671]
4.96e-32	1.22803	0.544	0.393	2.11e-29	9	Slc22a17	solute carrier family 22 (organic cation transporter), member 17 [Source:MGI Symbol;Acc:MGI:1926225]
5.07e-09	1.18849	0.508	0.397	2.16e-06	9	Arxes2	adipocyte-related X-chromosome expressed sequence 2 [Source:MGI Symbol;Acc:MGI:1924226]
2.31e-91	1.18764	0.625	0.452	9.84e-89	9	Ttyh1	tweety family member 1 [Source:MGI Symbol;Acc:MGI:1889007]
8.43e-40	1.18248	0.554	0.411	3.59e-37	9	mt-Nd1	mitochondrially encoded NADH dehydrogenase 1 [Source:MGI Symbol;Acc:MGI:101787]
2.15e-36	1.16993	0.556	0.445	9.16e-34	9	Serpine2	serine (or cysteine) peptidase inhibitor, clade E, member 2 [Source:MGI Symbol;Acc:MGI:101780]
4.46e-108	1.14905	0.642	0.441	1.9e-105	9	Ntsr2	neurotensin receptor 2 [Source:MGI Symbol;Acc:MGI:108018]
3.18e-06	1.14891	0.473	0.401	0.00136	9	Aplp1	amyloid beta (A4) precursor-like protein 1 [Source:MGI Symbol;Acc:MGI:88046]
6.07e-06	1.14126	0.466	0.366	0.00259	9	Tmem176b	transmembrane protein 176B [Source:MGI Symbol;Acc:MGI:1916348]
9.54e-56	1.13757	0.595	0.445	4.06e-53	9	Lamp1	lysosomal-associated membrane protein 1 [Source:MGI Symbol;Acc:MGI:96745]
1.39e-27	1.1108	0.564	0.431	5.92e-25	9	Serinc1	serine incorporator 1 [Source:MGI Symbol;Acc:MGI:1926228]
3.76e-10	1.10834	0.48	0.378	1.6e-07	9	Reep5	receptor accessory protein 5 [Source:MGI Symbol;Acc:MGI:1270152]
1.12e-80	1.08983	0.636	0.473	4.78e-78	9	Plpp3	phospholipid phosphatase 3 [Source:MGI Symbol;Acc:MGI:1915166]
1.65e-27	1.02174	0.535	0.435	7.03e-25	9	Tspan3	tetraspanin 3 [Source:MGI Symbol;Acc:MGI:1928098]
1.11e-39	1.01914	0.557	0.425	4.72e-37	9	Tmem59	transmembrane protein 59 [Source:MGI Symbol;Acc:MGI:1929278]
5.47e-32	1.01866	0.549	0.425	2.33e-29	9	Grina	glutamate receptor, ionotropic, N-methyl D-aspartate-associated protein 1 (glutamate binding) [Source:MGI Symbol;Acc:MGI:1913418]
1.04e-33	1.01553	0.565	0.4	4.43e-31	9	Saraf	store-operated calcium entry-associated regulatory factor [Source:MGI Symbol;Acc:MGI:1915137]
2.15e-110	1.01482	0.659	0.473	9.14e-108	9	Atp1a2	ATPase, Na+/K+ transporting, alpha 2 polypeptide [Source:MGI Symbol;Acc:MGI:88106]
2.19e-27	1.01381	0.557	0.409	9.33e-25	9	Scg3	secretogranin III [Source:MGI Symbol;Acc:MGI:103032]
5.75e-06	1.0138	0.498	0.427	0.00245	9	Lamp2	lysosomal-associated membrane protein 2 [Source:MGI Symbol;Acc:MGI:96748]
4.5e-18	1.00555	0.486	0.376	1.92e-15	9	Atp6ap2	ATPase, H+ transporting, lysosomal accessory protein 2 [Source:MGI Symbol;Acc:MGI:1917745]
3.87e-07	0.994754	0.502	0.417	0.000165	9	Tspan7	tetraspanin 7 [Source:MGI Symbol;Acc:MGI:1298407]
7.34e-54	0.976001	0.588	0.449	3.13e-51	9	Slc6a1	solute carrier family 6 (neurotransmitter transporter, GABA), member 1 [Source:MGI Symbol;Acc:MGI:95627]
0.00129	0.966908	0.5	0.432	5493743	9	Mat2a	methionine adenosyltransferase II, alpha [Source:MGI Symbol;Acc:MGI:2443731]
3.29e-25	0.96129	0.523	0.362	1.4e-22	9	Hsp90b1	heat shock protein 90, beta (Grp94), member 1 [Source:MGI Symbol;Acc:MGI:98817]
4.94e-06	0.961137	0.35	0.386	0.0021	9	Vamp2	vesicle-associated membrane protein 2 [Source:MGI Symbol;Acc:MGI:1313277]
1.11e-07	0.957898	0.413	0.342	4.71e-05	9	Tmed9	transmembrane p24 trafficking protein 9 [Source:MGI Symbol;Acc:MGI:1914761]
1.61e-30	0.936752	0.526	0.36	6.84e-28	9	Cd9	CD9 antigen [Source:MGI Symbol;Acc:MGI:88348]
2.93e-18	0.924902	0.506	0.39	1.25e-15	9	Tmem176a	transmembrane protein 176A [Source:MGI Symbol;Acc:MGI:1913308]
1.92e-07	0.915442	0.468	0.386	8.2e-05	9	Pdia3	protein disulfide isomerase associated 3 [Source:MGI Symbol;Acc:MGI:95834]
1.51e-67	0.895446	0.587	0.413	6.44e-65	9	Tecr	trans-2,3-enoyl-CoA reductase [Source:MGI Symbol;Acc:MGI:1915408]
1.25e-22	0.890102	0.546	0.455	5.31e-20	9	Son	Son DNA binding protein [Source:MGI Symbol;Acc:MGI:98353]
1272816	0.865319	0.269	0.343	542219618	9	Nudcd3	NudC domain containing 3 [Source:MGI Symbol;Acc:MGI:2144158]
4.43e-53	0.863659	0.587	0.444	1.89e-50	9	Slc4a4	solute carrier family 4 (anion exchanger), member 4 [Source:MGI Symbol;Acc:MGI:1927555]
1e-08	0.852634	0.529	0.457	4.26e-06	9	Ncam1	neural cell adhesion molecule 1 [Source:MGI Symbol;Acc:MGI:97281]
3.11e-25	0.844344	0.546	0.446	1.32e-22	9	Ptprz1	protein tyrosine phosphatase, receptor type Z, polypeptide 1 [Source:MGI Symbol;Acc:MGI:97816]
5.22e-06	0.836893	0.516	0.469	0.00222	9	Nrxn1	neurexin I [Source:MGI Symbol;Acc:MGI:1096391]
2.27e-05	0.822399	0.415	0.324	0.00965	9	Rer1	retention in endoplasmic reticulum sorting receptor 1 [Source:MGI Symbol;Acc:MGI:1915080]
3.04e-05	0.803685	0.504	0.395	0.0129	9	Dad1	defender against cell death 1 [Source:MGI Symbol;Acc:MGI:101912]
8.84e-42	0.800028	0.557	0.396	3.76e-39	9	Ctsb	cathepsin B [Source:MGI Symbol;Acc:MGI:88561]
0.00304	0.780521	0.365	0.318	12970252	9	Tmed4	transmembrane p24 trafficking protein 4 [Source:MGI Symbol;Acc:MGI:1915070]
1.82e-33	0.776899	0.566	0.41	7.74e-31	9	Slc3a2	solute carrier family 3 (activators of dibasic and neutral amino acid transport), member 2 [Source:MGI Symbol;Acc:MGI:96955]
2.85e-08	0.767443	0.488	0.431	1.21e-05	9	Ddx5	DEAD box helicase 5 [Source:MGI Symbol;Acc:MGI:105037]
2.19e-10	0.761029	0.46	0.354	9.33e-08	9	Erp29	endoplasmic reticulum protein 29 [Source:MGI Symbol;Acc:MGI:1914647]
3.22e-12	0.759625	0.504	0.409	1.37e-09	9	Tmbim6	transmembrane BAX inhibitor motif containing 6 [Source:MGI Symbol;Acc:MGI:99682]
1.77e-14	0.753867	0.286	0.352	7.52e-12	9	Pja2	praja ring finger ubiquitin ligase 2 [Source:MGI Symbol;Acc:MGI:2159342]
7e-14	0.74509	0.518	0.445	2.98e-11	9	Acsl3	acyl-CoA synthetase long-chain family member 3 [Source:MGI Symbol;Acc:MGI:1921455]
9153462	0.738952	0.457	0.432	1	9	Srsf5	serine and arginine-rich splicing factor 5 [Source:MGI Symbol;Acc:MGI:98287]
0.00194	0.730563	0.461	0.384	8263411	9	Tmem208	transmembrane protein 208 [Source:MGI Symbol;Acc:MGI:1913570]
9.84e-15	0.727443	0.527	0.407	4.19e-12	9	Rtn3	reticulon 3 [Source:MGI Symbol;Acc:MGI:1339970]
1.54e-22	0.727022	0.548	0.448	6.57e-20	9	mt-Nd4	mitochondrially encoded NADH dehydrogenase 4 [Source:MGI Symbol;Acc:MGI:102498]
3.05e-99	0.720988	0.604	0.407	1.3e-96	9	mt-Cytb	mitochondrially encoded cytochrome b [Source:MGI Symbol;Acc:MGI:102501]
6.47e-16	0.708415	0.325	0.384	2.76e-13	9	Fkbp1a	FK506 binding protein 1a [Source:MGI Symbol;Acc:MGI:95541]
0.000317	0.707847	0.423	0.345	1350656	9	Ergic3	ERGIC and golgi 3 [Source:MGI Symbol;Acc:MGI:1913616]
8.71e-14	0.705355	0.508	0.413	3.71e-11	9	Npc2	NPC intracellular cholesterol transporter 2 [Source:MGI Symbol;Acc:MGI:1915213]
1.02e-08	0.700141	0.501	0.452	4.34e-06	9	Ntm	neurotrimin [Source:MGI Symbol;Acc:MGI:2446259]
0.000463	0.686274	0.454	0.396	1973118	9	Calr	calreticulin [Source:MGI Symbol;Acc:MGI:88252]
8.99e-15	0.685132	0.22	0.309	3.83e-12	9	Flywch1	FLYWCH-type zinc finger 1 [Source:MGI Symbol;Acc:MGI:2442638]
1.53e-17	0.676395	0.533	0.399	6.52e-15	9	Rabac1	Rab acceptor 1 (prenylated) [Source:MGI Symbol;Acc:MGI:1201692]
1.97e-07	0.672513	0.467	0.423	8.37e-05	9	Ttc14	tetratricopeptide repeat domain 14 [Source:MGI Symbol;Acc:MGI:1914370]
6.36e-07	0.671473	0.474	0.391	0.000271	9	Canx	calnexin [Source:MGI Symbol;Acc:MGI:88261]
3.38e-19	0.665102	0.556	0.435	1.44e-16	9	Rcn2	reticulocalbin 2 [Source:MGI Symbol;Acc:MGI:1349765]
5.32e-27	0.659381	0.551	0.457	2.27e-24	9	Atp6v0b	ATPase, H+ transporting, lysosomal V0 subunit B [Source:MGI Symbol;Acc:MGI:1890510]
4.53e-09	0.630094	0.507	0.439	1.93e-06	9	Snrnp70	small nuclear ribonucleoprotein 70 (U1) [Source:MGI Symbol;Acc:MGI:98341]
4.61e-05	0.626668	0.454	0.379	0.0196	9	Aplp2	amyloid beta (A4) precursor-like protein 2 [Source:MGI Symbol;Acc:MGI:88047]
1.15e-102	0.577436	0.621	0.422	4.91e-100	9	Psap	prosaposin [Source:MGI Symbol;Acc:MGI:97783]
2.46e-12	0.572134	0.547	0.433	1.05e-09	9	Syt11	synaptotagmin XI [Source:MGI Symbol;Acc:MGI:1859547]
9228875	0.571373	0.401	0.363	1	9	Npdc1	neural proliferation, differentiation and control 1 [Source:MGI Symbol;Acc:MGI:1099802]
4.43e-10	0.558881	0.495	0.397	1.89e-07	9	Sdf2	stromal cell derived factor 2 [Source:MGI Symbol;Acc:MGI:108019]
0.00578	0.543514	0.477	0.434	2461386	9	Tmem47	transmembrane protein 47 [Source:MGI Symbol;Acc:MGI:2177570]
509593	0.536248	0.46	0.403	1	9	Tkt	transketolase [Source:MGI Symbol;Acc:MGI:105992]
0.000192	0.530012	0.486	0.422	0.0818	9	Pnisr	PNN interacting serine/arginine-rich [Source:MGI Symbol;Acc:MGI:1913875]
584125	0.512495	0.36	0.394	1	9	Hmgn3	high mobility group nucleosomal binding domain 3 [Source:MGI Symbol;Acc:MGI:2138069]
8.36e-07	0.505209	0.513	0.426	0.000356	9	Hnrnpa2b1	heterogeneous nuclear ribonucleoprotein A2/B1 [Source:MGI Symbol;Acc:MGI:104819]
0.0076	0.50463	0.42	0.376	323932	9	Rnf13	ring finger protein 13 [Source:MGI Symbol;Acc:MGI:1346341]
1.43e-10	0.489434	0.509	0.4	6.09e-08	9	Tmed10	transmembrane p24 trafficking protein 10 [Source:MGI Symbol;Acc:MGI:1915831]
3.62e-12	0.488913	0.542	0.464	1.54e-09	9	Lsamp	limbic system-associated membrane protein [Source:MGI Symbol;Acc:MGI:1261760]
0.0247	0.486532	0.271	0.316	105313783	9	Ociad1	OCIA domain containing 1 [Source:MGI Symbol;Acc:MGI:1915345]
0.0001	0.483928	0.462	0.412	0.0426	9	Cadm1	cell adhesion molecule 1 [Source:MGI Symbol;Acc:MGI:1889272]
5.56e-14	0.477872	0.205	0.312	2.37e-11	9	Kifap3	kinesin-associated protein 3 [Source:MGI Symbol;Acc:MGI:107566]
0.032	0.456997	0.374	0.315	13635571	9	Atp6ap1	ATPase, H+ transporting, lysosomal accessory protein 1 [Source:MGI Symbol;Acc:MGI:109629]
0.000728	0.378532	0.357	0.416	3102425	9	Tagln3	transgelin 3 [Source:MGI Symbol;Acc:MGI:1926784]
0.0022	0.371078	0.46	0.392	9366929	9	Spcs2	signal peptidase complex subunit 2 homolog (S. cerevisiae) [Source:MGI Symbol;Acc:MGI:1913874]
7.63e-11	0.352072	0.477	0.38	3.25e-08	9	Rpn2	ribophorin II [Source:MGI Symbol;Acc:MGI:98085]
7.81e-07	0.33502	0.327	0.374	0.000333	9	Impact	impact, RWD domain protein [Source:MGI Symbol;Acc:MGI:1098233]
0.000145	0.303892	0.362	0.375	0.0618	9	Tubb5	tubulin, beta 5 class I [Source:MGI Symbol;Acc:MGI:107812]
0.00012	0.287459	0.272	0.319	0.0512	9	Tmem222	transmembrane protein 222 [Source:MGI Symbol;Acc:MGI:1098568]
1.1e-06	0.278036	0.346	0.405	0.00047	9	Abr	active BCR-related gene [Source:MGI Symbol;Acc:MGI:107771]
4.94e-09	0.264278	0.246	0.334	2.1e-06	9	Smarcc2	SWI/SNF related, matrix associated, actin dependent regulator of chromatin, subfamily c, member 2 [Source:MGI Symbol;Acc:MGI:1915344]
0.0357	0.250606	0.277	0.305	151993162	9	Pcmt1	protein-L-isoaspartate (D-aspartate) O-methyltransferase 1 [Source:MGI Symbol;Acc:MGI:97502]
0	11.284	0.969	0.362	0	10	Pcsk1n	proprotein convertase subtilisin/kexin type 1 inhibitor [Source:MGI Symbol;Acc:MGI:1353431]
7.35e-207	4.15498	0.858	0.365	3.13e-204	10	Rtn1	reticulon 1 [Source:MGI Symbol;Acc:MGI:1933947]
5.78e-193	7.82822	0.855	0.342	2.46e-190	10	App	amyloid beta (A4) precursor protein [Source:MGI Symbol;Acc:MGI:88059]
6.27e-191	8.85626	0.835	0.335	2.67e-188	10	Gaa	glucosidase, alpha, acid [Source:MGI Symbol;Acc:MGI:95609]
2.3e-106	1.07627	0.773	0.411	9.82e-104	10	mt-Cytb	mitochondrially encoded cytochrome b [Source:MGI Symbol;Acc:MGI:102501]
3.1e-91	5.53613	0.741	0.427	1.32e-88	10	Psap	prosaposin [Source:MGI Symbol;Acc:MGI:97783]
2.15e-77	5.89551	0.72	0.393	9.14e-75	10	Ndfip1	Nedd4 family interacting protein 1 [Source:MGI Symbol;Acc:MGI:1929601]
1.35e-73	3.28757	0.714	0.396	5.77e-71	10	Slc22a17	solute carrier family 22 (organic cation transporter), member 17 [Source:MGI Symbol;Acc:MGI:1926225]
7.17e-53	2.4559	0.678	0.344	3.05e-50	10	Ndn	necdin, MAGE family member [Source:MGI Symbol;Acc:MGI:97290]
3.35e-49	2.34585	0.669	0.434	1.43e-46	10	Itm2c	integral membrane protein 2C [Source:MGI Symbol;Acc:MGI:1927594]
1.28e-48	2.62931	0.68	0.401	5.46e-46	10	Aplp1	amyloid beta (A4) precursor-like protein 1 [Source:MGI Symbol;Acc:MGI:88046]
7.97e-47	1.36574	0.665	0.414	3.39e-44	10	mt-Nd1	mitochondrially encoded NADH dehydrogenase 1 [Source:MGI Symbol;Acc:MGI:101787]
1.48e-41	9.58076	0.563	0.296	6.29e-39	10	Timp2	tissue inhibitor of metalloproteinase 2 [Source:MGI Symbol;Acc:MGI:98753]
1.01e-39	4.7116	0.562	0.295	4.32e-37	10	Tmx4	thioredoxin-related transmembrane protein 4 [Source:MGI Symbol;Acc:MGI:106558]
2.49e-39	1.61473	0.654	0.418	1.06e-36	10	Tecr	trans-2,3-enoyl-CoA reductase [Source:MGI Symbol;Acc:MGI:1915408]
2.73e-39	13.3682	0.654	0.43	1.16e-36	10	Bsg	basigin [Source:MGI Symbol;Acc:MGI:88208]
1.01e-36	3.83734	0.633	0.377	4.3e-34	10	Atp6ap2	ATPase, H+ transporting, lysosomal accessory protein 2 [Source:MGI Symbol;Acc:MGI:1917745]
1.31e-35	1.22294	0.654	0.459	5.58e-33	10	Atp6v0b	ATPase, H+ transporting, lysosomal V0 subunit B [Source:MGI Symbol;Acc:MGI:1890510]
5.61e-35	4.4525	0.523	0.298	2.39e-32	10	Pld3	phospholipase D family, member 3 [Source:MGI Symbol;Acc:MGI:1333782]
6.74e-35	0.698522	0.651	0.388	2.87e-32	10	Ttc3	tetratricopeptide repeat domain 3 [Source:MGI Symbol;Acc:MGI:1276539]
1.69e-31	2.3468	0.613	0.357	7.18e-29	10	Gm1673	predicted gene 1673 [Source:MGI Symbol;Acc:MGI:2686519]
2.43e-31	1.77382	0.641	0.364	1.04e-28	10	Maged1	MAGE family member D1 [Source:MGI Symbol;Acc:MGI:1930187]
1.03e-29	1.43169	0.617	0.401	4.4e-27	10	Ctsb	cathepsin B [Source:MGI Symbol;Acc:MGI:88561]
5.35e-29	0.804206	0.635	0.45	2.28e-26	10	mt-Nd4	mitochondrially encoded NADH dehydrogenase 4 [Source:MGI Symbol;Acc:MGI:102498]
4.83e-28	1.29432	0.629	0.405	2.06e-25	10	Saraf	store-operated calcium entry-associated regulatory factor [Source:MGI Symbol;Acc:MGI:1915137]
1.33e-27	2.58448	0.56	0.329	5.68e-25	10	Tmem30a	transmembrane protein 30A [Source:MGI Symbol;Acc:MGI:106402]
5.45e-26	1.87191	0.602	0.434	2.32e-23	10	Serinc1	serine incorporator 1 [Source:MGI Symbol;Acc:MGI:1926228]
6.13e-22	1.38693	0.604	0.411	2.61e-19	10	Hspa5	heat shock protein 5 [Source:MGI Symbol;Acc:MGI:95835]
1.09e-21	3.31244	0.601	0.386	4.66e-19	10	Lrpap1	low density lipoprotein receptor-related protein associated protein 1 [Source:MGI Symbol;Acc:MGI:96829]
2.52e-20	0.873501	0.617	0.434	1.07e-17	10	Ndufa4	Ndufa4, mitochondrial complex associated [Source:MGI Symbol;Acc:MGI:107686]
1.52e-19	0.869207	0.584	0.398	6.49e-17	10	Dad1	defender against cell death 1 [Source:MGI Symbol;Acc:MGI:101912]
3.94e-19	2.86299	0.528	0.315	1.68e-16	10	Atp6ap1	ATPase, H+ transporting, lysosomal accessory protein 1 [Source:MGI Symbol;Acc:MGI:109629]
4e-19	1.52192	0.554	0.367	1.7e-16	10	Hsp90b1	heat shock protein 90, beta (Grp94), member 1 [Source:MGI Symbol;Acc:MGI:98817]
7.59e-19	1.52083	0.604	0.392	3.23e-16	10	Canx	calnexin [Source:MGI Symbol;Acc:MGI:88261]
8.04e-19	3.27784	0.58	0.422	3.43e-16	10	Gnas	GNAS (guanine nucleotide binding protein, alpha stimulating) complex locus [Source:MGI Symbol;Acc:MGI:95777]
1.79e-18	2.02878	0.602	0.426	7.63e-16	10	Gabbr1	gamma-aminobutyric acid (GABA) B receptor, 1 [Source:MGI Symbol;Acc:MGI:1860139]
4.92e-18	2.22937	0.593	0.383	2.09e-15	10	Fkbp2	FK506 binding protein 2 [Source:MGI Symbol;Acc:MGI:95542]
5.3e-18	1.6657	0.589	0.401	2.26e-15	10	Ndufc2	NADH:ubiquinone oxidoreductase subunit C2 [Source:MGI Symbol;Acc:MGI:1344370]
2.17e-17	1.90047	0.575	0.356	9.26e-15	10	Erp29	endoplasmic reticulum protein 29 [Source:MGI Symbol;Acc:MGI:1914647]
3.19e-17	0.978507	0.562	0.413	1.36e-14	10	Gpm6a	glycoprotein m6a [Source:MGI Symbol;Acc:MGI:107671]
4.75e-17	2.38007	0.534	0.362	2.02e-14	10	Npdc1	neural proliferation, differentiation and control 1 [Source:MGI Symbol;Acc:MGI:1099802]
5.12e-16	1.1878	0.553	0.41	2.18e-13	10	Rtn3	reticulon 3 [Source:MGI Symbol;Acc:MGI:1339970]
7.69e-16	0.736989	0.583	0.423	3.28e-13	10	Itm2b	integral membrane protein 2B [Source:MGI Symbol;Acc:MGI:1309517]
7.76e-16	1.29548	0.584	0.419	3.31e-13	10	Tspan7	tetraspanin 7 [Source:MGI Symbol;Acc:MGI:1298407]
8.56e-15	1.19156	0.562	0.403	3.65e-12	10	Rabac1	Rab acceptor 1 (prenylated) [Source:MGI Symbol;Acc:MGI:1201692]
8.84e-15	1.18158	0.575	0.384	3.77e-12	10	Ndufb5	NADH:ubiquinone oxidoreductase subunit B5 [Source:MGI Symbol;Acc:MGI:1913296]
5.63e-13	2.68585	0.578	0.391	2.4e-10	10	Nptn	neuroplastin [Source:MGI Symbol;Acc:MGI:108077]
2.42e-12	0.262577	0.584	0.388	1.03e-09	10	Snrpn	small nuclear ribonucleoprotein N [Source:MGI Symbol;Acc:MGI:98347]
2.47e-11	1.65626	0.548	0.385	1.05e-08	10	Pdia6	protein disulfide isomerase associated 6 [Source:MGI Symbol;Acc:MGI:1919103]
3.17e-11	0.957408	0.537	0.416	1.35e-08	10	Arl6ip1	ADP-ribosylation factor-like 6 interacting protein 1 [Source:MGI Symbol;Acc:MGI:1858943]
1.22e-10	1.15122	0.507	0.347	5.18e-08	10	Ergic3	ERGIC and golgi 3 [Source:MGI Symbol;Acc:MGI:1913616]
6.02e-10	0.78165	0.206	0.332	2.56e-07	10	Smarcc2	SWI/SNF related, matrix associated, actin dependent regulator of chromatin, subfamily c, member 2 [Source:MGI Symbol;Acc:MGI:1915344]
8.35e-10	0.755731	0.548	0.415	3.56e-07	10	Ubb	ubiquitin B [Source:MGI Symbol;Acc:MGI:98888]
1.48e-09	0.943034	0.58	0.42	6.32e-07	10	Cisd1	CDGSH iron sulfur domain 1 [Source:MGI Symbol;Acc:MGI:1261855]
1.82e-09	2.19022	0.438	0.292	7.76e-07	10	Tusc3	tumor suppressor candidate 3 [Source:MGI Symbol;Acc:MGI:1933134]
3.99e-08	1.16007	0.343	0.407	1.7e-05	10	Pygb	brain glycogen phosphorylase [Source:MGI Symbol;Acc:MGI:97828]
1.76e-07	0.737874	0.499	0.37	7.49e-05	10	Ndufa3	NADH:ubiquinone oxidoreductase subunit A3 [Source:MGI Symbol;Acc:MGI:1913341]
3.49e-07	1.96791	0.519	0.381	0.000149	10	Aplp2	amyloid beta (A4) precursor-like protein 2 [Source:MGI Symbol;Acc:MGI:88047]
4.18e-07	2.99437	0.554	0.364	0.000178	10	Mtch1	mitochondrial carrier 1 [Source:MGI Symbol;Acc:MGI:1929261]
6.4e-07	0.268728	0.352	0.431	0.000272	10	Sat1	spermidine/spermine N1-acetyl transferase 1 [Source:MGI Symbol;Acc:MGI:98233]
9.78e-06	0.83792	0.514	0.388	0.00417	10	Pdia3	protein disulfide isomerase associated 3 [Source:MGI Symbol;Acc:MGI:95834]
1.44e-05	0.527396	0.531	0.402	0.00615	10	Atpif1	ATPase inhibitory factor 1 [Source:MGI Symbol;Acc:MGI:1196457]
2.3e-05	0.338809	0.274	0.341	0.00979	10	St13	suppression of tumorigenicity 13 [Source:MGI Symbol;Acc:MGI:1917606]
2.37e-05	2.44058	0.338	0.387	0.0101	10	Kif1a	kinesin family member 1A [Source:MGI Symbol;Acc:MGI:108391]
2.96e-05	0.954568	0.472	0.373	0.0126	10	Rtn4	reticulon 4 [Source:MGI Symbol;Acc:MGI:1915835]
3.32e-05	0.721395	0.526	0.396	0.0141	10	Spcs1	signal peptidase complex subunit 1 homolog (S. cerevisiae) [Source:MGI Symbol;Acc:MGI:1916269]
7.33e-05	1.57345	0.547	0.429	0.0312	10	Tmem59	transmembrane protein 59 [Source:MGI Symbol;Acc:MGI:1929278]
0.00011	2.68881	0.429	0.326	0.0467	10	Itfg1	integrin alpha FG-GAP repeat containing 1 [Source:MGI Symbol;Acc:MGI:106419]
0.000147	0.93172	0.529	0.38	0.0624	10	Reep5	receptor accessory protein 5 [Source:MGI Symbol;Acc:MGI:1270152]
0.000177	1.41885	0.41	0.312	0.0753	10	Ociad1	OCIA domain containing 1 [Source:MGI Symbol;Acc:MGI:1915345]
0.000254	0.261519	0.548	0.413	1081221	10	Rplp2	ribosomal protein, large P2 [Source:MGI Symbol;Acc:MGI:1914436]
0.000345	0.978809	0.532	0.397	1470742	10	Calr	calreticulin [Source:MGI Symbol;Acc:MGI:88252]
0.0006	1.01466	0.489	0.401	2557911	10	Arxes2	adipocyte-related X-chromosome expressed sequence 2 [Source:MGI Symbol;Acc:MGI:1924226]
0.000647	0.374897	0.307	0.389	2757787	10	Gdi2	guanosine diphosphate (GDP) dissociation inhibitor 2 [Source:MGI Symbol;Acc:MGI:99845]
0.000948	0.379766	0.323	0.382	403927	10	Ktn1	kinectin 1 [Source:MGI Symbol;Acc:MGI:109153]
0.00102	0.250102	0.31	0.369	4328005	10	Rraga	Ras-related GTP binding A [Source:MGI Symbol;Acc:MGI:1915691]
0.00156	0.483532	0.232	0.338	6659315	10	Pik3r1	phosphoinositide-3-kinase regulatory subunit 1 [Source:MGI Symbol;Acc:MGI:97583]
0.00159	1.03173	0.203	0.308	6764277	10	Kifap3	kinesin-associated protein 3 [Source:MGI Symbol;Acc:MGI:107566]
0.00208	0.438284	0.277	0.328	8868319	10	Ube2d2a	ubiquitin-conjugating enzyme E2D 2A [Source:MGI Symbol;Acc:MGI:1930715]
0.00257	0.32302	0.255	0.354	10932355	10	Ptpra	protein tyrosine phosphatase, receptor type, A [Source:MGI Symbol;Acc:MGI:97808]
0.00364	0.476237	0.267	0.319	15516589	10	Cct8	chaperonin containing Tcp1, subunit 8 (theta) [Source:MGI Symbol;Acc:MGI:107183]
0.00595	0.649672	0.529	0.429	2532633	10	Grina	glutamate receptor, ionotropic, N-methyl D-aspartate-associated protein 1 (glutamate binding) [Source:MGI Symbol;Acc:MGI:1913418]
0.0201	0.799903	0.51	0.393	85696927	10	Spcs2	signal peptidase complex subunit 2 homolog (S. cerevisiae) [Source:MGI Symbol;Acc:MGI:1913874]
0.0233	1.50547	0.422	0.325	9905259	10	Atp6v0e2	ATPase, H+ transporting, lysosomal V0 subunit E2 [Source:MGI Symbol;Acc:MGI:1923502]
0.0539	2.29314	0.402	0.338	22959552	10	Tgoln1	trans-golgi network protein [Source:MGI Symbol;Acc:MGI:105080]
0.0668	0.308665	0.328	0.373	284637652	10	Ddx24	DEAD box helicase 24 [Source:MGI Symbol;Acc:MGI:1351337]
0.0698	0.336463	0.471	0.378	29753896	10	Rps18	ribosomal protein S18 [Source:MGI Symbol;Acc:MGI:98146]
0.0902	0.570869	0.39	0.379	38414891	10	Zcchc18	zinc finger, CCHC domain containing 18 [Source:MGI Symbol;Acc:MGI:1914245]
0.0976	0.967316	0.426	0.345	415723104	10	Tmed9	transmembrane p24 trafficking protein 9 [Source:MGI Symbol;Acc:MGI:1914761]
1082635	0.542835	0.285	0.325	461202389	10	Hmgcs1	3-hydroxy-3-methylglutaryl-Coenzyme A synthase 1 [Source:MGI Symbol;Acc:MGI:107592]
1105143	0.914338	0.495	0.41	470790957	10	Ctsd	cathepsin D [Source:MGI Symbol;Acc:MGI:88562]
1213733	0.407653	0.306	0.351	51705013	10	Syn2	synapsin II [Source:MGI Symbol;Acc:MGI:103020]
2452	0.669327	0.505	0.4	1	10	Tomm20	translocase of outer mitochondrial membrane 20 [Source:MGI Symbol;Acc:MGI:1915202]
2628345	0.34563	0.504	0.407	1	10	BC031181	cDNA sequence BC031181 [Source:MGI Symbol;Acc:MGI:3039614]
2837148	1.15347	0.268	0.346	1	10	Zranb2	zinc finger, RAN-binding domain containing 2 [Source:MGI Symbol;Acc:MGI:1858211]
5342258	0.992246	0.483	0.392	1	10	Hsp90aa1	heat shock protein 90, alpha (cytosolic), class A member 1 [Source:MGI Symbol;Acc:MGI:96250]
9539509	10.627	0.347	0.399	1	10	Ube2d3	ubiquitin-conjugating enzyme E2D 3 [Source:MGI Symbol;Acc:MGI:1913355]
4.57e-291	9.09916	0.922	0.268	1.95e-288	11	Meg3	maternally expressed 3 [Source:MGI Symbol;Acc:MGI:1202886]
6.51e-250	9.37496	0.878	0.248	2.77e-247	11	Snhg11	small nucleolar RNA host gene 11 [Source:MGI Symbol;Acc:MGI:2441845]
2.43e-101	1.4367	0.792	0.365	1.04e-98	11	Pcsk1n	proprotein convertase subtilisin/kexin type 1 inhibitor [Source:MGI Symbol;Acc:MGI:1353431]
1.93e-60	0.748448	0.701	0.368	8.24e-58	11	Rtn1	reticulon 1 [Source:MGI Symbol;Acc:MGI:1933947]
5.07e-53	13.6644	0.674	0.347	2.16e-50	11	Pgrmc1	progesterone receptor membrane component 1 [Source:MGI Symbol;Acc:MGI:1858305]
1.47e-51	2.98784	0.689	0.345	6.27e-49	11	Ndn	necdin, MAGE family member [Source:MGI Symbol;Acc:MGI:97290]
2.3e-49	1.55903	0.693	0.364	9.78e-47	11	Maged1	MAGE family member D1 [Source:MGI Symbol;Acc:MGI:1930187]
6.1e-46	0.992832	0.707	0.409	2.6e-43	11	Ahi1	Abelson helper integration site 1 [Source:MGI Symbol;Acc:MGI:87971]
5.4e-34	1.03935	0.674	0.364	2.3e-31	11	Mtch1	mitochondrial carrier 1 [Source:MGI Symbol;Acc:MGI:1929261]
1.11e-31	1.98502	0.589	0.296	4.74e-29	11	Timp2	tissue inhibitor of metalloproteinase 2 [Source:MGI Symbol;Acc:MGI:98753]
6.08e-31	0.462699	0.606	0.32	2.59e-28	11	Gprasp1	G protein-coupled receptor associated sorting protein 1 [Source:MGI Symbol;Acc:MGI:1917418]
8.18e-30	0.531997	0.653	0.388	3.49e-27	11	Snrpn	small nuclear ribonucleoprotein N [Source:MGI Symbol;Acc:MGI:98347]
3.69e-26	5.09257	0.604	0.382	1.57e-23	11	Ube3a	ubiquitin protein ligase E3A [Source:MGI Symbol;Acc:MGI:105098]
3.94e-26	0.400138	0.649	0.414	1.68e-23	11	mt-Cytb	mitochondrially encoded cytochrome b [Source:MGI Symbol;Acc:MGI:102501]
1.67e-25	2.11561	0.618	0.395	7.12e-23	11	Ndfip1	Nedd4 family interacting protein 1 [Source:MGI Symbol;Acc:MGI:1929601]
1.98e-22	5.2591	0.58	0.368	8.43e-20	11	Mycbp2	MYC binding protein 2, E3 ubiquitin protein ligase [Source:MGI Symbol;Acc:MGI:2179432]
9.81e-20	0.509739	0.658	0.418	4.18e-17	11	Rpl26	ribosomal protein L26 [Source:MGI Symbol;Acc:MGI:106022]
1.35e-18	0.887747	0.601	0.358	5.77e-16	11	Gm1673	predicted gene 1673 [Source:MGI Symbol;Acc:MGI:2686519]
1.64e-15	0.290776	0.602	0.383	6.97e-13	11	Fkbp2	FK506 binding protein 2 [Source:MGI Symbol;Acc:MGI:95542]
9.58e-14	1.11131	0.601	0.413	4.08e-11	11	Rplp1	ribosomal protein, large, P1 [Source:MGI Symbol;Acc:MGI:1927099]
2.32e-13	0.4256	0.552	0.362	9.89e-11	11	Npdc1	neural proliferation, differentiation and control 1 [Source:MGI Symbol;Acc:MGI:1099802]
3.65e-13	3.34726	0.571	0.377	1.55e-10	11	Zcchc18	zinc finger, CCHC domain containing 18 [Source:MGI Symbol;Acc:MGI:1914245]
1.14e-12	0.294377	0.582	0.401	4.87e-10	11	Rps3	ribosomal protein S3 [Source:MGI Symbol;Acc:MGI:1350917]
1.22e-12	0.548688	0.536	0.347	5.22e-10	11	Pja2	praja ring finger ubiquitin ligase 2 [Source:MGI Symbol;Acc:MGI:2159342]
1.23e-12	1.40308	0.571	0.423	5.22e-10	11	Gnas	GNAS (guanine nucleotide binding protein, alpha stimulating) complex locus [Source:MGI Symbol;Acc:MGI:95777]
1.58e-12	1.14935	0.575	0.406	6.72e-10	11	Luc7l3	LUC7-like 3 (S. cerevisiae) [Source:MGI Symbol;Acc:MGI:1914934]
4.16e-12	0.395646	0.503	0.301	1.77e-09	11	Pcmt1	protein-L-isoaspartate (D-aspartate) O-methyltransferase 1 [Source:MGI Symbol;Acc:MGI:97502]
4.29e-12	1.24687	0.562	0.398	1.83e-09	11	Slc22a17	solute carrier family 22 (organic cation transporter), member 17 [Source:MGI Symbol;Acc:MGI:1926225]
5.44e-12	0.522344	0.592	0.402	2.32e-09	11	Atpif1	ATPase inhibitory factor 1 [Source:MGI Symbol;Acc:MGI:1196457]
4.89e-10	0.506864	0.519	0.342	2.09e-07	11	Snap47	synaptosomal-associated protein, 47 [Source:MGI Symbol;Acc:MGI:1915076]
7.39e-10	3.0767	0.481	0.299	3.15e-07	11	Pld3	phospholipase D family, member 3 [Source:MGI Symbol;Acc:MGI:1333782]
1.04e-09	0.749985	0.495	0.349	4.41e-07	11	Syn2	synapsin II [Source:MGI Symbol;Acc:MGI:103020]
1.16e-09	1.13221	0.562	0.373	4.95e-07	11	Tubb5	tubulin, beta 5 class I [Source:MGI Symbol;Acc:MGI:107812]
1.24e-09	0.289245	0.595	0.392	5.29e-07	11	Ndufa11	NADH:ubiquinone oxidoreductase subunit A11 [Source:MGI Symbol;Acc:MGI:1917125]
1.67e-09	0.684139	0.578	0.413	7.1e-07	11	Srrm2	serine/arginine repetitive matrix 2 [Source:MGI Symbol;Acc:MGI:1923206]
2.07e-09	0.662008	0.583	0.42	8.81e-07	11	Gria2	glutamate receptor, ionotropic, AMPA2 (alpha 2) [Source:MGI Symbol;Acc:MGI:95809]
8.37e-09	0.367711	0.561	0.377	3.56e-06	11	Rps18	ribosomal protein S18 [Source:MGI Symbol;Acc:MGI:98146]
1.87e-08	1.18126	0.575	0.414	7.95e-06	11	Rpl32	ribosomal protein L32 [Source:MGI Symbol;Acc:MGI:98038]
5.62e-08	0.52164	0.549	0.385	2.4e-05	11	Dpysl2	dihydropyrimidinase-like 2 [Source:MGI Symbol;Acc:MGI:1349763]
1.22e-07	0.611569	0.547	0.402	5.19e-05	11	Mrfap1	Morf4 family associated protein 1 [Source:MGI Symbol;Acc:MGI:1914818]
4.2e-07	0.354111	0.488	0.33	0.000179	11	Tmem30a	transmembrane protein 30A [Source:MGI Symbol;Acc:MGI:106402]
5.04e-07	0.465036	0.575	0.413	0.000215	11	Rplp2	ribosomal protein, large P2 [Source:MGI Symbol;Acc:MGI:1914436]
9.8e-07	0.490076	0.55	0.431	0.000417	11	Fus	fused in sarcoma [Source:MGI Symbol;Acc:MGI:1353633]
2.25e-06	0.612535	0.54	0.384	0.00096	11	Ptov1	prostate tumor over expressed gene 1 [Source:MGI Symbol;Acc:MGI:1933946]
4.46e-06	1.11292	0.53	0.385	0.0019	11	Ndufb5	NADH:ubiquinone oxidoreductase subunit B5 [Source:MGI Symbol;Acc:MGI:1913296]
7.11e-06	0.253318	0.517	0.374	0.00303	11	Thra	thyroid hormone receptor alpha [Source:MGI Symbol;Acc:MGI:98742]
1.29e-05	0.929331	0.528	0.394	0.00551	11	Canx	calnexin [Source:MGI Symbol;Acc:MGI:88261]
2.26e-05	2.6239	0.458	0.306	0.00962	11	Morf4l2	mortality factor 4 like 2 [Source:MGI Symbol;Acc:MGI:1927167]
3.14e-05	0.603205	0.483	0.362	0.0134	11	Hnrnpdl	heterogeneous nuclear ribonucleoprotein D-like [Source:MGI Symbol;Acc:MGI:1355299]
4.02e-05	0.432888	0.438	0.329	0.0171	11	Smarcc2	SWI/SNF related, matrix associated, actin dependent regulator of chromatin, subfamily c, member 2 [Source:MGI Symbol;Acc:MGI:1915344]
4.3e-05	0.582847	0.498	0.382	0.0183	11	Ywhaq	tyrosine 3-monooxygenase/tryptophan 5-monooxygenase activation protein theta [Source:MGI Symbol;Acc:MGI:891963]
4.43e-05	0.549595	0.486	0.4	0.0189	11	Rbm25	RNA binding motif protein 25 [Source:MGI Symbol;Acc:MGI:1914289]
4.47e-05	0.316479	0.502	0.373	0.019	11	Rtn4	reticulon 4 [Source:MGI Symbol;Acc:MGI:1915835]
0.000454	0.47439	0.486	0.383	1932363	11	Vamp2	vesicle-associated membrane protein 2 [Source:MGI Symbol;Acc:MGI:1313277]
0.000544	0.331833	0.436	0.326	2318274	11	Itfg1	integrin alpha FG-GAP repeat containing 1 [Source:MGI Symbol;Acc:MGI:106419]
0.00178	0.472202	0.536	0.402	7567165	11	Prkar1a	protein kinase, cAMP dependent regulatory, type I, alpha [Source:MGI Symbol;Acc:MGI:104878]
0.00189	1.03503	0.424	0.315	8041894	11	Tmem222	transmembrane protein 222 [Source:MGI Symbol;Acc:MGI:1098568]
0.00464	1.52801	0.373	0.268	19769819	11	Psmd2	proteasome (prosome, macropain) 26S subunit, non-ATPase, 2 [Source:MGI Symbol;Acc:MGI:1096584]
0.00621	0.389742	0.505	0.385	26447507	11	Pea15a	proliferation and apoptosis adaptor protein 15A [Source:MGI Symbol;Acc:MGI:104799]
0.00964	0.487054	0.517	0.412	41048513	11	Tagln3	transgelin 3 [Source:MGI Symbol;Acc:MGI:1926784]
0.0104	0.295163	0.469	0.397	44421866	11	Hsbp1	heat shock factor binding protein 1 [Source:MGI Symbol;Acc:MGI:1915446]
0.0159	0.659831	0.483	0.37	6761065	11	Ndufa3	NADH:ubiquinone oxidoreductase subunit A3 [Source:MGI Symbol;Acc:MGI:1913341]
0.0195	0.808101	0.523	0.403	83104958	11	Aplp1	amyloid beta (A4) precursor-like protein 1 [Source:MGI Symbol;Acc:MGI:88046]
0.0341	0.361734	0.505	0.382	145053148	11	Skp1a	NA
0.0382	0.259323	0.505	0.401	162643767	11	Tomm20	translocase of outer mitochondrial membrane 20 [Source:MGI Symbol;Acc:MGI:1915202]
0.0392	0.385129	0.516	0.41	167150641	11	Gabarapl2	gamma-aminobutyric acid (GABA) A receptor-associated protein-like 2 [Source:MGI Symbol;Acc:MGI:1890602]
0.0539	0.568771	0.512	0.432	229645617	11	Calm1	calmodulin 1 [Source:MGI Symbol;Acc:MGI:88251]
0.0647	2.72158	0.458	0.344	275604865	11	Zranb2	zinc finger, RAN-binding domain containing 2 [Source:MGI Symbol;Acc:MGI:1858211]
1368419	1.6879	0.517	0.461	582946607	11	Atp6v0b	ATPase, H+ transporting, lysosomal V0 subunit B [Source:MGI Symbol;Acc:MGI:1890510]
1523838	0.346181	0.536	0.438	649155171	11	Eif4a2	eukaryotic translation initiation factor 4A2 [Source:MGI Symbol;Acc:MGI:106906]
2000421	0.934549	0.503	0.409	852179233	11	Npm1	nucleophosmin 1 [Source:MGI Symbol;Acc:MGI:106184]
6.99e-11	0.956472	0.556	0.397	2.98e-08	12	Fth1	ferritin heavy polypeptide 1 [Source:MGI Symbol;Acc:MGI:95588]
4.67e-05	0.266706	0.572	0.451	0.0199	12	mt-Nd4	mitochondrially encoded NADH dehydrogenase 4 [Source:MGI Symbol;Acc:MGI:102498]
0.00669	0.569553	0.515	0.402	28498465	12	Cnp	2',3'-cyclic nucleotide 3' phosphodiesterase [Source:MGI Symbol;Acc:MGI:88437]
0.0487	0.465024	0.411	0.317	207328142	12	Atp6ap1	ATPase, H+ transporting, lysosomal accessory protein 1 [Source:MGI Symbol;Acc:MGI:109629]
340546	1.38969	0.469	0.386	1	12	Dpysl2	dihydropyrimidinase-like 2 [Source:MGI Symbol;Acc:MGI:1349763]
3486971	0.351709	0.485	0.412	1	12	Ftl1	ferritin light polypeptide 1 [Source:MGI Symbol;Acc:MGI:95589]
3979309	0.324337	0.469	0.383	1	12	Dnaja1	DnaJ heat shock protein family (Hsp40) member A1 [Source:MGI Symbol;Acc:MGI:1270129]
5524858	0.965702	0.42	0.334	1	12	Atp6v1a	ATPase, H+ transporting, lysosomal V1 subunit A [Source:MGI Symbol;Acc:MGI:1201780]
8179466	0.998426	0.469	0.392	1	12	Hmgn3	high mobility group nucleosomal binding domain 3 [Source:MGI Symbol;Acc:MGI:2138069]
0.00497	1.11619	0.27	0.325	21176655	16	Hmgcs1	3-hydroxy-3-methylglutaryl-Coenzyme A synthase 1 [Source:MGI Symbol;Acc:MGI:107592]
0.0345	1.27912	0.312	0.382	147017749	16	Psma2	proteasome subunit alpha 2 [Source:MGI Symbol;Acc:MGI:104885]
0.0855	0.46451	0.603	0.481	364361157	16	Atp1a2	ATPase, Na+/K+ transporting, alpha 2 polypeptide [Source:MGI Symbol;Acc:MGI:88106]
1482121	0.387123	0.296	0.379	631383699	16	Rps18	ribosomal protein S18 [Source:MGI Symbol;Acc:MGI:98146]
3653675	1.5815	0.556	0.461	1	16	Atp6v0b	ATPase, H+ transporting, lysosomal V0 subunit B [Source:MGI Symbol;Acc:MGI:1890510]
385833	0.400086	0.328	0.415	1	16	Rplp2	ribosomal protein, large P2 [Source:MGI Symbol;Acc:MGI:1914436]
4669298	2.55921	0.296	0.389	1	16	Ubl5	ubiquitin-like 5 [Source:MGI Symbol;Acc:MGI:1913427]
5035006	0.758827	0.36	0.383	1	16	Ncl	nucleolin [Source:MGI Symbol;Acc:MGI:97286]
6978751	0.71847	0.349	0.37	1	16	Hsp90b1	heat shock protein 90, beta (Grp94), member 1 [Source:MGI Symbol;Acc:MGI:98817]
7956633	3.44869	0.307	0.346	1	16	Dpm3	dolichyl-phosphate mannosyltransferase polypeptide 3 [Source:MGI Symbol;Acc:MGI:1915813]
8196416	0.317136	0.365	0.383	1	16	Ywhaq	tyrosine 3-monooxygenase/tryptophan 5-monooxygenase activation protein theta [Source:MGI Symbol;Acc:MGI:891963]

## Sheet: DEGene_Set_Enrichment_Analysis
cluster	term_name	precision	recall	p_value	query_size	intersection_size	term_size	term_id	source	effective_domain_size	source_order
1	regulation of RNA splicing	0.155172	0.0473684	4.7987e-07	58	9	190	GO:0043484	GO:BP	27205	11320
1	regulation of mRNA splicing, via spliceosome	0.12069	0.0588235	1.18672e-05	58	7	119	GO:0048024	GO:BP	27205	13209
1	regulation of mRNA processing	0.12069	0.0466667	5.92122e-05	58	7	150	GO:0050684	GO:BP	27205	13959
1	localization	0.517241	0.00546349	0.000171286	58	30	5491	GO:0051179	GO:BP	27205	14323
1	transport	0.465517	0.00578902	0.000372025	58	27	4664	GO:0006810	GO:BP	27205	2546
1	establishment of localization	0.465517	0.00559818	0.000749027	58	27	4823	GO:0051234	GO:BP	27205	14353
1	cell-cell signaling	0.275862	0.00915332	0.000883016	58	16	1748	GO:0007267	GO:BP	27205	2864
1	cognition	0.137931	0.0222222	0.00173502	58	8	360	GO:0050890	GO:BP	27205	14087
1	regulation of metabolic process	0.568966	0.0045442	0.0021326	58	33	7262	GO:0019222	GO:BP	27205	5900
1	positive regulation of metabolic process	0.396552	0.00583608	0.00438934	58	23	3941	GO:0009893	GO:BP	27205	3831
1	positive regulation of biological process	0.534483	0.00460487	0.00475485	58	31	6732	GO:0048518	GO:BP	27205	13539
1	negative regulation of cellular process	0.448276	0.00522613	0.00549773	58	26	4975	GO:0048523	GO:BP	27205	13544
1	regulation of localization	0.293103	0.00741387	0.00659077	58	17	2293	GO:0032879	GO:BP	27205	8303
1	regulation of mRNA metabolic process	0.12069	0.0227273	0.00756296	58	7	308	GO:1903311	GO:BP	27205	23991
1	behavior	0.172414	0.0131579	0.00784842	58	10	760	GO:0007610	GO:BP	27205	3139
1	cellular localization	0.362069	0.00601547	0.00927125	58	21	3491	GO:0051641	GO:BP	27205	14642
1	learning or memory	0.12069	0.0216049	0.0105367	58	7	324	GO:0007611	GO:BP	27205	3140
1	regulation of cellular metabolic process	0.465517	0.00490018	0.011056	58	27	5510	GO:0031323	GO:BP	27205	7510
1	regulation of primary metabolic process	0.482759	0.00471937	0.0138071	58	28	5933	GO:0080090	GO:BP	27205	18790
1	regulation of membrane potential	0.137931	0.0167015	0.014294	58	8	479	GO:0042391	GO:BP	27205	10714
1	regulation of carbohydrate catabolic process	0.0689655	0.0655738	0.0164136	58	4	61	GO:0043470	GO:BP	27205	11308
1	positive regulation of cellular process	0.482759	0.004669	0.0171344	58	28	5997	GO:0048522	GO:BP	27205	13543
1	regulation of macromolecule metabolic process	0.517241	0.00443459	0.0182908	58	30	6765	GO:0060255	GO:BP	27205	15305
1	positive regulation of gene expression	0.206897	0.00965406	0.018441	58	12	1243	GO:0010628	GO:BP	27205	4370
1	positive regulation of cellular component organization	0.206897	0.00963082	0.0188933	58	12	1246	GO:0051130	GO:BP	27205	14276
1	response to organonitrogen compound	0.206897	0.00951626	0.0213043	58	12	1261	GO:0010243	GO:BP	27205	4100
1	regulation of ventricular cardiac muscle cell membrane repolarization	0.0517241	0.136364	0.0254803	58	3	22	GO:0060307	GO:BP	27205	15353
1	organic substance transport	0.310345	0.00634473	0.0277219	58	18	2837	GO:0071702	GO:BP	27205	17820
1	trans-synaptic signaling	0.172414	0.0110865	0.0348525	58	10	902	GO:0099537	GO:BP	27205	20178
1	ventricular cardiac muscle cell membrane repolarization	0.0517241	0.12	0.0378824	58	3	25	GO:0099625	GO:BP	27205	20232
1	regulation of cardiac muscle cell membrane repolarization	0.0517241	0.115385	0.0427588	58	3	26	GO:0099623	GO:BP	27205	20230
1	nitrogen compound transport	0.258621	0.00714967	0.0442431	58	15	2098	GO:0071705	GO:BP	27205	17823
1	response to nitrogen compound	0.206897	0.00883652	0.0445105	58	12	1358	GO:1901698	GO:BP	27205	22659
1	synapse	0.40678	0.0143113	4.77519e-12	59	24	1677	GO:0045202	GO:CC	27262	2147
1	postsynapse	0.305085	0.0207852	4.23206e-11	59	18	866	GO:0098794	GO:CC	27262	3266
1	cell junction	0.423729	0.010898	5.14562e-10	59	25	2294	GO:0030054	GO:CC	27262	871
1	neuron to neuron synapse	0.220339	0.0268595	6.96474e-09	59	13	484	GO:0098984	GO:CC	27262	3331
1	asymmetric synapse	0.20339	0.0268456	4.43603e-08	59	12	447	GO:0032279	GO:CC	27262	1285
1	postsynaptic density	0.186441	0.025641	4.46787e-07	59	11	429	GO:0014069	GO:CC	27262	696
1	postsynaptic specialization	0.186441	0.0234043	1.15353e-06	59	11	470	GO:0099572	GO:CC	27262	3384
1	cytoplasm	0.79661	0.00404475	1.60789e-06	59	47	11620	GO:0005737	GO:CC	27262	309
1	neuron projection	0.288136	0.0104103	9.22072e-06	59	17	1633	GO:0043005	GO:CC	27262	1851
1	nuclear speck	0.169492	0.021645	1.29359e-05	59	10	462	GO:0016607	GO:CC	27262	771
1	nuclear body	0.220339	0.0141304	1.58642e-05	59	13	920	GO:0016604	GO:CC	27262	768
1	organelle subcompartment	0.254237	0.0108617	4.07216e-05	59	15	1381	GO:0031984	GO:CC	27262	1233
1	plasma membrane region	0.254237	0.0105634	5.82746e-05	59	15	1420	GO:0098590	GO:CC	27262	3226
1	presynapse	0.186441	0.0147849	0.000120342	59	11	744	GO:0098793	GO:CC	27262	3265
1	neuronal cell body	0.186441	0.0147453	0.000123567	59	11	746	GO:0043025	GO:CC	27262	1853
1	somatodendritic compartment	0.220339	0.0116071	0.000150609	59	13	1120	GO:0036477	GO:CC	27262	1724
1	cell body	0.186441	0.0132212	0.00035901	59	11	832	GO:0044297	GO:CC	27262	2056
1	plasma membrane	0.525424	0.00472057	0.000549803	59	31	6567	GO:0005886	GO:CC	27262	424
1	endoplasmic reticulum membrane	0.20339	0.0111732	0.000648053	59	12	1074	GO:0005789	GO:CC	27262	354
1	endoplasmic reticulum subcompartment	0.20339	0.0111111	0.000686336	59	12	1080	GO:0098827	GO:CC	27262	3278
1	vesicle	0.288136	0.00759268	0.000791702	59	17	2239	GO:0031982	GO:CC	27262	1231
1	nuclear outer membrane-endoplasmic reticulum membrane network	0.20339	0.0108696	0.000860262	59	12	1104	GO:0042175	GO:CC	27262	1782
1	endomembrane system	0.40678	0.00560486	0.000884166	59	24	4282	GO:0012505	GO:CC	27262	689
1	cytoplasmic vesicle	0.271186	0.00767386	0.00145976	59	16	2085	GO:0031410	GO:CC	27262	1109
1	intracellular vesicle	0.271186	0.00766284	0.0014868	59	16	2088	GO:0097708	GO:CC	27262	3146
1	glutamatergic synapse	0.152542	0.0147541	0.00149907	59	9	610	GO:0098978	GO:CC	27262	3325
1	cell projection	0.305085	0.0068781	0.00151027	59	18	2617	GO:0042995	GO:CC	27262	1850
1	nucleoplasm	0.372881	0.00577428	0.00171772	59	22	3810	GO:0005654	GO:CC	27262	252
1	axon	0.169492	0.0125786	0.0017686	59	10	795	GO:0030424	GO:CC	27262	935
1	intracellular anatomical structure	0.898305	0.00302771	0.00178188	59	53	17505	GO:0005622	GO:CC	27262	237
1	spliceosomal complex	0.101695	0.0272727	0.00198417	59	6	220	GO:0005681	GO:CC	27262	271
1	synaptic membrane	0.135593	0.0164948	0.00231217	59	8	485	GO:0097060	GO:CC	27262	2907
1	membrane	0.661017	0.00378274	0.00239768	59	39	10310	GO:0016020	GO:CC	27262	722
1	organelle membrane	0.338983	0.00606061	0.00263295	59	20	3300	GO:0031090	GO:CC	27262	1048
1	cell periphery	0.525424	0.00439841	0.00265171	59	31	7048	GO:0071944	GO:CC	27262	2801
1	endoplasmic reticulum protein-containing complex	0.0847458	0.0367647	0.00282236	59	5	136	GO:0140534	GO:CC	27262	3558
1	plasma membrane bounded cell projection	0.288136	0.00675407	0.00377408	59	17	2517	GO:0120025	GO:CC	27262	3453
1	endoplasmic reticulum	0.237288	0.00739176	0.00966925	59	14	1894	GO:0005783	GO:CC	27262	348
1	excitatory synapse	0.0677966	0.0454545	0.00982402	59	4	88	GO:0060076	GO:CC	27262	2271
1	dendrite	0.152542	0.011236	0.01283	59	9	801	GO:0030425	GO:CC	27262	936
1	dendritic tree	0.152542	0.011208	0.0130789	59	9	803	GO:0097447	GO:CC	27262	3014
1	postsynaptic membrane	0.101695	0.0180723	0.0199052	59	6	332	GO:0045211	GO:CC	27262	2148
1	Derlin-1 retrotranslocation complex	0.0338983	0.25	0.0311832	59	2	8	GO:0036513	GO:CC	27262	1728
1	cell surface	0.169492	0.00877963	0.036988	59	10	1139	GO:0009986	GO:CC	27262	663
1	distal axon	0.101695	0.0153846	0.0478119	59	6	390	GO:0150034	GO:CC	27262	3593
1	protein binding	0.836364	0.00438471	8.34397e-08	55	46	10491	GO:0005515	GO:MF	25177	1496
1	mRNA binding	0.2	0.0282776	3.1647e-07	55	11	389	GO:0003729	GO:MF	25177	351
1	protein domain specific binding	0.236364	0.0159119	7.7433e-06	55	13	817	GO:0019904	GO:MF	25177	3759
1	RS domain binding	0.0545455	0.5	9.17632e-05	55	3	6	GO:0050733	GO:MF	25177	7968
1	binding	0.927273	0.0031296	0.000648018	55	51	16296	GO:0005488	GO:MF	25177	1484
1	protein-containing complex binding	0.236364	0.00832266	0.0111961	55	13	1562	GO:0044877	GO:MF	25177	6099
1	enzyme binding	0.272727	0.00648508	0.0428472	55	15	2313	GO:0019899	GO:MF	25177	3754
1	kinase binding	0.163636	0.0103806	0.0468201	55	9	867	GO:0019900	GO:MF	25177	3755
1	identical protein binding	0.272727	0.00642674	0.0474658	55	15	2334	GO:0042802	GO:MF	25177	5683
1	Abnormal autonomic nervous system physiology	0.269231	0.057377	0.00317517	26	7	122	HP:0012332	HP	4965	8729
1	EEG with generalized slow activity	0.153846	0.137931	0.0200728	26	4	29	HP:0010845	HP	4965	7277
1	Paget disease of bone	0.0769231	1	0.0412081	26	2	2	HP:0034159	HP	4965	14146
1	Ferroptosis	0.0967742	0.075	0.022567	31	3	40	KEGG:04216	KEGG	8947	287
1	mmu-miR-324-3p	0.222222	0.02849	0.00868789	45	10	351	MIRNA:mmu-miR-324-3p	MIRNA	7220	1499
1	mmu-miR-7b-5p	0.244444	0.0242826	0.0146605	45	11	453	MIRNA:mmu-miR-7b-5p	MIRNA	7220	1993
1	Factor: Kaiso; motif: SARNYCTCGCGAGAN	0.948276	0.00406805	6.31971e-06	58	55	13520	TF:M10276	TF	21866	3790
1	Factor: FOXN4; motif: NNWANNCGWMCGCGTCNNNNMT; match class: 1	0.913793	0.00413965	3.15841e-05	58	53	12803	TF:M04662_1	TF	21866	1157
1	Factor: ZF5; motif: NRNGNGCGCGCWN; match class: 1	0.827586	0.00427617	0.000638565	58	48	11225	TF:M00333_1	TF	21866	3827
1	Factor: IRF4; motif: NNNAYTCTCGGWNNN; match class: 1	0.689655	0.004914	0.000970787	58	40	8140	TF:M02872_1	TF	21866	1749
1	Factor: SP6; motif: WGGGCGG	0.637931	0.00509081	0.00194373	58	37	7268	TF:M05455	TF	21866	3264
1	Factor: Sp3; motif: AGGGCGG	0.637931	0.00509081	0.00194373	58	37	7268	TF:M05665	TF	21866	3244
1	Factor: LKLF; motif: NGGGCGG	0.637931	0.00509081	0.00194373	58	37	7268	TF:M05391	TF	21866	1916
1	Factor: CPBP; motif: NGGGCGG	0.637931	0.00509081	0.00194373	58	37	7268	TF:M05301	TF	21866	540
1	Factor: Wt1; motif: NNCCTCCCCCACNN	0.568966	0.0055	0.00237688	58	33	6000	TF:M12438	TF	21866	3736
1	Factor: E2F; motif: TTTSGCGC; match class: 1	0.258621	0.0103164	0.00425705	58	15	1454	TF:M00050_1	TF	21866	771
1	Factor: Zfp281; motif: GGGGTGGGGGAGGGG	0.0862069	0.0520833	0.00595426	58	5	96	TF:M10420	TF	21866	3876
1	Factor: YY1; motif: GCCGCCATTTTG; match class: 1	0.224138	0.011535	0.00649637	58	13	1127	TF:M02044_1	TF	21866	3757
1	Factor: E2F; motif: TTTSGCGC	0.551724	0.00518219	0.0157432	58	32	6175	TF:M00050	TF	21866	770
1	Factor: BCL6B; motif: NNNNCCGCCCCWNNNN	0.87931	0.00371747	0.0188857	58	51	13719	TF:M02844	TF	21866	262
1	Factor: E2F; motif: TTTSGCGSG	0.465517	0.00560282	0.0321105	58	27	4819	TF:M00918	TF	21866	776
1	Factor: E2F; motif: NNTTTCGCGCN	0.482759	0.00541063	0.0397102	58	28	5175	TF:M08875	TF	21866	782
1	mRNA processing	0.321429	0.0201794	0.0355356	28	9	446	WP:WP310	WP	4531	146
2	Respiratory chain complex I, mitochondrial	0.473684	0.257143	1.64702e-07	19	9	35	CORUM:381	CORUM	1082	59
2	Respiratory chain complex I, mitochondrial	0.473684	0.243243	2.85242e-07	19	9	37	CORUM:382	CORUM	1082	60
2	aerobic respiration	0.310811	0.114428	3.51395e-28	74	23	201	GO:0009060	GO:BP	27205	3312
2	oxidative phosphorylation	0.283784	0.143836	1.27791e-27	74	21	146	GO:0006119	GO:BP	27205	2021
2	cellular respiration	0.310811	0.0871212	2.28728e-25	74	23	264	GO:0045333	GO:BP	27205	12059
2	energy derivation by oxidation of organic compounds	0.310811	0.0651558	2.00216e-22	74	23	353	GO:0015980	GO:BP	27205	5183
2	generation of precursor metabolites and energy	0.324324	0.0567376	4.0577e-22	74	24	423	GO:0006091	GO:BP	27205	1998
2	proton motive force-driven ATP synthesis	0.189189	0.2	1.28306e-19	74	14	70	GO:0015986	GO:BP	27205	5185
2	proton motive force-driven mitochondrial ATP synthesis	0.175676	0.206349	3.13314e-18	74	13	63	GO:0042776	GO:BP	27205	10938
2	ATP biosynthetic process	0.189189	0.133333	5.66661e-17	74	14	105	GO:0006754	GO:BP	27205	2506
2	mitochondrial ATP synthesis coupled electron transport	0.175676	0.158537	1.28324e-16	74	13	82	GO:0042775	GO:BP	27205	10937
2	ATP synthesis coupled electron transport	0.175676	0.154762	1.79264e-16	74	13	84	GO:0042773	GO:BP	27205	10935
2	purine ribonucleoside triphosphate biosynthetic process	0.189189	0.12069	2.44408e-16	74	14	116	GO:0009206	GO:BP	27205	3448
2	purine nucleoside triphosphate biosynthetic process	0.189189	0.119658	2.77055e-16	74	14	117	GO:0009145	GO:BP	27205	3388
2	purine-containing compound metabolic process	0.283784	0.0416667	3.85855e-16	74	21	504	GO:0072521	GO:BP	27205	18397
2	ribonucleoside triphosphate biosynthetic process	0.189189	0.114754	5.09914e-16	74	14	122	GO:0009201	GO:BP	27205	3443
2	nucleoside triphosphate biosynthetic process	0.189189	0.105263	1.78384e-15	74	14	133	GO:0009142	GO:BP	27205	3385
2	purine nucleotide metabolic process	0.27027	0.042735	1.95812e-15	74	20	468	GO:0006163	GO:BP	27205	2042
2	ATP metabolic process	0.189189	0.0979021	5.0746e-15	74	14	143	GO:0046034	GO:BP	27205	12513
2	respiratory electron transport chain	0.175676	0.116071	9.17954e-15	74	13	112	GO:0022904	GO:BP	27205	6993
2	nucleobase-containing small molecule metabolic process	0.283784	0.035473	1.02177e-14	74	21	592	GO:0055086	GO:BP	27205	15068
2	nucleotide metabolic process	0.27027	0.0383877	1.57715e-14	74	20	521	GO:0009117	GO:BP	27205	3362
2	nucleoside phosphate metabolic process	0.27027	0.0376648	2.27885e-14	74	20	531	GO:0006753	GO:BP	27205	2505
2	purine ribonucleoside triphosphate metabolic process	0.189189	0.0838323	4.67052e-14	74	14	167	GO:0009205	GO:BP	27205	3447
2	purine nucleoside triphosphate metabolic process	0.189189	0.0809249	7.7136e-14	74	14	173	GO:0009144	GO:BP	27205	3387
2	ribonucleoside triphosphate metabolic process	0.189189	0.08	9.08031e-14	74	14	175	GO:0009199	GO:BP	27205	3441
2	aerobic electron transport chain	0.148649	0.15942	1.01392e-13	74	11	69	GO:0019646	GO:BP	27205	6286
2	electron transport chain	0.175676	0.0962963	1.12661e-13	74	13	135	GO:0022900	GO:BP	27205	6992
2	proton transmembrane transport	0.175676	0.0896552	2.91438e-13	74	13	145	GO:1902600	GO:BP	27205	23418
2	purine ribonucleotide metabolic process	0.22973	0.0455764	3.80842e-13	74	17	373	GO:0009150	GO:BP	27205	3393
2	nucleoside triphosphate metabolic process	0.189189	0.0721649	3.89915e-13	74	14	194	GO:0009141	GO:BP	27205	3384
2	ribonucleotide metabolic process	0.22973	0.0431472	9.45266e-13	74	17	394	GO:0009259	GO:BP	27205	3500
2	organophosphate metabolic process	0.310811	0.0238589	1.12773e-12	74	23	964	GO:0019637	GO:BP	27205	6280
2	purine ribonucleotide biosynthetic process	0.189189	0.0666667	1.18761e-12	74	14	210	GO:0009152	GO:BP	27205	3395
2	ribose phosphate metabolic process	0.22973	0.0421836	1.37378e-12	74	17	403	GO:0019693	GO:BP	27205	6330
2	ribonucleotide biosynthetic process	0.189189	0.0622222	3.1171e-12	74	14	225	GO:0009260	GO:BP	27205	3501
2	ribose phosphate biosynthetic process	0.189189	0.0603448	4.77799e-12	74	14	232	GO:0046390	GO:BP	27205	12823
2	purine nucleotide biosynthetic process	0.189189	0.0566802	1.14134e-11	74	14	247	GO:0006164	GO:BP	27205	2043
2	purine-containing compound biosynthetic process	0.189189	0.0544747	1.97776e-11	74	14	257	GO:0072522	GO:BP	27205	18398
2	nucleotide biosynthetic process	0.189189	0.0496454	7.11502e-11	74	14	282	GO:0009165	GO:BP	27205	3407
2	nucleoside phosphate biosynthetic process	0.189189	0.0491228	8.2288e-11	74	14	285	GO:1901293	GO:BP	27205	22331
2	small molecule metabolic process	0.364865	0.0144077	3.96381e-10	74	27	1874	GO:0044281	GO:BP	27205	11589
2	organophosphate biosynthetic process	0.216216	0.0284192	4.62919e-09	74	16	563	GO:0090407	GO:BP	27205	19299
2	carbohydrate derivative metabolic process	0.27027	0.0191939	7.25372e-09	74	20	1042	GO:1901135	GO:BP	27205	22199
2	mitochondrial respiratory chain complex I assembly	0.108108	0.133333	1.05369e-08	74	8	60	GO:0032981	GO:BP	27205	8391
2	NADH dehydrogenase complex assembly	0.108108	0.133333	1.05369e-08	74	8	60	GO:0010257	GO:BP	27205	4112
2	carbohydrate derivative biosynthetic process	0.202703	0.0230769	4.53159e-07	74	15	650	GO:1901137	GO:BP	27205	22201
2	mitochondrial respiratory chain complex assembly	0.108108	0.0808081	6.48071e-07	74	8	99	GO:0033108	GO:BP	27205	8471
2	detoxification	0.108108	0.0592593	7.75698e-06	74	8	135	GO:0098754	GO:BP	27205	19924
2	phosphate-containing compound metabolic process	0.351351	0.009319	1.88129e-05	74	26	2790	GO:0006796	GO:BP	27205	2537
2	phosphorus metabolic process	0.351351	0.0092428	2.23303e-05	74	26	2813	GO:0006793	GO:BP	27205	2534
2	mitochondrial electron transport, NADH to ubiquinone	0.0675676	0.178571	2.76083e-05	74	5	28	GO:0006120	GO:BP	27205	2022
2	mitochondrion organization	0.162162	0.0216216	7.29432e-05	74	12	555	GO:0007005	GO:BP	27205	2676
2	mitochondrial electron transport, ubiquinol to cytochrome c	0.0540541	0.285714	0.000112378	74	4	14	GO:0006122	GO:BP	27205	2024
2	metabolic process	0.837838	0.00422487	0.000134256	74	62	14675	GO:0008152	GO:BP	27205	3197
2	organonitrogen compound biosynthetic process	0.256757	0.0108634	0.000330071	74	19	1749	GO:1901566	GO:BP	27205	22565
2	inorganic ion transmembrane transport	0.189189	0.0152505	0.000354799	74	14	918	GO:0098660	GO:BP	27205	19866
2	inorganic cation transmembrane transport	0.175676	0.0160891	0.000568613	74	13	808	GO:0098662	GO:BP	27205	19868
2	response to toxic substance	0.108108	0.0326531	0.00079203	74	8	245	GO:0009636	GO:BP	27205	3631
2	monoatomic cation transmembrane transport	0.175676	0.0154578	0.000895466	74	13	841	GO:0098655	GO:BP	27205	19861
2	cellular detoxification	0.0810811	0.0517241	0.00175358	74	6	116	GO:1990748	GO:BP	27205	26515
2	transmembrane transport	0.22973	0.01078	0.00191977	74	17	1577	GO:0055085	GO:BP	27205	15067
2	organonitrogen compound metabolic process	0.5	0.00570196	0.00211994	74	37	6489	GO:1901564	GO:BP	27205	22563
2	biosynthetic process	0.472973	0.00587248	0.002643	74	35	5960	GO:0009058	GO:BP	27205	3310
2	cellular response to toxic substance	0.0810811	0.0472441	0.00298391	74	6	127	GO:0097237	GO:BP	27205	19590
2	organic substance biosynthetic process	0.459459	0.0057971	0.00580043	74	34	5865	GO:1901576	GO:BP	27205	22571
2	monoatomic ion transmembrane transport	0.175676	0.0127953	0.00732161	74	13	1016	GO:0034220	GO:BP	27205	8951
2	cellular process	0.959459	0.00342482	0.00927962	74	71	20731	GO:0009987	GO:BP	27205	3889
2	monoatomic cation transport	0.175676	0.0122295	0.0119641	74	13	1063	GO:0006812	GO:BP	27205	2548
2	cellular metabolic process	0.689189	0.00432387	0.0176449	74	51	11795	GO:0044237	GO:BP	27205	11571
2	cellular biosynthetic process	0.418919	0.00566313	0.0362398	74	31	5474	GO:0044249	GO:BP	27205	11577
2	negative regulation of dendritic cell differentiation	0.027027	0.666667	0.0496792	74	2	3	GO:2001199	GO:BP	27205	27689
2	inner mitochondrial membrane protein complex	0.324324	0.16	2.97464e-34	74	24	150	GO:0098800	GO:CC	27262	3271
2	mitochondrial protein-containing complex	0.364865	0.089404	8.89635e-32	74	27	302	GO:0098798	GO:CC	27262	3269
2	mitochondrial inner membrane	0.391892	0.0535055	7.23849e-28	74	29	542	GO:0005743	GO:CC	27262	314
2	respiratory chain complex	0.243243	0.2	5.51168e-27	74	18	90	GO:0098803	GO:CC	27262	3273
2	mitochondrial respirasome	0.243243	0.2	5.51168e-27	74	18	90	GO:0005746	GO:CC	27262	317
2	organelle inner membrane	0.391892	0.0480929	1.56235e-26	74	29	603	GO:0019866	GO:CC	27262	826
2	respirasome	0.243243	0.183673	2.94576e-26	74	18	98	GO:0070469	GO:CC	27262	2505
2	mitochondrial membrane	0.418919	0.0398458	3.77035e-26	74	31	778	GO:0031966	GO:CC	27262	1217
2	mitochondrial envelope	0.418919	0.037037	3.45927e-25	74	31	837	GO:0005740	GO:CC	27262	311
2	envelope	0.445946	0.0255418	5.75795e-22	74	33	1292	GO:0031975	GO:CC	27262	1225
2	organelle envelope	0.445946	0.0255418	5.75795e-22	74	33	1292	GO:0031967	GO:CC	27262	1218
2	mitochondrion	0.513514	0.0194772	7.04418e-22	74	38	1951	GO:0005739	GO:CC	27262	310
2	membrane protein complex	0.432432	0.026534	1.14659e-21	74	32	1206	GO:0098796	GO:CC	27262	3267
2	oxidoreductase complex	0.216216	0.131148	1.2507e-20	74	16	122	GO:1990204	GO:CC	27262	3808
2	myelin sheath	0.243243	0.0857143	5.35457e-20	74	18	210	GO:0043209	GO:CC	27262	1877
2	catalytic complex	0.472973	0.0195859	8.69581e-20	74	35	1787	GO:1902494	GO:CC	27262	3620
2	cytoplasm	0.932432	0.00593804	6.581e-18	74	69	11620	GO:0005737	GO:CC	27262	309
2	organelle membrane	0.554054	0.0124242	9.46401e-17	74	41	3300	GO:0031090	GO:CC	27262	1048
2	respiratory chain complex I	0.148649	0.22	2.30178e-16	74	11	50	GO:0045271	GO:CC	27262	2178
2	mitochondrial respiratory chain complex I	0.148649	0.22	2.30178e-16	74	11	50	GO:0005747	GO:CC	27262	318
2	NADH dehydrogenase complex	0.148649	0.22	2.30178e-16	74	11	50	GO:0030964	GO:CC	27262	1017
2	transmembrane transporter complex	0.22973	0.0433673	9.14602e-14	74	17	392	GO:1902495	GO:CC	27262	3621
2	transporter complex	0.22973	0.0407674	2.54247e-13	74	17	417	GO:1990351	GO:CC	27262	3868
2	cytochrome complex	0.108108	0.2	3.54227e-11	74	8	40	GO:0070069	GO:CC	27262	2430
2	membrane-bounded organelle	0.918919	0.00453545	8.85882e-10	74	68	14993	GO:0043227	GO:CC	27262	1884
2	protein-containing complex	0.635135	0.00641901	1.07625e-08	74	47	7322	GO:0032991	GO:CC	27262	1343
2	organelle	0.932432	0.00425427	1.26772e-08	74	69	16219	GO:0043226	GO:CC	27262	1883
2	intracellular anatomical structure	0.959459	0.00405598	1.66127e-08	74	71	17505	GO:0005622	GO:CC	27262	237
2	intracellular membrane-bounded organelle	0.878378	0.0044772	5.34965e-08	74	65	14518	GO:0043231	GO:CC	27262	1888
2	mitochondrial proton-transporting ATP synthase complex	0.0675676	0.238095	6.25324e-07	74	5	21	GO:0005753	GO:CC	27262	322
2	proton-transporting ATP synthase complex	0.0675676	0.227273	8.07536e-07	74	5	22	GO:0045259	GO:CC	27262	2166
2	intracellular organelle	0.891892	0.00415329	1.32715e-06	74	66	15891	GO:0043229	GO:CC	27262	1886
2	mitochondrial respiratory chain complex IV	0.0675676	0.2	1.61896e-06	74	5	25	GO:0005751	GO:CC	27262	321
2	proton-transporting two-sector ATPase complex	0.0810811	0.113208	1.67049e-06	74	6	53	GO:0016469	GO:CC	27262	745
2	respiratory chain complex IV	0.0675676	0.178571	2.97585e-06	74	5	28	GO:0045277	GO:CC	27262	2184
2	respiratory chain complex III	0.0540541	0.333333	6.02685e-06	74	4	12	GO:0045275	GO:CC	27262	2182
2	mitochondrial respiratory chain complex III	0.0540541	0.333333	6.02685e-06	74	4	12	GO:0005750	GO:CC	27262	320
2	membrane	0.675676	0.00484966	4.97312e-05	74	50	10310	GO:0016020	GO:CC	27262	722
2	proton-transporting two-sector ATPase complex, proton-transporting domain	0.0540541	0.148148	0.000207193	74	4	27	GO:0033177	GO:CC	27262	1397
2	cellular anatomical entity	1	0.00324618	0.000431958	74	74	22796	GO:0110165	GO:CC	27262	3449
2	ATPase complex	0.0810811	0.0410959	0.000723039	74	6	146	GO:1904949	GO:CC	27262	3698
2	mitochondrial proton-transporting ATP synthase complex, coupling factor F(o)	0.0405405	0.25	0.00102722	74	3	12	GO:0000276	GO:CC	27262	44
2	proton-transporting ATP synthase complex, coupling factor F(o)	0.0405405	0.214286	0.00169295	74	3	14	GO:0045263	GO:CC	27262	2170
2	extrinsic component of mitochondrial outer membrane	0.027027	1	0.00179918	74	2	2	GO:0031315	GO:CC	27262	1095
2	cytosol	0.351351	0.00629998	0.00418323	74	26	4127	GO:0005829	GO:CC	27262	380
2	mitochondrial proton-transporting ATP synthase complex, catalytic sector F(1)	0.027027	0.4	0.0178969	74	2	5	GO:0000275	GO:CC	27262	43
2	proton-transporting ATP synthase complex, catalytic core F(1)	0.027027	0.333333	0.0267981	74	2	6	GO:0045261	GO:CC	27262	2168
2	mitochondrial permeability transition pore complex	0.027027	0.285714	0.0374514	74	2	7	GO:0005757	GO:CC	27262	325
2	proteasome core complex, alpha-subunit complex	0.027027	0.25	0.0498473	74	2	8	GO:0019773	GO:CC	27262	814
2	proton transmembrane transporter activity	0.161765	0.0956522	6.31502e-12	68	11	115	GO:0015078	GO:MF	25177	2307
2	peroxiredoxin activity	0.0588235	0.4	4.67293e-06	68	4	10	GO:0051920	GO:MF	25177	8140
2	transmembrane transporter activity	0.235294	0.0149393	8.7085e-06	68	16	1071	GO:0022857	GO:MF	25177	3819
2	oxidoreduction-driven active transmembrane transporter activity	0.0735294	0.16129	9.21667e-06	68	5	31	GO:0015453	GO:MF	25177	2571
2	transporter activity	0.235294	0.0136752	2.96414e-05	68	16	1170	GO:0005215	GO:MF	25177	1358
2	proton-transporting ATP synthase activity, rotational mechanism	0.0588235	0.25	4.00072e-05	68	4	16	GO:0046933	GO:MF	25177	6301
2	primary active transmembrane transporter activity	0.102941	0.05	4.78078e-05	68	7	140	GO:0015399	GO:MF	25177	2532
2	protein-containing complex binding	0.264706	0.0115237	5.04662e-05	68	18	1562	GO:0044877	GO:MF	25177	6099
2	active transmembrane transporter activity	0.147059	0.0249377	5.55554e-05	68	10	401	GO:0022804	GO:MF	25177	3792
2	inorganic molecular entity transmembrane transporter activity	0.176471	0.0186625	6.35075e-05	68	12	643	GO:0015318	GO:MF	25177	2484
2	inorganic cation transmembrane transporter activity	0.161765	0.0209924	6.95318e-05	68	11	524	GO:0022890	GO:MF	25177	3841
2	electron transfer activity	0.0735294	0.0943396	0.000148682	68	5	53	GO:0009055	GO:MF	25177	2138
2	monoatomic cation transmembrane transporter activity	0.161765	0.0194346	0.000149835	68	11	566	GO:0008324	GO:MF	25177	1662
2	thioredoxin peroxidase activity	0.0441176	0.5	0.000173468	68	3	6	GO:0008379	GO:MF	25177	1675
2	proton channel activity	0.0588235	0.173913	0.000191898	68	4	23	GO:0015252	GO:MF	25177	2449
2	thioredoxin-dependent peroxiredoxin activity	0.0441176	0.428571	0.000302981	68	3	7	GO:0140824	GO:MF	25177	10827
2	oxidoreductase activity	0.176471	0.0153649	0.000499819	68	12	781	GO:0016491	GO:MF	25177	2828
2	monoatomic ion transmembrane transporter activity	0.161765	0.0158501	0.00109761	68	11	694	GO:0015075	GO:MF	25177	2306
2	ligase activity	0.0882353	0.0352941	0.00310857	68	6	170	GO:0016874	GO:MF	25177	3065
2	protein tag	0.0441176	0.2	0.00387818	68	3	15	GO:0031386	GO:MF	25177	4143
2	peroxidase activity	0.0588235	0.0689655	0.0085632	68	4	58	GO:0004601	GO:MF	25177	917
2	oxidoreductase activity, acting on peroxide as acceptor	0.0588235	0.0666667	0.00980224	68	4	60	GO:0016684	GO:MF	25177	2915
2	ubiquinol-cytochrome-c reductase activity	0.0294118	0.666667	0.00996554	68	2	3	GO:0008121	GO:MF	25177	1569
2	ATP:ADP antiporter activity	0.0294118	0.5	0.0198963	68	2	4	GO:0005471	GO:MF	25177	1479
2	oxidoreductase activity, acting on diphenols and related substances as donors	0.0294118	0.4	0.0331025	68	2	5	GO:0016679	GO:MF	25177	2912
2	oxidative phosphorylation uncoupler activity	0.0294118	0.4	0.0331025	68	2	5	GO:0017077	GO:MF	25177	3153
2	antioxidant activity	0.0588235	0.0465116	0.0404938	68	4	86	GO:0016209	GO:MF	25177	2743
2	Increased serum lactate	0.533333	0.0788177	4.1425e-12	30	16	203	HP:0002151	HP	4965	1581
2	Acidosis	0.6	0.0477454	2.45719e-10	30	18	377	HP:0001941	HP	4965	1411
2	Abnormality of acid-base homeostasis	0.6	0.044665	7.86341e-10	30	18	403	HP:0004360	HP	4965	3051
2	Abnormal activity of mitochondrial respiratory chain	0.4	0.0991736	2.1015e-09	30	12	121	HP:0011922	HP	4965	8325
2	Decreased activity of mitochondrial respiratory chain	0.4	0.0991736	2.1015e-09	30	12	121	HP:0008972	HP	4965	5599
2	Abnormality of the mitochondrion	0.433333	0.0653266	4.26525e-08	30	13	199	HP:0012103	HP	4965	8505
2	Abnormality of mitochondrial metabolism	0.4	0.0677966	1.99693e-07	30	12	177	HP:0003287	HP	4965	2378
2	Increased CSF lactate	0.333333	0.0943396	3.74723e-07	30	10	106	HP:0002490	HP	4965	1804
2	Abnormal CSF lactate concentration	0.333333	0.0943396	3.74723e-07	30	10	106	HP:0030085	HP	4965	10224
2	Lactic acidosis	0.366667	0.0625	3.43685e-06	30	11	176	HP:0003128	HP	4965	2256
2	Abnormal CSF metabolite concentration	0.333333	0.0699301	7.31531e-06	30	10	143	HP:0025454	HP	4965	9884
2	Decreased activity of mitochondrial complex I	0.266667	0.106667	1.1542e-05	30	8	75	HP:0011923	HP	4965	8326
2	Abnormal cellular physiology	0.5	0.0257732	0.000363271	30	15	582	HP:0011017	HP	4965	7440
2	Muscle abnormality related to mitochondrial dysfunction	0.233333	0.0897436	0.000380397	30	7	78	HP:0003800	HP	4965	2686
2	Hypertrophic cardiomyopathy	0.366667	0.0391459	0.000454299	30	11	281	HP:0001639	HP	4965	1193
2	Abnormal cellular phenotype	0.5	0.0245098	0.000708351	30	15	612	HP:0025354	HP	4965	9793
2	Leukodystrophy	0.233333	0.0569106	0.00849992	30	7	123	HP:0002415	HP	4965	1766
2	Focal T2 hyperintense basal ganglia lesion	0.166667	0.108696	0.00909697	30	5	46	HP:0007183	HP	4965	4620
2	Decreased activity of mitochondrial complex IV	0.166667	0.1	0.0138259	30	5	50	HP:0008347	HP	4965	5277
2	Decreased activity of mitochondrial complex III	0.133333	0.142857	0.0278607	30	4	28	HP:0011924	HP	4965	8327
2	Abnormal basal ganglia MRI signal intensity	0.166667	0.0862069	0.028908	30	5	58	HP:0012751	HP	4965	9141
2	Abnormal circulating amino acid concentration	0.233333	0.0460526	0.0343265	30	7	152	HP:0003112	HP	4965	2245
2	Abnormality of metabolism/homeostasis	0.866667	0.0105348	0.0345314	30	26	2468	HP:0001939	HP	4965	1410
2	Failure to thrive	0.566667	0.0157407	0.0437523	30	17	1080	HP:0001508	HP	4965	1117
2	Parkinson disease	0.491525	0.110687	1.54673e-27	59	29	262	KEGG:05012	KEGG	8947	405
2	Oxidative phosphorylation	0.40678	0.180451	1.7369e-27	59	24	133	KEGG:00190	KEGG	8947	18
2	Chemical carcinogenesis - reactive oxygen species	0.440678	0.118182	5.00661e-25	59	26	220	KEGG:05208	KEGG	8947	453
2	Prion disease	0.457627	0.101504	2.62647e-24	59	27	266	KEGG:05020	KEGG	8947	409
2	Huntington disease	0.457627	0.09	7.02438e-23	59	27	300	KEGG:05016	KEGG	8947	407
2	Diabetic cardiomyopathy	0.40678	0.117647	8.4809e-23	59	24	204	KEGG:05415	KEGG	8947	485
2	Pathways of neurodegeneration - multiple diseases	0.491525	0.0618337	3.4212e-20	59	29	469	KEGG:05022	KEGG	8947	410
2	Thermogenesis	0.389831	0.100877	3.68476e-20	59	23	228	KEGG:04714	KEGG	8947	343
2	Alzheimer disease	0.457627	0.0710526	4.04604e-20	59	27	380	KEGG:05010	KEGG	8947	404
2	Amyotrophic lateral sclerosis	0.440678	0.0710383	3.0717e-19	59	26	366	KEGG:05014	KEGG	8947	406
2	Non-alcoholic fatty liver disease	0.305085	0.116883	1.79539e-16	59	18	154	KEGG:04932	KEGG	8947	382
2	Metabolic pathways	0.661017	0.0242236	3.10113e-14	59	39	1610	KEGG:01100	KEGG	8947	181
2	Retrograde endocannabinoid signaling	0.186441	0.0753425	1.69404e-07	59	11	146	KEGG:04723	KEGG	8947	347
2	Cardiac muscle contraction	0.118644	0.0804598	0.000115393	59	7	87	KEGG:04260	KEGG	8947	290
2	Respiratory electron transport, ATP synthesis by chemiosmotic coupling, and heat production by uncoupling proteins.	0.338983	0.176991	4.19573e-21	59	20	113	REAC:R-MMU-163200	REAC	8362	1289
2	The citric acid (TCA) cycle and respiratory electron transport	0.372881	0.138365	4.97407e-21	59	22	159	REAC:R-MMU-1428517	REAC	8362	1554
2	Respiratory electron transport	0.254237	0.166667	7.86621e-15	59	15	90	REAC:R-MMU-611105	REAC	8362	1288
2	Complex I biogenesis	0.152542	0.173077	2.15483e-08	59	9	52	REAC:R-MMU-6799198	REAC	8362	307
2	Metabolism	0.576271	0.0204327	5.56655e-08	59	34	1664	REAC:R-MMU-1430728	REAC	8362	800
2	Cristae formation	0.0847458	0.294118	2.75253e-05	59	5	17	REAC:R-MMU-8949613	REAC	8362	319
2	Formation of ATP by chemiosmotic coupling	0.0847458	0.294118	2.75253e-05	59	5	17	REAC:R-MMU-163210	REAC	8362	500
2	Cellular response to chemical stress	0.169492	0.0653595	2.94353e-05	59	10	153	REAC:R-MMU-9711123	REAC	8362	261
2	Cellular responses to stimuli	0.254237	0.034642	6.37195e-05	59	15	433	REAC:R-MMU-8953897	REAC	8362	265
2	Mitochondrial biogenesis	0.0847458	0.178571	0.000411982	59	5	28	REAC:R-MMU-1592230	REAC	8362	842
2	Cellular responses to stress	0.220339	0.0302326	0.00218885	59	13	430	REAC:R-MMU-2262752	REAC	8362	266
2	TP53 Regulates Metabolic Genes	0.101695	0.0857143	0.00283693	59	6	70	REAC:R-MMU-5628897	REAC	8362	1510
2	Organelle biogenesis and maintenance	0.135593	0.0390244	0.0278195	59	8	205	REAC:R-MMU-1852241	REAC	8362	966
2	Aggrephagy	0.0677966	0.111111	0.0358915	59	4	36	REAC:R-MMU-9646399	REAC	8362	92
2	Metallothioneins bind metals	0.0338983	0.666667	0.0471512	59	2	3	REAC:R-MMU-5661231	REAC	8362	827
2	Response to metal ions	0.0338983	0.666667	0.0471512	59	2	3	REAC:R-MMU-5660526	REAC	8362	1291
2	Factor: FOXN4; motif: NNWANNCGWMCGCGTCNNNNMT	0.96	0.0044913	0.00031103	75	72	16031	TF:M04662	TF	21866	1156
2	Factor: BEN; motif: CAGCGRNV; match class: 1	0.826667	0.00515507	0.000455259	75	62	12027	TF:M01240_1	TF	21866	279
2	Factor: COUP-TF1; motif: TGACCTY; match class: 1	0.213333	0.0137575	0.00184336	75	16	1163	TF:M03542_1	TF	21866	523
2	Factor: ERR1; motif: NNNTCAAGGTCA	0.24	0.0120563	0.0024186	75	18	1493	TF:M10223	TF	21866	1002
2	Factor: ZF5; motif: GSGCGCGR	0.906667	0.00457297	0.00388486	75	68	14870	TF:M00716	TF	21866	3824
2	Factor: LRH-1; motif: NNNYCAAGGYCAN	0.32	0.00920598	0.00401808	75	24	2607	TF:M07360	TF	21866	1940
2	Factor: ERR1; motif: NNNNCAAGGTCANNNNN	0.226667	0.0119803	0.00537218	75	17	1419	TF:M02748	TF	21866	996
2	Factor: Atf-1; motif: RTGACGTA; match class: 1	0.346667	0.00836013	0.00805596	75	26	3110	TF:M07980_1	TF	21866	193
2	Factor: FXR:RXR; motif: RGGTCANTGACCTN	0.253333	0.0104683	0.0093828	75	19	1815	TF:M07256	TF	21866	1220
2	Factor: SF-1; motif: TGACCTTGN	0.253333	0.0104167	0.0100734	75	19	1824	TF:M01132	TF	21866	3016
2	Factor: ERR3; motif: CAAGGTCA	0.306667	0.00876524	0.015691	75	23	2624	TF:M02000	TF	21866	978
2	Factor: SF-1; motif: TGACCTTG	0.306667	0.00876524	0.015691	75	23	2624	TF:M00727	TF	21866	3014
2	Factor: LRH-1; motif: NYCAAGGYCAN	0.373333	0.00762527	0.0179914	75	28	3672	TF:M09702	TF	21866	1932
2	Factor: ZF5; motif: GYCGCGCARNGCNN	0.68	0.00535152	0.0189166	75	51	9530	TF:M02933	TF	21866	3838
2	Factor: Pax-5; motif: RRMSWGANWYCTNRAGCGKRACSRYNSM; match class: 1	0.48	0.00650289	0.0208752	75	36	5536	TF:M00144_1	TF	21866	2625
2	Factor: IRF6; motif: NNNACTCYCGGKNNN	0.84	0.0046868	0.0211283	75	63	13442	TF:M02874	TF	21866	1766
2	Factor: CREB; motif: NNGNTGACGTNN	0.426667	0.00693993	0.0228878	75	32	4611	TF:M00113	TF	21866	568
2	Factor: ZF5; motif: GSGCGCGR; match class: 1	0.786667	0.00487805	0.0235452	75	59	12095	TF:M00716_1	TF	21866	3825
2	Factor: BEN; motif: CAGCGRNV	0.933333	0.0043016	0.0271972	75	70	16273	TF:M01240	TF	21866	278
2	Factor: E2F-1; motif: NNNSSCGCSAANN	0.653333	0.00541377	0.0272052	75	49	9051	TF:M07250	TF	21866	736
2	Factor: SF-1; motif: NYYCAAGGYCA	0.32	0.00823328	0.0273597	75	24	2915	TF:M10386	TF	21866	3008
2	Factor: ELK-1; motif: ACCGGAWRTN	0.88	0.00448065	0.0377975	75	66	14730	TF:M01981	TF	21866	910
2	Electron transport chain	0.425532	0.217391	4.24464e-21	47	20	92	WP:WP295	WP	4531	5
2	Oxidative phosphorylation	0.255319	0.222222	3.55315e-12	47	12	54	WP:WP1248	WP	4531	98
2	Oxidative stress and redox pathway	0.12766	0.0652174	0.0135013	47	6	92	WP:WP4466	WP	4531	15
4	Mt3-Hsp84-Ck complex	0.166667	0.666667	0.0499221	12	2	3	CORUM:677	CORUM	1082	104
4	transport	0.550562	0.010506	9.83747e-13	89	49	4664	GO:0006810	GO:BP	27205	2546
4	establishment of localization	0.550562	0.0101597	3.89334e-12	89	49	4823	GO:0051234	GO:BP	27205	14353
4	localization	0.58427	0.00947004	4.88033e-12	89	52	5491	GO:0051179	GO:BP	27205	14323
4	regulation of biological quality	0.449438	0.0123305	1.382e-11	89	40	3244	GO:0065008	GO:BP	27205	16812
4	cellular localization	0.449438	0.011458	1.61888e-10	89	40	3491	GO:0051641	GO:BP	27205	14642
4	regulation of transport	0.337079	0.015544	3.52376e-10	89	30	1930	GO:0051049	GO:BP	27205	14219
4	nervous system development	0.382022	0.0133072	4.25918e-10	89	34	2555	GO:0007399	GO:BP	27205	2969
4	regulation of localization	0.348315	0.0135194	4.85946e-09	89	31	2293	GO:0032879	GO:BP	27205	8303
4	response to oxygen-containing compound	0.337079	0.0137552	8.04741e-09	89	30	2181	GO:1901700	GO:BP	27205	22661
4	establishment of localization in cell	0.337079	0.013655	9.67813e-09	89	30	2197	GO:0051649	GO:BP	27205	14650
4	developmental process	0.595506	0.00772032	1.25022e-08	89	53	6865	GO:0032502	GO:BP	27205	8032
4	system development	0.449438	0.00972053	3.40604e-08	89	40	4115	GO:0048731	GO:BP	27205	13728
4	organic substance transport	0.370787	0.011632	4.42475e-08	89	33	2837	GO:0071702	GO:BP	27205	17820
4	positive regulation of transport	0.235955	0.0196262	4.64786e-08	89	21	1070	GO:0051050	GO:BP	27205	14220
4	central nervous system development	0.235955	0.0194986	5.24547e-08	89	21	1077	GO:0007417	GO:BP	27205	2983
4	anatomical structure development	0.550562	0.00786769	9.16729e-08	89	49	6228	GO:0048856	GO:BP	27205	13840
4	aging	0.123596	0.0547264	1.07331e-07	89	11	201	GO:0007568	GO:BP	27205	3117
4	response to organic substance	0.404494	0.0100474	2.4413e-07	89	36	3583	GO:0010033	GO:BP	27205	3923
4	response to stimulus	0.719101	0.00604002	5.01864e-07	89	64	10596	GO:0050896	GO:BP	27205	14092
4	response to nitrogen compound	0.247191	0.0162003	5.62055e-07	89	22	1358	GO:1901698	GO:BP	27205	22659
4	neurogenesis	0.280899	0.0133618	1.49168e-06	89	25	1871	GO:0022008	GO:BP	27205	6923
4	small molecule metabolic process	0.280899	0.0133404	1.54187e-06	89	25	1874	GO:0044281	GO:BP	27205	11589
4	multicellular organism development	0.460674	0.00841371	1.60199e-06	89	41	4873	GO:0007275	GO:BP	27205	2871
4	regulation of cellular component organization	0.325843	0.0112316	2.56358e-06	89	29	2582	GO:0051128	GO:BP	27205	14274
4	nitrogen compound transport	0.292135	0.0123928	3.09082e-06	89	26	2098	GO:0071705	GO:BP	27205	17823
4	response to chemical	0.494382	0.00775194	3.52438e-06	89	44	5676	GO:0042221	GO:BP	27205	10621
4	positive regulation of cellular process	0.505618	0.00750375	5.77233e-06	89	45	5997	GO:0048522	GO:BP	27205	13543
4	monoatomic ion transport	0.224719	0.0156128	7.874e-06	89	20	1281	GO:0006811	GO:BP	27205	2547
4	brain development	0.179775	0.0200753	1.08867e-05	89	16	797	GO:0007420	GO:BP	27205	2986
4	response to stress	0.404494	0.00866218	1.49403e-05	89	36	4156	GO:0006950	GO:BP	27205	2640
4	generation of neurons	0.247191	0.0134887	1.65867e-05	89	22	1631	GO:0048699	GO:BP	27205	13696
4	response to endogenous stimulus	0.269663	0.0122075	2.08349e-05	89	24	1966	GO:0009719	GO:BP	27205	3694
4	organonitrogen compound metabolic process	0.516854	0.00708892	2.20048e-05	89	46	6489	GO:1901564	GO:BP	27205	22563
4	head development	0.179775	0.0188235	2.68519e-05	89	16	850	GO:0060322	GO:BP	27205	15367
4	neuron projection development	0.202247	0.0162162	2.98743e-05	89	18	1110	GO:0031175	GO:BP	27205	7471
4	catabolic process	0.303371	0.0106762	3.38311e-05	89	27	2529	GO:0009056	GO:BP	27205	3308
4	response to organonitrogen compound	0.213483	0.0150674	3.63249e-05	89	19	1261	GO:0010243	GO:BP	27205	4100
4	neuron differentiation	0.235955	0.0135048	3.80268e-05	89	21	1555	GO:0030182	GO:BP	27205	7062
4	neuron development	0.213483	0.0150079	3.86889e-05	89	19	1266	GO:0048666	GO:BP	27205	13664
4	gliogenesis	0.123596	0.0304709	4.99622e-05	89	11	361	GO:0042063	GO:BP	27205	10516
4	cellular response to oxygen-containing compound	0.235955	0.0132159	5.5164e-05	89	21	1589	GO:1901701	GO:BP	27205	22662
4	protein targeting to lysosome involved in chaperone-mediated autophagy	0.0337079	1	6.04374e-05	89	3	3	GO:0061740	GO:BP	27205	16557
4	regulation of signaling	0.359551	0.00896359	6.86384e-05	89	32	3570	GO:0023051	GO:BP	27205	7001
4	regulation of cell communication	0.359551	0.00895355	7.05006e-05	89	32	3574	GO:0010646	GO:BP	27205	4388
4	carbohydrate derivative metabolic process	0.191011	0.0163148	7.26721e-05	89	17	1042	GO:1901135	GO:BP	27205	22199
4	positive regulation of biological process	0.516854	0.00683304	7.36649e-05	89	46	6732	GO:0048518	GO:BP	27205	13539
4	positive regulation of neuron projection development	0.101124	0.0409091	8.13743e-05	89	9	220	GO:0010976	GO:BP	27205	4666
4	positive regulation of signaling	0.258427	0.0118191	8.2577e-05	89	23	1946	GO:0023056	GO:BP	27205	7003
4	positive regulation of cell communication	0.258427	0.011813	8.33578e-05	89	23	1947	GO:0010647	GO:BP	27205	4389
4	monoatomic cation transport	0.191011	0.0159925	9.69063e-05	89	17	1063	GO:0006812	GO:BP	27205	2548
4	negative regulation of protein metabolic process	0.191011	0.0158287	0.000112367	89	17	1074	GO:0051248	GO:BP	27205	14364
4	amino acid transport	0.0898876	0.0487805	0.000122432	89	8	164	GO:0006865	GO:BP	27205	2583
4	positive regulation of cellular component organization	0.202247	0.0144462	0.000171564	89	18	1246	GO:0051130	GO:BP	27205	14276
4	acidic amino acid transport	0.0674157	0.0882353	0.000171595	89	6	68	GO:0015800	GO:BP	27205	5036
4	regulation of protein metabolic process	0.292135	0.0101682	0.000180351	89	26	2557	GO:0051246	GO:BP	27205	14362
4	establishment of protein localization	0.235955	0.0122664	0.00019578	89	21	1712	GO:0045184	GO:BP	27205	12003
4	response to toxic substance	0.101124	0.0367347	0.000204078	89	9	245	GO:0009636	GO:BP	27205	3631
4	protein localization	0.292135	0.0100736	0.00021718	89	26	2581	GO:0008104	GO:BP	27205	3195
4	intracellular transport	0.224719	0.0127307	0.000230818	89	20	1571	GO:0046907	GO:BP	27205	13156
4	cellular macromolecule localization	0.292135	0.0100425	0.000230938	89	26	2589	GO:0070727	GO:BP	27205	17211
4	protein targeting to vacuole involved in autophagy	0.0337079	0.75	0.000241176	89	3	4	GO:0071211	GO:BP	27205	17417
4	transmembrane transport	0.224719	0.0126823	0.000245463	89	20	1577	GO:0055085	GO:BP	27205	15067
4	phosphate-containing compound metabolic process	0.303371	0.00967742	0.00025963	89	27	2790	GO:0006796	GO:BP	27205	2537
4	receptor-mediated endocytosis	0.101124	0.0355731	0.000268059	89	9	253	GO:0006898	GO:BP	27205	2608
4	programmed cell death	0.258427	0.0110737	0.000269307	89	23	2077	GO:0012501	GO:BP	27205	4688
4	cell death	0.269663	0.0106336	0.000285241	89	24	2257	GO:0008219	GO:BP	27205	3218
4	protein transport	0.224719	0.0125235	0.00030069	89	20	1597	GO:0015031	GO:BP	27205	4917
4	glial cell differentiation	0.101124	0.0350195	0.000306138	89	9	257	GO:0010001	GO:BP	27205	3901
4	phosphorus metabolic process	0.303371	0.00959829	0.000306876	89	27	2813	GO:0006793	GO:BP	27205	2534
4	behavior	0.157303	0.0184211	0.000307562	89	14	760	GO:0007610	GO:BP	27205	3139
4	amyloid precursor protein metabolic process	0.0674157	0.08	0.000309955	89	6	75	GO:0042982	GO:BP	27205	11047
4	positive regulation of cell projection organization	0.123596	0.0252874	0.000327973	89	11	435	GO:0031346	GO:BP	27205	7532
4	response to organic cyclic compound	0.191011	0.0146678	0.000332618	89	17	1159	GO:0014070	GO:BP	27205	4755
4	regulation of neuron projection development	0.134831	0.0219378	0.0004024	89	12	547	GO:0010975	GO:BP	27205	4665
4	cell differentiation	0.404494	0.00763521	0.000410842	89	36	4715	GO:0030154	GO:BP	27205	7050
4	cellular response to hormone stimulus	0.146067	0.019697	0.00041507	89	13	660	GO:0032870	GO:BP	27205	8294
4	plasma membrane bounded cell projection organization	0.224719	0.0122474	0.000429809	89	20	1633	GO:0120036	GO:BP	27205	20549
4	cellular developmental process	0.404494	0.00758214	0.000490671	89	36	4748	GO:0048869	GO:BP	27205	13852
4	organic substance catabolic process	0.258427	0.0106927	0.000503385	89	23	2151	GO:1901575	GO:BP	27205	22570
4	macromolecule localization	0.314607	0.00909091	0.000517965	89	28	3080	GO:0033036	GO:BP	27205	8425
4	cell junction organization	0.157303	0.0175439	0.000554433	89	14	798	GO:0034330	GO:BP	27205	9021
4	detoxification	0.0786517	0.0518519	0.000555603	89	7	135	GO:0098754	GO:BP	27205	19924
4	cell projection organization	0.224719	0.0119832	0.000608304	89	20	1669	GO:0030030	GO:BP	27205	7016
4	negative regulation of amyloid-beta formation	0.0449438	0.210526	0.000713329	89	4	19	GO:1902430	GO:BP	27205	23313
4	modulation of chemical synaptic transmission	0.146067	0.0186514	0.000770088	89	13	697	GO:0050804	GO:BP	27205	14016
4	regulation of trans-synaptic signaling	0.146067	0.0186246	0.00078264	89	13	698	GO:0099177	GO:BP	27205	20147
4	ATP metabolic process	0.0786517	0.048951	0.00082133	89	7	143	GO:0046034	GO:BP	27205	12513
4	regulation of synapse organization	0.101124	0.0311419	0.000821469	89	9	289	GO:0050807	GO:BP	27205	14019
4	regulation of synapse structure or activity	0.101124	0.0304054	0.00100316	89	9	296	GO:0050803	GO:BP	27205	14015
4	protein localization to organelle	0.168539	0.0153374	0.00110401	89	15	978	GO:0033365	GO:BP	27205	8610
4	cell projection morphogenesis	0.146067	0.0180556	0.00110944	89	13	720	GO:0048858	GO:BP	27205	13842
4	export from cell	0.168539	0.0153218	0.00111826	89	15	979	GO:0140352	GO:BP	27205	20837
4	cellular component morphogenesis	0.157303	0.0164512	0.00119558	89	14	851	GO:0032989	GO:BP	27205	8397
4	cellular homeostasis	0.157303	0.0163934	0.00124659	89	14	854	GO:0019725	GO:BP	27205	6348
4	organonitrogen compound biosynthetic process	0.224719	0.0114351	0.00127293	89	20	1749	GO:1901566	GO:BP	27205	22565
4	response to hormone	0.168539	0.0151515	0.0012864	89	15	990	GO:0009725	GO:BP	27205	3700
4	negative regulation of amyloid precursor protein catabolic process	0.0449438	0.181818	0.00133617	89	4	22	GO:1902992	GO:BP	27205	23741
4	regulation of plasma membrane bounded cell projection organization	0.146067	0.0175913	0.00148472	89	13	739	GO:0120035	GO:BP	27205	20548
4	cell part morphogenesis	0.146067	0.0173103	0.00177662	89	13	751	GO:0032990	GO:BP	27205	8398
4	monoatomic ion transmembrane transport	0.168539	0.0147638	0.00177803	89	15	1016	GO:0034220	GO:BP	27205	8951
4	regulation of cell projection organization	0.146067	0.0172643	0.00182996	89	13	753	GO:0031344	GO:BP	27205	7530
4	nucleotide metabolic process	0.123596	0.0211132	0.00194053	89	11	521	GO:0009117	GO:BP	27205	3362
4	regulation of epithelial cell migration	0.0898876	0.0338983	0.00196247	89	8	236	GO:0010632	GO:BP	27205	4374
4	generation of precursor metabolites and energy	0.11236	0.0236407	0.00225887	89	10	423	GO:0006091	GO:BP	27205	1998
4	regulation of secretion	0.146067	0.0169271	0.00227783	89	13	768	GO:0051046	GO:BP	27205	14216
4	ATP biosynthetic process	0.0674157	0.0571429	0.00229044	89	6	105	GO:0006754	GO:BP	27205	2506
4	nucleoside phosphate metabolic process	0.123596	0.0207156	0.00233403	89	11	531	GO:0006753	GO:BP	27205	2505
4	purine ribonucleoside triphosphate metabolic process	0.0786517	0.0419162	0.00233413	89	7	167	GO:0009205	GO:BP	27205	3447
4	carbohydrate derivative biosynthetic process	0.134831	0.0184615	0.00247723	89	12	650	GO:1901137	GO:BP	27205	22201
4	animal organ development	0.314607	0.00841852	0.0024823	89	28	3326	GO:0048513	GO:BP	27205	13536
4	regulation of endocytosis	0.101124	0.0271903	0.00253242	89	9	331	GO:0030100	GO:BP	27205	7041
4	intracellular monoatomic ion homeostasis	0.123596	0.0205224	0.00255593	89	11	536	GO:0006873	GO:BP	27205	2587
4	cell morphogenesis	0.168539	0.014313	0.00261215	89	15	1048	GO:0000902	GO:BP	27205	249
4	amino acid transmembrane transport	0.0674157	0.0555556	0.00270214	89	6	108	GO:0003333	GO:BP	27205	1783
4	metal ion transport	0.157303	0.0152838	0.00284657	89	14	916	GO:0030001	GO:BP	27205	7008
4	purine nucleoside triphosphate metabolic process	0.0786517	0.0404624	0.00295465	89	7	173	GO:0009144	GO:BP	27205	3387
4	cellular component organization or biogenesis	0.52809	0.00599872	0.0029618	89	47	7835	GO:0071840	GO:BP	27205	17895
4	ribonucleoside triphosphate metabolic process	0.0786517	0.04	0.0031899	89	7	175	GO:0009199	GO:BP	27205	3441
4	cellular response to chemical stimulus	0.303371	0.0085093	0.00335337	89	27	3173	GO:0070887	GO:BP	27205	17294
4	regulation of endothelial cell migration	0.0786517	0.039548	0.00344062	89	7	177	GO:0010594	GO:BP	27205	4338
4	regulation of secretion by cell	0.134831	0.0178306	0.00355051	89	12	673	GO:1903530	GO:BP	27205	24181
4	proton motive force-driven mitochondrial ATP synthesis	0.0561798	0.0793651	0.00361487	89	5	63	GO:0042776	GO:BP	27205	10938
4	regulation of cellular localization	0.168539	0.0139018	0.00374058	89	15	1079	GO:0060341	GO:BP	27205	15386
4	cellular component organization	0.516854	0.00602567	0.00379342	89	46	7634	GO:0016043	GO:BP	27205	5200
4	purine ribonucleoside triphosphate biosynthetic process	0.0674157	0.0517241	0.00410334	89	6	116	GO:0009206	GO:BP	27205	3448
4	cellular detoxification	0.0674157	0.0517241	0.00410334	89	6	116	GO:1990748	GO:BP	27205	26515
4	organic anion transport	0.11236	0.0220751	0.00416855	89	10	453	GO:0015711	GO:BP	27205	4953
4	energy derivation by oxidation of organic compounds	0.101124	0.0254958	0.00429226	89	9	353	GO:0015980	GO:BP	27205	5183
4	protein folding	0.0786517	0.0382514	0.00429382	89	7	183	GO:0006457	GO:BP	27205	2254
4	purine nucleoside triphosphate biosynthetic process	0.0674157	0.0512821	0.00431386	89	6	117	GO:0009145	GO:BP	27205	3388
4	positive regulation of CoA-transferase activity	0.0337079	0.333333	0.00500496	89	3	9	GO:1905920	GO:BP	27205	26245
4	regulation of CoA-transferase activity	0.0337079	0.333333	0.00500496	89	3	9	GO:1905918	GO:BP	27205	26243
4	organophosphate metabolic process	0.157303	0.0145228	0.00515522	89	14	964	GO:0019637	GO:BP	27205	6280
4	regulation of multicellular organismal process	0.303371	0.00831793	0.00519671	89	27	3246	GO:0051239	GO:BP	27205	14358
4	neuron projection morphogenesis	0.134831	0.0171674	0.00524276	89	12	699	GO:0048812	GO:BP	27205	13798
4	cell-cell signaling	0.213483	0.0108696	0.00538987	89	19	1748	GO:0007267	GO:BP	27205	2864
4	ribonucleoside triphosphate biosynthetic process	0.0674157	0.0491803	0.00550292	89	6	122	GO:0009201	GO:BP	27205	3443
4	purine nucleotide metabolic process	0.11236	0.0213675	0.0055663	89	10	468	GO:0006163	GO:BP	27205	2042
4	proton motive force-driven ATP synthesis	0.0561798	0.0714286	0.00611349	89	5	70	GO:0015986	GO:BP	27205	5185
4	small molecule biosynthetic process	0.123596	0.0187394	0.00612267	89	11	587	GO:0044283	GO:BP	27205	11591
4	endocytosis	0.146067	0.0154578	0.00617191	89	13	841	GO:0006897	GO:BP	27205	2607
4	nucleoside triphosphate metabolic process	0.0786517	0.0360825	0.00631827	89	7	194	GO:0009141	GO:BP	27205	3384
4	regulation of vesicle-mediated transport	0.123596	0.0186441	0.00642758	89	11	590	GO:0060627	GO:BP	27205	15648
4	plasma membrane bounded cell projection morphogenesis	0.134831	0.0168067	0.00651391	89	12	714	GO:0120039	GO:BP	27205	20550
4	positive regulation of endocytosis	0.0786517	0.0358974	0.00653627	89	7	195	GO:0045807	GO:BP	27205	12331
4	nucleobase-containing small molecule metabolic process	0.123596	0.0185811	0.00663817	89	11	592	GO:0055086	GO:BP	27205	15068
4	cellular response to toxic substance	0.0674157	0.0472441	0.00694628	89	6	127	GO:0097237	GO:BP	27205	19590
4	negative regulation of nitrogen compound metabolic process	0.258427	0.00917797	0.00706962	89	23	2506	GO:0051172	GO:BP	27205	14317
4	response to lipid	0.168539	0.0131926	0.00708331	89	15	1137	GO:0033993	GO:BP	27205	8812
4	cellular response to nitrogen compound	0.146067	0.0151515	0.00766876	89	13	858	GO:1901699	GO:BP	27205	22660
4	cellular process	0.94382	0.0040519	0.00818293	89	84	20731	GO:0009987	GO:BP	27205	3889
4	response to lipoprotein particle	0.0449438	0.117647	0.00822091	89	4	34	GO:0055094	GO:BP	27205	15075
4	intracellular protein transport	0.146067	0.0150289	0.00837329	89	13	865	GO:0006886	GO:BP	27205	2598
4	regulation of response to stress	0.191011	0.0115883	0.00844028	89	17	1467	GO:0080134	GO:BP	27205	18808
4	nucleoside triphosphate biosynthetic process	0.0674157	0.0451128	0.00907021	89	6	133	GO:0009142	GO:BP	27205	3385
4	regulation of catalytic activity	0.213483	0.0104741	0.00923126	89	19	1814	GO:0050790	GO:BP	27205	14005
4	carboxylic acid transport	0.101124	0.0230769	0.00963613	89	9	390	GO:0046942	GO:BP	27205	13168
4	organic acid transport	0.101124	0.0229592	0.0100415	89	9	392	GO:0015849	GO:BP	27205	5080
4	cellular response to endogenous stimulus	0.202247	0.0108696	0.0103081	89	18	1656	GO:0071495	GO:BP	27205	17675
4	biological regulation	0.741573	0.00476948	0.0104021	89	66	13838	GO:0065007	GO:BP	27205	16811
4	purine-containing compound metabolic process	0.11236	0.0198413	0.0106885	89	10	504	GO:0072521	GO:BP	27205	18397
4	monoatomic ion homeostasis	0.123596	0.0176282	0.0109336	89	11	624	GO:0050801	GO:BP	27205	14013
4	cellular response to stress	0.224719	0.00992556	0.0111154	89	20	2015	GO:0033554	GO:BP	27205	8724
4	apoptotic process	0.224719	0.00990099	0.0115343	89	20	2020	GO:0006915	GO:BP	27205	2620
4	positive regulation of protein localization	0.11236	0.0195695	0.0120582	89	10	511	GO:1903829	GO:BP	27205	24440
4	chemical synaptic transmission	0.146067	0.0145251	0.0120866	89	13	895	GO:0007268	GO:BP	27205	2865
4	anterograde trans-synaptic signaling	0.146067	0.0145251	0.0120866	89	13	895	GO:0098916	GO:BP	27205	20010
4	regulation of molecular function	0.258427	0.00888031	0.0122551	89	23	2590	GO:0065009	GO:BP	27205	16813
4	ribose phosphate metabolic process	0.101124	0.0223325	0.0125427	89	9	403	GO:0019693	GO:BP	27205	6330
4	cholesterol metabolic process	0.0674157	0.0425532	0.0126943	89	6	141	GO:0008203	GO:BP	27205	3202
4	cellular response to lipoprotein particle stimulus	0.0449438	0.105263	0.0129549	89	4	38	GO:0071402	GO:BP	27205	17600
4	regulation of amyloid-beta formation	0.0449438	0.105263	0.0129549	89	4	38	GO:1902003	GO:BP	27205	22950
4	chaperone-mediated autophagy	0.0337079	0.25	0.0130153	89	3	12	GO:0061684	GO:BP	27205	16525
4	trans-synaptic signaling	0.146067	0.0144124	0.0131388	89	13	902	GO:0099537	GO:BP	27205	20178
4	tissue regeneration	0.0561798	0.0609756	0.013364	89	5	82	GO:0042246	GO:BP	27205	10625
4	negative regulation of multicellular organismal process	0.168539	0.0125104	0.0134157	89	15	1199	GO:0051241	GO:BP	27205	14360
4	regulation of protein stability	0.0898876	0.025974	0.0140396	89	8	308	GO:0031647	GO:BP	27205	7661
4	negative regulation of cellular process	0.382022	0.00683417	0.0141569	89	34	4975	GO:0048523	GO:BP	27205	13544
4	secretion by cell	0.146067	0.0142544	0.0147825	89	13	912	GO:0032940	GO:BP	27205	8354
4	oxidative phosphorylation	0.0674157	0.0410959	0.0155012	89	6	146	GO:0006119	GO:BP	27205	2021
4	intracellular monoatomic cation homeostasis	0.11236	0.0190114	0.0155143	89	10	526	GO:0030003	GO:BP	27205	7010
4	epithelial cell migration	0.0898876	0.0255591	0.0157831	89	8	313	GO:0010631	GO:BP	27205	4373
4	inorganic ion transmembrane transport	0.146067	0.0141612	0.0158536	89	13	918	GO:0098660	GO:BP	27205	19866
4	carboxylic acid biosynthetic process	0.0898876	0.0253968	0.01653	89	8	315	GO:0046394	GO:BP	27205	12826
4	synapse organization	0.11236	0.0188324	0.0168424	89	10	531	GO:0050808	GO:BP	27205	14020
4	positive regulation of phospholipid transport	0.0337079	0.230769	0.0168798	89	3	13	GO:2001140	GO:BP	27205	27646
4	epithelium migration	0.0898876	0.0253165	0.0169145	89	8	316	GO:0090132	GO:BP	27205	19055
4	sterol metabolic process	0.0674157	0.0402685	0.0174136	89	6	149	GO:0016125	GO:BP	27205	5267
4	regulation of anatomical structure morphogenesis	0.146067	0.0139935	0.0179968	89	13	929	GO:0022603	GO:BP	27205	6973
4	organic acid biosynthetic process	0.0898876	0.0250784	0.0181136	89	8	319	GO:0016053	GO:BP	27205	5208
4	multicellular organismal process	0.561798	0.00546329	0.0184521	89	50	9152	GO:0032501	GO:BP	27205	8031
4	amide transport	0.101124	0.0212766	0.0184717	89	9	423	GO:0042886	GO:BP	27205	11011
4	endothelial cell migration	0.0786517	0.0305677	0.0187118	89	7	229	GO:0043542	GO:BP	27205	11351
4	positive regulation of neurofibrillary tangle assembly	0.0224719	1	0.0188974	89	2	2	GO:1902998	GO:BP	27205	23747
4	tissue migration	0.0898876	0.0248447	0.0193837	89	8	322	GO:0090130	GO:BP	27205	19053
4	secondary alcohol metabolic process	0.0674157	0.0394737	0.0195126	89	6	152	GO:1902652	GO:BP	27205	23465
4	secretion	0.157303	0.0129151	0.019633	89	14	1084	GO:0046903	GO:BP	27205	13155
4	learning or memory	0.0898876	0.0246914	0.0202715	89	8	324	GO:0007611	GO:BP	27205	3140
4	ribose phosphate biosynthetic process	0.0786517	0.0301724	0.0203599	89	7	232	GO:0046390	GO:BP	27205	12823
4	synaptic signaling	0.146067	0.0138151	0.0206229	89	13	941	GO:0099536	GO:BP	27205	20177
4	cellular response to stimulus	0.550562	0.00550067	0.0207723	89	49	8908	GO:0051716	GO:BP	27205	14697
4	regulation of phospholipid transport	0.0337079	0.214286	0.0214325	89	3	14	GO:2001138	GO:BP	27205	27644
4	regulation of biological process	0.719101	0.00476758	0.0219543	89	64	13424	GO:0050789	GO:BP	27205	14004
4	positive regulation of synaptic transmission	0.0898876	0.0243902	0.0221504	89	8	328	GO:0050806	GO:BP	27205	14018
4	MAPK cascade	0.134831	0.0148699	0.0223689	89	12	807	GO:0000165	GO:BP	27205	59
4	response to inorganic substance	0.123596	0.0163205	0.0225024	89	11	674	GO:0010035	GO:BP	27205	3925
4	inorganic cation transmembrane transport	0.134831	0.0148515	0.022646	89	12	808	GO:0098662	GO:BP	27205	19868
4	inorganic ion homeostasis	0.11236	0.0180505	0.0242978	89	10	554	GO:0098771	GO:BP	27205	19937
4	cellular catabolic process	0.179775	0.0112281	0.0248311	89	16	1425	GO:0044248	GO:BP	27205	11576
4	negative regulation of endothelial cell proliferation	0.0449438	0.0888889	0.0256964	89	4	45	GO:0001937	GO:BP	27205	566
4	regulation of amyloid precursor protein catabolic process	0.0449438	0.0888889	0.0256964	89	4	45	GO:1902991	GO:BP	27205	23740
4	negative regulation of glycoprotein metabolic process	0.0337079	0.2	0.0267272	89	3	15	GO:1903019	GO:BP	27205	23768
4	cellular oxidant detoxification	0.0561798	0.0520833	0.0288809	89	5	96	GO:0098869	GO:BP	27205	19981
4	memory	0.0674157	0.0368098	0.029032	89	6	163	GO:0007613	GO:BP	27205	3142
4	carboxylic acid transmembrane transport	0.0674157	0.0368098	0.029032	89	6	163	GO:1905039	GO:BP	27205	25494
4	organic substance biosynthetic process	0.41573	0.00630861	0.0293881	89	37	5865	GO:1901576	GO:BP	27205	22571
4	cell development	0.280899	0.00796432	0.0294048	89	25	3139	GO:0048468	GO:BP	27205	13507
4	organic acid transmembrane transport	0.0674157	0.0365854	0.030056	89	6	164	GO:1903825	GO:BP	27205	24437
4	protein localization to lysosome	0.0449438	0.0851064	0.0306086	89	4	47	GO:0061462	GO:BP	27205	16402
4	regulation of response to wounding	0.0674157	0.0363636	0.0311089	89	6	165	GO:1903034	GO:BP	27205	23781
4	regulation of hydrolase activity	0.146067	0.0132789	0.0313065	89	13	979	GO:0051336	GO:BP	27205	14432
4	response to wounding	0.11236	0.0175131	0.0314977	89	10	571	GO:0009611	GO:BP	27205	3616
4	amyloid-beta formation	0.0449438	0.0833333	0.033308	89	4	48	GO:0034205	GO:BP	27205	8945
4	dicarboxylic acid transport	0.0561798	0.0505051	0.0335353	89	5	99	GO:0006835	GO:BP	27205	2561
4	monoatomic cation transmembrane transport	0.134831	0.0142687	0.033653	89	12	841	GO:0098655	GO:BP	27205	19861
4	regulation of glycoprotein metabolic process	0.0449438	0.0816327	0.0361783	89	4	49	GO:1903018	GO:BP	27205	23767
4	regulation of response to stimulus	0.325843	0.0071499	0.0391228	89	29	4056	GO:0048583	GO:BP	27205	13594
4	negative regulation of platelet activation	0.0337079	0.176471	0.0397551	89	3	17	GO:0010544	GO:BP	27205	4298
4	L-glutamate import across plasma membrane	0.0337079	0.176471	0.0397551	89	3	17	GO:0098712	GO:BP	27205	19893
4	anatomical structure morphogenesis	0.258427	0.0082526	0.040487	89	23	2787	GO:0009653	GO:BP	27205	3648
4	vesicle-mediated transport	0.191011	0.0102595	0.0412413	89	17	1657	GO:0016192	GO:BP	27205	5292
4	regulation of cell death	0.202247	0.00980392	0.0417917	89	18	1836	GO:0010941	GO:BP	27205	4635
4	negative regulation of peptidase activity	0.0786517	0.0269231	0.0424089	89	7	260	GO:0010466	GO:BP	27205	4249
4	biosynthetic process	0.41573	0.00620805	0.0427893	89	37	5960	GO:0009058	GO:BP	27205	3310
4	cognition	0.0898876	0.0222222	0.0431873	89	8	360	GO:0050890	GO:BP	27205	14087
4	response to external stimulus	0.280899	0.00778331	0.0436038	89	25	3212	GO:0009605	GO:BP	27205	3610
4	regulation of programmed cell death	0.191011	0.0102102	0.0438529	89	17	1665	GO:0043067	GO:BP	27205	11095
4	negative regulation of hydrolase activity	0.0898876	0.0221607	0.0440493	89	8	361	GO:0051346	GO:BP	27205	14442
4	response to abiotic stimulus	0.168539	0.0112867	0.0450451	89	15	1329	GO:0009628	GO:BP	27205	3626
4	skeletal muscle tissue regeneration	0.0449438	0.0769231	0.0458823	89	4	52	GO:0043403	GO:BP	27205	11262
4	cellular respiration	0.0786517	0.0265152	0.046756	89	7	264	GO:0045333	GO:BP	27205	12059
4	removal of superoxide radicals	0.0337079	0.166667	0.0475932	89	3	18	GO:0019430	GO:BP	27205	6090
4	negative regulation of biological process	0.41573	0.00616667	0.049968	89	37	6000	GO:0048519	GO:BP	27205	13540
4	cytoplasm	0.851064	0.00688468	4.99673e-15	94	80	11620	GO:0005737	GO:CC	27262	309
4	endomembrane system	0.521277	0.0114433	8.1069e-14	94	49	4282	GO:0012505	GO:CC	27262	689
4	synapse	0.340426	0.0190817	1.19119e-13	94	32	1677	GO:0045202	GO:CC	27262	2147
4	endoplasmic reticulum	0.351064	0.0174234	4.9921e-13	94	33	1894	GO:0005783	GO:CC	27262	348
4	organelle membrane	0.446809	0.0127273	1.04165e-12	94	42	3300	GO:0031090	GO:CC	27262	1048
4	cell junction	0.37234	0.0152572	2.85801e-12	94	35	2294	GO:0030054	GO:CC	27262	871
4	neuron projection	0.319149	0.0183711	3.54905e-12	94	30	1633	GO:0043005	GO:CC	27262	1851
4	vesicle	0.361702	0.0151854	9.16342e-12	94	34	2239	GO:0031982	GO:CC	27262	1231
4	axon	0.223404	0.0264151	8.15412e-11	94	21	795	GO:0030424	GO:CC	27262	935
4	myelin sheath	0.138298	0.0619048	1.15109e-10	94	13	210	GO:0043209	GO:CC	27262	1877
4	membrane	0.744681	0.00678952	1.46786e-10	94	70	10310	GO:0016020	GO:CC	27262	722
4	cytoplasmic vesicle	0.329787	0.0148681	3.21627e-10	94	31	2085	GO:0031410	GO:CC	27262	1109
4	intracellular vesicle	0.329787	0.0148467	3.33976e-10	94	31	2088	GO:0097708	GO:CC	27262	3146
4	somatodendritic compartment	0.244681	0.0205357	9.07162e-10	94	23	1120	GO:0036477	GO:CC	27262	1724
4	plasma membrane bounded cell projection	0.351064	0.0131108	1.47639e-09	94	33	2517	GO:0120025	GO:CC	27262	3453
4	cell projection	0.351064	0.0126099	4.2448e-09	94	33	2617	GO:0042995	GO:CC	27262	1850
4	dendritic spine	0.12766	0.0533333	5.59887e-09	94	12	225	GO:0043197	GO:CC	27262	1872
4	neuron spine	0.12766	0.0519481	7.61034e-09	94	12	231	GO:0044309	GO:CC	27262	2068
4	lytic vacuole	0.170213	0.0291439	1.81681e-08	94	16	549	GO:0000323	GO:CC	27262	53
4	lysosome	0.170213	0.0291439	1.81681e-08	94	16	549	GO:0005764	GO:CC	27262	332
4	presynapse	0.191489	0.0241935	2.13114e-08	94	18	744	GO:0098793	GO:CC	27262	3265
4	vacuole	0.180851	0.0262751	2.15279e-08	94	17	647	GO:0005773	GO:CC	27262	340
4	melanosome	0.0957447	0.0865385	2.7925e-08	94	9	104	GO:0042470	GO:CC	27262	1789
4	pigment granule	0.0957447	0.0865385	2.7925e-08	94	9	104	GO:0048770	GO:CC	27262	2248
4	postsynapse	0.202128	0.02194	3.10009e-08	94	19	866	GO:0098794	GO:CC	27262	3266
4	dendrite	0.191489	0.0224719	7.00311e-08	94	18	801	GO:0030425	GO:CC	27262	936
4	dendritic tree	0.191489	0.0224159	7.28866e-08	94	18	803	GO:0097447	GO:CC	27262	3014
4	cell periphery	0.56383	0.00751986	9.358e-08	94	53	7048	GO:0071944	GO:CC	27262	2801
4	cell surface	0.212766	0.0175593	4.53715e-07	94	20	1139	GO:0009986	GO:CC	27262	663
4	perinuclear region of cytoplasm	0.180851	0.0212235	5.5613e-07	94	17	801	GO:0048471	GO:CC	27262	2238
4	bounding membrane of organelle	0.255319	0.0140598	6.62884e-07	94	24	1707	GO:0098588	GO:CC	27262	3225
4	glutamatergic synapse	0.159574	0.0245902	7.74211e-07	94	15	610	GO:0098978	GO:CC	27262	3325
4	rough endoplasmic reticulum	0.0851064	0.0754717	9.63524e-07	94	8	106	GO:0005791	GO:CC	27262	356
4	cell body	0.180851	0.0204327	9.80798e-07	94	17	832	GO:0044297	GO:CC	27262	2056
4	neuronal cell body	0.170213	0.0214477	1.51722e-06	94	16	746	GO:0043025	GO:CC	27262	1853
4	mitochondrion	0.265957	0.0128139	1.86188e-06	94	25	1951	GO:0005739	GO:CC	27262	310
4	cellular anatomical entity	1	0.00412353	1.37576e-05	94	94	22796	GO:0110165	GO:CC	27262	3449
4	plasma membrane region	0.212766	0.0140845	1.81523e-05	94	20	1420	GO:0098590	GO:CC	27262	3226
4	mitochondrial membrane	0.159574	0.0192802	1.94233e-05	94	15	778	GO:0031966	GO:CC	27262	1217
4	organelle envelope	0.202128	0.0147059	2.10024e-05	94	19	1292	GO:0031967	GO:CC	27262	1218
4	envelope	0.202128	0.0147059	2.10024e-05	94	19	1292	GO:0031975	GO:CC	27262	1225
4	distal axon	0.117021	0.0282051	3.04341e-05	94	11	390	GO:0150034	GO:CC	27262	3593
4	plasma membrane	0.489362	0.00700472	4.15501e-05	94	46	6567	GO:0005886	GO:CC	27262	424
4	mitochondrial envelope	0.159574	0.0179211	4.98545e-05	94	15	837	GO:0005740	GO:CC	27262	311
4	organelle subcompartment	0.202128	0.0137581	5.8989e-05	94	19	1381	GO:0031984	GO:CC	27262	1233
4	Golgi apparatus	0.212766	0.0130634	6.12082e-05	94	20	1531	GO:0005794	GO:CC	27262	358
4	extracellular space	0.244681	0.0114885	6.29325e-05	94	23	2002	GO:0005615	GO:CC	27262	232
4	extracellular region	0.287234	0.0100223	6.74275e-05	94	27	2694	GO:0005576	GO:CC	27262	198
4	late endosome	0.0957447	0.0332103	0.000120703	94	9	271	GO:0005770	GO:CC	27262	338
4	intracellular anatomical structure	0.87234	0.00468438	0.000129772	94	82	17505	GO:0005622	GO:CC	27262	237
4	neuron projection terminus	0.0851064	0.0394089	0.000151353	94	8	203	GO:0044306	GO:CC	27262	2065
4	collagen-containing extracellular matrix	0.106383	0.0266667	0.000199311	94	10	375	GO:0062023	GO:CC	27262	2367
4	synaptic membrane	0.117021	0.0226804	0.000263663	94	11	485	GO:0097060	GO:CC	27262	2907
4	secretory vesicle	0.138298	0.0182841	0.000286293	94	13	711	GO:0099503	GO:CC	27262	3373
4	membrane-bounded organelle	0.787234	0.00493564	0.000385114	94	74	14993	GO:0043227	GO:CC	27262	1884
4	extracellular matrix	0.117021	0.0217391	0.000398082	94	11	506	GO:0031012	GO:CC	27262	1031
4	external encapsulating structure	0.117021	0.0216535	0.000413583	94	11	508	GO:0030312	GO:CC	27262	930
4	extracellular exosome	0.0638298	0.0588235	0.000421432	94	6	102	GO:0070062	GO:CC	27262	2425
4	transport vesicle	0.106383	0.0240964	0.000496491	94	10	415	GO:0030133	GO:CC	27262	912
4	multivesicular body	0.0531915	0.0833333	0.000587893	94	5	60	GO:0005771	GO:CC	27262	339
4	mitochondrial inner membrane	0.117021	0.0202952	0.000771808	94	11	542	GO:0005743	GO:CC	27262	314
4	organelle	0.819149	0.00474752	0.000772511	94	77	16219	GO:0043226	GO:CC	27262	1883
4	extracellular vesicle	0.0638298	0.0517241	0.000893411	94	6	116	GO:1903561	GO:CC	27262	3675
4	axon terminus	0.0744681	0.0378378	0.00105158	94	7	185	GO:0043679	GO:CC	27262	1964
4	endoplasmic reticulum subcompartment	0.159574	0.0138889	0.00119484	94	15	1080	GO:0098827	GO:CC	27262	3278
4	extracellular organelle	0.0638298	0.0487805	0.00125497	94	6	123	GO:0043230	GO:CC	27262	1887
4	extracellular membrane-bounded organelle	0.0638298	0.0487805	0.00125497	94	6	123	GO:0065010	GO:CC	27262	2405
4	intracellular membrane-bounded organelle	0.755319	0.00489048	0.00199667	94	71	14518	GO:0043231	GO:CC	27262	1888
4	organelle inner membrane	0.117021	0.0182421	0.00212311	94	11	603	GO:0019866	GO:CC	27262	826
4	smooth endoplasmic reticulum	0.0425532	0.108108	0.00229202	94	4	37	GO:0005790	GO:CC	27262	355
4	membrane raft	0.0957447	0.0223881	0.00303475	94	9	402	GO:0045121	GO:CC	27262	2137
4	membrane microdomain	0.0957447	0.0223325	0.00309535	94	9	403	GO:0098857	GO:CC	27262	3298
4	lysosomal matrix	0.0212766	1	0.0033608	94	2	2	GO:1990836	GO:CC	27262	4014
4	cytosol	0.329787	0.00751151	0.00344166	94	31	4127	GO:0005829	GO:CC	27262	380
4	glial cell projection	0.0425532	0.097561	0.00347759	94	4	41	GO:0097386	GO:CC	27262	2987
4	presynaptic membrane	0.0744681	0.0311111	0.00377944	94	7	225	GO:0042734	GO:CC	27262	1839
4	inner mitochondrial membrane protein complex	0.0638298	0.04	0.00391899	94	6	150	GO:0098800	GO:CC	27262	3271
4	vacuolar membrane	0.0851064	0.0250784	0.0042781	94	8	319	GO:0005774	GO:CC	27262	341
4	endoplasmic reticulum membrane	0.148936	0.0130354	0.00525976	94	14	1074	GO:0005789	GO:CC	27262	354
4	endosome	0.138298	0.0137131	0.00637484	94	13	948	GO:0005768	GO:CC	27262	336
4	intracellular organelle	0.787234	0.00465672	0.00671762	94	74	15891	GO:0043229	GO:CC	27262	1886
4	nuclear outer membrane-endoplasmic reticulum membrane network	0.148936	0.0126812	0.00712821	94	14	1104	GO:0042175	GO:CC	27262	1782
4	synaptic vesicle	0.0744681	0.0271318	0.00909546	94	7	258	GO:0008021	GO:CC	27262	488
4	lytic vacuole membrane	0.0744681	0.0265152	0.0105262	94	7	264	GO:0098852	GO:CC	27262	3294
4	lysosomal membrane	0.0744681	0.0265152	0.0105262	94	7	264	GO:0005765	GO:CC	27262	333
4	exocytic vesicle	0.0744681	0.0252708	0.0142667	94	7	277	GO:0070382	GO:CC	27262	2478
4	cytoplasmic vesicle membrane	0.12766	0.0136209	0.014441	94	12	881	GO:0030659	GO:CC	27262	951
4	astrocyte projection	0.0319149	0.136364	0.0166558	94	3	22	GO:0097449	GO:CC	27262	3016
4	vesicle membrane	0.12766	0.013289	0.0182825	94	12	903	GO:0012506	GO:CC	27262	690
4	membrane protein complex	0.148936	0.0116086	0.0185824	94	14	1206	GO:0098796	GO:CC	27262	3267
4	oxidoreductase complex	0.0531915	0.0409836	0.0188582	94	5	122	GO:1990204	GO:CC	27262	3808
4	growth cone	0.0638298	0.0272727	0.033225	94	6	220	GO:0030426	GO:CC	27262	937
4	multivesicular body, internal vesicle	0.0212766	0.4	0.0333818	94	2	5	GO:0097487	GO:CC	27262	3035
4	mitochondrial proton-transporting ATP synthase complex, catalytic sector F(1)	0.0212766	0.4	0.0333818	94	2	5	GO:0000275	GO:CC	27262	43
4	late endosome membrane	0.0531915	0.0362319	0.0337681	94	5	138	GO:0031902	GO:CC	27262	1200
4	site of polarized growth	0.0638298	0.0264317	0.0394133	94	6	227	GO:0030427	GO:CC	27262	938
4	postsynaptic membrane	0.0744681	0.0210843	0.0440533	94	7	332	GO:0045211	GO:CC	27262	2148
4	endosome membrane	0.0851064	0.0179372	0.0448794	94	8	446	GO:0010008	GO:CC	27262	667
4	sarcoplasmic reticulum lumen	0.0212766	0.333333	0.0499601	94	2	6	GO:0033018	GO:CC	27262	1359
4	proton-transporting ATP synthase complex, catalytic core F(1)	0.0212766	0.333333	0.0499601	94	2	6	GO:0045261	GO:CC	27262	2168
4	protein binding	0.752941	0.00610047	1.44201e-07	85	64	10491	GO:0005515	GO:MF	25177	1496
4	enzyme binding	0.305882	0.0112408	1.08417e-05	85	26	2313	GO:0019899	GO:MF	25177	3754
4	protein-containing complex binding	0.247059	0.0134443	1.76366e-05	85	21	1562	GO:0044877	GO:MF	25177	6099
4	identical protein binding	0.294118	0.0107112	5.66364e-05	85	25	2334	GO:0042802	GO:MF	25177	5683
4	binding	0.894118	0.00466372	9.00172e-05	85	76	16296	GO:0005488	GO:MF	25177	1484
4	amide binding	0.129412	0.0257009	0.000100983	85	11	428	GO:0033218	GO:MF	25177	4543
4	unfolded protein binding	0.0705882	0.0645161	0.000362197	85	6	93	GO:0051082	GO:MF	25177	8018
4	amino acid:sodium symporter activity	0.0470588	0.181818	0.000410099	85	4	22	GO:0005283	GO:MF	25177	1397
4	amino acid:monoatomic cation symporter activity	0.0470588	0.148148	0.000971321	85	4	27	GO:0005416	GO:MF	25177	1464
4	amyloid-beta binding	0.0588235	0.0769231	0.00133143	85	5	65	GO:0001540	GO:MF	25177	195
4	peroxiredoxin activity	0.0352941	0.3	0.00212666	85	3	10	GO:0051920	GO:MF	25177	8140
4	solute:sodium symporter activity	0.0588235	0.0657895	0.00289262	85	5	76	GO:0015370	GO:MF	25177	2512
4	organic acid:sodium symporter activity	0.0470588	0.111111	0.00318555	85	4	36	GO:0005343	GO:MF	25177	1430
4	transporter activity	0.176471	0.0128205	0.00381747	85	15	1170	GO:0005215	GO:MF	25177	1358
4	endopeptidase inhibitor activity	0.0823529	0.0324074	0.00421837	85	7	216	GO:0004866	GO:MF	25177	1139
4	peptidase inhibitor activity	0.0823529	0.03125	0.00534357	85	7	224	GO:0030414	GO:MF	25177	3954
4	ADP binding	0.0470588	0.0952381	0.00596045	85	4	42	GO:0043531	GO:MF	25177	5813
4	small molecule binding	0.270588	0.00874192	0.0067179	85	23	2631	GO:0036094	GO:MF	25177	5430
4	endopeptidase regulator activity	0.0823529	0.0299145	0.0070895	85	7	234	GO:0061135	GO:MF	25177	8483
4	enzyme inhibitor activity	0.105882	0.0208817	0.00735644	85	9	431	GO:0004857	GO:MF	25177	1131
4	peptide binding	0.0941176	0.0236686	0.00924282	85	8	338	GO:0042277	GO:MF	25177	5621
4	solute:monoatomic cation symporter activity	0.0588235	0.0471698	0.014658	85	5	106	GO:0015294	GO:MF	25177	2470
4	peptidase regulator activity	0.0823529	0.0258303	0.0181465	85	7	271	GO:0061134	GO:MF	25177	8482
4	signaling receptor binding	0.2	0.0100059	0.0219661	85	17	1699	GO:0005102	GO:MF	25177	1281
4	active transmembrane transporter activity	0.0941176	0.0199501	0.0309675	85	8	401	GO:0022804	GO:MF	25177	3792
4	high-affinity L-glutamate transmembrane transporter activity	0.0235294	0.5	0.0326648	85	2	4	GO:0005314	GO:MF	25177	1415
4	serine-type endopeptidase inhibitor activity	0.0588235	0.0390625	0.0361088	85	5	128	GO:0004867	GO:MF	25177	1140
4	low-density lipoprotein particle receptor binding	0.0352941	0.115385	0.0443124	85	3	26	GO:0050750	GO:MF	25177	7974
4	active monoatomic ion transmembrane transporter activity	0.0705882	0.0276498	0.0460741	85	6	217	GO:0022853	GO:MF	25177	3816
4	Cerebral amyloid angiopathy	0.09375	0.6	0.00294109	32	3	5	HP:0011970	HP	4965	8372
4	Mental deterioration	0.34375	0.0329341	0.00473265	32	11	334	HP:0001268	HP	4965	965
4	Dementia	0.25	0.0451977	0.0137219	32	8	177	HP:0000726	HP	4965	565
4	Oxidative phosphorylation	0.107143	0.0451128	0.0139191	56	6	133	KEGG:00190	KEGG	8947	18
4	Lysosome	0.107143	0.0444444	0.0151037	56	6	135	KEGG:04142	KEGG	8947	274
4	Diabetic cardiomyopathy	0.125	0.0343137	0.0212703	56	7	204	KEGG:05415	KEGG	8947	485
4	Chemical carcinogenesis - reactive oxygen species	0.125	0.0318182	0.0336624	56	7	220	KEGG:05208	KEGG	8947	453
4	Metabolic pathways	0.375	0.0130435	0.0350331	56	21	1610	KEGG:01100	KEGG	8947	181
4	Huntington disease	0.142857	0.0266667	0.0416506	56	8	300	KEGG:05016	KEGG	8947	407
4	Astrocytic Glutamate-Glutamine Uptake And Metabolism	0.0434783	0.75	0.000604137	69	3	4	REAC:R-MMU-210455	REAC	8362	136
4	Neurotransmitter uptake and metabolism In glial cells	0.0434783	0.75	0.000604137	69	3	4	REAC:R-MMU-112313	REAC	8362	926
4	Platelet degranulation	0.115942	0.0727273	0.000842294	69	8	110	REAC:R-MMU-114608	REAC	8362	1054
4	Response to elevated platelet cytosolic Ca2+	0.115942	0.0701754	0.00110227	69	8	114	REAC:R-MMU-76005	REAC	8362	1290
4	Scavenging by Class A Receptors	0.0434783	0.428571	0.0051929	69	3	7	REAC:R-MMU-3000480	REAC	8362	1347
4	Neurotransmitter release cycle	0.0724638	0.108696	0.00984033	69	5	46	REAC:R-MMU-112310	REAC	8362	925
4	Factor: E2F; motif: TTTSGCGSG	0.515789	0.00894324	2.97485e-05	95	49	5479	TF:M00939	TF	21866	780
4	Factor: E2F; motif: NCSCGCSAAAN	0.484211	0.00881564	0.000189429	95	46	5218	TF:M00919	TF	21866	778
4	Factor: ZF5; motif: GSGCGCGR	0.905263	0.00578346	0.000236135	95	86	14870	TF:M00716	TF	21866	3824
4	Factor: FOXN4; motif: NNWANNCGWMCGCGTCNNNNMT	0.936842	0.00555174	0.000436318	95	89	16031	TF:M04662	TF	21866	1156
4	Factor: ZF5; motif: NRNGNGCGCGCWN	0.884211	0.00578951	0.000803741	95	84	14509	TF:M00333	TF	21866	3826
4	Factor: E2F-3; motif: GGCGGGN	0.757895	0.00636999	0.00138422	95	72	11303	TF:M02089	TF	21866	752
4	Factor: E2F-1; motif: NNNSSCGCSAANN	0.652632	0.00685007	0.00262067	95	62	9051	TF:M07250	TF	21866	736
4	Factor: E2F; motif: NKCGCGCSAAAN	0.431579	0.00842062	0.00525589	95	41	4869	TF:M00920	TF	21866	784
4	Factor: FOXN4; motif: NNWANNCGWMCGCGTCNNNNMT; match class: 1	0.8	0.00593611	0.00905523	95	76	12803	TF:M04662_1	TF	21866	1157
4	Factor: E2F; motif: TTTSGCGSG	0.421053	0.00830048	0.0108505	95	40	4819	TF:M00918	TF	21866	776
4	Factor: E2F-4; motif: NTTTCSCGCC	0.705263	0.00632433	0.0122443	95	67	10594	TF:M07380	TF	21866	760
4	Factor: ZF5; motif: GSGCGCGR; match class: 1	0.768421	0.00603555	0.0124236	95	73	12095	TF:M00716_1	TF	21866	3825
4	Factor: E2F-1; motif: GNGGGCGGGRMN	0.852632	0.00567426	0.012534	95	81	14275	TF:M10209	TF	21866	728
4	Factor: E2F-1; motif: TTTSGCGCGMNR	0.484211	0.00764882	0.0133314	95	46	6014	TF:M00516	TF	21866	772
4	Factor: Sp1; motif: CCCCGCCCCN	0.621053	0.00671217	0.0153517	95	59	8790	TF:M00933	TF	21866	3228
4	Factor: GKLF; motif: NNNRGGNGNGGSN	0.884211	0.0054741	0.0253958	95	84	15345	TF:M07289	TF	21866	1350
4	Factor: BEN; motif: CAGCGRNV; match class: 1	0.757895	0.00598653	0.025607	95	72	12027	TF:M01240_1	TF	21866	279
4	Factor: E2F-1; motif: TTTSGCGS	0.473684	0.007495	0.0318593	95	45	6004	TF:M00431	TF	21866	740
4	Factor: IRF4; motif: NNNAYTCTCGGWNNN	0.852632	0.00556166	0.0380415	95	81	14564	TF:M02872	TF	21866	1748
4	Dravet syndrome: Scn1a-A1783V point mutation model	0.111111	0.0694444	0.0264674	45	5	72	WP:WP5298	WP	4531	8
5	extrinsic component of organelle membrane	0.333333	0.0322581	0.016715	6	2	62	GO:0031312	GO:CC	27262	1092
5	myosin-light-chain-phosphatase activity	0.2	1	0.049898	5	1	1	GO:0050115	GO:MF	25177	7455
5	Enlarged posterior fossa	1	0.0172414	0.0289918	3	3	174	HP:0005445	HP	4965	3688
5	Abnormal posterior cranial fossa morphology	1	0.015	0.0441266	3	3	200	HP:0000932	HP	4965	730
7	Cytochrome c oxidase, mitochondrial	0.155556	0.583333	2.67377e-06	45	7	12	CORUM:538	CORUM	1082	91
7	Parvulin-associated pre-rRNP complex	0.244444	0.23913	2.47226e-05	45	11	46	CORUM:3047	CORUM	1082	332
7	Profilin 2 complex	0.0888889	0.5	0.00477388	45	4	8	CORUM:2835	CORUM	1082	281
7	Respiratory chain complex I, mitochondrial	0.155556	0.2	0.0109847	45	7	35	CORUM:381	CORUM	1082	59
7	Respiratory chain complex I, mitochondrial	0.155556	0.189189	0.0157862	45	7	37	CORUM:382	CORUM	1082	60
7	Metallothionein-3 complex	0.0666667	0.5	0.036279	45	3	6	CORUM:676	CORUM	1082	103
7	cytoplasmic translation	0.188679	0.191083	7.48404e-34	159	30	157	GO:0002181	GO:BP	27205	746
7	oxidative phosphorylation	0.150943	0.164384	7.3001e-25	159	24	146	GO:0006119	GO:BP	27205	2021
7	aerobic respiration	0.163522	0.129353	2.55126e-24	159	26	201	GO:0009060	GO:BP	27205	3312
7	organonitrogen compound biosynthetic process	0.345912	0.0314465	6.53519e-23	159	55	1749	GO:1901566	GO:BP	27205	22565
7	peptide metabolic process	0.257862	0.0463801	3.20526e-22	159	41	884	GO:0006518	GO:BP	27205	2293
7	translation	0.238994	0.0512821	7.07275e-22	159	38	741	GO:0006412	GO:BP	27205	2221
7	peptide biosynthetic process	0.238994	0.0496732	2.20082e-21	159	38	765	GO:0043043	GO:BP	27205	11074
7	cellular respiration	0.163522	0.0984848	3.44007e-21	159	26	264	GO:0045333	GO:BP	27205	12059
7	energy derivation by oxidation of organic compounds	0.169811	0.0764873	3.58743e-19	159	27	353	GO:0015980	GO:BP	27205	5183
7	amide biosynthetic process	0.238994	0.0427447	4.35228e-19	159	38	889	GO:0043604	GO:BP	27205	11391
7	generation of precursor metabolites and energy	0.176101	0.0661939	2.82303e-18	159	28	423	GO:0006091	GO:BP	27205	1998
7	amide metabolic process	0.257862	0.0350128	1.16407e-17	159	41	1171	GO:0043603	GO:BP	27205	11390
7	organonitrogen compound metabolic process	0.584906	0.0143319	1.46386e-17	159	93	6489	GO:1901564	GO:BP	27205	22563
7	translation at postsynapse	0.0880503	0.291667	2.04888e-17	159	14	48	GO:0140242	GO:BP	27205	20801
7	translation at synapse	0.0880503	0.291667	2.04888e-17	159	14	48	GO:0140241	GO:BP	27205	20800
7	proton motive force-driven ATP synthesis	0.0943396	0.214286	1.47265e-16	159	15	70	GO:0015986	GO:BP	27205	5185
7	cellular nitrogen compound biosynthetic process	0.490566	0.0161057	3.07565e-16	159	78	4843	GO:0044271	GO:BP	27205	11584
7	ATP metabolic process	0.113208	0.125874	6.74098e-16	159	18	143	GO:0046034	GO:BP	27205	12513
7	translation at presynapse	0.081761	0.276596	1.11268e-15	159	13	47	GO:0140236	GO:BP	27205	20796
7	ATP biosynthetic process	0.100629	0.152381	2.8608e-15	159	16	105	GO:0006754	GO:BP	27205	2506
7	cellular biosynthetic process	0.509434	0.0147972	7.22148e-15	159	81	5474	GO:0044249	GO:BP	27205	11577
7	purine ribonucleoside triphosphate metabolic process	0.113208	0.107784	1.15451e-14	159	18	167	GO:0009205	GO:BP	27205	3447
7	purine ribonucleoside triphosphate biosynthetic process	0.100629	0.137931	1.5033e-14	159	16	116	GO:0009206	GO:BP	27205	3448
7	purine nucleoside triphosphate biosynthetic process	0.100629	0.136752	1.73281e-14	159	16	117	GO:0009145	GO:BP	27205	3388
7	purine nucleoside triphosphate metabolic process	0.113208	0.104046	2.18918e-14	159	18	173	GO:0009144	GO:BP	27205	3387
7	ribonucleoside triphosphate metabolic process	0.113208	0.102857	2.69496e-14	159	18	175	GO:0009199	GO:BP	27205	3441
7	organic substance biosynthetic process	0.522013	0.0141517	3.21147e-14	159	83	5865	GO:1901576	GO:BP	27205	22571
7	ribonucleoside triphosphate biosynthetic process	0.100629	0.131148	3.45737e-14	159	16	122	GO:0009201	GO:BP	27205	3443
7	proton motive force-driven mitochondrial ATP synthesis	0.081761	0.206349	7.64338e-14	159	13	63	GO:0042776	GO:BP	27205	10938
7	biosynthetic process	0.522013	0.0139262	8.81761e-14	159	83	5960	GO:0009058	GO:BP	27205	3310
7	nucleoside triphosphate biosynthetic process	0.100629	0.120301	1.42349e-13	159	16	133	GO:0009142	GO:BP	27205	3385
7	nucleoside triphosphate metabolic process	0.113208	0.0927835	1.71887e-13	159	18	194	GO:0009141	GO:BP	27205	3384
7	mitochondrial ATP synthesis coupled electron transport	0.081761	0.158537	2.96197e-12	159	13	82	GO:0042775	GO:BP	27205	10937
7	ATP synthesis coupled electron transport	0.081761	0.154762	4.11375e-12	159	13	84	GO:0042773	GO:BP	27205	10935
7	protein metabolic process	0.484277	0.0138639	4.21471e-12	159	77	5554	GO:0019538	GO:BP	27205	6189
7	aerobic electron transport chain	0.0754717	0.173913	1.14942e-11	159	12	69	GO:0019646	GO:BP	27205	6286
7	purine-containing compound metabolic process	0.144654	0.0456349	4.43179e-11	159	23	504	GO:0072521	GO:BP	27205	18397
7	purine nucleotide metabolic process	0.138365	0.0470085	9.29103e-11	159	22	468	GO:0006163	GO:BP	27205	2042
7	respiratory electron transport chain	0.081761	0.116071	1.94157e-10	159	13	112	GO:0022904	GO:BP	27205	6993
7	purine ribonucleotide biosynthetic process	0.100629	0.0761905	2.06239e-10	159	16	210	GO:0009152	GO:BP	27205	3395
7	proton transmembrane transport	0.0880503	0.0965517	2.85168e-10	159	14	145	GO:1902600	GO:BP	27205	23418
7	ribonucleotide biosynthetic process	0.100629	0.0711111	6.00791e-10	159	16	225	GO:0009260	GO:BP	27205	3501
7	nucleotide metabolic process	0.138365	0.0422265	7.99806e-10	159	22	521	GO:0009117	GO:BP	27205	3362
7	ribose phosphate biosynthetic process	0.100629	0.0689655	9.63373e-10	159	16	232	GO:0046390	GO:BP	27205	12823
7	nucleoside phosphate metabolic process	0.138365	0.0414313	1.1671e-09	159	22	531	GO:0006753	GO:BP	27205	2505
7	nucleobase-containing small molecule metabolic process	0.144654	0.0388514	1.26236e-09	159	23	592	GO:0055086	GO:BP	27205	15068
7	purine ribonucleotide metabolic process	0.119497	0.0509383	1.33187e-09	159	19	373	GO:0009150	GO:BP	27205	3393
7	electron transport chain	0.081761	0.0962963	2.22853e-09	159	13	135	GO:0022900	GO:BP	27205	6992
7	purine nucleotide biosynthetic process	0.100629	0.0647773	2.51741e-09	159	16	247	GO:0006164	GO:BP	27205	2043
7	organelle organization	0.345912	0.0156784	2.92356e-09	159	55	3508	GO:0006996	GO:BP	27205	2670
7	metabolic process	0.805031	0.00872232	3.33316e-09	159	128	14675	GO:0008152	GO:BP	27205	3197
7	ribonucleotide metabolic process	0.119497	0.0482234	3.48583e-09	159	19	394	GO:0009259	GO:BP	27205	3500
7	purine-containing compound biosynthetic process	0.100629	0.0622568	4.60958e-09	159	16	257	GO:0072522	GO:BP	27205	18398
7	ribose phosphate metabolic process	0.119497	0.0471464	5.17241e-09	159	19	403	GO:0019693	GO:BP	27205	6330
7	nucleotide biosynthetic process	0.100629	0.0567376	1.87637e-08	159	16	282	GO:0009165	GO:BP	27205	3407
7	cellular metabolic process	0.698113	0.00941077	2.12287e-08	159	111	11795	GO:0044237	GO:BP	27205	11571
7	nucleoside phosphate biosynthetic process	0.100629	0.0561404	2.19976e-08	159	16	285	GO:1901293	GO:BP	27205	22331
7	mitochondrial electron transport, cytochrome c to oxygen	0.0440252	0.291667	1.08216e-07	159	7	24	GO:0006123	GO:BP	27205	2025
7	regulation of protein metabolic process	0.27044	0.0168166	2.05765e-07	159	43	2557	GO:0051246	GO:BP	27205	14362
7	cellular process	0.949686	0.00728378	2.38971e-07	159	151	20731	GO:0009987	GO:BP	27205	3889
7	macromolecule biosynthetic process	0.383648	0.0126504	9.77673e-07	159	61	4822	GO:0009059	GO:BP	27205	3311
7	cell death	0.238994	0.0168365	3.22226e-06	159	38	2257	GO:0008219	GO:BP	27205	3218
7	cellular component organization or biogenesis	0.509434	0.0103382	5.45383e-06	159	81	7835	GO:0071840	GO:BP	27205	17895
7	nitrogen compound metabolic process	0.685535	0.00868388	1.45831e-05	159	109	12552	GO:0006807	GO:BP	27205	2543
7	programmed cell death	0.220126	0.0168512	1.60252e-05	159	35	2077	GO:0012501	GO:BP	27205	4688
7	ribosomal small subunit biogenesis	0.0503145	0.111111	1.65672e-05	159	8	72	GO:0042274	GO:BP	27205	10644
7	negative regulation of biological process	0.421384	0.0111667	1.78668e-05	159	67	6000	GO:0048519	GO:BP	27205	13540
7	organophosphate metabolic process	0.144654	0.0238589	1.79075e-05	159	23	964	GO:0019637	GO:BP	27205	6280
7	regulation of amide metabolic process	0.100629	0.0348584	2.22957e-05	159	16	459	GO:0034248	GO:BP	27205	8971
7	negative regulation of cellular process	0.371069	0.0118593	2.66657e-05	159	59	4975	GO:0048523	GO:BP	27205	13544
7	apoptotic process	0.213836	0.0168317	2.81671e-05	159	34	2020	GO:0006915	GO:BP	27205	2620
7	phosphate-containing compound metabolic process	0.257862	0.0146953	3.25962e-05	159	41	2790	GO:0006796	GO:BP	27205	2537
7	phosphorus metabolic process	0.257862	0.0145752	4.10967e-05	159	41	2813	GO:0006793	GO:BP	27205	2534
7	cellular nitrogen compound metabolic process	0.540881	0.00959393	5.05829e-05	159	86	8964	GO:0034641	GO:BP	27205	9164
7	primary metabolic process	0.698113	0.00842569	5.91179e-05	159	111	13174	GO:0044238	GO:BP	27205	11572
7	ribosome biogenesis	0.081761	0.0422078	5.9751e-05	159	13	308	GO:0042254	GO:BP	27205	10632
7	mitochondrial respiratory chain complex I assembly	0.0440252	0.116667	0.000101249	159	7	60	GO:0032981	GO:BP	27205	8391
7	NADH dehydrogenase complex assembly	0.0440252	0.116667	0.000101249	159	7	60	GO:0010257	GO:BP	27205	4112
7	localization	0.383648	0.0111091	0.000157394	159	61	5491	GO:0051179	GO:BP	27205	14323
7	establishment of localization	0.352201	0.011611	0.000161185	159	56	4823	GO:0051234	GO:BP	27205	14353
7	regulation of translation	0.0880503	0.0352645	0.000163035	159	14	397	GO:0006417	GO:BP	27205	2225
7	cellular component biogenesis	0.327044	0.0119982	0.000204789	159	52	4334	GO:0044085	GO:BP	27205	11542
7	mitochondrial respiratory chain complex assembly	0.0503145	0.0808081	0.000207407	159	8	99	GO:0033108	GO:BP	27205	8471
7	cellular localization	0.283019	0.0128903	0.000270593	159	45	3491	GO:0051641	GO:BP	27205	14642
7	striated muscle cell apoptotic process	0.0440252	0.101449	0.00027067	159	7	69	GO:0010658	GO:BP	27205	4399
7	transport	0.339623	0.011578	0.000341466	159	54	4664	GO:0006810	GO:BP	27205	2546
7	organophosphate biosynthetic process	0.100629	0.0284192	0.000365593	159	16	563	GO:0090407	GO:BP	27205	19299
7	organic substance metabolic process	0.72327	0.00805266	0.000386623	159	115	14281	GO:0071704	GO:BP	27205	17822
7	regulation of protein localization	0.132075	0.0216495	0.000418388	159	21	970	GO:0032880	GO:BP	27205	8304
7	inorganic cation transmembrane transport	0.119497	0.0235149	0.000473318	159	19	808	GO:0098662	GO:BP	27205	19868
7	cellular component organization	0.465409	0.00969348	0.000863615	159	74	7634	GO:0016043	GO:BP	27205	5200
7	monoatomic cation transmembrane transport	0.119497	0.0225922	0.000866377	159	19	841	GO:0098655	GO:BP	27205	19861
7	monoatomic ion transmembrane transport	0.132075	0.0206693	0.000889755	159	21	1016	GO:0034220	GO:BP	27205	8951
7	rRNA processing	0.0628931	0.0460829	0.00107062	159	10	217	GO:0006364	GO:BP	27205	2188
7	synaptic vesicle cycle	0.0628931	0.0458716	0.00111652	159	10	218	GO:0099504	GO:BP	27205	20162
7	regulation of protein ubiquitination	0.0628931	0.0456621	0.00116413	159	10	219	GO:0031396	GO:BP	27205	7549
7	regulation of cell death	0.18239	0.0157952	0.0014294	159	29	1836	GO:0010941	GO:BP	27205	4635
7	negative regulation of nitrogen compound metabolic process	0.220126	0.0139665	0.00154949	159	35	2506	GO:0051172	GO:BP	27205	14317
7	mitochondrion organization	0.0943396	0.027027	0.00166926	159	15	555	GO:0007005	GO:BP	27205	2676
7	monoatomic cation transport	0.132075	0.0197554	0.00183777	159	21	1063	GO:0006812	GO:BP	27205	2548
7	regulation of nitrogen compound metabolic process	0.377358	0.0104493	0.00190816	159	60	5742	GO:0051171	GO:BP	27205	14316
7	protein-containing complex organization	0.238994	0.0131488	0.00208182	159	38	2890	GO:0043933	GO:BP	27205	11466
7	negative regulation of protein metabolic process	0.132075	0.0195531	0.00216432	159	21	1074	GO:0051248	GO:BP	27205	14364
7	regulation of cellular localization	0.132075	0.0194625	0.00232961	159	21	1079	GO:0060341	GO:BP	27205	15386
7	carbohydrate derivative biosynthetic process	0.100629	0.0246154	0.00242677	159	16	650	GO:1901137	GO:BP	27205	22201
7	regulation of primary metabolic process	0.383648	0.0102815	0.0025742	159	61	5933	GO:0080090	GO:BP	27205	18790
7	monoatomic ion transport	0.144654	0.0179547	0.00276409	159	23	1281	GO:0006811	GO:BP	27205	2547
7	inorganic ion transmembrane transport	0.119497	0.0206972	0.00317194	159	19	918	GO:0098660	GO:BP	27205	19866
7	protein-containing complex assembly	0.226415	0.0132841	0.00338237	159	36	2710	GO:0065003	GO:BP	27205	16808
7	cardiac muscle cell apoptotic process	0.0377358	0.0909091	0.00410973	159	6	66	GO:0010659	GO:BP	27205	4400
7	regulation of protein modification by small protein conjugation or removal	0.0628931	0.0396825	0.00413249	159	10	252	GO:1903320	GO:BP	27205	24000
7	rRNA metabolic process	0.0628931	0.0395257	0.00428119	159	10	253	GO:0016072	GO:BP	27205	5223
7	vesicle-mediated transport in synapse	0.0628931	0.0390625	0.00475556	159	10	256	GO:0099003	GO:BP	27205	20060
7	regulation of apoptotic process	0.163522	0.0159216	0.0049818	159	26	1633	GO:0042981	GO:BP	27205	11046
7	carbohydrate derivative metabolic process	0.125786	0.0191939	0.00523199	159	20	1042	GO:1901135	GO:BP	27205	22199
7	negative regulation of striated muscle cell apoptotic process	0.0314465	0.125	0.0059518	159	5	40	GO:0010664	GO:BP	27205	4405
7	establishment of localization in cell	0.194969	0.0141102	0.00603126	159	31	2197	GO:0051649	GO:BP	27205	14650
7	muscle cell apoptotic process	0.0440252	0.0642202	0.00614908	159	7	109	GO:0010657	GO:BP	27205	4398
7	regulation of metabolic process	0.433962	0.00950151	0.00643307	159	69	7262	GO:0019222	GO:BP	27205	5900
7	ribosomal small subunit assembly	0.0251572	0.210526	0.00677767	159	4	19	GO:0000028	GO:BP	27205	14
7	regulation of programmed cell death	0.163522	0.0156156	0.0070737	159	26	1665	GO:0043067	GO:BP	27205	11095
7	heterocycle biosynthetic process	0.289308	0.01128	0.0083464	159	46	4078	GO:0018130	GO:BP	27205	5504
7	transmembrane transport	0.157233	0.0158529	0.00854724	159	25	1577	GO:0055085	GO:BP	27205	15067
7	aromatic compound biosynthetic process	0.289308	0.0112552	0.0088596	159	46	4087	GO:0019438	GO:BP	27205	6097
7	response to heat	0.0440252	0.0588235	0.01101	159	7	119	GO:0009408	GO:BP	27205	3549
7	nucleobase-containing compound biosynthetic process	0.283019	0.0112303	0.0124038	159	45	4007	GO:0034654	GO:BP	27205	9171
7	regulation of localization	0.194969	0.0135194	0.0143369	159	31	2293	GO:0032879	GO:BP	27205	8303
7	negative regulation of protein modification process	0.081761	0.0256917	0.0155799	159	13	506	GO:0031400	GO:BP	27205	7553
7	regulation of signal transduction by p53 class mediator	0.0377358	0.0722892	0.0157324	159	6	83	GO:1901796	GO:BP	27205	22751
7	protein refolding	0.0251572	0.166667	0.0181624	159	4	24	GO:0042026	GO:BP	27205	10497
7	cellular component assembly	0.283019	0.0110647	0.0183001	159	45	4067	GO:0022607	GO:BP	27205	6977
7	protein folding	0.0503145	0.0437158	0.0213962	159	8	183	GO:0006457	GO:BP	27205	2254
7	organic cyclic compound biosynthetic process	0.289308	0.0108542	0.0232854	159	46	4238	GO:1901362	GO:BP	27205	22388
7	regulation of molecular function	0.207547	0.0127413	0.0238705	159	33	2590	GO:0065009	GO:BP	27205	16813
7	axon extension	0.0440252	0.0507246	0.0290291	159	7	138	GO:0048675	GO:BP	27205	13673
7	cellular response to heat	0.0314465	0.0892857	0.032044	159	5	56	GO:0034605	GO:BP	27205	9145
7	negative regulation of metabolic process	0.251572	0.0113282	0.0390027	159	40	3531	GO:0009892	GO:BP	27205	3830
7	positive regulation of biological process	0.396226	0.00935829	0.039492	159	63	6732	GO:0048518	GO:BP	27205	13539
7	response to temperature stimulus	0.0503145	0.04	0.0405951	159	8	200	GO:0009266	GO:BP	27205	3507
7	neuron projection extension	0.0503145	0.04	0.0405951	159	8	200	GO:1990138	GO:BP	27205	26321
7	regulation of macromolecule metabolic process	0.396226	0.00931264	0.0463496	159	63	6765	GO:0060255	GO:BP	27205	15305
7	cytoplasm	0.890909	0.0126506	1.79085e-33	165	147	11620	GO:0005737	GO:CC	27262	309
7	cytosolic ribosome	0.157576	0.226087	2.40849e-31	165	26	115	GO:0022626	GO:CC	27262	860
7	inner mitochondrial membrane protein complex	0.157576	0.173333	4.33722e-28	165	26	150	GO:0098800	GO:CC	27262	3271
7	ribosomal subunit	0.169697	0.133971	4.13073e-27	165	28	209	GO:0044391	GO:CC	27262	2082
7	protein-containing complex	0.678788	0.0152964	1.14351e-25	165	112	7322	GO:0032991	GO:CC	27262	1343
7	intracellular anatomical structure	0.975758	0.00919737	1.33408e-23	165	161	17505	GO:0005622	GO:CC	27262	237
7	synapse	0.321212	0.0316041	6.98358e-22	165	53	1677	GO:0045202	GO:CC	27262	2147
7	respiratory chain complex	0.115152	0.211111	7.73829e-22	165	19	90	GO:0098803	GO:CC	27262	3273
7	mitochondrial respirasome	0.115152	0.211111	7.73829e-22	165	19	90	GO:0005746	GO:CC	27262	317
7	respirasome	0.115152	0.193878	4.48064e-21	165	19	98	GO:0070469	GO:CC	27262	2505
7	ribosome	0.181818	0.0714286	5.44471e-21	165	30	420	GO:0005840	GO:CC	27262	389
7	cytosol	0.472727	0.0188999	4.15334e-20	165	78	4127	GO:0005829	GO:CC	27262	380
7	mitochondrial protein-containing complex	0.157576	0.0860927	5.37256e-20	165	26	302	GO:0098798	GO:CC	27262	3269
7	myelin sheath	0.139394	0.109524	6.84377e-20	165	23	210	GO:0043209	GO:CC	27262	1877
7	mitochondrial inner membrane	0.181818	0.0553506	8.05052e-18	165	30	542	GO:0005743	GO:CC	27262	314
7	organelle inner membrane	0.187879	0.0514096	1.493e-17	165	31	603	GO:0019866	GO:CC	27262	826
7	intracellular organelle	0.90303	0.00937638	2.02059e-17	165	149	15891	GO:0043229	GO:CC	27262	1886
7	mitochondrial membrane	0.206061	0.0437018	3.0028e-17	165	34	778	GO:0031966	GO:CC	27262	1217
7	cell junction	0.333333	0.0239756	3.29076e-17	165	55	2294	GO:0030054	GO:CC	27262	871
7	organelle	0.909091	0.00924841	4.16957e-17	165	150	16219	GO:0043226	GO:CC	27262	1883
7	mitochondrion	0.30303	0.0256279	1.65147e-16	165	50	1951	GO:0005739	GO:CC	27262	310
7	mitochondrial envelope	0.206061	0.0406213	2.86132e-16	165	34	837	GO:0005740	GO:CC	27262	311
7	cytosolic small ribosomal subunit	0.0787879	0.270833	4.5668e-16	165	13	48	GO:0022627	GO:CC	27262	861
7	postsynapse	0.206061	0.039261	8.109e-16	165	34	866	GO:0098794	GO:CC	27262	3266
7	membrane protein complex	0.236364	0.0323383	1.37353e-15	165	39	1206	GO:0098796	GO:CC	27262	3267
7	cytosolic large ribosomal subunit	0.0787879	0.2	3.55848e-14	165	13	65	GO:0022625	GO:CC	27262	859
7	small ribosomal subunit	0.0848485	0.162791	4.94698e-14	165	14	86	GO:0015935	GO:CC	27262	712
7	organelle membrane	0.369697	0.0184848	5.42041e-14	165	61	3300	GO:0031090	GO:CC	27262	1048
7	cytochrome complex	0.0666667	0.275	1.77927e-13	165	11	40	GO:0070069	GO:CC	27262	2430
7	presynapse	0.175758	0.0389785	4.11148e-13	165	29	744	GO:0098793	GO:CC	27262	3265
7	organelle envelope	0.224242	0.0286378	5.49451e-13	165	37	1292	GO:0031967	GO:CC	27262	1218
7	envelope	0.224242	0.0286378	5.49451e-13	165	37	1292	GO:0031975	GO:CC	27262	1225
7	large ribosomal subunit	0.0909091	0.117188	6.46083e-13	165	15	128	GO:0015934	GO:CC	27262	711
7	catalytic complex	0.254545	0.0235031	4.41992e-12	165	42	1787	GO:1902494	GO:CC	27262	3620
7	mitochondrial respiratory chain complex IV	0.0545455	0.36	5.16934e-12	165	9	25	GO:0005751	GO:CC	27262	321
7	respiratory chain complex IV	0.0545455	0.321429	1.72079e-11	165	9	28	GO:0045277	GO:CC	27262	2184
7	cellular anatomical entity	1	0.00723811	4.31334e-11	165	165	22796	GO:0110165	GO:CC	27262	3449
7	proton-transporting two-sector ATPase complex	0.0606061	0.188679	2.45467e-10	165	10	53	GO:0016469	GO:CC	27262	745
7	asymmetric synapse	0.121212	0.0447427	1.26983e-09	165	20	447	GO:0032279	GO:CC	27262	1285
7	membrane-bounded organelle	0.8	0.00880411	4.21262e-09	165	132	14993	GO:0043227	GO:CC	27262	1884
7	neuron to neuron synapse	0.121212	0.0413223	5.32781e-09	165	20	484	GO:0098984	GO:CC	27262	3331
7	postsynaptic density	0.115152	0.044289	5.39629e-09	165	19	429	GO:0014069	GO:CC	27262	696
7	NADH dehydrogenase complex	0.0545455	0.18	5.57195e-09	165	9	50	GO:0030964	GO:CC	27262	1017
7	mitochondrial respiratory chain complex I	0.0545455	0.18	5.57195e-09	165	9	50	GO:0005747	GO:CC	27262	318
7	respiratory chain complex I	0.0545455	0.18	5.57195e-09	165	9	50	GO:0045271	GO:CC	27262	2178
7	intracellular membrane-bounded organelle	0.781818	0.00888552	7.61527e-09	165	129	14518	GO:0043231	GO:CC	27262	1888
7	mitochondrial proton-transporting ATP synthase complex	0.0424242	0.333333	8.91193e-09	165	7	21	GO:0005753	GO:CC	27262	322
7	proton-transporting ATP synthase complex	0.0424242	0.318182	1.30046e-08	165	7	22	GO:0045259	GO:CC	27262	2166
7	postsynaptic specialization	0.115152	0.0404255	2.56507e-08	165	19	470	GO:0099572	GO:CC	27262	3384
7	oxidoreductase complex	0.0666667	0.0901639	7.05542e-08	165	11	122	GO:1990204	GO:CC	27262	3808
7	intracellular non-membrane-bounded organelle	0.460606	0.0116851	1.08688e-07	165	76	6504	GO:0043232	GO:CC	27262	1889
7	non-membrane-bounded organelle	0.460606	0.0116833	1.09514e-07	165	76	6505	GO:0043228	GO:CC	27262	1885
7	polysome	0.0545455	0.126761	1.48618e-07	165	9	71	GO:0005844	GO:CC	27262	390
7	polysomal ribosome	0.0424242	0.205882	3.85954e-07	165	7	34	GO:0042788	GO:CC	27262	1845
7	ATPase complex	0.0666667	0.0753425	4.85655e-07	165	11	146	GO:1904949	GO:CC	27262	3698
7	transmembrane transporter complex	0.0969697	0.0408163	7.52012e-07	165	16	392	GO:1902495	GO:CC	27262	3621
7	transporter complex	0.0969697	0.0383693	1.80994e-06	165	16	417	GO:1990351	GO:CC	27262	3868
7	ribonucleoprotein complex	0.230303	0.0164859	3.06511e-06	165	38	2305	GO:1990904	GO:CC	27262	4028
7	neuron projection	0.187879	0.0189835	3.92489e-06	165	31	1633	GO:0043005	GO:CC	27262	1851
7	proton-transporting two-sector ATPase complex, catalytic domain	0.030303	0.277778	1.93202e-05	165	5	18	GO:0033178	GO:CC	27262	1398
7	proton-transporting two-sector ATPase complex, proton-transporting domain	0.030303	0.185185	0.000174195	165	5	27	GO:0033177	GO:CC	27262	1397
7	mitochondrial proton-transporting ATP synthase complex, coupling factor F(o)	0.0242424	0.333333	0.000193922	165	4	12	GO:0000276	GO:CC	27262	44
7	cell projection	0.224242	0.0141383	0.000244034	165	37	2617	GO:0042995	GO:CC	27262	1850
7	plasma membrane bounded cell projection	0.218182	0.0143027	0.000272169	165	36	2517	GO:0120025	GO:CC	27262	3453
7	proton-transporting ATP synthase complex, coupling factor F(o)	0.0242424	0.285714	0.000388461	165	4	14	GO:0045263	GO:CC	27262	2170
7	membrane	0.557576	0.00892338	0.000655424	165	92	10310	GO:0016020	GO:CC	27262	722
7	mitochondrial proton-transporting ATP synthase complex, catalytic sector F(1)	0.0181818	0.6	0.000678552	165	3	5	GO:0000275	GO:CC	27262	43
7	rough endoplasmic reticulum	0.0424242	0.0660377	0.00121377	165	7	106	GO:0005791	GO:CC	27262	356
7	synaptic vesicle	0.0606061	0.0387597	0.00131539	165	10	258	GO:0008021	GO:CC	27262	488
7	proton-transporting ATP synthase complex, catalytic core F(1)	0.0181818	0.5	0.00135106	165	3	6	GO:0045261	GO:CC	27262	2168
7	distal axon	0.0727273	0.0307692	0.0015454	165	12	390	GO:0150034	GO:CC	27262	3593
7	membrane raft	0.0727273	0.0298507	0.0020997	165	12	402	GO:0045121	GO:CC	27262	2137
7	membrane microdomain	0.0727273	0.0297767	0.00215293	165	12	403	GO:0098857	GO:CC	27262	3298
7	exocytic vesicle	0.0606061	0.0361011	0.00245678	165	10	277	GO:0070382	GO:CC	27262	2478
7	cell body	0.10303	0.0204327	0.00406521	165	17	832	GO:0044297	GO:CC	27262	2056
7	endomembrane system	0.284848	0.0109762	0.00691073	165	47	4282	GO:0012505	GO:CC	27262	689
7	glutamatergic synapse	0.0848485	0.0229508	0.00697071	165	14	610	GO:0098978	GO:CC	27262	3325
7	vacuolar membrane	0.0606061	0.031348	0.00829533	165	10	319	GO:0005774	GO:CC	27262	341
7	endoplasmic reticulum	0.163636	0.0142555	0.00857546	165	27	1894	GO:0005783	GO:CC	27262	348
7	dendritic growth cone	0.0181818	0.272727	0.0109004	165	3	11	GO:0044294	GO:CC	27262	2053
7	bounding membrane of organelle	0.151515	0.0146456	0.011408	165	25	1707	GO:0098588	GO:CC	27262	3225
7	exocytic vesicle membrane	0.0424242	0.0466667	0.0117285	165	7	150	GO:0099501	GO:CC	27262	3372
7	synaptic vesicle membrane	0.0424242	0.0466667	0.0117285	165	7	150	GO:0030672	GO:CC	27262	963
7	extrinsic component of organelle membrane	0.030303	0.0806452	0.0117696	165	5	62	GO:0031312	GO:CC	27262	1092
7	transport vesicle	0.0666667	0.026506	0.0151718	165	11	415	GO:0030133	GO:CC	27262	912
7	somatodendritic compartment	0.115152	0.0169643	0.0160606	165	19	1120	GO:0036477	GO:CC	27262	1724
7	neuronal cell body	0.0909091	0.0201072	0.0161175	165	15	746	GO:0043025	GO:CC	27262	1853
7	clathrin-coated vesicle membrane	0.030303	0.0714286	0.0211722	165	5	70	GO:0030665	GO:CC	27262	956
7	microtubule cytoskeleton	0.127273	0.0153397	0.0267782	165	21	1369	GO:0015630	GO:CC	27262	710
7	axon	0.0909091	0.0188679	0.0327154	165	15	795	GO:0030424	GO:CC	27262	935
7	dendrite	0.0909091	0.0187266	0.0355305	165	15	801	GO:0030425	GO:CC	27262	936
7	dendritic tree	0.0909091	0.01868	0.0365148	165	15	803	GO:0097447	GO:CC	27262	3014
7	structural constituent of ribosome	0.174194	0.0769231	3.3203e-19	155	27	351	GO:0003735	GO:MF	25177	353
7	structural molecule activity	0.232258	0.0383795	3.22106e-16	155	36	938	GO:0005198	GO:MF	25177	1351
7	rRNA binding	0.0774194	0.169014	9.10448e-12	155	12	71	GO:0019843	GO:MF	25177	3740
7	proton-transporting ATP synthase activity, rotational mechanism	0.0451613	0.4375	1.61279e-09	155	7	16	GO:0046933	GO:MF	25177	6301
7	proton transmembrane transporter activity	0.0774194	0.104348	3.47903e-09	155	12	115	GO:0015078	GO:MF	25177	2307
7	proton channel activity	0.0451613	0.304348	3.33369e-08	155	7	23	GO:0015252	GO:MF	25177	2449
7	enzyme binding	0.264516	0.0177259	1.72582e-07	155	41	2313	GO:0019899	GO:MF	25177	3754
7	protein-containing complex binding	0.212903	0.0211268	1.7853e-07	155	33	1562	GO:0044877	GO:MF	25177	6099
7	protein binding	0.658065	0.00972262	5.35168e-07	155	102	10491	GO:0005515	GO:MF	25177	1496
7	binding	0.845161	0.00803878	1.54345e-05	155	131	16296	GO:0005488	GO:MF	25177	1484
7	ribonucleoside triphosphate phosphatase activity	0.122581	0.0282738	1.80358e-05	155	19	672	GO:0017111	GO:MF	25177	3167
7	pyrophosphatase activity	0.122581	0.0260274	6.55409e-05	155	19	730	GO:0016462	GO:MF	25177	2823
7	hydrolase activity, acting on acid anhydrides, in phosphorus-containing anhydrides	0.122581	0.0259918	6.69389e-05	155	19	731	GO:0016818	GO:MF	25177	3019
7	hydrolase activity, acting on acid anhydrides	0.122581	0.0259918	6.69389e-05	155	19	731	GO:0016817	GO:MF	25177	3018
7	primary active transmembrane transporter activity	0.0580645	0.0642857	0.000111966	155	9	140	GO:0015399	GO:MF	25177	2532
7	ATP-dependent activity	0.103226	0.0278261	0.000286806	155	16	575	GO:0140657	GO:MF	25177	10725
7	ubiquitin protein ligase binding	0.0774194	0.0376176	0.000362595	155	12	319	GO:0031625	GO:MF	25177	4176
7	pyrophosphate hydrolysis-driven proton transmembrane transporter activity	0.0322581	0.172414	0.000441246	155	5	29	GO:0009678	GO:MF	25177	2157
7	dATP binding	0.0193548	0.75	0.000460264	155	3	4	GO:0032564	GO:MF	25177	4494
7	angiostatin binding	0.0193548	0.75	0.000460264	155	3	4	GO:0043532	GO:MF	25177	5814
7	ubiquitin-like protein ligase binding	0.0774194	0.0353982	0.000685582	155	12	339	GO:0044389	GO:MF	25177	6044
7	protein kinase binding	0.116129	0.023166	0.000766545	155	18	777	GO:0019901	GO:MF	25177	3756
7	identical protein binding	0.219355	0.0145673	0.000832086	155	34	2334	GO:0042802	GO:MF	25177	5683
7	unfolded protein binding	0.0451613	0.0752688	0.000898613	155	7	93	GO:0051082	GO:MF	25177	8018
7	adenyl deoxyribonucleotide binding	0.0193548	0.6	0.00114545	155	3	5	GO:0032558	GO:MF	25177	4488
7	purine deoxyribonucleotide binding	0.0193548	0.5	0.00228053	155	3	6	GO:0032554	GO:MF	25177	4484
7	GTP binding	0.0774194	0.0311688	0.00253759	155	12	385	GO:0005525	GO:MF	25177	1505
7	mRNA binding	0.0774194	0.0308483	0.00281794	155	12	389	GO:0003729	GO:MF	25177	351
7	RNA binding	0.212903	0.0140068	0.00285086	155	33	2356	GO:0003723	GO:MF	25177	346
7	kinase binding	0.116129	0.0207612	0.00350719	155	18	867	GO:0019900	GO:MF	25177	3755
7	structural constituent of cytoskeleton	0.0387097	0.0789474	0.00382357	155	6	76	GO:0005200	GO:MF	25177	1353
7	guanyl ribonucleotide binding	0.0774194	0.0293399	0.00466881	155	12	409	GO:0032561	GO:MF	25177	4491
7	guanyl nucleotide binding	0.0774194	0.0293399	0.00466881	155	12	409	GO:0019001	GO:MF	25177	3605
7	nucleoside phosphate binding	0.2	0.0141294	0.00490426	155	31	2194	GO:1901265	GO:MF	25177	10971
7	nucleotide binding	0.2	0.0141294	0.00490426	155	31	2194	GO:0000166	GO:MF	25177	31
7	protein domain specific binding	0.109677	0.0208078	0.00623517	155	17	817	GO:0019904	GO:MF	25177	3759
7	deoxyribonucleotide binding	0.0193548	0.375	0.00632785	155	3	8	GO:0032552	GO:MF	25177	4482
7	proton-transporting ATPase activity, rotational mechanism	0.0258065	0.166667	0.00673697	155	4	24	GO:0046961	GO:MF	25177	6307
7	ATPase activity, coupled to transmembrane movement of ions, rotational mechanism	0.0258065	0.166667	0.00673697	155	4	24	GO:0044769	GO:MF	25177	6094
7	ATPase-coupled ion transmembrane transporter activity	0.0258065	0.166667	0.00673697	155	4	24	GO:0042625	GO:MF	25177	5670
7	cytoskeletal protein binding	0.122581	0.0187933	0.00780658	155	19	1011	GO:0008092	GO:MF	25177	1548
7	purine nucleotide binding	0.187097	0.0142366	0.00872926	155	29	2037	GO:0017076	GO:MF	25177	3152
7	mRNA 5'-UTR binding	0.0258065	0.153846	0.00938799	155	4	26	GO:0048027	GO:MF	25177	7311
7	Tat protein binding	0.0193548	0.333333	0.00944885	155	3	9	GO:0030957	GO:MF	25177	4105
7	ATPase-coupled monoatomic cation transmembrane transporter activity	0.0322581	0.0862069	0.0147457	155	5	58	GO:0019829	GO:MF	25177	3734
7	heat shock protein binding	0.0451613	0.0482759	0.0167698	155	7	145	GO:0031072	GO:MF	25177	4120
7	transmembrane transporter binding	0.0451613	0.047619	0.0183066	155	7	147	GO:0044325	GO:MF	25177	6038
7	CTP binding	0.0129032	1	0.0190194	155	2	2	GO:0002135	GO:MF	25177	305
7	oxidoreduction-driven active transmembrane transporter activity	0.0258065	0.129032	0.0192911	155	4	31	GO:0015453	GO:MF	25177	2571
7	purine ribonucleotide binding	0.174194	0.0140772	0.0217336	155	27	1918	GO:0032555	GO:MF	25177	4485
7	ribonucleotide binding	0.174194	0.0139391	0.0257387	155	27	1937	GO:0032553	GO:MF	25177	4483
7	catalytic activity	0.367742	0.00994938	0.0270158	155	57	5729	GO:0003824	GO:MF	25177	368
7	purine ribonucleoside triphosphate binding	0.167742	0.0141612	0.0278804	155	26	1836	GO:0035639	GO:MF	25177	5385
7	translation initiation factor binding	0.0258065	0.111111	0.0352604	155	4	36	GO:0031369	GO:MF	25177	4141
7	translation regulator activity	0.0451613	0.0426829	0.0366545	155	7	164	GO:0045182	GO:MF	25177	6126
7	peptidyl-prolyl cis-trans isomerase activity	0.0258065	0.105263	0.0437648	155	4	38	GO:0003755	GO:MF	25177	357
7	ligase activity	0.0451613	0.0411765	0.0459254	155	7	170	GO:0016874	GO:MF	25177	3065
7	ATP hydrolysis activity	0.0645161	0.0273973	0.0467664	155	10	365	GO:0016887	GO:MF	25177	3076
7	Abnormal CSF lactate concentration	0.191489	0.0849057	0.000567617	47	9	106	HP:0030085	HP	4965	10224
7	Increased CSF lactate	0.191489	0.0849057	0.000567617	47	9	106	HP:0002490	HP	4965	1804
7	Increased serum lactate	0.234043	0.0541872	0.00243019	47	11	203	HP:0002151	HP	4965	1581
7	Abnormal CSF metabolite concentration	0.191489	0.0629371	0.0071073	47	9	143	HP:0025454	HP	4965	9884
7	Hyperalaninemia	0.12766	0.109091	0.0132361	47	6	55	HP:0003348	HP	4965	2421
7	Abnormal circulating pyruvate family amino acid concentration	0.12766	0.107143	0.0147193	47	6	56	HP:0010915	HP	4965	7344
7	Abnormal circulating alanine concentration	0.12766	0.107143	0.0147193	47	6	56	HP:0010916	HP	4965	7345
7	Acidosis	0.276596	0.0344828	0.0368782	47	13	377	HP:0001941	HP	4965	1411
7	Lactic acidosis	0.191489	0.0511364	0.0383468	47	9	176	HP:0003128	HP	4965	2256
7	Abnormal circulating proteinogenic amino acid derivative concentration	0.12766	0.0909091	0.0383594	47	6	66	HP:0033108	HP	4965	13101
7	Oxidative phosphorylation	0.271028	0.218045	1.68729e-27	107	29	133	KEGG:00190	KEGG	8947	18
7	Parkinson disease	0.317757	0.129771	1.07621e-24	107	34	262	KEGG:05012	KEGG	8947	405
7	Prion disease	0.308411	0.12406	3.07426e-23	107	33	266	KEGG:05020	KEGG	8947	409
7	Ribosome	0.252336	0.159763	1.32722e-21	107	27	169	KEGG:03010	KEGG	8947	208
7	Huntington disease	0.308411	0.11	1.56676e-21	107	33	300	KEGG:05016	KEGG	8947	407
7	Thermogenesis	0.271028	0.127193	1.92457e-20	107	29	228	KEGG:04714	KEGG	8947	343
7	Amyotrophic lateral sclerosis	0.317757	0.0928962	7.61938e-20	107	34	366	KEGG:05014	KEGG	8947	406
7	Diabetic cardiomyopathy	0.252336	0.132353	2.32955e-19	107	27	204	KEGG:05415	KEGG	8947	485
7	Alzheimer disease	0.308411	0.0868421	2.91671e-18	107	33	380	KEGG:05010	KEGG	8947	404
7	Coronavirus disease - COVID-19	0.252336	0.11157	2.24802e-17	107	27	242	KEGG:05171	KEGG	8947	445
7	Chemical carcinogenesis - reactive oxygen species	0.242991	0.118182	2.6555e-17	107	26	220	KEGG:05208	KEGG	8947	453
7	Pathways of neurodegeneration - multiple diseases	0.317757	0.0724947	2.11953e-16	107	34	469	KEGG:05022	KEGG	8947	410
7	Non-alcoholic fatty liver disease	0.158879	0.11039	2.26718e-10	107	17	154	KEGG:04932	KEGG	8947	382
7	Cardiac muscle contraction	0.0934579	0.114943	6.38474e-06	107	10	87	KEGG:04260	KEGG	8947	290
7	Retrograde endocannabinoid signaling	0.0934579	0.0684932	0.000786183	107	10	146	KEGG:04723	KEGG	8947	347
7	Phagosome	0.0934579	0.0574713	0.00362416	107	10	174	KEGG:04145	KEGG	8947	276
7	Metabolic pathways	0.327103	0.0217391	0.0144094	107	35	1610	KEGG:01100	KEGG	8947	181
7	Salmonella infection	0.102804	0.0438247	0.0171651	107	11	251	KEGG:05132	KEGG	8947	422
7	Gap junction	0.0560748	0.0697674	0.0483789	107	6	86	KEGG:04540	KEGG	8947	312
7	L13a-mediated translational silencing of Ceruloplasmin expression	0.239316	0.261682	2.17714e-26	117	28	107	REAC:R-MMU-156827	REAC	8362	750
7	GTP hydrolysis and joining of the 60S ribosomal subunit	0.239316	0.259259	2.90858e-26	117	28	108	REAC:R-MMU-72706	REAC	8362	563
7	SRP-dependent cotranslational protein targeting to membrane	0.222222	0.295455	7.0789e-26	117	26	88	REAC:R-MMU-1799339	REAC	8362	1326
7	Nonsense Mediated Decay (NMD) independent of the Exon Junction Complex (EJC)	0.222222	0.288889	1.3767e-25	117	26	90	REAC:R-MMU-975956	REAC	8362	935
7	Cap-dependent Translation Initiation	0.239316	0.243478	2.02697e-25	117	28	115	REAC:R-MMU-72737	REAC	8362	235
7	Eukaryotic Translation Initiation	0.239316	0.243478	2.02697e-25	117	28	115	REAC:R-MMU-72613	REAC	8362	452
7	Formation of a pool of free 40S subunits	0.222222	0.268041	1.2344e-24	117	26	97	REAC:R-MMU-72689	REAC	8362	506
7	Nonsense-Mediated Decay (NMD)	0.222222	0.238532	3.51473e-23	117	26	109	REAC:R-MMU-927802	REAC	8362	936
7	Nonsense Mediated Decay (NMD) enhanced by the Exon Junction Complex (EJC)	0.222222	0.238532	3.51473e-23	117	26	109	REAC:R-MMU-975957	REAC	8362	934
7	Translation	0.25641	0.138889	9.084e-20	117	30	216	REAC:R-MMU-72766	REAC	8362	1600
7	rRNA processing in the nucleus and cytosol	0.230769	0.161677	2.3921e-19	117	27	167	REAC:R-MMU-8868773	REAC	8362	1714
7	Major pathway of rRNA processing in the nucleolus and cytosol	0.230769	0.161677	2.3921e-19	117	27	167	REAC:R-MMU-6791226	REAC	8362	797
7	rRNA processing	0.230769	0.161677	2.3921e-19	117	27	167	REAC:R-MMU-72312	REAC	8362	1713
7	Respiratory electron transport, ATP synthesis by chemiosmotic coupling, and heat production by uncoupling proteins.	0.179487	0.185841	6.5011e-16	117	21	113	REAC:R-MMU-163200	REAC	8362	1289
7	The citric acid (TCA) cycle and respiratory electron transport	0.188034	0.138365	6.82838e-14	117	22	159	REAC:R-MMU-1428517	REAC	8362	1554
7	Translation initiation complex formation	0.119658	0.245614	6.77641e-12	117	14	57	REAC:R-MMU-72649	REAC	8362	1601
7	Ribosomal scanning and start codon recognition	0.119658	0.245614	6.77641e-12	117	14	57	REAC:R-MMU-72702	REAC	8362	1300
7	Activation of the mRNA upon binding of the cap-binding complex and eIFs, and subsequent binding to 43S	0.119658	0.241379	8.82941e-12	117	14	58	REAC:R-MMU-72662	REAC	8362	70
7	Formation of the ternary complex, and subsequently, the 43S complex	0.111111	0.26	2.68485e-11	117	13	50	REAC:R-MMU-72695	REAC	8362	515
7	Cellular responses to stimuli	0.247863	0.0669746	2.12191e-10	117	29	433	REAC:R-MMU-8953897	REAC	8362	265
7	Metabolism of RNA	0.264957	0.0588235	9.11475e-10	117	31	527	REAC:R-MMU-8953854	REAC	8362	802
7	Cellular responses to stress	0.239316	0.0651163	1.14062e-09	117	28	430	REAC:R-MMU-2262752	REAC	8362	266
7	Respiratory electron transport	0.119658	0.155556	5.42432e-09	117	14	90	REAC:R-MMU-611105	REAC	8362	1288
7	Cristae formation	0.0598291	0.411765	4.43947e-07	117	7	17	REAC:R-MMU-8949613	REAC	8362	319
7	Formation of ATP by chemiosmotic coupling	0.0598291	0.411765	4.43947e-07	117	7	17	REAC:R-MMU-163210	REAC	8362	500
7	TP53 Regulates Metabolic Genes	0.0940171	0.157143	7.90741e-07	117	11	70	REAC:R-MMU-5628897	REAC	8362	1510
7	HSP90 chaperone cycle for steroid hormone receptors (SHR) in the presence of ligand	0.0769231	0.176471	8.19413e-06	117	9	51	REAC:R-MMU-3371497	REAC	8362	622
7	Metabolism of proteins	0.401709	0.0301282	1.22816e-05	117	47	1560	REAC:R-MMU-392499	REAC	8362	817
7	Mitochondrial biogenesis	0.0598291	0.25	2.37979e-05	117	7	28	REAC:R-MMU-1592230	REAC	8362	842
7	Organelle biogenesis and maintenance	0.128205	0.0731707	4.24705e-05	117	15	205	REAC:R-MMU-1852241	REAC	8362	966
7	HSF1 activation	0.034188	0.5	0.000713687	117	4	8	REAC:R-MMU-3371511	REAC	8362	620
7	Complex I biogenesis	0.0598291	0.134615	0.00203774	117	7	52	REAC:R-MMU-6799198	REAC	8362	307
7	Recycling pathway of L1	0.0512821	0.171429	0.00224831	117	6	35	REAC:R-MMU-437239	REAC	8362	1214
7	The role of GTSE1 in G2/M progression after G2 checkpoint	0.0683761	0.106667	0.00260873	117	8	75	REAC:R-MMU-8852276	REAC	8362	1559
7	Attenuation phase	0.034188	0.307692	0.00690483	117	4	13	REAC:R-MMU-3371568	REAC	8362	140
7	RHO GTPases activate IQGAPs	0.042735	0.172414	0.0130666	117	5	29	REAC:R-MMU-5626467	REAC	8362	1133
7	Microtubule-dependent trafficking of connexons from Golgi to the plasma membrane	0.034188	0.25	0.0170138	117	4	16	REAC:R-MMU-190840	REAC	8362	831
7	Cytoprotection by HMOX1	0.0512821	0.117647	0.0207899	117	6	51	REAC:R-MMU-9707564	REAC	8362	331
7	Transport of connexons to the plasma membrane	0.034188	0.235294	0.0220092	117	4	17	REAC:R-MMU-190872	REAC	8362	1617
7	MHC class II antigen presentation	0.0683761	0.0784314	0.0247807	117	8	102	REAC:R-MMU-2132295	REAC	8362	794
7	Transcriptional Regulation by TP53	0.111111	0.047619	0.0312538	117	13	273	REAC:R-MMU-3700989	REAC	8362	1586
7	Cellular response to heat stress	0.0598291	0.0886076	0.0323459	117	7	79	REAC:R-MMU-3371556	REAC	8362	262
7	Protein methylation	0.034188	0.210526	0.0350761	117	4	19	REAC:R-MMU-8876725	REAC	8362	1097
7	Aggrephagy	0.042735	0.138889	0.0383633	117	5	36	REAC:R-MMU-9646399	REAC	8362	92
7	Recruitment of NuMA to mitotic centrosomes	0.0598291	0.0853659	0.0409829	117	7	82	REAC:R-MMU-380320	REAC	8362	1210
7	G2/M Transition	0.0854701	0.0578035	0.0428193	117	10	173	REAC:R-MMU-69275	REAC	8362	545
7	Mitotic G2-G2/M phases	0.0854701	0.0571429	0.047069	117	10	175	REAC:R-MMU-453274	REAC	8362	855
7	Factor: E2F; motif: GGCGSG	0.771084	0.0122488	1.06716e-11	166	128	10450	TF:M00803	TF	21866	774
7	Factor: FOXN4; motif: NNWANNCGWMCGCGTCNNNNMT; match class: 1	0.861446	0.0111693	1.11708e-11	166	143	12803	TF:M04662_1	TF	21866	1157
7	Factor: c-ets-1; motif: ACCGGAWRYN	0.656627	0.01295	1.42177e-09	166	109	8417	TF:M01986	TF	21866	452
7	Factor: ZF5; motif: GSGCGCGR; match class: 1	0.813253	0.0111616	1.66648e-09	166	135	12095	TF:M00716_1	TF	21866	3825
7	Factor: FOXN4; motif: NNWANNCGWMCGCGTCNNNNMT	0.933735	0.00966877	4.0664e-08	166	155	16031	TF:M04662	TF	21866	1156
7	Factor: ZF5; motif: GSGCGCGR	0.89759	0.0100202	4.19425e-08	166	149	14870	TF:M00716	TF	21866	3824
7	Factor: GABP-alpha; motif: CTTCCK; match class: 1	0.439759	0.0155451	8.21786e-08	166	73	4696	TF:M01660_1	TF	21866	1233
7	Factor: ELK-1; motif: ACCGGAWRTN; match class: 1	0.662651	0.0121735	8.76158e-08	166	110	9036	TF:M01981_1	TF	21866	911
7	Factor: c-Ets-1; motif: NNNRCCGGAWRYNNNN	0.578313	0.0131363	1.11195e-07	166	96	7308	TF:M01078	TF	21866	450
7	Factor: ZF5; motif: NRNGNGCGCGCWN	0.879518	0.0100627	1.63132e-07	166	146	14509	TF:M00333	TF	21866	3826
7	Factor: CREM; motif: TGACGTCASYN	0.493976	0.0141991	2.40776e-07	166	82	5775	TF:M01820	TF	21866	586
7	Factor: Atf-1; motif: RTGACGTA	0.644578	0.0121164	3.76072e-07	166	107	8831	TF:M07980	TF	21866	192
7	Factor: E2F-1; motif: GNGGGCGGGRMN	0.86747	0.0100876	3.78036e-07	166	144	14275	TF:M10209	TF	21866	728
7	Factor: E2F-4; motif: NTTTCSCGCC	0.722892	0.0113272	4.16261e-07	166	120	10594	TF:M07380	TF	21866	760
7	Factor: ZF5; motif: GYCGCGCARNGCNN	0.674699	0.0117524	5.19965e-07	166	112	9530	TF:M02933	TF	21866	3838
7	Factor: PEA3; motif: RCCGGAAGYN	0.686747	0.011424	1.96005e-06	166	114	9979	TF:M01991	TF	21866	2656
7	Factor: Atf-1; motif: RTGACGTA; match class: 1	0.325301	0.0173633	2.01228e-06	166	54	3110	TF:M07980_1	TF	21866	193
7	Factor: GABP-alpha; motif: CTTCCK	0.716867	0.0110359	4.41735e-06	166	119	10783	TF:M01660	TF	21866	1232
7	Factor: E2F-1; motif: GNGGGCGGGRMN; match class: 1	0.710843	0.0110725	4.85819e-06	166	118	10657	TF:M10209_1	TF	21866	729
7	Factor: Ets2; motif: ACCGGAWRYN	0.584337	0.0122459	5.61323e-06	166	97	7921	TF:M01989	TF	21866	456
7	Factor: ELK-1; motif: ACCGGAWRTN	0.86747	0.00977597	9.42567e-06	166	144	14730	TF:M01981	TF	21866	910
7	Factor: CREB,; motif: NTGACGTNA	0.590361	0.0120349	1.15282e-05	166	98	8143	TF:M00981	TF	21866	558
7	Factor: PEA3; motif: RCCGGAAGYN; match class: 1	0.379518	0.0150862	1.35573e-05	166	63	4176	TF:M01991_1	TF	21866	2657
7	Factor: ELF4; motif: CCCGGAARTN	0.542169	0.0125035	1.49358e-05	166	90	7198	TF:M01979	TF	21866	892
7	Factor: CREB; motif: NNGNTGACGTNN	0.403614	0.0145305	1.60773e-05	166	67	4611	TF:M00113	TF	21866	568
7	Factor: CREB,; motif: NTGACGTNA; match class: 1	0.289157	0.0174102	2.18482e-05	166	48	2757	TF:M00981_1	TF	21866	559
7	Factor: YY1; motif: GCCGCCATTTTG	0.493976	0.0127587	5.53626e-05	166	82	6427	TF:M02044	TF	21866	3756
7	Factor: p54NRB; motif: GRNNNMGGATGRMNNCGGA	0.542169	0.0121392	7.23134e-05	166	90	7414	TF:M07611	TF	21866	2592
7	Factor: BEN; motif: CWGCGAYA	0.5	0.0125987	7.70238e-05	166	83	6588	TF:M01241	TF	21866	280
7	Factor: Erm; motif: NCCGGAWGTN	0.427711	0.0134827	0.000107193	166	71	5266	TF:M01992	TF	21866	962
7	Factor: CREB; motif: NSTGACGTMANN	0.421687	0.0134771	0.000145418	166	70	5194	TF:M00178	TF	21866	576
7	Factor: ERG; motif: ACCGGAART	0.638554	0.0110972	0.000155277	166	106	9552	TF:M01752	TF	21866	950
7	Factor: BCL6B; motif: NNNNCCGCCCCWNNNN	0.813253	0.00984037	0.000181331	166	135	13719	TF:M02844	TF	21866	262
7	Factor: Elk-1; motif: NNNNCCGGAARTNN	0.650602	0.0109656	0.000190354	166	108	9849	TF:M00025	TF	21866	904
7	Factor: IRF6; motif: NNNACTCYCGGKNNN	0.801205	0.00989436	0.000222405	166	133	13442	TF:M02874	TF	21866	1766
7	Factor: NRF-1; motif: YGCGCMTGCGC	0.228916	0.0184198	0.000256534	166	38	2063	TF:M02102	TF	21866	2444
7	Factor: ATF-1; motif: TNACGTCAN	0.475904	0.0125536	0.000268669	166	79	6293	TF:M01861	TF	21866	198
7	Factor: GABPalpha; motif: ACCGGAARYN	0.46988	0.0126193	0.000276072	166	78	6181	TF:M02039	TF	21866	1228
7	Factor: E2F-4; motif: NTTTCSCGCC; match class: 1	0.427711	0.0131628	0.000291722	166	71	5394	TF:M07380_1	TF	21866	761
7	Factor: CREB; motif: NSTGACGTMANN; match class: 1	0.192771	0.0204604	0.000293006	166	32	1564	TF:M00178_1	TF	21866	577
7	Factor: CREB1; motif: NNNNACGTCANN	0.361446	0.0142383	0.000316469	166	60	4214	TF:M03544	TF	21866	548
7	Factor: SAP-1a; motif: NRRCCGGAAGYRN; match class: 1	0.307229	0.0154358	0.000336801	166	51	3304	TF:M10220_1	TF	21866	2993
7	Factor: BEN; motif: CAGCGRNV; match class: 1	0.740964	0.010227	0.000349286	166	123	12027	TF:M01240_1	TF	21866	279
7	Factor: SP100; motif: NNCGTCGNNTAAWNN	0.584337	0.011389	0.000351769	166	97	8517	TF:M02913	TF	21866	3218
7	Factor: NRF-1; motif: CGCATGCGCR	0.186747	0.0206667	0.000377161	166	31	1500	TF:M00652	TF	21866	2442
7	Factor: ZF5; motif: NRNGNGCGCGCWN; match class: 1	0.704819	0.0104232	0.000472403	166	117	11225	TF:M00333_1	TF	21866	3827
7	Factor: YY1; motif: GCCGCCATTTTG; match class: 1	0.156627	0.0230701	0.000509134	166	26	1127	TF:M02044_1	TF	21866	3757
7	Factor: ATF-2; motif: NNTGACGTCAN	0.355422	0.0141521	0.000524844	166	59	4169	TF:M07312	TF	21866	204
7	Factor: ERG; motif: ACCGGAART; match class: 1	0.325301	0.014734	0.000585712	166	54	3665	TF:M01752_1	TF	21866	951
7	Factor: TEL1; motif: CNCGGAANNN	0.668675	0.0106271	0.000623034	166	111	10445	TF:M01993	TF	21866	3616
7	Factor: Elk-1; motif: NNNNCCGGAARTNN; match class: 1	0.349398	0.0141879	0.000640444	166	58	4088	TF:M00025_1	TF	21866	905
7	Factor: c-ets-1; motif: ACCGGAWRYN; match class: 1	0.277108	0.015939	0.000664312	166	46	2886	TF:M01986_1	TF	21866	453
7	Factor: Elk-1; motif: NCCGGAAGTGN	0.837349	0.00952838	0.000757685	166	139	14588	TF:M10219	TF	21866	912
7	Factor: ATF2; motif: VGTGACGTMACN; match class: 1	0.204819	0.0188261	0.00079633	166	34	1806	TF:M00179_1	TF	21866	565
7	Factor: Ets2; motif: ACCGGAWRYN; match class: 1	0.26506	0.0162182	0.000798154	166	44	2713	TF:M01989_1	TF	21866	457
7	Factor: CREB; motif: CNNTGACGTMA	0.433735	0.0127614	0.000798706	166	72	5642	TF:M00917	TF	21866	578
7	Factor: Kaiso; motif: SARNYCTCGCGAGAN	0.795181	0.00976331	0.000889622	166	132	13520	TF:M10276	TF	21866	3790
7	Factor: ATF-1; motif: TNACGTCAN; match class: 1	0.210843	0.0184017	0.000895142	166	35	1902	TF:M01861_1	TF	21866	199
7	Factor: ATF-1; motif: NNNTGACGTNNN	0.361446	0.0138185	0.000913259	166	60	4342	TF:M07034	TF	21866	194
7	Factor: CREM; motif: TGACGTCASYN; match class: 1	0.204819	0.0187019	0.000926635	166	34	1818	TF:M01820_1	TF	21866	587
7	Factor: CREB1; motif: NNNNTGACGTNANNN	0.361446	0.013809	0.00093557	166	60	4345	TF:M07248	TF	21866	546
7	Factor: ATF2; motif: VGTGACGTMACN	0.451807	0.0124647	0.00100502	166	75	6017	TF:M00179	TF	21866	564
7	Factor: ER81; motif: RCCGGAWRYN	0.343373	0.0141089	0.00102664	166	57	4040	TF:M01987	TF	21866	934
7	Factor: ESE-1; motif: NSMGGAARYN; match class: 1	0.240964	0.0168776	0.0011119	166	40	2370	TF:M01977_1	TF	21866	985
7	Factor: SAP-1a; motif: NRRCCGGAAGYRN	0.60241	0.0109601	0.00140037	166	100	9124	TF:M10220	TF	21866	2992
7	Factor: CREB; motif: NNTKACGTCANNNS; match class: 1	0.198795	0.0186335	0.00151591	166	33	1771	TF:M00916_1	TF	21866	573
7	Factor: ER71; motif: ACCGGAARYN	0.355422	0.0136732	0.0017183	166	59	4315	TF:M01988	TF	21866	926
7	Factor: nerf; motif: NCCGGAARTN	0.26506	0.015765	0.00173629	166	44	2791	TF:M01976	TF	21866	2238
7	Factor: ATF-3; motif: SNTGACGYNATN	0.271084	0.0155548	0.00182529	166	45	2893	TF:M07313	TF	21866	214
7	Factor: E2F-1; motif: NNNSSCGCSAANN	0.596386	0.010938	0.00195504	166	99	9051	TF:M07250	TF	21866	736
7	Factor: CREB; motif: TGACGTMA	0.415663	0.0127025	0.00200122	166	69	5432	TF:M00039	TF	21866	566
7	Factor: c-Ets-1; motif: NNNRCCGGAWRYNNNN; match class: 1	0.23494	0.0166595	0.0021904	166	39	2341	TF:M01078_1	TF	21866	451
7	Factor: Pax-3; motif: NNNNNNCGTCACGSTYNNNNN	0.76506	0.00982364	0.00220995	166	127	12928	TF:M00327	TF	21866	2612
7	Factor: BEN; motif: CAGCGRNV	0.891566	0.00909482	0.0022425	166	148	16273	TF:M01240	TF	21866	278
7	Factor: CREB; motif: NNTKACGTCANNNS	0.439759	0.0123311	0.00250513	166	73	5920	TF:M00916	TF	21866	572
7	Factor: E2F-7; motif: GRGGCGGGAANNN	0.548193	0.0111986	0.00333705	166	91	8126	TF:M10212	TF	21866	766
7	Factor: CREB; motif: NSTGACGTAANN	0.391566	0.0128281	0.0035852	166	65	5067	TF:M00177	TF	21866	570
7	Factor: IRF4; motif: NNNAYTCTCGGWNNN; match class: 1	0.548193	0.0111794	0.00362665	166	91	8140	TF:M02872_1	TF	21866	1749
7	Factor: CREB; motif: TGACGTMA; match class: 1	0.180723	0.0188917	0.00385803	166	30	1588	TF:M00039_1	TF	21866	567
7	Factor: GABP-alpha; motif: GGNRCCGGAAGTGN	0.331325	0.0137397	0.00413853	166	55	4003	TF:M10247	TF	21866	1230
7	Factor: Elf-1; motif: NNANCCGGAAGTGN	0.277108	0.0148916	0.0044707	166	46	3089	TF:M10216	TF	21866	884
7	Factor: CREB; motif: NSTGACGTAANN; match class: 1	0.162651	0.0199115	0.00497713	166	27	1356	TF:M00177_1	TF	21866	571
7	Factor: ERF; motif: ACCGGAARTN	0.439759	0.0121122	0.00508598	166	73	6027	TF:M01984	TF	21866	948
7	Factor: ERF; motif: ACCGGAARTN; match class: 1	0.180723	0.0185874	0.00534173	166	30	1614	TF:M01984_1	TF	21866	949
7	Factor: Pax-3; motif: NNNNNNCGTCACGSTYNNNNN; match class: 1	0.445783	0.0119625	0.00668815	166	74	6186	TF:M00327_1	TF	21866	2613
7	Factor: Egr-2; motif: NTGCGTRGGCGK	0.403614	0.012442	0.00684105	166	67	5385	TF:M00246	TF	21866	838
7	Factor: LKLF; motif: NGGGCGG	0.5	0.0114199	0.00711941	166	83	7268	TF:M05391	TF	21866	1916
7	Factor: Sp3; motif: AGGGCGG	0.5	0.0114199	0.00711941	166	83	7268	TF:M05665	TF	21866	3244
7	Factor: CPBP; motif: NGGGCGG	0.5	0.0114199	0.00711941	166	83	7268	TF:M05301	TF	21866	540
7	Factor: SP6; motif: WGGGCGG	0.5	0.0114199	0.00711941	166	83	7268	TF:M05455	TF	21866	3264
7	Factor: Egr-3; motif: NTGCGTGGGCGK	0.439759	0.0119947	0.00742909	166	73	6086	TF:M00245	TF	21866	850
7	Factor: TEL1; motif: CNCGGAANNN; match class: 1	0.349398	0.0131639	0.0077079	166	58	4406	TF:M01993_1	TF	21866	3617
7	Factor: E2F-3; motif: GGCGGGN	0.686747	0.0100858	0.00785367	166	114	11303	TF:M02089	TF	21866	752
7	Factor: NRF-1; motif: GCGCMTGCGCN	0.198795	0.0172054	0.00847504	166	33	1918	TF:M07052	TF	21866	2440
7	Factor: E2F-1; motif: NKTSSCGC	0.53012	0.0110999	0.00931353	166	88	7928	TF:M00428	TF	21866	730
7	Factor: BCL6B; motif: NNNNCCGCCCCWNNNN; match class: 1	0.560241	0.0108645	0.00956348	166	93	8560	TF:M02844_1	TF	21866	263
7	Factor: Pet-1; motif: ACCGGAARYN	0.26506	0.0147651	0.00984978	166	44	2980	TF:M02037	TF	21866	2668
7	Factor: Kaiso; motif: SARNYCTCGCGAGAN; match class: 1	0.626506	0.0104083	0.00988957	166	104	9992	TF:M10276_1	TF	21866	3791
7	Factor: CREB; motif: CGTCAN	0.337349	0.0132419	0.0102204	166	56	4229	TF:M00801	TF	21866	574
7	Factor: CREB; motif: CNNTGACGTMA; match class: 1	0.180723	0.0179856	0.0102358	166	30	1668	TF:M00917_1	TF	21866	579
7	Factor: CREB1; motif: NRRTGACGTMA	0.361446	0.012848	0.010688	166	60	4670	TF:M10200	TF	21866	544
7	Factor: Egr-2; motif: GCGTGGGCGG	0.493976	0.011301	0.0135504	166	82	7256	TF:M05494	TF	21866	840
7	Factor: ELF1; motif: NCCGGAARTN	0.26506	0.0145599	0.0141073	166	44	3022	TF:M01975	TF	21866	880
7	Factor: EHF; motif: CSCGGAARTN	0.475904	0.0114393	0.014574	166	79	6906	TF:M01974	TF	21866	866
7	Factor: ERG; motif: ACCGGAARYN	0.240964	0.0151976	0.014825	166	40	2632	TF:M01985	TF	21866	952
7	Factor: Elf5; motif: CSMGGAARTN	0.439759	0.0117401	0.0168475	166	73	6218	TF:M01980	TF	21866	896
7	Factor: E2F; motif: GGCGSG; match class: 1	0.481928	0.0113266	0.0180213	166	80	7063	TF:M00803_1	TF	21866	775
7	Factor: CREB1; motif: NNNNTGACGTNANNN; match class: 1	0.150602	0.0190259	0.0257122	166	25	1314	TF:M07248_1	TF	21866	547
7	Factor: Ehf; motif: NNNANCCGGAAGTNN	0.307229	0.0133333	0.026371	166	51	3825	TF:M02745	TF	21866	868
7	Factor: Elf-1; motif: AWCCCGGAAGTN	0.542169	0.0107553	0.0266537	166	90	8368	TF:M07415	TF	21866	882
7	Factor: ETV3; motif: ANCGGAARYN	0.271084	0.0140274	0.0281575	166	45	3208	TF:M01990	TF	21866	1024
7	Factor: ATF4; motif: CVTGACGYMABG	0.391566	0.0120594	0.0306082	166	65	5390	TF:M00514	TF	21866	220
7	Factor: MOVO-B; motif: GNGGGGG	0.506024	0.0109603	0.03381	166	84	7664	TF:M01104	TF	21866	2110
7	Factor: Hes1; motif: NNCACGYGNN	0.837349	0.00910043	0.0350057	166	139	15274	TF:M07991	TF	21866	1436
7	Factor: TAFII250; motif: NAARAWGGCGGMGG; match class: 1	0.138554	0.0195745	0.0368652	166	23	1175	TF:M10388_1	TF	21866	3437
7	Factor: E2F-1; motif: NKTSSCGC; match class: 1	0.253012	0.0143003	0.0369413	166	42	2937	TF:M00428_1	TF	21866	731
7	Factor: NRF-1; motif: CNSTGCGCATGCGCNNS	0.126506	0.0207305	0.0370189	166	21	1013	TF:M10328	TF	21866	2438
7	Factor: Pax-5; motif: RRMSWGANWYCTNRAGCGKRACSRYNSM; match class: 1	0.39759	0.011922	0.0371548	166	66	5536	TF:M00144_1	TF	21866	2625
7	Factor: Pax-5; motif: RRMSWGANWYCTNRAGCGKRACSRYNSM	0.704819	0.00972488	0.038746	166	117	12031	TF:M00144	TF	21866	2624
7	Factor: ATF-2; motif: NNTGACGTCAN; match class: 1	0.144578	0.0190024	0.0391629	166	24	1263	TF:M07312_1	TF	21866	205
7	Factor: ELF4; motif: CCCGGAARTN; match class: 1	0.210843	0.0154662	0.0419212	166	35	2263	TF:M01979_1	TF	21866	893
7	Factor: ATF-1; motif: NNNTGACGTNNN; match class: 1	0.144578	0.0188976	0.0427826	166	24	1270	TF:M07034_1	TF	21866	195
7	Factor: SAP-1a; motif: NACCGGAAGTV	0.204819	0.0156178	0.045748	166	34	2177	TF:M01167	TF	21866	2988
7	Factor: LKLF; motif: NGGGCGG; match class: 1	0.216867	0.0151899	0.0462066	166	36	2370	TF:M05391_1	TF	21866	1917
7	Factor: CPBP; motif: NGGGCGG; match class: 1	0.216867	0.0151899	0.0462066	166	36	2370	TF:M05301_1	TF	21866	541
7	Factor: SP6; motif: WGGGCGG; match class: 1	0.216867	0.0151899	0.0462066	166	36	2370	TF:M05455_1	TF	21866	3265
7	Factor: Sp3; motif: AGGGCGG; match class: 1	0.216867	0.0151899	0.0462066	166	36	2370	TF:M05665_1	TF	21866	3245
7	Factor: YY1; motif: CAARATGGCGGC	0.373494	0.0121165	0.0466071	166	62	5117	TF:M10408	TF	21866	3758
7	Factor: ATF-4; motif: KACGTCAKS	0.385542	0.0119649	0.0479624	166	64	5349	TF:M01864	TF	21866	224
7	Factor: E2F-1; motif: TTGGCGCGRAANNGNM	0.379518	0.0120275	0.0488336	166	63	5238	TF:M00938	TF	21866	732
7	Cytoplasmic ribosomal proteins	0.25	0.298701	3.22764e-20	92	23	77	WP:WP163	WP	4531	110
7	Electron transport chain	0.228261	0.228261	1.17455e-15	92	21	92	WP:WP295	WP	4531	5
7	Oxidative phosphorylation	0.141304	0.240741	1.12277e-09	92	13	54	WP:WP1248	WP	4531	98
8	Metallothionein-3 complex	0.5	0.333333	0.00206938	4	2	6	CORUM:676	CORUM	1082	103
8	myelin sheath	0.35	0.0333333	1.52436e-08	20	7	210	GO:0043209	GO:CC	27262	1877
8	cytoplasm	0.95	0.00163511	0.000159596	20	19	11620	GO:0005737	GO:CC	27262	309
8	cytosol	0.6	0.00290768	0.000800068	20	12	4127	GO:0005829	GO:CC	27262	380
8	neuron projection	0.35	0.00428659	0.0155806	20	7	1633	GO:0043005	GO:CC	27262	1851
8	intracellular anatomical structure	1	0.00114253	0.0207917	20	20	17505	GO:0005622	GO:CC	27262	237
8	catalytic complex	0.35	0.00391718	0.0274072	20	7	1787	GO:1902494	GO:CC	27262	3620
8	axon	0.25	0.00628931	0.0329743	20	5	795	GO:0030424	GO:CC	27262	935
8	organelle membrane	0.45	0.00272727	0.0388317	20	9	3300	GO:0031090	GO:CC	27262	1048
8	mitochondrion	0.35	0.0035879	0.04721	20	7	1951	GO:0005739	GO:CC	27262	310
8	thioredoxin peroxidase activity	0.1	0.333333	0.00239985	20	2	6	GO:0008379	GO:MF	25177	1675
8	thioredoxin-dependent peroxiredoxin activity	0.1	0.285714	0.00335819	20	2	7	GO:0140824	GO:MF	25177	10827
8	peroxiredoxin activity	0.1	0.2	0.00718584	20	2	10	GO:0051920	GO:MF	25177	8140
8	kinase binding	0.3	0.00692042	0.0112235	20	6	867	GO:0019900	GO:MF	25177	3755
8	protein-containing complex binding	0.35	0.00448143	0.0353014	20	7	1562	GO:0044877	GO:MF	25177	6099
8	Bacterial invasion of epithelial cells	0.230769	0.04	0.00859743	13	3	75	KEGG:05100	KEGG	8947	416
8	Leukocyte transendothelial migration	0.230769	0.025641	0.0319703	13	3	117	KEGG:04670	KEGG	8947	337
8	Platelet activation	0.230769	0.0241935	0.0378906	13	3	124	KEGG:04611	KEGG	8947	315
8	Yersinia infection	0.230769	0.0222222	0.0485413	13	3	135	KEGG:05135	KEGG	8947	425
8	PI3K/AKT activation	0.117647	0.25	0.0255079	17	2	8	REAC:R-MMU-198203	REAC	8362	993
8	Factor: ZF5; motif: GYCGCGCARNGCNN	0.95	0.0019937	0.00131391	20	19	9530	TF:M02933	TF	21866	3838
8	Factor: NRF-1; motif: YGCGCMTGCGC	0.5	0.00484731	0.00335443	20	10	2063	TF:M02102	TF	21866	2444
8	Factor: ELK-1; motif: ACCGGAWRTN; match class: 1	0.9	0.00199203	0.00695672	20	18	9036	TF:M01981_1	TF	21866	911
8	Factor: E2F; motif: GGCGSG	0.95	0.00181818	0.00706334	20	19	10450	TF:M00803	TF	21866	774
8	Factor: c-ets-1; motif: ACCGGAWRYN; match class: 1	0.55	0.0038115	0.00891618	20	11	2886	TF:M01986_1	TF	21866	453
8	Factor: FXR:RXR; motif: RGGTCANTGACCTN	0.45	0.00495868	0.0106711	20	9	1815	TF:M07256	TF	21866	1220
8	Factor: NRF-1; motif: GCGCMTGCGCN	0.45	0.00469239	0.0166989	20	9	1918	TF:M07052	TF	21866	2440
8	Factor: Zfp536; motif: NCGGAKG	0.75	0.00236518	0.0220513	20	15	6342	TF:M05541	TF	21866	3968
9	localization	0.604396	0.0100164	9.00312e-14	91	55	5491	GO:0051179	GO:BP	27205	14323
9	establishment of localization	0.56044	0.0105743	3.71263e-13	91	51	4823	GO:0051234	GO:BP	27205	14353
9	transport	0.549451	0.0107204	5.36441e-13	91	50	4664	GO:0006810	GO:BP	27205	2546
9	nervous system development	0.373626	0.0133072	8.74069e-10	91	34	2555	GO:0007399	GO:BP	27205	2969
9	cellular localization	0.428571	0.0111716	2.05363e-09	91	39	3491	GO:0051641	GO:BP	27205	14642
9	negative regulation of cellular process	0.505495	0.00924623	5.23499e-09	91	46	4975	GO:0048523	GO:BP	27205	13544
9	negative regulation of biological process	0.549451	0.00833333	1.47228e-08	91	50	6000	GO:0048519	GO:BP	27205	13540
9	cell death	0.32967	0.013292	3.49277e-08	91	30	2257	GO:0008219	GO:BP	27205	3218
9	regulation of localization	0.32967	0.0130833	5.17572e-08	91	30	2293	GO:0032879	GO:BP	27205	8303
9	transmembrane transport	0.263736	0.0152188	4.16484e-07	91	24	1577	GO:0055085	GO:BP	27205	15067
9	organic substance transport	0.351648	0.0112795	4.20675e-07	91	32	2837	GO:0071702	GO:BP	27205	17820
9	neurogenesis	0.285714	0.0138963	4.4074e-07	91	26	1871	GO:0022008	GO:BP	27205	6923
9	establishment of localization in cell	0.307692	0.0127447	5.36569e-07	91	28	2197	GO:0051649	GO:BP	27205	14650
9	central nervous system development	0.21978	0.0185701	5.86171e-07	91	20	1077	GO:0007417	GO:BP	27205	2983
9	generation of neurons	0.263736	0.0147149	8.21632e-07	91	24	1631	GO:0048699	GO:BP	27205	13696
9	regulation of transport	0.285714	0.0134715	8.59597e-07	91	26	1930	GO:0051049	GO:BP	27205	14219
9	positive regulation of cellular process	0.516484	0.00783725	1.0023e-06	91	47	5997	GO:0048522	GO:BP	27205	13543
9	neuron differentiation	0.252747	0.014791	1.8661e-06	91	23	1555	GO:0030182	GO:BP	27205	7062
9	monoatomic ion transport	0.230769	0.0163934	1.86711e-06	91	21	1281	GO:0006811	GO:BP	27205	2547
9	response to stress	0.417582	0.00914341	1.90685e-06	91	38	4156	GO:0006950	GO:BP	27205	2640
9	biological regulation	0.813187	0.00534759	2.59948e-06	91	74	13838	GO:0065007	GO:BP	27205	16811
9	regulation of biological quality	0.362637	0.0101726	2.86754e-06	91	33	3244	GO:0065008	GO:BP	27205	16812
9	programmed cell death	0.285714	0.0125181	4.08712e-06	91	26	2077	GO:0012501	GO:BP	27205	4688
9	vesicle-mediated transport	0.252747	0.0138805	6.28471e-06	91	23	1657	GO:0016192	GO:BP	27205	5292
9	neuron projection development	0.208791	0.0171171	6.62997e-06	91	19	1110	GO:0031175	GO:BP	27205	7471
9	regulation of cell death	0.263736	0.0130719	8.59847e-06	91	24	1836	GO:0010941	GO:BP	27205	4635
9	amyloid precursor protein metabolic process	0.0769231	0.0933333	1.05389e-05	91	7	75	GO:0042982	GO:BP	27205	11047
9	positive regulation of biological process	0.527473	0.00713012	1.54396e-05	91	48	6732	GO:0048518	GO:BP	27205	13539
9	negative regulation of amyloid precursor protein catabolic process	0.0549451	0.227273	1.62633e-05	91	5	22	GO:1902992	GO:BP	27205	23741
9	regulation of response to stress	0.230769	0.0143149	2.04113e-05	91	21	1467	GO:0080134	GO:BP	27205	18808
9	monoatomic cation transport	0.197802	0.0169332	2.14699e-05	91	18	1063	GO:0006812	GO:BP	27205	2548
9	nitrogen compound transport	0.274725	0.0119161	2.4349e-05	91	25	2098	GO:0071705	GO:BP	27205	17823
9	cellular component organization or biogenesis	0.571429	0.00663689	2.57598e-05	91	52	7835	GO:0071840	GO:BP	27205	17895
9	regulation of biological process	0.78022	0.00528903	2.99084e-05	91	71	13424	GO:0050789	GO:BP	27205	14004
9	developmental process	0.527473	0.00699199	3.02347e-05	91	48	6865	GO:0032502	GO:BP	27205	8032
9	regulation of signaling	0.362637	0.0092437	3.20415e-05	91	33	3570	GO:0023051	GO:BP	27205	7001
9	regulation of cell communication	0.362637	0.00923335	3.29422e-05	91	33	3574	GO:0010646	GO:BP	27205	4388
9	cellular component organization	0.56044	0.00668064	3.33721e-05	91	51	7634	GO:0016043	GO:BP	27205	5200
9	response to organic substance	0.362637	0.00921016	3.50568e-05	91	33	3583	GO:0010033	GO:BP	27205	3923
9	head development	0.175824	0.0188235	3.6094e-05	91	16	850	GO:0060322	GO:BP	27205	15367
9	organonitrogen compound metabolic process	0.505495	0.00708892	5.20107e-05	91	46	6489	GO:1901564	GO:BP	27205	22563
9	neuron development	0.208791	0.0150079	5.47788e-05	91	19	1266	GO:0048666	GO:BP	27205	13664
9	regulation of response to stimulus	0.384615	0.00862919	5.66173e-05	91	35	4056	GO:0048583	GO:BP	27205	13594
9	behavior	0.164835	0.0197368	5.66198e-05	91	15	760	GO:0007610	GO:BP	27205	3139
9	regulation of cellular process	0.736264	0.00544361	6.04348e-05	91	67	12308	GO:0050794	GO:BP	27205	14008
9	organic anion transport	0.131868	0.0264901	6.5157e-05	91	12	453	GO:0015711	GO:BP	27205	4953
9	regulation of protein metabolic process	0.296703	0.0105592	6.94171e-05	91	27	2557	GO:0051246	GO:BP	27205	14362
9	system development	0.384615	0.00850547	8.20208e-05	91	35	4115	GO:0048731	GO:BP	27205	13728
9	protein localization	0.296703	0.0104611	8.42963e-05	91	27	2581	GO:0008104	GO:BP	27205	3195
9	cellular macromolecule localization	0.296703	0.0104287	8.98855e-05	91	27	2589	GO:0070727	GO:BP	27205	17211
9	regulation of molecular function	0.296703	0.0104247	9.0608e-05	91	27	2590	GO:0065009	GO:BP	27205	16813
9	cell adhesion	0.21978	0.0136705	0.000103807	91	20	1463	GO:0007155	GO:BP	27205	2782
9	brain development	0.164835	0.0188206	0.00010533	91	15	797	GO:0007420	GO:BP	27205	2986
9	plasma membrane bounded cell projection organization	0.230769	0.0128598	0.000128329	91	21	1633	GO:0120036	GO:BP	27205	20549
9	carboxylic acid transport	0.120879	0.0282051	0.000133559	91	11	390	GO:0046942	GO:BP	27205	13168
9	organic acid transport	0.120879	0.0280612	0.000140628	91	11	392	GO:0015849	GO:BP	27205	5080
9	amino acid transport	0.0879121	0.0487805	0.000140805	91	8	164	GO:0006865	GO:BP	27205	2583
9	anatomical structure development	0.483516	0.00706487	0.000152849	91	44	6228	GO:0048856	GO:BP	27205	13840
9	regulation of cellular localization	0.186813	0.0157553	0.000163187	91	17	1079	GO:0060341	GO:BP	27205	15386
9	multicellular organism development	0.417582	0.00779807	0.000165566	91	38	4873	GO:0007275	GO:BP	27205	2871
9	cell projection organization	0.230769	0.0125824	0.000185372	91	21	1669	GO:0030030	GO:BP	27205	7016
9	cell projection morphogenesis	0.153846	0.0194444	0.000204801	91	14	720	GO:0048858	GO:BP	27205	13842
9	macromolecule localization	0.318681	0.00941558	0.000226182	91	29	3080	GO:0033036	GO:BP	27205	8425
9	response to oxygen-containing compound	0.263736	0.0110041	0.00023005	91	24	2181	GO:1901700	GO:BP	27205	22661
9	learning or memory	0.10989	0.0308642	0.000236056	91	10	324	GO:0007611	GO:BP	27205	3140
9	apoptotic process	0.252747	0.0113861	0.000244784	91	23	2020	GO:0006915	GO:BP	27205	2620
9	cellular component morphogenesis	0.164835	0.0176263	0.000245816	91	15	851	GO:0032989	GO:BP	27205	8397
9	export from cell	0.175824	0.0163432	0.000250356	91	16	979	GO:0140352	GO:BP	27205	20837
9	establishment of protein localization	0.230769	0.0122664	0.000283893	91	21	1712	GO:0045184	GO:BP	27205	12003
9	regulation of amyloid-beta formation	0.0549451	0.131579	0.000297189	91	5	38	GO:1902003	GO:BP	27205	22950
9	cell part morphogenesis	0.153846	0.0186418	0.000341786	91	14	751	GO:0032990	GO:BP	27205	8398
9	regulation of cellular component organization	0.285714	0.0100697	0.000344676	91	26	2582	GO:0051128	GO:BP	27205	14274
9	monoatomic ion transmembrane transport	0.175824	0.015748	0.000412586	91	16	1016	GO:0034220	GO:BP	27205	8951
9	positive regulation of signaling	0.241758	0.0113052	0.000552871	91	22	1946	GO:0023056	GO:BP	27205	7003
9	positive regulation of cell communication	0.241758	0.0112994	0.000557751	91	22	1947	GO:0010647	GO:BP	27205	4389
9	cognition	0.10989	0.0277778	0.000622608	91	10	360	GO:0050890	GO:BP	27205	14087
9	negative regulation of cell death	0.186813	0.0142498	0.000673538	91	17	1193	GO:0060548	GO:BP	27205	15578
9	cell junction organization	0.153846	0.0175439	0.000709716	91	14	798	GO:0034330	GO:BP	27205	9021
9	regulation of amyloid precursor protein catabolic process	0.0549451	0.111111	0.000710162	91	5	45	GO:1902991	GO:BP	27205	23740
9	regulation of catalytic activity	0.230769	0.0115766	0.00074002	91	21	1814	GO:0050790	GO:BP	27205	14005
9	negative regulation of amyloid-beta formation	0.043956	0.210526	0.000753238	91	4	19	GO:1902430	GO:BP	27205	23313
9	cell differentiation	0.395604	0.00763521	0.000760657	91	36	4715	GO:0030154	GO:BP	27205	7050
9	regulation of programmed cell death	0.21978	0.012012	0.000828304	91	20	1665	GO:0043067	GO:BP	27205	11095
9	response to nitrogen compound	0.197802	0.0132548	0.000837995	91	18	1358	GO:1901698	GO:BP	27205	22659
9	negative regulation of protein metabolic process	0.175824	0.0148976	0.000864869	91	16	1074	GO:0051248	GO:BP	27205	14364
9	cellular developmental process	0.395604	0.00758214	0.000905952	91	36	4748	GO:0048869	GO:BP	27205	13852
9	secretion	0.175824	0.0147601	0.000977731	91	16	1084	GO:0046903	GO:BP	27205	13155
9	amyloid-beta formation	0.0549451	0.104167	0.000987466	91	5	48	GO:0034205	GO:BP	27205	8945
9	neuron projection morphogenesis	0.142857	0.018598	0.000999092	91	13	699	GO:0048812	GO:BP	27205	13798
9	plasma membrane bounded cell projection morphogenesis	0.142857	0.0182073	0.00126738	91	13	714	GO:0120039	GO:BP	27205	20550
9	positive regulation of neuron projection development	0.0879121	0.0363636	0.0013262	91	8	220	GO:0010976	GO:BP	27205	4666
9	response to organonitrogen compound	0.186813	0.0134814	0.00145191	91	17	1261	GO:0010243	GO:BP	27205	4100
9	anatomical structure morphogenesis	0.285714	0.00932903	0.00151505	91	26	2787	GO:0009653	GO:BP	27205	3648
9	amyloid-beta metabolic process	0.0549451	0.0909091	0.00196953	91	5	55	GO:0050435	GO:BP	27205	13929
9	response to organic cyclic compound	0.175824	0.013805	0.00235111	91	16	1159	GO:0014070	GO:BP	27205	4755
9	regulation of multicellular organismal process	0.307692	0.008626	0.00241909	91	28	3246	GO:0051239	GO:BP	27205	14358
9	response to stimulus	0.637363	0.00547376	0.00253036	91	58	10596	GO:0050896	GO:BP	27205	14092
9	regulation of apoptotic process	0.208791	0.011635	0.00272078	91	19	1633	GO:0042981	GO:BP	27205	11046
9	protein catabolic process	0.164835	0.0145631	0.00272487	91	15	1030	GO:0030163	GO:BP	27205	7054
9	synapse organization	0.120879	0.0207156	0.00281968	91	11	531	GO:0050808	GO:BP	27205	14020
9	regulation of secretion	0.142857	0.0169271	0.00284775	91	13	768	GO:0051046	GO:BP	27205	14216
9	amino acid transmembrane transport	0.0659341	0.0555556	0.00297348	91	6	108	GO:0003333	GO:BP	27205	1783
9	amyloid precursor protein catabolic process	0.0549451	0.0833333	0.00305165	91	5	60	GO:0042987	GO:BP	27205	11052
9	cell morphogenesis	0.164835	0.014313	0.00337278	91	15	1048	GO:0000902	GO:BP	27205	249
9	secretion by cell	0.153846	0.0153509	0.00343478	91	14	912	GO:0032940	GO:BP	27205	8354
9	positive regulation of cell projection organization	0.10989	0.0229885	0.00344331	91	10	435	GO:0031346	GO:BP	27205	7532
9	metal ion transport	0.153846	0.0152838	0.00361423	91	14	916	GO:0030001	GO:BP	27205	7008
9	inorganic ion transmembrane transport	0.153846	0.0152505	0.00370706	91	14	918	GO:0098660	GO:BP	27205	19866
9	regulation of neuron projection development	0.120879	0.0201097	0.00375375	91	11	547	GO:0010975	GO:BP	27205	4665
9	receptor-mediated endocytosis	0.0879121	0.0316206	0.00377273	91	8	253	GO:0006898	GO:BP	27205	2608
9	cellular response to stress	0.230769	0.0104218	0.00403309	91	21	2015	GO:0033554	GO:BP	27205	8724
9	cell development	0.296703	0.00860147	0.00423409	91	27	3139	GO:0048468	GO:BP	27205	13507
9	glial cell differentiation	0.0879121	0.0311284	0.00423843	91	8	257	GO:0010001	GO:BP	27205	3901
9	positive regulation of response to stimulus	0.252747	0.00967199	0.00424502	91	23	2378	GO:0048584	GO:BP	27205	13595
9	positive regulation of transport	0.164835	0.0140187	0.00435078	91	15	1070	GO:0051050	GO:BP	27205	14220
9	response to endoplasmic reticulum stress	0.0879121	0.0310078	0.0043622	91	8	258	GO:0034976	GO:BP	27205	9221
9	protein folding	0.0769231	0.0382514	0.0048153	91	7	183	GO:0006457	GO:BP	27205	2254
9	inorganic cation transmembrane transport	0.142857	0.0160891	0.00497008	91	13	808	GO:0098662	GO:BP	27205	19868
9	protein metabolic process	0.417582	0.00684192	0.00505068	91	38	5554	GO:0019538	GO:BP	27205	6189
9	cellular process	0.945055	0.00414838	0.00510756	91	86	20731	GO:0009987	GO:BP	27205	3889
9	regulation of signal transduction	0.285714	0.00871898	0.00541031	91	26	2982	GO:0009966	GO:BP	27205	3882
9	learning	0.0769231	0.037234	0.00575526	91	7	188	GO:0007612	GO:BP	27205	3141
9	positive regulation of cellular component organization	0.175824	0.0128411	0.00597516	91	16	1246	GO:0051130	GO:BP	27205	14276
9	gliogenesis	0.0989011	0.0249307	0.00599375	91	9	361	GO:0042063	GO:BP	27205	10516
9	modulation of chemical synaptic transmission	0.131868	0.0172166	0.00623585	91	12	697	GO:0050804	GO:BP	27205	14016
9	regulation of trans-synaptic signaling	0.131868	0.017192	0.00632774	91	12	698	GO:0099177	GO:BP	27205	20147
9	response to external stimulus	0.296703	0.00840598	0.00656933	91	27	3212	GO:0009605	GO:BP	27205	3610
9	intracellular transport	0.197802	0.0114577	0.00666976	91	18	1571	GO:0046907	GO:BP	27205	13156
9	regulation of protein localization	0.153846	0.014433	0.0070057	91	14	970	GO:0032880	GO:BP	27205	8304
9	decidualization	0.043956	0.121212	0.00767242	91	4	33	GO:0046697	GO:BP	27205	13035
9	monoatomic cation transmembrane transport	0.142857	0.0154578	0.00767769	91	13	841	GO:0098655	GO:BP	27205	19861
9	regulation of vesicle-mediated transport	0.120879	0.0186441	0.00773427	91	11	590	GO:0060627	GO:BP	27205	15648
9	Golgi vesicle transport	0.0879121	0.0286738	0.00777044	91	8	279	GO:0048193	GO:BP	27205	13306
9	protein transport	0.197802	0.0112711	0.00837824	91	18	1597	GO:0015031	GO:BP	27205	4917
9	receptor clustering	0.0549451	0.0675676	0.00867537	91	5	74	GO:0043113	GO:BP	27205	11121
9	response to chemical	0.417582	0.00669486	0.00868932	91	38	5676	GO:0042221	GO:BP	27205	10621
9	regulation of response to endoplasmic reticulum stress	0.0549451	0.0649351	0.0105569	91	5	77	GO:1905897	GO:BP	27205	26222
9	regulation of plasma membrane bounded cell projection organization	0.131868	0.0162382	0.0112896	91	12	739	GO:0120035	GO:BP	27205	20548
9	neurotransmitter transport	0.0769231	0.0333333	0.0119097	91	7	210	GO:0006836	GO:BP	27205	2562
9	negative regulation of cellular component organization	0.131868	0.0160643	0.0125827	91	12	747	GO:0051129	GO:BP	27205	14275
9	maintenance of protein localization in endoplasmic reticulum	0.032967	0.25	0.0134363	91	3	12	GO:0035437	GO:BP	27205	9521
9	regulation of cell projection organization	0.131868	0.0159363	0.0136364	91	12	753	GO:0031344	GO:BP	27205	7530
9	positive regulation of protein localization	0.10989	0.0195695	0.0142307	91	10	511	GO:1903829	GO:BP	27205	24440
9	membrane organization	0.142857	0.0144124	0.0162763	91	13	902	GO:0061024	GO:BP	27205	16012
9	trans-synaptic signaling	0.142857	0.0144124	0.0162763	91	13	902	GO:0099537	GO:BP	27205	20178
9	organonitrogen compound catabolic process	0.175824	0.0118168	0.0170462	91	16	1354	GO:1901565	GO:BP	27205	22564
9	regulation of neurotransmitter levels	0.0769231	0.0313901	0.0176135	91	7	223	GO:0001505	GO:BP	27205	335
9	negative regulation of response to endoplasmic reticulum stress	0.043956	0.097561	0.0186037	91	4	41	GO:1903573	GO:BP	27205	24222
9	positive regulation of neurofibrillary tangle assembly	0.021978	1	0.0190798	91	2	2	GO:1902998	GO:BP	27205	23747
9	cell activation	0.164835	0.012275	0.0214599	91	15	1222	GO:0001775	GO:BP	27205	454
9	synaptic signaling	0.142857	0.0138151	0.0254794	91	13	941	GO:0099536	GO:BP	27205	20177
9	macromolecule catabolic process	0.175824	0.0114286	0.0257888	91	16	1400	GO:0009057	GO:BP	27205	3309
9	regulation of secretion by cell	0.120879	0.0163447	0.0265576	91	11	673	GO:1903530	GO:BP	27205	24181
9	maternal placenta development	0.043956	0.0888889	0.0270927	91	4	45	GO:0001893	GO:BP	27205	533
9	trans-synaptic signaling, modulating synaptic transmission	0.032967	0.2	0.0275872	91	3	15	GO:0099550	GO:BP	27205	20190
9	negative regulation of glycoprotein metabolic process	0.032967	0.2	0.0275872	91	3	15	GO:1903019	GO:BP	27205	23768
9	positive regulation of signal transduction	0.186813	0.0107937	0.0281456	91	17	1575	GO:0009967	GO:BP	27205	3883
9	regulation of metal ion transport	0.0989011	0.0205479	0.0281936	91	9	438	GO:0010959	GO:BP	27205	4650
9	carboxylic acid transmembrane transport	0.0659341	0.0368098	0.0318377	91	6	163	GO:1905039	GO:BP	27205	25494
9	memory	0.0659341	0.0368098	0.0318377	91	6	163	GO:0007613	GO:BP	27205	3142
9	postsynaptic membrane organization	0.043956	0.0851064	0.032268	91	4	47	GO:0001941	GO:BP	27205	568
9	organic acid transmembrane transport	0.0659341	0.0365854	0.0329586	91	6	164	GO:1903825	GO:BP	27205	24437
9	negative regulation of nitrogen compound metabolic process	0.241758	0.00877893	0.0346127	91	22	2506	GO:0051172	GO:BP	27205	14317
9	regulation of cellular response to stress	0.120879	0.0158273	0.035726	91	11	695	GO:0080135	GO:BP	27205	18809
9	regulation of hydrolase activity	0.142857	0.0132789	0.0385786	91	13	979	GO:0051336	GO:BP	27205	14432
9	animal organ development	0.285714	0.0078172	0.0388942	91	26	3326	GO:0048513	GO:BP	27205	13536
9	response to endogenous stimulus	0.208791	0.00966429	0.0390277	91	19	1966	GO:0009719	GO:BP	27205	3694
9	endocytosis	0.131868	0.0142687	0.0408203	91	12	841	GO:0006897	GO:BP	27205	2607
9	negative regulation of platelet activation	0.032967	0.176471	0.0410298	91	3	17	GO:0010544	GO:BP	27205	4298
9	import into cell	0.0769231	0.027451	0.0418053	91	7	255	GO:0098657	GO:BP	27205	19863
9	vesicle-mediated transport in synapse	0.0769231	0.0273438	0.0428648	91	7	256	GO:0099003	GO:BP	27205	20060
9	myelination	0.0659341	0.0348837	0.0431208	91	6	172	GO:0042552	GO:BP	27205	10819
9	cerebellum morphogenesis	0.043956	0.0784314	0.0447501	91	4	51	GO:0021587	GO:BP	27205	6520
9	ensheathment of neurons	0.0659341	0.0342857	0.0475257	91	6	175	GO:0007272	GO:BP	27205	2869
9	axon ensheathment	0.0659341	0.0342857	0.0475257	91	6	175	GO:0008366	GO:BP	27205	3259
9	localization within membrane	0.120879	0.0153203	0.0481326	91	11	718	GO:0051668	GO:BP	27205	14668
9	endomembrane system	0.628866	0.0142457	2.23273e-23	97	61	4282	GO:0012505	GO:CC	27262	689
9	endoplasmic reticulum	0.402062	0.0205913	4.67995e-18	97	39	1894	GO:0005783	GO:CC	27262	348
9	organelle membrane	0.505155	0.0148485	7.34623e-18	97	49	3300	GO:0031090	GO:CC	27262	1048
9	vesicle	0.402062	0.0174185	1.57104e-15	97	39	2239	GO:0031982	GO:CC	27262	1231
9	membrane	0.804124	0.00756547	2.64187e-15	97	78	10310	GO:0016020	GO:CC	27262	722
9	pigment granule	0.134021	0.125	1.59598e-14	97	13	104	GO:0048770	GO:CC	27262	2248
9	melanosome	0.134021	0.125	1.59598e-14	97	13	104	GO:0042470	GO:CC	27262	1789
9	synapse	0.340206	0.019678	3.96174e-14	97	33	1677	GO:0045202	GO:CC	27262	2147
9	cytoplasmic vesicle	0.371134	0.0172662	6.41469e-14	97	36	2085	GO:0031410	GO:CC	27262	1109
9	intracellular vesicle	0.371134	0.0172414	6.71105e-14	97	36	2088	GO:0097708	GO:CC	27262	3146
9	vacuole	0.226804	0.0340031	2.22249e-13	97	22	647	GO:0005773	GO:CC	27262	340
9	cell periphery	0.639175	0.00879682	9.18926e-13	97	62	7048	GO:0071944	GO:CC	27262	2801
9	organelle subcompartment	0.28866	0.0202752	6.87803e-12	97	28	1381	GO:0031984	GO:CC	27262	1233
9	cytoplasm	0.804124	0.00671256	6.92494e-12	97	78	11620	GO:0005737	GO:CC	27262	309
9	cell junction	0.360825	0.0152572	8.10717e-12	97	35	2294	GO:0030054	GO:CC	27262	871
9	neuron projection	0.309278	0.0183711	8.57646e-12	97	30	1633	GO:0043005	GO:CC	27262	1851
9	somatodendritic compartment	0.257732	0.0223214	2.69321e-11	97	25	1120	GO:0036477	GO:CC	27262	1724
9	bounding membrane of organelle	0.309278	0.0175747	2.72185e-11	97	30	1707	GO:0098588	GO:CC	27262	3225
9	plasma membrane	0.587629	0.00867976	8.38376e-11	97	57	6567	GO:0005886	GO:CC	27262	424
9	lysosome	0.185567	0.0327869	2.32127e-10	97	18	549	GO:0005764	GO:CC	27262	332
9	lytic vacuole	0.185567	0.0327869	2.32127e-10	97	18	549	GO:0000323	GO:CC	27262	53
9	cell surface	0.247423	0.0210711	3.15855e-10	97	24	1139	GO:0009986	GO:CC	27262	663
9	plasma membrane region	0.268041	0.0183099	7.22861e-10	97	26	1420	GO:0098590	GO:CC	27262	3226
9	endoplasmic reticulum subcompartment	0.237113	0.0212963	8.21274e-10	97	23	1080	GO:0098827	GO:CC	27262	3278
9	cell body	0.206186	0.0240385	3.12544e-09	97	20	832	GO:0044297	GO:CC	27262	2056
9	neuronal cell body	0.195876	0.0254692	4.08568e-09	97	19	746	GO:0043025	GO:CC	27262	1853
9	endoplasmic reticulum membrane	0.226804	0.0204842	5.62793e-09	97	22	1074	GO:0005789	GO:CC	27262	354
9	nuclear outer membrane-endoplasmic reticulum membrane network	0.226804	0.0199275	9.56483e-09	97	22	1104	GO:0042175	GO:CC	27262	1782
9	plasma membrane bounded cell projection	0.329897	0.0127135	1.8891e-08	97	32	2517	GO:0120025	GO:CC	27262	3453
9	vacuolar membrane	0.134021	0.0407524	3.12044e-08	97	13	319	GO:0005774	GO:CC	27262	341
9	cell projection	0.329897	0.0122277	5.1431e-08	97	32	2617	GO:0042995	GO:CC	27262	1850
9	dendrite	0.185567	0.0224719	1.12518e-07	97	18	801	GO:0030425	GO:CC	27262	936
9	dendritic tree	0.185567	0.0224159	1.17081e-07	97	18	803	GO:0097447	GO:CC	27262	3014
9	Golgi apparatus	0.247423	0.015676	1.42176e-07	97	24	1531	GO:0005794	GO:CC	27262	358
9	presynapse	0.175258	0.0228495	2.84398e-07	97	17	744	GO:0098793	GO:CC	27262	3265
9	postsynapse	0.185567	0.0207852	3.87373e-07	97	18	866	GO:0098794	GO:CC	27262	3266
9	extracellular region	0.319588	0.0115071	4.86103e-07	97	31	2694	GO:0005576	GO:CC	27262	198
9	axon	0.175258	0.0213836	7.68969e-07	97	17	795	GO:0030424	GO:CC	27262	935
9	smooth endoplasmic reticulum	0.0618557	0.162162	9.86283e-07	97	6	37	GO:0005790	GO:CC	27262	355
9	endosome	0.185567	0.0189873	1.59148e-06	97	18	948	GO:0005768	GO:CC	27262	336
9	dendritic spine	0.103093	0.0444444	2.15732e-06	97	10	225	GO:0043197	GO:CC	27262	1872
9	neuron spine	0.103093	0.04329	2.77296e-06	97	10	231	GO:0044309	GO:CC	27262	2068
9	extracellular space	0.257732	0.0124875	5.82203e-06	97	25	2002	GO:0005615	GO:CC	27262	232
9	glutamatergic synapse	0.14433	0.0229508	9.23109e-06	97	14	610	GO:0098978	GO:CC	27262	3325
9	lytic vacuole membrane	0.103093	0.0378788	9.81718e-06	97	10	264	GO:0098852	GO:CC	27262	3294
9	lysosomal membrane	0.103093	0.0378788	9.81718e-06	97	10	264	GO:0005765	GO:CC	27262	333
9	late endosome	0.103093	0.0369004	1.25529e-05	97	10	271	GO:0005770	GO:CC	27262	338
9	multivesicular body	0.0618557	0.1	1.98862e-05	97	6	60	GO:0005771	GO:CC	27262	339
9	collagen-containing extracellular matrix	0.113402	0.0293333	2.66436e-05	97	11	375	GO:0062023	GO:CC	27262	2367
9	perinuclear region of cytoplasm	0.154639	0.0187266	4.06695e-05	97	15	801	GO:0048471	GO:CC	27262	2238
9	synaptic membrane	0.123711	0.0247423	4.25889e-05	97	12	485	GO:0097060	GO:CC	27262	2907
9	secretory vesicle	0.14433	0.0196906	6.02051e-05	97	14	711	GO:0099503	GO:CC	27262	3373
9	extracellular matrix	0.123711	0.0237154	6.70201e-05	97	12	506	GO:0031012	GO:CC	27262	1031
9	external encapsulating structure	0.123711	0.023622	6.98983e-05	97	12	508	GO:0030312	GO:CC	27262	930
9	endoplasmic reticulum lumen	0.0721649	0.0546875	0.000103132	97	7	128	GO:0005788	GO:CC	27262	353
9	membrane-bounded organelle	0.793814	0.00513573	0.000118255	97	77	14993	GO:0043227	GO:CC	27262	1884
9	cytoplasmic vesicle membrane	0.154639	0.0170261	0.000136368	97	15	881	GO:0030659	GO:CC	27262	951
9	cellular anatomical entity	0.989691	0.00421127	0.000150868	97	96	22796	GO:0110165	GO:CC	27262	3449
9	endoplasmic reticulum protein-containing complex	0.0721649	0.0514706	0.000155595	97	7	136	GO:0140534	GO:CC	27262	3558
9	vesicle membrane	0.154639	0.0166113	0.000185847	97	15	903	GO:0012506	GO:CC	27262	690
9	membrane protein complex	0.175258	0.0140962	0.000302186	97	17	1206	GO:0098796	GO:CC	27262	3267
9	extracellular exosome	0.0618557	0.0588235	0.000474339	97	6	102	GO:0070062	GO:CC	27262	2425
9	intracellular anatomical structure	0.85567	0.0047415	0.000618052	97	83	17505	GO:0005622	GO:CC	27262	237
9	transport vesicle	0.103093	0.0240964	0.00062066	97	10	415	GO:0030133	GO:CC	27262	912
9	intracellular membrane-bounded organelle	0.762887	0.00509712	0.000625936	97	74	14518	GO:0043231	GO:CC	27262	1888
9	endoplasmic reticulum-Golgi intermediate compartment	0.0618557	0.0560748	0.000627594	97	6	107	GO:0005793	GO:CC	27262	357
9	synapse-associated extracellular matrix	0.0309278	0.375	0.00064541	97	3	8	GO:0099535	GO:CC	27262	3379
9	organelle	0.814433	0.00487083	0.00083834	97	79	16219	GO:0043226	GO:CC	27262	1883
9	extracellular vesicle	0.0618557	0.0517241	0.00100425	97	6	116	GO:1903561	GO:CC	27262	3675
9	endosome membrane	0.103093	0.0224215	0.00117437	97	10	446	GO:0010008	GO:CC	27262	667
9	extracellular organelle	0.0618557	0.0487805	0.00140974	97	6	123	GO:0043230	GO:CC	27262	1887
9	extracellular membrane-bounded organelle	0.0618557	0.0487805	0.00140974	97	6	123	GO:0065010	GO:CC	27262	2405
9	GABA-ergic synapse	0.0618557	0.048	0.00154726	97	6	125	GO:0098982	GO:CC	27262	3329
9	excitatory synapse	0.0515464	0.0568182	0.00426161	97	5	88	GO:0060076	GO:CC	27262	2271
9	presynaptic membrane	0.0721649	0.0311111	0.00434704	97	7	225	GO:0042734	GO:CC	27262	1839
9	postsynaptic membrane	0.0824742	0.0240964	0.00670782	97	8	332	GO:0045211	GO:CC	27262	2148
9	autophagosome membrane	0.0412371	0.0833333	0.00694788	97	4	48	GO:0000421	GO:CC	27262	74
9	apical plasma membrane	0.0927835	0.0205011	0.00733547	97	9	439	GO:0016324	GO:CC	27262	734
9	synaptic vesicle	0.0721649	0.0271318	0.0104287	97	7	258	GO:0008021	GO:CC	27262	488
9	presynaptic active zone membrane	0.0412371	0.0727273	0.0119482	97	4	55	GO:0048787	GO:CC	27262	2250
9	presynaptic active zone	0.0515464	0.0454545	0.0125177	97	5	110	GO:0048786	GO:CC	27262	2249
9	neuron to neuron synapse	0.0927835	0.018595	0.0156075	97	9	484	GO:0098984	GO:CC	27262	3331
9	exocytic vesicle	0.0721649	0.0252708	0.0163285	97	7	277	GO:0070382	GO:CC	27262	2478
9	intracellular organelle	0.773196	0.00471965	0.0171172	97	75	15891	GO:0043229	GO:CC	27262	1886
9	secretory granule	0.0927835	0.0182927	0.0176943	97	9	492	GO:0030141	GO:CC	27262	919
9	distal axon	0.0824742	0.0205128	0.0208203	97	8	390	GO:0150034	GO:CC	27262	3593
9	transmembrane transporter complex	0.0824742	0.0204082	0.0215726	97	8	392	GO:1902495	GO:CC	27262	3621
9	clathrin-coated vesicle membrane	0.0412371	0.0571429	0.0308377	97	4	70	GO:0030665	GO:CC	27262	956
9	Schaffer collateral - CA1 synapse	0.0515464	0.0373134	0.0319271	97	5	134	GO:0098685	GO:CC	27262	3252
9	transporter complex	0.0824742	0.0191847	0.0330463	97	8	417	GO:1990351	GO:CC	27262	3868
9	perineuronal net	0.0206186	0.4	0.0332692	97	2	5	GO:0072534	GO:CC	27262	2816
9	multivesicular body, internal vesicle	0.0206186	0.4	0.0332692	97	2	5	GO:0097487	GO:CC	27262	3035
9	apical part of cell	0.0927835	0.0166976	0.035307	97	9	539	GO:0045177	GO:CC	27262	2143
9	transport vesicle membrane	0.0618557	0.0273973	0.0360808	97	6	219	GO:0030658	GO:CC	27262	950
9	late endosome membrane	0.0515464	0.0362319	0.0366549	97	5	138	GO:0031902	GO:CC	27262	1200
9	growth cone	0.0618557	0.0272727	0.036987	97	6	220	GO:0030426	GO:CC	27262	937
9	Golgi membrane	0.0927835	0.0164835	0.0388891	97	9	546	GO:0000139	GO:CC	27262	18
9	postsynaptic density	0.0824742	0.018648	0.0401255	97	8	429	GO:0014069	GO:CC	27262	696
9	site of polarized growth	0.0618557	0.0264317	0.0438475	97	6	227	GO:0030427	GO:CC	27262	938
9	perisynaptic extracellular matrix	0.0206186	0.333333	0.0497879	97	2	6	GO:0098966	GO:CC	27262	3323
9	protein binding	0.786517	0.00667239	6.38387e-10	89	70	10491	GO:0005515	GO:MF	25177	1496
9	protein-containing complex binding	0.280899	0.0160051	5.51688e-08	89	25	1562	GO:0044877	GO:MF	25177	6099
9	binding	0.88764	0.00484782	0.000128046	89	79	16296	GO:0005488	GO:MF	25177	1484
9	amide binding	0.123596	0.0257009	0.000192563	89	11	428	GO:0033218	GO:MF	25177	4543
9	signaling receptor binding	0.235955	0.0123602	0.000200632	89	21	1699	GO:0005102	GO:MF	25177	1281
9	transporter activity	0.191011	0.0145299	0.000359118	89	17	1170	GO:0005215	GO:MF	25177	1358
9	peptide binding	0.101124	0.0266272	0.00181192	89	9	338	GO:0042277	GO:MF	25177	5621
9	amyloid-beta binding	0.0561798	0.0769231	0.0019789	89	5	65	GO:0001540	GO:MF	25177	195
9	transmembrane transporter activity	0.168539	0.0140056	0.00281022	89	15	1071	GO:0022857	GO:MF	25177	3819
9	enzyme binding	0.247191	0.00951146	0.00756493	89	22	2313	GO:0019899	GO:MF	25177	3754
9	proteoglycan binding	0.0449438	0.0930233	0.00931181	89	4	43	GO:0043394	GO:MF	25177	5794
9	kininogen binding	0.0224719	0.5	0.0424112	89	2	4	GO:0030984	GO:MF	25177	4112
9	cell adhesion molecule binding	0.0786517	0.0239726	0.0461897	89	7	292	GO:0050839	GO:MF	25177	7987
9	misfolded protein binding	0.0337079	0.125	0.0470683	89	3	24	GO:0051787	GO:MF	25177	8125
9	Mental deterioration	0.428571	0.0359281	0.000130119	28	12	334	HP:0001268	HP	4965	965
9	Dementia	0.321429	0.0508475	0.000471437	28	9	177	HP:0000726	HP	4965	565
9	Cerebral amyloid angiopathy	0.107143	0.6	0.00257229	28	3	5	HP:0011970	HP	4965	8372
9	Wolff-Parkinson-White syndrome	0.142857	0.173913	0.0107419	28	4	23	HP:0001716	HP	4965	1255
9	Cognitive impairment	0.464286	0.0212418	0.0137929	28	13	612	HP:0100543	HP	4965	15544
9	Ventricular preexcitation	0.142857	0.142857	0.024361	28	4	28	HP:0004309	HP	4965	3010
9	Leber optic atrophy	0.107143	0.3	0.0302889	28	3	10	HP:0001112	HP	4965	872
9	Polyneuropathy	0.178571	0.0806452	0.0327719	28	5	62	HP:0001271	HP	4965	968
9	Lysosome	0.188679	0.0740741	3.81617e-07	53	10	135	KEGG:04142	KEGG	8947	274
9	Protein processing in endoplasmic reticulum	0.150943	0.0467836	0.000499872	53	8	171	KEGG:04141	KEGG	8947	273
9	Antigen processing and presentation	0.0943396	0.060241	0.00955992	53	5	83	KEGG:04612	KEGG	8947	316
9	Platelet degranulation	0.119403	0.0727273	0.000687022	67	8	110	REAC:R-MMU-114608	REAC	8362	1054
9	Response to elevated platelet cytosolic Ca2+	0.119403	0.0701754	0.000899835	67	8	114	REAC:R-MMU-76005	REAC	8362	1290
9	Trafficking and processing of endosomal TLR	0.0447761	0.272727	0.0223964	67	3	11	REAC:R-MMU-1679131	REAC	8362	1576
9	Factor: E2F-1; motif: NNNSSCGCSAANN	0.670103	0.00718153	0.000345637	97	65	9051	TF:M07250	TF	21866	736
9	Factor: E2F-3; motif: GGCGGGN	0.762887	0.00654693	0.00061254	97	74	11303	TF:M02089	TF	21866	752
9	Factor: E2F-1; motif: TTTSGCGS	0.494845	0.00799467	0.00374737	97	48	6004	TF:M00431	TF	21866	740
9	Factor: E2F-1; motif: NNNSSCGCSAANN; match class: 1	0.371134	0.00869355	0.0239544	97	36	4141	TF:M07250_1	TF	21866	737
9	Factor: Kaiso; motif: SARNYCTCGCGAGAN	0.814433	0.0058432	0.0275308	97	79	13520	TF:M10276	TF	21866	3790
9	Factor: FOXN4; motif: NNWANNCGWMCGCGTCNNNNMT; match class: 1	0.783505	0.00593611	0.0357042	97	76	12803	TF:M04662_1	TF	21866	1157
9	Factor: E2F-3; motif: GGCGGGN; match class: 1	0.515464	0.00722752	0.0412545	97	50	6918	TF:M02089_1	TF	21866	753
9	Factor: E2F-1; motif: GNGGGCGGGRMN; match class: 1	0.690722	0.00628695	0.0451901	97	67	10657	TF:M10209_1	TF	21866	729
10	Respiratory chain complex I, mitochondrial	0.375	0.171429	0.000382971	16	6	35	CORUM:381	CORUM	1082	59
10	Respiratory chain complex I, mitochondrial	0.375	0.162162	0.000539642	16	6	37	CORUM:382	CORUM	1082	60
10	organonitrogen compound metabolic process	0.640625	0.00631838	1.68697e-08	64	41	6489	GO:1901564	GO:BP	27205	22563
10	localization	0.5625	0.00655618	4.01983e-07	64	36	5491	GO:0051179	GO:BP	27205	14323
10	transport	0.5	0.00686106	2.91245e-06	64	32	4664	GO:0006810	GO:BP	27205	2546
10	establishment of localization	0.5	0.00663487	6.88013e-06	64	32	4823	GO:0051234	GO:BP	27205	14353
10	generation of precursor metabolites and energy	0.171875	0.0260047	7.1509e-06	64	11	423	GO:0006091	GO:BP	27205	1998
10	regulation of protein metabolic process	0.359375	0.00899492	1.25638e-05	64	23	2557	GO:0051246	GO:BP	27205	14362
10	energy derivation by oxidation of organic compounds	0.15625	0.0283286	1.73094e-05	64	10	353	GO:0015980	GO:BP	27205	5183
10	amyloid precursor protein metabolic process	0.09375	0.08	4.22246e-05	64	6	75	GO:0042982	GO:BP	27205	11047
10	protein metabolic process	0.515625	0.00594166	5.62554e-05	64	33	5554	GO:0019538	GO:BP	27205	6189
10	endoplasmic reticulum tubular network formation	0.046875	0.75	8.85431e-05	64	3	4	GO:0071787	GO:BP	27205	17863
10	neuron recognition	0.078125	0.108696	0.000139598	64	5	46	GO:0008038	GO:BP	27205	3172
10	mitochondrial respiratory chain complex I assembly	0.078125	0.0833333	0.000542304	64	5	60	GO:0032981	GO:BP	27205	8391
10	NADH dehydrogenase complex assembly	0.078125	0.0833333	0.000542304	64	5	60	GO:0010257	GO:BP	27205	4112
10	proton motive force-driven mitochondrial ATP synthesis	0.078125	0.0793651	0.00069416	64	5	63	GO:0042776	GO:BP	27205	10938
10	cellular localization	0.375	0.00687482	0.000914977	64	24	3491	GO:0051641	GO:BP	27205	14642
10	cell death	0.296875	0.00841825	0.00108836	64	19	2257	GO:0008219	GO:BP	27205	3218
10	proton motive force-driven ATP synthesis	0.078125	0.0714286	0.00118025	64	5	70	GO:0015986	GO:BP	27205	5185
10	monoatomic cation transport	0.203125	0.0122295	0.00169363	64	13	1063	GO:0006812	GO:BP	27205	2548
10	ATP metabolic process	0.09375	0.041958	0.00197759	64	6	143	GO:0046034	GO:BP	27205	12513
10	proton transmembrane transport	0.09375	0.0413793	0.0021448	64	6	145	GO:1902600	GO:BP	27205	23418
10	oxidative phosphorylation	0.09375	0.0410959	0.00223263	64	6	146	GO:0006119	GO:BP	27205	2021
10	regulation of protein localization	0.1875	0.0123711	0.00418799	64	12	970	GO:0032880	GO:BP	27205	8304
10	carbohydrate derivative biosynthetic process	0.15625	0.0153846	0.00478937	64	10	650	GO:1901137	GO:BP	27205	22201
10	purine ribonucleoside triphosphate metabolic process	0.09375	0.0359281	0.00487617	64	6	167	GO:0009205	GO:BP	27205	3447
10	cellular respiration	0.109375	0.0265152	0.00517985	64	7	264	GO:0045333	GO:BP	27205	12059
10	regulation of catalytic activity	0.25	0.00882029	0.00582439	64	16	1814	GO:0050790	GO:BP	27205	14005
10	protein transport	0.234375	0.00939261	0.00589144	64	15	1597	GO:0015031	GO:BP	27205	4917
10	purine nucleoside triphosphate metabolic process	0.09375	0.0346821	0.00597968	64	6	173	GO:0009144	GO:BP	27205	3387
10	regulation of localization	0.28125	0.00784998	0.00637359	64	18	2293	GO:0032879	GO:BP	27205	8303
10	ribonucleoside triphosphate metabolic process	0.09375	0.0342857	0.00638972	64	6	175	GO:0009199	GO:BP	27205	3441
10	mitochondrial respiratory chain complex assembly	0.078125	0.0505051	0.00661882	64	5	99	GO:0033108	GO:BP	27205	8471
10	regulation of amyloid precursor protein catabolic process	0.0625	0.0888889	0.00689136	64	4	45	GO:1902991	GO:BP	27205	23740
10	protein localization	0.296875	0.00736149	0.0081145	64	19	2581	GO:0008104	GO:BP	27205	3195
10	protein folding	0.09375	0.0327869	0.00826559	64	6	183	GO:0006457	GO:BP	27205	2254
10	nitrogen compound transport	0.265625	0.00810296	0.00839782	64	17	2098	GO:0071705	GO:BP	27205	17823
10	cellular macromolecule localization	0.296875	0.00733874	0.00849119	64	19	2589	GO:0070727	GO:BP	27205	17211
10	regulation of molecular function	0.296875	0.00733591	0.00853937	64	19	2590	GO:0065009	GO:BP	27205	16813
10	carbohydrate derivative metabolic process	0.1875	0.0115163	0.00872454	64	12	1042	GO:1901135	GO:BP	27205	22199
10	ATP biosynthetic process	0.078125	0.047619	0.00883954	64	5	105	GO:0006754	GO:BP	27205	2506
10	cellular response to norepinephrine stimulus	0.03125	1	0.00972861	64	2	2	GO:0071874	GO:BP	27205	17913
10	nucleoside triphosphate metabolic process	0.09375	0.0309278	0.0115534	64	6	194	GO:0009141	GO:BP	27205	3384
10	regulation of cellular localization	0.1875	0.0111214	0.0124304	64	12	1079	GO:0060341	GO:BP	27205	15386
10	monoatomic ion transport	0.203125	0.0101483	0.0131157	64	13	1281	GO:0006811	GO:BP	27205	2547
10	establishment of protein localization	0.234375	0.00876168	0.0137047	64	15	1712	GO:0045184	GO:BP	27205	12003
10	aerobic respiration	0.09375	0.0298507	0.0141486	64	6	201	GO:0009060	GO:BP	27205	3312
10	purine ribonucleoside triphosphate biosynthetic process	0.078125	0.0431034	0.014394	64	5	116	GO:0009206	GO:BP	27205	3448
10	purine nucleoside triphosphate biosynthetic process	0.078125	0.042735	0.0150095	64	5	117	GO:0009145	GO:BP	27205	3388
10	establishment of localization in cell	0.265625	0.00773782	0.0155276	64	17	2197	GO:0051649	GO:BP	27205	14650
10	neuron projection development	0.1875	0.0108108	0.0165384	64	12	1110	GO:0031175	GO:BP	27205	7471
10	ribonucleoside triphosphate biosynthetic process	0.078125	0.0409836	0.0184025	64	5	122	GO:0009201	GO:BP	27205	3443
10	negative regulation of amyloid-beta formation	0.046875	0.157895	0.0209151	64	3	19	GO:1902430	GO:BP	27205	23313
10	neuron differentiation	0.21875	0.00900322	0.0215756	64	14	1555	GO:0030182	GO:BP	27205	7062
10	amyloid precursor protein catabolic process	0.0625	0.0666667	0.0219658	64	4	60	GO:0042987	GO:BP	27205	11052
10	intracellular transport	0.21875	0.00891152	0.0242131	64	14	1571	GO:0046907	GO:BP	27205	13156
10	endoplasmic reticulum tubular network organization	0.046875	0.15	0.0245647	64	3	20	GO:0071786	GO:BP	27205	17862
10	nucleoside triphosphate biosynthetic process	0.078125	0.037594	0.0279725	64	5	133	GO:0009142	GO:BP	27205	3385
10	response to norepinephrine	0.03125	0.666667	0.0291415	64	2	3	GO:0071873	GO:BP	27205	17912
10	neuromuscular process controlling balance	0.0625	0.0615385	0.0302302	64	4	65	GO:0050885	GO:BP	27205	14082
10	regulation of cell death	0.234375	0.00816993	0.0315319	64	15	1836	GO:0010941	GO:BP	27205	4635
10	organic substance transport	0.296875	0.00669722	0.0317755	64	19	2837	GO:0071702	GO:BP	27205	17820
10	negative regulation of amyloid precursor protein catabolic process	0.046875	0.136364	0.0330725	64	3	22	GO:1902992	GO:BP	27205	23741
10	generation of neurons	0.21875	0.00858369	0.0368358	64	14	1631	GO:0048699	GO:BP	27205	13696
10	aerobic electron transport chain	0.0625	0.057971	0.0383294	64	4	69	GO:0019646	GO:BP	27205	6286
10	head development	0.15625	0.0117647	0.0493843	64	10	850	GO:0060322	GO:BP	27205	15367
10	organelle membrane	0.61194	0.0124242	5.38264e-19	67	41	3300	GO:0031090	GO:CC	27262	1048
10	organelle subcompartment	0.358209	0.0173787	1.98606e-12	67	24	1381	GO:0031984	GO:CC	27262	1233
10	endoplasmic reticulum	0.402985	0.0142555	2.99529e-12	67	27	1894	GO:0005783	GO:CC	27262	348
10	endomembrane system	0.567164	0.00887436	4.08971e-12	67	38	4282	GO:0012505	GO:CC	27262	689
10	endoplasmic reticulum membrane	0.313433	0.0195531	1.51644e-11	67	21	1074	GO:0005789	GO:CC	27262	354
10	endoplasmic reticulum subcompartment	0.313433	0.0194444	1.68953e-11	67	21	1080	GO:0098827	GO:CC	27262	3278
10	cytoplasm	0.865672	0.00499139	2.50328e-11	67	58	11620	GO:0005737	GO:CC	27262	309
10	nuclear outer membrane-endoplasmic reticulum membrane network	0.313433	0.0190217	2.58629e-11	67	21	1104	GO:0042175	GO:CC	27262	1782
10	membrane	0.80597	0.00523763	2.25139e-10	67	54	10310	GO:0016020	GO:CC	27262	722
10	smooth endoplasmic reticulum	0.104478	0.189189	9.47334e-10	67	7	37	GO:0005790	GO:CC	27262	355
10	cytoplasmic vesicle	0.358209	0.0115108	1.35055e-08	67	24	2085	GO:0031410	GO:CC	27262	1109
10	intracellular vesicle	0.358209	0.0114943	1.39143e-08	67	24	2088	GO:0097708	GO:CC	27262	3146
10	vesicle	0.358209	0.0107191	5.8651e-08	67	24	2239	GO:0031982	GO:CC	27262	1231
10	mitochondrial respirasome	0.104478	0.0777778	6.20688e-07	67	7	90	GO:0005746	GO:CC	27262	317
10	respiratory chain complex	0.104478	0.0777778	6.20688e-07	67	7	90	GO:0098803	GO:CC	27262	3273
10	mitochondrial respiratory chain complex I	0.0895522	0.12	6.36163e-07	67	6	50	GO:0005747	GO:CC	27262	318
10	respiratory chain complex I	0.0895522	0.12	6.36163e-07	67	6	50	GO:0045271	GO:CC	27262	2178
10	NADH dehydrogenase complex	0.0895522	0.12	6.36163e-07	67	6	50	GO:0030964	GO:CC	27262	1017
10	membrane protein complex	0.253731	0.0140962	8.77943e-07	67	17	1206	GO:0098796	GO:CC	27262	3267
10	respirasome	0.104478	0.0714286	1.13171e-06	67	7	98	GO:0070469	GO:CC	27262	2505
10	pigment granule	0.104478	0.0673077	1.71779e-06	67	7	104	GO:0048770	GO:CC	27262	2248
10	melanosome	0.104478	0.0673077	1.71779e-06	67	7	104	GO:0042470	GO:CC	27262	1789
10	bounding membrane of organelle	0.283582	0.0111306	4.11284e-06	67	19	1707	GO:0098588	GO:CC	27262	3225
10	oxidoreductase complex	0.104478	0.057377	5.23169e-06	67	7	122	GO:1990204	GO:CC	27262	3808
10	endoplasmic reticulum protein-containing complex	0.104478	0.0514706	1.10952e-05	67	7	136	GO:0140534	GO:CC	27262	3558
10	organelle envelope	0.238806	0.0123839	1.67589e-05	67	16	1292	GO:0031967	GO:CC	27262	1218
10	envelope	0.238806	0.0123839	1.67589e-05	67	16	1292	GO:0031975	GO:CC	27262	1225
10	transporter complex	0.149254	0.0239808	1.78611e-05	67	10	417	GO:1990351	GO:CC	27262	3868
10	inner mitochondrial membrane protein complex	0.104478	0.0466667	2.17637e-05	67	7	150	GO:0098800	GO:CC	27262	3271
10	mitochondrion	0.283582	0.0097386	3.42322e-05	67	19	1951	GO:0005739	GO:CC	27262	310
10	intracellular membrane-bounded organelle	0.835821	0.00385728	4.35313e-05	67	56	14518	GO:0043231	GO:CC	27262	1888
10	neuron projection	0.253731	0.0104103	7.23112e-05	67	17	1633	GO:0043005	GO:CC	27262	1851
10	endosome	0.19403	0.0137131	0.000111006	67	13	948	GO:0005768	GO:CC	27262	336
10	intracellular anatomical structure	0.910448	0.00348472	0.000112165	67	61	17505	GO:0005622	GO:CC	27262	237
10	membrane-bounded organelle	0.835821	0.00373508	0.000177847	67	56	14993	GO:0043227	GO:CC	27262	1884
10	endoplasmic reticulum lumen	0.0895522	0.046875	0.000186946	67	6	128	GO:0005788	GO:CC	27262	353
10	mitochondrial envelope	0.179104	0.0143369	0.000205159	67	12	837	GO:0005740	GO:CC	27262	311
10	somatodendritic compartment	0.19403	0.0116071	0.000710037	67	13	1120	GO:0036477	GO:CC	27262	1724
10	mitochondrial membrane	0.164179	0.0141388	0.00071051	67	11	778	GO:0031966	GO:CC	27262	1217
10	Golgi apparatus	0.223881	0.00979752	0.000879621	67	15	1531	GO:0005794	GO:CC	27262	358
10	dendrite	0.164179	0.0137328	0.000938702	67	11	801	GO:0030425	GO:CC	27262	936
10	dendritic tree	0.164179	0.0136986	0.000961289	67	11	803	GO:0097447	GO:CC	27262	3014
10	vacuole	0.149254	0.015456	0.000965456	67	10	647	GO:0005773	GO:CC	27262	340
10	catalytic complex	0.238806	0.00895355	0.00124125	67	16	1787	GO:1902494	GO:CC	27262	3620
10	transmembrane transporter complex	0.119403	0.0204082	0.00131686	67	8	392	GO:1902495	GO:CC	27262	3621
10	organelle	0.850746	0.0035144	0.00132452	67	57	16219	GO:0043226	GO:CC	27262	1883
10	cellular anatomical entity	1	0.00293911	0.00152414	67	67	22796	GO:0110165	GO:CC	27262	3449
10	endoplasmic reticulum-Golgi intermediate compartment	0.0746269	0.046729	0.0016781	67	5	107	GO:0005793	GO:CC	27262	357
10	transport vesicle	0.119403	0.0192771	0.00199566	67	8	415	GO:0030133	GO:CC	27262	912
10	intracellular organelle	0.835821	0.00352401	0.00209918	67	56	15891	GO:0043229	GO:CC	27262	1886
10	mitochondrial protein-containing complex	0.104478	0.0231788	0.00233955	67	7	302	GO:0098798	GO:CC	27262	3269
10	vacuolar membrane	0.104478	0.0219436	0.00333439	67	7	319	GO:0005774	GO:CC	27262	341
10	dendritic spine	0.0895522	0.0266667	0.00482215	67	6	225	GO:0043197	GO:CC	27262	1872
10	neuron spine	0.0895522	0.025974	0.00559229	67	6	231	GO:0044309	GO:CC	27262	2068
10	coated vesicle	0.0895522	0.025	0.00693062	67	6	240	GO:0030135	GO:CC	27262	914
10	cell body	0.149254	0.0120192	0.00849247	67	10	832	GO:0044297	GO:CC	27262	2056
10	cell projection	0.268657	0.0068781	0.0105552	67	18	2617	GO:0042995	GO:CC	27262	1850
10	proton-transporting V-type ATPase complex	0.0447761	0.1	0.0136636	67	3	30	GO:0033176	GO:CC	27262	1396
10	lytic vacuole	0.119403	0.0145719	0.0146918	67	8	549	GO:0000323	GO:CC	27262	53
10	lysosome	0.119403	0.0145719	0.0146918	67	8	549	GO:0005764	GO:CC	27262	332
10	presynapse	0.134328	0.0120968	0.0206868	67	9	744	GO:0098793	GO:CC	27262	3265
10	neuronal cell body	0.134328	0.0120643	0.0211137	67	9	746	GO:0043025	GO:CC	27262	1853
10	plasma membrane bounded cell projection	0.253731	0.00675407	0.0229036	67	17	2517	GO:0120025	GO:CC	27262	3453
10	endosome membrane	0.104478	0.0156951	0.027781	67	7	446	GO:0010008	GO:CC	27262	667
10	organelle inner membrane	0.119403	0.013267	0.0281652	67	8	603	GO:0019866	GO:CC	27262	826
10	rough endoplasmic reticulum	0.0597015	0.0377358	0.0340974	67	4	106	GO:0005791	GO:CC	27262	356
10	axon	0.134328	0.0113208	0.0341493	67	9	795	GO:0030424	GO:CC	27262	935
10	presynaptic active zone	0.0597015	0.0363636	0.0393354	67	4	110	GO:0048786	GO:CC	27262	2249
10	plasma membrane region	0.179104	0.0084507	0.0395986	67	12	1420	GO:0098590	GO:CC	27262	3226
10	myelin sheath	0.0746269	0.0238095	0.0421491	67	5	210	GO:0043209	GO:CC	27262	1877
10	oxidoreduction-driven active transmembrane transporter activity	0.047619	0.0967742	0.0319206	63	3	31	GO:0015453	GO:MF	25177	2571
10	unfolded protein binding	0.0634921	0.0430108	0.0439765	63	4	93	GO:0051082	GO:MF	25177	8018
10	Arterial tortuosity	0.166667	0.173913	0.00499869	24	4	23	HP:0005116	HP	4965	3473
10	Wolff-Parkinson-White syndrome	0.166667	0.173913	0.00499869	24	4	23	HP:0001716	HP	4965	1255
10	Vascular tortuosity	0.166667	0.153846	0.0083579	24	4	26	HP:0004948	HP	4965	3387
10	Ventricular preexcitation	0.166667	0.142857	0.0113729	24	4	28	HP:0004309	HP	4965	3010
10	Scissor gait	0.125	0.333333	0.0116887	24	3	9	HP:0012407	HP	4965	8801
10	Polyneuropathy	0.208333	0.0806452	0.0130448	24	5	62	HP:0001271	HP	4965	968
10	Spastic paraparetic gait	0.125	0.3	0.0166451	24	3	10	HP:0031958	HP	4965	11992
10	Leber optic atrophy	0.125	0.3	0.0166451	24	3	10	HP:0001112	HP	4965	872
10	Psychosis	0.25	0.048	0.0299369	24	6	125	HP:0000709	HP	4965	552
10	Central retinal vessel vascular tortuosity	0.125	0.25	0.0303227	24	3	12	HP:0007768	HP	4965	4955
10	Retinal arterial tortuosity	0.125	0.25	0.0303227	24	3	12	HP:0000631	HP	4965	491
10	Action tremor	0.291667	0.0360825	0.0350414	24	7	194	HP:0002345	HP	4965	1722
10	Centrocecal scotoma	0.125	0.230769	0.0392944	24	3	13	HP:0000576	HP	4965	445
10	Oxidative phosphorylation	0.25	0.0676692	1.41409e-07	36	9	133	KEGG:00190	KEGG	8947	18
10	Parkinson disease	0.277778	0.0381679	3.96363e-06	36	10	262	KEGG:05012	KEGG	8947	405
10	Thermogenesis	0.25	0.0394737	1.56383e-05	36	9	228	KEGG:04714	KEGG	8947	343
10	Protein processing in endoplasmic reticulum	0.222222	0.0467836	2.26455e-05	36	8	171	KEGG:04141	KEGG	8947	273
10	Alzheimer disease	0.277778	0.0263158	0.000125158	36	10	380	KEGG:05010	KEGG	8947	404
10	Prion disease	0.222222	0.0300752	0.000630241	36	8	266	KEGG:05020	KEGG	8947	409
10	Pathways of neurodegeneration - multiple diseases	0.277778	0.021322	0.000823187	36	10	469	KEGG:05022	KEGG	8947	410
10	Diabetic cardiomyopathy	0.194444	0.0343137	0.00107503	36	7	204	KEGG:05415	KEGG	8947	485
10	Retrograde endocannabinoid signaling	0.166667	0.0410959	0.0017313	36	6	146	KEGG:04723	KEGG	8947	347
10	Chemical carcinogenesis - reactive oxygen species	0.194444	0.0318182	0.00175521	36	7	220	KEGG:05208	KEGG	8947	453
10	Amyotrophic lateral sclerosis	0.222222	0.0218579	0.0062742	36	8	366	KEGG:05014	KEGG	8947	406
10	Huntington disease	0.194444	0.0233333	0.0125445	36	7	300	KEGG:05016	KEGG	8947	407
10	Lysosome	0.138889	0.037037	0.0146862	36	5	135	KEGG:04142	KEGG	8947	274
10	Thyroid hormone synthesis	0.111111	0.0540541	0.0162408	36	4	74	KEGG:04918	KEGG	8947	368
10	Metabolic pathways	0.444444	0.00993789	0.0168461	36	16	1610	KEGG:01100	KEGG	8947	181
10	Antigen processing and presentation	0.111111	0.0481928	0.0252784	36	4	83	KEGG:04612	KEGG	8947	316
10	Non-alcoholic fatty liver disease	0.138889	0.0324675	0.0271017	36	5	154	KEGG:04932	KEGG	8947	382
10	Respiratory electron transport	0.179487	0.0777778	3.8216e-05	39	7	90	REAC:R-MMU-611105	REAC	8362	1288
10	Respiratory electron transport, ATP synthesis by chemiosmotic coupling, and heat production by uncoupling proteins.	0.179487	0.0619469	0.000182796	39	7	113	REAC:R-MMU-163200	REAC	8362	1289
10	Complex I biogenesis	0.128205	0.0961538	0.000932471	39	5	52	REAC:R-MMU-6799198	REAC	8362	307
10	Calnexin/calreticulin cycle	0.0769231	0.375	0.00128592	39	3	8	REAC:R-MMU-901042	REAC	8362	233
10	The citric acid (TCA) cycle and respiratory electron transport	0.179487	0.0440252	0.00180653	39	7	159	REAC:R-MMU-1428517	REAC	8362	1554
10	N-glycan trimming in the ER and Calnexin/Calreticulin cycle	0.0769231	0.1875	0.012531	39	3	16	REAC:R-MMU-532668	REAC	8362	875
10	Iron uptake and transport	0.102564	0.0727273	0.0288919	39	4	55	REAC:R-MMU-917937	REAC	8362	739
10	Factor: Egr-3; motif: NTGCGTGGGCGK	0.544118	0.00607953	0.00386478	68	37	6086	TF:M00245	TF	21866	850
10	Factor: E2F-1; motif: NNNSSCGCSAANN	0.676471	0.00508231	0.0119546	68	46	9051	TF:M07250	TF	21866	736
10	Factor: Egr-2; motif: GCGTGGGCGG	0.588235	0.00551268	0.0137592	68	40	7256	TF:M05494	TF	21866	840
10	Factor: E2F; motif: GGCGSG	0.735294	0.00478469	0.0154288	68	50	10450	TF:M00803	TF	21866	774
10	Factor: E2F-1; motif: NTTSGCGG	0.573529	0.00557382	0.0154606	68	39	6997	TF:M00430	TF	21866	734
10	Factor: Pax-5; motif: RRMSWGANWYCTNRAGCGKRACSRYNSM; match class: 1	0.485294	0.00596098	0.033899	68	33	5536	TF:M00144_1	TF	21866	2625
10	Oxidative phosphorylation	0.26087	0.111111	6.70341e-06	23	6	54	WP:WP1248	WP	4531	98
10	Electron transport chain	0.26087	0.0652174	0.000163561	23	6	92	WP:WP295	WP	4531	5
11	cytoplasmic translation	0.125	0.0382166	0.000561854	48	6	157	GO:0002181	GO:BP	27205	746
11	protein metabolic process	0.5	0.00432121	0.00792646	48	24	5554	GO:0019538	GO:BP	27205	6189
11	organonitrogen compound metabolic process	0.541667	0.00400678	0.00970106	48	26	6489	GO:1901564	GO:BP	27205	22563
11	regulation of protein metabolic process	0.3125	0.00586625	0.0342357	48	15	2557	GO:0051246	GO:BP	27205	14362
11	peptide metabolic process	0.1875	0.010181	0.0347155	48	9	884	GO:0006518	GO:BP	27205	2293
11	synapse	0.352941	0.0107335	1.28537e-07	51	18	1677	GO:0045202	GO:CC	27262	2147
11	postsynapse	0.254902	0.0150115	1.06737e-06	51	13	866	GO:0098794	GO:CC	27262	3266
11	cell junction	0.372549	0.00828248	2.72286e-06	51	19	2294	GO:0030054	GO:CC	27262	871
11	cytoplasm	0.803922	0.0035284	8.48212e-06	51	41	11620	GO:0005737	GO:CC	27262	309
11	cytosolic ribosome	0.117647	0.0521739	1.70092e-05	51	6	115	GO:0022626	GO:CC	27262	860
11	protein-containing complex	0.588235	0.00409724	0.000344626	51	30	7322	GO:0032991	GO:CC	27262	1343
11	ribosomal subunit	0.117647	0.0287081	0.000569735	51	6	209	GO:0044391	GO:CC	27262	2082
11	cell body	0.196078	0.0120192	0.0006096	51	10	832	GO:0044297	GO:CC	27262	2056
11	intracellular organelle	0.882353	0.00283179	0.000713888	51	45	15891	GO:0043229	GO:CC	27262	1886
11	intracellular anatomical structure	0.921569	0.00268495	0.000953025	51	47	17505	GO:0005622	GO:CC	27262	237
11	somatodendritic compartment	0.215686	0.00982143	0.0012567	51	11	1120	GO:0036477	GO:CC	27262	1724
11	cytosolic large ribosomal subunit	0.0784314	0.0615385	0.00150883	51	4	65	GO:0022625	GO:CC	27262	859
11	neuron projection	0.254902	0.00796081	0.00151922	51	13	1633	GO:0043005	GO:CC	27262	1851
11	organelle	0.882353	0.00277452	0.00151945	51	45	16219	GO:0043226	GO:CC	27262	1883
11	neuronal cell body	0.176471	0.0120643	0.00198985	51	9	746	GO:0043025	GO:CC	27262	1853
11	ribosome	0.137255	0.0166667	0.00282269	51	7	420	GO:0005840	GO:CC	27262	389
11	organelle membrane	0.352941	0.00545455	0.00350002	51	18	3300	GO:0031090	GO:CC	27262	1048
11	membrane-bounded organelle	0.823529	0.00280131	0.00834093	51	42	14993	GO:0043227	GO:CC	27262	1884
11	intracellular membrane-bounded organelle	0.803922	0.00282408	0.011426	51	41	14518	GO:0043231	GO:CC	27262	1888
11	cell projection	0.294118	0.00573175	0.0130208	51	15	2617	GO:0042995	GO:CC	27262	1850
11	large ribosomal subunit	0.0784314	0.03125	0.0217991	51	4	128	GO:0015934	GO:CC	27262	711
11	dendrite	0.156863	0.00998752	0.0249169	51	8	801	GO:0030425	GO:CC	27262	936
11	dendritic tree	0.156863	0.00996264	0.0253492	51	8	803	GO:0097447	GO:CC	27262	3014
11	postsynaptic density	0.117647	0.013986	0.032389	51	6	429	GO:0014069	GO:CC	27262	696
11	plasma membrane bounded cell projection	0.27451	0.00556218	0.0340497	51	14	2517	GO:0120025	GO:CC	27262	3453
11	asymmetric synapse	0.117647	0.0134228	0.0404617	51	6	447	GO:0032279	GO:CC	27262	1285
11	prespliceosome	0.0392157	0.166667	0.0499462	51	2	12	GO:0071010	GO:CC	27262	2610
11	U2-type prespliceosome	0.0392157	0.166667	0.0499462	51	2	12	GO:0071004	GO:CC	27262	2604
11	structural constituent of ribosome	0.12766	0.017094	0.019118	47	6	351	GO:0003735	GO:MF	25177	353
11	ionotropic glutamate receptor binding	0.0638298	0.0714286	0.0272563	47	3	42	GO:0035255	GO:MF	25177	5324
11	mRNA binding	0.12766	0.0154242	0.033732	47	6	389	GO:0003729	GO:MF	25177	351
11	Abnormal upper limb metaphysis morphology	0.1875	0.1875	0.0208254	16	3	16	HP:0009809	HP	4965	6309
11	Abnormal eating behavior	0.3125	0.0454545	0.0243379	16	5	110	HP:0100738	HP	4965	15720
11	Polyphagia	0.25	0.0645161	0.0498197	16	4	62	HP:0002591	HP	4965	1877
11	Ribosome	0.25	0.035503	0.000249626	24	6	169	KEGG:03010	KEGG	8947	208
11	Coronavirus disease - COVID-19	0.25	0.0247934	0.00194667	24	6	242	KEGG:05171	KEGG	8947	445
11	Thermogenesis	0.208333	0.0219298	0.0174052	24	5	228	KEGG:04714	KEGG	8947	343
11	Amyotrophic lateral sclerosis	0.25	0.0163934	0.0191363	24	6	366	KEGG:05014	KEGG	8947	406
11	Parkinson disease	0.208333	0.019084	0.0330052	24	5	262	KEGG:05012	KEGG	8947	405
11	SRP-dependent cotranslational protein targeting to membrane	0.214286	0.0681818	9.51493e-05	28	6	88	REAC:R-MMU-1799339	REAC	8362	1326
11	Nonsense Mediated Decay (NMD) independent of the Exon Junction Complex (EJC)	0.214286	0.0666667	0.00010882	28	6	90	REAC:R-MMU-975956	REAC	8362	935
11	Formation of a pool of free 40S subunits	0.214286	0.0618557	0.000169989	28	6	97	REAC:R-MMU-72689	REAC	8362	506
11	L13a-mediated translational silencing of Ceruloplasmin expression	0.214286	0.0560748	0.000303907	28	6	107	REAC:R-MMU-156827	REAC	8362	750
11	GTP hydrolysis and joining of the 60S ribosomal subunit	0.214286	0.0555556	0.000321053	28	6	108	REAC:R-MMU-72706	REAC	8362	563
11	Nonsense-Mediated Decay (NMD)	0.214286	0.0550459	0.000338984	28	6	109	REAC:R-MMU-927802	REAC	8362	936
11	Nonsense Mediated Decay (NMD) enhanced by the Exon Junction Complex (EJC)	0.214286	0.0550459	0.000338984	28	6	109	REAC:R-MMU-975957	REAC	8362	934
11	Cap-dependent Translation Initiation	0.214286	0.0521739	0.000464633	28	6	115	REAC:R-MMU-72737	REAC	8362	235
11	Eukaryotic Translation Initiation	0.214286	0.0521739	0.000464633	28	6	115	REAC:R-MMU-72613	REAC	8362	452
11	rRNA processing in the nucleus and cytosol	0.214286	0.0359281	0.00403594	28	6	167	REAC:R-MMU-8868773	REAC	8362	1714
11	Major pathway of rRNA processing in the nucleolus and cytosol	0.214286	0.0359281	0.00403594	28	6	167	REAC:R-MMU-6791226	REAC	8362	797
11	rRNA processing	0.214286	0.0359281	0.00403594	28	6	167	REAC:R-MMU-72312	REAC	8362	1713
11	Metabolism of RNA	0.321429	0.0170778	0.00912095	28	9	527	REAC:R-MMU-8953854	REAC	8362	802
11	Translation	0.214286	0.0277778	0.0172514	28	6	216	REAC:R-MMU-72766	REAC	8362	1600
11	Factor: ZF5; motif: GYCGCGCARNGCNN	0.788462	0.0043022	0.000223601	52	41	9530	TF:M02933	TF	21866	3838
11	Factor: ZF5; motif: GSGCGCGR; match class: 1	0.865385	0.00372055	0.00155154	52	45	12095	TF:M00716_1	TF	21866	3825
11	Factor: MOVO-B; motif: GNGGGGG; match class: 1	0.423077	0.00670323	0.00198688	52	22	3282	TF:M01104_1	TF	21866	2111
11	Factor: ZF5; motif: NRNGNGCGCGCWN; match class: 1	0.826923	0.00383073	0.00250365	52	43	11225	TF:M00333_1	TF	21866	3827
11	Factor: CPBP; motif: NGGGCGG	0.634615	0.00454045	0.00790651	52	33	7268	TF:M05301	TF	21866	540
11	Factor: SP6; motif: WGGGCGG	0.634615	0.00454045	0.00790651	52	33	7268	TF:M05455	TF	21866	3264
11	Factor: Sp3; motif: AGGGCGG	0.634615	0.00454045	0.00790651	52	33	7268	TF:M05665	TF	21866	3244
11	Factor: LKLF; motif: NGGGCGG	0.634615	0.00454045	0.00790651	52	33	7268	TF:M05391	TF	21866	1916
11	Factor: Kaiso; motif: SARNYCTCGCGAGAN; match class: 1	0.75	0.00390312	0.0167436	52	39	9992	TF:M10276_1	TF	21866	3791
11	Factor: E2F; motif: GGCGSG	0.769231	0.00382775	0.0170289	52	40	10450	TF:M00803	TF	21866	774
11	Factor: CPBP; motif: NGGGCGG; match class: 1	0.326923	0.007173	0.0200641	52	17	2370	TF:M05301_1	TF	21866	541
11	Factor: LKLF; motif: NGGGCGG; match class: 1	0.326923	0.007173	0.0200641	52	17	2370	TF:M05391_1	TF	21866	1917
11	Factor: SP6; motif: WGGGCGG; match class: 1	0.326923	0.007173	0.0200641	52	17	2370	TF:M05455_1	TF	21866	3265
11	Factor: Sp3; motif: AGGGCGG; match class: 1	0.326923	0.007173	0.0200641	52	17	2370	TF:M05665_1	TF	21866	3245
11	Factor: MOVO-B; motif: GNGGGGG	0.634615	0.00430585	0.027928	52	33	7664	TF:M01104	TF	21866	2110
11	Factor: AP-2; motif: MKCCCSCNGGCG	0.653846	0.00421105	0.029221	52	34	8074	TF:M00189	TF	21866	118
11	Factor: E2F; motif: TTTSGCGSG	0.519231	0.00492791	0.0292387	52	27	5479	TF:M00939	TF	21866	780
11	Factor: Egr-1; motif: WTGCGTGGGCGK; match class: 1	0.192308	0.0116144	0.0305499	52	10	861	TF:M00243_1	TF	21866	819
11	Factor: E2F-1; motif: NTTSGCGG	0.596154	0.00443047	0.0379732	52	31	6997	TF:M00430	TF	21866	734
11	Factor: E2F; motif: NCSCGCSAAAN	0.5	0.00498275	0.0386895	52	26	5218	TF:M00919	TF	21866	778
11	Cytoplasmic ribosomal proteins	0.238095	0.0649351	0.000741225	21	5	77	WP:WP163	WP	4531	110
12	endocytic vesicle lumen	0.5	0.5	0.033195	2	1	2	GO:0071682	GO:CC	27262	2758

## Sheet: aggregated_signature
gene	description	Score	FDR_of_ambient_RNA_removal		gene	description	Score	FDR_of_ambient_RNA_removal		gene	description	Score	FDR_of_ambient_RNA_removal
B4galnt2	beta-1,4-N-acetyl-galactosaminyl transferase 2 [Source:MGI Symbol;Acc:MGI:1342058]	1.11153e-11	0.001		B4galnt2	beta-1,4-N-acetyl-galactosaminyl transferase 2 [Source:MGI Symbol;Acc:MGI:1342058]	4.68936e-12	0.01		1700034P13Rik	RIKEN cDNA 1700034P13 gene [Source:MGI Symbol;Acc:MGI:1920581]	4.68936e-12	not_corrected
A830035A12Rik	RIKEN cDNA A830035A12 gene [Source:MGI Symbol;Acc:MGI:3045382]	1.19096e-09	0.001		Gfap	glial fibrillary acidic protein [Source:MGI Symbol;Acc:MGI:95697]	1.7366e-10	0.01		B4galnt2	beta-1,4-N-acetyl-galactosaminyl transferase 2 [Source:MGI Symbol;Acc:MGI:1342058]	1.11153e-11	not_corrected
B130024G19Rik	RIKEN cDNA B130024G19 gene [Source:MGI Symbol;Acc:MGI:3604353]	2.30205e-08	0.001		Eda	ectodysplasin-A [Source:MGI Symbol;Acc:MGI:1195272]	3.15297e-10	0.01		Eda	ectodysplasin-A [Source:MGI Symbol;Acc:MGI:1195272]	1.88584e-10	not_corrected
Gfap	glial fibrillary acidic protein [Source:MGI Symbol;Acc:MGI:95697]	1.05889e-07	0.001		A830035A12Rik	RIKEN cDNA A830035A12 gene [Source:MGI Symbol;Acc:MGI:3045382]	1.17661e-08	0.01		A830035A12Rik	RIKEN cDNA A830035A12 gene [Source:MGI Symbol;Acc:MGI:3045382]	4.7063e-08	not_corrected
Fbxl7	F-box and leucine-rich repeat protein 7 [Source:MGI Symbol;Acc:MGI:3052506]	3.26129e-07	0.001		Tafa1	TAFA chemokine like family member 1 [Source:MGI Symbol;Acc:MGI:2443695]	2.94118e-07	0.01		Gfap	glial fibrillary acidic protein [Source:MGI Symbol;Acc:MGI:95697]	1.34636e-07	not_corrected
Meis2	Meis homeobox 2 [Source:MGI Symbol;Acc:MGI:108564]	3.67515e-07	0.001		Pdzph1	PDZ and pleckstrin homology domains 1 [Source:MGI Symbol;Acc:MGI:1916489]	4.75867e-07	0.01		Col25a1	collagen, type XXV, alpha 1 [Source:MGI Symbol;Acc:MGI:1924268]	5.76437e-07	not_corrected
Npc1	NPC intracellular cholesterol transporter 1 [Source:MGI Symbol;Acc:MGI:1097712]	5.17702e-07	0.001		Alpk1	alpha-kinase 1 [Source:MGI Symbol;Acc:MGI:1918731]	4.80096e-07	0.01		Id3	inhibitor of DNA binding 3 [Source:MGI Symbol;Acc:MGI:96398]	6.68719e-07	not_corrected
Proca1	protein interacting with cyclin A1 [Source:MGI Symbol;Acc:MGI:1918274]	5.75765e-07	0.001		Meis2	Meis homeobox 2 [Source:MGI Symbol;Acc:MGI:108564]	5.48443e-07	0.01		Meis2	Meis homeobox 2 [Source:MGI Symbol;Acc:MGI:108564]	7.11943e-07	not_corrected
Agbl1	ATP/GTP binding protein-like 1 [Source:MGI Symbol;Acc:MGI:3646469]	1.98777e-06	0.001		Osbpl11	oxysterol binding protein-like 11 [Source:MGI Symbol;Acc:MGI:2146553]	7.36496e-07	0.01		Mpped2	metallophosphoesterase domain containing 2 [Source:MGI Symbol;Acc:MGI:1924265]	7.57709e-07	not_corrected
F630040K05Rik	RIKEN cDNA F630040K05 gene [Source:MGI Symbol;Acc:MGI:4437734]	5.69127e-06	0.001		Nkx2-2os	NK2 homeobox 2, opposite strand [Source:MGI Symbol;Acc:MGI:3652259]	8.96768e-07	0.01		Slc44a1	solute carrier family 44, member 1 [Source:MGI Symbol;Acc:MGI:2140592]	9.35688e-07	not_corrected
Otx2os1	orthodenticle homeobox 2 opposite strand 1 [Source:MGI Symbol;Acc:MGI:3583292]	6.77268e-06	0.001		Dnmt3b	DNA methyltransferase 3B [Source:MGI Symbol;Acc:MGI:1261819]	9.5283e-07	0.01		Colec12	collectin sub-family member 12 [Source:MGI Symbol;Acc:MGI:2152907]	9.61114e-07	not_corrected
Tafa1	TAFA chemokine like family member 1 [Source:MGI Symbol;Acc:MGI:2443695]	9.88712e-06	0.001		Rhoj	ras homolog family member J [Source:MGI Symbol;Acc:MGI:1931551]	1.26646e-06	0.01		Kcnk2	potassium channel, subfamily K, member 2 [Source:MGI Symbol;Acc:MGI:109366]	9.94167e-07	not_corrected
Dnmt3b	DNA methyltransferase 3B [Source:MGI Symbol;Acc:MGI:1261819]	1.12972e-05	0.001		Ogdhl	oxoglutarate dehydrogenase-like [Source:MGI Symbol;Acc:MGI:3616088]	1.69377e-06	0.01		Tafa1	TAFA chemokine like family member 1 [Source:MGI Symbol;Acc:MGI:2443695]	1.1763e-06	not_corrected
Cyp2j8	cytochrome P450, family 2, subfamily j, polypeptide 8 [Source:MGI Symbol;Acc:MGI:2449817]	1.20375e-05	0.001		Col25a1	collagen, type XXV, alpha 1 [Source:MGI Symbol;Acc:MGI:1924268]	2.30527e-06	0.01		Otx2os1	orthodenticle homeobox 2 opposite strand 1 [Source:MGI Symbol;Acc:MGI:3583292]	2.30527e-06	not_corrected
Trpt1	tRNA phosphotransferase 1 [Source:MGI Symbol;Acc:MGI:1333115]	1.4399e-05	0.001		B130024G19Rik	RIKEN cDNA B130024G19 gene [Source:MGI Symbol;Acc:MGI:3604353]	3.3988e-06	0.01		B130024G19Rik	RIKEN cDNA B130024G19 gene [Source:MGI Symbol;Acc:MGI:3604353]	3.01079e-06	not_corrected
Gadd45g	growth arrest and DNA-damage-inducible 45 gamma [Source:MGI Symbol;Acc:MGI:1346325]	5.11549e-05	0.001		F630040K05Rik	RIKEN cDNA F630040K05 gene [Source:MGI Symbol;Acc:MGI:4437734]	1.35884e-05	0.01		Ogdhl	oxoglutarate dehydrogenase-like [Source:MGI Symbol;Acc:MGI:3616088]	7.94802e-06	not_corrected
Alpk1	alpha-kinase 1 [Source:MGI Symbol;Acc:MGI:1918731]	5.42989e-05	0.001		Cyp2j8	cytochrome P450, family 2, subfamily j, polypeptide 8 [Source:MGI Symbol;Acc:MGI:2449817]	1.78762e-05	0.01		Ptchd4	patched domain containing 4 [Source:MGI Symbol;Acc:MGI:1920485]	2.17286e-05	not_corrected
Ptchd4	patched domain containing 4 [Source:MGI Symbol;Acc:MGI:1920485]	5.42989e-05	0.001		Ptchd4	patched domain containing 4 [Source:MGI Symbol;Acc:MGI:1920485]	3.17677e-05	0.01		Fbxl7	F-box and leucine-rich repeat protein 7 [Source:MGI Symbol;Acc:MGI:3052506]	3.96911e-05	not_corrected
Tmem241	transmembrane protein 241 [Source:MGI Symbol;Acc:MGI:2442435]	5.5906e-05	0.001		Agbl1	ATP/GTP binding protein-like 1 [Source:MGI Symbol;Acc:MGI:3646469]	3.81649e-05	0.01		Htra3	HtrA serine peptidase 3 [Source:MGI Symbol;Acc:MGI:1925808]	4.37988e-05	not_corrected
Fibp	fibroblast growth factor (acidic) intracellular binding protein [Source:MGI Symbol;Acc:MGI:1926233]	6.42924e-05	0.001		Colec12	collectin sub-family member 12 [Source:MGI Symbol;Acc:MGI:2152907]	4.96179e-05	0.01		Fam13a	family with sequence similarity 13, member A [Source:MGI Symbol;Acc:MGI:1889842]	4.70026e-05	not_corrected
Lama5	laminin, alpha 5 [Source:MGI Symbol;Acc:MGI:105382]	7.41662e-05	0.001		Tmem100	transmembrane protein 100 [Source:MGI Symbol;Acc:MGI:1915138]	5.75366e-05	0.01		Gfod2	glucose-fructose oxidoreductase domain containing 2 [Source:MGI Symbol;Acc:MGI:1917825]	6.58681e-05	not_corrected
Ctnna3	catenin (cadherin associated protein), alpha 3 [Source:MGI Symbol;Acc:MGI:2661445]	7.55615e-05	0.001		Slc25a34	solute carrier family 25, member 34 [Source:MGI Symbol;Acc:MGI:2686215]	6.25684e-05	0.01		Grtp1	GH regulated TBC protein 1 [Source:MGI Symbol;Acc:MGI:1914040]	6.71466e-05	not_corrected
Lipe	lipase, hormone sensitive [Source:MGI Symbol;Acc:MGI:96790]	0.000139087	0.001		B230312C02Rik	RIKEN cDNA B230312C02 gene [Source:MGI Symbol;Acc:MGI:2444130]	6.60399e-05	0.01		A830019P07Rik	RIKEN cDNA A830019P07 gene [Source:MGI Symbol;Acc:MGI:3028035]	7.37148e-05	not_corrected
Slc25a34	solute carrier family 25, member 34 [Source:MGI Symbol;Acc:MGI:2686215]	0.000150436	0.001		Fbxl7	F-box and leucine-rich repeat protein 7 [Source:MGI Symbol;Acc:MGI:3052506]	7.79415e-05	0.01		Agbl1	ATP/GTP binding protein-like 1 [Source:MGI Symbol;Acc:MGI:3646469]	7.77961e-05	not_corrected
Svil	supervillin [Source:MGI Symbol;Acc:MGI:2147319]	0.000189142	0.001		Ctnna3	catenin (cadherin associated protein), alpha 3 [Source:MGI Symbol;Acc:MGI:2661445]	8.97114e-05	0.01		Ctnna3	catenin (cadherin associated protein), alpha 3 [Source:MGI Symbol;Acc:MGI:2661445]	0.000114233	not_corrected
Pmepa1	prostate transmembrane protein, androgen induced 1 [Source:MGI Symbol;Acc:MGI:1929600]	0.000191296	0.001		Meg3	maternally expressed 3 [Source:MGI Symbol;Acc:MGI:1202886]	9.43178e-05	0.01		Ralyl	RALY RNA binding protein-like [Source:MGI Symbol;Acc:MGI:1924147]	0.000153545	not_corrected
Ripor2	RHO family interacting cell polarization regulator 2 [Source:MGI Symbol;Acc:MGI:2444879]	0.000208852	0.001		Rhcg	Rhesus blood group-associated C glycoprotein [Source:MGI Symbol;Acc:MGI:1888517]	9.90293e-05	0.01		Ntng1	netrin G1 [Source:MGI Symbol;Acc:MGI:1934028]	0.000175319	not_corrected
Alpl	alkaline phosphatase, liver/bone/kidney [Source:MGI Symbol;Acc:MGI:87983]	0.000223909	0.001		A830019P07Rik	RIKEN cDNA A830019P07 gene [Source:MGI Symbol;Acc:MGI:3028035]	0.000102229	0.01		Gstz1	glutathione transferase zeta 1 (maleylacetoacetate isomerase) [Source:MGI Symbol;Acc:MGI:1341859]	0.000194184	not_corrected
Spns1	spinster homolog 1 [Source:MGI Symbol;Acc:MGI:1920908]	0.000228502	0.001		Otx2os1	orthodenticle homeobox 2 opposite strand 1 [Source:MGI Symbol;Acc:MGI:3583292]	0.000105475	0.01		Tmem218	transmembrane protein 218 [Source:MGI Symbol;Acc:MGI:1913529]	0.000213993	not_corrected
Cage1	cancer antigen 1 [Source:MGI Symbol;Acc:MGI:1918463]	0.000231583	0.001		Lpxn	leupaxin [Source:MGI Symbol;Acc:MGI:2147677]	0.000113794	0.01		Mdfic	MyoD family inhibitor domain containing [Source:MGI Symbol;Acc:MGI:104611]	0.0002231	not_corrected
Gtf2f2	general transcription factor IIF, polypeptide 2 [Source:MGI Symbol;Acc:MGI:1915955]	0.000231583	0.001		Gfod2	glucose-fructose oxidoreductase domain containing 2 [Source:MGI Symbol;Acc:MGI:1917825]	0.000125932	0.01		Brip1os	BRCA1 interacting protein C-terminal helicase 1, opposite strand [Source:MGI Symbol;Acc:MGI:1921288]	0.000230053	not_corrected
Lcat	lecithin cholesterol acyltransferase [Source:MGI Symbol;Acc:MGI:96755]	0.000235445	0.001		Ripor2	RHO family interacting cell polarization regulator 2 [Source:MGI Symbol;Acc:MGI:2444879]	0.00014616	0.01		Adam2	a disintegrin and metallopeptidase domain 2 [Source:MGI Symbol;Acc:MGI:1340894]	0.000266383	not_corrected
Rhcg	Rhesus blood group-associated C glycoprotein [Source:MGI Symbol;Acc:MGI:1888517]	0.000247029	0.001		Foxb1	forkhead box B1 [Source:MGI Symbol;Acc:MGI:1927549]	0.00016575	0.01		Foxb1	forkhead box B1 [Source:MGI Symbol;Acc:MGI:1927549]	0.000271408	not_corrected
Tmem205	transmembrane protein 205 [Source:MGI Symbol;Acc:MGI:3045495]	0.000248574	0.001		A730056A06Rik	RIKEN cDNA A730056A06 gene [Source:MGI Symbol;Acc:MGI:2442718]	0.000183482	0.01		Pbx3	pre B cell leukemia homeobox 3 [Source:MGI Symbol;Acc:MGI:97496]	0.000273091	not_corrected
Tmem115	transmembrane protein 115 [Source:MGI Symbol;Acc:MGI:1930765]	0.000254752	0.001		Aqp9	aquaporin 9 [Source:MGI Symbol;Acc:MGI:1891066]	0.000200432	0.01		Rbfox1	RNA binding protein, fox-1 homolog (C. elegans) 1 [Source:MGI Symbol;Acc:MGI:1926224]	0.000286694	not_corrected
Hapln3	hyaluronan and proteoglycan link protein 3 [Source:MGI Symbol;Acc:MGI:1914916]	0.000259385	0.001		Abraxas1	BRCA1 A complex subunit [Source:MGI Symbol;Acc:MGI:1917931]	0.000225403	0.01		A230006K03Rik	RIKEN cDNA A230006K03 gene [Source:MGI Symbol;Acc:MGI:3644205]	0.000297059	not_corrected
Tmem222	transmembrane protein 222 [Source:MGI Symbol;Acc:MGI:1098568]	0.000265564	0.001		Adamts12	a disintegrin-like and metallopeptidase (reprolysin type) with thrombospondin type 1 motif, 12 [Source:MGI Symbol;Acc:MGI:2146046]	0.000232961	0.01		Pmepa1	prostate transmembrane protein, androgen induced 1 [Source:MGI Symbol;Acc:MGI:1929600]	0.000326688	not_corrected
Eya4	EYA transcriptional coactivator and phosphatase 4 [Source:MGI Symbol;Acc:MGI:1337104]	0.000272514	0.001		Id3	inhibitor of DNA binding 3 [Source:MGI Symbol;Acc:MGI:96398]	0.000247577	0.01		Slit2	slit guidance ligand 2 [Source:MGI Symbol;Acc:MGI:1315205]	0.000330174	not_corrected
Zbtb48	zinc finger and BTB domain containing 48 [Source:MGI Symbol;Acc:MGI:2140248]	0.000274831	0.001		Tmem115	transmembrane protein 115 [Source:MGI Symbol;Acc:MGI:1930765]	0.000249125	0.01		Diaph3	diaphanous related formin 3 [Source:MGI Symbol;Acc:MGI:1927222]	0.000334532	not_corrected
1600020E01Rik	RIKEN cDNA 1600020E01 gene [Source:MGI Symbol;Acc:MGI:1919262]	0.000277148	0.001		Il1rapl2	interleukin 1 receptor accessory protein-like 2 [Source:MGI Symbol;Acc:MGI:1913106]	0.000252996	0.01		Gdpd2	glycerophosphodiester phosphodiesterase domain containing 2 [Source:MGI Symbol;Acc:MGI:1918834]	0.000338018	not_corrected
4930544I03Rik	RIKEN cDNA 4930544I03 gene [Source:MGI Symbol;Acc:MGI:1925447]	0.000322712	0.001		Gdpd2	glycerophosphodiester phosphodiesterase domain containing 2 [Source:MGI Symbol;Acc:MGI:1918834]	0.000263062	0.01		Sncaip	synuclein, alpha interacting protein (synphilin) [Source:MGI Symbol;Acc:MGI:1915097]	0.000340632	not_corrected
1700034P13Rik	RIKEN cDNA 1700034P13 gene [Source:MGI Symbol;Acc:MGI:1920581]	0.000354261	0.001		Spag16	sperm associated antigen 16 [Source:MGI Symbol;Acc:MGI:1913972]	0.000267707	0.01		Ripor2	RHO family interacting cell polarization regulator 2 [Source:MGI Symbol;Acc:MGI:2444879]	0.000353705	not_corrected
Kcnip1	Kv channel-interacting protein 1 [Source:MGI Symbol;Acc:MGI:1917607]	0.000378316	0.001		Grm5	glutamate receptor, metabotropic 5 [Source:MGI Symbol;Acc:MGI:1351342]	0.000269256	0.01		Rbms1	RNA binding motif, single stranded interacting protein 1 [Source:MGI Symbol;Acc:MGI:1861774]	0.000354261	not_corrected
D030068K23Rik	RIKEN cDNA D030068K23 gene [Source:MGI Symbol;Acc:MGI:3037424]	0.000708498	0.001		Pantr1	POU domain, class 3, transcription factor 3 adjacent noncoding transcript 1 [Source:MGI Symbol;Acc:MGI:1913547]	0.000272353	0.01		F630040K05Rik	RIKEN cDNA F630040K05 gene [Source:MGI Symbol;Acc:MGI:4437734]	0.000358934	not_corrected
Acat3	acetyl-Coenzyme A acetyltransferase 3 [Source:MGI Symbol;Acc:MGI:109182]	0.00106271	0.001		Diaph3	diaphanous related formin 3 [Source:MGI Symbol;Acc:MGI:1927222]	0.000273127	0.01		Clic6	chloride intracellular channel 6 [Source:MGI Symbol;Acc:MGI:2146607]	0.000364163	not_corrected
Scel	sciellin [Source:MGI Symbol;Acc:MGI:1891228]	0.00106271	0.001		Srr	serine racemase [Source:MGI Symbol;Acc:MGI:1351636]	0.000278547	0.01		Tpk1	thiamine pyrophosphokinase [Source:MGI Symbol;Acc:MGI:1352500]	0.000368521	not_corrected
Padi2	peptidyl arginine deiminase, type II [Source:MGI Symbol;Acc:MGI:1338892]	0.00106271	0.001		Nedd9	neural precursor cell expressed, developmentally down-regulated gene 9 [Source:MGI Symbol;Acc:MGI:97302]	0.000281644	0.01		Med15	mediator complex subunit 15 [Source:MGI Symbol;Acc:MGI:2137379]	0.000374621	not_corrected
4930545L23Rik	RIKEN cDNA 4930545L23 gene [Source:MGI Symbol;Acc:MGI:1926055]	0.0014169	0.001		Pacsin3	protein kinase C and casein kinase substrate in neurons 3 [Source:MGI Symbol;Acc:MGI:1891410]	0.000283193	0.01		Hyou1	hypoxia up-regulated 1 [Source:MGI Symbol;Acc:MGI:108030]	0.000384208	not_corrected
Atxn7l2	ataxin 7-like 2 [Source:MGI Symbol;Acc:MGI:1919772]	0.0014169	0.001		Esrrg	estrogen-related receptor gamma [Source:MGI Symbol;Acc:MGI:1347056]	0.000285516	0.01		Zfp934	zinc finger protein 934 [Source:MGI Symbol;Acc:MGI:1924367]	0.00039118	not_corrected
Fgd1	FYVE, RhoGEF and PH domain containing 1 [Source:MGI Symbol;Acc:MGI:104566]	0.00177107	0.001		Bmp1	bone morphogenetic protein 1 [Source:MGI Symbol;Acc:MGI:88176]	0.000287838	0.01		Yipf3	Yip1 domain family, member 3 [Source:MGI Symbol;Acc:MGI:106280]	0.000394666	not_corrected
Vps18	VPS18 CORVET/HOPS core subunit [Source:MGI Symbol;Acc:MGI:2443626]	0.00177107	0.001		Crot	carnitine O-octanoyltransferase [Source:MGI Symbol;Acc:MGI:1921364]	0.000289387	0.01		Rdh5	retinol dehydrogenase 5 [Source:MGI Symbol;Acc:MGI:1201412]	0.000396409	not_corrected
B230312C02Rik	RIKEN cDNA B230312C02 gene [Source:MGI Symbol;Acc:MGI:2444130]	0.00177107	0.001		Hapln3	hyaluronan and proteoglycan link protein 3 [Source:MGI Symbol;Acc:MGI:1914916]	0.000290161	0.01		Spns1	spinster homolog 1 [Source:MGI Symbol;Acc:MGI:1920908]	0.000399895	not_corrected
Sgcd	sarcoglycan, delta (dystrophin-associated glycoprotein) [Source:MGI Symbol;Acc:MGI:1346525]	0.00177107	0.001		Smpdl3a	sphingomyelin phosphodiesterase, acid-like 3A [Source:MGI Symbol;Acc:MGI:1931437]	0.000294033	0.01		Spag16	sperm associated antigen 16 [Source:MGI Symbol;Acc:MGI:1913972]	0.000405124	not_corrected
A730081D07Rik	RIKEN cDNA A730081D07 gene [Source:MGI Symbol;Acc:MGI:2441825]	0.00212521	0.001		Ubash3b	ubiquitin associated and SH3 domain containing, B [Source:MGI Symbol;Acc:MGI:1920078]	0.000299452	0.01		Stau1	staufen double-stranded RNA binding protein 1 [Source:MGI Symbol;Acc:MGI:1338864]	0.000411225	not_corrected
Hey1	hairy/enhancer-of-split related with YRPW motif 1 [Source:MGI Symbol;Acc:MGI:1341800]	0.00212521	0.001		Tmem205	transmembrane protein 205 [Source:MGI Symbol;Acc:MGI:3045495]	0.000301001	0.01		Pou6f1	POU domain, class 6, transcription factor 1 [Source:MGI Symbol;Acc:MGI:102935]	0.000418197	not_corrected
Col9a2	collagen, type IX, alpha 2 [Source:MGI Symbol;Acc:MGI:88466]	0.00247933	0.001		Lmo4	LIM domain only 4 [Source:MGI Symbol;Acc:MGI:109360]	0.000303324	0.01		Dram2	DNA-damage regulated autophagy modulator 2 [Source:MGI Symbol;Acc:MGI:1914421]	0.000420811	not_corrected
Nmur2	neuromedin U receptor 2 [Source:MGI Symbol;Acc:MGI:2441765]	0.00247933	0.001		1810010H24Rik	RIKEN cDNA 1810010H24 gene [Source:MGI Symbol;Acc:MGI:1916316]	0.000307195	0.01		A830018L16Rik	RIKEN cDNA A830018L16 gene [Source:MGI Symbol;Acc:MGI:2444149]	0.000430398	not_corrected
Inhbb	inhibin beta-B [Source:MGI Symbol;Acc:MGI:96571]	0.00247933	0.001		Ranbp3l	RAN binding protein 3-like [Source:MGI Symbol;Acc:MGI:2444654]	0.000314938	0.01		Smg5	SMG5 nonsense mediated mRNA decay factor [Source:MGI Symbol;Acc:MGI:2447364]	0.000433884	not_corrected
Spag5	sperm associated antigen 5 [Source:MGI Symbol;Acc:MGI:1927470]	0.00247933	0.001		Dram2	DNA-damage regulated autophagy modulator 2 [Source:MGI Symbol;Acc:MGI:1914421]	0.000316486	0.01		Proca1	protein interacting with cyclin A1 [Source:MGI Symbol;Acc:MGI:1918274]	0.000435627	not_corrected
Col25a1	collagen, type XXV, alpha 1 [Source:MGI Symbol;Acc:MGI:1924268]	0.00283343	0.001		Pagr1a	PAXIP1 associated glutamate rich protein 1A [Source:MGI Symbol;Acc:MGI:1914528]	0.000322681	0.01		Il33	interleukin 33 [Source:MGI Symbol;Acc:MGI:1924375]	0.000445214	not_corrected
Trim30a	tripartite motif-containing 30A [Source:MGI Symbol;Acc:MGI:98178]	0.00283343	0.001		Gm42742	predicted gene 42742 [Source:MGI Symbol;Acc:MGI:5662879]	NA	0.01		Actr1b	ARP1 actin-related protein 1B, centractin beta [Source:MGI Symbol;Acc:MGI:1917446]	0.000446957	not_corrected
Ogdhl	oxoglutarate dehydrogenase-like [Source:MGI Symbol;Acc:MGI:3616088]	0.00283343	0.001		Ccdc60	coiled-coil domain containing 60 [Source:MGI Symbol;Acc:MGI:2141043]	0.000325003	0.01		Idh3b	isocitrate dehydrogenase 3 (NAD+) beta [Source:MGI Symbol;Acc:MGI:2158650]	0.0004487	not_corrected
Pdzph1	PDZ and pleckstrin homology domains 1 [Source:MGI Symbol;Acc:MGI:1916489]	0.00283343	0.001		Tpgs2	tubulin polyglutamylase complex subunit 2 [Source:MGI Symbol;Acc:MGI:1913898]	0.000337392	0.01		Rbm10	RNA binding motif protein 10 [Source:MGI Symbol;Acc:MGI:2384310]	0.000458286	not_corrected
Slc14a2	solute carrier family 14 (urea transporter), member 2 [Source:MGI Symbol;Acc:MGI:1351653]	0.0031875	0.001		Atr	ataxia telangiectasia and Rad3 related [Source:MGI Symbol;Acc:MGI:108028]	0.000341263	0.01		9530036O11Rik	RIKEN cDNA 9530036O11Rik [Source:MGI Symbol;Acc:MGI:2444607]	0.000459158	not_corrected
Lpcat1	lysophosphatidylcholine acyltransferase 1 [Source:MGI Symbol;Acc:MGI:2384812]	0.0031875	0.001		Capza1	capping actin protein of muscle Z-line subunit alpha 1 [Source:MGI Symbol;Acc:MGI:106227]	0.00034436	0.01		D6Wsu163e	DNA segment, Chr 6, Wayne State University 163, expressed [Source:MGI Symbol;Acc:MGI:107893]	0.000474845	not_corrected
Dcc	deleted in colorectal carcinoma [Source:MGI Symbol;Acc:MGI:94869]	0.00354155	0.001		Lhcgr	luteinizing hormone/choriogonadotropin receptor [Source:MGI Symbol;Acc:MGI:96783]	0.000354425	0.01		Egfl6	EGF-like-domain, multiple 6 [Source:MGI Symbol;Acc:MGI:1858599]	0.00050099	not_corrected
Msh5	mutS homolog 5 [Source:MGI Symbol;Acc:MGI:1329021]	0.00354155	0.001		Nxpe2	neurexophilin and PC-esterase domain family, member 2 [Source:MGI Symbol;Acc:MGI:1925502]	0.000370685	0.01		Egf	epidermal growth factor [Source:MGI Symbol;Acc:MGI:95290]	0.000503605	not_corrected
Tmem198b	transmembrane protein 198b [Source:MGI Symbol;Acc:MGI:1921077]	0.00354155	0.001		6530402F18Rik	RIKEN cDNA 6530402F18 gene [Source:MGI Symbol;Acc:MGI:1923470]	0.000396236	0.01		5031434O11Rik	RIKEN cDNA 5031434O11 gene [Source:MGI Symbol;Acc:MGI:1923230]	0.000520164	not_corrected
Syndig1	synapse differentiation inducing 1 [Source:MGI Symbol;Acc:MGI:3702158]	0.00389557	0.001		Ucp3	uncoupling protein 3 (mitochondrial, proton carrier) [Source:MGI Symbol;Acc:MGI:1099787]	0.000403979	0.01		Irx5	Iroquois homeobox 5 [Source:MGI Symbol;Acc:MGI:1859086]	0.000526264	not_corrected
Ankrd23	ankyrin repeat domain 23 [Source:MGI Symbol;Acc:MGI:1925571]	0.00389557	0.001		Efhd1	EF hand domain containing 1 [Source:MGI Symbol;Acc:MGI:1921607]	0.000432627	0.01		Chn1os3	chimerin 1, opposite strand 3 [Source:MGI Symbol;Acc:MGI:3705094]	0.000548052	not_corrected
Rab12	RAB12, member RAS oncogene family [Source:MGI Symbol;Acc:MGI:894284]	0.00389557	0.001		Ror1	receptor tyrosine kinase-like orphan receptor 1 [Source:MGI Symbol;Acc:MGI:1347520]	0.000440369	0.01		Mtg1	mitochondrial ribosome-associated GTPase 1 [Source:MGI Symbol;Acc:MGI:2685015]	0.000553281	not_corrected
Rspo3	R-spondin 3 [Source:MGI Symbol;Acc:MGI:1920030]	0.00424957	0.001		Rgs3	regulator of G-protein signaling 3 [Source:MGI Symbol;Acc:MGI:1354734]	0.000451983	0.01		Gal	galanin and GMAP prepropeptide [Source:MGI Symbol;Acc:MGI:95637]	0.00057594	not_corrected
Sctr	secretin receptor [Source:MGI Symbol;Acc:MGI:2441720]	0.00424957	0.001		Adra1a	adrenergic receptor, alpha 1a [Source:MGI Symbol;Acc:MGI:104773]	0.000485277	0.01		Nadsyn1	NAD synthetase 1 [Source:MGI Symbol;Acc:MGI:1926164]	0.000597728	not_corrected
Ddx42	DEAD box helicase 42 [Source:MGI Symbol;Acc:MGI:1919297]	0.00424957	0.001		2900052N01Rik	RIKEN cDNA 2900052N01 gene [Source:MGI Symbol;Acc:MGI:1920290]	0.000486051	0.01		Brinp2	bone morphogenic protein/retinoic acid inducible neural-specific 2 [Source:MGI Symbol;Acc:MGI:2443333]	0.000599471	not_corrected
A730056A06Rik	RIKEN cDNA A730056A06 gene [Source:MGI Symbol;Acc:MGI:2442718]	0.00460355	0.001		D130017N08Rik	RIKEN cDNA D130017N08 gene [Source:MGI Symbol;Acc:MGI:2443273]	0.000506182	0.01		Ror2	receptor tyrosine kinase-like orphan receptor 2 [Source:MGI Symbol;Acc:MGI:1347521]	0.0006047	not_corrected
1810010H24Rik	RIKEN cDNA 1810010H24 gene [Source:MGI Symbol;Acc:MGI:1916316]	0.00460355	0.001		Cdc42ep1	CDC42 effector protein (Rho GTPase binding) 1 [Source:MGI Symbol;Acc:MGI:1929763]	0.000515473	0.01		Nkx2-2os	NK2 homeobox 2, opposite strand [Source:MGI Symbol;Acc:MGI:3652259]	0.000626488	not_corrected
Sobp	sine oculis binding protein [Source:MGI Symbol;Acc:MGI:1924427]	0.00460355	0.001		Helq	helicase, POLQ-like [Source:MGI Symbol;Acc:MGI:2176740]	0.00051857	0.01		Alpk1	alpha-kinase 1 [Source:MGI Symbol;Acc:MGI:1918731]	0.000640432	not_corrected
Meg3	maternally expressed 3 [Source:MGI Symbol;Acc:MGI:1202886]	0.00495751	0.001		Lama5	laminin, alpha 5 [Source:MGI Symbol;Acc:MGI:105382]	0.000520893	0.01		Mbp	myelin basic protein [Source:MGI Symbol;Acc:MGI:96925]	0.000708498	not_corrected
Pcdhb17	protocadherin beta 17 [Source:MGI Symbol;Acc:MGI:2136754]	0.00495751	0.001		4930544I03Rik	RIKEN cDNA 4930544I03 gene [Source:MGI Symbol;Acc:MGI:1925447]	0.000708498	0.01		Inhbb	inhibin beta-B [Source:MGI Symbol;Acc:MGI:96571]	0.00106271	not_corrected
Npff	neuropeptide FF-amide peptide precursor [Source:MGI Symbol;Acc:MGI:1891708]	0.00495751	0.001		1700034P13Rik	RIKEN cDNA 1700034P13 gene [Source:MGI Symbol;Acc:MGI:1920581]	0.000708498	0.01		Hhip	Hedgehog-interacting protein [Source:MGI Symbol;Acc:MGI:1341847]	0.0014169	not_corrected
Gskip	GSK3B interacting protein [Source:MGI Symbol;Acc:MGI:1914037]	0.00495751	0.001		4930545L23Rik	RIKEN cDNA 4930545L23 gene [Source:MGI Symbol;Acc:MGI:1926055]	0.00106271	0.01		Scel	sciellin [Source:MGI Symbol;Acc:MGI:1891228]	0.00177107	not_corrected
Il1rapl2	interleukin 1 receptor accessory protein-like 2 [Source:MGI Symbol;Acc:MGI:1913106]	0.00531144	0.001		D030068K23Rik	RIKEN cDNA D030068K23 gene [Source:MGI Symbol;Acc:MGI:3037424]	0.0014169	0.01		Grm5	glutamate receptor, metabotropic 5 [Source:MGI Symbol;Acc:MGI:1351342]	0.00177107	not_corrected
Prcc	papillary renal cell carcinoma (translocation-associated) [Source:MGI Symbol;Acc:MGI:2137738]	0.00531144	0.001		Scel	sciellin [Source:MGI Symbol;Acc:MGI:1891228]	0.0014169	0.01		Mecom	MDS1 and EVI1 complex locus [Source:MGI Symbol;Acc:MGI:95457]	0.00212521	not_corrected
Cpne4	copine IV [Source:MGI Symbol;Acc:MGI:1921270]	0.00531144	0.001		Padi2	peptidyl arginine deiminase, type II [Source:MGI Symbol;Acc:MGI:1338892]	0.0014169	0.01		Padi2	peptidyl arginine deiminase, type II [Source:MGI Symbol;Acc:MGI:1338892]	0.00212521	not_corrected
Aldh1a1	aldehyde dehydrogenase family 1, subfamily A1 [Source:MGI Symbol;Acc:MGI:1353450]	0.00566535	0.001		Rspo3	R-spondin 3 [Source:MGI Symbol;Acc:MGI:1920030]	0.00177107	0.01		Slc14a2	solute carrier family 14 (urea transporter), member 2 [Source:MGI Symbol;Acc:MGI:1351653]	0.00247933	not_corrected
Dancr	differentiation antagonizing non-protein coding RNA [Source:MGI Symbol;Acc:MGI:1917286]	0.00566535	0.001		Slit2	slit guidance ligand 2 [Source:MGI Symbol;Acc:MGI:1315205]	0.00177107	0.01		Gab3	growth factor receptor bound protein 2-associated protein 3 [Source:MGI Symbol;Acc:MGI:2387324]	0.00283343	not_corrected
Fbxo46	F-box protein 46 [Source:MGI Symbol;Acc:MGI:2444918]	0.00566535	0.001		Sgcz	sarcoglycan zeta [Source:MGI Symbol;Acc:MGI:2388820]	0.00212521	0.01		Col9a2	collagen, type IX, alpha 2 [Source:MGI Symbol;Acc:MGI:88466]	0.00283343	not_corrected
Apoc1	apolipoprotein C-I [Source:MGI Symbol;Acc:MGI:88053]	0.00566535	0.001		Sgcd	sarcoglycan, delta (dystrophin-associated glycoprotein) [Source:MGI Symbol;Acc:MGI:1346525]	0.00212521	0.01		Kcnip4	Kv channel interacting protein 4 [Source:MGI Symbol;Acc:MGI:1933131]	0.00283343	not_corrected
Foxb1	forkhead box B1 [Source:MGI Symbol;Acc:MGI:1927549]	0.00601923	0.001		Sh2b2	SH2B adaptor protein 2 [Source:MGI Symbol;Acc:MGI:1345171]	0.00247933	0.01		Sgcd	sarcoglycan, delta (dystrophin-associated glycoprotein) [Source:MGI Symbol;Acc:MGI:1346525]	0.0031875	not_corrected
Obsl1	obscurin-like 1 [Source:MGI Symbol;Acc:MGI:2138628]	0.00601923	0.001		Shld2	shieldin complex subunit 2 [Source:MGI Symbol;Acc:MGI:1922948]	0.00247933	0.01		Gng2	guanine nucleotide binding protein (G protein), gamma 2 [Source:MGI Symbol;Acc:MGI:102705]	0.00354155	not_corrected
Shld2	shieldin complex subunit 2 [Source:MGI Symbol;Acc:MGI:1922948]	0.00601923	0.001		Tmem218	transmembrane protein 218 [Source:MGI Symbol;Acc:MGI:1913529]	0.00247933	0.01		4933433G19Rik	RIKEN cDNA 4933433G19 gene [Source:MGI Symbol;Acc:MGI:1918476]	0.00354155	not_corrected
Dgat1	diacylglycerol O-acyltransferase 1 [Source:MGI Symbol;Acc:MGI:1333825]	0.00601923	0.001		Msh5	mutS homolog 5 [Source:MGI Symbol;Acc:MGI:1329021]	0.00283343	0.01		Usp37	ubiquitin specific peptidase 37 [Source:MGI Symbol;Acc:MGI:2442483]	0.00354155	not_corrected
Cd109	CD109 antigen [Source:MGI Symbol;Acc:MGI:2445221]	0.00637309	0.001		Hey1	hairy/enhancer-of-split related with YRPW motif 1 [Source:MGI Symbol;Acc:MGI:1341800]	0.00283343	0.01		Syndig1	synapse differentiation inducing 1 [Source:MGI Symbol;Acc:MGI:3702158]	0.00389557	not_corrected
Hdac10	histone deacetylase 10 [Source:MGI Symbol;Acc:MGI:2158340]	0.00637309	0.001		Kcnrg	potassium channel regulator [Source:MGI Symbol;Acc:MGI:2685591]	0.0031875	0.01		Rtl4	retrotransposon Gag like 4 [Source:MGI Symbol;Acc:MGI:3588192]	0.00389557	not_corrected
Klc4	kinesin light chain 4 [Source:MGI Symbol;Acc:MGI:1922014]	0.00637309	0.001		Ano1	anoctamin 1, calcium activated chloride channel [Source:MGI Symbol;Acc:MGI:2142149]	0.0031875	0.01		Rbl2	RB transcriptional corepressor like 2 [Source:MGI Symbol;Acc:MGI:105085]	0.00389557	not_corrected
Nol4	nucleolar protein 4 [Source:MGI Symbol;Acc:MGI:2441684]	0.00637309	0.001		Spag5	sperm associated antigen 5 [Source:MGI Symbol;Acc:MGI:1927470]	0.0031875	0.01		Aldh1a1	aldehyde dehydrogenase family 1, subfamily A1 [Source:MGI Symbol;Acc:MGI:1353450]	0.00424957	not_corrected
Hes5	hes family bHLH transcription factor 5 [Source:MGI Symbol;Acc:MGI:104876]	0.00672693	0.001		Prtg	protogenin [Source:MGI Symbol;Acc:MGI:2444710]	0.00354155	0.01		Pcdh8	protocadherin 8 [Source:MGI Symbol;Acc:MGI:1306800]	0.00424957	not_corrected
Prickle1	prickle planar cell polarity protein 1 [Source:MGI Symbol;Acc:MGI:1916034]	0.00672693	0.001		Hdac3	histone deacetylase 3 [Source:MGI Symbol;Acc:MGI:1343091]	0.00354155	0.01		Msh5	mutS homolog 5 [Source:MGI Symbol;Acc:MGI:1329021]	0.00424957	not_corrected
Med12	mediator complex subunit 12 [Source:MGI Symbol;Acc:MGI:1926212]	0.00708074	0.001		Rtl4	retrotransposon Gag like 4 [Source:MGI Symbol;Acc:MGI:3588192]	0.00389557	0.01		Pard6g	par-6 family cell polarity regulator gamma [Source:MGI Symbol;Acc:MGI:2135606]	0.00424957	not_corrected
Ccdc146	coiled-coil domain containing 146 [Source:MGI Symbol;Acc:MGI:1922422]	0.00708074	0.001		Inhbb	inhibin beta-B [Source:MGI Symbol;Acc:MGI:96571]	0.00389557	0.01		Sgcz	sarcoglycan zeta [Source:MGI Symbol;Acc:MGI:2388820]	0.00460355	not_corrected
Fam104a	family with sequence similarity 104, member A [Source:MGI Symbol;Acc:MGI:106351]	0.00708074	0.001		Zfp219	zinc finger protein 219 [Source:MGI Symbol;Acc:MGI:1917140]	0.00389557	0.01		Kcnab2	potassium voltage-gated channel, shaker-related subfamily, beta member 2 [Source:MGI Symbol;Acc:MGI:109239]	0.00460355	not_corrected
A330032B11Rik	RIKEN cDNA A330032B11 gene [Source:MGI Symbol;Acc:MGI:2443002]	0.00743453	0.001		Cnot10	CCR4-NOT transcription complex, subunit 10 [Source:MGI Symbol;Acc:MGI:1926143]	0.00424957	0.01		Capn9	calpain 9 [Source:MGI Symbol;Acc:MGI:1920897]	0.00495751	not_corrected
4921511C10Rik	RIKEN cDNA 4921511C10 gene [Source:MGI Symbol;Acc:MGI:1918174]	0.00743453	0.001		Atxn7l2	ataxin 7-like 2 [Source:MGI Symbol;Acc:MGI:1919772]	0.00460355	0.01		Nrgn	neurogranin [Source:MGI Symbol;Acc:MGI:1927184]	0.00495751	not_corrected
Neat1	nuclear paraspeckle assembly transcript 1 (non-protein coding) [Source:MGI Symbol;Acc:MGI:1914211]	0.00743453	0.001		Phf1	PHD finger protein 1 [Source:MGI Symbol;Acc:MGI:98647]	0.00460355	0.01		Sntg1	syntrophin, gamma 1 [Source:MGI Symbol;Acc:MGI:1918346]	0.00531144	not_corrected
F5	coagulation factor V [Source:MGI Symbol;Acc:MGI:88382]	0.0077883	0.001		Col9a2	collagen, type IX, alpha 2 [Source:MGI Symbol;Acc:MGI:88466]	0.00495751	0.01		4930579K19Rik	RIKEN cDNA 4930579K19 gene [Source:MGI Symbol;Acc:MGI:1923131]	0.00531144	not_corrected
4933433G19Rik	RIKEN cDNA 4933433G19 gene [Source:MGI Symbol;Acc:MGI:1918476]	0.0077883	0.001		Npff	neuropeptide FF-amide peptide precursor [Source:MGI Symbol;Acc:MGI:1891708]	0.00495751	0.01		Prdm15	PR domain containing 15 [Source:MGI Symbol;Acc:MGI:1930121]	0.00531144	not_corrected
Ern1	endoplasmic reticulum (ER) to nucleus signalling 1 [Source:MGI Symbol;Acc:MGI:1930134]	0.0077883	0.001		Scap	SREBF chaperone [Source:MGI Symbol;Acc:MGI:2135958]	0.00495751	0.01		Shroom3	shroom family member 3 [Source:MGI Symbol;Acc:MGI:1351655]	0.00566535	not_corrected
4930549C15Rik	RIKEN cDNA 4930549C15 gene [Source:MGI Symbol;Acc:MGI:1922493]	0.00814204	0.001		Acat3	acetyl-Coenzyme A acetyltransferase 3 [Source:MGI Symbol;Acc:MGI:109182]	0.00531144	0.01		Mier2	MIER family member 2 [Source:MGI Symbol;Acc:MGI:1917677]	0.00566535	not_corrected
Pde8a	phosphodiesterase 8A [Source:MGI Symbol;Acc:MGI:1277116]	0.00814204	0.001		Cpne4	copine IV [Source:MGI Symbol;Acc:MGI:1921270]	0.00531144	0.01		Mgst1	microsomal glutathione S-transferase 1 [Source:MGI Symbol;Acc:MGI:1913850]	0.00566535	not_corrected
Zmat5	zinc finger, matrin type 5 [Source:MGI Symbol;Acc:MGI:1914428]	0.00814204	0.001		Ilf3	interleukin enhancer binding factor 3 [Source:MGI Symbol;Acc:MGI:1339973]	0.00531144	0.01		Cnmd	chondromodulin [Source:MGI Symbol;Acc:MGI:1341171]	0.00601923	not_corrected
Phf1	PHD finger protein 1 [Source:MGI Symbol;Acc:MGI:98647]	0.00849576	0.001		Zdhhc7	zinc finger, DHHC domain containing 7 [Source:MGI Symbol;Acc:MGI:2142662]	0.00566535	0.01		Cyp2j8	cytochrome P450, family 2, subfamily j, polypeptide 8 [Source:MGI Symbol;Acc:MGI:2449817]	0.00601923	not_corrected
Smurf2	SMAD specific E3 ubiquitin protein ligase 2 [Source:MGI Symbol;Acc:MGI:1913563]	0.00849576	0.001		Rbm20	RNA binding motif protein 20 [Source:MGI Symbol;Acc:MGI:1920963]	0.00566535	0.01		Nrg1	neuregulin 1 [Source:MGI Symbol;Acc:MGI:96083]	0.00601923	not_corrected
Id3	inhibitor of DNA binding 3 [Source:MGI Symbol;Acc:MGI:96398]	0.00884946	0.001		Fbxo46	F-box protein 46 [Source:MGI Symbol;Acc:MGI:2444918]	0.00566535	0.01		Nrg1	neuregulin 1 [Source:MGI Symbol;Acc:MGI:96083]	0.00601923	not_corrected
Nxpe2	neurexophilin and PC-esterase domain family, member 2 [Source:MGI Symbol;Acc:MGI:1925502]	0.00884946	0.001		Eml4	echinoderm microtubule associated protein like 4 [Source:MGI Symbol;Acc:MGI:1926048]	0.00566535	0.01		Nol4	nucleolar protein 4 [Source:MGI Symbol;Acc:MGI:2441684]	0.00601923	not_corrected
Rbm20	RNA binding motif protein 20 [Source:MGI Symbol;Acc:MGI:1920963]	0.00884946	0.001		Aldh1a1	aldehyde dehydrogenase family 1, subfamily A1 [Source:MGI Symbol;Acc:MGI:1353450]	0.00601923	0.01		Pomc	pro-opiomelanocortin-alpha [Source:MGI Symbol;Acc:MGI:97742]	0.00637309	not_corrected
Prtg	protogenin [Source:MGI Symbol;Acc:MGI:2444710]	0.00920313	0.001		Rabgef1	RAB guanine nucleotide exchange factor (GEF) 1 [Source:MGI Symbol;Acc:MGI:1929459]	0.00601923	0.01		Mcee	methylmalonyl CoA epimerase [Source:MGI Symbol;Acc:MGI:1920974]	0.00637309	not_corrected
Trmt10a	tRNA methyltransferase 10A [Source:MGI Symbol;Acc:MGI:1920421]	0.00920313	0.001		9330188P03Rik	RIKEN cDNA 9330188P03 gene [Source:MGI Symbol;Acc:MGI:2686435]	0.00637309	0.01		Ankrd23	ankyrin repeat domain 23 [Source:MGI Symbol;Acc:MGI:1925571]	0.00672693	not_corrected
Abraxas1	BRCA1 A complex subunit [Source:MGI Symbol;Acc:MGI:1917931]	0.00920313	0.001		Mgst1	microsomal glutathione S-transferase 1 [Source:MGI Symbol;Acc:MGI:1913850]	0.00637309	0.01		Trim39	tripartite motif-containing 39 [Source:MGI Symbol;Acc:MGI:1890659]	0.00672693	not_corrected
Ctdsp2	CTD (carboxy-terminal domain, RNA polymerase II, polypeptide A) small phosphatase 2 [Source:MGI Symbol;Acc:MGI:1098748]	0.00920313	0.001		Igfbp2	insulin-like growth factor binding protein 2 [Source:MGI Symbol;Acc:MGI:96437]	0.00672693	0.01		Rnf7	ring finger protein 7 [Source:MGI Symbol;Acc:MGI:1337096]	0.00672693	not_corrected
4933424G05Rik	RIKEN cDNA 4933424G05 gene [Source:MGI Symbol;Acc:MGI:1921706]	0.00955678	0.001		Brf2	BRF2, RNA polymerase III transcription initiation factor 50kDa subunit [Source:MGI Symbol;Acc:MGI:1913903]	0.00672693	0.01		Acat3	acetyl-Coenzyme A acetyltransferase 3 [Source:MGI Symbol;Acc:MGI:109182]	0.00708074	not_corrected
Asb5	ankyrin repeat and SOCs box-containing 5 [Source:MGI Symbol;Acc:MGI:1923544]	0.00955678	0.001		4921511C10Rik	RIKEN cDNA 4921511C10 gene [Source:MGI Symbol;Acc:MGI:1918174]	0.00672693	0.01		Fam163a	family with sequence similarity 163, member A [Source:MGI Symbol;Acc:MGI:3618859]	0.00708074	not_corrected
Inpp5e	inositol polyphosphate-5-phosphatase E [Source:MGI Symbol;Acc:MGI:1927753]	0.00955678	0.001		Smurf2	SMAD specific E3 ubiquitin protein ligase 2 [Source:MGI Symbol;Acc:MGI:1913563]	0.00672693	0.01		Ggta1	glycoprotein galactosyltransferase alpha 1, 3 [Source:MGI Symbol;Acc:MGI:95704]	0.00708074	not_corrected
Eml4	echinoderm microtubule associated protein like 4 [Source:MGI Symbol;Acc:MGI:1926048]	0.00955678	0.001		4930549C15Rik	RIKEN cDNA 4930549C15 gene [Source:MGI Symbol;Acc:MGI:1922493]	0.00708074	0.01		Commd7	COMM domain containing 7 [Source:MGI Symbol;Acc:MGI:1914197]	0.00708074	not_corrected
Egfl6	EGF-like-domain, multiple 6 [Source:MGI Symbol;Acc:MGI:1858599]	0.0099104	0.001		Nmur2	neuromedin U receptor 2 [Source:MGI Symbol;Acc:MGI:2441765]	0.00708074	0.01		Tigar	Trp53 induced glycolysis regulatory phosphatase [Source:MGI Symbol;Acc:MGI:2442752]	0.00743453	not_corrected
Rgs22	regulator of G-protein signalling 22 [Source:MGI Symbol;Acc:MGI:3613651]	0.0099104	0.001		4933433G19Rik	RIKEN cDNA 4933433G19 gene [Source:MGI Symbol;Acc:MGI:1918476]	0.00708074	0.01		Ryr2	ryanodine receptor 2, cardiac [Source:MGI Symbol;Acc:MGI:99685]	0.00743453	not_corrected
Mier2	MIER family member 2 [Source:MGI Symbol;Acc:MGI:1917677]	0.0099104	0.001		Fam83b	family with sequence similarity 83, member B [Source:MGI Symbol;Acc:MGI:2685362]	0.00743453	0.01		Sbno2	strawberry notch 2 [Source:MGI Symbol;Acc:MGI:2448490]	0.00743453	not_corrected
Isca2	iron-sulfur cluster assembly 2 [Source:MGI Symbol;Acc:MGI:1921566]	0.0099104	0.001		Nol4	nucleolar protein 4 [Source:MGI Symbol;Acc:MGI:2441684]	0.00743453	0.01		Homez	homeodomain leucine zipper-encoding gene [Source:MGI Symbol;Acc:MGI:2678023]	0.00743453	not_corrected
Sulf1	sulfatase 1 [Source:MGI Symbol;Acc:MGI:2138563]	0.010264	0.001		Ankrd23	ankyrin repeat domain 23 [Source:MGI Symbol;Acc:MGI:1925571]	0.0077883	0.01		Prtg	protogenin [Source:MGI Symbol;Acc:MGI:2444710]	0.0077883	not_corrected
Gfod2	glucose-fructose oxidoreductase domain containing 2 [Source:MGI Symbol;Acc:MGI:1917825]	0.010264	0.001		Muc1	mucin 1, transmembrane [Source:MGI Symbol;Acc:MGI:97231]	0.0077883	0.01		Cldn5	claudin 5 [Source:MGI Symbol;Acc:MGI:1276112]	0.0077883	not_corrected
Tmem121	transmembrane protein 121 [Source:MGI Symbol;Acc:MGI:1916445]	0.010264	0.001		Gpr19	G protein-coupled receptor 19 [Source:MGI Symbol;Acc:MGI:892973]	0.0077883	0.01		Kmt5c	lysine methyltransferase 5C [Source:MGI Symbol;Acc:MGI:2385262]	0.0077883	not_corrected
Ucp3	uncoupling protein 3 (mitochondrial, proton carrier) [Source:MGI Symbol;Acc:MGI:1099787]	0.0106176	0.001		Slc14a2	solute carrier family 14 (urea transporter), member 2 [Source:MGI Symbol;Acc:MGI:1351653]	0.00814204	0.01		Psmb5	proteasome (prosome, macropain) subunit, beta type 5 [Source:MGI Symbol;Acc:MGI:1194513]	0.0077883	not_corrected
9530036O11Rik	RIKEN cDNA 9530036O11Rik [Source:MGI Symbol;Acc:MGI:2444607]	0.0106176	0.001		Gab3	growth factor receptor bound protein 2-associated protein 3 [Source:MGI Symbol;Acc:MGI:2387324]	0.00814204	0.01		Cpne6	copine VI [Source:MGI Symbol;Acc:MGI:1334445]	0.00814204	not_corrected
B3galt6	UDP-Gal:betaGal beta 1,3-galactosyltransferase, polypeptide 6 [Source:MGI Symbol;Acc:MGI:2152819]	0.0106176	0.001		Alg3	asparagine-linked glycosylation 3 (alpha-1,3-mannosyltransferase) [Source:MGI Symbol;Acc:MGI:1098592]	0.00814204	0.01		Lrrk1	leucine-rich repeat kinase 1 [Source:MGI Symbol;Acc:MGI:2142227]	0.00814204	not_corrected
Tpgs1	tubulin polyglutamylase complex subunit 1 [Source:MGI Symbol;Acc:MGI:106618]	0.0106176	0.001		Camk1d	calcium/calmodulin-dependent protein kinase ID [Source:MGI Symbol;Acc:MGI:2442190]	0.00814204	0.01		Sema5b	sema domain, seven thrombospondin repeats (type 1 and type 1-like), transmembrane domain (TM) and short cytoplasmic domain, (semaphorin) 5B [Source:MGI Symbol;Acc:MGI:107555]	0.00814204	not_corrected
Slc6a20b	solute carrier family 6 (neurotransmitter transporter), member 20B [Source:MGI Symbol;Acc:MGI:1336891]	0.0109711	0.001		Trim30a	tripartite motif-containing 30A [Source:MGI Symbol;Acc:MGI:98178]	0.00849576	0.01		Kcnip1	Kv channel-interacting protein 1 [Source:MGI Symbol;Acc:MGI:1917607]	0.00849576	not_corrected
Hdac9	histone deacetylase 9 [Source:MGI Symbol;Acc:MGI:1931221]	0.0109711	0.001		Mier2	MIER family member 2 [Source:MGI Symbol;Acc:MGI:1917677]	0.00849576	0.01		Nxph1	neurexophilin 1 [Source:MGI Symbol;Acc:MGI:107492]	0.00884946	not_corrected
3110082J24Rik	RIKEN cDNA 3110082J24 gene [Source:MGI Symbol;Acc:MGI:3641994]	0.0113247	0.001		Apoc1	apolipoprotein C-I [Source:MGI Symbol;Acc:MGI:88053]	0.00849576	0.01		Vgf	VGF nerve growth factor inducible [Source:MGI Symbol;Acc:MGI:1343180]	0.00884946	not_corrected
Sdr42e1	short chain dehydrogenase/reductase family 42E, member 1 [Source:MGI Symbol;Acc:MGI:1921282]	0.0113247	0.001		E2f6	E2F transcription factor 6 [Source:MGI Symbol;Acc:MGI:1354159]	0.00884946	0.01		Tbc1d2	TBC1 domain family, member 2 [Source:MGI Symbol;Acc:MGI:2652885]	0.00920313	not_corrected
Sntb1	syntrophin, basic 1 [Source:MGI Symbol;Acc:MGI:101781]	0.0113247	0.001		5730522E02Rik	RIKEN cDNA 5730522E02 gene [Source:MGI Symbol;Acc:MGI:1917876]	0.00884946	0.01		Dcc	deleted in colorectal carcinoma [Source:MGI Symbol;Acc:MGI:94869]	0.00920313	not_corrected
3222401L13Rik	RIKEN cDNA 3222401L13 gene [Source:MGI Symbol;Acc:MGI:2444186]	0.0116782	0.001		Sesn2	sestrin 2 [Source:MGI Symbol;Acc:MGI:2651874]	0.00884946	0.01		Nmur2	neuromedin U receptor 2 [Source:MGI Symbol;Acc:MGI:2441765]	0.00955678	not_corrected
Fam83b	family with sequence similarity 83, member B [Source:MGI Symbol;Acc:MGI:2685362]	0.0116782	0.001		Isca2	iron-sulfur cluster assembly 2 [Source:MGI Symbol;Acc:MGI:1921566]	0.00884946	0.01		Svopl	SV2 related protein homolog (rat)-like [Source:MGI Symbol;Acc:MGI:2444335]	0.00955678	not_corrected
Dhx33	DEAH (Asp-Glu-Ala-His) box polypeptide 33 [Source:MGI Symbol;Acc:MGI:2445102]	0.0116782	0.001		Rgp1	RAB6A GEF compex partner 1 [Source:MGI Symbol;Acc:MGI:1915956]	0.00920313	0.01		Scn8a	sodium channel, voltage-gated, type VIII, alpha [Source:MGI Symbol;Acc:MGI:103169]	0.00955678	not_corrected
C030037D09Rik	RIKEN cDNA C030037D09 gene [Source:MGI Symbol;Acc:MGI:1924865]	0.0116782	0.001		Mppe1	metallophosphoesterase 1 [Source:MGI Symbol;Acc:MGI:2661311]	0.00920313	0.01		A730081D07Rik	RIKEN cDNA A730081D07 gene [Source:MGI Symbol;Acc:MGI:2441825]	0.0099104	not_corrected
Olfml1	olfactomedin-like 1 [Source:MGI Symbol;Acc:MGI:2679264]	0.0120317	0.001		Dnajb11	DnaJ heat shock protein family (Hsp40) member B11 [Source:MGI Symbol;Acc:MGI:1915088]	0.00920313	0.01		Mtfmt	mitochondrial methionyl-tRNA formyltransferase [Source:MGI Symbol;Acc:MGI:1916856]	0.0099104	not_corrected
Nemp2	nuclear envelope integral membrane protein 2 [Source:MGI Symbol;Acc:MGI:2444113]	0.0120317	0.001		Hhip	Hedgehog-interacting protein [Source:MGI Symbol;Acc:MGI:1341847]	0.00955678	0.01		Sctr	secretin receptor [Source:MGI Symbol;Acc:MGI:2441720]	0.010264	not_corrected
D130017N08Rik	RIKEN cDNA D130017N08 gene [Source:MGI Symbol;Acc:MGI:2443273]	0.0120317	0.001		Kctd4	potassium channel tetramerisation domain containing 4 [Source:MGI Symbol;Acc:MGI:1914766]	0.00955678	0.01		Phf1	PHD finger protein 1 [Source:MGI Symbol;Acc:MGI:98647]	0.010264	not_corrected
Mafg	v-maf musculoaponeurotic fibrosarcoma oncogene family, protein G (avian) [Source:MGI Symbol;Acc:MGI:96911]	0.0120317	0.001		Sbno2	strawberry notch 2 [Source:MGI Symbol;Acc:MGI:2448490]	0.00955678	0.01		Epha5	Eph receptor A5 [Source:MGI Symbol;Acc:MGI:99654]	0.010264	not_corrected
Adrb1	adrenergic receptor, beta 1 [Source:MGI Symbol;Acc:MGI:87937]	0.0123851	0.001		Senp2	SUMO/sentrin specific peptidase 2 [Source:MGI Symbol;Acc:MGI:1923076]	0.00955678	0.01		Sulf1	sulfatase 1 [Source:MGI Symbol;Acc:MGI:2138563]	0.0106176	not_corrected
Hpse2	heparanase 2 [Source:MGI Symbol;Acc:MGI:2685814]	0.0123851	0.001		Shroom3	shroom family member 3 [Source:MGI Symbol;Acc:MGI:1351655]	0.0099104	0.01		Tubb3	tubulin, beta 3 class III [Source:MGI Symbol;Acc:MGI:107813]	0.0106176	not_corrected
Wscd1	WSC domain containing 1 [Source:MGI Symbol;Acc:MGI:2448493]	0.0123851	0.001		Tbc1d7	TBC1 domain family, member 7 [Source:MGI Symbol;Acc:MGI:1914296]	0.0099104	0.01		Ankrd13d	ankyrin repeat domain 13 family, member D [Source:MGI Symbol;Acc:MGI:1915673]	0.0106176	not_corrected
Fam227b	family with sequence similarity 227, member B [Source:MGI Symbol;Acc:MGI:1923073]	0.0127386	0.001		Tpgs1	tubulin polyglutamylase complex subunit 1 [Source:MGI Symbol;Acc:MGI:106618]	0.0099104	0.01		Snap91	synaptosomal-associated protein 91 [Source:MGI Symbol;Acc:MGI:109132]	0.0109711	not_corrected
Ankrd13d	ankyrin repeat domain 13 family, member D [Source:MGI Symbol;Acc:MGI:1915673]	0.0127386	0.001		Zbtb40	zinc finger and BTB domain containing 40 [Source:MGI Symbol;Acc:MGI:2682254]	0.010264	0.01		4921511C10Rik	RIKEN cDNA 4921511C10 gene [Source:MGI Symbol;Acc:MGI:1918174]	0.0109711	not_corrected
Ap2b1	adaptor-related protein complex 2, beta 1 subunit [Source:MGI Symbol;Acc:MGI:1919020]	0.0127386	0.001		B3galt6	UDP-Gal:betaGal beta 1,3-galactosyltransferase, polypeptide 6 [Source:MGI Symbol;Acc:MGI:2152819]	0.010264	0.01		Tmeff1	transmembrane protein with EGF-like and two follistatin-like domains 1 [Source:MGI Symbol;Acc:MGI:1926810]	0.0109711	not_corrected
Ranbp3l	RAN binding protein 3-like [Source:MGI Symbol;Acc:MGI:2444654]	0.013092	0.001		Kcnk2	potassium channel, subfamily K, member 2 [Source:MGI Symbol;Acc:MGI:109366]	0.010264	0.01		B430010I23Rik	RIKEN cDNA B430010I23 gene [Source:MGI Symbol;Acc:MGI:1926099]	0.0113247	not_corrected
Nbeal2	neurobeachin-like 2 [Source:MGI Symbol;Acc:MGI:2448554]	0.013092	0.001		Ndc1	NDC1 transmembrane nucleoporin [Source:MGI Symbol;Acc:MGI:1920037]	0.0106176	0.01		A330032B11Rik	RIKEN cDNA A330032B11 gene [Source:MGI Symbol;Acc:MGI:2443002]	0.0113247	not_corrected
Mppe1	metallophosphoesterase 1 [Source:MGI Symbol;Acc:MGI:2661311]	0.013092	0.001		Prickle1	prickle planar cell polarity protein 1 [Source:MGI Symbol;Acc:MGI:1916034]	0.0106176	0.01		Malrd1	MAM and LDL receptor class A domain containing 1 [Source:MGI Symbol;Acc:MGI:1928271]	0.0113247	not_corrected
Nlk	nemo like kinase [Source:MGI Symbol;Acc:MGI:1201387]	0.013092	0.001		Zpr1	ZPR1 zinc finger [Source:MGI Symbol;Acc:MGI:1330262]	0.0106176	0.01		Neat1	nuclear paraspeckle assembly transcript 1 (non-protein coding) [Source:MGI Symbol;Acc:MGI:1914211]	0.0113247	not_corrected
Spag16	sperm associated antigen 16 [Source:MGI Symbol;Acc:MGI:1913972]	0.0134454	0.001		C030037D09Rik	RIKEN cDNA C030037D09 gene [Source:MGI Symbol;Acc:MGI:1924865]	0.0106176	0.01		Zfp691	zinc finger protein 691 [Source:MGI Symbol;Acc:MGI:3041163]	0.0116782	not_corrected
Cpsf1	cleavage and polyadenylation specific factor 1 [Source:MGI Symbol;Acc:MGI:2679722]	0.0134454	0.001		Zcwpw2	zinc finger, CW type with PWWP domain 2 [Source:MGI Symbol;Acc:MGI:1921888]	0.0109711	0.01		Fam227a	family with sequence similarity 227, member A [Source:MGI Symbol;Acc:MGI:1922979]	0.0116782	not_corrected
Slc35b1	solute carrier family 35, member B1 [Source:MGI Symbol;Acc:MGI:1343133]	0.0134454	0.001		4933407K13Rik	RIKEN cDNA 4933407K13 gene [Source:MGI Symbol;Acc:MGI:1921646]	0.0109711	0.01		Eif3c	eukaryotic translation initiation factor 3, subunit C [Source:MGI Symbol;Acc:MGI:1926966]	0.0116782	not_corrected
Nkx2-2os	NK2 homeobox 2, opposite strand [Source:MGI Symbol;Acc:MGI:3652259]	0.0137987	0.001		Kcnq3	potassium voltage-gated channel, subfamily Q, member 3 [Source:MGI Symbol;Acc:MGI:1336181]	0.0109711	0.01		Or52ac1	olfactory receptor family 52 subfamily AC member 1 [Source:MGI Symbol;Acc:MGI:3030489]	NA	not_corrected
Zfhx2os	zinc finger homeobox 2, opposite strand [Source:MGI Symbol;Acc:MGI:3620246]	0.0137987	0.001		Olfml1	olfactomedin-like 1 [Source:MGI Symbol;Acc:MGI:2679264]	0.0113247	0.01		Serpini1	serine (or cysteine) peptidase inhibitor, clade I, member 1 [Source:MGI Symbol;Acc:MGI:1194506]	0.0120317	not_corrected
Adgrd1	adhesion G protein-coupled receptor D1 [Source:MGI Symbol;Acc:MGI:3041203]	0.0137987	0.001		Tab2	TGF-beta activated kinase 1/MAP3K7 binding protein 2 [Source:MGI Symbol;Acc:MGI:1915902]	0.0113247	0.01		Txndc12	thioredoxin domain containing 12 (endoplasmic reticulum) [Source:MGI Symbol;Acc:MGI:1913323]	0.0120317	not_corrected
Fcho2	FCH domain only 2 [Source:MGI Symbol;Acc:MGI:3505790]	0.0137987	0.001		Sulf1	sulfatase 1 [Source:MGI Symbol;Acc:MGI:2138563]	0.0116782	0.01		Rasgrf2	RAS protein-specific guanine nucleotide-releasing factor 2 [Source:MGI Symbol;Acc:MGI:109137]	0.0123851	not_corrected
Lima1	LIM domain and actin binding 1 [Source:MGI Symbol;Acc:MGI:1920992]	0.0141521	0.001		Car10	carbonic anhydrase 10 [Source:MGI Symbol;Acc:MGI:1919855]	0.0116782	0.01		Slc36a1	solute carrier family 36 (proton/amino acid symporter), member 1 [Source:MGI Symbol;Acc:MGI:2445299]	0.0123851	not_corrected
Pcgf6	polycomb group ring finger 6 [Source:MGI Symbol;Acc:MGI:1918291]	0.0141521	0.001		Inpp5e	inositol polyphosphate-5-phosphatase E [Source:MGI Symbol;Acc:MGI:1927753]	0.0116782	0.01		Kcnq1ot1	KCNQ1 overlapping transcript 1 [Source:MGI Symbol;Acc:MGI:1926855]	0.0123851	not_corrected
BC005537	cDNA sequence BC005537 [Source:MGI Symbol;Acc:MGI:2441726]	0.0141521	0.001		Hspa2	heat shock protein 2 [Source:MGI Symbol;Acc:MGI:96243]	0.0116782	0.01		Lipe	lipase, hormone sensitive [Source:MGI Symbol;Acc:MGI:96790]	0.0127386	not_corrected
6530402F18Rik	RIKEN cDNA 6530402F18 gene [Source:MGI Symbol;Acc:MGI:1923470]	0.0145054	0.001		Syndig1	synapse differentiation inducing 1 [Source:MGI Symbol;Acc:MGI:3702158]	0.0120317	0.01		Tmem82	transmembrane protein 82 [Source:MGI Symbol;Acc:MGI:2384869]	0.0127386	not_corrected
Sh2b2	SH2B adaptor protein 2 [Source:MGI Symbol;Acc:MGI:1345171]	0.0145054	0.001		Brpf3	bromodomain and PHD finger containing, 3 [Source:MGI Symbol;Acc:MGI:2146836]	0.0120317	0.01		Npff	neuropeptide FF-amide peptide precursor [Source:MGI Symbol;Acc:MGI:1891708]	0.0127386	not_corrected
Cfap100	cilia and flagella associated protein 100 [Source:MGI Symbol;Acc:MGI:2141635]	0.0145054	0.001		Mafg	v-maf musculoaponeurotic fibrosarcoma oncogene family, protein G (avian) [Source:MGI Symbol;Acc:MGI:96911]	0.0120317	0.01		Kcnq3	potassium voltage-gated channel, subfamily Q, member 3 [Source:MGI Symbol;Acc:MGI:1336181]	0.0127386	not_corrected
Smoc1	SPARC related modular calcium binding 1 [Source:MGI Symbol;Acc:MGI:1929878]	0.0148587	0.001		Pde8a	phosphodiesterase 8A [Source:MGI Symbol;Acc:MGI:1277116]	0.0123851	0.01		Ppp1r3g	protein phosphatase 1, regulatory subunit 3G [Source:MGI Symbol;Acc:MGI:1923737]	0.013092	not_corrected
Ttc7	tetratricopeptide repeat domain 7 [Source:MGI Symbol;Acc:MGI:1920999]	0.0148587	0.001		Klc4	kinesin light chain 4 [Source:MGI Symbol;Acc:MGI:1922014]	0.0123851	0.01		Dapk2	death-associated protein kinase 2 [Source:MGI Symbol;Acc:MGI:1341297]	0.013092	not_corrected
Flt3l	FMS-like tyrosine kinase 3 ligand [Source:MGI Symbol;Acc:MGI:95560]	0.0148587	0.001		Cd9	CD9 antigen [Source:MGI Symbol;Acc:MGI:88348]	0.0123851	0.01		Spag5	sperm associated antigen 5 [Source:MGI Symbol;Acc:MGI:1927470]	0.013092	not_corrected
Snrpd3	small nuclear ribonucleoprotein D3 [Source:MGI Symbol;Acc:MGI:1914582]	0.0148587	0.001		Smoc1	SPARC related modular calcium binding 1 [Source:MGI Symbol;Acc:MGI:1929878]	0.0127386	0.01		Kcnab1	potassium voltage-gated channel, shaker-related subfamily, beta member 1 [Source:MGI Symbol;Acc:MGI:109155]	0.0134454	not_corrected
9530051G07Rik	RIKEN cDNA 9530051G07 gene [Source:MGI Symbol;Acc:MGI:2442715]	0.015212	0.001		Ppp1r3g	protein phosphatase 1, regulatory subunit 3G [Source:MGI Symbol;Acc:MGI:1923737]	0.0127386	0.01		Ifitm1	interferon induced transmembrane protein 1 [Source:MGI Symbol;Acc:MGI:1915963]	0.0134454	not_corrected
Sesn2	sestrin 2 [Source:MGI Symbol;Acc:MGI:2651874]	0.015212	0.001		Cpsf1	cleavage and polyadenylation specific factor 1 [Source:MGI Symbol;Acc:MGI:2679722]	0.0127386	0.01		Nat2	N-acetyltransferase 2 (arylamine N-acetyltransferase) [Source:MGI Symbol;Acc:MGI:109201]	0.0134454	not_corrected
Dok6	docking protein 6 [Source:MGI Symbol;Acc:MGI:3639495]	0.015212	0.001		Commd7	COMM domain containing 7 [Source:MGI Symbol;Acc:MGI:1914197]	0.0127386	0.01		Fam83b	family with sequence similarity 83, member B [Source:MGI Symbol;Acc:MGI:2685362]	0.0137987	not_corrected
Zfp976	zinc finger protein 976 [Source:MGI Symbol;Acc:MGI:3036263]	0.0155652	0.001		Pcdhb17	protocadherin beta 17 [Source:MGI Symbol;Acc:MGI:2136754]	0.013092	0.01		Naglu	alpha-N-acetylglucosaminidase (Sanfilippo disease IIIB) [Source:MGI Symbol;Acc:MGI:1351641]	0.0137987	not_corrected
Lrrc1	leucine rich repeat containing 1 [Source:MGI Symbol;Acc:MGI:2442313]	0.0155652	0.001		Ccdc146	coiled-coil domain containing 146 [Source:MGI Symbol;Acc:MGI:1922422]	0.013092	0.01		Gabrg3	gamma-aminobutyric acid (GABA) A receptor, subunit gamma 3 [Source:MGI Symbol;Acc:MGI:95624]	0.0137987	not_corrected
Ankra2	ankyrin repeat, family A (RFXANK-like), 2 [Source:MGI Symbol;Acc:MGI:1915808]	0.0155652	0.001		Wscd1	WSC domain containing 1 [Source:MGI Symbol;Acc:MGI:2448493]	0.013092	0.01		Unc13c	unc-13 homolog C [Source:MGI Symbol;Acc:MGI:2149021]	0.0141521	not_corrected
2810049E08Rik	RIKEN cDNA 2810049E08 gene [Source:MGI Symbol;Acc:MGI:1919927]	0.0159184	0.001		3222401L13Rik	RIKEN cDNA 3222401L13 gene [Source:MGI Symbol;Acc:MGI:2444186]	0.0134454	0.01		Dcps	decapping enzyme, scavenger [Source:MGI Symbol;Acc:MGI:1916555]	0.0141521	not_corrected
Sbno2	strawberry notch 2 [Source:MGI Symbol;Acc:MGI:2448490]	0.0159184	0.001		AI849053	expressed sequence AI849053 [Source:MGI Symbol;Acc:MGI:2139818]	0.0134454	0.01		Junb	jun B proto-oncogene [Source:MGI Symbol;Acc:MGI:96647]	0.0141521	not_corrected
Nova1	NOVA alternative splicing regulator 1 [Source:MGI Symbol;Acc:MGI:104297]	0.0159184	0.001		Lrrc1	leucine rich repeat containing 1 [Source:MGI Symbol;Acc:MGI:2442313]	0.0134454	0.01		A930005H10Rik	RIKEN cDNA A930005H10 gene [Source:MGI Symbol;Acc:MGI:1915411]	0.0145054	not_corrected
Rnf122	ring finger protein 122 [Source:MGI Symbol;Acc:MGI:1916117]	0.0162716	0.001		Man2a2	mannosidase 2, alpha 2 [Source:MGI Symbol;Acc:MGI:2150656]	0.0134454	0.01		Esrrg	estrogen-related receptor gamma [Source:MGI Symbol;Acc:MGI:1347056]	0.0145054	not_corrected
Trim39	tripartite motif-containing 39 [Source:MGI Symbol;Acc:MGI:1890659]	0.0162716	0.001		Ssna1	SS nuclear autoantigen 1 [Source:MGI Symbol;Acc:MGI:1915725]	0.0137987	0.01		Asb6	ankyrin repeat and SOCS box-containing 6 [Source:MGI Symbol;Acc:MGI:1919573]	0.0145054	not_corrected
Fam161a	family with sequence similarity 161, member A [Source:MGI Symbol;Acc:MGI:1921123]	0.0162716	0.001		Rnf122	ring finger protein 122 [Source:MGI Symbol;Acc:MGI:1916117]	0.0141521	0.01		Man2a2	mannosidase 2, alpha 2 [Source:MGI Symbol;Acc:MGI:2150656]	0.0145054	not_corrected
Mat2b	methionine adenosyltransferase II, beta [Source:MGI Symbol;Acc:MGI:1913667]	0.0162716	0.001		Trpt1	tRNA phosphotransferase 1 [Source:MGI Symbol;Acc:MGI:1333115]	0.0141521	0.01		Entpd7	ectonucleoside triphosphate diphosphohydrolase 7 [Source:MGI Symbol;Acc:MGI:2135885]	0.0148587	not_corrected
A830019P07Rik	RIKEN cDNA A830019P07 gene [Source:MGI Symbol;Acc:MGI:3028035]	0.0166248	0.001		Gga2	golgi associated, gamma adaptin ear containing, ARF binding protein 2 [Source:MGI Symbol;Acc:MGI:1921355]	0.0141521	0.01		Gpr137	G protein-coupled receptor 137 [Source:MGI Symbol;Acc:MGI:2147529]	0.0148587	not_corrected
Meis3	Meis homeobox 3 [Source:MGI Symbol;Acc:MGI:108519]	0.0166248	0.001		Mtor	mechanistic target of rapamycin kinase [Source:MGI Symbol;Acc:MGI:1928394]	0.0141521	0.01		Fgf12	fibroblast growth factor 12 [Source:MGI Symbol;Acc:MGI:109183]	0.0148587	not_corrected
Slitrk2	SLIT and NTRK-like family, member 2 [Source:MGI Symbol;Acc:MGI:2679449]	0.0166248	0.001		A330032B11Rik	RIKEN cDNA A330032B11 gene [Source:MGI Symbol;Acc:MGI:2443002]	0.0145054	0.01		Cdkl3	cyclin-dependent kinase-like 3 [Source:MGI Symbol;Acc:MGI:2388268]	0.015212	not_corrected
Colec12	collectin sub-family member 12 [Source:MGI Symbol;Acc:MGI:2152907]	0.016978	0.001		Tubd1	tubulin, delta 1 [Source:MGI Symbol;Acc:MGI:1891826]	0.0145054	0.01		Dnmt3b	DNA methyltransferase 3B [Source:MGI Symbol;Acc:MGI:1261819]	0.015212	not_corrected
Sntg1	syntrophin, gamma 1 [Source:MGI Symbol;Acc:MGI:1918346]	0.016978	0.001		Tmeff1	transmembrane protein with EGF-like and two follistatin-like domains 1 [Source:MGI Symbol;Acc:MGI:1926810]	0.0145054	0.01		Dok6	docking protein 6 [Source:MGI Symbol;Acc:MGI:3639495]	0.015212	not_corrected
Creb3l1	cAMP responsive element binding protein 3-like 1 [Source:MGI Symbol;Acc:MGI:1347062]	0.016978	0.001		4933424G05Rik	RIKEN cDNA 4933424G05 gene [Source:MGI Symbol;Acc:MGI:1921706]	0.0148587	0.01		Sh3d21	SH3 domain containing 21 [Source:MGI Symbol;Acc:MGI:1914188]	0.0155652	not_corrected
Grip1	glutamate receptor interacting protein 1 [Source:MGI Symbol;Acc:MGI:1921303]	0.016978	0.001		Hs6st3	heparan sulfate 6-O-sulfotransferase 3 [Source:MGI Symbol;Acc:MGI:1354960]	0.0148587	0.01		Rpgrip1	retinitis pigmentosa GTPase regulator interacting protein 1 [Source:MGI Symbol;Acc:MGI:1932134]	0.0155652	not_corrected
Mettl24	methyltransferase like 24 [Source:MGI Symbol;Acc:MGI:3045338]	0.0173311	0.001		Atg16l2	autophagy related 16-like 2 (S. cerevisiae) [Source:MGI Symbol;Acc:MGI:1920933]	0.0148587	0.01		Nrbp2	nuclear receptor binding protein 2 [Source:MGI Symbol;Acc:MGI:2385017]	0.0155652	not_corrected
Six5	sine oculis-related homeobox 5 [Source:MGI Symbol;Acc:MGI:106220]	0.0173311	0.001		Actr2	ARP2 actin-related protein 2 [Source:MGI Symbol;Acc:MGI:1913963]	0.0148587	0.01		Cep78	centrosomal protein 78 [Source:MGI Symbol;Acc:MGI:1924386]	0.0159184	not_corrected
Atg16l2	autophagy related 16-like 2 (S. cerevisiae) [Source:MGI Symbol;Acc:MGI:1920933]	0.0173311	0.001		Irx2	Iroquois homeobox 2 [Source:MGI Symbol;Acc:MGI:1197526]	0.015212	0.01		Ank1	ankyrin 1, erythroid [Source:MGI Symbol;Acc:MGI:88024]	0.0159184	not_corrected
G6pc3	glucose 6 phosphatase, catalytic, 3 [Source:MGI Symbol;Acc:MGI:1915651]	0.0173311	0.001		2900060N12Rik	RIKEN cDNA 2900060N12 gene [Source:MGI Symbol;Acc:MGI:1920281]	0.015212	0.01		Kcnh7	potassium voltage-gated channel, subfamily H (eag-related), member 7 [Source:MGI Symbol;Acc:MGI:2159566]	0.0159184	not_corrected
Fbln5	fibulin 5 [Source:MGI Symbol;Acc:MGI:1346091]	0.0176842	0.001		Erbin	Erbb2 interacting protein [Source:MGI Symbol;Acc:MGI:1890169]	0.015212	0.01		Sod1	superoxide dismutase 1, soluble [Source:MGI Symbol;Acc:MGI:98351]	0.0159184	not_corrected
Kri1	KRI1 homolog [Source:MGI Symbol;Acc:MGI:2384899]	0.0176842	0.001		3110082I17Rik	RIKEN cDNA 3110082I17 gene [Source:MGI Symbol;Acc:MGI:1920462]	0.0155652	0.01		St6galnac3	ST6 (alpha-N-acetyl-neuraminyl-2,3-beta-galactosyl-1,3)-N-acetylgalactosaminide alpha-2,6-sialyltransferase 3 [Source:MGI Symbol;Acc:MGI:1341828]	0.0162716	not_corrected
Fbxo4	F-box protein 4 [Source:MGI Symbol;Acc:MGI:2146220]	0.0176842	0.001		2700069I18Rik	RIKEN cDNA 2700069I18 gene [Source:MGI Symbol;Acc:MGI:1919858]	0.0155652	0.01		Cntnap5b	contactin associated protein-like 5B [Source:MGI Symbol;Acc:MGI:3664583]	0.0162716	not_corrected
Cdkl3	cyclin-dependent kinase-like 3 [Source:MGI Symbol;Acc:MGI:2388268]	0.0180373	0.001		Sart3	squamous cell carcinoma antigen recognized by T cells 3 [Source:MGI Symbol;Acc:MGI:1858230]	0.0155652	0.01		Pik3r3	phosphoinositide-3-kinase regulatory subunit 3 [Source:MGI Symbol;Acc:MGI:109277]	0.0162716	not_corrected
Ccdc60	coiled-coil domain containing 60 [Source:MGI Symbol;Acc:MGI:2141043]	0.0180373	0.001		Rnf180	ring finger protein 180 [Source:MGI Symbol;Acc:MGI:1919066]	0.0155652	0.01		Trpt1	tRNA phosphotransferase 1 [Source:MGI Symbol;Acc:MGI:1333115]	0.0166248	not_corrected
Iqsec2	IQ motif and Sec7 domain 2 [Source:MGI Symbol;Acc:MGI:3528396]	0.0180373	0.001		Fam227b	family with sequence similarity 227, member B [Source:MGI Symbol;Acc:MGI:1923073]	0.0159184	0.01		Tab2	TGF-beta activated kinase 1/MAP3K7 binding protein 2 [Source:MGI Symbol;Acc:MGI:1915902]	0.0166248	not_corrected
Cnmd	chondromodulin [Source:MGI Symbol;Acc:MGI:1341171]	0.0183904	0.001		Nsmce3	NSE3 homolog, SMC5-SMC6 complex component [Source:MGI Symbol;Acc:MGI:1913897]	0.0159184	0.01		Sv2b	synaptic vesicle glycoprotein 2 b [Source:MGI Symbol;Acc:MGI:1927338]	0.0168897	not_corrected
Rtel1	regulator of telomere elongation helicase 1 [Source:MGI Symbol;Acc:MGI:2139369]	0.0183904	0.001		Mesd	mesoderm development LRP chaperone [Source:MGI Symbol;Acc:MGI:1891421]	0.0159184	0.01		Senp2	SUMO/sentrin specific peptidase 2 [Source:MGI Symbol;Acc:MGI:1923076]	0.0168897	not_corrected
Ticam1	toll-like receptor adaptor molecule 1 [Source:MGI Symbol;Acc:MGI:2147032]	0.0183904	0.001		Lipe	lipase, hormone sensitive [Source:MGI Symbol;Acc:MGI:96790]	0.0162716	0.01		Ano4	anoctamin 4 [Source:MGI Symbol;Acc:MGI:2443344]	0.0171546	not_corrected
Erbin	Erbb2 interacting protein [Source:MGI Symbol;Acc:MGI:1890169]	0.0183904	0.001		Creb3l1	cAMP responsive element binding protein 3-like 1 [Source:MGI Symbol;Acc:MGI:1347062]	0.0162716	0.01		Pgr15l	G protein-coupled receptor 15-like [Source:MGI Symbol;Acc:MGI:2676330]	0.0171546	not_corrected
Zbtb40	zinc finger and BTB domain containing 40 [Source:MGI Symbol;Acc:MGI:2682254]	0.0187434	0.001		Tbcd	tubulin-specific chaperone d [Source:MGI Symbol;Acc:MGI:1919686]	0.0162716	0.01		Camkv	CaM kinase-like vesicle-associated [Source:MGI Symbol;Acc:MGI:2384296]	0.0174194	not_corrected
Nsmce3	NSE3 homolog, SMC5-SMC6 complex component [Source:MGI Symbol;Acc:MGI:1913897]	0.0187434	0.001		Dok6	docking protein 6 [Source:MGI Symbol;Acc:MGI:3639495]	0.0162716	0.01		Kmt2a	lysine (K)-specific methyltransferase 2A [Source:MGI Symbol;Acc:MGI:96995]	0.0174194	not_corrected
Cpeb4	cytoplasmic polyadenylation element binding protein 4 [Source:MGI Symbol;Acc:MGI:1914829]	0.0187434	0.001		Cnmd	chondromodulin [Source:MGI Symbol;Acc:MGI:1341171]	0.0166248	0.01		Irx2	Iroquois homeobox 2 [Source:MGI Symbol;Acc:MGI:1197526]	0.0176842	not_corrected
Trp53cor1	tumor protein p53 pathway corepressor 1 [Source:MGI Symbol;Acc:MGI:3801771]	0.0190964	0.001		Pskh1	protein serine kinase H1 [Source:MGI Symbol;Acc:MGI:3528383]	0.0166248	0.01		Agap1	ArfGAP with GTPase domain, ankyrin repeat and PH domain 1 [Source:MGI Symbol;Acc:MGI:2653690]	0.0176842	not_corrected
Zfp963	zinc finger protein 963 [Source:MGI Symbol;Acc:MGI:4867078]	0.0190964	0.001		Col9a3	collagen, type IX, alpha 3 [Source:MGI Symbol;Acc:MGI:894686]	0.0166248	0.01		Pde8a	phosphodiesterase 8A [Source:MGI Symbol;Acc:MGI:1277116]	0.0179491	not_corrected
Tbcd	tubulin-specific chaperone d [Source:MGI Symbol;Acc:MGI:1919686]	0.0190964	0.001		Tarbp1	TAR RNA binding protein 1 [Source:MGI Symbol;Acc:MGI:4936930]	0.016978	0.01		Mafg	v-maf musculoaponeurotic fibrosarcoma oncogene family, protein G (avian) [Source:MGI Symbol;Acc:MGI:96911]	0.0179491	not_corrected
Rnf180	ring finger protein 180 [Source:MGI Symbol;Acc:MGI:1919066]	0.0190964	0.001		Fam168b	family with sequence similarity 168, member B [Source:MGI Symbol;Acc:MGI:2448487]	0.016978	0.01		BC028528	cDNA sequence BC028528 [Source:MGI Symbol;Acc:MGI:2385885]	0.0182139	not_corrected
Adamts12	a disintegrin-like and metallopeptidase (reprolysin type) with thrombospondin type 1 motif, 12 [Source:MGI Symbol;Acc:MGI:2146046]	0.0194494	0.001		Scara3	scavenger receptor class A, member 3 [Source:MGI Symbol;Acc:MGI:2444418]	0.0173311	0.01		Zcchc17	zinc finger, CCHC domain containing 17 [Source:MGI Symbol;Acc:MGI:1919955]	0.0182139	not_corrected
Mllt6	myeloid/lymphoid or mixed-lineage leukemia; translocated to, 6 [Source:MGI Symbol;Acc:MGI:1935145]	0.0194494	0.001		1700028E10Rik	RIKEN cDNA 1700028E10 gene [Source:MGI Symbol;Acc:MGI:1916713]	0.0173311	0.01		Olfm3	olfactomedin 3 [Source:MGI Symbol;Acc:MGI:2387329]	0.0184787	not_corrected
Firre	functional intergenic repeating RNA element [Source:MGI Symbol;Acc:MGI:2147989]	0.0194494	0.001		B930036N10Rik	RIKEN cDNA B930036N10 gene [Source:MGI Symbol;Acc:MGI:3702496]	0.0173311	0.01		Nrg4	neuregulin 4 [Source:MGI Symbol;Acc:MGI:1933833]	0.0184787	not_corrected
Kank2	KN motif and ankyrin repeat domains 2 [Source:MGI Symbol;Acc:MGI:2384568]	0.0198024	0.001		Ift57	intraflagellar transport 57 [Source:MGI Symbol;Acc:MGI:1921166]	0.0173311	0.01		Actr2	ARP2 actin-related protein 2 [Source:MGI Symbol;Acc:MGI:1913963]	0.0184787	not_corrected
Cped1	cadherin-like and PC-esterase domain containing 1 [Source:MGI Symbol;Acc:MGI:2444814]	0.0198024	0.001		Nbeal2	neurobeachin-like 2 [Source:MGI Symbol;Acc:MGI:2448554]	0.0176842	0.01		Pex5l	peroxisomal biogenesis factor 5-like [Source:MGI Symbol;Acc:MGI:1916672]	0.0187435	not_corrected
Mfsd11	major facilitator superfamily domain containing 11 [Source:MGI Symbol;Acc:MGI:1917150]	0.0198024	0.001		Rab28	RAB28, member RAS oncogene family [Source:MGI Symbol;Acc:MGI:1917285]	0.0176842	0.01		Prss50	protease, serine 50 [Source:MGI Symbol;Acc:MGI:2447303]	0.0187435	not_corrected
Lhcgr	luteinizing hormone/choriogonadotropin receptor [Source:MGI Symbol;Acc:MGI:96783]	0.0201553	0.001		Tmem82	transmembrane protein 82 [Source:MGI Symbol;Acc:MGI:2384869]	0.0180373	0.01		Atp1b1	ATPase, Na+/K+ transporting, beta 1 polypeptide [Source:MGI Symbol;Acc:MGI:88108]	0.0187435	not_corrected
Samd12	sterile alpha motif domain containing 12 [Source:MGI Symbol;Acc:MGI:2444518]	0.0201553	0.001		6530409C15Rik	RIKEN cDNA 6530409C15 gene [Source:MGI Symbol;Acc:MGI:1923474]	0.0180373	0.01		Zfp408	zinc finger protein 408 [Source:MGI Symbol;Acc:MGI:2685857]	0.0190082	not_corrected
H2-K1	histocompatibility 2, K1, K region [Source:MGI Symbol;Acc:MGI:95904]	0.0201553	0.001		Cct8	chaperonin containing Tcp1, subunit 8 (theta) [Source:MGI Symbol;Acc:MGI:107183]	0.0180373	0.01		Kcnc2	potassium voltage gated channel, Shaw-related subfamily, member 2 [Source:MGI Symbol;Acc:MGI:96668]	0.0190082	not_corrected
Ptgr2	prostaglandin reductase 2 [Source:MGI Symbol;Acc:MGI:1916372]	0.0201553	0.001		Cdkl3	cyclin-dependent kinase-like 3 [Source:MGI Symbol;Acc:MGI:2388268]	0.0183904	0.01		Cbx6	chromobox 6 [Source:MGI Symbol;Acc:MGI:3512628]	0.0190082	not_corrected
2900052N01Rik	RIKEN cDNA 2900052N01 gene [Source:MGI Symbol;Acc:MGI:1920290]	0.0205082	0.001		Brat1	BRCA1-associated ATM activator 1 [Source:MGI Symbol;Acc:MGI:1891679]	0.0183904	0.01		Pianp	PILR alpha associated neural protein [Source:MGI Symbol;Acc:MGI:2441908]	0.019273	not_corrected
Prune1	prune exopolyphosphatase [Source:MGI Symbol;Acc:MGI:1925152]	0.0205082	0.001		Ctnna2	catenin (cadherin associated protein), alpha 2 [Source:MGI Symbol;Acc:MGI:88275]	0.0183904	0.01		Rhoj	ras homolog family member J [Source:MGI Symbol;Acc:MGI:1931551]	0.019273	not_corrected
Osbpl8	oxysterol binding protein-like 8 [Source:MGI Symbol;Acc:MGI:2443807]	0.0205082	0.001		Slc25a21	solute carrier family 25 (mitochondrial oxodicarboxylate carrier), member 21 [Source:MGI Symbol;Acc:MGI:2445059]	0.0187434	0.01		Ctnnbip1	catenin beta interacting protein 1 [Source:MGI Symbol;Acc:MGI:1915756]	0.019273	not_corrected
Adra1a	adrenergic receptor, alpha 1a [Source:MGI Symbol;Acc:MGI:104773]	0.0208611	0.001		Fosl1	fos-like antigen 1 [Source:MGI Symbol;Acc:MGI:107179]	0.0187434	0.01		Rbm20	RNA binding motif protein 20 [Source:MGI Symbol;Acc:MGI:1920963]	0.0195377	not_corrected
Spata48	spermatogenesis associated 48 [Source:MGI Symbol;Acc:MGI:1921112]	0.0208611	0.001		Sf3b3	splicing factor 3b, subunit 3 [Source:MGI Symbol;Acc:MGI:1289341]	0.0187434	0.01		Elovl6	ELOVL family member 6, elongation of long chain fatty acids (yeast) [Source:MGI Symbol;Acc:MGI:2156528]	0.0195377	not_corrected
Lrrk1	leucine-rich repeat kinase 1 [Source:MGI Symbol;Acc:MGI:2142227]	0.0208611	0.001		Asb5	ankyrin repeat and SOCs box-containing 5 [Source:MGI Symbol;Acc:MGI:1923544]	0.0190964	0.01		Frem2	Fras1 related extracellular matrix protein 2 [Source:MGI Symbol;Acc:MGI:2444465]	0.0195377	not_corrected
Actr2	ARP2 actin-related protein 2 [Source:MGI Symbol;Acc:MGI:1913963]	0.0208611	0.001		H2-K1	histocompatibility 2, K1, K region [Source:MGI Symbol;Acc:MGI:95904]	0.0190964	0.01		Dusp15	dual specificity phosphatase-like 15 [Source:MGI Symbol;Acc:MGI:1934928]	0.0198025	not_corrected
Cdc42ep1	CDC42 effector protein (Rho GTPase binding) 1 [Source:MGI Symbol;Acc:MGI:1929763]	0.021214	0.001		Kmt2a	lysine (K)-specific methyltransferase 2A [Source:MGI Symbol;Acc:MGI:96995]	0.0190964	0.01		P2rx4	purinergic receptor P2X, ligand-gated ion channel 4 [Source:MGI Symbol;Acc:MGI:1338859]	0.0198025	not_corrected
Slc7a7	solute carrier family 7 (cationic amino acid transporter, y+ system), member 7 [Source:MGI Symbol;Acc:MGI:1337120]	0.021214	0.001		Ganc	glucosidase, alpha; neutral C [Source:MGI Symbol;Acc:MGI:1923301]	0.0194494	0.01		Ccser1	coiled-coil serine rich 1 [Source:MGI Symbol;Acc:MGI:3045354]	0.0198025	not_corrected
Svopl	SV2 related protein homolog (rat)-like [Source:MGI Symbol;Acc:MGI:2444335]	0.021214	0.001		Zswim9	zinc finger SWIM-type containing 9 [Source:MGI Symbol;Acc:MGI:2447816]	0.0194494	0.01		Sptbn2	spectrin beta, non-erythrocytic 2 [Source:MGI Symbol;Acc:MGI:1313261]	0.0200672	not_corrected
Wsb1	WD repeat and SOCS box-containing 1 [Source:MGI Symbol;Acc:MGI:1926139]	0.021214	0.001		Naglu	alpha-N-acetylglucosaminidase (Sanfilippo disease IIIB) [Source:MGI Symbol;Acc:MGI:1351641]	0.0194494	0.01		Pkig	protein kinase inhibitor, gamma [Source:MGI Symbol;Acc:MGI:1343086]	0.0200672	not_corrected
Ltbp1	latent transforming growth factor beta binding protein 1 [Source:MGI Symbol;Acc:MGI:109151]	0.0215669	0.001		Aff3	AF4/FMR2 family, member 3 [Source:MGI Symbol;Acc:MGI:106927]	0.0194494	0.01		Rab3c	RAB3C, member RAS oncogene family [Source:MGI Symbol;Acc:MGI:1914545]	0.0203319	not_corrected
D330041H03Rik	RIKEN cDNA D330041H03 gene [Source:MGI Symbol;Acc:MGI:3603827]	0.0215669	0.001		Trp53cor1	tumor protein p53 pathway corepressor 1 [Source:MGI Symbol;Acc:MGI:3801771]	0.0198024	0.01		H2-K1	histocompatibility 2, K1, K region [Source:MGI Symbol;Acc:MGI:95904]	0.0203319	not_corrected
Rxylt1	ribitol xylosyltransferase 1 [Source:MGI Symbol;Acc:MGI:2384919]	0.0215669	0.001		Wnt7a	wingless-type MMTV integration site family, member 7A [Source:MGI Symbol;Acc:MGI:98961]	0.0198024	0.01		Coq2	coenzyme Q2 4-hydroxybenzoate polyprenyltransferase [Source:MGI Symbol;Acc:MGI:1919133]	0.0203319	not_corrected
Ptprs	protein tyrosine phosphatase, receptor type, S [Source:MGI Symbol;Acc:MGI:97815]	0.0215669	0.001		Tmem44	transmembrane protein 44 [Source:MGI Symbol;Acc:MGI:1924489]	0.0198024	0.01		Mir124-2hg	Mir124-2 host gene (non-protein coding) [Source:MGI Symbol;Acc:MGI:1917691]	0.0205966	not_corrected
Efhd1	EF hand domain containing 1 [Source:MGI Symbol;Acc:MGI:1921607]	0.0219197	0.001		Kcnq1ot1	KCNQ1 overlapping transcript 1 [Source:MGI Symbol;Acc:MGI:1926855]	0.0198024	0.01		Kctd4	potassium channel tetramerisation domain containing 4 [Source:MGI Symbol;Acc:MGI:1914766]	0.0208613	not_corrected
Malrd1	MAM and LDL receptor class A domain containing 1 [Source:MGI Symbol;Acc:MGI:1928271]	0.0219197	0.001		Zmat5	zinc finger, matrin type 5 [Source:MGI Symbol;Acc:MGI:1914428]	0.0201553	0.01		Adgrl1	adhesion G protein-coupled receptor L1 [Source:MGI Symbol;Acc:MGI:1929461]	0.0208613	not_corrected
6530409C15Rik	RIKEN cDNA 6530409C15 gene [Source:MGI Symbol;Acc:MGI:1923474]	0.0219197	0.001		Bcs1l	BCS1-like (yeast) [Source:MGI Symbol;Acc:MGI:1914071]	0.0201553	0.01		Gcfc2	GC-rich sequence DNA binding factor 2 [Source:MGI Symbol;Acc:MGI:2141656]	0.021126	not_corrected
Msl1	male specific lethal 1 [Source:MGI Symbol;Acc:MGI:1921276]	0.0219197	0.001		Ptprf	protein tyrosine phosphatase, receptor type, F [Source:MGI Symbol;Acc:MGI:102695]	0.0201553	0.01		Btd	biotinidase [Source:MGI Symbol;Acc:MGI:1347001]	0.021126	not_corrected
Ror1	receptor tyrosine kinase-like orphan receptor 1 [Source:MGI Symbol;Acc:MGI:1347520]	0.0222725	0.001		Ltbp1	latent transforming growth factor beta binding protein 1 [Source:MGI Symbol;Acc:MGI:109151]	0.0205082	0.01		Ctnna2	catenin (cadherin associated protein), alpha 2 [Source:MGI Symbol;Acc:MGI:88275]	0.021126	not_corrected
Lmnb2	lamin B2 [Source:MGI Symbol;Acc:MGI:96796]	0.0222725	0.001		Kri1	KRI1 homolog [Source:MGI Symbol;Acc:MGI:2384899]	0.0205082	0.01		Rxylt1	ribitol xylosyltransferase 1 [Source:MGI Symbol;Acc:MGI:2384919]	0.0213907	not_corrected
Gdpd2	glycerophosphodiester phosphodiesterase domain containing 2 [Source:MGI Symbol;Acc:MGI:1918834]	0.0222725	0.001		Mroh5	maestro heat-like repeat family member 5 [Source:MGI Symbol;Acc:MGI:2685474]	0.0205082	0.01		Aff3	AF4/FMR2 family, member 3 [Source:MGI Symbol;Acc:MGI:106927]	0.0213907	not_corrected
Smim4	small integral membrane protein 4 [Source:MGI Symbol;Acc:MGI:1913737]	0.0222725	0.001		Pik3r3	phosphoinositide-3-kinase regulatory subunit 3 [Source:MGI Symbol;Acc:MGI:109277]	0.0205082	0.01		6820408C15Rik	RIKEN cDNA 6820408C15 gene [Source:MGI Symbol;Acc:MGI:3045333]	0.0216553	not_corrected
Aqp9	aquaporin 9 [Source:MGI Symbol;Acc:MGI:1891066]	0.0226253	0.001		Nrg1	neuregulin 1 [Source:MGI Symbol;Acc:MGI:96083]	0.0208611	0.01		Hey1	hairy/enhancer-of-split related with YRPW motif 1 [Source:MGI Symbol;Acc:MGI:1341800]	0.0216553	not_corrected
5430403G16Rik	RIKEN cDNA 5430403G16 gene [Source:MGI Symbol;Acc:MGI:1924450]	0.0226253	0.001		Nrg1	neuregulin 1 [Source:MGI Symbol;Acc:MGI:96083]	0.0208611	0.01		Mag	myelin-associated glycoprotein [Source:MGI Symbol;Acc:MGI:96912]	0.02192	not_corrected
Rhoj	ras homolog family member J [Source:MGI Symbol;Acc:MGI:1931551]	0.0226253	0.001		Ino80d	INO80 complex subunit D [Source:MGI Symbol;Acc:MGI:3027003]	0.0208611	0.01		Osbpl8	oxysterol binding protein-like 8 [Source:MGI Symbol;Acc:MGI:2443807]	0.02192	not_corrected
2210408I21Rik	RIKEN cDNA 2210408I21 gene [Source:MGI Symbol;Acc:MGI:1919621]	0.0226253	0.001		Trim30d	tripartite motif-containing 30D [Source:MGI Symbol;Acc:MGI:3035181]	0.021214	0.01		Hs6st3	heparan sulfate 6-O-sulfotransferase 3 [Source:MGI Symbol;Acc:MGI:1354960]	0.0221846	not_corrected
Stard8	START domain containing 8 [Source:MGI Symbol;Acc:MGI:2448556]	0.022978	0.001		2210408I21Rik	RIKEN cDNA 2210408I21 gene [Source:MGI Symbol;Acc:MGI:1919621]	0.021214	0.01		Parp9	poly (ADP-ribose) polymerase family, member 9 [Source:MGI Symbol;Acc:MGI:1933117]	0.0221846	not_corrected
Gas8	growth arrest specific 8 [Source:MGI Symbol;Acc:MGI:1202386]	0.022978	0.001		Hpse2	heparanase 2 [Source:MGI Symbol;Acc:MGI:2685814]	0.0215669	0.01		Thbs3	thrombospondin 3 [Source:MGI Symbol;Acc:MGI:98739]	0.0221846	not_corrected
A730011C13Rik	RIKEN cDNA A730011C13 gene [Source:MGI Symbol;Acc:MGI:2442973]	0.022978	0.001		Lbhd1	LBH domain containing 1 [Source:MGI Symbol;Acc:MGI:5516029]	0.0215669	0.01		Gabra4	gamma-aminobutyric acid (GABA) A receptor, subunit alpha 4 [Source:MGI Symbol;Acc:MGI:95616]	0.0224492	not_corrected
Cdc42se2	CDC42 small effector 2 [Source:MGI Symbol;Acc:MGI:1919979]	0.022978	0.001		Pcgf6	polycomb group ring finger 6 [Source:MGI Symbol;Acc:MGI:1918291]	0.0219197	0.01		Zkscan2	zinc finger with KRAB and SCAN domains 2 [Source:MGI Symbol;Acc:MGI:2444060]	0.0227139	not_corrected
Ccdc18	coiled-coil domain containing 18 [Source:MGI Symbol;Acc:MGI:1922974]	0.0233308	0.001		Slc6a20b	solute carrier family 6 (neurotransmitter transporter), member 20B [Source:MGI Symbol;Acc:MGI:1336891]	0.0219197	0.01		Cfap20	cilia and flagella associated protein 20 [Source:MGI Symbol;Acc:MGI:107428]	0.0227139	not_corrected
Imp4	IMP4, U3 small nucleolar ribonucleoprotein [Source:MGI Symbol;Acc:MGI:106572]	0.0233308	0.001		Ptprs	protein tyrosine phosphatase, receptor type, S [Source:MGI Symbol;Acc:MGI:97815]	0.0219197	0.01		Mtor	mechanistic target of rapamycin kinase [Source:MGI Symbol;Acc:MGI:1928394]	0.0227139	not_corrected
Micu1	mitochondrial calcium uptake 1 [Source:MGI Symbol;Acc:MGI:2384909]	0.0233308	0.001		Fancc	Fanconi anemia, complementation group C [Source:MGI Symbol;Acc:MGI:95480]	0.0222725	0.01		Mob3c	MOB kinase activator 3C [Source:MGI Symbol;Acc:MGI:2140623]	0.0229785	not_corrected
Fancc	Fanconi anemia, complementation group C [Source:MGI Symbol;Acc:MGI:95480]	0.0236835	0.001		Ccdc78	coiled-coil domain containing 78 [Source:MGI Symbol;Acc:MGI:2685784]	0.0222725	0.01		Ccdc78	coiled-coil domain containing 78 [Source:MGI Symbol;Acc:MGI:2685784]	0.0229785	not_corrected
Zfp408	zinc finger protein 408 [Source:MGI Symbol;Acc:MGI:2685857]	0.0236835	0.001		Cby1	chibby family member 1, beta catenin antagonist [Source:MGI Symbol;Acc:MGI:1920989]	0.0222725	0.01		Dennd4a	DENN/MADD domain containing 4A [Source:MGI Symbol;Acc:MGI:2142979]	0.0229785	not_corrected
Setbp1	SET binding protein 1 [Source:MGI Symbol;Acc:MGI:1933199]	0.0236835	0.001		St6galnac5	ST6 (alpha-N-acetyl-neuraminyl-2,3-beta-galactosyl-1,3)-N-acetylgalactosaminide alpha-2,6-sialyltransferase 5 [Source:MGI Symbol;Acc:MGI:1349471]	0.0226253	0.01		Kif5a	kinesin family member 5A [Source:MGI Symbol;Acc:MGI:109564]	0.023243	not_corrected
4833438C02Rik	RIKEN cDNA 4833438C02 gene [Source:MGI Symbol;Acc:MGI:2147599]	0.0240362	0.001		Galnt10	polypeptide N-acetylgalactosaminyltransferase 10 [Source:MGI Symbol;Acc:MGI:1890480]	0.0226253	0.01		6330418K02Rik	RIKEN cDNA 6330418K02 gene [Source:MGI Symbol;Acc:MGI:3697416]	0.023243	not_corrected
Gns	glucosamine (N-acetyl)-6-sulfatase [Source:MGI Symbol;Acc:MGI:1922862]	0.0240362	0.001		Pacrg	PARK2 co-regulated [Source:MGI Symbol;Acc:MGI:1916560]	0.0226253	0.01		2210408I21Rik	RIKEN cDNA 2210408I21 gene [Source:MGI Symbol;Acc:MGI:1919621]	0.023243	not_corrected
Lpo	lactoperoxidase [Source:MGI Symbol;Acc:MGI:1923363]	0.0243888	0.001		1700027A15Rik	RIKEN cDNA 1700027A15 gene [Source:MGI Symbol;Acc:MGI:1916699]	0.022978	0.01		Brf2	BRF2, RNA polymerase III transcription initiation factor 50kDa subunit [Source:MGI Symbol;Acc:MGI:1913903]	0.0235076	not_corrected
Ddx3x	DEAD box helicase 3, X-linked [Source:MGI Symbol;Acc:MGI:103064]	0.0243888	0.001		Pde1c	phosphodiesterase 1C [Source:MGI Symbol;Acc:MGI:108413]	0.022978	0.01		Slc39a9	solute carrier family 39 (zinc transporter), member 9 [Source:MGI Symbol;Acc:MGI:1914820]	0.0235076	not_corrected
Irx5	Iroquois homeobox 5 [Source:MGI Symbol;Acc:MGI:1859086]	0.0247415	0.001		Emp2	epithelial membrane protein 2 [Source:MGI Symbol;Acc:MGI:1098726]	0.022978	0.01		Trim30a	tripartite motif-containing 30A [Source:MGI Symbol;Acc:MGI:98178]	0.0237722	not_corrected
1600014C10Rik	RIKEN cDNA 1600014C10 gene [Source:MGI Symbol;Acc:MGI:1919494]	0.0247415	0.001		Lenep	lens epithelial protein [Source:MGI Symbol;Acc:MGI:1930020]	0.0233308	0.01		B930036N10Rik	RIKEN cDNA B930036N10 gene [Source:MGI Symbol;Acc:MGI:3702496]	0.0237722	not_corrected
Zfp382	zinc finger protein 382 [Source:MGI Symbol;Acc:MGI:3588204]	0.0247415	0.001		Prpf38b	PRP38 pre-mRNA processing factor 38 (yeast) domain containing B [Source:MGI Symbol;Acc:MGI:1914171]	0.0233308	0.01		Gnptg	N-acetylglucosamine-1-phosphotransferase, gamma subunit [Source:MGI Symbol;Acc:MGI:2147006]	0.0237722	not_corrected
Rab24	RAB24, member RAS oncogene family [Source:MGI Symbol;Acc:MGI:105065]	0.0247415	0.001		Eef1aknmt	EEF1A lysine and N-terminal methyltransferase [Source:MGI Symbol;Acc:MGI:1918699]	0.0236835	0.01		Riox2	ribosomal oxygenase 2 [Source:MGI Symbol;Acc:MGI:1914264]	0.0240367	not_corrected
Etv4	ets variant 4 [Source:MGI Symbol;Acc:MGI:99423]	0.0250941	0.001		Ntng1	netrin G1 [Source:MGI Symbol;Acc:MGI:1934028]	0.0236835	0.01		Pla2g4b	phospholipase A2, group IVB (cytosolic) [Source:MGI Symbol;Acc:MGI:2384819]	0.0240367	not_corrected
Cmya5	cardiomyopathy associated 5 [Source:MGI Symbol;Acc:MGI:1923719]	0.0250941	0.001		Ro60	Ro60, Y RNA binding protein [Source:MGI Symbol;Acc:MGI:106652]	0.0236835	0.01		Wdr26	WD repeat domain 26 [Source:MGI Symbol;Acc:MGI:1923825]	0.0240367	not_corrected
Plekhg2	pleckstrin homology domain containing, family G (with RhoGef domain) member 2 [Source:MGI Symbol;Acc:MGI:2141874]	0.0250941	0.001		Stard8	START domain containing 8 [Source:MGI Symbol;Acc:MGI:2448556]	0.0240362	0.01		Prune1	prune exopolyphosphatase [Source:MGI Symbol;Acc:MGI:1925152]	0.0243013	not_corrected
Foxk2	forkhead box K2 [Source:MGI Symbol;Acc:MGI:1916087]	0.0250941	0.001		Phldb2	pleckstrin homology like domain, family B, member 2 [Source:MGI Symbol;Acc:MGI:2444981]	0.0240362	0.01		Cpeb4	cytoplasmic polyadenylation element binding protein 4 [Source:MGI Symbol;Acc:MGI:1914829]	0.0243013	not_corrected
Tmem100	transmembrane protein 100 [Source:MGI Symbol;Acc:MGI:1915138]	0.0254467	0.001		A730011C13Rik	RIKEN cDNA A730011C13 gene [Source:MGI Symbol;Acc:MGI:2442973]	0.0240362	0.01		Cracr2a	calcium release activated channel regulator 2A [Source:MGI Symbol;Acc:MGI:2685919]	0.0245658	not_corrected
Eda	ectodysplasin-A [Source:MGI Symbol;Acc:MGI:1195272]	0.0257992	0.001		Pde4dip	phosphodiesterase 4D interacting protein (myomegalin) [Source:MGI Symbol;Acc:MGI:1891434]	0.0240362	0.01		Prkcb	protein kinase C, beta [Source:MGI Symbol;Acc:MGI:97596]	0.0245658	not_corrected
Dennd4b	DENN/MADD domain containing 4B [Source:MGI Symbol;Acc:MGI:2446201]	0.0257992	0.001		Med12	mediator complex subunit 12 [Source:MGI Symbol;Acc:MGI:1926212]	0.0243888	0.01		Slc4a10	solute carrier family 4, sodium bicarbonate cotransporter-like, member 10 [Source:MGI Symbol;Acc:MGI:2150150]	0.0248303	not_corrected
D2hgdh	D-2-hydroxyglutarate dehydrogenase [Source:MGI Symbol;Acc:MGI:2138209]	0.0257992	0.001		Copg2	coatomer protein complex, subunit gamma 2 [Source:MGI Symbol;Acc:MGI:1858683]	0.0243888	0.01		Nup43	nucleoporin 43 [Source:MGI Symbol;Acc:MGI:1917162]	0.0248303	not_corrected
Unc79	unc-79 homolog [Source:MGI Symbol;Acc:MGI:2684729]	0.0257992	0.001		Prune1	prune exopolyphosphatase [Source:MGI Symbol;Acc:MGI:1925152]	0.0247415	0.01		Usp6nl	USP6 N-terminal like [Source:MGI Symbol;Acc:MGI:2138893]	0.0248303	not_corrected
Catsper2	cation channel, sperm associated 2 [Source:MGI Symbol;Acc:MGI:2387404]	0.0261518	0.001		Plekhg2	pleckstrin homology domain containing, family G (with RhoGef domain) member 2 [Source:MGI Symbol;Acc:MGI:2141874]	0.0247415	0.01		Adam11	a disintegrin and metallopeptidase domain 11 [Source:MGI Symbol;Acc:MGI:1098667]	0.0250948	not_corrected
Gstz1	glutathione transferase zeta 1 (maleylacetoacetate isomerase) [Source:MGI Symbol;Acc:MGI:1341859]	0.0261518	0.001		Micu1	mitochondrial calcium uptake 1 [Source:MGI Symbol;Acc:MGI:2384909]	0.0247415	0.01		4933407K13Rik	RIKEN cDNA 4933407K13 gene [Source:MGI Symbol;Acc:MGI:1921646]	0.0250948	not_corrected
Nr1h2	nuclear receptor subfamily 1, group H, member 2 [Source:MGI Symbol;Acc:MGI:1352463]	0.0265043	0.001		Alg12	asparagine-linked glycosylation 12 (alpha-1,6-mannosyltransferase) [Source:MGI Symbol;Acc:MGI:2385025]	0.0250941	0.01		Ctnnb1	catenin (cadherin associated protein), beta 1 [Source:MGI Symbol;Acc:MGI:88276]	0.0250948	not_corrected
Slc25a21	solute carrier family 25 (mitochondrial oxodicarboxylate carrier), member 21 [Source:MGI Symbol;Acc:MGI:2445059]	0.0265043	0.001		Morn3	MORN repeat containing 3 [Source:MGI Symbol;Acc:MGI:1922140]	0.0250941	0.01		Pde1c	phosphodiesterase 1C [Source:MGI Symbol;Acc:MGI:108413]	0.0253593	not_corrected
Tmem44	transmembrane protein 44 [Source:MGI Symbol;Acc:MGI:1924489]	0.0265043	0.001		Mettl5os	methyltransferase like 5, opposite strand [Source:MGI Symbol;Acc:MGI:1922537]	0.0254467	0.01		Lbhd1	LBH domain containing 1 [Source:MGI Symbol;Acc:MGI:5516029]	0.0253593	not_corrected
Mon2	MON2 homolog, regulator of endosome to Golgi trafficking [Source:MGI Symbol;Acc:MGI:1914324]	0.0265043	0.001		Gipc1	GIPC PDZ domain containing family, member 1 [Source:MGI Symbol;Acc:MGI:1926252]	0.0254467	0.01		Med12	mediator complex subunit 12 [Source:MGI Symbol;Acc:MGI:1926212]	0.0256238	not_corrected
Natd1	N-acetyltransferase domain containing 1 [Source:MGI Symbol;Acc:MGI:1344388]	0.0267687	0.001		Nemp2	nuclear envelope integral membrane protein 2 [Source:MGI Symbol;Acc:MGI:2444113]	0.0257992	0.01		Alg3	asparagine-linked glycosylation 3 (alpha-1,3-mannosyltransferase) [Source:MGI Symbol;Acc:MGI:1098592]	0.0256238	not_corrected
Mtg1	mitochondrial ribosome-associated GTPase 1 [Source:MGI Symbol;Acc:MGI:2685015]	0.0267687	0.001		Lrrc27	leucine rich repeat containing 27 [Source:MGI Symbol;Acc:MGI:1923862]	0.0257992	0.01		Agbl4	ATP/GTP binding protein-like 4 [Source:MGI Symbol;Acc:MGI:1918244]	0.0256238	not_corrected
Sncaip	synuclein, alpha interacting protein (synphilin) [Source:MGI Symbol;Acc:MGI:1915097]	0.0267687	0.001		Ddb1	damage specific DNA binding protein 1 [Source:MGI Symbol;Acc:MGI:1202384]	0.0257992	0.01		Unc13a	unc-13 homolog A [Source:MGI Symbol;Acc:MGI:3051532]	0.0258883	not_corrected
Adgrf2	adhesion G protein-coupled receptor F2 [Source:MGI Symbol;Acc:MGI:2182728]	0.0270331	0.001		Etv4	ets variant 4 [Source:MGI Symbol;Acc:MGI:99423]	0.0261518	0.01		Ticam1	toll-like receptor adaptor molecule 1 [Source:MGI Symbol;Acc:MGI:2147032]	0.0258883	not_corrected
Ccdc78	coiled-coil domain containing 78 [Source:MGI Symbol;Acc:MGI:2685784]	0.0270331	0.001		Chn1os3	chimerin 1, opposite strand 3 [Source:MGI Symbol;Acc:MGI:3705094]	0.0261518	0.01		Slc25a51	solute carrier family 25, member 51 [Source:MGI Symbol;Acc:MGI:2684984]	0.0258883	not_corrected
Snx12	sorting nexin 12 [Source:MGI Symbol;Acc:MGI:1919331]	0.0270331	0.001		Itih5	inter-alpha-trypsin inhibitor, heavy chain 5 [Source:MGI Symbol;Acc:MGI:1925751]	0.0261518	0.01		Nek8	NIMA (never in mitosis gene a)-related expressed kinase 8 [Source:MGI Symbol;Acc:MGI:1890646]	0.0261527	not_corrected
C2	complement component 2 (within H-2S) [Source:MGI Symbol;Acc:MGI:88226]	0.0272974	0.001		Stx4a	syntaxin 4A (placental) [Source:MGI Symbol;Acc:MGI:893577]	0.0265043	0.01		Tmem205	transmembrane protein 205 [Source:MGI Symbol;Acc:MGI:3045495]	0.0261527	not_corrected
Manea	mannosidase, endo-alpha [Source:MGI Symbol;Acc:MGI:2444484]	0.0272974	0.001		Acvr1c	activin A receptor, type IC [Source:MGI Symbol;Acc:MGI:2661081]	0.0268568	0.01		Ptprf	protein tyrosine phosphatase, receptor type, F [Source:MGI Symbol;Acc:MGI:102695]	0.0261527	not_corrected
Lin52	lin-52 DREAM MuvB core complex component [Source:MGI Symbol;Acc:MGI:3045391]	0.0272974	0.001		Spata48	spermatogenesis associated 48 [Source:MGI Symbol;Acc:MGI:1921112]	0.0268568	0.01		Hars2	histidyl-tRNA synthetase 2 [Source:MGI Symbol;Acc:MGI:1918041]	0.0264172	not_corrected
Pax6	paired box 6 [Source:MGI Symbol;Acc:MGI:97490]	0.0275617	0.001		Emsy	EMSY, BRCA2-interacting transcriptional repressor [Source:MGI Symbol;Acc:MGI:1924203]	0.0268568	0.01		Slc6a20b	solute carrier family 6 (neurotransmitter transporter), member 20B [Source:MGI Symbol;Acc:MGI:1336891]	0.0264172	not_corrected
Parp9	poly (ADP-ribose) polymerase family, member 9 [Source:MGI Symbol;Acc:MGI:1933117]	0.0275617	0.001		Sntb1	syntrophin, basic 1 [Source:MGI Symbol;Acc:MGI:101781]	0.0272093	0.01		Efcab14	EF-hand calcium binding domain 14 [Source:MGI Symbol;Acc:MGI:2442397]	0.0264172	not_corrected
Arsb	arylsulfatase B [Source:MGI Symbol;Acc:MGI:88075]	0.0275617	0.001		Garnl3	GTPase activating RANGAP domain-like 3 [Source:MGI Symbol;Acc:MGI:2139309]	0.0272093	0.01		Prickle1	prickle planar cell polarity protein 1 [Source:MGI Symbol;Acc:MGI:1916034]	0.0266816	not_corrected
Exosc2	exosome component 2 [Source:MGI Symbol;Acc:MGI:2385133]	0.0278261	0.001		Tardbp	TAR DNA binding protein [Source:MGI Symbol;Acc:MGI:2387629]	0.0272093	0.01		Myo1c	myosin IC [Source:MGI Symbol;Acc:MGI:106612]	0.0266816	not_corrected
Brd3os	bromodomain containing 3, opposite strand [Source:MGI Symbol;Acc:MGI:106557]	0.0278261	0.001		C2	complement component 2 (within H-2S) [Source:MGI Symbol;Acc:MGI:88226]	0.0274736	0.01		Pip4p1	phosphatidylinositol-4,5-bisphosphate 4-phosphatase 1 [Source:MGI Symbol;Acc:MGI:2448501]	0.026946	not_corrected
Sec23a	SEC23 homolog A, COPII coat complex component [Source:MGI Symbol;Acc:MGI:1349635]	0.0278261	0.001		Pigx	phosphatidylinositol glycan anchor biosynthesis, class X [Source:MGI Symbol;Acc:MGI:1919334]	0.0274736	0.01		Ift20	intraflagellar transport 20 [Source:MGI Symbol;Acc:MGI:1915585]	0.026946	not_corrected
Sema4g	sema domain, immunoglobulin domain (Ig), transmembrane domain (TM) and short cytoplasmic domain, (semaphorin) 4G [Source:MGI Symbol;Acc:MGI:1347047]	0.0280904	0.001		Uba1	ubiquitin-like modifier activating enzyme 1 [Source:MGI Symbol;Acc:MGI:98890]	0.0274736	0.01		Nox4	NADPH oxidase 4 [Source:MGI Symbol;Acc:MGI:1354184]	0.0272105	not_corrected
Mfsd14b	major facilitator superfamily domain containing 14B [Source:MGI Symbol;Acc:MGI:1913881]	0.0280904	0.001		Bcas3os1	BCAS3 microtubule associated cell migration factor, opposite strand 1 [Source:MGI Symbol;Acc:MGI:1918739]	0.027738	0.01		Klc1	kinesin light chain 1 [Source:MGI Symbol;Acc:MGI:107978]	0.0272105	not_corrected
Nhlrc3	NHL repeat containing 3 [Source:MGI Symbol;Acc:MGI:2444520]	0.0283547	0.001		Abcc3	ATP-binding cassette, sub-family C (CFTR/MRP), member 3 [Source:MGI Symbol;Acc:MGI:1923658]	0.027738	0.01		Rxrg	retinoid X receptor gamma [Source:MGI Symbol;Acc:MGI:98216]	0.0274749	not_corrected
Smarcc2	SWI/SNF related, matrix associated, actin dependent regulator of chromatin, subfamily c, member 2 [Source:MGI Symbol;Acc:MGI:1915344]	0.0283547	0.001		Med13	mediator complex subunit 13 [Source:MGI Symbol;Acc:MGI:3029632]	0.027738	0.01		Tpgs2	tubulin polyglutamylase complex subunit 2 [Source:MGI Symbol;Acc:MGI:1913898]	0.0274749	not_corrected
4930599N23Rik	RIKEN cDNA 4930599N23 gene [Source:MGI Symbol;Acc:MGI:1922629]	0.028619	0.001		Nmnat1	nicotinamide nucleotide adenylyltransferase 1 [Source:MGI Symbol;Acc:MGI:1913704]	0.0280023	0.01		Gpr101	G protein-coupled receptor 101 [Source:MGI Symbol;Acc:MGI:2685211]	0.0277392	not_corrected
Alg3	asparagine-linked glycosylation 3 (alpha-1,3-mannosyltransferase) [Source:MGI Symbol;Acc:MGI:1098592]	0.028619	0.001		Atp2b4	ATPase, Ca++ transporting, plasma membrane 4 [Source:MGI Symbol;Acc:MGI:88111]	0.0280023	0.01		Ndufaf8	NADH:ubiquinone oxidoreductase complex assembly factor 8 [Source:MGI Symbol;Acc:MGI:1913676]	0.0277392	not_corrected
Fam228b	family with sequence similarity 228, member B [Source:MGI Symbol;Acc:MGI:2442121]	0.028619	0.001		Kcnip1	Kv channel-interacting protein 1 [Source:MGI Symbol;Acc:MGI:1917607]	0.0282666	0.01		Gabrg2	gamma-aminobutyric acid (GABA) A receptor, subunit gamma 2 [Source:MGI Symbol;Acc:MGI:95623]	0.0280036	not_corrected
Nmnat1	nicotinamide nucleotide adenylyltransferase 1 [Source:MGI Symbol;Acc:MGI:1913704]	0.0288833	0.001		Zfp280b	zinc finger protein 280B [Source:MGI Symbol;Acc:MGI:1927865]	0.0282666	0.01		1700037F03Rik	RIKEN cDNA 1700037F03 gene [Source:MGI Symbol;Acc:MGI:1914566]	0.0280036	not_corrected
Rdh5	retinol dehydrogenase 5 [Source:MGI Symbol;Acc:MGI:1201412]	0.0288833	0.001		Safb2	scaffold attachment factor B2 [Source:MGI Symbol;Acc:MGI:2146808]	0.0282666	0.01		Sec14l1	SEC14-like lipid binding 1 [Source:MGI Symbol;Acc:MGI:1921386]	0.0280036	not_corrected
Mib1	MIB E3 ubiquitin protein ligase 1 [Source:MGI Symbol;Acc:MGI:2443157]	0.0288833	0.001		Pax6	paired box 6 [Source:MGI Symbol;Acc:MGI:97490]	0.0285309	0.01		Tmem222	transmembrane protein 222 [Source:MGI Symbol;Acc:MGI:1098568]	0.028268	not_corrected
Chn1os3	chimerin 1, opposite strand 3 [Source:MGI Symbol;Acc:MGI:3705094]	0.0291476	0.001		Zfp433	zinc finger protein 433 [Source:MGI Symbol;Acc:MGI:1920860]	0.0285309	0.01		Leng8	leukocyte receptor cluster (LRC) member 8 [Source:MGI Symbol;Acc:MGI:2142195]	0.028268	not_corrected
Upp1	uridine phosphorylase 1 [Source:MGI Symbol;Acc:MGI:1097668]	0.0291476	0.001		Agap1	ArfGAP with GTPase domain, ankyrin repeat and PH domain 1 [Source:MGI Symbol;Acc:MGI:2653690]	0.0285309	0.01		Slc39a2	solute carrier family 39 (zinc transporter), member 2 [Source:MGI Symbol;Acc:MGI:2684326]	0.0285323	not_corrected
Safb2	scaffold attachment factor B2 [Source:MGI Symbol;Acc:MGI:2146808]	0.0291476	0.001		Lpo	lactoperoxidase [Source:MGI Symbol;Acc:MGI:1923363]	0.0287952	0.01		Rfesd	Rieske (Fe-S) domain containing [Source:MGI Symbol;Acc:MGI:2145198]	0.0285323	not_corrected
4930509H03Rik	RIKEN cDNA 4930509H03 gene [Source:MGI Symbol;Acc:MGI:1922357]	0.0294118	0.001		Ptar1	protein prenyltransferase alpha subunit repeat containing 1 [Source:MGI Symbol;Acc:MGI:1921875]	0.0287952	0.01		Trerf1	transcriptional regulating factor 1 [Source:MGI Symbol;Acc:MGI:2442086]	0.0285323	not_corrected
Mettl26	methyltransferase like 26 [Source:MGI Symbol;Acc:MGI:1915597]	0.0294118	0.001		Stk10	serine/threonine kinase 10 [Source:MGI Symbol;Acc:MGI:1099439]	0.0290594	0.01		Nemp2	nuclear envelope integral membrane protein 2 [Source:MGI Symbol;Acc:MGI:2444113]	0.0287967	not_corrected
Shoc2	Shoc2, leucine rich repeat scaffold protein [Source:MGI Symbol;Acc:MGI:1927197]	0.0294118	0.001		D2hgdh	D-2-hydroxyglutarate dehydrogenase [Source:MGI Symbol;Acc:MGI:2138209]	0.0290594	0.01		Wdr55	WD repeat domain 55 [Source:MGI Symbol;Acc:MGI:1915186]	0.0287967	not_corrected
Gab3	growth factor receptor bound protein 2-associated protein 3 [Source:MGI Symbol;Acc:MGI:2387324]	0.0296761	0.001		Fam13a	family with sequence similarity 13, member A [Source:MGI Symbol;Acc:MGI:1889842]	0.0290594	0.01		Rnf180	ring finger protein 180 [Source:MGI Symbol;Acc:MGI:1919066]	0.0287967	not_corrected
Rhbdf1	rhomboid 5 homolog 1 [Source:MGI Symbol;Acc:MGI:104328]	0.0296761	0.001		Hacd4	3-hydroxyacyl-CoA dehydratase 4 [Source:MGI Symbol;Acc:MGI:1914025]	0.0293237	0.01		Sesn2	sestrin 2 [Source:MGI Symbol;Acc:MGI:2651874]	0.029061	not_corrected
Cipc	CLOCK interacting protein, circadian [Source:MGI Symbol;Acc:MGI:1919185]	0.0296761	0.001		Syde1	synapse defective 1, Rho GTPase, homolog 1 (C. elegans) [Source:MGI Symbol;Acc:MGI:1918959]	0.0293237	0.01		Phactr1	phosphatase and actin regulator 1 [Source:MGI Symbol;Acc:MGI:2659021]	0.029061	not_corrected
Brat1	BRCA1-associated ATM activator 1 [Source:MGI Symbol;Acc:MGI:1891679]	0.0299403	0.001		Il6st	interleukin 6 signal transducer [Source:MGI Symbol;Acc:MGI:96560]	0.0293237	0.01		Pold1	polymerase (DNA directed), delta 1, catalytic subunit [Source:MGI Symbol;Acc:MGI:97741]	0.0293253	not_corrected
Zswim3	zinc finger SWIM-type containing 3 [Source:MGI Symbol;Acc:MGI:1914788]	0.0299403	0.001		Mrps27	mitochondrial ribosomal protein S27 [Source:MGI Symbol;Acc:MGI:1919064]	0.0295879	0.01		Cep76	centrosomal protein 76 [Source:MGI Symbol;Acc:MGI:1923401]	0.0293253	not_corrected
Plekhj1	pleckstrin homology domain containing, family J member 1 [Source:MGI Symbol;Acc:MGI:1925920]	0.0299403	0.001		Tmco4	transmembrane and coiled-coil domains 4 [Source:MGI Symbol;Acc:MGI:1924306]	0.0295879	0.01		Cby1	chibby family member 1, beta catenin antagonist [Source:MGI Symbol;Acc:MGI:1920989]	0.0293253	not_corrected
Ppp1r26	protein phosphatase 1, regulatory subunit 26 [Source:MGI Symbol;Acc:MGI:2685193]	0.0302045	0.001		Srgap2	SLIT-ROBO Rho GTPase activating protein 2 [Source:MGI Symbol;Acc:MGI:109605]	0.0295879	0.01		Atxn7l2	ataxin 7-like 2 [Source:MGI Symbol;Acc:MGI:1919772]	0.0295896	not_corrected
Agmo	alkylglycerol monooxygenase [Source:MGI Symbol;Acc:MGI:2442495]	0.0302045	0.001		B3galt4	UDP-Gal:betaGlcNAc beta 1,3-galactosyltransferase, polypeptide 4 [Source:MGI Symbol;Acc:MGI:1859517]	0.0298522	0.01		Pagr1a	PAXIP1 associated glutamate rich protein 1A [Source:MGI Symbol;Acc:MGI:1914528]	0.0295896	not_corrected
Zc3h7b	zinc finger CCCH type containing 7B [Source:MGI Symbol;Acc:MGI:1328310]	0.0302045	0.001		Dpp8	dipeptidylpeptidase 8 [Source:MGI Symbol;Acc:MGI:1921638]	0.0298522	0.01		Gm42742	predicted gene 42742 [Source:MGI Symbol;Acc:MGI:5662879]	NA	not_corrected
Slc35f1	solute carrier family 35, member F1 [Source:MGI Symbol;Acc:MGI:2139810]	0.0304687	0.001		Hhat	hedgehog acyltransferase [Source:MGI Symbol;Acc:MGI:2444681]	0.0301164	0.01		Zfp219	zinc finger protein 219 [Source:MGI Symbol;Acc:MGI:1917140]	0.0295896	not_corrected
Ptar1	protein prenyltransferase alpha subunit repeat containing 1 [Source:MGI Symbol;Acc:MGI:1921875]	0.0304687	0.001		Nup43	nucleoporin 43 [Source:MGI Symbol;Acc:MGI:1917162]	0.0301164	0.01		AI854703	expressed sequence AI854703 [Source:MGI Symbol;Acc:MGI:2141510]	0.0298539	not_corrected
Syt2	synaptotagmin II [Source:MGI Symbol;Acc:MGI:99666]	0.0307329	0.001		Ak1	adenylate kinase 1 [Source:MGI Symbol;Acc:MGI:87977]	0.0301164	0.01		Fbxo4	F-box protein 4 [Source:MGI Symbol;Acc:MGI:2146220]	0.0298539	not_corrected
Diaph3	diaphanous related formin 3 [Source:MGI Symbol;Acc:MGI:1927222]	0.0307329	0.001		9330162012Rik	cDNA RIKEN 9330162012 gene [Source:MGI Symbol;Acc:MGI:3604449]	0.0303806	0.01		Tardbp	TAR DNA binding protein [Source:MGI Symbol;Acc:MGI:2387629]	0.0298539	not_corrected
Fbxl20	F-box and leucine-rich repeat protein 20 [Source:MGI Symbol;Acc:MGI:1919444]	0.0307329	0.001		Smarcc1	SWI/SNF related, matrix associated, actin dependent regulator of chromatin, subfamily c, member 1 [Source:MGI Symbol;Acc:MGI:1203524]	0.0303806	0.01		Slc25a21	solute carrier family 25 (mitochondrial oxodicarboxylate carrier), member 21 [Source:MGI Symbol;Acc:MGI:2445059]	0.0301182	not_corrected
Rsph3b	radial spoke 3B homolog (Chlamydomonas) [Source:MGI Symbol;Acc:MGI:3630308]	0.0309971	0.001		Hotairm1	Hoxa transcript antisense RNA, myeloid-specific 1 [Source:MGI Symbol;Acc:MGI:3705155]	0.0306448	0.01		Rprd1a	regulation of nuclear pre-mRNA domain containing 1A [Source:MGI Symbol;Acc:MGI:2385066]	0.0301182	not_corrected
Gga2	golgi associated, gamma adaptin ear containing, ARF binding protein 2 [Source:MGI Symbol;Acc:MGI:1921355]	0.0309971	0.001		Polrmt	polymerase (RNA) mitochondrial (DNA directed) [Source:MGI Symbol;Acc:MGI:1915843]	0.0306448	0.01		Rab9b	RAB9B, member RAS oncogene family [Source:MGI Symbol;Acc:MGI:2442454]	0.0303825	not_corrected
Mthfr	methylenetetrahydrofolate reductase [Source:MGI Symbol;Acc:MGI:106639]	0.0312613	0.001		Zc3h7b	zinc finger CCCH type containing 7B [Source:MGI Symbol;Acc:MGI:1328310]	0.0306448	0.01		E230029C05Rik	RIKEN cDNA E230029C05 gene [Source:MGI Symbol;Acc:MGI:2442580]	0.0303825	not_corrected
Mob3c	MOB kinase activator 3C [Source:MGI Symbol;Acc:MGI:2140623]	0.0312613	0.001		Adgrf2	adhesion G protein-coupled receptor F2 [Source:MGI Symbol;Acc:MGI:2182728]	0.030909	0.01		Copg2	coatomer protein complex, subunit gamma 2 [Source:MGI Symbol;Acc:MGI:1858683]	0.0303825	not_corrected
Cpsf7	cleavage and polyadenylation specific factor 7 [Source:MGI Symbol;Acc:MGI:1917826]	0.0312613	0.001		Paqr4	progestin and adipoQ receptor family member IV [Source:MGI Symbol;Acc:MGI:1923748]	0.030909	0.01		Reps2	RALBP1 associated Eps domain containing protein 2 [Source:MGI Symbol;Acc:MGI:2663511]	0.0306467	not_corrected
9330162012Rik	cDNA RIKEN 9330162012 gene [Source:MGI Symbol;Acc:MGI:3604449]	0.0315255	0.001		6330403K07Rik	RIKEN cDNA 6330403K07 gene [Source:MGI Symbol;Acc:MGI:1918001]	0.0311732	0.01		Flywch1	FLYWCH-type zinc finger 1 [Source:MGI Symbol;Acc:MGI:2442638]	0.0306467	not_corrected
Tmem29	transmembrane protein 29 [Source:MGI Symbol;Acc:MGI:1923420]	0.0315255	0.001		P4ha2	procollagen-proline, 2-oxoglutarate 4-dioxygenase (proline 4-hydroxylase), alpha II polypeptide [Source:MGI Symbol;Acc:MGI:894286]	0.0311732	0.01		Pax6	paired box 6 [Source:MGI Symbol;Acc:MGI:97490]	0.030911	not_corrected
Rfx1	regulatory factor X, 1 (influences HLA class II expression) [Source:MGI Symbol;Acc:MGI:105982]	0.0317896	0.001		Snd1	staphylococcal nuclease and tudor domain containing 1 [Source:MGI Symbol;Acc:MGI:1929266]	0.0311732	0.01		Emx2os	Emx2 opposite strand/antisense transcript (non-protein coding) [Source:MGI Symbol;Acc:MGI:3052329]	0.030911	not_corrected
Naglu	alpha-N-acetylglucosaminidase (Sanfilippo disease IIIB) [Source:MGI Symbol;Acc:MGI:1351641]	0.0317896	0.001		Foxp2	forkhead box P2 [Source:MGI Symbol;Acc:MGI:2148705]	0.0314373	0.01		Stx4a	syntaxin 4A (placental) [Source:MGI Symbol;Acc:MGI:893577]	0.030911	not_corrected
Cwc27	CWC27 spliceosome-associated protein [Source:MGI Symbol;Acc:MGI:1914535]	0.0317896	0.001		Pecr	peroxisomal trans-2-enoyl-CoA reductase [Source:MGI Symbol;Acc:MGI:2148199]	0.0314373	0.01		Rph3a	rabphilin 3A [Source:MGI Symbol;Acc:MGI:102788]	0.0311752	not_corrected
Polr3f	polymerase (RNA) III (DNA directed) polypeptide F [Source:MGI Symbol;Acc:MGI:1924086]	0.0320538	0.001		Tdrd3	tudor domain containing 3 [Source:MGI Symbol;Acc:MGI:2444023]	0.0314373	0.01		Zscan20	zinc finger and SCAN domains 20 [Source:MGI Symbol;Acc:MGI:2679268]	0.0311752	not_corrected
Fam193b	family with sequence similarity 193, member B [Source:MGI Symbol;Acc:MGI:2385851]	0.0320538	0.001		Ilk	integrin linked kinase [Source:MGI Symbol;Acc:MGI:1195267]	0.0317015	0.01		Tdrd3	tudor domain containing 3 [Source:MGI Symbol;Acc:MGI:2444023]	0.0311752	not_corrected
Yrdc	yrdC domain containing (E.coli) [Source:MGI Symbol;Acc:MGI:2387201]	0.0323179	0.001		Gsta3	glutathione S-transferase, alpha 3 [Source:MGI Symbol;Acc:MGI:95856]	0.0319656	0.01		Tmem121b	transmembrane protein 121B [Source:MGI Symbol;Acc:MGI:2136977]	0.0314395	not_corrected
P4ha2	procollagen-proline, 2-oxoglutarate 4-dioxygenase (proline 4-hydroxylase), alpha II polypeptide [Source:MGI Symbol;Acc:MGI:894286]	0.0323179	0.001		Sec14l1	SEC14-like lipid binding 1 [Source:MGI Symbol;Acc:MGI:1921386]	0.0319656	0.01		Atp2b4	ATPase, Ca++ transporting, plasma membrane 4 [Source:MGI Symbol;Acc:MGI:88111]	0.0314395	not_corrected
Trim37	tripartite motif-containing 37 [Source:MGI Symbol;Acc:MGI:2153072]	0.0323179	0.001		2810021J22Rik	RIKEN cDNA 2810021J22 gene [Source:MGI Symbol;Acc:MGI:1917194]	0.0322298	0.01		Rab33a	RAB33A, member RAS oncogene family [Source:MGI Symbol;Acc:MGI:109493]	0.0317037	not_corrected
Entpd7	ectonucleoside triphosphate diphosphohydrolase 7 [Source:MGI Symbol;Acc:MGI:2135885]	0.032582	0.001		Fbxl3	F-box and leucine-rich repeat protein 3 [Source:MGI Symbol;Acc:MGI:1354702]	0.0322298	0.01		Rnf125	ring finger protein 125 [Source:MGI Symbol;Acc:MGI:1914914]	0.0317037	not_corrected
Nup43	nucleoporin 43 [Source:MGI Symbol;Acc:MGI:1917162]	0.032582	0.001		Htra3	HtrA serine peptidase 3 [Source:MGI Symbol;Acc:MGI:1925808]	0.0324939	0.01		Dido1	death inducer-obliterator 1 [Source:MGI Symbol;Acc:MGI:1344352]	0.0317037	not_corrected
Trerf1	transcriptional regulating factor 1 [Source:MGI Symbol;Acc:MGI:2442086]	0.032582	0.001		Entrep1	endosomal transmembrane epsin interactor 1 [Source:MGI Symbol;Acc:MGI:2685813]	NA	0.01		Cacna1b	calcium channel, voltage-dependent, N type, alpha 1B subunit [Source:MGI Symbol;Acc:MGI:88296]	0.0319679	not_corrected
Nek8	NIMA (never in mitosis gene a)-related expressed kinase 8 [Source:MGI Symbol;Acc:MGI:1890646]	0.0328461	0.001		Cracr2a	calcium release activated channel regulator 2A [Source:MGI Symbol;Acc:MGI:2685919]	0.032758	0.01		Shld2	shieldin complex subunit 2 [Source:MGI Symbol;Acc:MGI:1922948]	0.0319679	not_corrected
Zswim7	zinc finger SWIM-type containing 7 [Source:MGI Symbol;Acc:MGI:1916997]	0.0328461	0.001		Zbtb48	zinc finger and BTB domain containing 48 [Source:MGI Symbol;Acc:MGI:2140248]	0.032758	0.01		Abca3	ATP-binding cassette, sub-family A (ABC1), member 3 [Source:MGI Symbol;Acc:MGI:1351617]	0.0319679	not_corrected
Hk1	hexokinase 1 [Source:MGI Symbol;Acc:MGI:96103]	0.0328461	0.001		Krcc1	lysine-rich coiled-coil 1 [Source:MGI Symbol;Acc:MGI:1889377]	0.032758	0.01		Tstd3	thiosulfate sulfurtransferase (rhodanese)-like domain containing 3 [Source:MGI Symbol;Acc:MGI:1924282]	0.0322321	not_corrected
Lrfn1	leucine rich repeat and fibronectin type III domain containing 1 [Source:MGI Symbol;Acc:MGI:2136810]	0.0331102	0.001		Fam161a	family with sequence similarity 161, member A [Source:MGI Symbol;Acc:MGI:1921123]	0.0330221	0.01		Cdk16	cyclin-dependent kinase 16 [Source:MGI Symbol;Acc:MGI:97516]	0.0322321	not_corrected
Otud5	OTU domain containing 5 [Source:MGI Symbol;Acc:MGI:1859615]	0.0331102	0.001		Rgs12	regulator of G-protein signaling 12 [Source:MGI Symbol;Acc:MGI:1918979]	0.0330221	0.01		Sh2b2	SH2B adaptor protein 2 [Source:MGI Symbol;Acc:MGI:1345171]	0.0324962	not_corrected
Smpd3	sphingomyelin phosphodiesterase 3, neutral [Source:MGI Symbol;Acc:MGI:1927578]	0.0333743	0.001		Vash1	vasohibin 1 [Source:MGI Symbol;Acc:MGI:2442543]	0.0332862	0.01		Lrrc2	leucine rich repeat containing 2 [Source:MGI Symbol;Acc:MGI:1921499]	0.0324962	not_corrected
1700060O08Rik	RIKEN cDNA 1700060O08 gene [Source:MGI Symbol;Acc:MGI:1914585]	0.0333743	0.001		Pip4p1	phosphatidylinositol-4,5-bisphosphate 4-phosphatase 1 [Source:MGI Symbol;Acc:MGI:2448501]	0.0332862	0.01		Dgcr2	DiGeorge syndrome critical region gene 2 [Source:MGI Symbol;Acc:MGI:892866]	0.0324962	not_corrected
Ddb1	damage specific DNA binding protein 1 [Source:MGI Symbol;Acc:MGI:1202384]	0.0333743	0.001		Prrc2a	proline-rich coiled-coil 2A [Source:MGI Symbol;Acc:MGI:1915467]	0.0332862	0.01		Kcnh5	potassium voltage-gated channel, subfamily H (eag-related), member 5 [Source:MGI Symbol;Acc:MGI:3584508]	0.0327604	not_corrected
Scube1	signal peptide, CUB domain, EGF-like 1 [Source:MGI Symbol;Acc:MGI:1890616]	0.0336384	0.001		Gal3st4	galactose-3-O-sulfotransferase 4 [Source:MGI Symbol;Acc:MGI:1916254]	0.0335502	0.01		Trmt10a	tRNA methyltransferase 10A [Source:MGI Symbol;Acc:MGI:1920421]	0.0330246	not_corrected
Clcc1	chloride channel CLIC-like 1 [Source:MGI Symbol;Acc:MGI:2385186]	0.0336384	0.001		Lamb2	laminin, beta 2 [Source:MGI Symbol;Acc:MGI:99916]	0.0335502	0.01		Lman2	lectin, mannose-binding 2 [Source:MGI Symbol;Acc:MGI:1914140]	0.0330246	not_corrected
Oga	O-GlcNAcase [Source:MGI Symbol;Acc:MGI:1932139]	0.0336384	0.001		Stx2	syntaxin 2 [Source:MGI Symbol;Acc:MGI:108059]	0.0338143	0.01		Mgat4a	mannoside acetylglucosaminyltransferase 4, isoenzyme A [Source:MGI Symbol;Acc:MGI:2662992]	0.0332887	not_corrected
Ezh1	enhancer of zeste 1 polycomb repressive complex 2 subunit [Source:MGI Symbol;Acc:MGI:1097695]	0.0339024	0.001		Cnpy4	canopy FGF signaling regulator 4 [Source:MGI Symbol;Acc:MGI:1913705]	0.0338143	0.01		Wdpcp	WD repeat containing planar cell polarity effector [Source:MGI Symbol;Acc:MGI:2144467]	0.0332887	not_corrected
Eme2	essential meiotic structure-specific endonuclease subunit 2 [Source:MGI Symbol;Acc:MGI:1919889]	0.0339024	0.001		Efcab14	EF-hand calcium binding domain 14 [Source:MGI Symbol;Acc:MGI:2442397]	0.0338143	0.01		Pdzph1	PDZ and pleckstrin homology domains 1 [Source:MGI Symbol;Acc:MGI:1916489]	0.0335528	not_corrected
Ammecr1l	AMME chromosomal region gene 1-like [Source:MGI Symbol;Acc:MGI:2442711]	0.0339024	0.001		Dock11	dedicator of cytokinesis 11 [Source:MGI Symbol;Acc:MGI:1923224]	0.0340784	0.01		Oga	O-GlcNAcase [Source:MGI Symbol;Acc:MGI:1932139]	0.0335528	not_corrected
2900089D17Rik	RIKEN cDNA 2900089D17 gene [Source:MGI Symbol;Acc:MGI:1914527]	0.0341665	0.001		Oga	O-GlcNAcase [Source:MGI Symbol;Acc:MGI:1932139]	0.0340784	0.01		Slc25a34	solute carrier family 25, member 34 [Source:MGI Symbol;Acc:MGI:2686215]	0.0338169	not_corrected
Tubd1	tubulin, delta 1 [Source:MGI Symbol;Acc:MGI:1891826]	0.0341665	0.001		Mtmr11	myotubularin related protein 11 [Source:MGI Symbol;Acc:MGI:2652817]	0.0343424	0.01		Tmsb10	thymosin, beta 10 [Source:MGI Symbol;Acc:MGI:109146]	0.0338169	not_corrected
Sec14l1	SEC14-like lipid binding 1 [Source:MGI Symbol;Acc:MGI:1921386]	0.0341665	0.001		C87436	expressed sequence C87436 [Source:MGI Symbol;Acc:MGI:2141787]	0.0343424	0.01		Gm9844	predicted pseudogene 9844 [Source:MGI Symbol;Acc:MGI:3704288]	NA	not_corrected
Mmachc	methylmalonic aciduria cblC type, with homocystinuria [Source:MGI Symbol;Acc:MGI:1914346]	0.0344305	0.001		Aup1	ancient ubiquitous protein 1 [Source:MGI Symbol;Acc:MGI:107789]	0.0343424	0.01		Ehhadh	enoyl-Coenzyme A, hydratase/3-hydroxyacyl Coenzyme A dehydrogenase [Source:MGI Symbol;Acc:MGI:1277964]	0.034081	not_corrected
Itga7	integrin alpha 7 [Source:MGI Symbol;Acc:MGI:102700]	0.0344305	0.001		Zfp408	zinc finger protein 408 [Source:MGI Symbol;Acc:MGI:2685857]	0.0346064	0.01		Tmco4	transmembrane and coiled-coil domains 4 [Source:MGI Symbol;Acc:MGI:1924306]	0.034081	not_corrected
Lbhd1	LBH domain containing 1 [Source:MGI Symbol;Acc:MGI:5516029]	0.0344305	0.001		Orai3	ORAI calcium release-activated calcium modulator 3 [Source:MGI Symbol;Acc:MGI:3039586]	0.0346064	0.01		Gns	glucosamine (N-acetyl)-6-sulfatase [Source:MGI Symbol;Acc:MGI:1922862]	0.034081	not_corrected
Sgsm3	small G protein signaling modulator 3 [Source:MGI Symbol;Acc:MGI:1916329]	0.0346945	0.001		Slc20a1	solute carrier family 20, member 1 [Source:MGI Symbol;Acc:MGI:108392]	0.0346064	0.01		AV099323	expressed sequence AV099323 [Source:MGI Symbol;Acc:MGI:2139252]	0.0343451	not_corrected
C87436	expressed sequence C87436 [Source:MGI Symbol;Acc:MGI:2141787]	0.0346945	0.001		Fbxw8	F-box and WD-40 domain protein 8 [Source:MGI Symbol;Acc:MGI:1923041]	0.0348704	0.01		Clcc1	chloride channel CLIC-like 1 [Source:MGI Symbol;Acc:MGI:2385186]	0.0343451	not_corrected
Cdk13	cyclin-dependent kinase 13 [Source:MGI Symbol;Acc:MGI:1916812]	0.0346945	0.001		Pla2g6	phospholipase A2, group VI [Source:MGI Symbol;Acc:MGI:1859152]	0.0351344	0.01		Sugct	succinyl-CoA glutarate-CoA transferase [Source:MGI Symbol;Acc:MGI:1923221]	0.0343451	not_corrected
Dnajc2	DnaJ heat shock protein family (Hsp40) member C2 [Source:MGI Symbol;Acc:MGI:99470]	0.0349586	0.001		Med8	mediator complex subunit 8 [Source:MGI Symbol;Acc:MGI:1915269]	0.0351344	0.01		Glra3	glycine receptor, alpha 3 subunit [Source:MGI Symbol;Acc:MGI:95749]	0.0346092	not_corrected
Tmem67	transmembrane protein 67 [Source:MGI Symbol;Acc:MGI:1923928]	0.0349586	0.001		Nras	neuroblastoma ras oncogene [Source:MGI Symbol;Acc:MGI:97376]	0.0351344	0.01		Med8	mediator complex subunit 8 [Source:MGI Symbol;Acc:MGI:1915269]	0.0346092	not_corrected
Med13	mediator complex subunit 13 [Source:MGI Symbol;Acc:MGI:3029632]	0.0349586	0.001		Ndnf	neuron-derived neurotrophic factor [Source:MGI Symbol;Acc:MGI:1915419]	0.0353984	0.01		Gabrb3	gamma-aminobutyric acid (GABA) A receptor, subunit beta 3 [Source:MGI Symbol;Acc:MGI:95621]	0.0346092	not_corrected
Gart	phosphoribosylglycinamide formyltransferase [Source:MGI Symbol;Acc:MGI:95654]	0.0352226	0.001		Rpgrip1	retinitis pigmentosa GTPase regulator interacting protein 1 [Source:MGI Symbol;Acc:MGI:1932134]	0.0353984	0.01		Car10	carbonic anhydrase 10 [Source:MGI Symbol;Acc:MGI:1919855]	0.0348733	not_corrected
D030047H15Rik	RIKEN cDNA D030047H15 gene [Source:MGI Symbol;Acc:MGI:3698136]	0.0352226	0.001		Camsap2	calmodulin regulated spectrin-associated protein family, member 2 [Source:MGI Symbol;Acc:MGI:1922434]	0.0353984	0.01		Ccz1	CCZ1 vacuolar protein trafficking and biogenesis associated [Source:MGI Symbol;Acc:MGI:2141070]	0.0348733	not_corrected
Mtmr3	myotubularin related protein 3 [Source:MGI Symbol;Acc:MGI:1921552]	0.0352226	0.001		Morn2	MORN repeat containing 2 [Source:MGI Symbol;Acc:MGI:2674071]	0.0356624	0.01		Med13	mediator complex subunit 13 [Source:MGI Symbol;Acc:MGI:3029632]	0.0348733	not_corrected
Ccng1	cyclin G1 [Source:MGI Symbol;Acc:MGI:102890]	0.0354865	0.001		Gabrg3	gamma-aminobutyric acid (GABA) A receptor, subunit gamma 3 [Source:MGI Symbol;Acc:MGI:95624]	0.0356624	0.01		Ppfia3	protein tyrosine phosphatase, receptor type, f polypeptide (PTPRF), interacting protein (liprin), alpha 3 [Source:MGI Symbol;Acc:MGI:1924037]	0.0351374	not_corrected
Srd5a3	steroid 5 alpha-reductase 3 [Source:MGI Symbol;Acc:MGI:1930252]	0.0354865	0.001		4930509H03Rik	RIKEN cDNA 4930509H03 gene [Source:MGI Symbol;Acc:MGI:1922357]	0.0359264	0.01		Pomgnt2	protein O-linked mannose beta 1,4-N-acetylglucosaminyltransferase 2 [Source:MGI Symbol;Acc:MGI:2143424]	0.0351374	not_corrected
Sugct	succinyl-CoA glutarate-CoA transferase [Source:MGI Symbol;Acc:MGI:1923221]	0.0354865	0.001		Eme2	essential meiotic structure-specific endonuclease subunit 2 [Source:MGI Symbol;Acc:MGI:1919889]	0.0359264	0.01		Marcksl1	MARCKS-like 1 [Source:MGI Symbol;Acc:MGI:97143]	0.0351374	not_corrected
Rad52	RAD52 homolog, DNA repair protein [Source:MGI Symbol;Acc:MGI:101949]	0.0357505	0.001		Trim37	tripartite motif-containing 37 [Source:MGI Symbol;Acc:MGI:2153072]	0.0359264	0.01		Nipal2	NIPA-like domain containing 2 [Source:MGI Symbol;Acc:MGI:1924488]	0.0354014	not_corrected
Lypla1	lysophospholipase 1 [Source:MGI Symbol;Acc:MGI:1344588]	0.0357505	0.001		Cpne6	copine VI [Source:MGI Symbol;Acc:MGI:1334445]	0.0361903	0.01		Foxk2	forkhead box K2 [Source:MGI Symbol;Acc:MGI:1916087]	0.0354014	not_corrected
Slc14a1	solute carrier family 14 (urea transporter), member 1 [Source:MGI Symbol;Acc:MGI:1351654]	0.0357505	0.001		E230029C05Rik	RIKEN cDNA E230029C05 gene [Source:MGI Symbol;Acc:MGI:2442580]	0.0361903	0.01		Pla2g6	phospholipase A2, group VI [Source:MGI Symbol;Acc:MGI:1859152]	0.0356654	not_corrected
Kctd18	potassium channel tetramerisation domain containing 18 [Source:MGI Symbol;Acc:MGI:3603813]	0.0360145	0.001		Psmd9	proteasome (prosome, macropain) 26S subunit, non-ATPase, 9 [Source:MGI Symbol;Acc:MGI:1914401]	0.0361903	0.01		Zfp563	zinc finger protein 563 [Source:MGI Symbol;Acc:MGI:2677168]	0.0356654	not_corrected
Rft1	RFT1 homolog [Source:MGI Symbol;Acc:MGI:3607791]	0.0360145	0.001		Cacna1h	calcium channel, voltage-dependent, T type, alpha 1H subunit [Source:MGI Symbol;Acc:MGI:1928842]	0.0364543	0.01		Pcnp	PEST proteolytic signal containing nuclear protein [Source:MGI Symbol;Acc:MGI:1923552]	0.0356654	not_corrected
Sfi1	Sfi1 homolog, spindle assembly associated (yeast) [Source:MGI Symbol;Acc:MGI:1926137]	0.0360145	0.001		E130311K13Rik	RIKEN cDNA E130311K13 gene [Source:MGI Symbol;Acc:MGI:3607716]	0.0364543	0.01		Ydjc	YdjC homolog (bacterial) [Source:MGI Symbol;Acc:MGI:1916351]	0.0359295	not_corrected
Maml1	mastermind like transcriptional coactivator 1 [Source:MGI Symbol;Acc:MGI:1890504]	0.0362784	0.001		Cab39	calcium binding protein 39 [Source:MGI Symbol;Acc:MGI:107438]	0.0364543	0.01		Tmem185b	transmembrane protein 185B [Source:MGI Symbol;Acc:MGI:1917634]	0.0359295	not_corrected
Msi1	musashi RNA-binding protein 1 [Source:MGI Symbol;Acc:MGI:107376]	0.0362784	0.001		Gucy1b1	guanylate cyclase 1, soluble, beta 1 [Source:MGI Symbol;Acc:MGI:1860604]	0.0367182	0.01		Zfp516	zinc finger protein 516 [Source:MGI Symbol;Acc:MGI:2443957]	0.0359295	not_corrected
Smcr8	Smith-Magenis syndrome chromosome region, candidate 8 homolog (human) [Source:MGI Symbol;Acc:MGI:2444720]	0.0365424	0.001		Fbn1	fibrillin 1 [Source:MGI Symbol;Acc:MGI:95489]	0.0367182	0.01		Rph3al	rabphilin 3A-like (without C2 domains) [Source:MGI Symbol;Acc:MGI:1923492]	0.0361935	not_corrected
Fam227a	family with sequence similarity 227, member A [Source:MGI Symbol;Acc:MGI:1922979]	0.0365424	0.001		Rhbdl2	rhomboid like 2 [Source:MGI Symbol;Acc:MGI:3608413]	0.0369821	0.01		Pacsin3	protein kinase C and casein kinase substrate in neurons 3 [Source:MGI Symbol;Acc:MGI:1891410]	0.0361935	not_corrected
Ganab	alpha glucosidase 2 alpha neutral subunit [Source:MGI Symbol;Acc:MGI:1097667]	0.0365424	0.001		Gosr1	golgi SNAP receptor complex member 1 [Source:MGI Symbol;Acc:MGI:1858260]	0.0369821	0.01		Ino80d	INO80 complex subunit D [Source:MGI Symbol;Acc:MGI:3027003]	0.0361935	not_corrected
Dchs1	dachsous cadherin related 1 [Source:MGI Symbol;Acc:MGI:2685011]	0.0368063	0.001		Iqsec1	IQ motif and Sec7 domain 1 [Source:MGI Symbol;Acc:MGI:1196356]	0.0369821	0.01		Tceal6	transcription elongation factor A (SII)-like 6 [Source:MGI Symbol;Acc:MGI:1923939]	0.0364575	not_corrected
[truncated: 585 more rows]

## Sheet: AS_Gene_Set_Enrichment_Analysis
significant	p_value	term_size	query_size	intersection_size	precision	recall	term_id	source	term_name	effective_domain_size	source_order	FDR_of_ambient_RNA_removal
[truncated: 998 more rows]

## Sheet: SharedAnchorGenes_Zeisel2018
Name	Score	FDR_of_ambient_RNA_removal		Name	Score	FDR_of_ambient_RNA_removal		Name	Score	ambient_RNA
[truncated: 209 more rows]

[truncated: 3 more sheets: SharedAnchorGenes_Romanov2020, SharedAnchorGenes_Kim2020, SharedAnchorGenes_Hajdarovic22]
