# Supplementary material for: Molecularly stratified hypothalamic astrocytes are cellular foci for obesity
Source: Research Square preprint supplement (doi:10.21203/rs.3.rs-3748581/v1), 2024-02-09
Supplement: Supplementary file 6 [file ae0bd2c8c32380ac66613142.xlsx]

## Sheet: Direct_feature_selection_chi2
gene	description		significant	p_value	term_size	query_size	intersection_size	precision	recall	term_id	source	term_name	effective_domain_size	source_order
0610043K17Rik	RIKEN cDNA 0610043K17 gene [Source:MGI Symbol;Acc:MGI:1915650]		TRUE	0.0130626	12	157	7	0.044586	0.583333	CORUM:538	CORUM	Cytochrome c oxidase, mitochondrial	1082	91
1110019D14Rik	RIKEN cDNA 1110019D14 gene [Source:MGI Symbol;Acc:MGI:1923561]		TRUE	1.74358e-93	2555	1856	469	0.252694	0.183562	GO:0007399	GO:BP	nervous system development	27205	2969
1500004A13Rik	RIKEN cDNA 1500004A13 gene [Source:MGI Symbol;Acc:MGI:2442808]		TRUE	2.24922e-91	4115	1856	623	0.335668	0.151397	GO:0048731	GO:BP	system development	27205	13728
1600010M07Rik	RIKEN cDNA 1600010M07 gene [Source:MGI Symbol;Acc:MGI:1917031]		TRUE	1.39345e-87	6228	1856	803	0.432651	0.128934	GO:0048856	GO:BP	anatomical structure development	27205	13840
1700003M07Rik	RIKEN cDNA 1700003M07 gene [Source:MGI Symbol;Acc:MGI:1919475]		TRUE	3.94042e-85	4873	1856	680	0.366379	0.139544	GO:0007275	GO:BP	multicellular organism development	27205	2871
1700060O08Rik	RIKEN cDNA 1700060O08 gene [Source:MGI Symbol;Acc:MGI:1914585]		TRUE	3.39415e-84	6865	1856	848	0.456897	0.123525	GO:0032502	GO:BP	developmental process	27205	8032
1700081N11Rik	RIKEN cDNA 1700081N11 gene [Source:MGI Symbol;Acc:MGI:1920778]		TRUE	2.69362e-81	1633	1856	343	0.184806	0.210043	GO:0120036	GO:BP	plasma membrane bounded cell projection organization	27205	20549
1700084C06Rik	RIKEN cDNA 1700084C06 gene [Source:MGI Symbol;Acc:MGI:1923868]		TRUE	1.31837e-78	1669	1856	343	0.184806	0.205512	GO:0030030	GO:BP	cell projection organization	27205	7016
1810037I17Rik	RIKEN cDNA 1810037I17 gene [Source:MGI Symbol;Acc:MGI:1914954]		TRUE	6.44007e-73	1871	1856	357	0.192349	0.190807	GO:0022008	GO:BP	neurogenesis	27205	6923
2010001K21Rik	RIKEN cDNA 2010001K21 gene [Source:MGI Symbol;Acc:MGI:1917079]		TRUE	7.22299e-70	1631	1856	324	0.174569	0.198651	GO:0048699	GO:BP	generation of neurons	27205	13696
2210408F21Rik	RIKEN cDNA 2210408F21 gene [Source:MGI Symbol;Acc:MGI:1920902]		TRUE	2.6959e-66	1555	1856	309	0.166487	0.198714	GO:0030182	GO:BP	neuron differentiation	27205	7062
2210408I21Rik	RIKEN cDNA 2210408I21 gene [Source:MGI Symbol;Acc:MGI:1919621]		TRUE	4.96305e-65	12308	1856	1201	0.647091	0.0975788	GO:0050794	GO:BP	regulation of cellular process	27205	14008
2310022B05Rik	RIKEN cDNA 2310022B05 gene [Source:MGI Symbol;Acc:MGI:1916801]		TRUE	9.35625e-64	6732	1856	787	0.42403	0.116904	GO:0048518	GO:BP	positive regulation of biological process	27205	13539
2610008E11Rik	RIKEN cDNA 2610008E11 gene [Source:MGI Symbol;Acc:MGI:1919378]		TRUE	2.04312e-63	5997	1856	726	0.391164	0.121061	GO:0048522	GO:BP	positive regulation of cellular process	27205	13543
2610035D17Rik	RIKEN cDNA 2610035D17 gene [Source:MGI Symbol;Acc:MGI:1919636]		TRUE	3.62715e-61	4715	1856	611	0.329203	0.129586	GO:0030154	GO:BP	cell differentiation	27205	7050
2610307P16Rik	RIKEN cDNA 2610307P16 gene [Source:MGI Symbol;Acc:MGI:1919768]		TRUE	8.3399e-61	4748	1856	613	0.33028	0.129107	GO:0048869	GO:BP	cellular developmental process	27205	13852
2900052L18Rik	RIKEN cDNA 2900052L18 gene [Source:MGI Symbol;Acc:MGI:1924085]		TRUE	1.25612e-60	3570	1856	506	0.272629	0.141737	GO:0023051	GO:BP	regulation of signaling	27205	7001
2900052N01Rik	RIKEN cDNA 2900052N01 gene [Source:MGI Symbol;Acc:MGI:1920290]		TRUE	1.83038e-60	3574	1856	506	0.272629	0.141578	GO:0010646	GO:BP	regulation of cell communication	27205	4388
3110021N24Rik	RIKEN cDNA 3110021N24 gene [Source:MGI Symbol;Acc:MGI:1920383]		TRUE	1.86843e-59	13838	1856	1287	0.693427	0.0930048	GO:0065007	GO:BP	biological regulation	27205	16811
3110039M20Rik	RIKEN cDNA 3110039M20 gene [Source:MGI Symbol;Acc:MGI:1914543]		TRUE	5.13395e-59	2787	1856	427	0.230065	0.153211	GO:0009653	GO:BP	anatomical structure morphogenesis	27205	3648
3110056K07Rik	RIKEN cDNA 3110056K07 gene [Source:MGI Symbol;Acc:MGI:1920454]		TRUE	2.64618e-57	13424	1856	1254	0.675647	0.0934148	GO:0050789	GO:BP	regulation of biological process	27205	14004
3222401L13Rik	RIKEN cDNA 3222401L13 gene [Source:MGI Symbol;Acc:MGI:2444186]		TRUE	5.11532e-56	1110	1856	238	0.128233	0.214414	GO:0031175	GO:BP	neuron projection development	27205	7471
3300002A11Rik	RIKEN cDNA 3300002A11 gene [Source:MGI Symbol;Acc:MGI:1919073]		TRUE	2.36328e-55	1266	1856	256	0.137931	0.202212	GO:0048666	GO:BP	neuron development	27205	13664
4632427E13Rik	RIKEN cDNA 4632427E13 gene [Source:MGI Symbol;Acc:MGI:1915436]		TRUE	4.9007e-55	4975	1856	618	0.332974	0.124221	GO:0048523	GO:BP	negative regulation of cellular process	27205	13544
4732471J01Rik	RIKEN cDNA 4732471J01 gene [Source:MGI Symbol;Acc:MGI:3603586]		TRUE	2.79644e-52	3139	1856	446	0.240302	0.142083	GO:0048468	GO:BP	cell development	27205	13507
4833422C13Rik	RIKEN cDNA 4833422C13 gene [Source:MGI Symbol;Acc:MGI:3603826]		TRUE	1.92438e-51	5491	1856	652	0.351293	0.11874	GO:0051179	GO:BP	localization	27205	14323
4921511C10Rik	RIKEN cDNA 4921511C10 gene [Source:MGI Symbol;Acc:MGI:1918174]		TRUE	8.3267e-50	3244	1856	450	0.242457	0.138718	GO:0065008	GO:BP	regulation of biological quality	27205	16812
4930432B10Rik	RIKEN cDNA 4930432B10 gene [Source:MGI Symbol;Acc:MGI:1921869]		TRUE	3.00077e-47	6000	1856	682	0.367457	0.113667	GO:0048519	GO:BP	negative regulation of biological process	27205	13540
4930445B16Rik	RIKEN cDNA 4930445B16 gene [Source:MGI Symbol;Acc:MGI:1922130]		TRUE	3.48648e-47	2982	1856	419	0.225754	0.14051	GO:0009966	GO:BP	regulation of signal transduction	27205	3882
4930447C04Rik	RIKEN cDNA 4930447C04 gene [Source:MGI Symbol;Acc:MGI:1923051]		TRUE	1.11979e-46	2702	1856	391	0.210668	0.144708	GO:0050793	GO:BP	regulation of developmental process	27205	14007
4930470G03Rik	RIKEN cDNA 4930470G03 gene [Source:MGI Symbol;Acc:MGI:1922171]		TRUE	3.04294e-45	2582	1856	376	0.202586	0.145624	GO:0051128	GO:BP	regulation of cellular component organization	27205	14274
4930473A02Rik	RIKEN cDNA 4930473A02 gene [Source:MGI Symbol;Acc:MGI:2447823]		TRUE	1.10987e-43	1737	1856	287	0.154634	0.165227	GO:0048870	GO:BP	cell motility	27205	13853
4930512B01Rik	RIKEN cDNA 4930512B01 gene [Source:MGI Symbol;Acc:MGI:1921974]		TRUE	2.13976e-43	4056	1856	507	0.273168	0.125	GO:0048583	GO:BP	regulation of response to stimulus	27205	13594
4930517O19Rik	RIKEN cDNA 4930517O19 gene [Source:MGI Symbol;Acc:MGI:1922325]		TRUE	5.23184e-43	4823	1856	572	0.30819	0.118598	GO:0051234	GO:BP	establishment of localization	27205	14353
4930545L23Rik	RIKEN cDNA 4930545L23 gene [Source:MGI Symbol;Acc:MGI:1926055]		TRUE	7.54604e-43	720	1856	167	0.0899784	0.231944	GO:0048858	GO:BP	cell projection morphogenesis	27205	13842
4930549C15Rik	RIKEN cDNA 4930549C15 gene [Source:MGI Symbol;Acc:MGI:1922493]		TRUE	8.69509e-43	3326	1856	440	0.237069	0.132291	GO:0048513	GO:BP	animal organ development	27205	13536
4930570B17Rik	RIKEN cDNA 4930570B17 gene [Source:MGI Symbol;Acc:MGI:1923191]		TRUE	1.00145e-42	1048	1856	208	0.112069	0.198473	GO:0000902	GO:BP	cell morphogenesis	27205	249
4931403E22Rik	RIKEN cDNA 4931403E22 gene [Source:MGI Symbol;Acc:MGI:1918192]		TRUE	1.02143e-42	714	1856	166	0.0894397	0.232493	GO:0120039	GO:BP	plasma membrane bounded cell projection morphogenesis	27205	20550
Bltp1	bridge-like lipid transfer protein family member 1 [Source:MGI Symbol;Acc:MGI:2444631]		TRUE	3.74323e-42	751	1856	170	0.0915948	0.226365	GO:0032990	GO:BP	cell part morphogenesis	27205	8398
4932438H23Rik	RIKEN cDNA 4932438H23 gene [Source:MGI Symbol;Acc:MGI:1921637]		TRUE	4.29894e-42	7634	1856	795	0.428341	0.104139	GO:0016043	GO:BP	cellular component organization	27205	5200
4932443L11Rik	RIKEN cDNA 4932443L11 gene [Source:MGI Symbol;Acc:MGI:1926149]		TRUE	4.58214e-42	699	1856	163	0.0878233	0.23319	GO:0048812	GO:BP	neuron projection morphogenesis	27205	13798
4933431E20Rik	RIKEN cDNA 4933431E20 gene [Source:MGI Symbol;Acc:MGI:3584041]		TRUE	1.99332e-40	4664	1856	551	0.296875	0.118139	GO:0006810	GO:BP	transport	27205	2546
5031425E22Rik	RIKEN cDNA 5031425E22 gene [Source:MGI Symbol;Acc:MGI:1923227]		TRUE	2.68327e-40	1748	1856	281	0.151401	0.160755	GO:0007267	GO:BP	cell-cell signaling	27205	2864
5031439G07Rik	RIKEN cDNA 5031439G07 gene [Source:MGI Symbol;Acc:MGI:2444899]		TRUE	7.39608e-40	3246	1856	425	0.228987	0.13093	GO:0051239	GO:BP	regulation of multicellular organismal process	27205	14358
5330438D12Rik	RIKEN cDNA 5330438D12 gene [Source:MGI Symbol;Acc:MGI:3026931]		TRUE	7.61228e-40	851	1856	179	0.096444	0.210341	GO:0032989	GO:BP	cellular component morphogenesis	27205	8397
5730522E02Rik	RIKEN cDNA 5730522E02 gene [Source:MGI Symbol;Acc:MGI:1917876]		TRUE	4.93166e-39	798	1856	171	0.0921336	0.214286	GO:0034330	GO:BP	cell junction organization	27205	9021
6030443J06Rik	RIKEN cDNA 6030443J06 gene [Source:MGI Symbol;Acc:MGI:2444595]		TRUE	1.06243e-38	3491	1856	444	0.239224	0.127184	GO:0051641	GO:BP	cellular localization	27205	14642
6330403K07Rik	RIKEN cDNA 6330403K07 gene [Source:MGI Symbol;Acc:MGI:1918001]		TRUE	1.13633e-38	7835	1856	799	0.430496	0.101978	GO:0071840	GO:BP	cellular component organization or biogenesis	27205	17895
6430503K07Rik	RIKEN cDNA 6430503K07 gene [Source:MGI Symbol;Acc:MGI:1925318]		TRUE	1.30846e-38	1077	1856	204	0.109914	0.189415	GO:0007417	GO:BP	central nervous system development	27205	2983
6530409C15Rik	RIKEN cDNA 6530409C15 gene [Source:MGI Symbol;Acc:MGI:1923474]		TRUE	5.60633e-38	9152	1856	895	0.48222	0.0977928	GO:0032501	GO:BP	multicellular organismal process	27205	8031
6530411M01Rik	RIKEN cDNA 6530411M01 gene [Source:MGI Symbol;Acc:MGI:1915041]		TRUE	8.18164e-38	1542	1856	254	0.136853	0.164721	GO:0016477	GO:BP	cell migration	27205	5356
6720427I07Rik	RIKEN cDNA 6720427I07 gene [Source:MGI Symbol;Acc:MGI:1924398]		TRUE	6.72893e-37	739	1856	160	0.0862069	0.216509	GO:0120035	GO:BP	regulation of plasma membrane bounded cell projection organization	27205	20548
9330159F19Rik	RIKEN cDNA 9330159F19 gene [Source:MGI Symbol;Acc:MGI:3036239]		TRUE	1.97752e-36	753	1856	161	0.0867457	0.213811	GO:0031344	GO:BP	regulation of cell projection organization	27205	7530
9430041J12Rik	RIKEN cDNA 9430041J12 gene [Source:MGI Symbol;Acc:MGI:1924573]		TRUE	1.17705e-34	643	1856	144	0.0775862	0.22395	GO:0048667	GO:BP	cell morphogenesis involved in neuron differentiation	27205	13665
9530026P05Rik	RIKEN cDNA 9530026P05 gene [Source:MGI Symbol;Acc:MGI:1924659]		TRUE	1.20817e-34	531	1856	129	0.0695043	0.242938	GO:0050808	GO:BP	synapse organization	27205	14020
9630001P10Rik	RIKEN cDNA 9630001P10 gene [Source:MGI Symbol;Acc:MGI:2441755]		TRUE	3.84676e-34	7674	1856	771	0.415409	0.100469	GO:0007154	GO:BP	cell communication	27205	2781
9630014M24Rik	RIKEN cDNA 9630014M24 gene [Source:MGI Symbol;Acc:MGI:3588234]		TRUE	3.93206e-34	760	1856	158	0.0851293	0.207895	GO:0007610	GO:BP	behavior	27205	3139
9630028H03Rik	RIKEN cDNA 9630028H03 gene [Source:MGI Symbol;Acc:MGI:2444526]		TRUE	1.13373e-33	3941	1856	469	0.252694	0.119005	GO:0009893	GO:BP	positive regulation of metabolic process	27205	3831
9930021J03Rik	RIKEN cDNA 9930021J03 gene [Source:MGI Symbol;Acc:MGI:2444398]		TRUE	1.24024e-33	1400	1856	230	0.123922	0.164286	GO:0040011	GO:BP	locomotion	27205	10464
A230057D06Rik	RIKEN cDNA A230057D06 gene [Source:MGI Symbol;Acc:MGI:2442922]		TRUE	2.03435e-33	5933	1856	633	0.341056	0.106691	GO:0080090	GO:BP	regulation of primary metabolic process	27205	18790
A330023F24Rik	RIKEN cDNA A330023F24 gene [Source:MGI Symbol;Acc:MGI:2443958]		TRUE	2.17482e-33	722	1856	152	0.0818966	0.210526	GO:0000904	GO:BP	cell morphogenesis involved in differentiation	27205	250
A330076C08Rik	RIKEN cDNA A330076C08 gene [Source:MGI Symbol;Acc:MGI:2443693]		TRUE	7.14689e-33	7550	1856	757	0.407866	0.100265	GO:0023052	GO:BP	signaling	27205	7002
A330087D11Rik	RIKEN cDNA A330087D11 gene [Source:MGI Symbol;Acc:MGI:3028066]		TRUE	7.34405e-33	2895	1856	374	0.201509	0.129188	GO:0007166	GO:BP	cell surface receptor signaling pathway	27205	2793
A4galt	alpha 1,4-galactosyltransferase [Source:MGI Symbol;Acc:MGI:3512453]		TRUE	1.60055e-32	5510	1856	596	0.321121	0.108167	GO:0031323	GO:BP	regulation of cellular metabolic process	27205	7510
A630089N07Rik	RIKEN cDNA A630089N07 gene [Source:MGI Symbol;Acc:MGI:2444323]		TRUE	2.50081e-32	5742	1856	614	0.330819	0.106931	GO:0051171	GO:BP	regulation of nitrogen compound metabolic process	27205	14316
A730017L22Rik	RIKEN cDNA A730017L22 gene [Source:MGI Symbol;Acc:MGI:3584452]		TRUE	9.28541e-32	2293	1856	315	0.16972	0.137375	GO:0032879	GO:BP	regulation of localization	27205	8303
A730020M07Rik	RIKEN cDNA A730020M07 gene [Source:MGI Symbol;Acc:MGI:2442643]		TRUE	1.40066e-31	2607	1856	344	0.185345	0.131952	GO:0035556	GO:BP	intracellular signal transduction	27205	9589
A830035A12Rik	RIKEN cDNA A830035A12 gene [Source:MGI Symbol;Acc:MGI:3045382]		TRUE	2.08011e-31	10596	1856	975	0.525323	0.0920159	GO:0050896	GO:BP	response to stimulus	27205	14092
A930037H05Rik	RIKEN cDNA A930037H05 gene [Source:MGI Symbol;Acc:MGI:1925689]		TRUE	2.04457e-30	7262	1856	726	0.391164	0.0999725	GO:0019222	GO:BP	regulation of metabolic process	27205	5900
AA465934	expressed sequence AA465934 [Source:MGI Symbol;Acc:MGI:2671018]		TRUE	5.22869e-30	547	1856	124	0.0668103	0.226691	GO:0010975	GO:BP	regulation of neuron projection development	27205	4665
AI480526	expressed sequence AI480526 [Source:MGI Symbol;Acc:MGI:2140910]		TRUE	1.11187e-29	574	1856	127	0.0684267	0.221254	GO:0120031	GO:BP	plasma membrane bounded cell projection assembly	27205	20544
AW047730	expressed sequence AW047730 [Source:MGI Symbol;Acc:MGI:2139951]		TRUE	1.66752e-29	20731	1856	1613	0.869073	0.0778062	GO:0009987	GO:BP	cellular process	27205	3889
AW554918	expressed sequence AW554918 [Source:MGI Symbol;Acc:MGI:2147376]		TRUE	5.33837e-29	1930	1856	273	0.147091	0.141451	GO:0051049	GO:BP	regulation of transport	27205	14219
AY036118	cDNA sequence AY036118 [Source:MGI Symbol;Acc:MGI:2158419]		TRUE	5.68011e-29	583	1856	127	0.0684267	0.217839	GO:0030031	GO:BP	cell projection assembly	27205	7017
Aak1	AP2 associated kinase 1 [Source:MGI Symbol;Acc:MGI:1098687]		TRUE	5.78521e-29	941	1856	170	0.0915948	0.180659	GO:0099536	GO:BP	synaptic signaling	27205	20177
Aatk	apoptosis-associated tyrosine kinase [Source:MGI Symbol;Acc:MGI:1197518]		TRUE	1.0549e-28	1744	1856	254	0.136853	0.145642	GO:0045595	GO:BP	regulation of cell differentiation	27205	12146
Abat	4-aminobutyrate aminotransferase [Source:MGI Symbol;Acc:MGI:2443582]		TRUE	1.20522e-28	1458	1856	225	0.121228	0.154321	GO:0051094	GO:BP	positive regulation of developmental process	27205	14249
Abcb9	ATP-binding cassette, sub-family B (MDR/TAP), member 9 [Source:MGI Symbol;Acc:MGI:1861729]		TRUE	1.42173e-28	2589	1856	334	0.179957	0.129007	GO:0070727	GO:BP	cellular macromolecule localization	27205	17211
Abcc5	ATP-binding cassette, sub-family C (CFTR/MRP), member 5 [Source:MGI Symbol;Acc:MGI:1351644]		TRUE	1.90911e-28	1531	1856	232	0.125	0.151535	GO:2000026	GO:BP	regulation of multicellular organismal development	27205	26633
Abcd2	ATP-binding cassette, sub-family D (ALD), member 2 [Source:MGI Symbol;Acc:MGI:1349467]		TRUE	2.47952e-28	3198	1856	388	0.209052	0.121326	GO:0051173	GO:BP	positive regulation of nitrogen compound metabolic process	27205	14318
Abhd14b	abhydrolase domain containing 14b [Source:MGI Symbol;Acc:MGI:1923741]		TRUE	3.97594e-28	2581	1856	332	0.178879	0.128632	GO:0008104	GO:BP	protein localization	27205	3195
Abhd15	abhydrolase domain containing 15 [Source:MGI Symbol;Acc:MGI:1914727]		TRUE	4.53661e-28	3060	1856	375	0.202047	0.122549	GO:0031325	GO:BP	positive regulation of cellular metabolic process	27205	7512
Abhd18	abhydrolase domain containing 18 [Source:MGI Symbol;Acc:MGI:1915468]		TRUE	8.234e-28	1246	1856	201	0.108297	0.161316	GO:0051130	GO:BP	positive regulation of cellular component organization	27205	14276
Abhd3	abhydrolase domain containing 3 [Source:MGI Symbol;Acc:MGI:2147183]		TRUE	9.96413e-28	797	1856	151	0.0813578	0.18946	GO:0007420	GO:BP	brain development	27205	2986
Abi1	abl interactor 1 [Source:MGI Symbol;Acc:MGI:104913]		TRUE	1.03053e-27	1489	1856	226	0.121767	0.15178	GO:0007010	GO:BP	cytoskeleton organization	27205	2681
Abl1	c-abl oncogene 1, non-receptor tyrosine kinase [Source:MGI Symbol;Acc:MGI:87859]		TRUE	1.13867e-27	3508	1856	413	0.222522	0.117731	GO:0006996	GO:BP	organelle organization	27205	2670
Abl2	v-abl Abelson murine leukemia viral oncogene 2 (arg, Abelson-related gene) [Source:MGI Symbol;Acc:MGI:87860]		TRUE	1.16598e-27	902	1856	163	0.0878233	0.18071	GO:0099537	GO:BP	trans-synaptic signaling	27205	20178
Ablim1	actin-binding LIM protein 1 [Source:MGI Symbol;Acc:MGI:1194500]		TRUE	1.22119e-27	850	1856	157	0.0845905	0.184706	GO:0060322	GO:BP	head development	27205	15367
Abr	active BCR-related gene [Source:MGI Symbol;Acc:MGI:107771]		TRUE	4.70161e-27	8908	1856	836	0.450431	0.0938482	GO:0051716	GO:BP	cellular response to stimulus	27205	14697
Acaca	acetyl-Coenzyme A carboxylase alpha [Source:MGI Symbol;Acc:MGI:108451]		TRUE	8.49983e-27	2590	1856	329	0.177263	0.127027	GO:0065009	GO:BP	regulation of molecular function	27205	16813
Acat3	acetyl-Coenzyme A acetyltransferase 3 [Source:MGI Symbol;Acc:MGI:109182]		TRUE	1.45276e-26	1398	1856	214	0.115302	0.153076	GO:0023057	GO:BP	negative regulation of signaling	27205	7004
Ackr3	atypical chemokine receptor 3 [Source:MGI Symbol;Acc:MGI:109562]		TRUE	1.56033e-26	1030	1856	175	0.0942888	0.169903	GO:2000145	GO:BP	regulation of cell motility	27205	26747
Acot11	acyl-CoA thioesterase 11 [Source:MGI Symbol;Acc:MGI:1913736]		TRUE	1.65234e-26	3080	1856	372	0.200431	0.120779	GO:0033036	GO:BP	macromolecule localization	27205	8425
Acp1	acid phosphatase 1, soluble [Source:MGI Symbol;Acc:MGI:87881]		TRUE	1.96283e-26	3624	1856	419	0.225754	0.115618	GO:0010604	GO:BP	positive regulation of macromolecule metabolic process	27205	4347
Acsbg1	acyl-CoA synthetase bubblegum family member 1 [Source:MGI Symbol;Acc:MGI:2385656]		TRUE	1.96495e-26	1401	1856	214	0.115302	0.152748	GO:0010648	GO:BP	negative regulation of cell communication	27205	4390
Acsl3	acyl-CoA synthetase long-chain family member 3 [Source:MGI Symbol;Acc:MGI:1921455]		TRUE	2.71153e-26	971	1856	168	0.0905172	0.173018	GO:0030334	GO:BP	regulation of cell migration	27205	7143
Acss1	acyl-CoA synthetase short-chain family member 1 [Source:MGI Symbol;Acc:MGI:1915988]		TRUE	4.4024e-26	2813	1856	347	0.186961	0.123356	GO:0006793	GO:BP	phosphorus metabolic process	27205	2534
Acss2	acyl-CoA synthetase short-chain family member 2 [Source:MGI Symbol;Acc:MGI:1890410]		TRUE	9.02937e-26	2790	1856	344	0.185345	0.123297	GO:0006796	GO:BP	phosphate-containing compound metabolic process	27205	2537
Acss3	acyl-CoA synthetase short-chain family member 3 [Source:MGI Symbol;Acc:MGI:2685720]		TRUE	9.45623e-26	1966	1856	268	0.144397	0.136317	GO:0009719	GO:BP	response to endogenous stimulus	27205	3694
Actb	actin, beta [Source:MGI Symbol;Acc:MGI:87904]		TRUE	1.50782e-25	895	1856	158	0.0851293	0.176536	GO:0098916	GO:BP	anterograde trans-synaptic signaling	27205	20010
Actr3b	ARP3 actin-related protein 3B [Source:MGI Symbol;Acc:MGI:2661120]		TRUE	1.50782e-25	895	1856	158	0.0851293	0.176536	GO:0007268	GO:BP	chemical synaptic transmission	27205	2865
Acvr1c	activin A receptor, type IC [Source:MGI Symbol;Acc:MGI:2661081]		TRUE	3.22524e-25	1783	1856	249	0.134159	0.139652	GO:0042592	GO:BP	homeostatic process	27205	10828
Adam11	a disintegrin and metallopeptidase domain 11 [Source:MGI Symbol;Acc:MGI:1098667]		TRUE	4.93211e-25	1078	1856	177	0.0953664	0.164193	GO:0040012	GO:BP	regulation of locomotion	27205	10465
Adam22	a disintegrin and metallopeptidase domain 22 [Source:MGI Symbol;Acc:MGI:1340046]		TRUE	9.24007e-24	6765	1856	662	0.356681	0.0978566	GO:0060255	GO:BP	regulation of macromolecule metabolic process	27205	15305
Adamts12	a disintegrin-like and metallopeptidase (reprolysin type) with thrombospondin type 1 motif, 12 [Source:MGI Symbol;Acc:MGI:2146046]		TRUE	1.32322e-23	481	1856	105	0.0565733	0.218295	GO:0007409	GO:BP	axonogenesis	27205	2976
Adamts2	a disintegrin-like and metallopeptidase (reprolysin type) with thrombospondin type 1 motif, 2 [Source:MGI Symbol;Acc:MGI:1347356]		TRUE	3.04363e-23	929	1856	157	0.0845905	0.168999	GO:0022603	GO:BP	regulation of anatomical structure morphogenesis	27205	6973
Adamts20	a disintegrin-like and metallopeptidase (reprolysin type) with thrombospondin type 1 motif, 20 [Source:MGI Symbol;Acc:MGI:2660628]		TRUE	7.2278e-23	6997	1856	676	0.364224	0.0966128	GO:0007165	GO:BP	signal transduction	27205	2792
Adamts6	a disintegrin-like and metallopeptidase (reprolysin type) with thrombospondin type 1 motif, 6 [Source:MGI Symbol;Acc:MGI:1347348]		TRUE	1.3277e-22	534	1856	110	0.0592672	0.205993	GO:0061564	GO:BP	axon development	27205	16470
Adcy2	adenylate cyclase 2 [Source:MGI Symbol;Acc:MGI:99676]		TRUE	1.36306e-22	6489	1856	636	0.342672	0.098012	GO:1901564	GO:BP	organonitrogen compound metabolic process	27205	22563
Adcy8	adenylate cyclase 8 [Source:MGI Symbol;Acc:MGI:1341110]		TRUE	2.0215e-22	2129	1856	274	0.147629	0.128699	GO:0009891	GO:BP	positive regulation of biosynthetic process	27205	3829
Adcyap1r1	adenylate cyclase activating polypeptide 1 receptor 1 [Source:MGI Symbol;Acc:MGI:108449]		TRUE	2.22847e-22	458	1856	100	0.0538793	0.218341	GO:0034329	GO:BP	cell junction assembly	27205	9020
Adgb	androglobin [Source:MGI Symbol;Acc:MGI:3605549]		TRUE	2.41769e-22	2099	1856	271	0.146013	0.129109	GO:0009888	GO:BP	tissue development	27205	3826
Adgrb1	adhesion G protein-coupled receptor B1 [Source:MGI Symbol;Acc:MGI:1933736]		TRUE	2.86081e-22	1004	1856	163	0.0878233	0.162351	GO:0044087	GO:BP	regulation of cellular component biogenesis	27205	11543
Adgrb2	adhesion G protein-coupled receptor B2 [Source:MGI Symbol;Acc:MGI:2451244]		TRUE	2.98233e-22	698	1856	129	0.0695043	0.184814	GO:0099177	GO:BP	regulation of trans-synaptic signaling	27205	20147
Adgrb3	adhesion G protein-coupled receptor B3 [Source:MGI Symbol;Acc:MGI:2441837]		TRUE	3.04267e-22	1463	1856	210	0.113147	0.143541	GO:0007155	GO:BP	cell adhesion	27205	2782
Adgrg1	adhesion G protein-coupled receptor G1 [Source:MGI Symbol;Acc:MGI:1340051]		TRUE	4.42064e-22	1946	1856	256	0.137931	0.131552	GO:0023056	GO:BP	positive regulation of signaling	27205	7003
Adgrl1	adhesion G protein-coupled receptor L1 [Source:MGI Symbol;Acc:MGI:1929461]		TRUE	5.2676e-22	1664	1856	229	0.123384	0.13762	GO:0048585	GO:BP	negative regulation of response to stimulus	27205	13596
Adgrl2	adhesion G protein-coupled receptor L2 [Source:MGI Symbol;Acc:MGI:2139714]		TRUE	5.99876e-22	1173	1856	180	0.0969828	0.153453	GO:0035295	GO:BP	tube development	27205	9435
Adgrl3	adhesion G protein-coupled receptor L3 [Source:MGI Symbol;Acc:MGI:2441950]		TRUE	7.51409e-22	5960	1856	592	0.318966	0.0993289	GO:0009058	GO:BP	biosynthetic process	27205	3310
Adgrv1	adhesion G protein-coupled receptor V1 [Source:MGI Symbol;Acc:MGI:1274784]		TRUE	8.48576e-22	697	1856	128	0.0689655	0.183644	GO:0050804	GO:BP	modulation of chemical synaptic transmission	27205	14016
Adra1b	adrenergic receptor, alpha 1b [Source:MGI Symbol;Acc:MGI:104774]		TRUE	1.17338e-21	1258	1856	188	0.101293	0.149444	GO:0009968	GO:BP	negative regulation of signal transduction	27205	3884
Adra2a	adrenergic receptor, alpha 2a [Source:MGI Symbol;Acc:MGI:87934]		TRUE	2.39156e-21	1947	1856	254	0.136853	0.130457	GO:0010647	GO:BP	positive regulation of cell communication	27205	4389
Adrb1	adrenergic receptor, beta 1 [Source:MGI Symbol;Acc:MGI:87937]		TRUE	3.52801e-21	1656	1856	226	0.121767	0.136473	GO:0071495	GO:BP	cellular response to endogenous stimulus	27205	17675
Afdn	afadin, adherens junction formation factor [Source:MGI Symbol;Acc:MGI:1314653]		TRUE	3.72979e-21	435	1856	95	0.0511853	0.218391	GO:0031346	GO:BP	positive regulation of cell projection organization	27205	7532
Aff3	AF4/FMR2 family, member 3 [Source:MGI Symbol;Acc:MGI:106927]		TRUE	5.24493e-21	1069	1856	167	0.0899784	0.156221	GO:0051093	GO:BP	negative regulation of developmental process	27205	14248
Afm	afamin [Source:MGI Symbol;Acc:MGI:2429409]		TRUE	6.55988e-21	1100	1856	170	0.0915948	0.154545	GO:0009887	GO:BP	animal organ morphogenesis	27205	3825
Agap1	ArfGAP with GTPase domain, ankyrin repeat and PH domain 1 [Source:MGI Symbol;Acc:MGI:2653690]		TRUE	6.63558e-21	2058	1856	263	0.141703	0.127794	GO:0031328	GO:BP	positive regulation of cellular biosynthetic process	27205	7515
Agbl4	ATP/GTP binding protein-like 4 [Source:MGI Symbol;Acc:MGI:1918244]		TRUE	7.12856e-21	551	1856	109	0.0587284	0.197822	GO:0051960	GO:BP	regulation of nervous system development	27205	14818
Agl	amylo-1,6-glucosidase, 4-alpha-glucanotransferase [Source:MGI Symbol;Acc:MGI:1924809]		TRUE	9.79633e-21	1575	1856	217	0.116918	0.137778	GO:0009967	GO:BP	positive regulation of signal transduction	27205	3883
Agmo	alkylglycerol monooxygenase [Source:MGI Symbol;Acc:MGI:2442495]		TRUE	1.14448e-20	1203	1856	180	0.0969828	0.149626	GO:0072359	GO:BP	circulatory system development	27205	18343
Agt	angiotensinogen (serpin peptidase inhibitor, clade A, member 8) [Source:MGI Symbol;Acc:MGI:87963]		TRUE	1.37636e-20	2090	1856	265	0.14278	0.126794	GO:0045935	GO:BP	positive regulation of nucleobase-containing compound metabolic process	27205	12431
Ahctf1	AT hook containing transcription factor 1 [Source:MGI Symbol;Acc:MGI:1915033]		TRUE	1.40274e-20	1885	1856	246	0.132543	0.130504	GO:0051254	GO:BP	positive regulation of RNA metabolic process	27205	14370
Ahcyl1	S-adenosylhomocysteine hydrolase-like 1 [Source:MGI Symbol;Acc:MGI:2385184]		TRUE	1.61093e-20	1738	1856	232	0.125	0.133487	GO:0045893	GO:BP	positive regulation of DNA-templated transcription	27205	12393
Ahcyl2	S-adenosylhomocysteine hydrolase-like 2 [Source:MGI Symbol;Acc:MGI:1921590]		TRUE	1.61093e-20	1738	1856	232	0.125	0.133487	GO:1903508	GO:BP	positive regulation of nucleic acid-templated transcription	27205	24159
Ahdc1	AT hook, DNA binding motif, containing 1 [Source:MGI Symbol;Acc:MGI:2444218]		TRUE	1.67223e-20	5865	1856	579	0.311961	0.0987212	GO:1901576	GO:BP	organic substance biosynthetic process	27205	22571
Ahi1	Abelson helper integration site 1 [Source:MGI Symbol;Acc:MGI:87971]		TRUE	2.24441e-20	296	1856	75	0.0404095	0.253378	GO:0050803	GO:BP	regulation of synapse structure or activity	27205	14015
Aifm3	apoptosis-inducing factor, mitochondrion-associated 3 [Source:MGI Symbol;Acc:MGI:1919418]		TRUE	2.42035e-20	812	1856	138	0.0743534	0.169951	GO:0030029	GO:BP	actin filament-based process	27205	7015
Ajm1	apical junction component 1 [Source:MGI Symbol;Acc:MGI:2685842]		TRUE	2.77269e-20	1745	1856	232	0.125	0.132951	GO:1902680	GO:BP	positive regulation of RNA biosynthetic process	27205	23482
Ak7	adenylate kinase 7 [Source:MGI Symbol;Acc:MGI:1926051]		TRUE	4.59709e-20	4217	1856	446	0.240302	0.105762	GO:0009889	GO:BP	regulation of biosynthetic process	27205	3827
Ak9	adenylate kinase 9 [Source:MGI Symbol;Acc:MGI:2685080]		TRUE	6.42491e-20	1281	1856	186	0.100216	0.145199	GO:0006811	GO:BP	monoatomic ion transport	27205	2547
Akap10	A kinase (PRKA) anchor protein 10 [Source:MGI Symbol;Acc:MGI:1890218]		TRUE	1.0498e-19	303	1856	75	0.0404095	0.247525	GO:0016358	GO:BP	dendrite development	27205	5346
Akap11	A kinase (PRKA) anchor protein 11 [Source:MGI Symbol;Acc:MGI:2684060]		TRUE	1.07699e-19	955	1856	152	0.0818966	0.159162	GO:0045597	GO:BP	positive regulation of cell differentiation	27205	12148
Akap6	A kinase (PRKA) anchor protein 6 [Source:MGI Symbol;Acc:MGI:3050566]		TRUE	1.07909e-19	1657	1856	222	0.119612	0.133977	GO:1902531	GO:BP	regulation of intracellular signal transduction	27205	23381
Akap9	A kinase (PRKA) anchor protein (yotiao) 9 [Source:MGI Symbol;Acc:MGI:2178217]		TRUE	1.0882e-19	289	1856	73	0.0393319	0.252595	GO:0050807	GO:BP	regulation of synapse organization	27205	14019
Akt3	thymoma viral proto-oncogene 3 [Source:MGI Symbol;Acc:MGI:1345147]		TRUE	1.15682e-19	918	1856	148	0.0797414	0.16122	GO:0060284	GO:BP	regulation of cell development	27205	15333
Alcam	activated leukocyte cell adhesion molecule [Source:MGI Symbol;Acc:MGI:1313266]		TRUE	6.20786e-19	1959	1856	248	0.133621	0.126595	GO:0010557	GO:BP	positive regulation of macromolecule biosynthetic process	27205	4305
Aldh1a1	aldehyde dehydrogenase family 1, subfamily A1 [Source:MGI Symbol;Acc:MGI:1353450]		TRUE	6.87758e-19	4077	1856	430	0.231681	0.10547	GO:0031326	GO:BP	regulation of cellular biosynthetic process	27205	7513
Aldoa	aldolase A, fructose-bisphosphate [Source:MGI Symbol;Acc:MGI:87994]		TRUE	1.54776e-18	479	1856	96	0.0517241	0.200418	GO:0042391	GO:BP	regulation of membrane potential	27205	10714
Aldoa	aldolase A, fructose-bisphosphate [Source:MGI Symbol;Acc:MGI:87994]		TRUE	1.98796e-18	983	1856	152	0.0818966	0.154629	GO:0007167	GO:BP	enzyme-linked receptor protein signaling pathway	27205	2794
Aldoc	aldolase C, fructose-bisphosphate [Source:MGI Symbol;Acc:MGI:101863]		TRUE	2.52149e-18	947	1856	148	0.0797414	0.156283	GO:0007017	GO:BP	microtubule-based process	27205	2684
Alms1	ALMS1, centrosome and basal body associated [Source:MGI Symbol;Acc:MGI:1934606]		TRUE	2.53449e-18	1063	1856	160	0.0862069	0.150517	GO:0006812	GO:BP	monoatomic cation transport	27205	2548
Alpl	alkaline phosphatase, liver/bone/kidney [Source:MGI Symbol;Acc:MGI:87983]		TRUE	2.83318e-18	2506	1856	295	0.158944	0.117717	GO:0051172	GO:BP	negative regulation of nitrogen compound metabolic process	27205	14317
Ambra1	autophagy/beclin 1 regulator 1 [Source:MGI Symbol;Acc:MGI:2443564]		TRUE	3.29711e-18	921	1856	145	0.078125	0.157438	GO:0035239	GO:BP	tube morphogenesis	27205	9403
Amer2	APC membrane recruitment 2 [Source:MGI Symbol;Acc:MGI:1919375]		TRUE	4.59475e-18	1079	1856	161	0.0867457	0.149212	GO:0060341	GO:BP	regulation of cellular localization	27205	15386
Ammecr1	AMMECR nuclear protein 1 [Source:MGI Symbol;Acc:MGI:1860206]		TRUE	5.66246e-18	3610	1856	388	0.209052	0.107479	GO:0036211	GO:BP	protein modification process	27205	10015
Amot	angiomotin [Source:MGI Symbol;Acc:MGI:108440]		TRUE	5.68737e-18	360	1856	80	0.0431034	0.222222	GO:0050890	GO:BP	cognition	27205	14087
Amy1	amylase 1, salivary [Source:MGI Symbol;Acc:MGI:88019]		TRUE	9.1803e-18	5554	1856	543	0.292565	0.0977674	GO:0019538	GO:BP	protein metabolic process	27205	6189
Anapc11	anaphase promoting complex subunit 11 [Source:MGI Symbol;Acc:MGI:1913406]		TRUE	1.05373e-17	990	1856	151	0.0813578	0.152525	GO:0009725	GO:BP	response to hormone	27205	3700
Anapc13	anaphase promoting complex subunit 13 [Source:MGI Symbol;Acc:MGI:1916260]		TRUE	1.5091e-17	3946	1856	414	0.22306	0.104916	GO:0010556	GO:BP	regulation of macromolecule biosynthetic process	27205	4304
Angel1	angel homolog 1 [Source:MGI Symbol;Acc:MGI:1915987]		TRUE	1.54127e-17	579	1856	106	0.0571121	0.183074	GO:1905114	GO:BP	cell surface receptor signaling pathway involved in cell-cell signaling	27205	25551
Ank2	ankyrin 2, brain [Source:MGI Symbol;Acc:MGI:88025]		TRUE	1.78662e-17	2287	1856	273	0.147091	0.11937	GO:0031324	GO:BP	negative regulation of cellular metabolic process	27205	7511
Ank3	ankyrin 3, epithelial [Source:MGI Symbol;Acc:MGI:88026]		TRUE	1.83612e-17	235	1856	62	0.0334052	0.26383	GO:1901888	GO:BP	regulation of cell junction assembly	27205	22843
Ankfn1	ankyrin-repeat and fibronectin type III domain containing 1 [Source:MGI Symbol;Acc:MGI:2686021]		TRUE	1.85284e-17	2378	1856	281	0.151401	0.118167	GO:0048584	GO:BP	positive regulation of response to stimulus	27205	13595
Ankhd1	ankyrin repeat and KH domain containing 1 [Source:MGI Symbol;Acc:MGI:1921733]		TRUE	1.99949e-17	1016	1856	153	0.0824353	0.150591	GO:0034220	GO:BP	monoatomic ion transmembrane transport	27205	8951
Ankrd12	ankyrin repeat domain 12 [Source:MGI Symbol;Acc:MGI:1914357]		TRUE	2.28972e-17	4238	1856	437	0.235453	0.103115	GO:1901362	GO:BP	organic cyclic compound biosynthetic process	27205	22388
Ankrd6	ankyrin repeat domain 6 [Source:MGI Symbol;Acc:MGI:2154278]		TRUE	2.67757e-17	1320	1856	183	0.0985991	0.138636	GO:0045944	GO:BP	positive regulation of transcription by RNA polymerase II	27205	12439
Anks1	ankyrin repeat and SAM domain containing 1 [Source:MGI Symbol;Acc:MGI:2446180]		TRUE	2.95813e-17	1199	1856	171	0.0921336	0.142619	GO:0051241	GO:BP	negative regulation of multicellular organismal process	27205	14360
Anks1b	ankyrin repeat and sterile alpha motif domain containing 1B [Source:MGI Symbol;Acc:MGI:1924781]		TRUE	3.18225e-17	401	1856	84	0.0452586	0.209476	GO:0044782	GO:BP	cilium organization	27205	11840
Ankub1	ankyrin repeat and ubiquitin domain containing 1 [Source:MGI Symbol;Acc:MGI:2685256]		TRUE	3.87507e-17	5474	1856	534	0.287716	0.0975521	GO:0044249	GO:BP	cellular biosynthetic process	27205	11577
Anln	anillin, actin binding protein [Source:MGI Symbol;Acc:MGI:1920174]		TRUE	4.38892e-17	1577	1856	207	0.11153	0.131262	GO:0055085	GO:BP	transmembrane transport	27205	15067
Antxr1	anthrax toxin receptor 1 [Source:MGI Symbol;Acc:MGI:1916788]		TRUE	4.94205e-17	777	1856	127	0.0684267	0.163449	GO:0048589	GO:BP	developmental growth	27205	13600
Aopep	aminopeptidase O [Source:MGI Symbol;Acc:MGI:1919311]		TRUE	6.57586e-17	1852	1856	232	0.125	0.12527	GO:0016310	GO:BP	phosphorylation	27205	5324
Aox1	aldehyde oxidase 1 [Source:MGI Symbol;Acc:MGI:88035]		TRUE	6.69379e-17	970	1856	147	0.0792026	0.151546	GO:0032880	GO:BP	regulation of protein localization	27205	8304
Apba2	amyloid beta (A4) precursor protein-binding, family A, member 2 [Source:MGI Symbol;Acc:MGI:1261791]		TRUE	6.70189e-17	3455	1856	371	0.199892	0.107381	GO:0006355	GO:BP	regulation of DNA-templated transcription	27205	2180
Apbb2	amyloid beta (A4) precursor protein-binding, family B, member 2 [Source:MGI Symbol;Acc:MGI:108405]		TRUE	7.39819e-17	3457	1856	371	0.199892	0.107318	GO:1903506	GO:BP	regulation of nucleic acid-templated transcription	27205	24157
Apc	APC, WNT signaling pathway regulator [Source:MGI Symbol;Acc:MGI:88039]		TRUE	7.96795e-17	1070	1856	157	0.0845905	0.146729	GO:0051050	GO:BP	positive regulation of transport	27205	14220
Apc2	APC regulator of WNT signaling pathway 2 [Source:MGI Symbol;Acc:MGI:1346052]		TRUE	8.41425e-17	4069	1856	421	0.226832	0.103465	GO:0019219	GO:BP	regulation of nucleobase-containing compound metabolic process	27205	5897
Apln	apelin [Source:MGI Symbol;Acc:MGI:1353624]		TRUE	8.55898e-17	3472	1856	372	0.200431	0.107143	GO:2001141	GO:BP	regulation of RNA biosynthetic process	27205	27647
Aplp1	amyloid beta (A4) precursor-like protein 1 [Source:MGI Symbol;Acc:MGI:88046]		TRUE	1.44878e-16	2197	1856	262	0.141164	0.119254	GO:0051649	GO:BP	establishment of localization in cell	27205	14650
Apobec4	apolipoprotein B mRNA editing enzyme, catalytic polypeptide-like 4 (putative) [Source:MGI Symbol;Acc:MGI:1918531]		TRUE	1.75959e-16	444	1856	88	0.0474138	0.198198	GO:0030900	GO:BP	forebrain development	27205	7322
Apoe	apolipoprotein E [Source:MGI Symbol;Acc:MGI:88057]		TRUE	1.76335e-16	1039	1856	153	0.0824353	0.147257	GO:0040007	GO:BP	growth	27205	10460
App	amyloid beta (A4) precursor protein [Source:MGI Symbol;Acc:MGI:88059]		TRUE	1.81759e-16	1900	1856	235	0.126616	0.123684	GO:0051240	GO:BP	positive regulation of multicellular organismal process	27205	14359
Aqp9	aquaporin 9 [Source:MGI Symbol;Acc:MGI:1891066]		TRUE	2.23744e-16	373	1856	79	0.0425647	0.211796	GO:0060271	GO:BP	cilium assembly	27205	15321
Ar	androgen receptor [Source:MGI Symbol;Acc:MGI:88064]		TRUE	2.66903e-16	455	1856	89	0.0479526	0.195604	GO:0050767	GO:BP	regulation of neurogenesis	27205	13987
Arap2	ArfGAP with RhoGAP domain, ankyrin repeat and PH domain 2 [Source:MGI Symbol;Acc:MGI:2684416]		TRUE	2.87816e-16	247	1856	62	0.0334052	0.251012	GO:0099173	GO:BP	postsynapse organization	27205	20143
Arfgef1	ADP-ribosylation factor guanine nucleotide-exchange factor 1(brefeldin A-inhibited) [Source:MGI Symbol;Acc:MGI:2442988]		TRUE	5.6866e-16	3779	1856	394	0.212284	0.10426	GO:0051252	GO:BP	regulation of RNA metabolic process	27205	14368
Arglu1	arginine and glutamate rich 1 [Source:MGI Symbol;Acc:MGI:2442985]		TRUE	6.09369e-16	3805	1856	396	0.213362	0.104074	GO:0043412	GO:BP	macromolecule modification	27205	11269
Arhgap17	Rho GTPase activating protein 17 [Source:MGI Symbol;Acc:MGI:1917747]		TRUE	7.17688e-16	2133	1856	254	0.136853	0.119081	GO:0008283	GO:BP	cell population proliferation	27205	3223
Arhgap21	Rho GTPase activating protein 21 [Source:MGI Symbol;Acc:MGI:1918685]		TRUE	7.86154e-16	2557	1856	291	0.156789	0.113805	GO:0051246	GO:BP	regulation of protein metabolic process	27205	14362
Arhgap23	Rho GTPase activating protein 23 [Source:MGI Symbol;Acc:MGI:3697726]		TRUE	8.15016e-16	210	1856	56	0.0301724	0.266667	GO:0007416	GO:BP	synapse assembly	27205	2982
Arhgap26	Rho GTPase activating protein 26 [Source:MGI Symbol;Acc:MGI:1918552]		TRUE	8.56269e-16	2181	1856	258	0.139009	0.118294	GO:1901700	GO:BP	response to oxygen-containing compound	27205	22661
Arhgap26	Rho GTPase activating protein 26 [Source:MGI Symbol;Acc:MGI:1918552]		TRUE	8.88833e-16	1814	1856	225	0.121228	0.124035	GO:0050790	GO:BP	regulation of catalytic activity	27205	14005
Arhgap31	Rho GTPase activating protein 31 [Source:MGI Symbol;Acc:MGI:1333857]		TRUE	8.91076e-16	2513	1856	287	0.154634	0.114206	GO:0006357	GO:BP	regulation of transcription by RNA polymerase II	27205	2182
Arhgap32	Rho GTPase activating protein 32 [Source:MGI Symbol;Acc:MGI:2450166]		TRUE	9.66102e-16	638	1856	109	0.0587284	0.170846	GO:0007423	GO:BP	sensory organ development	27205	2989
Arhgap35	Rho GTPase activating protein 35 [Source:MGI Symbol;Acc:MGI:1929494]		TRUE	1.33333e-15	4007	1856	411	0.221444	0.102571	GO:0034654	GO:BP	nucleobase-containing compound biosynthetic process	27205	9171
Arhgap5	Rho GTPase activating protein 5 [Source:MGI Symbol;Acc:MGI:1332637]		TRUE	1.4236e-15	1625	1856	207	0.11153	0.127385	GO:0006468	GO:BP	protein phosphorylation	27205	2258
Arhgap6	Rho GTPase activating protein 6 [Source:MGI Symbol;Acc:MGI:1196332]		TRUE	1.83304e-15	726	1856	118	0.0635776	0.162534	GO:0030036	GO:BP	actin cytoskeleton organization	27205	7022
Arhgef10	Rho guanine nucleotide exchange factor (GEF) 10 [Source:MGI Symbol;Acc:MGI:2444453]		TRUE	2.4552e-15	257	1856	62	0.0334052	0.241245	GO:0010001	GO:BP	glial cell differentiation	27205	3901
Arhgef10l	Rho guanine nucleotide exchange factor (GEF) 10-like [Source:MGI Symbol;Acc:MGI:1920004]		TRUE	3.4162e-15	4078	1856	415	0.223599	0.101766	GO:0018130	GO:BP	heterocycle biosynthetic process	27205	5504
Arhgef11	Rho guanine nucleotide exchange factor (GEF) 11 [Source:MGI Symbol;Acc:MGI:2441869]		TRUE	3.82939e-15	3576	1856	374	0.201509	0.104586	GO:0006351	GO:BP	DNA-templated transcription	27205	2176
Arhgef12	Rho guanine nucleotide exchange factor (GEF) 12 [Source:MGI Symbol;Acc:MGI:1916882]		TRUE	4.01018e-15	3577	1856	374	0.201509	0.104557	GO:0097659	GO:BP	nucleic acid-templated transcription	27205	19768
Arhgef18	rho/rac guanine nucleotide exchange factor (GEF) 18 [Source:MGI Symbol;Acc:MGI:2142567]		TRUE	4.42562e-15	1085	1856	154	0.0829741	0.141935	GO:0048878	GO:BP	chemical homeostasis	27205	13859
Arhgef26	Rho guanine nucleotide exchange factor (GEF) 26 [Source:MGI Symbol;Acc:MGI:1918053]		TRUE	5.0433e-15	4087	1856	415	0.223599	0.101541	GO:0019438	GO:BP	aromatic compound biosynthetic process	27205	6097
Arhgef28	Rho guanine nucleotide exchange factor (GEF) 28 [Source:MGI Symbol;Acc:MGI:1346016]		TRUE	6.09538e-15	361	1856	75	0.0404095	0.207756	GO:0042063	GO:BP	gliogenesis	27205	10516
Arhgef4	Rho guanine nucleotide exchange factor (GEF) 4 [Source:MGI Symbol;Acc:MGI:2442507]		TRUE	6.66363e-15	1507	1856	194	0.104526	0.128733	GO:0044093	GO:BP	positive regulation of molecular function	27205	11549
Arhgef9	CDC42 guanine nucleotide exchange factor (GEF) 9 [Source:MGI Symbol;Acc:MGI:2442233]		TRUE	7.31537e-15	1780	1856	219	0.117996	0.123034	GO:0042127	GO:BP	regulation of cell population proliferation	27205	10550
Arid1a	AT rich interactive domain 1A (SWI-like) [Source:MGI Symbol;Acc:MGI:1935147]		TRUE	8.26422e-15	3605	1856	375	0.202047	0.104022	GO:0032774	GO:BP	RNA biosynthetic process	27205	8240
Arl15	ADP-ribosylation factor-like 15 [Source:MGI Symbol;Acc:MGI:2442308]		TRUE	9.13974e-15	2837	1856	311	0.167565	0.109623	GO:0071702	GO:BP	organic substance transport	27205	17820
Armc2	armadillo repeat containing 2 [Source:MGI Symbol;Acc:MGI:1916449]		TRUE	9.32236e-15	2579	1856	289	0.155711	0.112059	GO:0006366	GO:BP	transcription by RNA polymerase II	27205	2189
Armc3	armadillo repeat containing 3 [Source:MGI Symbol;Acc:MGI:1918132]		TRUE	1.00986e-14	2257	1856	261	0.140625	0.11564	GO:0008219	GO:BP	cell death	27205	3218
Armc9	armadillo repeat containing 9 [Source:MGI Symbol;Acc:MGI:1926045]		TRUE	1.01065e-14	723	1856	116	0.0625	0.160443	GO:0071363	GO:BP	cellular response to growth factor stimulus	27205	17561
Arnt2	aryl hydrocarbon receptor nuclear translocator 2 [Source:MGI Symbol;Acc:MGI:107188]		TRUE	1.22051e-14	753	1856	119	0.0641164	0.158035	GO:0070848	GO:BP	response to growth factor	27205	17276
Arntl	aryl hydrocarbon receptor nuclear translocator-like [Source:MGI Symbol;Acc:MGI:1096381]		TRUE	1.25042e-14	431	1856	83	0.0447198	0.192575	GO:0007264	GO:BP	small GTPase mediated signal transduction	27205	2861
Arpp21	cyclic AMP-regulated phosphoprotein, 21 [Source:MGI Symbol;Acc:MGI:107562]		TRUE	1.34783e-14	918	1856	136	0.0732759	0.148148	GO:0098660	GO:BP	inorganic ion transmembrane transport	27205	19866
Arx	aristaless related homeobox [Source:MGI Symbol;Acc:MGI:1097716]		TRUE	1.38364e-14	358	1856	74	0.0398707	0.206704	GO:0051962	GO:BP	positive regulation of nervous system development	27205	14820
Asap1	ArfGAP with SH3 domain, ankyrin repeat and PH domain1 [Source:MGI Symbol;Acc:MGI:1342335]		TRUE	1.41904e-14	1253	1856	169	0.091056	0.134876	GO:0009790	GO:BP	embryo development	27205	3755
Asb14	ankyrin repeat and SOCS box-containing 14 [Source:MGI Symbol;Acc:MGI:2655107]		TRUE	1.48528e-14	841	1856	128	0.0689655	0.1522	GO:0098655	GO:BP	monoatomic cation transmembrane transport	27205	19861
Asic1	acid-sensing (proton-gated) ion channel 1 [Source:MGI Symbol;Acc:MGI:1194915]		TRUE	1.74925e-14	4822	1856	471	0.253772	0.0976773	GO:0009059	GO:BP	macromolecule biosynthetic process	27205	3311
Asic2	acid-sensing (proton-gated) ion channel 2 [Source:MGI Symbol;Acc:MGI:1100867]		TRUE	2.02372e-14	655	1856	108	0.0581897	0.164885	GO:0000226	GO:BP	microtubule cytoskeleton organization	27205	65
Astn1	astrotactin 1 [Source:MGI Symbol;Acc:MGI:1098567]		TRUE	2.46808e-14	611	1856	103	0.0554957	0.168576	GO:0007169	GO:BP	transmembrane receptor protein tyrosine kinase signaling pathway	27205	2796
Astn2	astrotactin 2 [Source:MGI Symbol;Acc:MGI:1889277]		TRUE	2.57814e-14	808	1856	124	0.0668103	0.153465	GO:0098662	GO:BP	inorganic cation transmembrane transport	27205	19868
Atad2b	ATPase family, AAA domain containing 2B [Source:MGI Symbol;Acc:MGI:2444798]		TRUE	2.58253e-14	5397	1856	515	0.277478	0.0954234	GO:0010468	GO:BP	regulation of gene expression	27205	4251
Ate1	arginyltransferase 1 [Source:MGI Symbol;Acc:MGI:1333870]		TRUE	2.79523e-14	916	1856	135	0.0727371	0.14738	GO:0030001	GO:BP	metal ion transport	27205	7008
Atf7	activating transcription factor 7 [Source:MGI Symbol;Acc:MGI:2443472]		TRUE	3.54612e-14	660	1856	108	0.0581897	0.163636	GO:0032870	GO:BP	cellular response to hormone stimulus	27205	8294
Atf7ip	activating transcription factor 7 interacting protein [Source:MGI Symbol;Acc:MGI:1858965]		TRUE	3.91892e-14	256	1856	60	0.0323276	0.234375	GO:0007411	GO:BP	axon guidance	27205	2977
Atl2	atlastin GTPase 2 [Source:MGI Symbol;Acc:MGI:1929492]		TRUE	4.54142e-14	562	1856	97	0.0522629	0.172598	GO:0003013	GO:BP	circulatory system process	27205	1483
Atox1	antioxidant 1 copper chaperone [Source:MGI Symbol;Acc:MGI:1333855]		TRUE	4.77899e-14	257	1856	60	0.0323276	0.233463	GO:0097485	GO:BP	neuron projection guidance	27205	19719
Atp13a4	ATPase type 13A4 [Source:MGI Symbol;Acc:MGI:1924456]		TRUE	6.42383e-14	601	1856	101	0.0544181	0.168053	GO:2000147	GO:BP	positive regulation of cell motility	27205	26749
Atp13a5	ATPase type 13A5 [Source:MGI Symbol;Acc:MGI:2444068]		TRUE	7.2942e-14	3531	1856	365	0.196659	0.10337	GO:0009892	GO:BP	negative regulation of metabolic process	27205	3830
Atp1a2	ATPase, Na+/K+ transporting, alpha 2 polypeptide [Source:MGI Symbol;Acc:MGI:88106]		TRUE	8.05019e-14	531	1856	93	0.0501078	0.175141	GO:0008015	GO:BP	blood circulation	27205	3168
Atp1a3	ATPase, Na+/K+ transporting, alpha 3 polypeptide [Source:MGI Symbol;Acc:MGI:88107]		TRUE	8.17107e-14	649	1856	106	0.0571121	0.163328	GO:0044057	GO:BP	regulation of system process	27205	11519
Atp1b2	ATPase, Na+/K+ transporting, beta 2 polypeptide [Source:MGI Symbol;Acc:MGI:88109]		TRUE	8.21618e-14	2020	1856	237	0.127694	0.117327	GO:0006915	GO:BP	apoptotic process	27205	2620
Atp2a2	ATPase, Ca++ transporting, cardiac muscle, slow twitch 2 [Source:MGI Symbol;Acc:MGI:88110]		TRUE	8.35873e-14	2077	1856	242	0.130388	0.116514	GO:0012501	GO:BP	programmed cell death	27205	4688
Atp2b2	ATPase, Ca++ transporting, plasma membrane 2 [Source:MGI Symbol;Acc:MGI:105368]		TRUE	9.62657e-14	1299	1856	171	0.0921336	0.13164	GO:0060429	GO:BP	epithelium development	27205	15465
Atp5b	ATP synthase, H+ transporting mitochondrial F1 complex, beta subunit [Source:MGI Symbol;Acc:MGI:107801]		TRUE	1.0039e-13	3173	1856	335	0.180496	0.105578	GO:0070887	GO:BP	cellular response to chemical stimulus	27205	17294
Atp5e	ATP synthase, H+ transporting, mitochondrial F1 complex, epsilon subunit [Source:MGI Symbol;Acc:MGI:1855697]		TRUE	1.77208e-13	619	1856	102	0.0549569	0.164782	GO:0040017	GO:BP	positive regulation of locomotion	27205	10470
Atp5g1	ATP synthase, H+ transporting, mitochondrial F0 complex, subunit C1 (subunit 9) [Source:MGI Symbol;Acc:MGI:107653]		TRUE	1.83597e-13	1213	1856	162	0.0872845	0.133553	GO:0048646	GO:BP	anatomical structure formation involved in morphogenesis	27205	13644
Atp5h	ATP synthase, H+ transporting, mitochondrial F0 complex, subunit D [Source:MGI Symbol;Acc:MGI:1918929]		TRUE	1.91376e-13	574	1856	97	0.0522629	0.16899	GO:0030335	GO:BP	positive regulation of cell migration	27205	7144
Atp5j	ATP synthase, H+ transporting, mitochondrial F0 complex, subunit F [Source:MGI Symbol;Acc:MGI:107777]		TRUE	2.02479e-13	375	1856	74	0.0398707	0.197333	GO:0048638	GO:BP	regulation of developmental growth	27205	13636
Atp5j2	ATP synthase, H+ transporting, mitochondrial F0 complex, subunit F2 [Source:MGI Symbol;Acc:MGI:1927558]		TRUE	2.2257e-13	250	1856	58	0.03125	0.232	GO:0007626	GO:BP	locomotory behavior	27205	3155
Atp5k	ATP synthase, H+ transporting, mitochondrial F1F0 complex, subunit E [Source:MGI Symbol;Acc:MGI:106636]		TRUE	2.80702e-13	4843	1856	467	0.251616	0.0964278	GO:0044271	GO:BP	cellular nitrogen compound biosynthetic process	27205	11584
Atp5l	ATP synthase, H+ transporting, mitochondrial F0 complex, subunit G [Source:MGI Symbol;Acc:MGI:1351597]		TRUE	2.82311e-13	180	1856	48	0.0258621	0.266667	GO:0048813	GO:BP	dendrite morphogenesis	27205	13799
Atp5md	ATP synthase membrane subunit DAPIT [Source:MGI Symbol;Acc:MGI:1891435]		TRUE	3.26515e-13	747	1856	115	0.0619612	0.153949	GO:0001568	GO:BP	blood vessel development	27205	367
Atp5o	ATP synthase, H+ transporting, mitochondrial F1 complex, O subunit [Source:MGI Symbol;Acc:MGI:106341]		TRUE	5.23198e-13	979	1856	138	0.0743534	0.14096	GO:0051336	GO:BP	regulation of hydrolase activity	27205	14432
Atp5o	ATP synthase, H+ transporting, mitochondrial F1 complex, O subunit [Source:MGI Symbol;Acc:MGI:106341]		TRUE	5.38451e-13	629	1856	102	0.0549569	0.162162	GO:0006935	GO:BP	chemotaxis	27205	2631
Atp6v0a1	ATPase, H+ transporting, lysosomal V0 subunit A1 [Source:MGI Symbol;Acc:MGI:103286]		TRUE	5.74714e-13	667	1856	106	0.0571121	0.158921	GO:0040008	GO:BP	regulation of growth	27205	10461
Atp6v0b	ATPase, H+ transporting, lysosomal V0 subunit B [Source:MGI Symbol;Acc:MGI:1890510]		TRUE	6.6997e-13	631	1856	102	0.0549569	0.161648	GO:0042330	GO:BP	taxis	27205	10669
Atp6v0c	ATPase, H+ transporting, lysosomal V0 subunit C [Source:MGI Symbol;Acc:MGI:88116]		TRUE	6.90821e-13	434	1856	80	0.0431034	0.184332	GO:0150063	GO:BP	visual system development	27205	21097
Atp6v0e	ATPase, H+ transporting, lysosomal V0 subunit E [Source:MGI Symbol;Acc:MGI:1328318]		TRUE	7.46127e-13	191	1856	49	0.0264009	0.256545	GO:0001764	GO:BP	neuron migration	27205	444
Atp6v1g1	ATPase, H+ transporting, lysosomal V1 subunit G1 [Source:MGI Symbol;Acc:MGI:1913540]		TRUE	7.73108e-13	39	1856	22	0.0118534	0.564103	GO:1990806	GO:BP	ligand-gated ion channel signaling pathway	27205	26543
Atp6v1g2	ATPase, H+ transporting, lysosomal V1 subunit G2 [Source:MGI Symbol;Acc:MGI:1913487]		TRUE	1.12718e-12	779	1856	117	0.0630388	0.150193	GO:0001944	GO:BP	vasculature development	27205	570
Atp8a1	ATPase, aminophospholipid transporter (APLT), class I, type 8A, member 1 [Source:MGI Symbol;Acc:MGI:1330848]		TRUE	1.25838e-12	839	1856	123	0.0662716	0.146603	GO:0048871	GO:BP	multicellular organismal-level homeostasis	27205	13854
Atp9b	ATPase, class II, type 9B [Source:MGI Symbol;Acc:MGI:1354757]		TRUE	1.35559e-12	439	1856	80	0.0431034	0.182232	GO:0048880	GO:BP	sensory system development	27205	13860
Atpif1	ATPase inhibitory factor 1 [Source:MGI Symbol;Acc:MGI:1196457]		TRUE	1.47502e-12	431	1856	79	0.0425647	0.183295	GO:0001654	GO:BP	eye development	27205	382
Atr	ataxia telangiectasia and Rad3 related [Source:MGI Symbol;Acc:MGI:108028]		TRUE	1.68749e-12	432	1856	79	0.0425647	0.18287	GO:0007018	GO:BP	microtubule-based movement	27205	2685
Atraid	all-trans retinoic acid induced differentiation factor [Source:MGI Symbol;Acc:MGI:1918918]		TRUE	1.70647e-12	1589	1856	194	0.104526	0.122089	GO:1901701	GO:BP	cellular response to oxygen-containing compound	27205	22662
Atxn1	ataxin 1 [Source:MGI Symbol;Acc:MGI:104783]		TRUE	1.75964e-12	1086	1856	147	0.0792026	0.135359	GO:0043085	GO:BP	positive regulation of catalytic activity	27205	11100
Atxn2	ataxin 2 [Source:MGI Symbol;Acc:MGI:1277223]		TRUE	2.27756e-12	1386	1856	175	0.0942888	0.126263	GO:0019220	GO:BP	regulation of phosphate metabolic process	27205	5898
Atxn2l	ataxin 2-like [Source:MGI Symbol;Acc:MGI:2446242]		TRUE	2.43862e-12	1387	1856	175	0.0942888	0.126172	GO:0051174	GO:BP	regulation of phosphorus metabolic process	27205	14319
Auts2	autism susceptibility candidate 2 [Source:MGI Symbol;Acc:MGI:1919847]		TRUE	2.48869e-12	807	1856	119	0.0641164	0.14746	GO:0000165	GO:BP	MAPK cascade	27205	59
Avp	arginine vasopressin [Source:MGI Symbol;Acc:MGI:88121]		TRUE	3.09194e-12	580	1856	95	0.0511853	0.163793	GO:0023061	GO:BP	signal release	27205	7007
B130024G19Rik	RIKEN cDNA B130024G19 gene [Source:MGI Symbol;Acc:MGI:3604353]		TRUE	4.32912e-12	923	1856	130	0.0700431	0.140845	GO:0098609	GO:BP	cell-cell adhesion	27205	19855
B230307C23Rik	RIKEN cDNA B230307C23 gene [Source:MGI Symbol;Acc:MGI:3643396]		TRUE	5.53824e-12	796	1856	117	0.0630388	0.146985	GO:0045596	GO:BP	negative regulation of cell differentiation	27205	12147
B230323A14Rik	RIKEN cDNA B230323A14 gene [Source:MGI Symbol;Acc:MGI:2443084]		TRUE	6.10284e-12	531	1856	89	0.0479526	0.167608	GO:0044089	GO:BP	positive regulation of cellular component biogenesis	27205	11545
B2m	beta-2 microglobulin [Source:MGI Symbol;Acc:MGI:88127]		TRUE	6.64339e-12	324	1856	65	0.0350216	0.200617	GO:0007611	GO:BP	learning or memory	27205	3140
B3galt1	UDP-Gal:betaGlcNAc beta 1,3-galactosyltransferase, polypeptide 1 [Source:MGI Symbol;Acc:MGI:1349403]		TRUE	9.43483e-12	351	1856	68	0.0366379	0.193732	GO:0043087	GO:BP	regulation of GTPase activity	27205	11102
B3galt2	UDP-Gal:betaGlcNAc beta 1,3-galactosyltransferase, polypeptide 2 [Source:MGI Symbol;Acc:MGI:1349461]		TRUE	9.47609e-12	294	1856	61	0.0328664	0.207483	GO:0060070	GO:BP	canonical Wnt signaling pathway	27205	15163
BC031181	cDNA sequence BC031181 [Source:MGI Symbol;Acc:MGI:3039614]		TRUE	1.3221e-11	439	1856	78	0.0420259	0.177677	GO:0016055	GO:BP	Wnt signaling pathway	27205	5210
BC034090	cDNA sequence BC034090 [Source:MGI Symbol;Acc:MGI:2672904]		TRUE	1.38755e-11	747	1856	111	0.059806	0.148594	GO:0051129	GO:BP	negative regulation of cellular component organization	27205	14275
BC065397	cDNA sequence BC065397 [Source:MGI Symbol;Acc:MGI:3584520]		TRUE	1.6351e-11	220	1856	51	0.0274784	0.231818	GO:0010976	GO:BP	positive regulation of neuron projection development	27205	4666
Baalc	brain and acute leukemia, cytoplasmic [Source:MGI Symbol;Acc:MGI:1928704]		TRUE	1.70604e-11	441	1856	78	0.0420259	0.176871	GO:0198738	GO:BP	cell-cell signaling by wnt	27205	21224
Bach2	BTB and CNC homology, basic leucine zipper transcription factor 2 [Source:MGI Symbol;Acc:MGI:894679]		TRUE	2.32245e-11	1005	1856	136	0.0732759	0.135323	GO:1902533	GO:BP	positive regulation of intracellular signal transduction	27205	23383
Bahcc1	BAH domain and coiled-coil containing 1 [Source:MGI Symbol;Acc:MGI:2679272]		TRUE	2.58023e-11	1836	1856	212	0.114224	0.115468	GO:0010941	GO:BP	regulation of cell death	27205	4635
Bbof1	basal body orientation factor 1 [Source:MGI Symbol;Acc:MGI:1920123]		TRUE	2.85239e-11	610	1856	96	0.0517241	0.157377	GO:0034762	GO:BP	regulation of transmembrane transport	27205	9198
Bbox1	butyrobetaine (gamma), 2-oxoglutarate dioxygenase 1 (gamma-butyrobetaine hydroxylase) [Source:MGI Symbol;Acc:MGI:1891372]		TRUE	4.07765e-11	1202	1856	154	0.0829741	0.12812	GO:0033043	GO:BP	regulation of organelle organization	27205	8427
Bbs9	Bardet-Biedl syndrome 9 (human) [Source:MGI Symbol;Acc:MGI:2442833]		TRUE	4.2972e-11	789	1856	114	0.0614224	0.144487	GO:0030155	GO:BP	regulation of cell adhesion	27205	7051
Bc1	brain cytoplasmic RNA 1 [Source:MGI Symbol;Acc:MGI:104905]		TRUE	4.49391e-11	643	1856	99	0.0533405	0.153966	GO:0007507	GO:BP	heart development	27205	3064
Bcan	brevican [Source:MGI Symbol;Acc:MGI:1096385]		TRUE	6.26094e-11	724	1856	107	0.0576509	0.14779	GO:0061061	GO:BP	muscle structure development	27205	16048
Bcar3	breast cancer anti-estrogen resistance 3 [Source:MGI Symbol;Acc:MGI:1352501]		TRUE	6.75535e-11	998	1856	134	0.0721983	0.134269	GO:0000122	GO:BP	negative regulation of transcription by RNA polymerase II	27205	51
Bcas3	BCAS3 microtubule associated cell migration factor [Source:MGI Symbol;Acc:MGI:2385848]		TRUE	7.73737e-11	979	1856	132	0.0711207	0.134831	GO:0140352	GO:BP	export from cell	27205	20837
Bckdhb	branched chain ketoacid dehydrogenase E1, beta polypeptide [Source:MGI Symbol;Acc:MGI:88137]		TRUE	8.50635e-11	375	1856	69	0.0371767	0.184	GO:0043010	GO:BP	camera-type eye development	27205	11061
Bcl2	B cell leukemia/lymphoma 2 [Source:MGI Symbol;Acc:MGI:88138]		TRUE	8.73239e-11	308	1856	61	0.0328664	0.198052	GO:0045927	GO:BP	positive regulation of growth	27205	12423
Bcl9	B cell CLL/lymphoma 9 [Source:MGI Symbol;Acc:MGI:1924828]		TRUE	8.73239e-11	308	1856	61	0.0328664	0.198052	GO:0030111	GO:BP	regulation of Wnt signaling pathway	27205	7044
Bicd1	BICD cargo adaptor 1 [Source:MGI Symbol;Acc:MGI:1101760]		TRUE	9.18897e-11	367	1856	68	0.0366379	0.185286	GO:0031589	GO:BP	cell-substrate adhesion	27205	7637
Bicd2	BICD cargo adaptor 2 [Source:MGI Symbol;Acc:MGI:1924145]		TRUE	1.06307e-10	137	1856	38	0.0204741	0.277372	GO:0051963	GO:BP	regulation of synapse assembly	27205	14821
Bicra	BRD4 interacting chromatin remodeling complex associated protein [Source:MGI Symbol;Acc:MGI:2154263]		TRUE	1.45713e-10	27	1856	17	0.00915948	0.62963	GO:0035235	GO:BP	ionotropic glutamate receptor signaling pathway	27205	9401
Bicral	BRD4 interacting chromatin remodeling complex associated protein like [Source:MGI Symbol;Acc:MGI:2673855]		TRUE	1.75096e-10	225	1856	50	0.0269397	0.222222	GO:0010810	GO:BP	regulation of cell-substrate adhesion	27205	4526
Blcap	bladder cancer associated protein [Source:MGI Symbol;Acc:MGI:1858907]		TRUE	1.86854e-10	1712	1856	198	0.106681	0.115654	GO:0045184	GO:BP	establishment of protein localization	27205	12003
Bloc1s1	biogenesis of lysosomal organelles complex-1, subunit 1 [Source:MGI Symbol;Acc:MGI:1195276]		TRUE	2.21356e-10	462	1856	78	0.0420259	0.168831	GO:0007389	GO:BP	pattern specification process	27205	2960
Bmp7	bone morphogenetic protein 7 [Source:MGI Symbol;Acc:MGI:103302]		TRUE	2.32371e-10	242	1856	52	0.0280172	0.214876	GO:0060828	GO:BP	regulation of canonical Wnt signaling pathway	27205	15839
Bmpr1b	bone morphogenetic protein receptor, type 1B [Source:MGI Symbol;Acc:MGI:107191]		TRUE	2.37869e-10	127	1856	36	0.0193966	0.283465	GO:1902414	GO:BP	protein localization to cell junction	27205	23300
Boc	biregional cell adhesion molecule-related/down-regulated by oncogenes (Cdon) binding protein [Source:MGI Symbol;Acc:MGI:2151153]		TRUE	2.52245e-10	2098	1856	231	0.124461	0.110105	GO:0071705	GO:BP	nitrogen compound transport	27205	17823
Bod1l	biorientation of chromosomes in cell division 1-like [Source:MGI Symbol;Acc:MGI:2444804]		TRUE	2.64136e-10	912	1856	124	0.0668103	0.135965	GO:0032940	GO:BP	secretion by cell	27205	8354
Bola3	bolA-like 3 (E. coli) [Source:MGI Symbol;Acc:MGI:1925903]		TRUE	3.27225e-10	3311	1856	331	0.178341	0.0999698	GO:0010605	GO:BP	negative regulation of macromolecule metabolic process	27205	4348
Brd1	bromodomain containing 1 [Source:MGI Symbol;Acc:MGI:1924161]		TRUE	3.27587e-10	3212	1856	323	0.17403	0.10056	GO:0009605	GO:BP	response to external stimulus	27205	3610
Brinp3	bone morphogenetic protein/retinoic acid inducible neural specific 3 [Source:MGI Symbol;Acc:MGI:2443035]		TRUE	3.96771e-10	541	1856	86	0.0463362	0.158965	GO:0016049	GO:BP	cell growth	27205	5204
Brip1os	BRCA1 interacting protein C-terminal helicase 1, opposite strand [Source:MGI Symbol;Acc:MGI:1921288]		TRUE	3.97253e-10	163	1856	41	0.0220905	0.251534	GO:0060078	GO:BP	regulation of postsynaptic membrane potential	27205	15168
Bsg	basigin [Source:MGI Symbol;Acc:MGI:88208]		TRUE	4.21553e-10	207	1856	47	0.0253233	0.227053	GO:0120032	GO:BP	regulation of plasma membrane bounded cell projection assembly	27205	20545
Btaf1	B-TFIID TATA-box binding protein associated factor 1 [Source:MGI Symbol;Acc:MGI:2147538]		TRUE	5.33705e-10	718	1856	104	0.0560345	0.144847	GO:0051668	GO:BP	localization within membrane	27205	14668
Btbd11	BTB (POZ) domain containing 11 [Source:MGI Symbol;Acc:MGI:1921257]		TRUE	5.5143e-10	271	1856	55	0.0296336	0.202952	GO:0048588	GO:BP	developmental cell growth	27205	13599
Btbd17	BTB (POZ) domain containing 17 [Source:MGI Symbol;Acc:MGI:1919264]		TRUE	6.52993e-10	256	1856	53	0.028556	0.207031	GO:0099003	GO:BP	vesicle-mediated transport in synapse	27205	20060
Btbd3	BTB (POZ) domain containing 3 [Source:MGI Symbol;Acc:MGI:2385155]		TRUE	6.63196e-10	305	1856	59	0.0317888	0.193443	GO:0021537	GO:BP	telencephalon development	27205	6470
Btg2	BTG anti-proliferation factor 2 [Source:MGI Symbol;Acc:MGI:108384]		TRUE	6.90466e-10	1747	1856	199	0.10722	0.11391	GO:0009890	GO:BP	negative regulation of biosynthetic process	27205	3828
Btrc	beta-transducin repeat containing protein [Source:MGI Symbol;Acc:MGI:1338871]		TRUE	7.39475e-10	210	1856	47	0.0253233	0.22381	GO:0060491	GO:BP	regulation of cell projection assembly	27205	15523
C030005K06Rik	RIKEN cDNA C030005K06 gene [Source:MGI Symbol;Acc:MGI:1925945]		TRUE	7.53014e-10	614	1856	93	0.0501078	0.151466	GO:0043269	GO:BP	regulation of monoatomic ion transport	27205	11181
C030018K13Rik	RIKEN cDNA C030018K13 gene [Source:MGI Symbol;Acc:MGI:1924632]		TRUE	7.84034e-10	3583	1856	351	0.189116	0.0979626	GO:0010033	GO:BP	response to organic substance	27205	3923
C130071C03Rik	RIKEN cDNA C130071C03 gene [Source:MGI Symbol;Acc:MGI:2443574]		TRUE	8.6116e-10	100	1856	31	0.0167026	0.31	GO:0035082	GO:BP	axoneme assembly	27205	9281
C2	complement component 2 (within H-2S) [Source:MGI Symbol;Acc:MGI:88226]		TRUE	8.66848e-10	234	1856	50	0.0269397	0.213675	GO:0051056	GO:BP	regulation of small GTPase mediated signal transduction	27205	14226
C230072F16Rik	RIKEN cDNA C230072F16 gene [Source:MGI Symbol;Acc:MGI:2444727]		TRUE	1.08148e-09	1405	1856	168	0.0905172	0.119573	GO:1902679	GO:BP	negative regulation of RNA biosynthetic process	27205	23481
C2cd3	C2 calcium-dependent domain containing 3 [Source:MGI Symbol;Acc:MGI:2142166]		TRUE	1.15671e-09	1395	1856	167	0.0899784	0.119713	GO:0045892	GO:BP	negative regulation of DNA-templated transcription	27205	12392
C2cd5	C2 calcium-dependent domain containing 5 [Source:MGI Symbol;Acc:MGI:1921991]		TRUE	1.17385e-09	422	1856	72	0.0387931	0.170616	GO:0032970	GO:BP	regulation of actin filament-based process	27205	8381
C330002G04Rik	RIKEN cDNA C330002G04 gene [Source:MGI Symbol;Acc:MGI:1924860]		TRUE	1.19422e-09	205	1856	46	0.0247845	0.22439	GO:0048639	GO:BP	positive regulation of developmental growth	27205	13637
Cab39l	calcium binding protein 39-like [Source:MGI Symbol;Acc:MGI:1914081]		TRUE	1.22086e-09	236	1856	50	0.0269397	0.211864	GO:0010632	GO:BP	regulation of epithelial cell migration	27205	4374
Cabin1	calcineurin binding protein 1 [Source:MGI Symbol;Acc:MGI:1298375]		TRUE	1.30328e-09	543	1856	85	0.0457974	0.156538	GO:0051345	GO:BP	positive regulation of hydrolase activity	27205	14441
Cables1	CDK5 and Abl enzyme substrate 1 [Source:MGI Symbol;Acc:MGI:1927065]		TRUE	1.30563e-09	1397	1856	167	0.0899784	0.119542	GO:1903507	GO:BP	negative regulation of nucleic acid-templated transcription	27205	24158
Cacna1a	calcium channel, voltage-dependent, P/Q type, alpha 1A subunit [Source:MGI Symbol;Acc:MGI:109482]		TRUE	1.43314e-09	650	1856	96	0.0517241	0.147692	GO:0048514	GO:BP	blood vessel morphogenesis	27205	13537
Cacna1d	calcium channel, voltage-dependent, L type, alpha 1D subunit [Source:MGI Symbol;Acc:MGI:88293]		TRUE	1.65116e-09	1084	1856	138	0.0743534	0.127306	GO:0046903	GO:BP	secretion	27205	13155
Cacna2d2	calcium channel, voltage-dependent, alpha 2/delta subunit 2 [Source:MGI Symbol;Acc:MGI:1929813]		TRUE	1.71168e-09	238	1856	50	0.0269397	0.210084	GO:0045664	GO:BP	regulation of neuron differentiation	27205	12215
Cacna2d3	calcium channel, voltage-dependent, alpha2/delta subunit 3 [Source:MGI Symbol;Acc:MGI:1338890]		TRUE	1.732e-09	254	1856	52	0.0280172	0.204724	GO:0043547	GO:BP	positive regulation of GTPase activity	27205	11354
Cacnb2	calcium channel, voltage-dependent, beta 2 subunit [Source:MGI Symbol;Acc:MGI:894644]		TRUE	1.93308e-09	304	1856	58	0.03125	0.190789	GO:0090596	GO:BP	sensory organ morphogenesis	27205	19390
Cadm1	cell adhesion molecule 1 [Source:MGI Symbol;Acc:MGI:1889272]		TRUE	2.09944e-09	313	1856	59	0.0317888	0.188498	GO:0010631	GO:BP	epithelial cell migration	27205	4373
Cadm2	cell adhesion molecule 2 [Source:MGI Symbol;Acc:MGI:2442722]		TRUE	2.35422e-09	725	1856	103	0.0554957	0.142069	GO:0043408	GO:BP	regulation of MAPK cascade	27205	11266
Calm1	calmodulin 1 [Source:MGI Symbol;Acc:MGI:88251]		TRUE	2.50203e-09	1231	1856	151	0.0813578	0.122665	GO:0042325	GO:BP	regulation of phosphorylation	27205	10666
Calm3	calmodulin 3 [Source:MGI Symbol;Acc:MGI:103249]		TRUE	2.68e-09	647	1856	95	0.0511853	0.146832	GO:0048598	GO:BP	embryonic morphogenesis	27205	13605
Calm2	calmodulin 2 [Source:MGI Symbol;Acc:MGI:103250]		TRUE	2.91086e-09	1682	1856	191	0.102909	0.113555	GO:0031327	GO:BP	negative regulation of cellular biosynthetic process	27205	7514
Caln1	calneuron 1 [Source:MGI Symbol;Acc:MGI:2155987]		TRUE	2.93241e-09	117	1856	33	0.0177802	0.282051	GO:0021782	GO:BP	glial cell development	27205	6710
Calr	calreticulin [Source:MGI Symbol;Acc:MGI:88252]		TRUE	3.09648e-09	1626	1856	186	0.100216	0.114391	GO:0045934	GO:BP	negative regulation of nucleobase-containing compound metabolic process	27205	12430
Camk1d	calcium/calmodulin-dependent protein kinase ID [Source:MGI Symbol;Acc:MGI:2442190]		TRUE	3.19458e-09	316	1856	59	0.0317888	0.186709	GO:0090132	GO:BP	epithelium migration	27205	19055
Camk2a	calcium/calmodulin-dependent protein kinase II alpha [Source:MGI Symbol;Acc:MGI:88256]		TRUE	3.31062e-09	800	1856	110	0.0592672	0.1375	GO:0097435	GO:BP	supramolecular fiber organization	27205	19703
Camk2b	calcium/calmodulin-dependent protein kinase II, beta [Source:MGI Symbol;Acc:MGI:88257]		TRUE	3.63187e-09	300	1856	57	0.0307112	0.19	GO:0050769	GO:BP	positive regulation of neurogenesis	27205	13989
Camk2d	calcium/calmodulin-dependent protein kinase II, delta [Source:MGI Symbol;Acc:MGI:1341265]		TRUE	3.82396e-09	227	1856	48	0.0258621	0.211454	GO:0031503	GO:BP	protein-containing complex localization	27205	7588
Camk2g	calcium/calmodulin-dependent protein kinase II gamma [Source:MGI Symbol;Acc:MGI:88259]		TRUE	3.95017e-09	554	1856	85	0.0457974	0.15343	GO:0098771	GO:BP	inorganic ion homeostasis	27205	19937
Camk2n1	calcium/calmodulin-dependent protein kinase II inhibitor 1 [Source:MGI Symbol;Acc:MGI:1913509]		TRUE	4.46576e-09	132	1856	35	0.0188578	0.265152	GO:0001578	GO:BP	microtubule bundle formation	27205	375
Camkmt	calmodulin-lysine N-methyltransferase [Source:MGI Symbol;Acc:MGI:1920832]		TRUE	4.81556e-09	1657	1856	188	0.101293	0.113458	GO:0016192	GO:BP	vesicle-mediated transport	27205	5292
Cap2	CAP, adenylate cyclase-associated protein, 2 (yeast) [Source:MGI Symbol;Acc:MGI:1914502]		TRUE	4.84485e-09	624	1856	92	0.049569	0.147436	GO:0050801	GO:BP	monoatomic ion homeostasis	27205	14013
Car10	carbonic anhydrase 10 [Source:MGI Symbol;Acc:MGI:1919855]		TRUE	4.92248e-09	175	1856	41	0.0220905	0.234286	GO:0051961	GO:BP	negative regulation of nervous system development	27205	14819
Car8	carbonic anhydrase 8 [Source:MGI Symbol;Acc:MGI:88253]		TRUE	5.06996e-09	269	1856	53	0.028556	0.197026	GO:0060560	GO:BP	developmental growth involved in morphogenesis	27205	15587
Carmil1	capping protein regulator and myosin 1 linker 1 [Source:MGI Symbol;Acc:MGI:1915982]		TRUE	6.12834e-09	1071	1856	135	0.0727371	0.12605	GO:0008284	GO:BP	positive regulation of cell population proliferation	27205	3224
Cask	calcium/calmodulin-dependent serine protein kinase (MAGUK family) [Source:MGI Symbol;Acc:MGI:1309489]		TRUE	6.6197e-09	521	1856	81	0.0436422	0.15547	GO:0010720	GO:BP	positive regulation of cell development	27205	4445
Catsperb	cation channel sperm associated auxiliary subunit beta [Source:MGI Symbol;Acc:MGI:2443988]		TRUE	6.7981e-09	55	1856	22	0.0118534	0.4	GO:0007215	GO:BP	glutamate receptor signaling pathway	27205	2836
Cavin3	caveolae associated 3 [Source:MGI Symbol;Acc:MGI:1923422]		TRUE	7.25449e-09	322	1856	59	0.0317888	0.18323	GO:0090130	GO:BP	tissue migration	27205	19053
Cc2d2a	coiled-coil and C2 domain containing 2A [Source:MGI Symbol;Acc:MGI:1924487]		TRUE	7.36286e-09	223	1856	47	0.0253233	0.210762	GO:0001505	GO:BP	regulation of neurotransmitter levels	27205	335
Ccbe1	collagen and calcium binding EGF domains 1 [Source:MGI Symbol;Acc:MGI:2445053]		TRUE	7.50067e-09	1074	1856	135	0.0727371	0.125698	GO:0051248	GO:BP	negative regulation of protein metabolic process	27205	14364
Ccdc141	coiled-coil domain containing 141 [Source:MGI Symbol;Acc:MGI:1919735]		TRUE	7.73995e-09	639	1856	93	0.0501078	0.14554	GO:0072657	GO:BP	protein localization to membrane	27205	18453
Ccdc146	coiled-coil domain containing 146 [Source:MGI Symbol;Acc:MGI:1922422]		TRUE	7.77726e-09	590	1856	88	0.0474138	0.149153	GO:0060627	GO:BP	regulation of vesicle-mediated transport	27205	15648
Ccdc148	coiled-coil domain containing 148 [Source:MGI Symbol;Acc:MGI:3039583]		TRUE	7.83849e-09	83	1856	27	0.0145474	0.325301	GO:0045665	GO:BP	negative regulation of neuron differentiation	27205	12216
Ccdc152	coiled-coil domain containing 152 [Source:MGI Symbol;Acc:MGI:3641617]		TRUE	7.87768e-09	170	1856	40	0.0215517	0.235294	GO:0050768	GO:BP	negative regulation of neurogenesis	27205	13988
Ccdc153	coiled-coil domain containing 153 [Source:MGI Symbol;Acc:MGI:2448587]		TRUE	8.16779e-09	121	1856	33	0.0177802	0.272727	GO:1901890	GO:BP	positive regulation of cell junction assembly	27205	22845
Ccdc162	coiled-coil domain containing 162 [Source:MGI Symbol;Acc:MGI:1923223]		TRUE	8.97072e-09	854	1856	114	0.0614224	0.133489	GO:0019725	GO:BP	cellular homeostasis	27205	6348
Ccdc170	coiled-coil domain containing 170 [Source:MGI Symbol;Acc:MGI:2685067]		TRUE	1.0127e-08	1511	1856	174	0.09375	0.115156	GO:0051253	GO:BP	negative regulation of RNA metabolic process	27205	14369
Ccdc171	coiled-coil domain containing 171 [Source:MGI Symbol;Acc:MGI:1922152]		TRUE	1.01782e-08	96	1856	29	0.015625	0.302083	GO:0035418	GO:BP	protein localization to synapse	27205	9510
Ccdc180	coiled-coil domain containing 180 [Source:MGI Symbol;Acc:MGI:2685871]		TRUE	1.11481e-08	555	1856	84	0.0452586	0.151351	GO:0051493	GO:BP	regulation of cytoskeleton organization	27205	14528
Ccdc190	coiled-coil domain containing 190 [Source:MGI Symbol;Acc:MGI:1925715]		TRUE	1.12453e-08	150	1856	37	0.0199353	0.246667	GO:1990845	GO:BP	adaptive thermogenesis	27205	26558
Ccdc191	coiled-coil domain containing 191 [Source:MGI Symbol;Acc:MGI:1922661]		TRUE	1.18605e-08	546	1856	83	0.0447198	0.152015	GO:0002009	GO:BP	morphogenesis of an epithelium	27205	628
Ccdc24	coiled-coil domain containing 24 [Source:MGI Symbol;Acc:MGI:2685874]		TRUE	1.35384e-08	1642	1856	185	0.0996767	0.112667	GO:0010558	GO:BP	negative regulation of macromolecule biosynthetic process	27205	4306
Ccdc30	coiled-coil domain containing 30 [Source:MGI Symbol;Acc:MGI:1920582]		TRUE	1.48107e-08	85	1856	27	0.0145474	0.317647	GO:0097120	GO:BP	receptor localization to synapse	27205	19545
Ccdc39	coiled-coil domain containing 39 [Source:MGI Symbol;Acc:MGI:1289263]		TRUE	1.5928e-08	1542	1856	176	0.0948276	0.114137	GO:0031399	GO:BP	regulation of protein modification process	27205	7552
Ccdc60	coiled-coil domain containing 60 [Source:MGI Symbol;Acc:MGI:2141043]		TRUE	1.72108e-08	152	1856	37	0.0199353	0.243421	GO:0007224	GO:BP	smoothened signaling pathway	27205	2844
Ccdc85a	coiled-coil domain containing 85A [Source:MGI Symbol;Acc:MGI:2445069]		TRUE	1.72911e-08	174	1856	40	0.0215517	0.229885	GO:0050770	GO:BP	regulation of axonogenesis	27205	13990
Ccdc88a	coiled coil domain containing 88A [Source:MGI Symbol;Acc:MGI:1925177]		TRUE	1.77766e-08	364	1856	63	0.033944	0.173077	GO:0048545	GO:BP	response to steroid hormone	27205	13564
Ccdc88c	coiled-coil domain containing 88C [Source:MGI Symbol;Acc:MGI:1915589]		TRUE	2.08418e-08	1490	1856	171	0.0921336	0.114765	GO:0051247	GO:BP	positive regulation of protein metabolic process	27205	14363
Ccn1	cellular communication network factor 1 [Source:MGI Symbol;Acc:MGI:88613]		TRUE	2.17571e-08	611	1856	89	0.0479526	0.145663	GO:0055080	GO:BP	monoatomic cation homeostasis	27205	15064
Ccser1	coiled-coil serine rich 1 [Source:MGI Symbol;Acc:MGI:3045354]		TRUE	2.26862e-08	393	1856	66	0.0355603	0.167939	GO:1902903	GO:BP	regulation of supramolecular fiber organization	27205	23660
Cd24a	CD24a antigen [Source:MGI Symbol;Acc:MGI:88323]		TRUE	2.28015e-08	375	1856	64	0.0344828	0.170667	GO:1990778	GO:BP	protein localization to cell periphery	27205	26530
Cd27	CD27 antigen [Source:MGI Symbol;Acc:MGI:88326]		TRUE	2.42965e-08	662	1856	94	0.0506466	0.141994	GO:0048729	GO:BP	tissue morphogenesis	27205	13726
Cd2ap	CD2-associated protein [Source:MGI Symbol;Acc:MGI:1330281]		TRUE	2.4652e-08	1665	1856	186	0.100216	0.111712	GO:0043067	GO:BP	regulation of programmed cell death	27205	11095
Cd38	CD38 antigen [Source:MGI Symbol;Acc:MGI:107474]		TRUE	2.54783e-08	1358	1856	159	0.0856681	0.117084	GO:1901698	GO:BP	response to nitrogen compound	27205	22659
Cd46	CD46 antigen, complement regulatory protein [Source:MGI Symbol;Acc:MGI:1203290]		TRUE	2.59504e-08	487	1856	76	0.0409483	0.156057	GO:0050673	GO:BP	epithelial cell proliferation	27205	13951
Cd47	CD47 antigen (Rh-related antigen, integrin-associated signal transducer) [Source:MGI Symbol;Acc:MGI:96617]		TRUE	2.66784e-08	207	1856	44	0.0237069	0.21256	GO:0099111	GO:BP	microtubule-based transport	27205	20106
Cd63	CD63 antigen [Source:MGI Symbol;Acc:MGI:99529]		TRUE	2.68082e-08	1137	1856	139	0.0748922	0.122252	GO:0033993	GO:BP	response to lipid	27205	8812
Cd81	CD81 antigen [Source:MGI Symbol;Acc:MGI:1096398]		TRUE	2.70973e-08	306	1856	56	0.0301724	0.183007	GO:0010721	GO:BP	negative regulation of cell development	27205	4446
Cd82	CD82 antigen [Source:MGI Symbol;Acc:MGI:104651]		TRUE	2.72e-08	478	1856	75	0.0404095	0.156904	GO:0060537	GO:BP	muscle tissue development	27205	15567
Cd9	CD9 antigen [Source:MGI Symbol;Acc:MGI:88348]		TRUE	2.8213e-08	1633	1856	183	0.0985991	0.112064	GO:0042981	GO:BP	regulation of apoptotic process	27205	11046
Cdc42bpa	CDC42 binding protein kinase alpha [Source:MGI Symbol;Acc:MGI:2441841]		TRUE	3.14276e-08	100	1856	29	0.015625	0.29	GO:0150115	GO:BP	cell-substrate junction organization	27205	21130
Cdc42ep1	CDC42 effector protein (Rho GTPase binding) 1 [Source:MGI Symbol;Acc:MGI:1929763]		TRUE	3.1438e-08	1261	1856	150	0.080819	0.118953	GO:0010243	GO:BP	response to organonitrogen compound	27205	4100
Cdh10	cadherin 10 [Source:MGI Symbol;Acc:MGI:107436]		TRUE	3.15158e-08	240	1856	48	0.0258621	0.2	GO:0007163	GO:BP	establishment or maintenance of cell polarity	27205	2790
Cdh11	cadherin 11 [Source:MGI Symbol;Acc:MGI:99217]		TRUE	3.69557e-08	88	1856	27	0.0145474	0.306818	GO:0048708	GO:BP	astrocyte differentiation	27205	13705
Cdh19	cadherin 19, type 2 [Source:MGI Symbol;Acc:MGI:3588198]		TRUE	3.7986e-08	937	1856	120	0.0646552	0.128068	GO:0070925	GO:BP	organelle assembly	27205	17310
Cdh20	cadherin 20 [Source:MGI Symbol;Acc:MGI:1346069]		TRUE	3.9494e-08	444	1856	71	0.0382543	0.15991	GO:0001667	GO:BP	ameboidal-type cell migration	27205	392
Cdhr3	cadherin-related family member 3 [Source:MGI Symbol;Acc:MGI:1916014]		TRUE	4.2266e-08	454	1856	72	0.0387931	0.15859	GO:0007015	GO:BP	actin filament organization	27205	2683
Cdhr4	cadherin-related family member 4 [Source:MGI Symbol;Acc:MGI:1916648]		TRUE	4.38246e-08	65	1856	23	0.0123922	0.353846	GO:0150116	GO:BP	regulation of cell-substrate junction organization	27205	21131
Cdk12	cyclin-dependent kinase 12 [Source:MGI Symbol;Acc:MGI:1098802]		TRUE	4.38977e-08	135	1856	34	0.018319	0.251852	GO:0120161	GO:BP	regulation of cold-induced thermogenesis	27205	20609
Cdk13	cyclin-dependent kinase 13 [Source:MGI Symbol;Acc:MGI:1916812]		TRUE	4.42812e-08	408	1856	67	0.0360991	0.164216	GO:0050678	GO:BP	regulation of epithelial cell proliferation	27205	13956
Cdk14	cyclin-dependent kinase 14 [Source:MGI Symbol;Acc:MGI:894318]		TRUE	4.83126e-08	418	1856	68	0.0366379	0.162679	GO:0003002	GO:BP	regionalization	27205	1472
Cdk8	cyclin-dependent kinase 8 [Source:MGI Symbol;Acc:MGI:1196224]		TRUE	5.23275e-08	211	1856	44	0.0237069	0.208531	GO:0031345	GO:BP	negative regulation of cell projection organization	27205	7531
Cdkal1	CDK5 regulatory subunit associated protein 1-like 1 [Source:MGI Symbol;Acc:MGI:1921765]		TRUE	5.25833e-08	219	1856	45	0.0242457	0.205479	GO:0003341	GO:BP	cilium movement	27205	1791
Cdkl3	cyclin-dependent kinase-like 3 [Source:MGI Symbol;Acc:MGI:2388268]		TRUE	6.13884e-08	673	1856	94	0.0506466	0.139673	GO:1903530	GO:BP	regulation of secretion by cell	27205	24181
Cdkl4	cyclin-dependent kinase-like 4 [Source:MGI Symbol;Acc:MGI:3587025]		TRUE	6.26332e-08	755	1856	102	0.0549569	0.135099	GO:0055082	GO:BP	intracellular chemical homeostasis	27205	15066
Cdr1os	cerebellar degeneration related antigen 1, opposite strand [Source:MGI Symbol;Acc:MGI:5637821]		TRUE	6.58821e-08	1042	1856	129	0.0695043	0.1238	GO:1901135	GO:BP	carbohydrate derivative metabolic process	27205	22199
Cebpb	CCAAT/enhancer binding protein (C/EBP), beta [Source:MGI Symbol;Acc:MGI:88373]		TRUE	6.70337e-08	2459	1856	251	0.135237	0.102074	GO:0071310	GO:BP	cellular response to organic substance	27205	17511
Cecr2	CECR2, histone acetyl-lysine reader [Source:MGI Symbol;Acc:MGI:1923799]		TRUE	6.74132e-08	287	1856	53	0.028556	0.184669	GO:0022604	GO:BP	regulation of cell morphogenesis	27205	6974
Celf2	CUGBP, Elav-like family member 2 [Source:MGI Symbol;Acc:MGI:1338822]		TRUE	6.80719e-08	137	1856	34	0.018319	0.248175	GO:0106106	GO:BP	cold-induced thermogenesis	27205	20321
Celf4	CUGBP, Elav-like family member 4 [Source:MGI Symbol;Acc:MGI:1932407]		TRUE	6.93232e-08	4067	1856	379	0.204203	0.0931891	GO:0022607	GO:BP	cellular component assembly	27205	6977
Celrr	cerebellum expressed regulatory RNA [Source:MGI Symbol;Acc:MGI:2685664]		TRUE	7.21408e-08	331	1856	58	0.03125	0.175227	GO:0030100	GO:BP	regulation of endocytosis	27205	7041
Cep112	centrosomal protein 112 [Source:MGI Symbol;Acc:MGI:1923673]		TRUE	7.68739e-08	182	1856	40	0.0215517	0.21978	GO:0001659	GO:BP	temperature homeostasis	27205	387
Cep126	centrosomal protein 126 [Source:MGI Symbol;Acc:MGI:2680221]		TRUE	8.55225e-08	124	1856	32	0.0172414	0.258065	GO:0060996	GO:BP	dendritic spine development	27205	15991
Cep128	centrosomal protein 128 [Source:MGI Symbol;Acc:MGI:1922466]		TRUE	8.64468e-08	1597	1856	178	0.0959052	0.111459	GO:0015031	GO:BP	protein transport	27205	4917
Cep350	centrosomal protein 350 [Source:MGI Symbol;Acc:MGI:1921331]		TRUE	1.0458e-07	1159	1856	139	0.0748922	0.119931	GO:0014070	GO:BP	response to organic cyclic compound	27205	4755
Cep85l	centrosomal protein 85-like [Source:MGI Symbol;Acc:MGI:3642684]		TRUE	1.17159e-07	200	1856	42	0.0226293	0.21	GO:0021953	GO:BP	central nervous system neuron differentiation	27205	6868
Cfap100	cilia and flagella associated protein 100 [Source:MGI Symbol;Acc:MGI:2141635]		TRUE	1.19978e-07	1329	1856	154	0.0829741	0.115877	GO:0009628	GO:BP	response to abiotic stimulus	27205	3626
Cfap161	cilia and flagella associated protein 161 [Source:MGI Symbol;Acc:MGI:1922806]		TRUE	1.28542e-07	1218	1856	144	0.0775862	0.118227	GO:0018193	GO:BP	peptidyl-amino acid modification	27205	5557
Cfap206	cilia and flagella associated protein 206 [Source:MGI Symbol;Acc:MGI:1916579]		TRUE	1.39703e-07	155	1856	36	0.0193966	0.232258	GO:0007269	GO:BP	neurotransmitter secretion	27205	2866
Cfap299	cilia and flagella associated protein 299 [Source:MGI Symbol;Acc:MGI:1916571]		TRUE	1.39703e-07	155	1856	36	0.0193966	0.232258	GO:0099643	GO:BP	signal release from synapse	27205	20245
Cfap43	cilia and flagella associated protein 43 [Source:MGI Symbol;Acc:MGI:1289258]		TRUE	1.42641e-07	553	1856	81	0.0436422	0.146474	GO:0001525	GO:BP	angiogenesis	27205	344
Cfap44	cilia and flagella associated protein 44 [Source:MGI Symbol;Acc:MGI:1277238]		TRUE	1.42861e-07	978	1856	122	0.0657328	0.124744	GO:0033365	GO:BP	protein localization to organelle	27205	8610
Cfap46	cilia and flagella associated protein 46 [Source:MGI Symbol;Acc:MGI:2444387]		TRUE	1.50934e-07	438	1856	69	0.0371767	0.157534	GO:0010959	GO:BP	regulation of metal ion transport	27205	4650
Cfap52	cilia and flagella associated protein 52 [Source:MGI Symbol;Acc:MGI:1919110]		TRUE	1.62256e-07	218	1856	44	0.0237069	0.201835	GO:0099504	GO:BP	synaptic vesicle cycle	27205	20162
Cfap54	cilia and flagella associated protein 54 [Source:MGI Symbol;Acc:MGI:1922208]		TRUE	1.63507e-07	841	1856	109	0.0587284	0.129608	GO:0006897	GO:BP	endocytosis	27205	2607
Cfap61	cilia and flagella associated protein 61 [Source:MGI Symbol;Acc:MGI:1926024]		TRUE	1.63818e-07	210	1856	43	0.0231681	0.204762	GO:0006836	GO:BP	neurotransmitter transport	27205	2562
Cfap65	cilia and flagella associated protein 65 [Source:MGI Symbol;Acc:MGI:2444274]		TRUE	1.67154e-07	374	1856	62	0.0334052	0.165775	GO:0032956	GO:BP	regulation of actin cytoskeleton organization	27205	8368
Cfap69	cilia and flagella associated protein 69 [Source:MGI Symbol;Acc:MGI:2443778]		TRUE	1.68963e-07	768	1856	102	0.0549569	0.132812	GO:0051046	GO:BP	regulation of secretion	27205	14216
Cfap70	cilia and flagella associated protein 70 [Source:MGI Symbol;Acc:MGI:1923920]		TRUE	2.0758e-07	2015	1856	212	0.114224	0.105211	GO:0033554	GO:BP	cellular response to stress	27205	8724
Cfap74	cilia and flagella associated protein 74 [Source:MGI Symbol;Acc:MGI:1917130]		TRUE	2.08307e-07	313	1856	55	0.0296336	0.175719	GO:0090287	GO:BP	regulation of cellular response to growth factor stimulus	27205	19192
Cfap77	cilia and flagella associated protein 77 [Source:MGI Symbol;Acc:MGI:2685669]		TRUE	2.10548e-07	121	1856	31	0.0167026	0.256198	GO:0048709	GO:BP	oligodendrocyte differentiation	27205	13706
Cfap97d2	CFAP97 domain containing 2 [Source:MGI Symbol;Acc:MGI:2685952]		TRUE	2.10999e-07	1193	1856	141	0.0759698	0.118189	GO:0060548	GO:BP	negative regulation of cell death	27205	15578
Cfap99	cilia and flagella associated protein 99 [Source:MGI Symbol;Acc:MGI:5434801]		TRUE	2.24293e-07	423	1856	67	0.0360991	0.158392	GO:0042886	GO:BP	amide transport	27205	11011
Cfl1	cofilin 1, non-muscle [Source:MGI Symbol;Acc:MGI:101757]		TRUE	2.35825e-07	964	1856	120	0.0646552	0.124481	GO:0019637	GO:BP	organophosphate metabolic process	27205	6280
Chchd10	coiled-coil-helix-coiled-coil-helix domain containing 10 [Source:MGI Symbol;Acc:MGI:2143558]		TRUE	2.7019e-07	511	1856	76	0.0409483	0.148728	GO:1903829	GO:BP	positive regulation of protein localization	27205	24440
Chd2	chromodomain helicase DNA binding protein 2 [Source:MGI Symbol;Acc:MGI:2448567]		TRUE	2.98969e-07	370	1856	61	0.0328664	0.164865	GO:0048167	GO:BP	regulation of synaptic plasticity	27205	13297
Chd3	chromodomain helicase DNA binding protein 3 [Source:MGI Symbol;Acc:MGI:1344395]		TRUE	3.01573e-07	159	1856	36	0.0193966	0.226415	GO:0010977	GO:BP	negative regulation of neuron projection development	27205	4667
Chd6	chromodomain helicase DNA binding protein 6 [Source:MGI Symbol;Acc:MGI:1918639]		TRUE	3.72035e-07	300	1856	53	0.028556	0.176667	GO:0030336	GO:BP	negative regulation of cell migration	27205	7145
Chd7	chromodomain helicase DNA binding protein 7 [Source:MGI Symbol;Acc:MGI:2444748]		TRUE	4.01072e-07	1126	1856	134	0.0721983	0.119005	GO:0001932	GO:BP	regulation of protein phosphorylation	27205	561
Chil1	chitinase-like 1 [Source:MGI Symbol;Acc:MGI:1340899]		TRUE	4.22102e-07	301	1856	53	0.028556	0.17608	GO:0032409	GO:BP	regulation of transporter activity	27205	7967
Chl1	cell adhesion molecule L1-like [Source:MGI Symbol;Acc:MGI:1098266]		TRUE	4.25042e-07	184	1856	39	0.0210129	0.211957	GO:0030902	GO:BP	hindbrain development	27205	7324
Chn1	chimerin 1 [Source:MGI Symbol;Acc:MGI:1915674]		TRUE	4.45219e-07	97	1856	27	0.0145474	0.278351	GO:0043954	GO:BP	cellular component maintenance	27205	11484
Chst1	carbohydrate sulfotransferase 1 [Source:MGI Symbol;Acc:MGI:1924219]		TRUE	4.52356e-07	566	1856	81	0.0436422	0.14311	GO:0090066	GO:BP	regulation of anatomical structure size	27205	18997
Chst10	carbohydrate sulfotransferase 10 [Source:MGI Symbol;Acc:MGI:2138283]		TRUE	5.43662e-07	357	1856	59	0.0317888	0.165266	GO:0048511	GO:BP	rhythmic process	27205	13534
Ciart	circadian associated repressor of transcription [Source:MGI Symbol;Acc:MGI:2684975]		TRUE	6.3883e-07	67	1856	22	0.0118534	0.328358	GO:0099084	GO:BP	postsynaptic specialization organization	27205	20097
Cipc	CLOCK interacting protein, circadian [Source:MGI Symbol;Acc:MGI:1919185]		TRUE	6.5174e-07	45	1856	18	0.00969828	0.4	GO:0099558	GO:BP	maintenance of synapse structure	27205	20198
Cit	citron [Source:MGI Symbol;Acc:MGI:105313]		TRUE	6.75919e-07	521	1856	76	0.0409483	0.145873	GO:0043410	GO:BP	positive regulation of MAPK cascade	27205	11268
Ckb	creatine kinase, brain [Source:MGI Symbol;Acc:MGI:88407]		TRUE	6.91437e-07	434	1856	67	0.0360991	0.154378	GO:0045936	GO:BP	negative regulation of phosphate metabolic process	27205	12432
Clasp1	CLIP associating protein 1 [Source:MGI Symbol;Acc:MGI:1923957]		TRUE	6.91437e-07	434	1856	67	0.0360991	0.154378	GO:0010563	GO:BP	negative regulation of phosphorus metabolic process	27205	4311
Clasp2	CLIP associating protein 2 [Source:MGI Symbol;Acc:MGI:1923749]		TRUE	7.39372e-07	99	1856	27	0.0145474	0.272727	GO:0008344	GO:BP	adult locomotory behavior	27205	3243
Clcn6	chloride channel, voltage-sensitive 6 [Source:MGI Symbol;Acc:MGI:1347049]		TRUE	7.44648e-07	602	1856	84	0.0452586	0.139535	GO:0070201	GO:BP	regulation of establishment of protein localization	27205	16909
Cldn10	claudin 10 [Source:MGI Symbol;Acc:MGI:1913101]		TRUE	7.52523e-07	454	1856	69	0.0371767	0.151982	GO:0001558	GO:BP	regulation of cell growth	27205	362
Clec3b	C-type lectin domain family 3, member b [Source:MGI Symbol;Acc:MGI:104540]		TRUE	7.8558e-07	127	1856	31	0.0167026	0.244094	GO:0099072	GO:BP	regulation of postsynaptic membrane neurotransmitter receptor levels	27205	20091
Clic6	chloride intracellular channel 6 [Source:MGI Symbol;Acc:MGI:2146607]		TRUE	7.86463e-07	342	1856	57	0.0307112	0.166667	GO:0007265	GO:BP	Ras protein signal transduction	27205	2862
Clip1	CAP-GLY domain containing linker protein 1 [Source:MGI Symbol;Acc:MGI:1928401]		TRUE	7.93083e-07	315	1856	54	0.0290948	0.171429	GO:2000146	GO:BP	negative regulation of cell motility	27205	26748
Clk1	CDC-like kinase 1 [Source:MGI Symbol;Acc:MGI:107403]		TRUE	8.0257e-07	1049	1856	126	0.0678879	0.120114	GO:0044092	GO:BP	negative regulation of molecular function	27205	11548
Clmn	calmin [Source:MGI Symbol;Acc:MGI:2136957]		TRUE	8.45751e-07	417	1856	65	0.0350216	0.155875	GO:1902074	GO:BP	response to salt	27205	23012
Clu	clusterin [Source:MGI Symbol;Acc:MGI:88423]		TRUE	8.83723e-07	68	1856	22	0.0118534	0.323529	GO:0034331	GO:BP	cell junction maintenance	27205	9022
Cmip	c-Maf inducing protein [Source:MGI Symbol;Acc:MGI:1921690]		TRUE	9.58471e-07	205	1856	41	0.0220905	0.2	GO:0030307	GO:BP	positive regulation of cell growth	27205	7125
Cmss1	cms small ribosomal subunit 1 [Source:MGI Symbol;Acc:MGI:1913747]		TRUE	9.74201e-07	197	1856	40	0.0215517	0.203046	GO:0061351	GO:BP	neural precursor cell proliferation	27205	16321
Cnn3	calponin 3, acidic [Source:MGI Symbol;Acc:MGI:1919244]		TRUE	1.01373e-06	114	1856	29	0.015625	0.254386	GO:0035249	GO:BP	synaptic transmission, glutamatergic	27205	9406
Cnnm2	cyclin M2 [Source:MGI Symbol;Acc:MGI:2151054]		TRUE	1.08539e-06	354	1856	58	0.03125	0.163842	GO:0021700	GO:BP	developmental maturation	27205	6632
Cnnm3	cyclin M3 [Source:MGI Symbol;Acc:MGI:2151055]		TRUE	1.14799e-06	373	1856	60	0.0323276	0.160858	GO:0009150	GO:BP	purine ribonucleotide metabolic process	27205	3393
Cnot2	CCR4-NOT transcription complex, subunit 2 [Source:MGI Symbol;Acc:MGI:1919318]		TRUE	1.3506e-06	915	1856	113	0.0608836	0.123497	GO:0045937	GO:BP	positive regulation of phosphate metabolic process	27205	12433
Cnp	2',3'-cyclic nucleotide 3' phosphodiesterase [Source:MGI Symbol;Acc:MGI:88437]		TRUE	1.3506e-06	915	1856	113	0.0608836	0.123497	GO:0010562	GO:BP	positive regulation of phosphorus metabolic process	27205	4310
Cntfr	ciliary neurotrophic factor receptor [Source:MGI Symbol;Acc:MGI:99605]		TRUE	1.42775e-06	241	1856	45	0.0242457	0.186722	GO:0006813	GO:BP	potassium ion transport	27205	2549
Cntn1	contactin 1 [Source:MGI Symbol;Acc:MGI:105980]		TRUE	1.42775e-06	241	1856	45	0.0242457	0.186722	GO:0043583	GO:BP	ear development	27205	11382
Cntnap1	contactin associated protein-like 1 [Source:MGI Symbol;Acc:MGI:1858201]		TRUE	1.45589e-06	82	1856	24	0.012931	0.292683	GO:0048041	GO:BP	focal adhesion assembly	27205	13216
Col1a1	collagen, type I, alpha 1 [Source:MGI Symbol;Acc:MGI:88467]		TRUE	1.46172e-06	394	1856	62	0.0334052	0.15736	GO:0009259	GO:BP	ribonucleotide metabolic process	27205	3500
Col1a2	collagen, type I, alpha 2 [Source:MGI Symbol;Acc:MGI:88468]		TRUE	1.46818e-06	160	1856	35	0.0188578	0.21875	GO:0030178	GO:BP	negative regulation of Wnt signaling pathway	27205	7061
Col23a1	collagen, type XXIII, alpha 1 [Source:MGI Symbol;Acc:MGI:2653243]		TRUE	1.51077e-06	471	1856	70	0.0377155	0.14862	GO:0034765	GO:BP	regulation of monoatomic ion transmembrane transport	27205	9201
Col25a1	collagen, type XXV, alpha 1 [Source:MGI Symbol;Acc:MGI:1924268]		TRUE	1.56112e-06	200	1856	40	0.0215517	0.2	GO:1990138	GO:BP	neuron projection extension	27205	26321
Col9a2	collagen, type IX, alpha 2 [Source:MGI Symbol;Acc:MGI:88466]		TRUE	1.58124e-06	116	1856	29	0.015625	0.25	GO:0120034	GO:BP	positive regulation of plasma membrane bounded cell projection assembly	27205	20547
Colec12	collectin sub-family member 12 [Source:MGI Symbol;Acc:MGI:2152907]		TRUE	1.58364e-06	109	1856	28	0.0150862	0.256881	GO:0106027	GO:BP	neuron projection organization	27205	20283
Cops9	COP9 signalosome subunit 9 [Source:MGI Symbol;Acc:MGI:1914165]		TRUE	1.72953e-06	349	1856	57	0.0307112	0.163324	GO:0040013	GO:BP	negative regulation of locomotion	27205	10466
Coro2b	coronin, actin binding protein, 2B [Source:MGI Symbol;Acc:MGI:2444283]		TRUE	1.73982e-06	695	1856	92	0.049569	0.132374	GO:0080135	GO:BP	regulation of cellular response to stress	27205	18809
Cotl1	coactosin-like 1 (Dictyostelium) [Source:MGI Symbol;Acc:MGI:1919292]		TRUE	1.86262e-06	177	1856	37	0.0199353	0.20904	GO:0010594	GO:BP	regulation of endothelial cell migration	27205	4338
Cox14	cytochrome c oxidase assembly protein 14 [Source:MGI Symbol;Acc:MGI:1913629]		TRUE	2.18136e-06	90	1856	25	0.0134698	0.277778	GO:0097581	GO:BP	lamellipodium organization	27205	19752
Cox4i1	cytochrome c oxidase subunit 4I1 [Source:MGI Symbol;Acc:MGI:88473]		TRUE	2.19516e-06	132	1856	31	0.0167026	0.234848	GO:0022037	GO:BP	metencephalon development	27205	6951
Cox5a	cytochrome c oxidase subunit 5A [Source:MGI Symbol;Acc:MGI:88474]		TRUE	2.19516e-06	132	1856	31	0.0167026	0.234848	GO:0090090	GO:BP	negative regulation of canonical Wnt signaling pathway	27205	19019
Cox5b	cytochrome c oxidase subunit 5B [Source:MGI Symbol;Acc:MGI:88475]		TRUE	2.2775e-06	253	1856	46	0.0247845	0.181818	GO:0006898	GO:BP	receptor-mediated endocytosis	27205	2608
Cox6a1	cytochrome c oxidase subunit 6A1 [Source:MGI Symbol;Acc:MGI:103099]		TRUE	2.42134e-06	957	1856	116	0.0625	0.121212	GO:0009894	GO:BP	regulation of catabolic process	27205	3832
Cox6c	cytochrome c oxidase subunit 6C [Source:MGI Symbol;Acc:MGI:104614]		TRUE	2.49161e-06	506	1856	73	0.0393319	0.144269	GO:0031400	GO:BP	negative regulation of protein modification process	27205	7553
Cox7a2	cytochrome c oxidase subunit 7A2 [Source:MGI Symbol;Acc:MGI:1316715]		TRUE	2.54277e-06	195	1856	39	0.0210129	0.2	GO:0045807	GO:BP	positive regulation of endocytosis	27205	12331
Cox7b	cytochrome c oxidase subunit 7B [Source:MGI Symbol;Acc:MGI:1913392]		TRUE	2.66465e-06	796	1856	101	0.0544181	0.126884	GO:0043009	GO:BP	chordate embryonic development	27205	11060
Cox8a	cytochrome c oxidase subunit 8A [Source:MGI Symbol;Acc:MGI:105959]		TRUE	2.76118e-06	212	1856	41	0.0220905	0.193396	GO:0071805	GO:BP	potassium ion transmembrane transport	27205	17873
Cpe	carboxypeptidase E [Source:MGI Symbol;Acc:MGI:101932]		TRUE	2.85117e-06	229	1856	43	0.0231681	0.187773	GO:0043542	GO:BP	endothelial cell migration	27205	11351
Cpeb3	cytoplasmic polyadenylation element binding protein 3 [Source:MGI Symbol;Acc:MGI:2443075]		TRUE	2.86882e-06	126	1856	30	0.0161638	0.238095	GO:0001952	GO:BP	regulation of cell-matrix adhesion	27205	576
Cpeb4	cytoplasmic polyadenylation element binding protein 4 [Source:MGI Symbol;Acc:MGI:1914829]		TRUE	2.94996e-06	558	1856	78	0.0420259	0.139785	GO:1901652	GO:BP	response to peptide	27205	22626
Cped1	cadherin-like and PC-esterase domain containing 1 [Source:MGI Symbol;Acc:MGI:2444814]		TRUE	2.96814e-06	196	1856	39	0.0210129	0.19898	GO:0048736	GO:BP	appendage development	27205	13733
Cplane1	ciliogenesis and planar polarity effector 1 [Source:MGI Symbol;Acc:MGI:1920942]		TRUE	2.96814e-06	196	1856	39	0.0210129	0.19898	GO:0060173	GO:BP	limb development	27205	15242
Cpne6	copine VI [Source:MGI Symbol;Acc:MGI:1334445]		TRUE	3.02787e-06	188	1856	38	0.0204741	0.202128	GO:0007612	GO:BP	learning	27205	3141
Cpq	carboxypeptidase Q [Source:MGI Symbol;Acc:MGI:1889205]		TRUE	3.05031e-06	60	1856	20	0.0107759	0.333333	GO:0051893	GO:BP	regulation of focal adhesion assembly	27205	14766
Cr2	complement receptor 2 [Source:MGI Symbol;Acc:MGI:88489]		TRUE	3.05031e-06	60	1856	20	0.0107759	0.333333	GO:0090109	GO:BP	regulation of cell-substrate junction assembly	27205	19035
Crebbp	CREB binding protein [Source:MGI Symbol;Acc:MGI:1098280]		TRUE	3.34236e-06	205	1856	40	0.0215517	0.195122	GO:1905475	GO:BP	regulation of protein localization to membrane	27205	25870
Crebrf	CREB3 regulatory factor [Source:MGI Symbol;Acc:MGI:1924378]		TRUE	3.64172e-06	403	1856	62	0.0334052	0.153846	GO:0019693	GO:BP	ribose phosphate metabolic process	27205	6330
Crebzf	CREB/ATF bZIP transcription factor [Source:MGI Symbol;Acc:MGI:2675296]		TRUE	3.73526e-06	674	1856	89	0.0479526	0.132047	GO:0010035	GO:BP	response to inorganic substance	27205	3925
Crim1	cysteine rich transmembrane BMP regulator 1 (chordin like) [Source:MGI Symbol;Acc:MGI:1354756]		TRUE	3.78981e-06	643	1856	86	0.0463362	0.133748	GO:0006325	GO:BP	chromatin organization	27205	2169
Crlf3	cytokine receptor-like factor 3 [Source:MGI Symbol;Acc:MGI:1860086]		TRUE	4.05565e-06	73	1856	22	0.0118534	0.30137	GO:0044458	GO:BP	motile cilium assembly	27205	11654
Crocc	ciliary rootlet coiled-coil, rootletin [Source:MGI Symbol;Acc:MGI:3529431]		TRUE	4.06839e-06	813	1856	102	0.0549569	0.125461	GO:0009792	GO:BP	embryo development ending in birth or egg hatching	27205	3757
Crocc2	ciliary rootlet coiled-coil, rootletin family member 2 [Source:MGI Symbol;Acc:MGI:3045962]		TRUE	4.22036e-06	376	1856	59	0.0317888	0.156915	GO:0042326	GO:BP	negative regulation of phosphorylation	27205	10667
Crtc3	CREB regulated transcription coactivator 3 [Source:MGI Symbol;Acc:MGI:1917711]		TRUE	4.29178e-06	128	1856	30	0.0161638	0.234375	GO:0048259	GO:BP	regulation of receptor-mediated endocytosis	27205	13348
Cry2	cryptochrome 2 (photolyase-like) [Source:MGI Symbol;Acc:MGI:1270859]		TRUE	4.39206e-06	573	1856	79	0.0425647	0.137871	GO:0051223	GO:BP	regulation of protein transport	27205	14345
Crym	crystallin, mu [Source:MGI Symbol;Acc:MGI:102675]		TRUE	4.5764e-06	121	1856	29	0.015625	0.239669	GO:0021549	GO:BP	cerebellum development	27205	6482
Csgalnact1	chondroitin sulfate N-acetylgalactosaminyltransferase 1 [Source:MGI Symbol;Acc:MGI:2442354]		TRUE	4.62567e-06	93	1856	25	0.0134698	0.268817	GO:0007044	GO:BP	cell-substrate junction assembly	27205	2707
Csmd2	CUB and Sushi multiple domains 2 [Source:MGI Symbol;Acc:MGI:2386401]		TRUE	4.9783e-06	259	1856	46	0.0247845	0.177606	GO:0045444	GO:BP	fat cell differentiation	27205	12076
Csmd3	CUB and Sushi multiple domains 3 [Source:MGI Symbol;Acc:MGI:2386403]		TRUE	5.11333e-06	268	1856	47	0.0253233	0.175373	GO:1903522	GO:BP	regulation of blood circulation	27205	24173
Cspg5	chondroitin sulfate proteoglycan 5 [Source:MGI Symbol;Acc:MGI:1352747]		TRUE	5.17319e-06	4156	1856	375	0.202047	0.090231	GO:0006950	GO:BP	response to stress	27205	2640
Cspp1	centrosome and spindle pole associated protein 1 [Source:MGI Symbol;Acc:MGI:2681832]		TRUE	5.59829e-06	332	1856	54	0.0290948	0.162651	GO:0015833	GO:BP	peptide transport	27205	5065
Csrnp3	cysteine-serine-rich nuclear protein 3 [Source:MGI Symbol;Acc:MGI:1925021]		TRUE	5.86374e-06	536	1856	75	0.0404095	0.139925	GO:0006873	GO:BP	intracellular monoatomic ion homeostasis	27205	2587
Cst3	cystatin C [Source:MGI Symbol;Acc:MGI:102519]		TRUE	6.35791e-06	81	1856	23	0.0123922	0.283951	GO:0060998	GO:BP	regulation of dendritic spine development	27205	15993
Ctdspl	CTD (carboxy-terminal domain, RNA polymerase II, polypeptide A) small phosphatase-like [Source:MGI Symbol;Acc:MGI:1916524]		TRUE	6.4191e-06	40	1856	16	0.00862069	0.4	GO:0099645	GO:BP	neurotransmitter receptor localization to postsynaptic specialization membrane	27205	20247
Ctif	CBP80/20-dependent translation initiation factor [Source:MGI Symbol;Acc:MGI:2685518]		TRUE	6.4191e-06	40	1856	16	0.00862069	0.4	GO:0099633	GO:BP	protein localization to postsynaptic specialization membrane	27205	20237
Ctnna2	catenin (cadherin associated protein), alpha 2 [Source:MGI Symbol;Acc:MGI:88275]		TRUE	6.67985e-06	288	1856	49	0.0264009	0.170139	GO:0022898	GO:BP	regulation of transmembrane transporter activity	27205	6991
Ctnnd2	catenin (cadherin associated protein), delta 2 [Source:MGI Symbol;Acc:MGI:1195966]		TRUE	6.77532e-06	161	1856	34	0.018319	0.21118	GO:0035108	GO:BP	limb morphogenesis	27205	9292
Ctsd	cathepsin D [Source:MGI Symbol;Acc:MGI:88562]		TRUE	6.77532e-06	161	1856	34	0.018319	0.21118	GO:0035107	GO:BP	appendage morphogenesis	27205	9291
Ctsl	cathepsin L [Source:MGI Symbol;Acc:MGI:88564]		TRUE	6.94907e-06	210	1856	40	0.0215517	0.190476	GO:0048839	GO:BP	inner ear development	27205	13823
Cux1	cut-like homeobox 1 [Source:MGI Symbol;Acc:MGI:88568]		TRUE	7.06138e-06	88	1856	24	0.012931	0.272727	GO:0008589	GO:BP	regulation of smoothened signaling pathway	27205	3274
Cxcl14	chemokine (C-X-C motif) ligand 14 [Source:MGI Symbol;Acc:MGI:1888514]		TRUE	8.01918e-06	162	1856	34	0.018319	0.209877	GO:0030010	GO:BP	establishment of cell polarity	27205	7012
Gm10053	predicted gene 10053 [Source:MGI Symbol;Acc:MGI:3704493]		TRUE	8.04222e-06	228	1856	42	0.0226293	0.184211	GO:0007160	GO:BP	cell-matrix adhesion	27205	2787
Cycs	cytochrome c, somatic [Source:MGI Symbol;Acc:MGI:88578]		TRUE	8.86249e-06	195	1856	38	0.0204741	0.194872	GO:0031644	GO:BP	regulation of nervous system process	27205	7658
Cyfip1	cytoplasmic FMR1 interacting protein 1 [Source:MGI Symbol;Acc:MGI:1338801]		TRUE	9.28875e-06	155	1856	33	0.0177802	0.212903	GO:0010634	GO:BP	positive regulation of epithelial cell migration	27205	4376
Cyld	CYLD lysine 63 deubiquitinase [Source:MGI Symbol;Acc:MGI:1921506]		TRUE	9.31414e-06	4334	1856	387	0.208513	0.089294	GO:0044085	GO:BP	cellular component biogenesis	27205	11542
Cyp27a1	cytochrome P450, family 27, subfamily a, polypeptide 1 [Source:MGI Symbol;Acc:MGI:88594]		TRUE	9.33949e-06	132	1856	30	0.0161638	0.227273	GO:0099175	GO:BP	regulation of postsynapse organization	27205	20145
Cyp2j6	cytochrome P450, family 2, subfamily j, polypeptide 6 [Source:MGI Symbol;Acc:MGI:1270148]		TRUE	9.42148e-06	76	1856	22	0.0118534	0.289474	GO:0051965	GO:BP	positive regulation of synapse assembly	27205	14823
Cyp4f15	cytochrome P450, family 4, subfamily f, polypeptide 15 [Source:MGI Symbol;Acc:MGI:2146921]		TRUE	9.86402e-06	482	1856	69	0.0371767	0.143154	GO:0043434	GO:BP	response to peptide hormone	27205	11281
Cyp51	cytochrome P450, family 51 [Source:MGI Symbol;Acc:MGI:106040]		TRUE	1.0561e-05	1462	1856	158	0.0851293	0.108071	GO:0006629	GO:BP	lipid metabolic process	27205	2396
Cystm1	cysteine-rich transmembrane module containing 1 [Source:MGI Symbol;Acc:MGI:1913310]		TRUE	1.05864e-05	2529	1856	246	0.132543	0.0972716	GO:0009056	GO:BP	catabolic process	27205	3308
Cyth1	cytohesin 1 [Source:MGI Symbol;Acc:MGI:1334257]		TRUE	1.06623e-05	636	1856	84	0.0452586	0.132075	GO:0010817	GO:BP	regulation of hormone levels	27205	4533
D030047H15Rik	RIKEN cDNA D030047H15 gene [Source:MGI Symbol;Acc:MGI:3698136]		TRUE	1.09608e-05	64	1856	20	0.0107759	0.3125	GO:1903539	GO:BP	protein localization to postsynaptic membrane	27205	24190
D030068K23Rik	RIKEN cDNA D030068K23 gene [Source:MGI Symbol;Acc:MGI:3037424]		TRUE	1.09668e-05	58	1856	19	0.0102371	0.327586	GO:0097106	GO:BP	postsynaptic density organization	27205	19534
D130040H23Rik	RIKEN cDNA D130040H23 gene [Source:MGI Symbol;Acc:MGI:2444324]		TRUE	1.16436e-05	311	1856	51	0.0274784	0.163987	GO:0030072	GO:BP	peptide hormone secretion	27205	7035
D3Ertd751e	DNA segment, Chr 3, ERATO Doi 751, expressed [Source:MGI Symbol;Acc:MGI:1289213]		TRUE	1.17063e-05	504	1856	71	0.0382543	0.140873	GO:0072521	GO:BP	purine-containing compound metabolic process	27205	18397
D5Ertd579e	DNA segment, Chr 5, ERATO Doi 579, expressed [Source:MGI Symbol;Acc:MGI:1261849]		TRUE	1.18702e-05	690	1856	89	0.0479526	0.128986	GO:0008610	GO:BP	lipid biosynthetic process	27205	3281
D630003M21Rik	RIKEN cDNA D630003M21 gene [Source:MGI Symbol;Acc:MGI:3606579]		TRUE	1.21638e-05	1571	1856	167	0.0899784	0.106302	GO:0046907	GO:BP	intracellular transport	27205	13156
D830024N08Rik	RIKEN cDNA D830024N08 gene [Source:MGI Symbol;Acc:MGI:2442966]		TRUE	1.2831e-05	181	1856	36	0.0193966	0.198895	GO:0048592	GO:BP	eye morphogenesis	27205	13601
Daam2	dishevelled associated activator of morphogenesis 2 [Source:MGI Symbol;Acc:MGI:1923691]		TRUE	1.30383e-05	206	1856	39	0.0210129	0.18932	GO:1902075	GO:BP	cellular response to salt	27205	23013
Dab2	disabled 2, mitogen-responsive phosphoprotein [Source:MGI Symbol;Acc:MGI:109175]		TRUE	1.30876e-05	173	1856	35	0.0188578	0.202312	GO:1902904	GO:BP	negative regulation of supramolecular fiber organization	27205	23661
Dach1	dachshund family transcription factor 1 [Source:MGI Symbol;Acc:MGI:1277991]		TRUE	1.3212e-05	397	1856	60	0.0323276	0.151134	GO:1901653	GO:BP	cellular response to peptide	27205	22627
Dad1	defender against cell death 1 [Source:MGI Symbol;Acc:MGI:101912]		TRUE	1.38212e-05	650	1856	85	0.0457974	0.130769	GO:1901137	GO:BP	carbohydrate derivative biosynthetic process	27205	22201
Dagla	diacylglycerol lipase, alpha [Source:MGI Symbol;Acc:MGI:2677061]		TRUE	1.43057e-05	241	1856	43	0.0231681	0.178423	GO:0060047	GO:BP	heart contraction	27205	15141
Dalrd3	DALR anticodon binding domain containing 3 [Source:MGI Symbol;Acc:MGI:1915039]		TRUE	1.48203e-05	65	1856	20	0.0107759	0.307692	GO:0062237	GO:BP	protein localization to postsynapse	27205	16804
Dancr	differentiation antagonizing non-protein coding RNA [Source:MGI Symbol;Acc:MGI:1917286]		TRUE	1.64685e-05	468	1856	67	0.0360991	0.143162	GO:0006163	GO:BP	purine nucleotide metabolic process	27205	2042
Dapk1	death associated protein kinase 1 [Source:MGI Symbol;Acc:MGI:1916885]		TRUE	1.73042e-05	143	1856	31	0.0167026	0.216783	GO:0031623	GO:BP	receptor internalization	27205	7644
Dapk2	death-associated protein kinase 2 [Source:MGI Symbol;Acc:MGI:1341297]		TRUE	1.75584e-05	324	1856	52	0.0280172	0.160494	GO:0019932	GO:BP	second-messenger-mediated signaling	27205	6416
Daw1	dynein assembly factor with WDR repeat domains 1 [Source:MGI Symbol;Acc:MGI:1923089]		TRUE	1.81863e-05	167	1856	34	0.018319	0.203593	GO:0009205	GO:BP	purine ribonucleoside triphosphate metabolic process	27205	3447
Dbi	diazepam binding inhibitor [Source:MGI Symbol;Acc:MGI:94865]		TRUE	2.11459e-05	451	1856	65	0.0350216	0.144124	GO:0006816	GO:BP	calcium ion transport	27205	2551
Dbp	D site albumin promoter binding protein [Source:MGI Symbol;Acc:MGI:94866]		TRUE	2.22486e-05	345	1856	54	0.0290948	0.156522	GO:0055074	GO:BP	calcium ion homeostasis	27205	15061
Dbx2	developing brain homeobox 2 [Source:MGI Symbol;Acc:MGI:107445]		TRUE	2.34157e-05	100	1856	25	0.0134698	0.25	GO:0097061	GO:BP	dendritic spine organization	27205	19503
Dcaf17	DDB1 and CUL4 associated factor 17 [Source:MGI Symbol;Acc:MGI:1923013]		TRUE	2.34968e-05	137	1856	30	0.0161638	0.218978	GO:0050773	GO:BP	regulation of dendrite development	27205	13993
Dcaf6	DDB1 and CUL4 associated factor 6 [Source:MGI Symbol;Acc:MGI:1921356]		TRUE	2.37167e-05	1874	1856	191	0.102909	0.101921	GO:0044281	GO:BP	small molecule metabolic process	27205	11589
Dcc	deleted in colorectal carcinoma [Source:MGI Symbol;Acc:MGI:94869]		TRUE	2.46228e-05	365	1856	56	0.0301724	0.153425	GO:0060562	GO:BP	epithelial tube morphogenesis	27205	15589
Dcdc2a	doublecortin domain containing 2a [Source:MGI Symbol;Acc:MGI:2652818]		TRUE	2.50195e-05	318	1856	51	0.0274784	0.160377	GO:0002790	GO:BP	peptide secretion	27205	1320
Dclk1	doublecortin-like kinase 1 [Source:MGI Symbol;Acc:MGI:1330861]		TRUE	2.70491e-05	504	1856	70	0.0377155	0.138889	GO:0051051	GO:BP	negative regulation of transport	27205	14221
Ddhd1	DDHD domain containing 1 [Source:MGI Symbol;Acc:MGI:2150302]		TRUE	2.72851e-05	347	1856	54	0.0290948	0.15562	GO:0001933	GO:BP	negative regulation of protein phosphorylation	27205	562
Ddit4	DNA-damage-inducible transcript 4 [Source:MGI Symbol;Acc:MGI:1921997]		TRUE	2.7354e-05	282	1856	47	0.0253233	0.166667	GO:0034599	GO:BP	cellular response to oxidative stress	27205	9144
Ddo	D-aspartate oxidase [Source:MGI Symbol;Acc:MGI:1925528]		TRUE	2.80833e-05	138	1856	30	0.0161638	0.217391	GO:0003158	GO:BP	endothelium development	27205	1613
Ddx17	DEAD box helicase 17 [Source:MGI Symbol;Acc:MGI:1914290]		TRUE	3.06667e-05	283	1856	47	0.0253233	0.166078	GO:0110053	GO:BP	regulation of actin filament organization	27205	20452
Ddx3y	DEAD box helicase 3, Y-linked [Source:MGI Symbol;Acc:MGI:1349406]		TRUE	3.3813e-05	759	1856	94	0.0506466	0.123847	GO:0030855	GO:BP	epithelial cell differentiation	27205	7304
Ddx5	DEAD box helicase 5 [Source:MGI Symbol;Acc:MGI:105037]		TRUE	3.47461e-05	163	1856	33	0.0177802	0.202454	GO:0007613	GO:BP	memory	27205	3142
Dennd1a	DENN/MADD domain containing 1A [Source:MGI Symbol;Acc:MGI:2442794]		TRUE	3.75869e-05	549	1856	74	0.0398707	0.134791	GO:0001501	GO:BP	skeletal system development	27205	331
Dennd1b	DENN/MADD domain containing 1B [Source:MGI Symbol;Acc:MGI:2447812]		TRUE	3.84639e-05	285	1856	47	0.0253233	0.164912	GO:0045165	GO:BP	cell fate commitment	27205	11997
Depdc5	DEP domain containing 5 [Source:MGI Symbol;Acc:MGI:2141101]		TRUE	4.08191e-05	708	1856	89	0.0479526	0.125706	GO:0043549	GO:BP	regulation of kinase activity	27205	11355
Deptor	DEP domain containing MTOR-interacting protein [Source:MGI Symbol;Acc:MGI:2146322]		TRUE	4.21351e-05	592	1856	78	0.0420259	0.131757	GO:0055086	GO:BP	nucleobase-containing small molecule metabolic process	27205	15068
Desi2	desumoylating isopeptidase 2 [Source:MGI Symbol;Acc:MGI:1926075]		TRUE	4.40334e-05	250	1856	43	0.0231681	0.172	GO:0006814	GO:BP	sodium ion transport	27205	2550
Dgkb	diacylglycerol kinase, beta [Source:MGI Symbol;Acc:MGI:2442474]		TRUE	4.4385e-05	181	1856	35	0.0188578	0.19337	GO:0050905	GO:BP	neuromuscular process	27205	14100
Dgki	diacylglycerol kinase, iota [Source:MGI Symbol;Acc:MGI:2443430]		TRUE	4.55705e-05	430	1856	62	0.0334052	0.144186	GO:0042692	GO:BP	muscle cell differentiation	27205	10878
Dhcr24	24-dehydrocholesterol reductase [Source:MGI Symbol;Acc:MGI:1922004]		TRUE	4.55719e-05	133	1856	29	0.015625	0.218045	GO:0014013	GO:BP	regulation of gliogenesis	27205	4702
Dhcr7	7-dehydrocholesterol reductase [Source:MGI Symbol;Acc:MGI:1298378]		TRUE	4.58789e-05	531	1856	72	0.0387931	0.135593	GO:0006753	GO:BP	nucleoside phosphate metabolic process	27205	2505
Dhrs3	dehydrogenase/reductase (SDR family) member 3 [Source:MGI Symbol;Acc:MGI:1315215]		TRUE	4.62204e-05	173	1856	34	0.018319	0.196532	GO:0030534	GO:BP	adult behavior	27205	7202
Diaph2	diaphanous related formin 2 [Source:MGI Symbol;Acc:MGI:1858500]		TRUE	4.62204e-05	173	1856	34	0.018319	0.196532	GO:0009144	GO:BP	purine nucleoside triphosphate metabolic process	27205	3387
Diaph3	diaphanous related formin 3 [Source:MGI Symbol;Acc:MGI:1927222]		TRUE	4.67917e-05	521	1856	71	0.0382543	0.136276	GO:0009117	GO:BP	nucleotide metabolic process	27205	3362
Dicer1	dicer 1, ribonuclease type III [Source:MGI Symbol;Acc:MGI:2177178]		TRUE	4.7921e-05	830	1856	100	0.0538793	0.120482	GO:0042327	GO:BP	positive regulation of phosphorylation	27205	10668
Dido1	death inducer-obliterator 1 [Source:MGI Symbol;Acc:MGI:1344352]		TRUE	4.817e-05	233	1856	41	0.0220905	0.175966	GO:0051403	GO:BP	stress-activated MAPK cascade	27205	14472
Dio2	deiodinase, iodothyronine, type II [Source:MGI Symbol;Acc:MGI:1338833]		TRUE	4.91441e-05	242	1856	42	0.0226293	0.173554	GO:0007623	GO:BP	circadian rhythm	27205	3152
Dip2c	disco interacting protein 2 homolog C [Source:MGI Symbol;Acc:MGI:1920179]		TRUE	5.15119e-05	111	1856	26	0.0140086	0.234234	GO:0032231	GO:BP	regulation of actin filament bundle assembly	27205	7840
Dis3l2	DIS3 like 3'-5' exoribonuclease 2 [Source:MGI Symbol;Acc:MGI:2442555]		TRUE	5.61954e-05	142	1856	30	0.0161638	0.211268	GO:0099565	GO:BP	chemical synaptic transmission, postsynaptic	27205	20205
Disc1	disrupted in schizophrenia 1 [Source:MGI Symbol;Acc:MGI:2447658]		TRUE	5.76489e-05	1023	1856	117	0.0630388	0.11437	GO:0030097	GO:BP	hemopoiesis	27205	7038
Dkk3	dickkopf WNT signaling pathway inhibitor 3 [Source:MGI Symbol;Acc:MGI:1354952]		TRUE	5.88556e-05	423	1856	61	0.0328664	0.144208	GO:0071692	GO:BP	protein localization to extracellular region	27205	17810
Dlg2	discs large MAGUK scaffold protein 2 [Source:MGI Symbol;Acc:MGI:1344351]		TRUE	6.10517e-05	336	1856	52	0.0280172	0.154762	GO:0071375	GO:BP	cellular response to peptide hormone stimulus	27205	17573
Dlg4	discs large MAGUK scaffold protein 4 [Source:MGI Symbol;Acc:MGI:1277959]		TRUE	6.13548e-05	280	1856	46	0.0247845	0.164286	GO:0098742	GO:BP	cell-cell adhesion via plasma-membrane adhesion molecules	27205	19918
Dlgap1	DLG associated protein 1 [Source:MGI Symbol;Acc:MGI:1346065]		TRUE	6.23609e-05	175	1856	34	0.018319	0.194286	GO:0009199	GO:BP	ribonucleoside triphosphate metabolic process	27205	3441
Dlk1	delta like non-canonical Notch ligand 1 [Source:MGI Symbol;Acc:MGI:94900]		TRUE	6.45617e-05	672	1856	85	0.0457974	0.126488	GO:0010942	GO:BP	positive regulation of cell death	27205	4636
Dmd	dystrophin, muscular dystrophy [Source:MGI Symbol;Acc:MGI:94909]		TRUE	6.6922e-05	1467	1856	155	0.0835129	0.105658	GO:0080134	GO:BP	regulation of response to stress	27205	18808
Dmtf1	cyclin D binding myb like transcription factor 1 [Source:MGI Symbol;Acc:MGI:1344415]		TRUE	6.83909e-05	858	1856	102	0.0549569	0.118881	GO:1901699	GO:BP	cellular response to nitrogen compound	27205	22660
Dmxl1	Dmx-like 1 [Source:MGI Symbol;Acc:MGI:2443926]		TRUE	6.89714e-05	201	1856	37	0.0199353	0.18408	GO:0046578	GO:BP	regulation of Ras protein signal transduction	27205	12946
Dnaaf3	dynein, axonemal assembly factor 3 [Source:MGI Symbol;Acc:MGI:3588207]		TRUE	7.08025e-05	245	1856	42	0.0226293	0.171429	GO:0031098	GO:BP	stress-activated protein kinase signaling cascade	27205	7407
Dnah11	dynein, axonemal, heavy chain 11 [Source:MGI Symbol;Acc:MGI:1100864]		TRUE	7.10131e-05	254	1856	43	0.0231681	0.169291	GO:0003015	GO:BP	heart process	27205	1485
Dnah12	dynein, axonemal, heavy chain 12 [Source:MGI Symbol;Acc:MGI:107720]		TRUE	7.2036e-05	506	1856	69	0.0371767	0.136364	GO:0048568	GO:BP	embryonic organ development	27205	13579
Dnah2	dynein, axonemal, heavy chain 2 [Source:MGI Symbol;Acc:MGI:107731]		TRUE	7.2697e-05	386	1856	57	0.0307112	0.147668	GO:0018108	GO:BP	peptidyl-tyrosine phosphorylation	27205	5495
Dnah3	dynein, axonemal, heavy chain 3 [Source:MGI Symbol;Acc:MGI:2683040]		TRUE	7.29129e-05	537	1856	72	0.0387931	0.134078	GO:0010638	GO:BP	positive regulation of organelle organization	27205	4380
Dnah6	dynein, axonemal, heavy chain 6 [Source:MGI Symbol;Acc:MGI:107744]		TRUE	7.45648e-05	338	1856	52	0.0280172	0.153846	GO:0051222	GO:BP	positive regulation of protein transport	27205	14344
Dnah7a	dynein, axonemal, heavy chain 7A [Source:MGI Symbol;Acc:MGI:2685838]		TRUE	7.85982e-05	144	1856	30	0.0161638	0.208333	GO:0048593	GO:BP	camera-type eye morphogenesis	27205	13602
Dnah7b	dynein, axonemal, heavy chain 7B [Source:MGI Symbol;Acc:MGI:2684953]		TRUE	7.93149e-05	71	1856	20	0.0107759	0.28169	GO:0048168	GO:BP	regulation of neuronal synaptic plasticity	27205	13298
Dnah9	dynein, axonemal, heavy chain 9 [Source:MGI Symbol;Acc:MGI:1289279]		TRUE	8.51961e-05	194	1856	36	0.0193966	0.185567	GO:0009141	GO:BP	nucleoside triphosphate metabolic process	27205	3384
Dnajb9	DnaJ heat shock protein family (Hsp40) member B9 [Source:MGI Symbol;Acc:MGI:1351618]		TRUE	8.59066e-05	220	1856	39	0.0210129	0.177273	GO:0071383	GO:BP	cellular response to steroid hormone stimulus	27205	17581
Dnajc1	DnaJ heat shock protein family (Hsp40) member C1 [Source:MGI Symbol;Acc:MGI:103268]		TRUE	8.73325e-05	388	1856	57	0.0307112	0.146907	GO:0018212	GO:BP	peptidyl-tyrosine modification	27205	5575
Dnajc27	DnaJ heat shock protein family (Hsp40) member C27 [Source:MGI Symbol;Acc:MGI:2443036]		TRUE	9.56572e-05	389	1856	57	0.0307112	0.14653	GO:0019216	GO:BP	regulation of lipid metabolic process	27205	5894
Dnajc6	DnaJ heat shock protein family (Hsp40) member C6 [Source:MGI Symbol;Acc:MGI:1919935]		TRUE	9.71315e-05	47	1856	16	0.00862069	0.340426	GO:0014003	GO:BP	oligodendrocyte development	27205	4692
Dnal1	dynein, axonemal, light chain 1 [Source:MGI Symbol;Acc:MGI:1921462]		TRUE	9.75216e-05	36	1856	14	0.0075431	0.388889	GO:0060074	GO:BP	synapse maturation	27205	15166
Dnm3	dynamin 3 [Source:MGI Symbol;Acc:MGI:1341299]		TRUE	9.75216e-05	36	1856	14	0.0075431	0.388889	GO:0060292	GO:BP	long-term synaptic depression	27205	15340
Dnmt3a	DNA methyltransferase 3A [Source:MGI Symbol;Acc:MGI:1261827]		TRUE	9.77926e-05	275	1856	45	0.0242457	0.163636	GO:0032412	GO:BP	regulation of monoatomic ion transmembrane transporter activity	27205	7970
Dock1	dedicator of cytokinesis 1 [Source:MGI Symbol;Acc:MGI:2429765]		TRUE	9.91171e-05	439	1856	62	0.0334052	0.14123	GO:0070997	GO:BP	neuron death	27205	17362
Dock10	dedicator of cytokinesis 10 [Source:MGI Symbol;Acc:MGI:2146320]		TRUE	9.96915e-05	230	1856	40	0.0215517	0.173913	GO:0003018	GO:BP	vascular process in circulatory system	27205	1488
Dock11	dedicator of cytokinesis 11 [Source:MGI Symbol;Acc:MGI:1923224]		TRUE	0.000100778	257	1856	43	0.0231681	0.167315	GO:0030073	GO:BP	insulin secretion	27205	7036
Dock3	dedicator of cyto-kinesis 3 [Source:MGI Symbol;Acc:MGI:2429763]		TRUE	0.00010281	72	1856	20	0.0107759	0.277778	GO:0060997	GO:BP	dendritic spine morphogenesis	27205	15992
Dock4	dedicator of cytokinesis 4 [Source:MGI Symbol;Acc:MGI:1918006]		TRUE	0.00010281	72	1856	20	0.0107759	0.277778	GO:0030032	GO:BP	lamellipodium assembly	27205	7018
Dock5	dedicator of cytokinesis 5 [Source:MGI Symbol;Acc:MGI:2652871]		TRUE	0.000103153	204	1856	37	0.0199353	0.181373	GO:0021543	GO:BP	pallium development	27205	6476
Dok6	docking protein 6 [Source:MGI Symbol;Acc:MGI:3639495]		TRUE	0.00010409	351	1856	53	0.028556	0.150997	GO:1904062	GO:BP	regulation of monoatomic cation transmembrane transport	27205	24641
Dok7	docking protein 7 [Source:MGI Symbol;Acc:MGI:3584043]		TRUE	0.000105423	470	1856	65	0.0350216	0.138298	GO:0006338	GO:BP	chromatin remodeling	27205	2173
Dop1a	DOP1 leucine zipper like protein A [Source:MGI Symbol;Acc:MGI:1289294]		TRUE	0.00010914	146	1856	30	0.0161638	0.205479	GO:0006119	GO:BP	oxidative phosphorylation	27205	2021
Dpf3	double PHD fingers 3 [Source:MGI Symbol;Acc:MGI:1917377]		TRUE	0.000111616	323	1856	50	0.0269397	0.154799	GO:0050708	GO:BP	regulation of protein secretion	27205	13967
Dpp6	dipeptidylpeptidase 6 [Source:MGI Symbol;Acc:MGI:94921]		TRUE	0.000111738	811	1856	97	0.0522629	0.119605	GO:0071417	GO:BP	cellular response to organonitrogen compound	27205	17615
Dpyd	dihydropyrimidine dehydrogenase [Source:MGI Symbol;Acc:MGI:2139667]		TRUE	0.000113074	258	1856	43	0.0231681	0.166667	GO:0090276	GO:BP	regulation of peptide hormone secretion	27205	19185
Drc1	dynein regulatory complex subunit 1 [Source:MGI Symbol;Acc:MGI:2685906]		TRUE	0.000128093	197	1856	36	0.0193966	0.182741	GO:0030705	GO:BP	cytoskeleton-dependent intracellular transport	27205	7252
Dtna	dystrobrevin alpha [Source:MGI Symbol;Acc:MGI:106039]		TRUE	0.00012827	147	1856	30	0.0161638	0.204082	GO:0045598	GO:BP	regulation of fat cell differentiation	27205	12149
Dtnb	dystrobrevin, beta [Source:MGI Symbol;Acc:MGI:1203728]		TRUE	0.000128786	180	1856	34	0.018319	0.188889	GO:0009755	GO:BP	hormone-mediated signaling pathway	27205	3730
Dtx1	deltex 1, E3 ubiquitin ligase [Source:MGI Symbol;Acc:MGI:1352744]		TRUE	0.000134792	116	1856	26	0.0140086	0.224138	GO:0009206	GO:BP	purine ribonucleoside triphosphate biosynthetic process	27205	3448
Dtx3	deltex 3, E3 ubiquitin ligase [Source:MGI Symbol;Acc:MGI:2135752]		TRUE	0.000138389	189	1856	35	0.0188578	0.185185	GO:0060041	GO:BP	retina development in camera-type eye	27205	15135
Dusp1	dual specificity phosphatase 1 [Source:MGI Symbol;Acc:MGI:105120]		TRUE	0.000138417	403	1856	58	0.03125	0.143921	GO:0009914	GO:BP	hormone transport	27205	3848
Dync2h1	dynein cytoplasmic 2 heavy chain 1 [Source:MGI Symbol;Acc:MGI:107736]		TRUE	0.000138554	354	1856	53	0.028556	0.149718	GO:1904951	GO:BP	positive regulation of establishment of protein localization	27205	25409
Dynll1	dynein light chain LC8-type 1 [Source:MGI Symbol;Acc:MGI:1861457]		TRUE	0.000138799	215	1856	38	0.0204741	0.176744	GO:0050796	GO:BP	regulation of insulin secretion	27205	14010
Dynlt1b	dynein light chain Tctex-type 1B [Source:MGI Symbol;Acc:MGI:98643]		TRUE	0.000138799	215	1856	38	0.0204741	0.176744	GO:0060538	GO:BP	skeletal muscle organ development	27205	15568
Dzank1	double zinc ribbon and ankyrin repeat domains 1 [Source:MGI Symbol;Acc:MGI:2139080]		TRUE	0.000141722	1040	1856	117	0.0630388	0.1125	GO:0043066	GO:BP	negative regulation of apoptotic process	27205	11094
Dzip1l	DAZ interacting protein 1-like [Source:MGI Symbol;Acc:MGI:1919757]		TRUE	0.000142335	364	1856	54	0.0290948	0.148352	GO:0042176	GO:BP	regulation of protein catabolic process	27205	10576
E130102H24Rik	RIKEN cDNA E130102H24 gene [Source:MGI Symbol;Acc:MGI:1925116]		TRUE	0.000148833	132	1856	28	0.0150862	0.212121	GO:0030326	GO:BP	embryonic limb morphogenesis	27205	7138
E130307A14Rik	RIKEN cDNA E130307A14 gene [Source:MGI Symbol;Acc:MGI:3036287]		TRUE	0.000148833	132	1856	28	0.0150862	0.212121	GO:0035113	GO:BP	embryonic appendage morphogenesis	27205	9294
Ece1	endothelin converting enzyme 1 [Source:MGI Symbol;Acc:MGI:1101357]		TRUE	0.000150092	1064	1856	119	0.0641164	0.111842	GO:0043069	GO:BP	negative regulation of programmed cell death	27205	11097
Ech1	enoyl coenzyme A hydratase 1, peroxisomal [Source:MGI Symbol;Acc:MGI:1858208]		TRUE	0.000162153	117	1856	26	0.0140086	0.222222	GO:0009145	GO:BP	purine nucleoside triphosphate biosynthetic process	27205	3388
Echdc2	enoyl Coenzyme A hydratase domain containing 2 [Source:MGI Symbol;Acc:MGI:1289238]		TRUE	0.000170074	74	1856	20	0.0107759	0.27027	GO:0043113	GO:BP	receptor clustering	27205	11121
Ecpas	Ecm29 proteasome adaptor and scaffold [Source:MGI Symbol;Acc:MGI:2140220]		TRUE	0.000176369	133	1856	28	0.0150862	0.210526	GO:0021987	GO:BP	cerebral cortex development	27205	6902
Ect2l	epithelial cell transforming sequence 2 oncogene-like [Source:MGI Symbol;Acc:MGI:3641723]		TRUE	0.00017744	81	1856	21	0.0113147	0.259259	GO:0002090	GO:BP	regulation of receptor internalization	27205	693
Ednrb	endothelin receptor type B [Source:MGI Symbol;Acc:MGI:102720]		TRUE	0.000180156	416	1856	59	0.0317888	0.141827	GO:0035592	GO:BP	establishment of protein localization to extracellular region	27205	9611
Edrf1	erythroid differentiation regulatory factor 1 [Source:MGI Symbol;Acc:MGI:1919831]		TRUE	0.000187285	55	1856	17	0.00915948	0.309091	GO:0099054	GO:BP	presynapse assembly	27205	20088
Eef1a2	eukaryotic translation elongation factor 1 alpha 2 [Source:MGI Symbol;Acc:MGI:1096317]		TRUE	0.000196498	2151	1856	209	0.112608	0.0971641	GO:1901575	GO:BP	organic substance catabolic process	27205	22570
Eef1b2	eukaryotic translation elongation factor 1 beta 2 [Source:MGI Symbol;Acc:MGI:1929520]		TRUE	0.000198792	263	1856	43	0.0231681	0.163498	GO:0002791	GO:BP	regulation of peptide secretion	27205	1321
Eef1g	eukaryotic translation elongation factor 1 gamma [Source:MGI Symbol;Acc:MGI:1914410]		TRUE	0.000240253	104	1856	24	0.012931	0.230769	GO:0016079	GO:BP	synaptic vesicle exocytosis	27205	5230
Efcc1	EF hand and coiled-coil domain containing 1 [Source:MGI Symbol;Acc:MGI:3611451]		TRUE	0.000245419	143	1856	29	0.015625	0.202797	GO:0046034	GO:BP	ATP metabolic process	27205	12513
Efhb	EF hand domain family, member B [Source:MGI Symbol;Acc:MGI:3045296]		TRUE	0.000246209	135	1856	28	0.0150862	0.207407	GO:0060079	GO:BP	excitatory postsynaptic potential	27205	15169
Efhd1	EF hand domain containing 1 [Source:MGI Symbol;Acc:MGI:1921607]		TRUE	0.000247177	202	1856	36	0.0193966	0.178218	GO:0007519	GO:BP	skeletal muscle tissue development	27205	3072
Efhd2	EF hand domain containing 2 [Source:MGI Symbol;Acc:MGI:106504]		TRUE	0.00024783	265	1856	43	0.0231681	0.162264	GO:0090087	GO:BP	regulation of peptide transport	27205	19016
Efna5	ephrin A5 [Source:MGI Symbol;Acc:MGI:107444]		TRUE	0.000249036	33	1856	13	0.00700431	0.393939	GO:0021846	GO:BP	cell proliferation in forebrain	27205	6774
Efr3b	EFR3 homolog B [Source:MGI Symbol;Acc:MGI:2444851]		TRUE	0.00026507	19	1856	10	0.00538793	0.526316	GO:0090660	GO:BP	cerebrospinal fluid circulation	27205	19425
Egfem1	EGF-like and EMI domain containing 1 [Source:MGI Symbol;Acc:MGI:1922990]		TRUE	0.000275868	76	1856	20	0.0107759	0.263158	GO:0046847	GO:BP	filopodium assembly	27205	13118
Egfl6	EGF-like-domain, multiple 6 [Source:MGI Symbol;Acc:MGI:1858599]		TRUE	0.000287253	128	1856	27	0.0145474	0.210938	GO:0043401	GO:BP	steroid hormone mediated signaling pathway	27205	11260
Egfr	epidermal growth factor receptor [Source:MGI Symbol;Acc:MGI:95294]		TRUE	0.000290126	304	1856	47	0.0253233	0.154605	GO:0032868	GO:BP	response to insulin	27205	8292
Egr1	early growth response 1 [Source:MGI Symbol;Acc:MGI:95295]		TRUE	0.000291453	105	1856	24	0.012931	0.228571	GO:0006754	GO:BP	ATP biosynthetic process	27205	2506
Ehmt1	euchromatic histone methyltransferase 1 [Source:MGI Symbol;Acc:MGI:1924933]		TRUE	0.000300466	402	1856	57	0.0307112	0.141791	GO:0007178	GO:BP	transmembrane receptor protein serine/threonine kinase signaling pathway	27205	2803
Eif1	eukaryotic translation initiation factor 1 [Source:MGI Symbol;Acc:MGI:105125]		TRUE	0.000301044	63	1856	18	0.00969828	0.285714	GO:0099172	GO:BP	presynapse organization	27205	20142
Eif4g3	eukaryotic translation initiation factor 4 gamma, 3 [Source:MGI Symbol;Acc:MGI:1923935]		TRUE	0.000312615	353	1856	52	0.0280172	0.147309	GO:0015980	GO:BP	energy derivation by oxidation of organic compounds	27205	5183
Elmo1	engulfment and cell motility 1 [Source:MGI Symbol;Acc:MGI:2153044]		TRUE	0.000316572	258	1856	42	0.0226293	0.162791	GO:0060541	GO:BP	respiratory system development	27205	15571
Elmo2	engulfment and cell motility 2 [Source:MGI Symbol;Acc:MGI:2153045]		TRUE	0.000329081	526	1856	69	0.0371767	0.131179	GO:0030003	GO:BP	intracellular monoatomic cation homeostasis	27205	7010
Elmod1	ELMO/CED-12 domain containing 1 [Source:MGI Symbol;Acc:MGI:3583900]		TRUE	0.000333485	70	1856	19	0.0102371	0.271429	GO:0050805	GO:BP	negative regulation of synaptic transmission	27205	14017
Elob	elongin B [Source:MGI Symbol;Acc:MGI:1914923]		TRUE	0.000337194	296	1856	46	0.0247845	0.155405	GO:0061448	GO:BP	connective tissue development	27205	16392
Elovl2	elongation of very long chain fatty acids (FEN1/Elo2, SUR4/Elo3, yeast)-like 2 [Source:MGI Symbol;Acc:MGI:1858960]		TRUE	0.000339904	129	1856	27	0.0145474	0.209302	GO:0002040	GO:BP	sprouting angiogenesis	27205	657
Elovl5	ELOVL family member 5, elongation of long chain fatty acids (yeast) [Source:MGI Symbol;Acc:MGI:1916051]		TRUE	0.000365124	179	1856	33	0.0177802	0.184358	GO:0007219	GO:BP	Notch signaling pathway	27205	2840
Elovl6	ELOVL family member 6, elongation of long chain fatty acids (yeast) [Source:MGI Symbol;Acc:MGI:2156528]		TRUE	0.000385467	415	1856	58	0.03125	0.139759	GO:0009306	GO:BP	protein secretion	27205	3528
Elp4	elongator acetyltransferase complex subunit 4 [Source:MGI Symbol;Acc:MGI:1925016]		TRUE	0.000392242	64	1856	18	0.00969828	0.28125	GO:0048260	GO:BP	positive regulation of receptor-mediated endocytosis	27205	13349
Emc7	ER membrane protein complex subunit 7 [Source:MGI Symbol;Acc:MGI:1920274]		TRUE	0.000392459	146	1856	29	0.015625	0.19863	GO:1904375	GO:BP	regulation of protein localization to cell periphery	27205	24916
Eml2	echinoderm microtubule associated protein like 2 [Source:MGI Symbol;Acc:MGI:1919455]		TRUE	0.000394386	122	1856	26	0.0140086	0.213115	GO:0009201	GO:BP	ribonucleoside triphosphate biosynthetic process	27205	3443
Eml5	echinoderm microtubule associated protein like 5 [Source:MGI Symbol;Acc:MGI:2442513]		TRUE	0.00041873	416	1856	58	0.03125	0.139423	GO:0001503	GO:BP	ossification	27205	333
Eml6	echinoderm microtubule associated protein like 6 [Source:MGI Symbol;Acc:MGI:2442895]		TRUE	0.000422122	386	1856	55	0.0296336	0.142487	GO:1901214	GO:BP	regulation of neuron death	27205	22269
Emsy	EMSY, BRCA2-interacting transcriptional repressor [Source:MGI Symbol;Acc:MGI:1924203]		TRUE	0.000448194	318	1856	48	0.0258621	0.150943	GO:0006874	GO:BP	intracellular calcium ion homeostasis	27205	2588
Emx2	empty spiracles homeobox 2 [Source:MGI Symbol;Acc:MGI:95388]		TRUE	0.000449567	357	1856	52	0.0280172	0.145658	GO:0007517	GO:BP	muscle organ development	27205	3070
Emx2os	Emx2 opposite strand/antisense transcript (non-protein coding) [Source:MGI Symbol;Acc:MGI:3052329]		TRUE	0.000455771	299	1856	46	0.0247845	0.153846	GO:0072659	GO:BP	protein localization to plasma membrane	27205	18455
Enho	energy homeostasis associated [Source:MGI Symbol;Acc:MGI:1916888]		TRUE	0.000459946	40	1856	14	0.0075431	0.35	GO:0003351	GO:BP	epithelial cilium movement involved in extracellular fluid movement	27205	1801
Enkur	enkurin, TRPC channel interacting protein [Source:MGI Symbol;Acc:MGI:1918483]		TRUE	0.000472004	271	1856	43	0.0231681	0.158672	GO:0071559	GO:BP	response to transforming growth factor beta	27205	17709
Eno1b	enolase 1B, retrotransposed [Source:MGI Symbol;Acc:MGI:3648653]		TRUE	0.000489659	521	1856	68	0.0366379	0.130518	GO:1902532	GO:BP	negative regulation of intracellular signal transduction	27205	23382
Eno1	enolase 1, alpha non-neuron [Source:MGI Symbol;Acc:MGI:95393]		TRUE	0.000509195	93	1856	22	0.0118534	0.236559	GO:0002028	GO:BP	regulation of sodium ion transport	27205	646
Eno4	enolase 4 [Source:MGI Symbol;Acc:MGI:2441717]		TRUE	0.000537583	359	1856	52	0.0280172	0.144847	GO:0048872	GO:BP	homeostasis of number of cells	27205	13855
Enpp2	ectonucleotide pyrophosphatase/phosphodiesterase 2 [Source:MGI Symbol;Acc:MGI:1321390]		TRUE	0.000550694	79	1856	20	0.0107759	0.253165	GO:0040014	GO:BP	regulation of multicellular organism growth	27205	10467
Entpd1	ectonucleoside triphosphate diphosphohydrolase 1 [Source:MGI Symbol;Acc:MGI:102805]		TRUE	0.000563781	35	1856	13	0.00700431	0.371429	GO:0099560	GO:BP	synaptic membrane adhesion	27205	20200
Epc1	enhancer of polycomb homolog 1 [Source:MGI Symbol;Acc:MGI:1278322]		TRUE	0.000581816	273	1856	43	0.0231681	0.157509	GO:0033002	GO:BP	muscle cell proliferation	27205	8400
Epha3	Eph receptor A3 [Source:MGI Symbol;Acc:MGI:99612]		TRUE	0.000591388	400	1856	56	0.0301724	0.14	GO:0032535	GO:BP	regulation of cellular component size	27205	8053
Epha5	Eph receptor A5 [Source:MGI Symbol;Acc:MGI:99654]		TRUE	0.000593503	209	1856	36	0.0193966	0.172249	GO:0008361	GO:BP	regulation of cell size	27205	3254
Ephb3	Eph receptor B3 [Source:MGI Symbol;Acc:MGI:104770]		TRUE	0.000596474	321	1856	48	0.0258621	0.149533	GO:0051402	GO:BP	neuron apoptotic process	27205	14471
Epn2	epsin 2 [Source:MGI Symbol;Acc:MGI:1333766]		TRUE	0.000609971	441	1856	60	0.0323276	0.136054	GO:0006979	GO:BP	response to oxidative stress	27205	2662
Eps15	epidermal growth factor receptor pathway substrate 15 [Source:MGI Symbol;Acc:MGI:104583]		TRUE	0.000624703	841	1856	97	0.0522629	0.115339	GO:0051338	GO:BP	regulation of transferase activity	27205	14434
Eps8	epidermal growth factor receptor pathway substrate 8 [Source:MGI Symbol;Acc:MGI:104684]		TRUE	0.000627774	25	1856	11	0.00592672	0.44	GO:0032291	GO:BP	axon ensheathment in central nervous system	27205	7886
Erbb4	erb-b2 receptor tyrosine kinase 4 [Source:MGI Symbol;Acc:MGI:104771]		TRUE	0.000627774	25	1856	11	0.00592672	0.44	GO:0022010	GO:BP	central nervous system myelination	27205	6925
Ercc6l2	excision repair cross-complementing rodent repair deficiency, complementation group 6 like 2 [Source:MGI Symbol;Acc:MGI:1923501]		TRUE	0.000634808	351	1856	51	0.0274784	0.145299	GO:0070588	GO:BP	calcium ion transmembrane transport	27205	17128
Ergic3	ERGIC and golgi 3 [Source:MGI Symbol;Acc:MGI:1913616]		TRUE	0.000645977	391	1856	55	0.0296336	0.140665	GO:0010038	GO:BP	response to metal ion	27205	3928
Esrrg	estrogen-related receptor gamma [Source:MGI Symbol;Acc:MGI:1347056]		TRUE	0.000653235	133	1856	27	0.0145474	0.203008	GO:0009142	GO:BP	nucleoside triphosphate biosynthetic process	27205	3385
Etnppl	ethanolamine phosphate phospholyase [Source:MGI Symbol;Acc:MGI:1919010]		TRUE	0.000657609	237	1856	39	0.0210129	0.164557	GO:0046777	GO:BP	protein autophosphorylation	27205	13076
Etv4	ets variant 4 [Source:MGI Symbol;Acc:MGI:99423]		TRUE	0.000661765	201	1856	35	0.0188578	0.174129	GO:0008016	GO:BP	regulation of heart contraction	27205	3169
Etv5	ets variant 5 [Source:MGI Symbol;Acc:MGI:1096867]		TRUE	0.000663647	87	1856	21	0.0113147	0.241379	GO:0014015	GO:BP	positive regulation of gliogenesis	27205	4704
Exd1	exonuclease 3'-5' domain containing 1 [Source:MGI Symbol;Acc:MGI:3045306]		TRUE	0.000675424	303	1856	46	0.0247845	0.151815	GO:0007162	GO:BP	negative regulation of cell adhesion	27205	2789
Exoc2	exocyst complex component 2 [Source:MGI Symbol;Acc:MGI:1913732]		TRUE	0.000682079	284	1856	44	0.0237069	0.15493	GO:0009743	GO:BP	response to carbohydrate	27205	3718
Exoc6b	exocyst complex component 6B [Source:MGI Symbol;Acc:MGI:1923164]		TRUE	0.000684299	709	1856	85	0.0457974	0.119887	GO:0071407	GO:BP	cellular response to organic cyclic compound	27205	17605
Ext1	exostosin glycosyltransferase 1 [Source:MGI Symbol;Acc:MGI:894663]		TRUE	0.000702469	392	1856	55	0.0296336	0.140306	GO:0046879	GO:BP	hormone secretion	27205	13133
Extl1	exostosin-like glycosyltransferase 1 [Source:MGI Symbol;Acc:MGI:1888742]		TRUE	0.000733044	167	1856	31	0.0167026	0.185629	GO:0035725	GO:BP	sodium ion transmembrane transport	27205	9702
Extl3	exostosin-like glycosyltransferase 3 [Source:MGI Symbol;Acc:MGI:1860765]		TRUE	0.000746545	266	1856	42	0.0226293	0.157895	GO:0071560	GO:BP	cellular response to transforming growth factor beta stimulus	27205	17710
Eya1	EYA transcriptional coactivator and phosphatase 1 [Source:MGI Symbol;Acc:MGI:109344]		TRUE	0.000753994	766	1856	90	0.0484914	0.117493	GO:0001934	GO:BP	positive regulation of protein phosphorylation	27205	563
Eya4	EYA transcriptional coactivator and phosphatase 4 [Source:MGI Symbol;Acc:MGI:1337104]		TRUE	0.000766038	60	1856	17	0.00915948	0.283333	GO:0010812	GO:BP	negative regulation of cell-substrate adhesion	27205	4528
F2	coagulation factor II [Source:MGI Symbol;Acc:MGI:88380]		TRUE	0.000809216	185	1856	33	0.0177802	0.178378	GO:0021915	GO:BP	neural tube development	27205	6832
F3	coagulation factor III [Source:MGI Symbol;Acc:MGI:88381]		TRUE	0.000816004	88	1856	21	0.0113147	0.238636	GO:0120162	GO:BP	positive regulation of cold-induced thermogenesis	27205	20610
Fabp5	fatty acid binding protein 5, epidermal [Source:MGI Symbol;Acc:MGI:101790]		TRUE	0.000868198	143	1856	28	0.0150862	0.195804	GO:0008286	GO:BP	insulin receptor signaling pathway	27205	3226
Fabp7	fatty acid binding protein 7, brain [Source:MGI Symbol;Acc:MGI:101916]		TRUE	0.000920483	96	1856	22	0.0118534	0.229167	GO:0051492	GO:BP	regulation of stress fiber assembly	27205	14527
Fads2	fatty acid desaturase 2 [Source:MGI Symbol;Acc:MGI:1930079]		TRUE	0.00106775	120	1856	25	0.0134698	0.208333	GO:0061387	GO:BP	regulation of extent of cell growth	27205	16357
Faim2	Fas apoptotic inhibitory molecule 2 [Source:MGI Symbol;Acc:MGI:1919643]		TRUE	0.00106775	120	1856	25	0.0134698	0.208333	GO:0048640	GO:BP	negative regulation of developmental growth	27205	13638
Fam107a	family with sequence similarity 107, member A [Source:MGI Symbol;Acc:MGI:3041256]		TRUE	0.00107735	205	1856	35	0.0188578	0.170732	GO:0071248	GO:BP	cellular response to metal ion	27205	17453
Fam120c	family with sequence similarity 120, member C [Source:MGI Symbol;Acc:MGI:2387687]		TRUE	0.00110005	17	1856	9	0.00484914	0.529412	GO:0061000	GO:BP	negative regulation of dendritic spine development	27205	15995
Hycc2	hyccin PI4KA lipid kinase complex subunit 2 [Source:MGI Symbol;Acc:MGI:1098784]		TRUE	0.00110212	170	1856	31	0.0167026	0.182353	GO:0006694	GO:BP	steroid biosynthetic process	27205	2456
Fam135a	family with sequence similarity 135, member A [Source:MGI Symbol;Acc:MGI:1915437]		TRUE	0.00113422	1024	1856	112	0.0603448	0.109375	GO:0031401	GO:BP	positive regulation of protein modification process	27205	7554
Fam163a	family with sequence similarity 163, member A [Source:MGI Symbol;Acc:MGI:3618859]		TRUE	0.00116008	491	1856	64	0.0344828	0.130346	GO:0045785	GO:BP	positive regulation of cell adhesion	27205	12317
Fam166b	family with sequence similarity 166, member B [Source:MGI Symbol;Acc:MGI:2445194]		TRUE	0.00118647	429	1856	58	0.03125	0.135198	GO:0003012	GO:BP	muscle system process	27205	1482
Fam181b	family with sequence similarity 181, member B [Source:MGI Symbol;Acc:MGI:1930951]		TRUE	0.00119581	37	1856	13	0.00700431	0.351351	GO:0099505	GO:BP	regulation of presynaptic membrane potential	27205	20163
Fam184a	family with sequence similarity 184, member A [Source:MGI Symbol;Acc:MGI:1923156]		TRUE	0.00126098	588	1856	73	0.0393319	0.12415	GO:0043065	GO:BP	positive regulation of apoptotic process	27205	11093
Fam193a	family with sequence homology 193, member A [Source:MGI Symbol;Acc:MGI:2447768]		TRUE	0.00127734	599	1856	74	0.0398707	0.123539	GO:0043068	GO:BP	positive regulation of programmed cell death	27205	11096
Fam193b	family with sequence similarity 193, member B [Source:MGI Symbol;Acc:MGI:2385851]		TRUE	0.00127848	369	1856	52	0.0280172	0.140921	GO:0062012	GO:BP	regulation of small molecule metabolic process	27205	16702
Fam20a	FAM20A, golgi associated secretory pathway pseudokinase [Source:MGI Symbol;Acc:MGI:2388266]		TRUE	0.00127909	43	1856	14	0.0075431	0.325581	GO:0006858	GO:BP	extracellular transport	27205	2578
Atosa	atos homolog A [Source:MGI Symbol;Acc:MGI:2387648]		TRUE	0.00136219	198	1856	34	0.018319	0.171717	GO:0032872	GO:BP	regulation of stress-activated MAPK cascade	27205	8296
Fam216b	family with sequence similarity 216, member B [Source:MGI Symbol;Acc:MGI:2145738]		TRUE	0.00139332	360	1856	51	0.0274784	0.141667	GO:0062197	GO:BP	cellular response to chemical stress	27205	16782
Fam222b	family with sequence similarity 222, member B [Source:MGI Symbol;Acc:MGI:2384939]		TRUE	0.00141685	138	1856	27	0.0145474	0.195652	GO:0010811	GO:BP	positive regulation of cell-substrate adhesion	27205	4527
Fam227b	family with sequence similarity 227, member B [Source:MGI Symbol;Acc:MGI:1923073]		TRUE	0.00152254	217	1856	36	0.0193966	0.165899	GO:0008217	GO:BP	regulation of blood pressure	27205	3216
Fam228a	family with sequence similarity 228, member A [Source:MGI Symbol;Acc:MGI:1922105]		TRUE	0.00153438	22	1856	10	0.00538793	0.454545	GO:0098880	GO:BP	maintenance of postsynaptic specialization structure	27205	19987
Fam228b	family with sequence similarity 228, member B [Source:MGI Symbol;Acc:MGI:2442121]		TRUE	0.00156442	147	1856	28	0.0150862	0.190476	GO:0022612	GO:BP	gland morphogenesis	27205	6981
Far1os	fatty acyl CoA reductase 1, opposite strand [Source:MGI Symbol;Acc:MGI:1916545]		TRUE	0.00160366	264	1856	41	0.0220905	0.155303	GO:0043270	GO:BP	positive regulation of monoatomic ion transport	27205	11182
Farp1	FERM, RhoGEF (Arhgef) and pleckstrin domain protein 1 (chondrocyte-derived) [Source:MGI Symbol;Acc:MGI:2446173]		TRUE	0.00163779	173	1856	31	0.0167026	0.179191	GO:0051494	GO:BP	negative regulation of cytoskeleton organization	27205	14529
Fars2	phenylalanine-tRNA synthetase 2 (mitochondrial) [Source:MGI Symbol;Acc:MGI:1917205]		TRUE	0.00168067	5676	1856	471	0.253772	0.082981	GO:0042221	GO:BP	response to chemical	27205	10621
Fasn	fatty acid synthase [Source:MGI Symbol;Acc:MGI:95485]		TRUE	0.00170344	107	1856	23	0.0123922	0.214953	GO:0034446	GO:BP	substrate adhesion-dependent cell spreading	27205	9098
Fat3	FAT atypical cadherin 3 [Source:MGI Symbol;Acc:MGI:2444314]		TRUE	0.00170456	70	1856	18	0.00969828	0.257143	GO:0061512	GO:BP	protein localization to cilium	27205	16423
Fau	Finkel-Biskis-Reilly murine sarcoma virus (FBR-MuSV) ubiquitously expressed (fox derived) [Source:MGI Symbol;Acc:MGI:102547]		TRUE	0.00172	191	1856	33	0.0177802	0.172775	GO:0043405	GO:BP	regulation of MAP kinase activity	27205	11263
Fbln5	fibulin 5 [Source:MGI Symbol;Acc:MGI:1346091]		TRUE	0.00175317	284	1856	43	0.0231681	0.151408	GO:0030522	GO:BP	intracellular receptor signaling pathway	27205	7201
Fbrsl1	fibrosin-like 1 [Source:MGI Symbol;Acc:MGI:1920907]		TRUE	0.00178917	165	1856	30	0.0161638	0.181818	GO:0051017	GO:BP	actin filament bundle assembly	27205	14199
Fbxl17	F-box and leucine-rich repeat protein 17 [Source:MGI Symbol;Acc:MGI:1354704]		TRUE	0.00190742	140	1856	27	0.0145474	0.192857	GO:0032355	GO:BP	response to estradiol	27205	7934
Fbxl20	F-box and leucine-rich repeat protein 20 [Source:MGI Symbol;Acc:MGI:1919444]		TRUE	0.00193753	210	1856	35	0.0188578	0.166667	GO:0009152	GO:BP	purine ribonucleotide biosynthetic process	27205	3395
Fbxo2	F-box protein 2 [Source:MGI Symbol;Acc:MGI:2446216]		TRUE	0.00194956	201	1856	34	0.018319	0.169154	GO:0070302	GO:BP	regulation of stress-activated protein kinase signaling cascade	27205	16973
Fbxw4	F-box and WD-40 domain protein 4 [Source:MGI Symbol;Acc:MGI:1354698]		TRUE	0.00195893	354	1856	50	0.0269397	0.141243	GO:0072001	GO:BP	renal system development	27205	18005
Fdft1	farnesyl diphosphate farnesyl transferase 1 [Source:MGI Symbol;Acc:MGI:102706]		TRUE	0.00197952	772	1856	89	0.0479526	0.115285	GO:0071396	GO:BP	cellular response to lipid	27205	17594
Fez1	fasciculation and elongation protein zeta 1 (zygin I) [Source:MGI Symbol;Acc:MGI:2670976]		TRUE	0.00201278	520	1856	66	0.0355603	0.126923	GO:0048732	GO:BP	gland development	27205	13729
Fgd4	FYVE, RhoGEF and PH domain containing 4 [Source:MGI Symbol;Acc:MGI:2183747]		TRUE	0.00201758	238	1856	38	0.0204741	0.159664	GO:0032869	GO:BP	cellular response to insulin stimulus	27205	8293
Fgd6	FYVE, RhoGEF and PH domain containing 6 [Source:MGI Symbol;Acc:MGI:1261419]		TRUE	0.00202588	108	1856	23	0.0123922	0.212963	GO:0110020	GO:BP	regulation of actomyosin structure organization	27205	20425
Fgf1	fibroblast growth factor 1 [Source:MGI Symbol;Acc:MGI:95515]		TRUE	0.00205616	116	1856	24	0.012931	0.206897	GO:0031532	GO:BP	actin cytoskeleton reorganization	27205	7598
Fgf10	fibroblast growth factor 10 [Source:MGI Symbol;Acc:MGI:1099809]		TRUE	0.0021009	64	1856	17	0.00915948	0.265625	GO:0032922	GO:BP	circadian regulation of gene expression	27205	8341
Fgf12	fibroblast growth factor 12 [Source:MGI Symbol;Acc:MGI:109183]		TRUE	0.0021009	64	1856	17	0.00915948	0.265625	GO:0019098	GO:BP	reproductive behavior	27205	5880
Fgf13	fibroblast growth factor 13 [Source:MGI Symbol;Acc:MGI:109178]		TRUE	0.00217975	93	1856	21	0.0113147	0.225806	GO:0048814	GO:BP	regulation of dendrite morphogenesis	27205	13800
Fgf14	fibroblast growth factor 14 [Source:MGI Symbol;Acc:MGI:109189]		TRUE	0.00221682	51	1856	15	0.0080819	0.294118	GO:0021587	GO:BP	cerebellum morphogenesis	27205	6520
Fgf20	fibroblast growth factor 20 [Source:MGI Symbol;Acc:MGI:1891346]		TRUE	0.00227642	316	1856	46	0.0247845	0.14557	GO:0048562	GO:BP	embryonic organ morphogenesis	27205	13573
Fgfr3	fibroblast growth factor receptor 3 [Source:MGI Symbol;Acc:MGI:95524]		TRUE	0.00232091	230	1856	37	0.0199353	0.16087	GO:0030324	GO:BP	lung development	27205	7136
Fggy	FGGY carbohydrate kinase domain containing [Source:MGI Symbol;Acc:MGI:1922828]		TRUE	0.00232994	167	1856	30	0.0161638	0.179641	GO:0010970	GO:BP	transport along microtubule	27205	4660
Fhad1	forkhead-associated (FHA) phosphopeptide binding domain 1 [Source:MGI Symbol;Acc:MGI:1920323]		TRUE	0.00238535	221	1856	36	0.0193966	0.162896	GO:0001649	GO:BP	osteoblast differentiation	27205	381
Fibp	fibroblast growth factor (acidic) intracellular binding protein [Source:MGI Symbol;Acc:MGI:1926233]		TRUE	0.00242106	117	1856	24	0.012931	0.205128	GO:0045446	GO:BP	endothelial cell differentiation	27205	12078
Filip1l	filamin A interacting protein 1-like [Source:MGI Symbol;Acc:MGI:1925999]		TRUE	0.00252079	58	1856	16	0.00862069	0.275862	GO:0051489	GO:BP	regulation of filopodium assembly	27205	14524
Firre	functional intergenic repeating RNA element [Source:MGI Symbol;Acc:MGI:2147989]		TRUE	0.00263956	269	1856	41	0.0220905	0.152416	GO:0003007	GO:BP	heart morphogenesis	27205	1477
Fis1	fission, mitochondrial 1 [Source:MGI Symbol;Acc:MGI:1913687]		TRUE	0.00265364	168	1856	30	0.0161638	0.178571	GO:0061572	GO:BP	actin filament bundle organization	27205	16474
Fjx1	four jointed box 1 [Source:MGI Symbol;Acc:MGI:1341907]		TRUE	0.00266505	65	1856	17	0.00915948	0.261538	GO:0050885	GO:BP	neuromuscular process controlling balance	27205	14082
Flrt1	fibronectin leucine rich transmembrane protein 1 [Source:MGI Symbol;Acc:MGI:3026647]		TRUE	0.00272184	318	1856	46	0.0247845	0.144654	GO:0051146	GO:BP	striated muscle cell differentiation	27205	14291
Flrt2	fibronectin leucine rich transmembrane protein 2 [Source:MGI Symbol;Acc:MGI:3603594]		TRUE	0.00274471	328	1856	47	0.0253233	0.143293	GO:0046883	GO:BP	regulation of hormone secretion	27205	13137
Fmc1	formation of mitochondrial complex V assembly factor 1 [Source:MGI Symbol;Acc:MGI:1913367]		TRUE	0.00274851	151	1856	28	0.0150862	0.18543	GO:0001508	GO:BP	action potential	27205	337
Fmn2	formin 2 [Source:MGI Symbol;Acc:MGI:1859252]		TRUE	0.0028364	579	1856	71	0.0382543	0.122625	GO:0051640	GO:BP	organelle localization	27205	14641
Fmo1	flavin containing monooxygenase 1 [Source:MGI Symbol;Acc:MGI:1310002]		TRUE	0.0028368	1425	1856	144	0.0775862	0.101053	GO:0044248	GO:BP	cellular catabolic process	27205	11576
Fnbp1	formin binding protein 1 [Source:MGI Symbol;Acc:MGI:109606]		TRUE	0.0028444	110	1856	23	0.0123922	0.209091	GO:0055017	GO:BP	cardiac muscle tissue growth	27205	15036
Fnbp4	formin binding protein 4 [Source:MGI Symbol;Acc:MGI:1860513]		TRUE	0.00291968	52	1856	15	0.0080819	0.288462	GO:0051602	GO:BP	response to electrical stimulus	27205	14607
Fndc5	fibronectin type III domain containing 5 [Source:MGI Symbol;Acc:MGI:1917614]		TRUE	0.00293363	251	1856	39	0.0210129	0.155378	GO:0060249	GO:BP	anatomical structure homeostasis	27205	15299
Fos	FBJ osteosarcoma oncogene [Source:MGI Symbol;Acc:MGI:95574]		TRUE	0.00293363	251	1856	39	0.0210129	0.155378	GO:0001894	GO:BP	tissue homeostasis	27205	534
Fosb	FBJ osteosarcoma oncogene B [Source:MGI Symbol;Acc:MGI:95575]		TRUE	0.00315122	380	1856	52	0.0280172	0.136842	GO:0050900	GO:BP	leukocyte migration	27205	14095
Foxa1	forkhead box A1 [Source:MGI Symbol;Acc:MGI:1347472]		TRUE	0.00316234	442	1856	58	0.03125	0.131222	GO:0033674	GO:BP	positive regulation of kinase activity	27205	8787
Foxd2os	forkhead box D2, opposite strand [Source:MGI Symbol;Acc:MGI:2444065]		TRUE	0.00319767	233	1856	37	0.0199353	0.158798	GO:0030323	GO:BP	respiratory tube development	27205	7135
Foxg1	forkhead box G1 [Source:MGI Symbol;Acc:MGI:1347464]		TRUE	0.00321481	310	1856	45	0.0242457	0.145161	GO:0042593	GO:BP	glucose homeostasis	27205	10829
Foxn3	forkhead box N3 [Source:MGI Symbol;Acc:MGI:1918625]		TRUE	0.00321481	310	1856	45	0.0242457	0.145161	GO:0033500	GO:BP	carbohydrate homeostasis	27205	8678
Foxo1	forkhead box O1 [Source:MGI Symbol;Acc:MGI:1890077]		TRUE	0.00330378	103	1856	22	0.0118534	0.213592	GO:0046889	GO:BP	positive regulation of lipid biosynthetic process	27205	13143
Foxp1	forkhead box P1 [Source:MGI Symbol;Acc:MGI:1914004]		TRUE	0.00332933	40	1856	13	0.00700431	0.325	GO:1905606	GO:BP	regulation of presynapse assembly	27205	25976
Frem1	Fras1 related extracellular matrix protein 1 [Source:MGI Symbol;Acc:MGI:2670972]		TRUE	0.00347372	206	1856	34	0.018319	0.165049	GO:0035265	GO:BP	organ growth	27205	9412
Frmd4a	FERM domain containing 4A [Source:MGI Symbol;Acc:MGI:1919850]		TRUE	0.00353104	88	1856	20	0.0107759	0.227273	GO:0008593	GO:BP	regulation of Notch signaling pathway	27205	3277
Frmpd1	FERM and PDZ domain containing 1 [Source:MGI Symbol;Acc:MGI:2446274]		TRUE	0.0036854	225	1856	36	0.0193966	0.16	GO:0009260	GO:BP	ribonucleotide biosynthetic process	27205	3501
Frmpd2	FERM and PDZ domain containing 2 [Source:MGI Symbol;Acc:MGI:2685472]		TRUE	0.00368743	19	1856	9	0.00484914	0.473684	GO:0098696	GO:BP	regulation of neurotransmitter receptor localization to postsynaptic specialization membrane	27205	19881
Fry	FRY microtubule binding protein [Source:MGI Symbol;Acc:MGI:2443895]		TRUE	0.00377609	29	1856	11	0.00592672	0.37931	GO:1902473	GO:BP	regulation of protein localization to synapse	27205	23344
Fryl	FRY like transcription coactivator [Source:MGI Symbol;Acc:MGI:1919563]		TRUE	0.00390175	120	1856	24	0.012931	0.2	GO:0008306	GO:BP	associative learning	27205	3235
Frzb	frizzled-related protein [Source:MGI Symbol;Acc:MGI:892032]		TRUE	0.003956	112	1856	23	0.0123922	0.205357	GO:0030038	GO:BP	contractile actin filament bundle assembly	27205	7024
Fstl1	follistatin-like 1 [Source:MGI Symbol;Acc:MGI:102793]		TRUE	0.003956	112	1856	23	0.0123922	0.205357	GO:0030518	GO:BP	intracellular steroid hormone receptor signaling pathway	27205	7198
Fstl4	follistatin-like 4 [Source:MGI Symbol;Acc:MGI:2443199]		TRUE	0.003956	112	1856	23	0.0123922	0.205357	GO:0043149	GO:BP	stress fiber assembly	27205	11140
Fth1	ferritin heavy polypeptide 1 [Source:MGI Symbol;Acc:MGI:95588]		TRUE	0.00414053	60	1856	16	0.00862069	0.266667	GO:0098815	GO:BP	modulation of excitatory postsynaptic potential	27205	19959
Ftl1	ferritin light polypeptide 1 [Source:MGI Symbol;Acc:MGI:95589]		TRUE	0.00415971	137	1856	26	0.0140086	0.189781	GO:0030177	GO:BP	positive regulation of Wnt signaling pathway	27205	7060
Ftl1-ps1	ferritin light polypeptide 1, pseudogene 1 [Source:MGI Symbol;Acc:MGI:3779109]		TRUE	0.00437397	236	1856	37	0.0199353	0.15678	GO:0048762	GO:BP	mesenchymal cell differentiation	27205	13753
Ftx	Ftx transcript, Xist regulator (non-protein coding) [Source:MGI Symbol;Acc:MGI:1926128]		TRUE	0.00437397	236	1856	37	0.0199353	0.15678	GO:0050920	GO:BP	regulation of chemotaxis	27205	14115
Fut8	fucosyltransferase 8 [Source:MGI Symbol;Acc:MGI:1858901]		TRUE	0.00438549	129	1856	25	0.0134698	0.193798	GO:0042471	GO:BP	ear morphogenesis	27205	10779
Fut9	fucosyltransferase 9 [Source:MGI Symbol;Acc:MGI:1330859]		TRUE	0.0044262	199	1856	33	0.0177802	0.165829	GO:0035264	GO:BP	multicellular organism growth	27205	9411
Fxyd1	FXYD domain-containing ion transport regulator 1 [Source:MGI Symbol;Acc:MGI:1889273]		TRUE	0.00444682	35	1856	12	0.00646552	0.342857	GO:0045686	GO:BP	negative regulation of glial cell differentiation	27205	12234
Fzd10	frizzled class receptor 10 [Source:MGI Symbol;Acc:MGI:2136761]		TRUE	0.00453985	447	1856	58	0.03125	0.129754	GO:0022411	GO:BP	cellular component disassembly	27205	6964
Fzd10os	frizzled class receptor 10, opposite strand [Source:MGI Symbol;Acc:MGI:2442398]		TRUE	0.00479644	138	1856	26	0.0140086	0.188406	GO:0048675	GO:BP	axon extension	27205	13673
Fzd2	frizzled class receptor 2 [Source:MGI Symbol;Acc:MGI:1888513]		TRUE	0.00495212	54	1856	15	0.0080819	0.277778	GO:0021575	GO:BP	hindbrain morphogenesis	27205	6508
Fzd4	frizzled class receptor 4 [Source:MGI Symbol;Acc:MGI:108520]		TRUE	0.00499057	173	1856	30	0.0161638	0.17341	GO:0001539	GO:BP	cilium or flagellum-dependent cell motility	27205	345
G0s2	G0/G1 switch gene 2 [Source:MGI Symbol;Acc:MGI:1316737]		TRUE	0.00499057	173	1856	30	0.0161638	0.17341	GO:0060285	GO:BP	cilium-dependent cell motility	27205	15334
Gab2	growth factor receptor bound protein 2-associated protein 2 [Source:MGI Symbol;Acc:MGI:1333854]		TRUE	0.00501043	266	1856	40	0.0215517	0.150376	GO:0032886	GO:BP	regulation of microtubule-based process	27205	8310
Gabarapl2	gamma-aminobutyric acid (GABA) A receptor-associated protein-like 2 [Source:MGI Symbol;Acc:MGI:1890602]		TRUE	0.00513439	90	1856	20	0.0107759	0.222222	GO:1901379	GO:BP	regulation of potassium ion transmembrane transport	27205	22401
Gabbr1	gamma-aminobutyric acid (GABA) B receptor, 1 [Source:MGI Symbol;Acc:MGI:1860139]		TRUE	0.00525903	61	1856	16	0.00862069	0.262295	GO:0001736	GO:BP	establishment of planar polarity	27205	426
Gabbr2	gamma-aminobutyric acid (GABA) B receptor, 2 [Source:MGI Symbol;Acc:MGI:2386030]		TRUE	0.0053256	257	1856	39	0.0210129	0.151751	GO:0045926	GO:BP	negative regulation of growth	27205	12422
Gabra2	gamma-aminobutyric acid (GABA) A receptor, subunit alpha 2 [Source:MGI Symbol;Acc:MGI:95614]		TRUE	0.00554691	165	1856	29	0.015625	0.175758	GO:0072006	GO:BP	nephron development	27205	18010
Gabrb1	gamma-aminobutyric acid (GABA) A receptor, subunit beta 1 [Source:MGI Symbol;Acc:MGI:95619]		TRUE	0.00568654	482	1856	61	0.0328664	0.126556	GO:0022407	GO:BP	regulation of cell-cell adhesion	27205	6960
Gabrg1	gamma-aminobutyric acid (GABA) A receptor, subunit gamma 1 [Source:MGI Symbol;Acc:MGI:103156]		TRUE	0.0057864	536	1856	66	0.0355603	0.123134	GO:0051347	GO:BP	positive regulation of transferase activity	27205	14443
Gabrg3	gamma-aminobutyric acid (GABA) A receptor, subunit gamma 3 [Source:MGI Symbol;Acc:MGI:95624]		TRUE	0.00594117	239	1856	37	0.0199353	0.154812	GO:0097529	GO:BP	myeloid leukocyte migration	27205	19735
Gadd45g	growth arrest and DNA-damage-inducible 45 gamma [Source:MGI Symbol;Acc:MGI:1346325]		TRUE	0.0061235	157	1856	28	0.0150862	0.178344	GO:0034614	GO:BP	cellular response to reactive oxygen species	27205	9151
Galnt10	polypeptide N-acetylgalactosaminyltransferase 10 [Source:MGI Symbol;Acc:MGI:1890480]		TRUE	0.00617502	658	1856	77	0.0414871	0.117021	GO:0002521	GO:BP	leukocyte differentiation	27205	1061
Galnt16	polypeptide N-acetylgalactosaminyltransferase 16 [Source:MGI Symbol;Acc:MGI:1917754]		TRUE	0.00637964	115	1856	23	0.0123922	0.2	GO:0003279	GO:BP	cardiac septum development	27205	1731
Galnt18	polypeptide N-acetylgalactosaminyltransferase 18 [Source:MGI Symbol;Acc:MGI:2446239]		TRUE	0.00641608	25	1856	10	0.00538793	0.4	GO:0098974	GO:BP	postsynaptic actin cytoskeleton organization	27205	20046
Galnt2	polypeptide N-acetylgalactosaminyltransferase 2 [Source:MGI Symbol;Acc:MGI:894694]		TRUE	0.00655433	69	1856	17	0.00915948	0.246377	GO:0019646	GO:BP	aerobic electron transport chain	27205	6286
Gapdh	glyceraldehyde-3-phosphate dehydrogenase [Source:MGI Symbol;Acc:MGI:95640]		TRUE	0.0066417	62	1856	16	0.00862069	0.258065	GO:0007164	GO:BP	establishment of tissue polarity	27205	2791
Garem1	GRB2 associated regulator of MAPK1 subtype 1 [Source:MGI Symbol;Acc:MGI:2685790]		TRUE	0.00678632	132	1856	25	0.0134698	0.189394	GO:0007266	GO:BP	Rho protein signal transduction	27205	2863
Gas1	growth arrest specific 1 [Source:MGI Symbol;Acc:MGI:95655]		TRUE	0.00749563	213	1856	34	0.018319	0.159624	GO:0051048	GO:BP	negative regulation of secretion	27205	14218
Gas5	growth arrest specific 5 [Source:MGI Symbol;Acc:MGI:95659]		TRUE	0.00764274	232	1856	36	0.0193966	0.155172	GO:0046390	GO:BP	ribose phosphate biosynthetic process	27205	12823
Gbf1	golgi-specific brefeldin A-resistance factor 1 [Source:MGI Symbol;Acc:MGI:1861607]		TRUE	0.00787238	902	1856	98	0.0528017	0.108647	GO:0061024	GO:BP	membrane organization	27205	16012
Gcnt4	glucosaminyl (N-acetyl) transferase 4, core 2 (beta-1,6-N-acetylglucosaminyltransferase) [Source:MGI Symbol;Acc:MGI:2684919]		TRUE	0.00801506	242	1856	37	0.0199353	0.152893	GO:0009749	GO:BP	response to glucose	27205	3724
Gcnt7	glucosaminyl (N-acetyl) transferase family member 7 [Source:MGI Symbol;Acc:MGI:3606143]		TRUE	0.00813707	31	1856	11	0.00592672	0.354839	GO:0140058	GO:BP	neuron projection arborization	27205	20740
Gfap	glial fibrillary acidic protein [Source:MGI Symbol;Acc:MGI:95697]		TRUE	0.00816882	281	1856	41	0.0220905	0.145907	GO:0043523	GO:BP	regulation of neuron apoptotic process	27205	11343
Gh	growth hormone [Source:MGI Symbol;Acc:MGI:95707]		TRUE	0.00834201	63	1856	16	0.00862069	0.253968	GO:0016126	GO:BP	sterol biosynthetic process	27205	5268
Ghr	growth hormone receptor [Source:MGI Symbol;Acc:MGI:95708]		TRUE	0.00834348	43	1856	13	0.00700431	0.302326	GO:0021696	GO:BP	cerebellar cortex morphogenesis	27205	6628
Gigyf1	GRB10 interacting GYF protein 1 [Source:MGI Symbol;Acc:MGI:1888677]		TRUE	0.00834348	43	1856	13	0.00700431	0.302326	GO:0099174	GO:BP	regulation of presynapse organization	27205	20144
Gja1	gap junction protein, alpha 1 [Source:MGI Symbol;Acc:MGI:95713]		TRUE	0.00868574	37	1856	12	0.00646552	0.324324	GO:0045879	GO:BP	negative regulation of smoothened signaling pathway	27205	12385
Gjb6	gap junction protein, beta 6 [Source:MGI Symbol;Acc:MGI:107588]		TRUE	0.00879599	93	1856	20	0.0107759	0.215054	GO:0045685	GO:BP	regulation of glial cell differentiation	27205	12233
Gjc3	gap junction protein, gamma 3 [Source:MGI Symbol;Acc:MGI:2153041]		TRUE	0.00885118	521	1856	64	0.0344828	0.122841	GO:0009896	GO:BP	positive regulation of catabolic process	27205	3834
Gk	glycerol kinase [Source:MGI Symbol;Acc:MGI:106594]		TRUE	0.00887092	342	1856	47	0.0253233	0.137427	GO:0001822	GO:BP	kidney development	27205	493
Gle1	GLE1 RNA export mediator (yeast) [Source:MGI Symbol;Acc:MGI:1921662]		TRUE	0.00891884	109	1856	22	0.0118534	0.201835	GO:0043266	GO:BP	regulation of potassium ion transport	27205	11178
Glg1	golgi apparatus protein 1 [Source:MGI Symbol;Acc:MGI:104967]		TRUE	0.00895396	755	1856	85	0.0457974	0.112583	GO:0030162	GO:BP	regulation of proteolysis	27205	7053
Gli1	GLI-Kruppel family member GLI1 [Source:MGI Symbol;Acc:MGI:95727]		TRUE	0.00989174	1805	1856	172	0.0926724	0.0952909	GO:0000003	GO:BP	reproduction	27205	3
Gli2	GLI-Kruppel family member GLI2 [Source:MGI Symbol;Acc:MGI:95728]		TRUE	0.0100161	1060	1856	111	0.059806	0.104717	GO:0032101	GO:BP	regulation of response to external stimulus	27205	7777
Gli3	GLI-Kruppel family member GLI3 [Source:MGI Symbol;Acc:MGI:95729]		TRUE	0.0103516	21	1856	9	0.00484914	0.428571	GO:0031290	GO:BP	retinal ganglion cell axon guidance	27205	7499
Glis1	GLIS family zinc finger 1 [Source:MGI Symbol;Acc:MGI:2386723]		TRUE	0.0103516	21	1856	9	0.00484914	0.428571	GO:0043116	GO:BP	negative regulation of vascular permeability	27205	11123
Glmp	glycosylated lysosomal membrane protein [Source:MGI Symbol;Acc:MGI:1913318]		TRUE	0.0103907	57	1856	15	0.0080819	0.263158	GO:0006695	GO:BP	cholesterol biosynthetic process	27205	2457
Glrb	glycine receptor, beta subunit [Source:MGI Symbol;Acc:MGI:95751]		TRUE	0.0103907	57	1856	15	0.0080819	0.263158	GO:0035176	GO:BP	social behavior	27205	9350
Glt8d1	glycosyltransferase 8 domain containing 1 [Source:MGI Symbol;Acc:MGI:1923735]		TRUE	0.0103907	57	1856	15	0.0080819	0.263158	GO:1902653	GO:BP	secondary alcohol biosynthetic process	27205	23466
Glul	glutamate-ammonia ligase (glutamine synthetase) [Source:MGI Symbol;Acc:MGI:95739]		TRUE	0.0104631	94	1856	20	0.0107759	0.212766	GO:0021954	GO:BP	central nervous system neuron development	27205	6869
Gnao1	guanine nucleotide binding protein, alpha O [Source:MGI Symbol;Acc:MGI:95775]		TRUE	0.0107202	612	1856	72	0.0387931	0.117647	GO:0045859	GO:BP	regulation of protein kinase activity	27205	12373
Gnaq	guanine nucleotide binding protein, alpha q polypeptide [Source:MGI Symbol;Acc:MGI:95776]		TRUE	0.0110555	355	1856	48	0.0258621	0.135211	GO:0050878	GO:BP	regulation of body fluid levels	27205	14076
Gnas	GNAS (guanine nucleotide binding protein, alpha stimulating) complex locus [Source:MGI Symbol;Acc:MGI:95777]		TRUE	0.0110829	255	1856	38	0.0204741	0.14902	GO:0090257	GO:BP	regulation of muscle system process	27205	19166
Gng5	G protein subunit gamma 5 [Source:MGI Symbol;Acc:MGI:109164]		TRUE	0.0116355	32	1856	11	0.00592672	0.34375	GO:0048169	GO:BP	regulation of long-term neuronal synaptic plasticity	27205	13299
Golga4	golgi autoantigen, golgin subfamily a, 4 [Source:MGI Symbol;Acc:MGI:1859646]		TRUE	0.0116907	315	1856	44	0.0237069	0.139683	GO:0009101	GO:BP	glycoprotein biosynthetic process	27205	3349
Gpam	glycerol-3-phosphate acyltransferase, mitochondrial [Source:MGI Symbol;Acc:MGI:109162]		TRUE	0.0117105	119	1856	23	0.0123922	0.193277	GO:0060419	GO:BP	heart growth	27205	15456
Gpatch2	G patch domain containing 2 [Source:MGI Symbol;Acc:MGI:1915019]		TRUE	0.0117105	119	1856	23	0.0123922	0.193277	GO:2000177	GO:BP	regulation of neural precursor cell proliferation	27205	26777
Gpc3	glypican 3 [Source:MGI Symbol;Acc:MGI:104903]		TRUE	0.0121873	111	1856	22	0.0118534	0.198198	GO:0010595	GO:BP	positive regulation of endothelial cell migration	27205	4339
Gpc5	glypican 5 [Source:MGI Symbol;Acc:MGI:1194894]		TRUE	0.0121873	111	1856	22	0.0118534	0.198198	GO:0032024	GO:BP	positive regulation of insulin secretion	27205	7730
Gpc6	glypican 6 [Source:MGI Symbol;Acc:MGI:1346322]		TRUE	0.012252	72	1856	17	0.00915948	0.236111	GO:1902017	GO:BP	regulation of cilium assembly	27205	22964
Gpcpd1	glycerophosphocholine phosphodiesterase 1 [Source:MGI Symbol;Acc:MGI:104898]		TRUE	0.012252	72	1856	17	0.00915948	0.236111	GO:0061614	GO:BP	miRNA transcription	27205	16494
Gpd2	glycerol phosphate dehydrogenase 2, mitochondrial [Source:MGI Symbol;Acc:MGI:99778]		TRUE	0.0123377	1354	1856	135	0.0727371	0.0997046	GO:1901565	GO:BP	organonitrogen compound catabolic process	27205	22564
Gphn	gephyrin [Source:MGI Symbol;Acc:MGI:109602]		TRUE	0.013136	58	1856	15	0.0080819	0.258621	GO:0061001	GO:BP	regulation of dendritic spine morphogenesis	27205	15996
Gpld1	glycosylphosphatidylinositol specific phospholipase D1 [Source:MGI Symbol;Acc:MGI:106604]		TRUE	0.013361	257	1856	38	0.0204741	0.14786	GO:0034284	GO:BP	response to monosaccharide	27205	8990
Gpm6a	glycoprotein m6a [Source:MGI Symbol;Acc:MGI:107671]		TRUE	0.0138035	277	1856	40	0.0215517	0.144404	GO:0014706	GO:BP	striated muscle tissue development	27205	4763
Gpr141	G protein-coupled receptor 141 [Source:MGI Symbol;Acc:MGI:2672983]		TRUE	0.0143024	248	1856	37	0.0199353	0.149194	GO:0009746	GO:BP	response to hexose	27205	3721
Gpr146	G protein-coupled receptor 146 [Source:MGI Symbol;Acc:MGI:1933113]		TRUE	0.0144431	182	1856	30	0.0161638	0.164835	GO:0050714	GO:BP	positive regulation of protein secretion	27205	13969
Gpr153	G protein-coupled receptor 153 [Source:MGI Symbol;Acc:MGI:1916157]		TRUE	0.0146443	45	1856	13	0.00700431	0.288889	GO:0120163	GO:BP	negative regulation of cold-induced thermogenesis	27205	20611
Gpr155	G protein-coupled receptor 155 [Source:MGI Symbol;Acc:MGI:1915776]		TRUE	0.0152547	201	1856	32	0.0172414	0.159204	GO:0009060	GO:BP	aerobic respiration	27205	3312
Gpr158	G protein-coupled receptor 158 [Source:MGI Symbol;Acc:MGI:2441697]		TRUE	0.0153159	17	1856	8	0.00431034	0.470588	GO:1900452	GO:BP	regulation of long-term synaptic depression	27205	21610
Gpr162	G protein-coupled receptor 162 [Source:MGI Symbol;Acc:MGI:1315214]		TRUE	0.0161365	52	1856	14	0.0075431	0.269231	GO:0021795	GO:BP	cerebral cortex cell migration	27205	6723
Gpr37	G protein-coupled receptor 37 [Source:MGI Symbol;Acc:MGI:1313297]		TRUE	0.0163696	423	1856	54	0.0290948	0.12766	GO:0006091	GO:BP	generation of precursor metabolites and energy	27205	1998
Gpr37l1	G protein-coupled receptor 37-like 1 [Source:MGI Symbol;Acc:MGI:1928503]		TRUE	0.0163785	33	1856	11	0.00592672	0.333333	GO:0150117	GO:BP	positive regulation of cell-substrate junction organization	27205	21132
Gprasp1	G protein-coupled receptor associated sorting protein 1 [Source:MGI Symbol;Acc:MGI:1917418]		TRUE	0.0165083	113	1856	22	0.0118534	0.19469	GO:0033555	GO:BP	multicellular organismal response to stress	27205	8725
Gprasp2	G protein-coupled receptor associated sorting protein 2 [Source:MGI Symbol;Acc:MGI:2442071]		TRUE	0.0165094	59	1856	15	0.0080819	0.254237	GO:1900024	GO:BP	regulation of substrate adhesion-dependent cell spreading	27205	21242
Gprc5b	G protein-coupled receptor, family C, group 5, member B [Source:MGI Symbol;Acc:MGI:1927596]		TRUE	0.0165094	59	1856	15	0.0080819	0.254237	GO:0042596	GO:BP	fear response	27205	10832
Gpx1	glutathione peroxidase 1 [Source:MGI Symbol;Acc:MGI:104887]		TRUE	0.0167175	9	1856	6	0.00323276	0.666667	GO:1900454	GO:BP	positive regulation of long-term synaptic depression	27205	21612
Gramd1b	GRAM domain containing 1B [Source:MGI Symbol;Acc:MGI:1925037]		TRUE	0.0170112	371	1856	49	0.0264009	0.132075	GO:0010639	GO:BP	negative regulation of organelle organization	27205	4381
Gramd3	GRAM domain containing 3 [Source:MGI Symbol;Acc:MGI:1914815]		TRUE	0.0177409	1798	1856	170	0.0915948	0.0945495	GO:0022414	GO:BP	reproductive process	27205	6967
Gramd4	GRAM domain containing 4 [Source:MGI Symbol;Acc:MGI:2676308]		TRUE	0.0180845	122	1856	23	0.0123922	0.188525	GO:0018210	GO:BP	peptidyl-threonine modification	27205	5573
Grcc10	gene rich cluster, C10 gene [Source:MGI Symbol;Acc:MGI:1315201]		TRUE	0.0185532	157	1856	27	0.0145474	0.171975	GO:0051592	GO:BP	response to calcium ion	27205	14597
Gria1	glutamate receptor, ionotropic, AMPA1 (alpha 1) [Source:MGI Symbol;Acc:MGI:95808]		TRUE	0.0185936	166	1856	28	0.0150862	0.168675	GO:0048015	GO:BP	phosphatidylinositol-mediated signaling	27205	13203
Gria2	glutamate receptor, ionotropic, AMPA2 (alpha 2) [Source:MGI Symbol;Acc:MGI:95809]		TRUE	0.0191433	46	1856	13	0.00700431	0.282609	GO:0008038	GO:BP	neuron recognition	27205	3172
Gria4	glutamate receptor, ionotropic, AMPA4 (alpha 4) [Source:MGI Symbol;Acc:MGI:95811]		TRUE	0.0191433	46	1856	13	0.00700431	0.282609	GO:0007157	GO:BP	heterophilic cell-cell adhesion via plasma membrane cell adhesion molecules	27205	2784
Grid1	glutamate receptor, ionotropic, delta 1 [Source:MGI Symbol;Acc:MGI:95812]		TRUE	0.0196117	82	1856	18	0.00969828	0.219512	GO:0042775	GO:BP	mitochondrial ATP synthesis coupled electron transport	27205	10937
Grid2	glutamate receptor, ionotropic, delta 2 [Source:MGI Symbol;Acc:MGI:95813]		TRUE	0.0196746	232	1856	35	0.0188578	0.150862	GO:0050679	GO:BP	positive regulation of epithelial cell proliferation	27205	13957
Grik2	glutamate receptor, ionotropic, kainate 2 (beta 2) [Source:MGI Symbol;Acc:MGI:95815]		TRUE	0.0198737	668	1856	76	0.0409483	0.113772	GO:0043086	GO:BP	negative regulation of catalytic activity	27205	11101
Grik4	glutamate receptor, ionotropic, kainate 4 [Source:MGI Symbol;Acc:MGI:95817]		TRUE	0.0199537	106	1856	21	0.0113147	0.198113	GO:0042472	GO:BP	inner ear morphogenesis	27205	10780
Grik5	glutamate receptor, ionotropic, kainate 5 (gamma 2) [Source:MGI Symbol;Acc:MGI:95818]		TRUE	0.0202832	242	1856	36	0.0193966	0.14876	GO:0002064	GO:BP	epithelial cell development	27205	672
Grin2b	glutamate receptor, ionotropic, NMDA2B (epsilon 2) [Source:MGI Symbol;Acc:MGI:95821]		TRUE	0.0205591	53	1856	14	0.0075431	0.264151	GO:2000649	GO:BP	regulation of sodium ion transmembrane transporter activity	27205	27209
Grin2c	glutamate receptor, ionotropic, NMDA2C (epsilon 3) [Source:MGI Symbol;Acc:MGI:95822]		TRUE	0.0206324	60	1856	15	0.0080819	0.25	GO:0042551	GO:BP	neuron maturation	27205	10818
Grin3a	glutamate receptor ionotropic, NMDA3A [Source:MGI Symbol;Acc:MGI:1933206]		TRUE	0.0206324	60	1856	15	0.0080819	0.25	GO:0051703	GO:BP	biological process involved in intraspecies interaction between organisms	27205	14691
Grip1	glutamate receptor interacting protein 1 [Source:MGI Symbol;Acc:MGI:1921303]		TRUE	0.0208707	703	1856	79	0.0425647	0.112376	GO:0008285	GO:BP	negative regulation of cell population proliferation	27205	3225
Grk3	G protein-coupled receptor kinase 3 [Source:MGI Symbol;Acc:MGI:87941]		TRUE	0.0209418	158	1856	27	0.0145474	0.170886	GO:0070507	GO:BP	regulation of microtubule cytoskeleton organization	27205	17092
Grk4	G protein-coupled receptor kinase 4 [Source:MGI Symbol;Acc:MGI:95801]		TRUE	0.0213155	28	1856	10	0.00538793	0.357143	GO:0099188	GO:BP	postsynaptic cytoskeleton organization	27205	20154
Grm3	glutamate receptor, metabotropic 3 [Source:MGI Symbol;Acc:MGI:1351340]		TRUE	0.0213155	28	1856	10	0.00538793	0.357143	GO:0032469	GO:BP	endoplasmic reticulum calcium ion homeostasis	27205	8004
Gsdme	gasdermin E [Source:MGI Symbol;Acc:MGI:1889850]		TRUE	0.0216234	40	1856	12	0.00646552	0.3	GO:0070286	GO:BP	axonemal dynein complex assembly	27205	16962
Gse1	genetic suppressor element 1, coiled-coil protein [Source:MGI Symbol;Acc:MGI:1098275]		TRUE	0.0225131	186	1856	30	0.0161638	0.16129	GO:1903531	GO:BP	negative regulation of secretion by cell	27205	24182
Gsk3b	glycogen synthase kinase 3 beta [Source:MGI Symbol;Acc:MGI:1861437]		TRUE	0.0232468	107	1856	21	0.0113147	0.196262	GO:0030516	GO:BP	regulation of axon extension	27205	7196
Gsta4	glutathione S-transferase, alpha 4 [Source:MGI Symbol;Acc:MGI:1309515]		TRUE	0.0236075	159	1856	27	0.0145474	0.169811	GO:0050921	GO:BP	positive regulation of chemotaxis	27205	14116
Gstm1	glutathione S-transferase, mu 1 [Source:MGI Symbol;Acc:MGI:95860]		TRUE	0.0236075	159	1856	27	0.0145474	0.169811	GO:0030856	GO:BP	regulation of epithelial cell differentiation	27205	7305
Gstm5	glutathione S-transferase, mu 5 [Source:MGI Symbol;Acc:MGI:1309466]		TRUE	0.023915	450	1856	56	0.0301724	0.124444	GO:0030099	GO:BP	myeloid cell differentiation	27205	7040
Gstz1	glutathione transferase zeta 1 (maleylacetoacetate isomerase) [Source:MGI Symbol;Acc:MGI:1341859]		TRUE	0.0239159	99	1856	20	0.0107759	0.20202	GO:0070252	GO:BP	actin-mediated cell contraction	27205	16945
Gtf2ird1	general transcription factor II I repeat domain-containing 1 [Source:MGI Symbol;Acc:MGI:1861942]		TRUE	0.0240365	91	1856	19	0.0102371	0.208791	GO:0035914	GO:BP	skeletal muscle cell differentiation	27205	9845
Gucy1a2	guanylate cyclase 1, soluble, alpha 2 [Source:MGI Symbol;Acc:MGI:2660877]		TRUE	0.024772	571	1856	67	0.0360991	0.117338	GO:0009611	GO:BP	response to wounding	27205	3616
Gulp1	GULP, engulfment adaptor PTB domain containing 1 [Source:MGI Symbol;Acc:MGI:1920407]		TRUE	0.0251945	294	1856	41	0.0220905	0.139456	GO:0060485	GO:BP	mesenchyme development	27205	15517
H1f0	H1.0 linker histone [Source:MGI Symbol;Acc:MGI:95893]		TRUE	0.0253963	23	1856	9	0.00484914	0.391304	GO:2000114	GO:BP	regulation of establishment of cell polarity	27205	26717
H2-K1	histocompatibility 2, K1, K region [Source:MGI Symbol;Acc:MGI:95904]		TRUE	0.0256197	116	1856	22	0.0118534	0.189655	GO:0045666	GO:BP	positive regulation of neuron differentiation	27205	12217
H2-T23	histocompatibility 2, T region locus 23 [Source:MGI Symbol;Acc:MGI:95957]		TRUE	0.025664	206	1856	32	0.0172414	0.15534	GO:0045732	GO:BP	positive regulation of protein catabolic process	27205	12273
H3f3b	H3.3 histone B [Source:MGI Symbol;Acc:MGI:1101768]		TRUE	0.0259155	18	1856	8	0.00431034	0.444444	GO:0048712	GO:BP	negative regulation of astrocyte differentiation	27205	13709
Hap1	huntingtin-associated protein 1 [Source:MGI Symbol;Acc:MGI:1261831]		TRUE	0.0260215	54	1856	14	0.0075431	0.259259	GO:0002042	GO:BP	cell migration involved in sprouting angiogenesis	27205	659
Hapln1	hyaluronan and proteoglycan link protein 1 [Source:MGI Symbol;Acc:MGI:1337006]		TRUE	0.0263308	169	1856	28	0.0150862	0.16568	GO:0048017	GO:BP	inositol lipid-mediated signaling	27205	13205
Hdac11	histone deacetylase 11 [Source:MGI Symbol;Acc:MGI:2385252]		TRUE	0.0267999	245	1856	36	0.0193966	0.146939	GO:0009636	GO:BP	response to toxic substance	27205	3631
Hdac4	histone deacetylase 4 [Source:MGI Symbol;Acc:MGI:3036234]		TRUE	0.0270727	305	1856	42	0.0226293	0.137705	GO:0045765	GO:BP	regulation of angiogenesis	27205	12301
Hdac9	histone deacetylase 9 [Source:MGI Symbol;Acc:MGI:1931221]		TRUE	0.0274604	125	1856	23	0.0123922	0.184	GO:0043406	GO:BP	positive regulation of MAP kinase activity	27205	11264
Hdhd5	haloacid dehalogenase like hydrolase domain containing 5 [Source:MGI Symbol;Acc:MGI:2136976]		TRUE	0.02749	265	1856	38	0.0204741	0.143396	GO:1901215	GO:BP	negative regulation of neuron death	27205	22270
Hectd4	HECT domain E3 ubiquitin protein ligase 4 [Source:MGI Symbol;Acc:MGI:3647820]		TRUE	0.0279466	226	1856	34	0.018319	0.150442	GO:0043413	GO:BP	macromolecule glycosylation	27205	11270
Heg1	heart development protein with EGF-like domains 1 [Source:MGI Symbol;Acc:MGI:1924696]		TRUE	0.0279466	226	1856	34	0.018319	0.150442	GO:0006486	GO:BP	protein glycosylation	27205	2271
Hepacam	hepatocyte cell adhesion molecule [Source:MGI Symbol;Acc:MGI:1920177]		TRUE	0.02797	84	1856	18	0.00969828	0.214286	GO:0042773	GO:BP	ATP synthesis coupled electron transport	27205	10935
Herc1	HECT and RLD domain containing E3 ubiquitin protein ligase family member 1 [Source:MGI Symbol;Acc:MGI:2384589]		TRUE	0.0279971	100	1856	20	0.0107759	0.2	GO:0090630	GO:BP	activation of GTPase activity	27205	19411
Herc2	HECT and RLD domain containing E3 ubiquitin protein ligase 2 [Source:MGI Symbol;Acc:MGI:103234]		TRUE	0.0279971	100	1856	20	0.0107759	0.2	GO:0043502	GO:BP	regulation of muscle adaptation	27205	11331
Herpud1	homocysteine-inducible, endoplasmic reticulum stress-inducible, ubiquitin-like domain member 1 [Source:MGI Symbol;Acc:MGI:1927406]		TRUE	0.0283735	92	1856	19	0.0102371	0.206522	GO:0001570	GO:BP	vasculogenesis	27205	369
Hes5	hes family bHLH transcription factor 5 [Source:MGI Symbol;Acc:MGI:104876]		TRUE	0.0286796	41	1856	12	0.00646552	0.292683	GO:0032570	GO:BP	response to progesterone	27205	8061
Heyl	hairy/enhancer-of-split related with YRPW motif-like [Source:MGI Symbol;Acc:MGI:1860511]		TRUE	0.0286796	41	1856	12	0.00646552	0.292683	GO:0010765	GO:BP	positive regulation of sodium ion transport	27205	4486
Hif3a	hypoxia inducible factor 3, alpha subunit [Source:MGI Symbol;Acc:MGI:1859778]		TRUE	0.0286796	41	1856	12	0.00646552	0.292683	GO:0120316	GO:BP	sperm flagellum assembly	27205	20704
Hint1	histidine triad nucleotide binding protein 1 [Source:MGI Symbol;Acc:MGI:1321133]		TRUE	0.0287611	236	1856	35	0.0188578	0.148305	GO:0002685	GO:BP	regulation of leukocyte migration	27205	1221
Hip1	huntingtin interacting protein 1 [Source:MGI Symbol;Acc:MGI:1099804]		TRUE	0.029277	1243	1856	124	0.0668103	0.0997586	GO:0010628	GO:BP	positive regulation of gene expression	27205	4370
Hipk2	homeodomain interacting protein kinase 2 [Source:MGI Symbol;Acc:MGI:1314872]		TRUE	0.0293669	246	1856	36	0.0193966	0.146341	GO:0048705	GO:BP	skeletal system morphogenesis	27205	13702
H2ac19	H2A clustered histone 19 [Source:MGI Symbol;Acc:MGI:2448283]		TRUE	0.0304313	379	1856	49	0.0264009	0.129288	GO:0009100	GO:BP	glycoprotein metabolic process	27205	3348
H2ac18	H2A clustered histone 18 [Source:MGI Symbol;Acc:MGI:96097]		TRUE	0.0310705	189	1856	30	0.0161638	0.15873	GO:0045834	GO:BP	positive regulation of lipid metabolic process	27205	12352
Hivep3	human immunodeficiency virus type I enhancer binding protein 3 [Source:MGI Symbol;Acc:MGI:106589]		TRUE	0.0310978	35	1856	11	0.00592672	0.314286	GO:0048710	GO:BP	regulation of astrocyte differentiation	27205	13707
Hlf	hepatic leukemia factor [Source:MGI Symbol;Acc:MGI:96108]		TRUE	0.031567	237	1856	35	0.0188578	0.147679	GO:0072593	GO:BP	reactive oxygen species metabolic process	27205	18432
Hmcn1	hemicentin 1 [Source:MGI Symbol;Acc:MGI:2685047]		TRUE	0.0321577	247	1856	36	0.0193966	0.145749	GO:0006164	GO:BP	purine nucleotide biosynthetic process	27205	2043
Hmgcr	3-hydroxy-3-methylglutaryl-Coenzyme A reductase [Source:MGI Symbol;Acc:MGI:96159]		TRUE	0.0327156	267	1856	38	0.0204741	0.142322	GO:0034764	GO:BP	positive regulation of transmembrane transport	27205	9200
Hmgcs1	3-hydroxy-3-methylglutaryl-Coenzyme A synthase 1 [Source:MGI Symbol;Acc:MGI:107592]		TRUE	0.0337883	318	1856	43	0.0231681	0.13522	GO:0060326	GO:BP	cell chemotaxis	27205	15371
Hnrnpa2b1	heterogeneous nuclear ribonucleoprotein A2/B1 [Source:MGI Symbol;Acc:MGI:104819]		TRUE	0.0358325	70	1856	16	0.00862069	0.228571	GO:0060976	GO:BP	coronary vasculature development	27205	15974
Hook3	hook microtubule tethering protein 3 [Source:MGI Symbol;Acc:MGI:2443554]		TRUE	0.0358325	70	1856	16	0.00862069	0.228571	GO:0015986	GO:BP	proton motive force-driven ATP synthesis	27205	5185
Hopx	HOP homeobox [Source:MGI Symbol;Acc:MGI:1916782]		TRUE	0.0369009	172	1856	28	0.0150862	0.162791	GO:0042552	GO:BP	myelination	27205	10819
Hpcal1	hippocalcin-like 1 [Source:MGI Symbol;Acc:MGI:1855689]		TRUE	0.0372696	309	1856	42	0.0226293	0.135922	GO:1901342	GO:BP	regulation of vasculature development	27205	22370
Hpcal4	hippocalcin-like 4 [Source:MGI Symbol;Acc:MGI:2157521]		TRUE	0.0376683	42	1856	12	0.00646552	0.285714	GO:1900026	GO:BP	positive regulation of substrate adhesion-dependent cell spreading	27205	21244
Hr	lysine demethylase and nuclear receptor corepressor [Source:MGI Symbol;Acc:MGI:96223]		TRUE	0.0381737	24	1856	9	0.00484914	0.375	GO:0006123	GO:BP	mitochondrial electron transport, cytochrome c to oxygen	27205	2025
Hrh1	histamine receptor H1 [Source:MGI Symbol;Acc:MGI:107619]		TRUE	0.0383407	78	1856	17	0.00915948	0.217949	GO:0003151	GO:BP	outflow tract morphogenesis	27205	1606
Hsbp1	heat shock factor binding protein 1 [Source:MGI Symbol;Acc:MGI:1915446]		TRUE	0.0387732	259	1856	37	0.0199353	0.142857	GO:0048738	GO:BP	cardiac muscle tissue development	27205	13735
Hsd11b1	hydroxysteroid 11-beta dehydrogenase 1 [Source:MGI Symbol;Acc:MGI:103562]		TRUE	0.0407456	49	1856	13	0.00700431	0.265306	GO:0045773	GO:BP	positive regulation of axon extension	27205	12307
Hspa12a	heat shock protein 12A [Source:MGI Symbol;Acc:MGI:1920692]		TRUE	0.0410359	128	1856	23	0.0123922	0.179688	GO:0043500	GO:BP	muscle adaptation	27205	11329
Hspa2	heat shock protein 2 [Source:MGI Symbol;Acc:MGI:96243]		TRUE	0.0420279	36	1856	11	0.00592672	0.305556	GO:0032232	GO:BP	negative regulation of actin filament bundle assembly	27205	7841
Hspa8	heat shock protein 8 [Source:MGI Symbol;Acc:MGI:105384]		TRUE	0.0422357	211	1856	32	0.0172414	0.151659	GO:0046890	GO:BP	regulation of lipid biosynthetic process	27205	13144
Htra1	HtrA serine peptidase 1 [Source:MGI Symbol;Acc:MGI:1929076]		TRUE	0.0422607	137	1856	24	0.012931	0.175182	GO:0008277	GO:BP	regulation of G protein-coupled receptor signaling pathway	27205	3222
Hydin	HYDIN, axonemal central pair apparatus protein [Source:MGI Symbol;Acc:MGI:2389007]		TRUE	0.0422797	270	1856	38	0.0204741	0.140741	GO:0090092	GO:BP	regulation of transmembrane receptor protein serine/threonine kinase signaling pathway	27205	19021
Icosl	icos ligand [Source:MGI Symbol;Acc:MGI:1354701]		TRUE	0.0428018	146	1856	25	0.0134698	0.171233	GO:0090277	GO:BP	positive regulation of peptide hormone secretion	27205	19186
Id1	inhibitor of DNA binding 1, HLH protein [Source:MGI Symbol;Acc:MGI:96396]		TRUE	0.0430229	30	1856	10	0.00538793	0.333333	GO:0007288	GO:BP	sperm axoneme assembly	27205	2884
Id2	inhibitor of DNA binding 2 [Source:MGI Symbol;Acc:MGI:96397]		TRUE	0.0433503	71	1856	16	0.00862069	0.225352	GO:1902893	GO:BP	regulation of miRNA transcription	27205	23651
Id3	inhibitor of DNA binding 3 [Source:MGI Symbol;Acc:MGI:96398]		TRUE	0.0457758	79	1856	17	0.00915948	0.21519	GO:1904888	GO:BP	cranial skeletal system development	27205	25356
Id4	inhibitor of DNA binding 4 [Source:MGI Symbol;Acc:MGI:99414]		TRUE	0.0459109	95	1856	19	0.0102371	0.2	GO:0010586	GO:BP	miRNA metabolic process	27205	4330
Idi1	isopentenyl-diphosphate delta isomerase [Source:MGI Symbol;Acc:MGI:2442264]		TRUE	0.0459539	174	1856	28	0.0150862	0.16092	GO:0097746	GO:BP	blood vessel diameter maintenance	27205	19807
Ier2	immediate early response 2 [Source:MGI Symbol;Acc:MGI:104815]		TRUE	0.0459539	174	1856	28	0.0150862	0.16092	GO:0035296	GO:BP	regulation of tube diameter	27205	9436
Ifi27	interferon, alpha-inducible protein 27 [Source:MGI Symbol;Acc:MGI:1277180]		TRUE	0.0459976	271	1856	38	0.0204741	0.140221	GO:0048863	GO:BP	stem cell differentiation	27205	13846
Ift81	intraflagellar transport 81 [Source:MGI Symbol;Acc:MGI:1098597]		TRUE	0.0465235	87	1856	18	0.00969828	0.206897	GO:0001738	GO:BP	morphogenesis of a polarized epithelium	27205	428
Ift88	intraflagellar transport 88 [Source:MGI Symbol;Acc:MGI:98715]		TRUE	0.0477653	64	1856	15	0.0080819	0.234375	GO:0051932	GO:BP	synaptic transmission, GABAergic	27205	14791
Igdcc3	immunoglobulin superfamily, DCC subclass, member 3 [Source:MGI Symbol;Acc:MGI:1202390]		TRUE	0.0477653	64	1856	15	0.0080819	0.234375	GO:1902305	GO:BP	regulation of sodium ion transmembrane transport	27205	23215
Igf1r	insulin-like growth factor I receptor [Source:MGI Symbol;Acc:MGI:96433]		TRUE	0.0482879	112	1856	21	0.0113147	0.1875	GO:0022904	GO:BP	respiratory electron transport chain	27205	6993
Igf2bp3	insulin-like growth factor 2 mRNA binding protein 3 [Source:MGI Symbol;Acc:MGI:1890359]		TRUE	0.0482879	112	1856	21	0.0113147	0.1875	GO:0018107	GO:BP	peptidyl-threonine phosphorylation	27205	5494
Igsf1	immunoglobulin superfamily, member 1 [Source:MGI Symbol;Acc:MGI:2147913]		TRUE	0.0490198	43	1856	12	0.00646552	0.27907	GO:0097484	GO:BP	dendrite extension	27205	19718
Igsf21	immunoglobulin superfamily, member 21 [Source:MGI Symbol;Acc:MGI:2681842]		TRUE	1.66561e-103	11620	1857	1243	0.669359	0.106971	GO:0005737	GO:CC	cytoplasm	27262	309
Igsf8	immunoglobulin superfamily, member 8 [Source:MGI Symbol;Acc:MGI:2154090]		TRUE	2.47152e-81	2617	1857	452	0.243403	0.172717	GO:0042995	GO:CC	cell projection	27262	1850
Il15	interleukin 15 [Source:MGI Symbol;Acc:MGI:103014]		TRUE	2.03028e-78	2517	1857	436	0.234787	0.173222	GO:0120025	GO:CC	plasma membrane bounded cell projection	27262	3453
Il18	interleukin 18 [Source:MGI Symbol;Acc:MGI:107936]		TRUE	1.53236e-62	2294	1857	382	0.205708	0.166521	GO:0030054	GO:CC	cell junction	27262	871
Il1rapl1	interleukin 1 receptor accessory protein-like 1 [Source:MGI Symbol;Acc:MGI:2687319]		TRUE	2.56769e-59	1677	1857	309	0.166397	0.184258	GO:0045202	GO:CC	synapse	27262	2147
Il1rapl2	interleukin 1 receptor accessory protein-like 2 [Source:MGI Symbol;Acc:MGI:1913106]		TRUE	1.71431e-55	1633	1857	297	0.159935	0.181874	GO:0043005	GO:CC	neuron projection	27262	1851
Il31ra	interleukin 31 receptor A [Source:MGI Symbol;Acc:MGI:2180511]		TRUE	1.33561e-45	1120	1857	220	0.118471	0.196429	GO:0036477	GO:CC	somatodendritic compartment	27262	1724
Il33	interleukin 33 [Source:MGI Symbol;Acc:MGI:1924375]		TRUE	4.85727e-42	866	1857	183	0.098546	0.211316	GO:0098794	GO:CC	postsynapse	27262	3266
Ildr2	immunoglobulin-like domain containing receptor 2 [Source:MGI Symbol;Acc:MGI:1196370]		TRUE	2.05834e-41	17505	1857	1459	0.785676	0.0833476	GO:0005622	GO:CC	intracellular anatomical structure	27262	237
Impact	impact, RWD domain protein [Source:MGI Symbol;Acc:MGI:1098233]		TRUE	2.5789e-38	1420	1857	240	0.129241	0.169014	GO:0098590	GO:CC	plasma membrane region	27262	3226
Ino80	INO80 complex subunit [Source:MGI Symbol;Acc:MGI:1915392]		TRUE	9.37835e-37	801	1857	166	0.0893915	0.207241	GO:0030425	GO:CC	dendrite	27262	936
Ino80d	INO80 complex subunit D [Source:MGI Symbol;Acc:MGI:3027003]		TRUE	1.30782e-36	803	1857	166	0.0893915	0.206725	GO:0097447	GO:CC	dendritic tree	27262	3014
Ino80dos	INO80 complex subunit D, opposite strand [Source:MGI Symbol;Acc:MGI:3651861]		TRUE	8.99822e-36	610	1857	140	0.0753904	0.229508	GO:0098978	GO:CC	glutamatergic synapse	27262	3325
Inpp4b	inositol polyphosphate-4-phosphatase, type II [Source:MGI Symbol;Acc:MGI:2158925]		TRUE	1.98233e-33	16219	1857	1354	0.729133	0.0834823	GO:0043226	GO:CC	organelle	27262	1883
Insig1	insulin induced gene 1 [Source:MGI Symbol;Acc:MGI:1916289]		TRUE	1.31243e-32	22796	1857	1726	0.929456	0.075715	GO:0110165	GO:CC	cellular anatomical entity	27262	3449
Insr	insulin receptor [Source:MGI Symbol;Acc:MGI:96575]		TRUE	7.50113e-32	484	1857	117	0.0630048	0.241736	GO:0098984	GO:CC	neuron to neuron synapse	27262	3331
Insyn2a	inhibitory synaptic factor 2A [Source:MGI Symbol;Acc:MGI:3605068]		TRUE	8.40392e-32	832	1857	161	0.086699	0.19351	GO:0044297	GO:CC	cell body	27262	2056
Iqca	IQ motif containing with AAA domain [Source:MGI Symbol;Acc:MGI:1922168]		TRUE	9.25062e-32	485	1857	117	0.0630048	0.241237	GO:0097060	GO:CC	synaptic membrane	27262	2907
Iqch	IQ motif containing H [Source:MGI Symbol;Acc:MGI:1925500]		TRUE	1.02276e-31	2363	1857	319	0.171782	0.134998	GO:0005856	GO:CC	cytoskeleton	27262	401
Iqsec1	IQ motif and Sec7 domain 1 [Source:MGI Symbol;Acc:MGI:1196356]		TRUE	1.77583e-31	795	1857	156	0.0840065	0.196226	GO:0030424	GO:CC	axon	27262	935
Iqub	IQ motif and ubiquitin domain containing [Source:MGI Symbol;Acc:MGI:3041159]		TRUE	6.42824e-30	447	1857	109	0.0586968	0.243848	GO:0032279	GO:CC	asymmetric synapse	27262	1285
Irak2	interleukin-1 receptor-associated kinase 2 [Source:MGI Symbol;Acc:MGI:2429603]		TRUE	9.5024e-30	746	1857	147	0.0791599	0.197051	GO:0043025	GO:CC	neuronal cell body	27262	1853
Irf2	interferon regulatory factor 2 [Source:MGI Symbol;Acc:MGI:96591]		TRUE	1.39375e-29	429	1857	106	0.0570813	0.247086	GO:0014069	GO:CC	postsynaptic density	27262	696
Irx3	Iroquois related homeobox 3 [Source:MGI Symbol;Acc:MGI:1197522]		TRUE	2.46323e-29	4282	1857	481	0.25902	0.112331	GO:0012505	GO:CC	endomembrane system	27262	689
Irx5	Iroquois homeobox 5 [Source:MGI Symbol;Acc:MGI:1859086]		TRUE	1.62142e-28	470	1857	110	0.0592353	0.234043	GO:0099572	GO:CC	postsynaptic specialization	27262	3384
Itga6	integrin alpha 6 [Source:MGI Symbol;Acc:MGI:96605]		TRUE	4.02e-27	10310	1857	933	0.502423	0.0904947	GO:0016020	GO:CC	membrane	27262	722
Itgbl1	integrin, beta-like 1 [Source:MGI Symbol;Acc:MGI:2443439]		TRUE	1.63231e-25	15891	1857	1303	0.701669	0.0819961	GO:0043229	GO:CC	intracellular organelle	27262	1886
Itih3	inter-alpha trypsin inhibitor, heavy chain 3 [Source:MGI Symbol;Acc:MGI:96620]		TRUE	6.6066e-24	332	1857	84	0.0452342	0.253012	GO:0045211	GO:CC	postsynaptic membrane	27262	2148
Itm2b	integral membrane protein 2B [Source:MGI Symbol;Acc:MGI:1309517]		TRUE	1.69007e-22	744	1857	133	0.0716209	0.178763	GO:0098793	GO:CC	presynapse	27262	3265
Itpkb	inositol 1,4,5-trisphosphate 3-kinase B [Source:MGI Symbol;Acc:MGI:109235]		TRUE	1.50336e-20	14993	1857	1223	0.658589	0.0815714	GO:0043227	GO:CC	membrane-bounded organelle	27262	1884
Itpr1	inositol 1,4,5-trisphosphate receptor 1 [Source:MGI Symbol;Acc:MGI:96623]		TRUE	2.4159e-20	4127	1857	436	0.234787	0.105646	GO:0005829	GO:CC	cytosol	27262	380
Itpr2	inositol 1,4,5-triphosphate receptor 2 [Source:MGI Symbol;Acc:MGI:99418]		TRUE	2.83492e-18	1206	1857	172	0.0926225	0.14262	GO:0098796	GO:CC	membrane protein complex	27262	3267
Itsn2	intersectin 2 [Source:MGI Symbol;Acc:MGI:1338049]		TRUE	4.49144e-17	1531	1857	200	0.107701	0.130634	GO:0005794	GO:CC	Golgi apparatus	27262	358
Ivd	isovaleryl coenzyme A dehydrogenase [Source:MGI Symbol;Acc:MGI:1929242]		TRUE	7.93302e-16	737	1857	118	0.0635433	0.160109	GO:0005929	GO:CC	cilium	27262	455
Izumo4	IZUMO family member 4 [Source:MGI Symbol;Acc:MGI:1918814]		TRUE	1.24289e-15	7048	1857	642	0.345719	0.0910897	GO:0071944	GO:CC	cell periphery	27262	2801
Jag1	jagged 1 [Source:MGI Symbol;Acc:MGI:1095416]		TRUE	2.18382e-15	304	1857	67	0.0360797	0.220395	GO:0099568	GO:CC	cytoplasmic region	27262	3381
Jakmip1	janus kinase and microtubule interacting protein 1 [Source:MGI Symbol;Acc:MGI:1923321]		TRUE	2.28622e-15	467	1857	87	0.0468498	0.186296	GO:0005874	GO:CC	microtubule	27262	414
Jarid2	jumonji, AT rich interactive domain 2 [Source:MGI Symbol;Acc:MGI:104813]		TRUE	2.74812e-15	231	1857	57	0.0306947	0.246753	GO:0044309	GO:CC	neuron spine	27262	2068
Jhy	junctional cadherin complex regulator [Source:MGI Symbol;Acc:MGI:1918239]		TRUE	3.49919e-15	225	1857	56	0.0301562	0.248889	GO:0043197	GO:CC	dendritic spine	27262	1872
Jpx	Jpx transcript, Xist activator (non-protein coding) [Source:MGI Symbol;Acc:MGI:2180008]		TRUE	8.79651e-15	3300	1857	346	0.186322	0.104848	GO:0031090	GO:CC	organelle membrane	27262	1048
Jun	jun proto-oncogene [Source:MGI Symbol;Acc:MGI:96646]		TRUE	1.31344e-14	454	1857	84	0.0452342	0.185022	GO:0031252	GO:CC	cell leading edge	27262	1077
Junb	jun B proto-oncogene [Source:MGI Symbol;Acc:MGI:96647]		TRUE	1.62474e-14	225	1857	55	0.0296177	0.244444	GO:0042734	GO:CC	presynaptic membrane	27262	1839
Kalrn	kalirin, RhoGEF kinase [Source:MGI Symbol;Acc:MGI:2685385]		TRUE	2.17342e-14	390	1857	76	0.0409262	0.194872	GO:0150034	GO:CC	distal axon	27262	3593
Kank1	KN motif and ankyrin repeat domains 1 [Source:MGI Symbol;Acc:MGI:2147707]		TRUE	4.17869e-14	1369	1857	176	0.0947765	0.128561	GO:0015630	GO:CC	microtubule cytoskeleton	27262	710
Kansl1	KAT8 regulatory NSL complex subunit 1 [Source:MGI Symbol;Acc:MGI:1923969]		TRUE	4.46472e-14	267	1857	60	0.0323102	0.224719	GO:0032838	GO:CC	plasma membrane bounded cell projection cytoplasm	27262	1334
Kansl1l	KAT8 regulatory NSL complex subunit 1-like [Source:MGI Symbol;Acc:MGI:1915941]		TRUE	3.32271e-13	392	1857	74	0.0398492	0.188776	GO:1902495	GO:CC	transmembrane transporter complex	27262	3621
Kantr	Kdm5c adjacent non-coding transcript [Source:MGI Symbol;Acc:MGI:1920247]		TRUE	5.5407e-13	125	1857	38	0.0204631	0.304	GO:0098982	GO:CC	GABA-ergic synapse	27262	3329
Kat6b	K(lysine) acetyltransferase 6B [Source:MGI Symbol;Acc:MGI:1858746]		TRUE	9.2336e-13	6567	1857	591	0.318255	0.0899954	GO:0005886	GO:CC	plasma membrane	27262	424
Katnal2	katanin p60 subunit A-like 2 [Source:MGI Symbol;Acc:MGI:1924234]		TRUE	9.83721e-13	417	1857	76	0.0409262	0.182254	GO:1990351	GO:CC	transporter complex	27262	3868
Kcna2	potassium voltage-gated channel, shaker-related subfamily, member 2 [Source:MGI Symbol;Acc:MGI:96659]		TRUE	1.33439e-12	210	1857	50	0.0269251	0.238095	GO:0043209	GO:CC	myelin sheath	27262	1877
Kcnab1	potassium voltage-gated channel, shaker-related subfamily, beta member 1 [Source:MGI Symbol;Acc:MGI:109155]		TRUE	1.75752e-12	727	1857	109	0.0586968	0.149931	GO:0070161	GO:CC	anchoring junction	27262	2447
Kcnc4	potassium voltage gated channel, Shaw-related subfamily, member 4 [Source:MGI Symbol;Acc:MGI:96670]		TRUE	2.06883e-12	227	1857	52	0.0280022	0.229075	GO:0030427	GO:CC	site of polarized growth	27262	938
Kcnd2	potassium voltage-gated channel, Shal-related family, member 2 [Source:MGI Symbol;Acc:MGI:102663]		TRUE	8.70627e-12	1050	1857	139	0.0748519	0.132381	GO:0099512	GO:CC	supramolecular fiber	27262	3374
Kcng4	potassium voltage-gated channel, subfamily G, member 4 [Source:MGI Symbol;Acc:MGI:1913983]		TRUE	9.54108e-12	220	1857	50	0.0269251	0.227273	GO:0030426	GO:CC	growth cone	27262	937
Kcnip1	Kv channel-interacting protein 1 [Source:MGI Symbol;Acc:MGI:1917607]		TRUE	1.57992e-11	1058	1857	139	0.0748519	0.13138	GO:0099081	GO:CC	supramolecular polymer	27262	3351
Kcnip3	Kv channel interacting protein 3, calsenilin [Source:MGI Symbol;Acc:MGI:1929258]		TRUE	2.29518e-11	805	1857	114	0.0613893	0.141615	GO:0099513	GO:CC	polymeric cytoskeletal fiber	27262	3375
Kcnip4	Kv channel interacting protein 4 [Source:MGI Symbol;Acc:MGI:1933131]		TRUE	2.61704e-11	1400	1857	170	0.0915455	0.121429	GO:0099080	GO:CC	supramolecular complex	27262	3350
Kcnj10	potassium inwardly-rectifying channel, subfamily J, member 10 [Source:MGI Symbol;Acc:MGI:1194504]		TRUE	3.54726e-11	161	1857	41	0.0220786	0.254658	GO:0005930	GO:CC	axoneme	27262	456
Kcnj16	potassium inwardly-rectifying channel, subfamily J, member 16 [Source:MGI Symbol;Acc:MGI:1314842]		TRUE	4.40794e-11	155	1857	40	0.0215401	0.258065	GO:0099634	GO:CC	postsynaptic specialization membrane	27262	3390
Kcnj3	potassium inwardly-rectifying channel, subfamily J, member 3 [Source:MGI Symbol;Acc:MGI:104742]		TRUE	5.27848e-11	14518	1857	1140	0.613893	0.0785232	GO:0043231	GO:CC	intracellular membrane-bounded organelle	27262	1888
Kcnk1	potassium channel, subfamily K, member 1 [Source:MGI Symbol;Acc:MGI:109322]		TRUE	5.54693e-11	163	1857	41	0.0220786	0.251534	GO:0097014	GO:CC	ciliary plasm	27262	2900
Kcnma1	potassium large conductance calcium-activated channel, subfamily M, alpha member 1 [Source:MGI Symbol;Acc:MGI:99923]		TRUE	9.01886e-11	801	1857	112	0.0603123	0.139825	GO:0048471	GO:CC	perinuclear region of cytoplasm	27262	2238
Kcnn2	potassium intermediate/small conductance calcium-activated channel, subfamily N, member 2 [Source:MGI Symbol;Acc:MGI:2153182]		TRUE	9.90436e-11	2239	1857	241	0.129779	0.107637	GO:0031982	GO:CC	vesicle	27262	1231
Kcnn3	potassium intermediate/small conductance calcium-activated channel, subfamily N, member 3 [Source:MGI Symbol;Acc:MGI:2153183]		TRUE	1.97841e-10	134	1857	36	0.0193861	0.268657	GO:0098685	GO:CC	Schaffer collateral - CA1 synapse	27262	3252
Kcnq1	potassium voltage-gated channel, subfamily Q, member 1 [Source:MGI Symbol;Acc:MGI:108083]		TRUE	3.03439e-10	2085	1857	226	0.121702	0.108393	GO:0031410	GO:CC	cytoplasmic vesicle	27262	1109
Kcnq1ot1	KCNQ1 overlapping transcript 1 [Source:MGI Symbol;Acc:MGI:1926855]		TRUE	3.50831e-10	2088	1857	226	0.121702	0.108238	GO:0097708	GO:CC	intracellular vesicle	27262	3146
Kcnq3	potassium voltage-gated channel, subfamily Q, member 3 [Source:MGI Symbol;Acc:MGI:1336181]		TRUE	1.0742e-09	402	1857	68	0.0366182	0.169154	GO:0045121	GO:CC	membrane raft	27262	2137
Kcns3	potassium voltage-gated channel, delayed-rectifier, subfamily S, member 3 [Source:MGI Symbol;Acc:MGI:1098804]		TRUE	1.20806e-09	403	1857	68	0.0366182	0.168734	GO:0098857	GO:CC	membrane microdomain	27262	3298
Kcnt1	potassium channel, subfamily T, member 1 [Source:MGI Symbol;Acc:MGI:1924627]		TRUE	1.34992e-09	115	1857	32	0.0172321	0.278261	GO:0098839	GO:CC	postsynaptic density membrane	27262	3287
Kdm5d	lysine (K)-specific demethylase 5D [Source:MGI Symbol;Acc:MGI:99780]		TRUE	2.02377e-09	110	1857	31	0.0166936	0.281818	GO:0048786	GO:CC	presynaptic active zone	27262	2249
Khdrbs3	KH domain containing, RNA binding, signal transduction associated 3 [Source:MGI Symbol;Acc:MGI:1313312]		TRUE	2.56333e-09	580	1857	86	0.0463113	0.148276	GO:0098797	GO:CC	plasma membrane protein complex	27262	3268
Kidins220	kinase D-interacting substrate 220 [Source:MGI Symbol;Acc:MGI:1924730]		TRUE	8.26008e-09	534	1857	80	0.0430802	0.149813	GO:0005911	GO:CC	cell-cell junction	27262	441
Kif13a	kinesin family member 13A [Source:MGI Symbol;Acc:MGI:1098264]		TRUE	8.30559e-09	3810	1857	359	0.193323	0.0942257	GO:0005654	GO:CC	nucleoplasm	27262	252
Kif13b	kinesin family member 13B [Source:MGI Symbol;Acc:MGI:1098265]		TRUE	3.15476e-08	150	1857	35	0.0188476	0.233333	GO:0098800	GO:CC	inner mitochondrial membrane protein complex	27262	3271
Kif19a	kinesin family member 19A [Source:MGI Symbol;Acc:MGI:2447024]		TRUE	3.18935e-08	88	1857	26	0.0140011	0.295455	GO:0060076	GO:CC	excitatory synapse	27262	2271
Kif27	kinesin family member 27 [Source:MGI Symbol;Acc:MGI:1922300]		TRUE	3.2425e-08	101	1857	28	0.0150781	0.277228	GO:0031594	GO:CC	neuromuscular junction	27262	1172
Kif3c	kinesin family member 3C [Source:MGI Symbol;Acc:MGI:107979]		TRUE	4.35182e-08	503	1857	75	0.0403877	0.149105	GO:0015629	GO:CC	actin cytoskeleton	27262	709
Kif5a	kinesin family member 5A [Source:MGI Symbol;Acc:MGI:109564]		TRUE	7.26273e-08	403	1857	64	0.0344642	0.158809	GO:0043235	GO:CC	receptor complex	27262	1891
Kif5c	kinesin family member 5C [Source:MGI Symbol;Acc:MGI:1098269]		TRUE	8.74041e-08	1292	1857	148	0.0796984	0.114551	GO:0031975	GO:CC	envelope	27262	1225
Kif6	kinesin family member 6 [Source:MGI Symbol;Acc:MGI:1098238]		TRUE	8.74041e-08	1292	1857	148	0.0796984	0.114551	GO:0031967	GO:CC	organelle envelope	27262	1218
Kif9	kinesin family member 9 [Source:MGI Symbol;Acc:MGI:1098237]		TRUE	1.64509e-07	711	1857	94	0.0506193	0.132208	GO:0099503	GO:CC	secretory vesicle	27262	3373
Kirrel3	kirre like nephrin family adhesion molecule 3 [Source:MGI Symbol;Acc:MGI:1914953]		TRUE	1.98708e-07	302	1857	52	0.0280022	0.172185	GO:0034702	GO:CC	monoatomic ion channel complex	27262	1540
Kiz	kizuna centrosomal protein [Source:MGI Symbol;Acc:MGI:2684960]		TRUE	3.47706e-07	1894	1857	197	0.106085	0.104013	GO:0005783	GO:CC	endoplasmic reticulum	27262	348
Klc1	kinesin light chain 1 [Source:MGI Symbol;Acc:MGI:107978]		TRUE	5.06596e-07	1951	1857	201	0.108239	0.103024	GO:0005739	GO:CC	mitochondrion	27262	310
Klf12	Kruppel-like factor 12 [Source:MGI Symbol;Acc:MGI:1333796]		TRUE	5.28057e-07	79	1857	23	0.0123856	0.291139	GO:0044304	GO:CC	main axon	27262	2063
Klf2	Kruppel-like factor 2 (lung) [Source:MGI Symbol;Acc:MGI:1342772]		TRUE	6.1267e-07	258	1857	46	0.0247711	0.178295	GO:0008021	GO:CC	synaptic vesicle	27262	488
Klf7	Kruppel-like factor 7 (ubiquitous) [Source:MGI Symbol;Acc:MGI:1935151]		TRUE	7.05874e-07	1707	1857	180	0.0969305	0.105448	GO:0098588	GO:CC	bounding membrane of organelle	27262	3225
Klf9	Kruppel-like factor 9 [Source:MGI Symbol;Acc:MGI:1333856]		TRUE	1.2938e-06	187	1857	37	0.0199246	0.197861	GO:0031256	GO:CC	leading edge membrane	27262	1081
Klhdc10	kelch domain containing 10 [Source:MGI Symbol;Acc:MGI:1924038]		TRUE	2.13869e-06	277	1857	47	0.0253096	0.169675	GO:0070382	GO:CC	exocytic vesicle	27262	2478
Klhdc7a	kelch domain containing 7A [Source:MGI Symbol;Acc:MGI:2444612]		TRUE	2.52244e-06	343	1857	54	0.0290792	0.157434	GO:0005938	GO:CC	cell cortex	27262	462
Klhl10	kelch-like 10 [Source:MGI Symbol;Acc:MGI:2181067]		TRUE	2.64678e-06	92	1857	24	0.0129241	0.26087	GO:0034705	GO:CC	potassium channel complex	27262	1543
Klhl29	kelch-like 29 [Source:MGI Symbol;Acc:MGI:2683857]		TRUE	3.98603e-06	415	1857	61	0.0328487	0.146988	GO:0030133	GO:CC	transport vesicle	27262	912
Klhl32	kelch-like 32 [Source:MGI Symbol;Acc:MGI:3612790]		TRUE	4.22425e-06	212	1857	39	0.0210016	0.183962	GO:0043204	GO:CC	perikaryon	27262	1876
Kmt2a	lysine (K)-specific methyltransferase 2A [Source:MGI Symbol;Acc:MGI:96995]		TRUE	4.39783e-06	506	1857	70	0.0376952	0.13834	GO:0031012	GO:CC	extracellular matrix	27262	1031
Kmt2c	lysine (K)-specific methyltransferase 2C [Source:MGI Symbol;Acc:MGI:2444959]		TRUE	4.63406e-06	1787	1857	183	0.098546	0.102406	GO:1902494	GO:CC	catalytic complex	27262	3620
Kmt2e	lysine (K)-specific methyltransferase 2E [Source:MGI Symbol;Acc:MGI:1924825]		TRUE	4.86361e-06	196	1857	37	0.0199246	0.188776	GO:0034703	GO:CC	cation channel complex	27262	1541
Kmt5b	lysine methyltransferase 5B [Source:MGI Symbol;Acc:MGI:2444557]		TRUE	5.17179e-06	508	1857	70	0.0376952	0.137795	GO:0030312	GO:CC	external encapsulating structure	27262	930
Krtcap2	keratinocyte associated protein 2 [Source:MGI Symbol;Acc:MGI:1913309]		TRUE	1.52724e-05	778	1857	94	0.0506193	0.120823	GO:0031966	GO:CC	mitochondrial membrane	27262	1217
Ky	kyphoscoliosis peptidase [Source:MGI Symbol;Acc:MGI:96709]		TRUE	1.73907e-05	22	1857	11	0.00592353	0.5	GO:0097449	GO:CC	astrocyte projection	27262	3016
L3mbtl4	L3MBTL4 histone methyl-lysine binding protein [Source:MGI Symbol;Acc:MGI:2444889]		TRUE	2.55325e-05	539	1857	71	0.0382337	0.131725	GO:0045177	GO:CC	apical part of cell	27262	2143
Lama2	laminin, alpha 2 [Source:MGI Symbol;Acc:MGI:99912]		TRUE	2.6894e-05	55	1857	17	0.00915455	0.309091	GO:0048787	GO:CC	presynaptic active zone membrane	27262	2250
Lamp1	lysosomal-associated membrane protein 1 [Source:MGI Symbol;Acc:MGI:96745]		TRUE	3.90936e-05	90	1857	22	0.0118471	0.244444	GO:0005746	GO:CC	mitochondrial respirasome	27262	317
Laptm4a	lysosomal-associated protein transmembrane 4A [Source:MGI Symbol;Acc:MGI:108017]		TRUE	3.90936e-05	90	1857	22	0.0118471	0.244444	GO:0098803	GO:CC	respiratory chain complex	27262	3273
Large1	LARGE xylosyl- and glucuronyltransferase 1 [Source:MGI Symbol;Acc:MGI:1342270]		TRUE	4.43525e-05	161	1857	31	0.0166936	0.192547	GO:0005912	GO:CC	adherens junction	27262	442
Larp1	La ribonucleoprotein 1, translational regulator [Source:MGI Symbol;Acc:MGI:1890165]		TRUE	4.53213e-05	98	1857	23	0.0123856	0.234694	GO:0070469	GO:CC	respirasome	27262	2505
Lars2	leucyl-tRNA synthetase, mitochondrial [Source:MGI Symbol;Acc:MGI:2142973]		TRUE	5.09646e-05	45	1857	15	0.00807754	0.333333	GO:0099522	GO:CC	cytosolic region	27262	3376
Lbp	lipopolysaccharide binding protein [Source:MGI Symbol;Acc:MGI:1098776]		TRUE	5.17462e-05	179	1857	33	0.0177706	0.184358	GO:0019897	GO:CC	extrinsic component of plasma membrane	27262	828
Lcorl	ligand dependent nuclear receptor corepressor-like [Source:MGI Symbol;Acc:MGI:2651932]		TRUE	5.38076e-05	375	1857	54	0.0290792	0.144	GO:0062023	GO:CC	collagen-containing extracellular matrix	27262	2367
Ldb2	LIM domain binding 2 [Source:MGI Symbol;Acc:MGI:894670]		TRUE	5.8671e-05	29	1857	12	0.00646204	0.413793	GO:0099243	GO:CC	extrinsic component of synaptic membrane	27262	3369
Ldhb	lactate dehydrogenase B [Source:MGI Symbol;Acc:MGI:96763]		TRUE	6.62705e-05	40	1857	14	0.00753904	0.35	GO:0070069	GO:CC	cytochrome complex	27262	2430
Ldlr	low density lipoprotein receptor [Source:MGI Symbol;Acc:MGI:96765]		TRUE	6.85432e-05	837	1857	97	0.0522348	0.11589	GO:0005740	GO:CC	mitochondrial envelope	27262	311
Ldlrad4	low density lipoprotein receptor class A domain containing 4 [Source:MGI Symbol;Acc:MGI:1277150]		TRUE	7.98791e-05	16	1857	9	0.00484653	0.5625	GO:0098890	GO:CC	extrinsic component of postsynaptic membrane	27262	3308
Leng8	leukocyte receptor cluster (LRC) member 8 [Source:MGI Symbol;Acc:MGI:2142195]		TRUE	9.16047e-05	117	1857	25	0.0134626	0.213675	GO:0030175	GO:CC	filopodium	27262	922
Lfng	LFNG O-fucosylpeptide 3-beta-N-acetylglucosaminyltransferase [Source:MGI Symbol;Acc:MGI:1095413]		TRUE	9.43292e-05	41	1857	14	0.00753904	0.341463	GO:0097386	GO:CC	glial cell projection	27262	2987
Lgals1	lectin, galactose binding, soluble 1 [Source:MGI Symbol;Acc:MGI:96777]		TRUE	0.000104618	304	1857	46	0.0247711	0.151316	GO:0009925	GO:CC	basal plasma membrane	27262	660
Lgi1	leucine-rich repeat LGI family, member 1 [Source:MGI Symbol;Acc:MGI:1861691]		TRUE	0.000106898	211	1857	36	0.0193861	0.170616	GO:0030027	GO:CC	lamellipodium	27262	870
Lgmn	legumain [Source:MGI Symbol;Acc:MGI:1330838]		TRUE	0.000143512	269	1857	42	0.0226171	0.156134	GO:0016323	GO:CC	basolateral plasma membrane	27262	733
Lgr6	leucine-rich repeat-containing G protein-coupled receptor 6 [Source:MGI Symbol;Acc:MGI:2441805]		TRUE	0.000151225	367	1857	52	0.0280022	0.141689	GO:0031253	GO:CC	cell projection membrane	27262	1078
Lhfp	lipoma HMGIC fusion partner [Source:MGI Symbol;Acc:MGI:1920048]		TRUE	0.000244753	70	1857	18	0.00969305	0.257143	GO:0043198	GO:CC	dendritic shaft	27262	1873
Lhfpl2	lipoma HMGIC fusion partner-like 2 [Source:MGI Symbol;Acc:MGI:2145236]		TRUE	0.000247999	323	1857	47	0.0253096	0.145511	GO:0045178	GO:CC	basal part of cell	27262	2144
Lhx2	LIM homeobox protein 2 [Source:MGI Symbol;Acc:MGI:96785]		TRUE	0.00034841	185	1857	32	0.0172321	0.172973	GO:0001726	GO:CC	ruffle	27262	155
Limch1	LIM and calponin homology domains 1 [Source:MGI Symbol;Acc:MGI:1924819]		TRUE	0.000349447	203	1857	34	0.0183091	0.167488	GO:0044306	GO:CC	neuron projection terminus	27262	2065
Limk2	LIM motif-containing protein kinase 2 [Source:MGI Symbol;Acc:MGI:1197517]		TRUE	0.000368785	79	1857	19	0.0102316	0.240506	GO:0008076	GO:CC	voltage-gated potassium channel complex	27262	493
Lix1	limb and CNS expressed 1 [Source:MGI Symbol;Acc:MGI:1913893]		TRUE	0.000372761	269	1857	41	0.0220786	0.152416	GO:0031514	GO:CC	motile cilium	27262	1154
Lmntd1	lamin tail domain containing 1 [Source:MGI Symbol;Acc:MGI:1921321]		TRUE	0.000410986	1139	1857	120	0.0646204	0.105356	GO:0009986	GO:CC	cell surface	27262	663
Lmo3	LIM domain only 3 [Source:MGI Symbol;Acc:MGI:102810]		TRUE	0.000456012	1381	1857	140	0.0753904	0.101376	GO:0031984	GO:CC	organelle subcompartment	27262	1233
Lncpint	long non-protein coding RNA, Trp53 induced transcript [Source:MGI Symbol;Acc:MGI:2673128]		TRUE	0.000549697	53	1857	15	0.00807754	0.283019	GO:0016469	GO:CC	proton-transporting two-sector ATPase complex	27262	745
Lnpep	leucyl/cystinyl aminopeptidase [Source:MGI Symbol;Acc:MGI:2387123]		TRUE	0.000637964	146	1857	27	0.0145396	0.184932	GO:1904949	GO:CC	ATPase complex	27262	3698
Lonrf2	LON peptidase N-terminal domain and ring finger 2 [Source:MGI Symbol;Acc:MGI:1920209]		TRUE	0.000654172	834	1857	93	0.0500808	0.111511	GO:0005815	GO:CC	microtubule organizing center	27262	368
Lpgat1	lysophosphatidylglycerol acyltransferase 1 [Source:MGI Symbol;Acc:MGI:2446186]		TRUE	0.000659774	41	1857	13	0.00700054	0.317073	GO:0008328	GO:CC	ionotropic glutamate receptor complex	27262	509
Lpin2	lipin 2 [Source:MGI Symbol;Acc:MGI:1891341]		TRUE	0.000929107	25	1857	10	0.00538503	0.4	GO:0005751	GO:CC	mitochondrial respiratory chain complex IV	27262	321
Lpp	LIM domain containing preferred translocation partner in lipoma [Source:MGI Symbol;Acc:MGI:2441849]		TRUE	0.00099253	319	1857	45	0.0242326	0.141066	GO:0019898	GO:CC	extrinsic component of membrane	27262	829
Lrba	LPS-responsive beige-like anchor [Source:MGI Symbol;Acc:MGI:1933162]		TRUE	0.00117711	31	1857	11	0.00592353	0.354839	GO:0098688	GO:CC	parallel fiber to Purkinje cell synapse	27262	3255
Lrch3	leucine-rich repeats and calponin homology (CH) domain containing 3 [Source:MGI Symbol;Acc:MGI:1917394]		TRUE	0.00118006	252	1857	38	0.0204631	0.150794	GO:0098858	GO:CC	actin-based cell projection	27262	3299
Lrig1	leucine-rich repeats and immunoglobulin-like domains 1 [Source:MGI Symbol;Acc:MGI:107935]		TRUE	0.00120449	43	1857	13	0.00700054	0.302326	GO:0098878	GO:CC	neurotransmitter receptor complex	27262	3306
Lrmda	leucine rich melanocyte differentiation associated [Source:MGI Symbol;Acc:MGI:1923883]		TRUE	0.00141754	26	1857	10	0.00538503	0.384615	GO:0043194	GO:CC	axon initial segment	27262	1869
Lrp1	low density lipoprotein receptor-related protein 1 [Source:MGI Symbol;Acc:MGI:96828]		TRUE	0.00150086	21	1857	9	0.00484653	0.428571	GO:0005753	GO:CC	mitochondrial proton-transporting ATP synthase complex	27262	322
Lrp1b	low density lipoprotein-related protein 1B [Source:MGI Symbol;Acc:MGI:2151136]		TRUE	0.00160159	439	1857	56	0.0301562	0.127563	GO:0016324	GO:CC	apical plasma membrane	27262	734
Lrrc19	leucine rich repeat containing 19 [Source:MGI Symbol;Acc:MGI:2140219]		TRUE	0.00178411	103	1857	21	0.0113086	0.203883	GO:0005901	GO:CC	caveola	27262	437
Lrrc36	leucine rich repeat containing 36 [Source:MGI Symbol;Acc:MGI:2448585]		TRUE	0.00208526	173	1857	29	0.0156166	0.16763	GO:0042383	GO:CC	sarcolemma	27262	1785
Lrrc43	leucine rich repeat containing 43 [Source:MGI Symbol;Acc:MGI:2685907]		TRUE	0.0021139	27	1857	10	0.00538503	0.37037	GO:0099524	GO:CC	postsynaptic cytosol	27262	3378
Lrrc45	leucine rich repeat containing 45 [Source:MGI Symbol;Acc:MGI:2387183]		TRUE	0.0021139	27	1857	10	0.00538503	0.37037	GO:0060077	GO:CC	inhibitory synapse	27262	2272
Lrrc4c	leucine rich repeat containing 4C [Source:MGI Symbol;Acc:MGI:2442636]		TRUE	0.0021139	27	1857	10	0.00538503	0.37037	GO:0033177	GO:CC	proton-transporting two-sector ATPase complex, proton-transporting domain	27262	1397
Lrrc6	leucine rich repeat containing 6 (testis) [Source:MGI Symbol;Acc:MGI:1859553]		TRUE	0.00230963	542	1857	65	0.0350027	0.119926	GO:0005743	GO:CC	mitochondrial inner membrane	27262	314
Lrrc7	leucine rich repeat containing 7 [Source:MGI Symbol;Acc:MGI:2676665]		TRUE	0.00234365	156	1857	27	0.0145396	0.173077	GO:0005875	GO:CC	microtubule associated complex	27262	415
Lrrc71	leucine rich repeat containing 71 [Source:MGI Symbol;Acc:MGI:1921735]		TRUE	0.00238614	22	1857	9	0.00484653	0.409091	GO:0045259	GO:CC	proton-transporting ATP synthase complex	27262	2166
Lrrc8a	leucine rich repeat containing 8A VRAC subunit A [Source:MGI Symbol;Acc:MGI:2652847]		TRUE	0.00297401	60	1857	15	0.00807754	0.25	GO:0030286	GO:CC	dynein complex	27262	926
Gm28035	predicted gene, 28035 [Source:MGI Symbol;Acc:MGI:5547771]		TRUE	0.00299754	302	1857	42	0.0226171	0.139073	GO:0098798	GO:CC	mitochondrial protein-containing complex	27262	3269
Lrrc9	leucine rich repeat containing 9 [Source:MGI Symbol;Acc:MGI:1925507]		TRUE	0.00308761	28	1857	10	0.00538503	0.357143	GO:0045277	GO:CC	respiratory chain complex IV	27262	2184
Lrriq1	leucine-rich repeats and IQ motif containing 1 [Source:MGI Symbol;Acc:MGI:1922228]		TRUE	0.00317303	75	1857	17	0.00915455	0.226667	GO:0032589	GO:CC	neuron projection membrane	27262	1322
Lrrk1	leucine-rich repeat kinase 1 [Source:MGI Symbol;Acc:MGI:2142227]		TRUE	0.00335103	150	1857	26	0.0140011	0.173333	GO:0030136	GO:CC	clathrin-coated vesicle	27262	915
Lsamp	limbic system-associated membrane protein [Source:MGI Symbol;Acc:MGI:1261760]		TRUE	0.00358051	881	1857	94	0.0506193	0.106697	GO:0030659	GO:CC	cytoplasmic vesicle membrane	27262	951
Ltbp1	latent transforming growth factor beta binding protein 1 [Source:MGI Symbol;Acc:MGI:109151]		TRUE	0.00373783	528	1857	63	0.0339257	0.119318	GO:0005667	GO:CC	transcription regulator complex	27262	262
Luc7l2	LUC7-like 2 (S. cerevisiae) [Source:MGI Symbol;Acc:MGI:2183260]		TRUE	0.00414619	41	1857	12	0.00646204	0.292683	GO:0044295	GO:CC	axonal growth cone	27262	2054
Luc7l3	LUC7-like 3 (S. cerevisiae) [Source:MGI Symbol;Acc:MGI:1914934]		TRUE	0.00421877	920	1857	97	0.0522348	0.105435	GO:0016604	GO:CC	nuclear body	27262	768
Luzp2	leucine zipper protein 2 [Source:MGI Symbol;Acc:MGI:1889615]		TRUE	0.00564392	903	1857	95	0.0511578	0.105205	GO:0012506	GO:CC	vesicle membrane	27262	690
Lxn	latexin [Source:MGI Symbol;Acc:MGI:107633]		TRUE	0.00576608	201	1857	31	0.0166936	0.154229	GO:0030055	GO:CC	cell-substrate junction	27262	872
Lysmd4	LysM, putative peptidoglycan-binding, domain containing 4 [Source:MGI Symbol;Acc:MGI:1922349]		TRUE	0.00590912	603	1857	69	0.0371567	0.114428	GO:0019866	GO:CC	organelle inner membrane	27262	826
Macf1	microtubule-actin crosslinking factor 1 [Source:MGI Symbol;Acc:MGI:108559]		TRUE	0.00731216	175	1857	28	0.0150781	0.16	GO:0036064	GO:CC	ciliary basal body	27262	1686
Macrod1	mono-ADP ribosylhydrolase 1 [Source:MGI Symbol;Acc:MGI:2147583]		TRUE	0.00812799	25	1857	9	0.00484653	0.36	GO:0097470	GO:CC	ribbon synapse	27262	3030
Macrod2	mono-ADP ribosylhydrolase 2 [Source:MGI Symbol;Acc:MGI:1920149]		TRUE	0.0116806	26	1857	9	0.00484653	0.346154	GO:0005858	GO:CC	axonemal dynein complex	27262	402
Magi1	membrane associated guanylate kinase, WW and PDZ domain containing 1 [Source:MGI Symbol;Acc:MGI:1203522]		TRUE	0.0136658	7322	1857	573	0.308562	0.0782573	GO:0032991	GO:CC	protein-containing complex	27262	1343
Magi2	membrane associated guanylate kinase, WW and PDZ domain containing 2 [Source:MGI Symbol;Acc:MGI:1354953]		TRUE	0.0141888	240	1857	34	0.0183091	0.141667	GO:0030135	GO:CC	coated vesicle	27262	914
Mamdc2	MAM domain containing 2 [Source:MGI Symbol;Acc:MGI:1918988]		TRUE	0.0147544	92	1857	18	0.00969305	0.195652	GO:0042641	GO:CC	actomyosin	27262	1819
Maml2	mastermind like transcriptional coactivator 2 [Source:MGI Symbol;Acc:MGI:2389460]		TRUE	0.0198694	94	1857	18	0.00969305	0.191489	GO:0016528	GO:CC	sarcoplasm	27262	754
Maml3	mastermind like transcriptional coactivator 3 [Source:MGI Symbol;Acc:MGI:2389461]		TRUE	0.020377	185	1857	28	0.0150781	0.151351	GO:0043679	GO:CC	axon terminus	27262	1964
Maob	monoamine oxidase B [Source:MGI Symbol;Acc:MGI:96916]		TRUE	0.0211587	70	1857	15	0.00807754	0.214286	GO:0030665	GO:CC	clathrin-coated vesicle membrane	27262	956
Map1b	microtubule-associated protein 1B [Source:MGI Symbol;Acc:MGI:1306778]		TRUE	0.0222371	948	1857	96	0.0516963	0.101266	GO:0005768	GO:CC	endosome	27262	336
Map1lc3a	microtubule-associated protein 1 light chain 3 alpha [Source:MGI Symbol;Acc:MGI:1915661]		TRUE	0.0223767	12	1857	6	0.00323102	0.5	GO:0000276	GO:CC	mitochondrial proton-transporting ATP synthase complex, coupling factor F(o)	27262	44
Map1lc3b	microtubule-associated protein 1 light chain 3 beta [Source:MGI Symbol;Acc:MGI:1914693]		TRUE	0.0228001	28	1857	9	0.00484653	0.321429	GO:0097440	GO:CC	apical dendrite	27262	3008
Map2	microtubule-associated protein 2 [Source:MGI Symbol;Acc:MGI:97175]		TRUE	0.0228001	28	1857	9	0.00484653	0.321429	GO:0099523	GO:CC	presynaptic cytosol	27262	3377
Map2k4	mitogen-activated protein kinase kinase 4 [Source:MGI Symbol;Acc:MGI:1346869]		TRUE	0.0244843	104	1857	19	0.0102316	0.182692	GO:0120111	GO:CC	neuron projection cytoplasm	27262	3471
Map2k5	mitogen-activated protein kinase kinase 5 [Source:MGI Symbol;Acc:MGI:1346345]		TRUE	0.025075	79	1857	16	0.00861605	0.202532	GO:0016234	GO:CC	inclusion body	27262	728
Map2k6	mitogen-activated protein kinase kinase 6 [Source:MGI Symbol;Acc:MGI:1346870]		TRUE	0.0251533	71	1857	15	0.00807754	0.211268	GO:0016529	GO:CC	sarcoplasmic reticulum	27262	755
Map4k3	mitogen-activated protein kinase kinase kinase kinase 3 [Source:MGI Symbol;Acc:MGI:2154405]		TRUE	0.02686	462	1857	54	0.0290792	0.116883	GO:0016607	GO:CC	nuclear speck	27262	771
Map7	microtubule-associated protein 7 [Source:MGI Symbol;Acc:MGI:1328328]		TRUE	0.0298783	189	1857	28	0.0150781	0.148148	GO:0097729	GO:CC	9+2 motile cilium	27262	3151
Mapk10	mitogen-activated protein kinase 10 [Source:MGI Symbol;Acc:MGI:1346863]		TRUE	0.0306241	6504	1857	511	0.275175	0.078567	GO:0043232	GO:CC	intracellular non-membrane-bounded organelle	27262	1889
Mapk15	mitogen-activated protein kinase 15 [Source:MGI Symbol;Acc:MGI:2652894]		TRUE	0.0308171	219	1857	31	0.0166936	0.141553	GO:0030658	GO:CC	transport vesicle membrane	27262	950
Mapk4	mitogen-activated protein kinase 4 [Source:MGI Symbol;Acc:MGI:2444559]		TRUE	0.0311061	6505	1857	511	0.275175	0.078555	GO:0043228	GO:CC	non-membrane-bounded organelle	27262	1885
Mapre2	microtubule-associated protein, RP/EB family, member 2 [Source:MGI Symbol;Acc:MGI:106271]		TRUE	0.0328032	190	1857	28	0.0150781	0.147368	GO:0005925	GO:CC	focal adhesion	27262	453
Mapt	microtubule-associated protein tau [Source:MGI Symbol;Acc:MGI:97180]		TRUE	0.0354835	5	1857	4	0.00215401	0.8	GO:0032983	GO:CC	kainate selective glutamate receptor complex	27262	1342
Marf1	meiosis regulator and mRNA stability 1 [Source:MGI Symbol;Acc:MGI:2444505]		TRUE	0.0354835	5	1857	4	0.00215401	0.8	GO:0005954	GO:CC	calcium- and calmodulin-dependent protein kinase complex	27262	475
Masp1	mannan-binding lectin serine peptidase 1 [Source:MGI Symbol;Acc:MGI:88492]		TRUE	0.0411041	359	1857	44	0.0236941	0.122563	GO:0098791	GO:CC	Golgi apparatus subcompartment	27262	3264
Mast4	microtubule associated serine/threonine kinase family member 4 [Source:MGI Symbol;Acc:MGI:1918885]		TRUE	0.0414212	108	1857	19	0.0102316	0.175926	GO:0005881	GO:CC	cytoplasmic microtubule	27262	419
Mbd5	methyl-CpG binding domain protein 5 [Source:MGI Symbol;Acc:MGI:2138934]		TRUE	0.0414449	66	1857	14	0.00753904	0.212121	GO:0005905	GO:CC	clathrin-coated pit	27262	440
Mbnl1	muscleblind like splicing factor 1 [Source:MGI Symbol;Acc:MGI:1928482]		TRUE	0.0420647	154	1857	24	0.0129241	0.155844	GO:0005814	GO:CC	centriole	27262	367
Mboat2	membrane bound O-acyltransferase domain containing 2 [Source:MGI Symbol;Acc:MGI:1914466]		TRUE	0.0441207	51	1857	12	0.00646204	0.235294	GO:0032590	GO:CC	dendrite membrane	27262	1323
Mbp	myelin basic protein [Source:MGI Symbol;Acc:MGI:96925]		TRUE	0.0454093	244	1857	33	0.0177706	0.135246	GO:0036464	GO:CC	cytoplasmic ribonucleoprotein granule	27262	1723
Mbtd1	mbt domain containing 1 [Source:MGI Symbol;Acc:MGI:2143977]		TRUE	0.0493222	1104	1857	107	0.0576198	0.0969203	GO:0042175	GO:CC	nuclear outer membrane-endoplasmic reticulum membrane network	27262	1782
Mcc	mutated in colorectal cancers [Source:MGI Symbol;Acc:MGI:96930]		TRUE	4.24022e-100	10491	1844	1210	0.656182	0.115337	GO:0005515	GO:MF	protein binding	25177	1496
Mcu	mitochondrial calcium uniporter [Source:MGI Symbol;Acc:MGI:3026965]		TRUE	2.06849e-64	16296	1844	1518	0.82321	0.0931517	GO:0005488	GO:MF	binding	25177	1484
Mcur1	mitochondrial calcium uniporter regulator 1 [Source:MGI Symbol;Acc:MGI:1923387]		TRUE	2.58756e-26	5979	1844	642	0.348156	0.107376	GO:0043167	GO:MF	ion binding	25177	5760
Mdga2	MAM domain containing glycosylphosphatidylinositol anchor 2 [Source:MGI Symbol;Acc:MGI:2444706]		TRUE	1.1324e-20	817	1844	144	0.0780911	0.176255	GO:0019904	GO:MF	protein domain specific binding	25177	3759
Mdm4	transformed mouse 3T3 cell double minute 4 [Source:MGI Symbol;Acc:MGI:107934]		TRUE	7.5222e-20	1011	1844	164	0.0889371	0.162216	GO:0008092	GO:MF	cytoskeletal protein binding	25177	1548
Mecp2	methyl CpG binding protein 2 [Source:MGI Symbol;Acc:MGI:99918]		TRUE	2.16938e-19	2313	1844	294	0.159436	0.127108	GO:0019899	GO:MF	enzyme binding	25177	3754
Med12l	mediator complex subunit 12-like [Source:MGI Symbol;Acc:MGI:2139916]		TRUE	1.01694e-17	454	1844	94	0.0509761	0.207048	GO:0060589	GO:MF	nucleoside-triphosphatase regulator activity	25177	8475
Mef2c	myocyte enhancer factor 2C [Source:MGI Symbol;Acc:MGI:99458]		TRUE	1.01694e-17	454	1844	94	0.0509761	0.207048	GO:0030695	GO:MF	GTPase regulator activity	25177	4018
Meg3	maternally expressed 3 [Source:MGI Symbol;Acc:MGI:1202886]		TRUE	1.13048e-15	4234	1844	451	0.244577	0.106519	GO:0043169	GO:MF	cation binding	25177	5762
Megf10	multiple EGF-like-domains 10 [Source:MGI Symbol;Acc:MGI:2685177]		TRUE	1.32804e-15	4132	1844	442	0.239696	0.10697	GO:0046872	GO:MF	metal ion binding	25177	6281
Meis1	Meis homeobox 1 [Source:MGI Symbol;Acc:MGI:104717]		TRUE	3.25723e-14	1675	1844	216	0.117137	0.128955	GO:0030554	GO:MF	adenyl nucleotide binding	25177	3975
Meis2	Meis homeobox 2 [Source:MGI Symbol;Acc:MGI:108564]		TRUE	4.19036e-14	2483	1844	291	0.157809	0.117197	GO:0043168	GO:MF	anion binding	25177	5761
Mertk	MER proto-oncogene tyrosine kinase [Source:MGI Symbol;Acc:MGI:96965]		TRUE	4.79862e-14	1485	1844	197	0.106833	0.13266	GO:0005524	GO:MF	ATP binding	25177	1504
Metap1d	methionyl aminopeptidase type 1D (mitochondrial) [Source:MGI Symbol;Acc:MGI:1913809]		TRUE	4.89989e-14	1557	1844	204	0.110629	0.131021	GO:0032559	GO:MF	adenyl ribonucleotide binding	25177	4489
Mettl24	methyltransferase like 24 [Source:MGI Symbol;Acc:MGI:3045338]		TRUE	8.94829e-13	1262	1844	171	0.0927332	0.135499	GO:0030234	GO:MF	enzyme regulator activity	25177	3885
Mfge8	milk fat globule EGF and factor V/VIII domain containing [Source:MGI Symbol;Acc:MGI:102768]		TRUE	1.64085e-12	524	1844	92	0.0498915	0.175573	GO:0022890	GO:MF	inorganic cation transmembrane transporter activity	25177	3841
Mfhas1	malignant fibrous histiocytoma amplified sequence 1 [Source:MGI Symbol;Acc:MGI:1098644]		TRUE	1.98398e-12	694	1844	111	0.0601952	0.159942	GO:0015075	GO:MF	monoatomic ion transmembrane transporter activity	25177	2306
Mfn1	mitofusin 1 [Source:MGI Symbol;Acc:MGI:1914664]		TRUE	2.77683e-12	643	1844	105	0.0569414	0.163297	GO:0015318	GO:MF	inorganic molecular entity transmembrane transporter activity	25177	2484
Mfsd2a	major facilitator superfamily domain containing 2A [Source:MGI Symbol;Acc:MGI:1923824]		TRUE	4.0687e-12	2194	1844	257	0.139371	0.117138	GO:1901265	GO:MF	nucleoside phosphate binding	25177	10971
Mga	MAX gene associated [Source:MGI Symbol;Acc:MGI:1352483]		TRUE	4.0687e-12	2194	1844	257	0.139371	0.117138	GO:0000166	GO:MF	nucleotide binding	25177	31
Mgat4c	MGAT4 family, member C [Source:MGI Symbol;Acc:MGI:1914819]		TRUE	1.04598e-11	2278	1844	263	0.142625	0.115452	GO:0097367	GO:MF	carbohydrate derivative binding	25177	9193
Mgat5	mannoside acetylglucosaminyltransferase 5 [Source:MGI Symbol;Acc:MGI:894701]		TRUE	1.07686e-11	2037	1844	241	0.130694	0.118311	GO:0017076	GO:MF	purine nucleotide binding	25177	3152
Mgst1	microsomal glutathione S-transferase 1 [Source:MGI Symbol;Acc:MGI:1913850]		TRUE	1.39906e-11	1836	1844	222	0.12039	0.120915	GO:0035639	GO:MF	purine ribonucleoside triphosphate binding	25177	5385
Mical2	microtubule associated monooxygenase, calponin and LIM domain containing 2 [Source:MGI Symbol;Acc:MGI:2444947]		TRUE	2.01914e-11	1918	1844	229	0.124187	0.119395	GO:0032555	GO:MF	purine ribonucleotide binding	25177	4485
Micu3	mitochondrial calcium uptake family, member 3 [Source:MGI Symbol;Acc:MGI:1925756]		TRUE	2.71558e-11	2065	1844	242	0.131236	0.117191	GO:0098772	GO:MF	molecular function regulator activity	25177	9275
Mid1	midline 1 [Source:MGI Symbol;Acc:MGI:1100537]		TRUE	3.17532e-11	1937	1844	230	0.124729	0.11874	GO:0032553	GO:MF	ribonucleotide binding	25177	4483
Mid1ip1	Mid1 interacting protein 1 (gastrulation specific G12-like (zebrafish)) [Source:MGI Symbol;Acc:MGI:1915291]		TRUE	7.1196e-11	566	1844	93	0.0504338	0.164311	GO:0008324	GO:MF	monoatomic cation transmembrane transporter activity	25177	1662
Mill2	MHC I like leukocyte 2 [Source:MGI Symbol;Acc:MGI:2179989]		TRUE	7.2125e-11	2631	1844	291	0.157809	0.110604	GO:0036094	GO:MF	small molecule binding	25177	5430
Mir100hg	Mir100 Mirlet7a-2 Mir125b-1 cluster host gene [Source:MGI Symbol;Acc:MGI:1920394]		TRUE	1.88205e-10	124	1844	36	0.0195228	0.290323	GO:0017124	GO:MF	SH3 domain binding	25177	3171
Mir124-2hg	Mir124-2 host gene (non-protein coding) [Source:MGI Symbol;Acc:MGI:1917691]		TRUE	2.13773e-10	1562	1844	192	0.104121	0.122919	GO:0044877	GO:MF	protein-containing complex binding	25177	6099
Mir9-3hg	Mir9-3 host gene [Source:MGI Symbol;Acc:MGI:2142071]		TRUE	9.22852e-10	483	1844	81	0.0439262	0.167702	GO:0022803	GO:MF	passive transmembrane transporter activity	25177	3791
Mitf	melanogenesis associated transcription factor [Source:MGI Symbol;Acc:MGI:104554]		TRUE	9.22852e-10	483	1844	81	0.0439262	0.167702	GO:0015267	GO:MF	channel activity	25177	2454
Mkln1	muskelin 1, intracellular mediator containing kelch motifs [Source:MGI Symbol;Acc:MGI:1351638]		TRUE	1.07041e-09	118	1844	34	0.0184382	0.288136	GO:0030165	GO:MF	PDZ domain binding	25177	3872
Mlc1	megalencephalic leukoencephalopathy with subcortical cysts 1 homolog (human) [Source:MGI Symbol;Acc:MGI:2157910]		TRUE	1.40024e-09	223	1844	49	0.0265727	0.219731	GO:0005085	GO:MF	guanyl-nucleotide exchange factor activity	25177	1274
Mlf2	myeloid leukemia factor 2 [Source:MGI Symbol;Acc:MGI:1353554]		TRUE	1.66357e-09	597	1844	93	0.0504338	0.155779	GO:0004672	GO:MF	protein kinase activity	25177	977
Mlh3	mutL homolog 3 [Source:MGI Symbol;Acc:MGI:1353455]		TRUE	1.70008e-09	767	1844	111	0.0601952	0.14472	GO:0140678	GO:MF	molecular function inhibitor activity	25177	10738
Mllt10	myeloid/lymphoid or mixed-lineage leukemia; translocated to, 10 [Source:MGI Symbol;Acc:MGI:1329038]		TRUE	2.1058e-09	867	1844	121	0.0656182	0.139562	GO:0019900	GO:MF	kinase binding	25177	3755
Mllt3	myeloid/lymphoid or mixed-lineage leukemia; translocated to, 3 [Source:MGI Symbol;Acc:MGI:1917372]		TRUE	3.8652e-09	700	1844	103	0.0558568	0.147143	GO:0016773	GO:MF	phosphotransferase activity, alcohol group as acceptor	25177	2984
Mmp14	matrix metallopeptidase 14 (membrane-inserted) [Source:MGI Symbol;Acc:MGI:101900]		TRUE	6.41753e-09	1312	1844	163	0.0883948	0.124238	GO:0140677	GO:MF	molecular function activator activity	25177	10737
Mobp	myelin-associated oligodendrocytic basic protein [Source:MGI Symbol;Acc:MGI:108511]		TRUE	8.53352e-09	777	1844	110	0.0596529	0.14157	GO:0019901	GO:MF	protein kinase binding	25177	3756
Mok	MOK protein kinase [Source:MGI Symbol;Acc:MGI:1336881]		TRUE	1.27511e-08	244	1844	50	0.027115	0.204918	GO:0005096	GO:MF	GTPase activator activity	25177	1280
Morn1	MORN repeat containing 1 [Source:MGI Symbol;Acc:MGI:1924116]		TRUE	1.52777e-08	429	1844	72	0.0390456	0.167832	GO:0005216	GO:MF	monoatomic ion channel activity	25177	1359
Mphosph9	M-phase phosphoprotein 9 [Source:MGI Symbol;Acc:MGI:2443138]		TRUE	1.62688e-08	1170	1844	148	0.0802603	0.126496	GO:0005215	GO:MF	transporter activity	25177	1358
Mpped1	metallophosphoesterase domain containing 1 [Source:MGI Symbol;Acc:MGI:106316]		TRUE	1.89011e-08	2334	1844	254	0.137744	0.108826	GO:0042802	GO:MF	identical protein binding	25177	5683
Mpped2	metallophosphoesterase domain containing 2 [Source:MGI Symbol;Acc:MGI:1924265]		TRUE	2.00408e-08	778	1844	109	0.0591106	0.140103	GO:0016301	GO:MF	kinase activity	25177	2776
Mroh7	maestro heat-like repeat family member 7 [Source:MGI Symbol;Acc:MGI:2685873]		TRUE	2.6783e-08	5729	1844	535	0.29013	0.0933845	GO:0003824	GO:MF	catalytic activity	25177	368
Mrps33	mitochondrial ribosomal protein S33 [Source:MGI Symbol;Acc:MGI:1338046]		TRUE	8.33908e-08	374	1844	64	0.0347072	0.171123	GO:0015631	GO:MF	tubulin binding	25177	2668
Mrps6	mitochondrial ribosomal protein S6 [Source:MGI Symbol;Acc:MGI:2153111]		TRUE	1.94405e-07	426	1844	69	0.0374187	0.161972	GO:0046873	GO:MF	metal ion transmembrane transporter activity	25177	6282
Msantd2	Myb/SANT-like DNA-binding domain containing 2 [Source:MGI Symbol;Acc:MGI:2384579]		TRUE	2.42902e-07	567	1844	84	0.0455531	0.148148	GO:1901702	GO:MF	salt transmembrane transporter activity	25177	10998
Msi2	musashi RNA-binding protein 2 [Source:MGI Symbol;Acc:MGI:1923876]		TRUE	3.02951e-07	316	1844	56	0.0303688	0.177215	GO:0005261	GO:MF	monoatomic cation channel activity	25177	1388
Msmo1	methylsterol monoxygenase 1 [Source:MGI Symbol;Acc:MGI:1913484]		TRUE	3.74236e-07	2336	1844	248	0.13449	0.106164	GO:0140096	GO:MF	catalytic activity, acting on a protein	25177	10574
Mt1	metallothionein 1 [Source:MGI Symbol;Acc:MGI:97171]		TRUE	5.25603e-07	312	1844	55	0.0298265	0.176282	GO:0022836	GO:MF	gated channel activity	25177	3805
Mt2	metallothionein 2 [Source:MGI Symbol;Acc:MGI:97172]		TRUE	5.71964e-07	1071	1844	133	0.0721258	0.124183	GO:0022857	GO:MF	transmembrane transporter activity	25177	3819
Mt3	metallothionein 3 [Source:MGI Symbol;Acc:MGI:97173]		TRUE	9.10117e-07	308	1844	54	0.0292842	0.175325	GO:0022839	GO:MF	monoatomic ion gated channel activity	25177	3806
Mta3	metastasis associated 3 [Source:MGI Symbol;Acc:MGI:2151172]		TRUE	1.03107e-06	2292	1844	242	0.131236	0.105585	GO:0016740	GO:MF	transferase activity	25177	2956
Mtf2	metal response element binding transcription factor 2 [Source:MGI Symbol;Acc:MGI:105050]		TRUE	1.03578e-06	292	1844	52	0.0281996	0.178082	GO:0050839	GO:MF	cell adhesion molecule binding	25177	7987
Mthfs	5, 10-methenyltetrahydrofolate synthetase [Source:MGI Symbol;Acc:MGI:1340032]		TRUE	1.14924e-06	453	1844	70	0.037961	0.154525	GO:0003779	GO:MF	actin binding	25177	361
Mtmr3	myotubularin related protein 3 [Source:MGI Symbol;Acc:MGI:1921552]		TRUE	1.64911e-06	262	1844	48	0.0260304	0.183206	GO:0008017	GO:MF	microtubule binding	25177	1527
Mtss2	MTSS I-BAR domain containing 2 [Source:MGI Symbol;Acc:MGI:3039591]		TRUE	1.75793e-06	439	1844	68	0.0368764	0.154897	GO:0004674	GO:MF	protein serine/threonine kinase activity	25177	979
Mttp	microsomal triglyceride transfer protein [Source:MGI Symbol;Acc:MGI:106926]		TRUE	1.96682e-06	332	1844	56	0.0303688	0.168675	GO:0106310	GO:MF	protein serine kinase activity	25177	10408
Mtus1	mitochondrial tumor suppressor 1 [Source:MGI Symbol;Acc:MGI:2142572]		TRUE	2.17313e-06	874	1844	112	0.0607375	0.128146	GO:0008289	GO:MF	lipid binding	25177	1647
Mvd	mevalonate (diphospho) decarboxylase [Source:MGI Symbol;Acc:MGI:2179327]		TRUE	2.26003e-06	97	1844	26	0.0140998	0.268041	GO:0008013	GO:MF	beta-catenin binding	25177	1526
Mycbp	MYC binding protein [Source:MGI Symbol;Acc:MGI:1891750]		TRUE	2.81193e-06	548	1844	79	0.0428416	0.144161	GO:0008047	GO:MF	enzyme activator activity	25177	1536
Mycbpap	MYCBP associated protein [Source:MGI Symbol;Acc:MGI:2388726]		TRUE	4.92091e-06	939	1844	117	0.063449	0.124601	GO:0016772	GO:MF	transferase activity, transferring phosphorus-containing groups	25177	2983
Myl6	myosin, light polypeptide 6, alkali, smooth muscle and non-muscle [Source:MGI Symbol;Acc:MGI:109318]		TRUE	6.5301e-06	27	1844	13	0.00704989	0.481481	GO:0051959	GO:MF	dynein light intermediate chain binding	25177	8143
Mylip	myosin regulatory light chain interacting protein [Source:MGI Symbol;Acc:MGI:2388271]		TRUE	6.57639e-06	231	1844	43	0.0233189	0.186147	GO:0019902	GO:MF	phosphatase binding	25177	3757
Myo18a	myosin XVIIIA [Source:MGI Symbol;Acc:MGI:2667185]		TRUE	7.09982e-06	19	1844	11	0.00596529	0.578947	GO:0004970	GO:MF	ionotropic glutamate receptor activity	25177	1213
Myo6	myosin VI [Source:MGI Symbol;Acc:MGI:104785]		TRUE	1.01838e-05	643	1844	87	0.04718	0.135303	GO:0008134	GO:MF	transcription factor binding	25177	1575
Myo9a	myosin IXa [Source:MGI Symbol;Acc:MGI:107735]		TRUE	2.78667e-05	617	1844	83	0.0450108	0.134522	GO:0003682	GO:MF	chromatin binding	25177	328
Myorg	myogenesis regulating glycosidase (putative) [Source:MGI Symbol;Acc:MGI:2140300]		TRUE	2.94954e-05	138	1844	30	0.016269	0.217391	GO:0099106	GO:MF	ion channel regulator activity	25177	9302
Myrip	myosin VIIA and Rab interacting protein [Source:MGI Symbol;Acc:MGI:2384407]		TRUE	3.00789e-05	1813	1844	193	0.104664	0.106453	GO:0140110	GO:MF	transcription regulator activity	25177	10583
Naa16	N(alpha)-acetyltransferase 16, NatA auxiliary subunit [Source:MGI Symbol;Acc:MGI:1914147]		TRUE	3.01375e-05	1699	1844	183	0.0992408	0.10771	GO:0005102	GO:MF	signaling receptor binding	25177	1281
Naca	nascent polypeptide-associated complex alpha polypeptide [Source:MGI Symbol;Acc:MGI:106095]		TRUE	3.16885e-05	146	1844	31	0.0168113	0.212329	GO:0016247	GO:MF	channel regulator activity	25177	2757
Nalcn	sodium leak channel, non-selective [Source:MGI Symbol;Acc:MGI:2444306]		TRUE	6.11962e-05	720	1844	92	0.0498915	0.127778	GO:0005509	GO:MF	calcium ion binding	25177	1495
Nap1l5	nucleosome assembly protein 1-like 5 [Source:MGI Symbol;Acc:MGI:1923555]		TRUE	6.29647e-05	182	1844	35	0.0189805	0.192308	GO:0019903	GO:MF	protein phosphatase binding	25177	3758
Napb	N-ethylmaleimide sensitive fusion protein attachment protein beta [Source:MGI Symbol;Acc:MGI:104562]		TRUE	7.29735e-05	27	1844	12	0.00650759	0.444444	GO:0008066	GO:MF	glutamate receptor activity	25177	1539
Nat8f1	N-acetyltransferase 8 (GCN5-related) family member 1 [Source:MGI Symbol;Acc:MGI:1913366]		TRUE	0.000242037	192	1844	35	0.0189805	0.182292	GO:0005244	GO:MF	voltage-gated monoatomic ion channel activity	25177	1376
Nat8f3	N-acetyltransferase 8 (GCN5-related) family member 3 [Source:MGI Symbol;Acc:MGI:2136449]		TRUE	0.000275117	193	1844	35	0.0189805	0.181347	GO:0022832	GO:MF	voltage-gated channel activity	25177	3802
Nat8f6	N-acetyltransferase 8 (GCN5-related) family member 6 [Source:MGI Symbol;Acc:MGI:3779382]		TRUE	0.000300685	355	1844	53	0.0287419	0.149296	GO:0042578	GO:MF	phosphoric ester hydrolase activity	25177	5661
Nat8f7	N-acetyltransferase 8 (GCN5-related) family member 7 [Source:MGI Symbol;Acc:MGI:3782661]		TRUE	0.000399806	66	1844	18	0.00976139	0.272727	GO:0003777	GO:MF	microtubule motor activity	25177	360
Nat8l	N-acetyltransferase 8-like [Source:MGI Symbol;Acc:MGI:2447776]		TRUE	0.000421784	139	1844	28	0.0151844	0.201439	GO:0022834	GO:MF	ligand-gated channel activity	25177	3803
Nav3	neuron navigator 3 [Source:MGI Symbol;Acc:MGI:2183703]		TRUE	0.000488641	156	1844	30	0.016269	0.192308	GO:0015079	GO:MF	potassium ion transmembrane transporter activity	25177	2308
Nbea	neurobeachin [Source:MGI Symbol;Acc:MGI:1347075]		TRUE	0.000885237	136	1844	27	0.0146421	0.198529	GO:0015276	GO:MF	ligand-gated monoatomic ion channel activity	25177	2460
Nbl1	NBL1, DAN family BMP antagonist [Source:MGI Symbol;Acc:MGI:104591]		TRUE	0.000928305	476	1844	64	0.0347072	0.134454	GO:0005543	GO:MF	phospholipid binding	25177	1514
Ncam1	neural cell adhesion molecule 1 [Source:MGI Symbol;Acc:MGI:97281]		TRUE	0.000984364	33	1844	12	0.00650759	0.363636	GO:0098918	GO:MF	structural constituent of synapse	25177	9286
Ncam2	neural cell adhesion molecule 2 [Source:MGI Symbol;Acc:MGI:97282]		TRUE	0.00107138	57	1844	16	0.00867679	0.280702	GO:0099529	GO:MF	neurotransmitter receptor activity involved in regulation of postsynaptic membrane potential	25177	9319
Ncan	neurocan [Source:MGI Symbol;Acc:MGI:104694]		TRUE	0.00136786	189	1844	33	0.0178959	0.174603	GO:0005516	GO:MF	calmodulin binding	25177	1497
Ncoa1	nuclear receptor coactivator 1 [Source:MGI Symbol;Acc:MGI:1276523]		TRUE	0.00137943	58	1844	16	0.00867679	0.275862	GO:0019829	GO:MF	ATPase-coupled monoatomic cation transmembrane transporter activity	25177	3734
Ncoa2	nuclear receptor coactivator 2 [Source:MGI Symbol;Acc:MGI:1276533]		TRUE	0.00245063	20	1844	9	0.00488069	0.45	GO:0008569	GO:MF	minus-end-directed microtubule motor activity	25177	1800
Ncoa6	nuclear receptor coactivator 6 [Source:MGI Symbol;Acc:MGI:1929915]		TRUE	0.00283596	61	1844	16	0.00867679	0.262295	GO:0022835	GO:MF	transmitter-gated channel activity	25177	3804
Ncoa7	nuclear receptor coactivator 7 [Source:MGI Symbol;Acc:MGI:2444847]		TRUE	0.00283596	61	1844	16	0.00867679	0.262295	GO:0022824	GO:MF	transmitter-gated monoatomic ion channel activity	25177	3798
Ncor2	nuclear receptor co-repressor 2 [Source:MGI Symbol;Acc:MGI:1337080]		TRUE	0.00283644	1598	1844	164	0.0889371	0.102628	GO:0043565	GO:MF	sequence-specific DNA binding	25177	5822
Ndrg2	N-myc downstream regulated gene 2 [Source:MGI Symbol;Acc:MGI:1352498]		TRUE	0.00293578	575	1844	72	0.0390456	0.125217	GO:0140657	GO:MF	ATP-dependent activity	25177	10725
Ndufa12	NADH:ubiquinone oxidoreductase subunit A12 [Source:MGI Symbol;Acc:MGI:1913664]		TRUE	0.00411154	147	1844	27	0.0146421	0.183673	GO:0044325	GO:MF	transmembrane transporter binding	25177	6038
Ndufa13	NADH:ubiquinone oxidoreductase subunit A13 [Source:MGI Symbol;Acc:MGI:1914434]		TRUE	0.00435286	217	1844	35	0.0189805	0.16129	GO:0022853	GO:MF	active monoatomic ion transmembrane transporter activity	25177	3816
Ndufa3	NADH:ubiquinone oxidoreductase subunit A3 [Source:MGI Symbol;Acc:MGI:1913341]		TRUE	0.00476901	50	1844	14	0.00759219	0.28	GO:0019894	GO:MF	kinesin binding	25177	3753
Ndufa4	Ndufa4, mitochondrial complex associated [Source:MGI Symbol;Acc:MGI:107686]		TRUE	0.00488941	2411	1844	231	0.125271	0.0958109	GO:0003677	GO:MF	DNA binding	25177	324
Ndufa6	NADH:ubiquinone oxidoreductase subunit A6 [Source:MGI Symbol;Acc:MGI:1914380]		TRUE	0.00488958	140	1844	26	0.0140998	0.185714	GO:0019838	GO:MF	growth factor binding	25177	3736
Ndufa7	NADH:ubiquinone oxidoreductase subunit A7 [Source:MGI Symbol;Acc:MGI:1913666]		TRUE	0.0051978	44	1844	13	0.00704989	0.295455	GO:0045505	GO:MF	dynein intermediate chain binding	25177	6165
Ndufab1	NADH:ubiquinone oxidoreductase subunit AB1 [Source:MGI Symbol;Acc:MGI:1917566]		TRUE	0.0055014	1350	1844	141	0.0764642	0.104444	GO:0003700	GO:MF	DNA-binding transcription factor activity	25177	338
Ndufaf4	NADH:ubiquinone oxidoreductase complex assembly factor 4 [Source:MGI Symbol;Acc:MGI:1915743]		TRUE	0.00559459	1111	1844	120	0.0650759	0.108011	GO:0000978	GO:MF	RNA polymerase II cis-regulatory region sequence-specific DNA binding	25177	117
Ndufc2	NADH:ubiquinone oxidoreductase subunit C2 [Source:MGI Symbol;Acc:MGI:1344370]		TRUE	0.00568702	1134	1844	122	0.0661605	0.107584	GO:0000987	GO:MF	cis-regulatory region sequence-specific DNA binding	25177	120
Nebl	nebulette [Source:MGI Symbol;Acc:MGI:1921353]		TRUE	0.00609069	1147	1844	123	0.0667028	0.107236	GO:0046983	GO:MF	protein dimerization activity	25177	6324
Necab3	N-terminal EF-hand calcium binding protein 3 [Source:MGI Symbol;Acc:MGI:1861721]		TRUE	0.00696002	33	1844	11	0.00596529	0.333333	GO:0140358	GO:MF	P-type transmembrane transporter activity	25177	10635
Nectin1	nectin cell adhesion molecule 1 [Source:MGI Symbol;Acc:MGI:1926483]		TRUE	0.00757577	1428	1844	147	0.079718	0.102941	GO:0001067	GO:MF	transcription regulatory region nucleic acid binding	25177	151
Nedd4	neural precursor cell expressed, developmentally down-regulated 4 [Source:MGI Symbol;Acc:MGI:97297]		TRUE	0.00800556	119	1844	23	0.0124729	0.193277	GO:0005267	GO:MF	potassium channel activity	25177	1390
Nedd4l	neural precursor cell expressed, developmentally down-regulated gene 4-like [Source:MGI Symbol;Acc:MGI:1933754]		TRUE	0.00932678	112	1844	22	0.0119306	0.196429	GO:0003774	GO:MF	cytoskeletal motor activity	25177	359
Nedd8	neural precursor cell expressed, developmentally down-regulated gene 8 [Source:MGI Symbol;Acc:MGI:97301]		TRUE	0.00964938	1493	1844	152	0.0824295	0.101808	GO:1990837	GO:MF	sequence-specific double-stranded DNA binding	25177	11218
Negr1	neuronal growth regulator 1 [Source:MGI Symbol;Acc:MGI:2444846]		TRUE	0.00974436	23	1844	9	0.00488069	0.391304	GO:0031690	GO:MF	adrenergic receptor binding	25177	4189
Nek11	NIMA (never in mitosis gene a)-related expressed kinase 11 [Source:MGI Symbol;Acc:MGI:2442276]		TRUE	0.0119664	75	1844	17	0.00921909	0.226667	GO:0019905	GO:MF	syntaxin binding	25177	3760
Nek5	NIMA (never in mitosis gene a)-related expressed kinase 5 [Source:MGI Symbol;Acc:MGI:2142824]		TRUE	0.0125696	1280	1844	133	0.0721258	0.103906	GO:0000981	GO:MF	DNA-binding transcription factor activity, RNA polymerase II-specific	25177	119
Neo1	neogenin [Source:MGI Symbol;Acc:MGI:1097159]		TRUE	0.0149614	1424	1844	145	0.0786334	0.101826	GO:0000976	GO:MF	transcription cis-regulatory region binding	25177	115
Nfat5	nuclear factor of activated T cells 5 [Source:MGI Symbol;Acc:MGI:1859333]		TRUE	0.015652	55	1844	14	0.00759219	0.254545	GO:1904315	GO:MF	transmitter-gated monoatomic ion channel activity involved in regulation of postsynaptic membrane potential	25177	11051
Nfatc3	nuclear factor of activated T cells, cytoplasmic, calcineurin dependent 3 [Source:MGI Symbol;Acc:MGI:103296]		TRUE	0.016337	141	1844	25	0.0135575	0.177305	GO:0004713	GO:MF	protein tyrosine kinase activity	25177	1005
Nfia	nuclear factor I/A [Source:MGI Symbol;Acc:MGI:108056]		TRUE	0.0166878	510	1844	63	0.0341649	0.123529	GO:0001228	GO:MF	DNA-binding transcription activator activity, RNA polymerase II-specific	25177	185
Nfib	nuclear factor I/B [Source:MGI Symbol;Acc:MGI:103188]		TRUE	0.0182688	1325	1844	136	0.0737527	0.102642	GO:0000977	GO:MF	RNA polymerase II transcription regulatory region sequence-specific DNA binding	25177	116
Nfic	nuclear factor I/C [Source:MGI Symbol;Acc:MGI:109591]		TRUE	0.0184444	748	1844	85	0.0460954	0.113636	GO:0008270	GO:MF	zinc ion binding	25177	1641
Nfyc	nuclear transcription factor-Y gamma [Source:MGI Symbol;Acc:MGI:107901]		TRUE	0.0186181	49	1844	13	0.00704989	0.265306	GO:0005246	GO:MF	calcium channel regulator activity	25177	1378
Ngef	neuronal guanine nucleotide exchange factor [Source:MGI Symbol;Acc:MGI:1858414]		TRUE	0.0195881	319	1844	44	0.0238612	0.137931	GO:0031625	GO:MF	ubiquitin protein ligase binding	25177	4176
Nhs	NHS actin remodeling regulator [Source:MGI Symbol;Acc:MGI:2684894]		TRUE	0.0213002	25	1844	9	0.00488069	0.36	GO:0099186	GO:MF	structural constituent of postsynapse	25177	9311
Nhsl1	NHS-like 1 [Source:MGI Symbol;Acc:MGI:106390]		TRUE	0.0217354	152	1844	26	0.0140998	0.171053	GO:0015081	GO:MF	sodium ion transmembrane transporter activity	25177	2310
Nim1k	NIM1 serine/threonine protein kinase [Source:MGI Symbol;Acc:MGI:2442399]		TRUE	0.0223385	110	1844	21	0.0113883	0.190909	GO:0000149	GO:MF	SNARE binding	25177	27
Nipbl	NIPBL cohesin loading factor [Source:MGI Symbol;Acc:MGI:1913976]		TRUE	0.0227867	321	1844	44	0.0238612	0.137072	GO:0051020	GO:MF	GTPase binding	25177	8002
Nkain4	Na+/K+ transporting ATPase interacting 4 [Source:MGI Symbol;Acc:MGI:1915372]		TRUE	0.0237009	516	1844	63	0.0341649	0.122093	GO:0001216	GO:MF	DNA-binding transcription activator activity	25177	179
Nktr	natural killer tumor recognition sequence [Source:MGI Symbol;Acc:MGI:97346]		TRUE	0.0238089	20	1844	8	0.00433839	0.4	GO:0099507	GO:MF	ligand-gated monoatomic ion channel activity involved in regulation of presynaptic membrane potential	25177	9312
Nkx2-1	NK2 homeobox 1 [Source:MGI Symbol;Acc:MGI:108067]		TRUE	0.0267017	72	1844	16	0.00867679	0.222222	GO:0098960	GO:MF	postsynaptic neurotransmitter receptor activity	25177	9288
Nkx2-2	NK2 homeobox 2 [Source:MGI Symbol;Acc:MGI:97347]		TRUE	0.0267017	72	1844	16	0.00867679	0.222222	GO:0005230	GO:MF	extracellular ligand-gated monoatomic ion channel activity	25177	1370
Nkx2-2os	NK2 homeobox 2, opposite strand [Source:MGI Symbol;Acc:MGI:3652259]		TRUE	0.0268381	128	1844	23	0.0124729	0.179688	GO:0015085	GO:MF	calcium ion transmembrane transporter activity	25177	2312
Nkx2-4	NK2 homeobox 4 [Source:MGI Symbol;Acc:MGI:97349]		TRUE	0.0284809	137	1844	24	0.0130152	0.175182	GO:0001221	GO:MF	transcription coregulator binding	25177	181
Nkx6-2	NK6 homeobox 2 [Source:MGI Symbol;Acc:MGI:1352738]		TRUE	0.0285752	65	1844	15	0.00813449	0.230769	GO:0001540	GO:MF	amyloid-beta binding	25177	195
Nlgn1	neuroligin 1 [Source:MGI Symbol;Acc:MGI:2179435]		TRUE	0.0288483	80	1844	17	0.00921909	0.2125	GO:0019199	GO:MF	transmembrane receptor protein kinase activity	25177	3673
Nlk	nemo like kinase [Source:MGI Symbol;Acc:MGI:1201387]		TRUE	0.0300663	88	1844	18	0.00976139	0.204545	GO:0008081	GO:MF	phosphoric diester hydrolase activity	25177	1544
Nme1	NME/NM23 nucleoside diphosphate kinase 1 [Source:MGI Symbol;Acc:MGI:97355]		TRUE	0.033498	554	1844	66	0.0357918	0.119134	GO:0060090	GO:MF	molecular adaptor activity	25177	8466
Nme2	NME/NM23 nucleoside diphosphate kinase 2 [Source:MGI Symbol;Acc:MGI:97356]		TRUE	0.0361644	139	1844	24	0.0130152	0.172662	GO:0022843	GO:MF	voltage-gated monoatomic cation channel activity	25177	3810
Nmnat2	nicotinamide nucleotide adenylyltransferase 2 [Source:MGI Symbol;Acc:MGI:2444155]		TRUE	0.0365214	16	1844	7	0.0037961	0.4375	GO:0046933	GO:MF	proton-transporting ATP synthase activity, rotational mechanism	25177	6301
Nmur2	neuromedin U receptor 2 [Source:MGI Symbol;Acc:MGI:2441765]		TRUE	0.0373452	1593	1844	157	0.085141	0.0985562	GO:0003690	GO:MF	double-stranded DNA binding	25177	332
Nnat	neuronatin [Source:MGI Symbol;Acc:MGI:104716]		TRUE	0.040038	39	1844	11	0.00596529	0.282051	GO:0140658	GO:MF	ATP-dependent chromatin remodeler activity	25177	10726
Nol4	nucleolar protein 4 [Source:MGI Symbol;Acc:MGI:2441684]		TRUE	0.040038	39	1844	11	0.00596529	0.282051	GO:0140938	GO:MF	histone H3 methyltransferase activity	25177	10893
Nos1ap	nitric oxide synthase 1 (neuronal) adaptor protein [Source:MGI Symbol;Acc:MGI:1917979]		TRUE	0.0408437	339	1844	45	0.0244035	0.132743	GO:0044389	GO:MF	ubiquitin-like protein ligase binding	25177	6044
Notch1	notch 1 [Source:MGI Symbol;Acc:MGI:97363]		TRUE	0.0425161	484	1844	59	0.0319957	0.121901	GO:0003712	GO:MF	transcription coregulator activity	25177	341
Nova1	NOVA alternative splicing regulator 1 [Source:MGI Symbol;Acc:MGI:104297]		TRUE	0.0427353	27	1844	9	0.00488069	0.333333	GO:0017147	GO:MF	Wnt-protein binding	25177	3179
Npas2	neuronal PAS domain protein 2 [Source:MGI Symbol;Acc:MGI:109232]		TRUE	0.0438979	115	1844	21	0.0113883	0.182609	GO:0015078	GO:MF	proton transmembrane transporter activity	25177	2307
Npas3	neuronal PAS domain protein 3 [Source:MGI Symbol;Acc:MGI:1351610]		TRUE	0.0452907	53	1844	13	0.00704989	0.245283	GO:0001222	GO:MF	transcription corepressor binding	25177	182
Npc2	NPC intracellular cholesterol transporter 2 [Source:MGI Symbol;Acc:MGI:1915213]		TRUE	8.69323e-10	537	603	121	0.200663	0.225326	HP:0000729	HP	Autistic behavior	4965	568
Nr1d1	nuclear receptor subfamily 1, group D, member 1 [Source:MGI Symbol;Acc:MGI:2444210]		TRUE	1.56306e-09	2654	603	403	0.668325	0.151846	HP:0011446	HP	Abnormality of higher mental function	4965	7856
Nr1d2	nuclear receptor subfamily 1, group D, member 2 [Source:MGI Symbol;Acc:MGI:2449205]		TRUE	1.00789e-08	3547	603	499	0.827529	0.140682	HP:0012638	HP	Abnormal nervous system physiology	4965	9029
Nr2f2	nuclear receptor subfamily 2, group F, member 2 [Source:MGI Symbol;Acc:MGI:1352452]		TRUE	1.97939e-08	1915	603	309	0.512438	0.161358	HP:0001249	HP	Intellectual disability	4965	950
Nr3c1	nuclear receptor subfamily 3, group C, member 1 [Source:MGI Symbol;Acc:MGI:95824]		TRUE	2.58771e-08	2744	603	409	0.678275	0.149052	HP:0012759	HP	Neurodevelopmental abnormality	4965	9149
Nr3c2	nuclear receptor subfamily 3, group C, member 2 [Source:MGI Symbol;Acc:MGI:99459]		TRUE	3.85773e-07	1845	603	295	0.489221	0.159892	HP:0000708	HP	Behavioral abnormality	4965	551
Nr4a1	nuclear receptor subfamily 4, group A, member 1 [Source:MGI Symbol;Acc:MGI:1352454]		TRUE	1.29377e-06	1027	603	184	0.305141	0.179163	HP:0002463	HP	Language impairment	4965	1790
Nrarp	Notch-regulated ankyrin repeat protein [Source:MGI Symbol;Acc:MGI:1914372]		TRUE	1.35066e-06	999	603	180	0.298507	0.18018	HP:0000750	HP	Delayed speech and language development	4965	586
Nrbp2	nuclear receptor binding protein 2 [Source:MGI Symbol;Acc:MGI:2385017]		TRUE	1.3741e-06	2062	603	320	0.53068	0.155189	HP:0003808	HP	Abnormal muscle tone	4965	2689
Nrcam	neuronal cell adhesion molecule [Source:MGI Symbol;Acc:MGI:104750]		TRUE	2.05147e-06	489	603	104	0.172471	0.212679	HP:0000752	HP	Hyperactivity	4965	588
Nrf1	nuclear respiratory factor 1 [Source:MGI Symbol;Acc:MGI:1332235]		TRUE	4.20939e-06	1599	603	259	0.429519	0.161976	HP:0002167	HP	Neurological speech impairment	4965	1595
Nrg2	neuregulin 2 [Source:MGI Symbol;Acc:MGI:1098246]		TRUE	8.36462e-06	2400	603	358	0.593698	0.149167	HP:0011804	HP	Abnormal muscle physiology	4965	8210
Nrp1	neuropilin 1 [Source:MGI Symbol;Acc:MGI:106206]		TRUE	3.82255e-05	2753	603	397	0.658375	0.144206	HP:0003011	HP	Abnormality of the musculature	4965	2177
Nrxn1	neurexin I [Source:MGI Symbol;Acc:MGI:1096391]		TRUE	7.91535e-05	1862	603	287	0.475954	0.154135	HP:0001250	HP	Seizure	4965	951
Nrxn3	neurexin III [Source:MGI Symbol;Acc:MGI:1096389]		TRUE	0.000104669	420	603	88	0.145937	0.209524	HP:0000736	HP	Short attention span	4965	573
Nsd2	nuclear receptor binding SET domain protein 2 [Source:MGI Symbol;Acc:MGI:1276574]		TRUE	0.000356533	1753	603	270	0.447761	0.154022	HP:0001252	HP	Hypotonia	4965	953
Nsdhl	NAD(P) dependent steroid dehydrogenase-like [Source:MGI Symbol;Acc:MGI:1099438]		TRUE	0.000372691	2283	603	336	0.557214	0.147175	HP:0012758	HP	Neurodevelopmental delay	4965	9148
Nsf	N-ethylmaleimide sensitive fusion protein [Source:MGI Symbol;Acc:MGI:104560]		TRUE	0.000392786	349	603	75	0.124378	0.2149	HP:0007018	HP	Attention deficit hyperactivity disorder	4965	4546
Nsmce2	NSE2/MMS21 homolog, SMC5-SMC6 complex SUMO ligase [Source:MGI Symbol;Acc:MGI:1915751]		TRUE	0.000621335	3879	603	517	0.85738	0.133282	HP:0000707	HP	Abnormality of the nervous system	4965	550
Nt5c2	5'-nucleotidase, cytosolic II [Source:MGI Symbol;Acc:MGI:2178563]		TRUE	0.000671806	2567	603	369	0.61194	0.143748	HP:0009121	HP	Abnormal axial skeleton morphology	4965	5677
Nt5dc1	5'-nucleotidase domain containing 1 [Source:MGI Symbol;Acc:MGI:2442446]		TRUE	0.000840993	111	603	33	0.0547264	0.297297	HP:0200134	HP	Epileptic encephalopathy	4965	16014
Ntm	neurotrimin [Source:MGI Symbol;Acc:MGI:2446259]		TRUE	0.0023904	358	603	74	0.12272	0.206704	HP:0020219	HP	Motor seizure	4965	9459
Ntn1	netrin 1 [Source:MGI Symbol;Acc:MGI:105088]		TRUE	0.00267485	296	603	64	0.106136	0.216216	HP:0011182	HP	Interictal epileptiform activity	4965	7598
Ntng2	netrin G2 [Source:MGI Symbol;Acc:MGI:2159341]		TRUE	0.00302729	297	603	64	0.106136	0.215488	HP:0025373	HP	Interictal EEG abnormality	4965	9809
Ntrk3	neurotrophic tyrosine kinase, receptor, type 3 [Source:MGI Symbol;Acc:MGI:97385]		TRUE	0.00365125	190	603	46	0.0762852	0.242105	HP:0002133	HP	Status epilepticus	4965	1567
Ntsr2	neurotensin receptor 2 [Source:MGI Symbol;Acc:MGI:108018]		TRUE	0.00394029	2278	603	330	0.547264	0.144864	HP:0000929	HP	Abnormal skull morphology	4965	727
Nwd1	NACHT and WD repeat domain containing 1 [Source:MGI Symbol;Acc:MGI:2442268]		TRUE	0.00774508	866	603	146	0.242123	0.168591	HP:0001270	HP	Motor delay	4965	967
Nxn	nucleoredoxin [Source:MGI Symbol;Acc:MGI:109331]		TRUE	0.00835496	1117	603	180	0.298507	0.161146	HP:0000549	HP	Abnormal conjugate eye movement	4965	422
Nxpe4	neurexophilin and PC-esterase domain family, member 4 [Source:MGI Symbol;Acc:MGI:1924792]		TRUE	0.00874066	469	603	89	0.147595	0.189765	HP:0000494	HP	Downslanted palpebral fissures	4965	377
Oat	ornithine aminotransferase [Source:MGI Symbol;Acc:MGI:97394]		TRUE	0.00893096	190	603	45	0.0746269	0.236842	HP:0100660	HP	Dyskinesia	4965	15653
Ocrl	OCRL, inositol polyphosphate-5-phosphatase [Source:MGI Symbol;Acc:MGI:109589]		TRUE	0.0105357	532	603	98	0.162521	0.184211	HP:0030178	HP	Abnormality of central nervous system electrophysiology	4965	10315
Odf2	outer dense fiber of sperm tails 2 [Source:MGI Symbol;Acc:MGI:1098824]		TRUE	0.0126378	3652	603	487	0.807629	0.133352	HP:0033127	HP	Abnormality of the musculoskeletal system	4965	13120
Odf3b	outer dense fiber of sperm tails 3B [Source:MGI Symbol;Acc:MGI:1917363]		TRUE	0.01334	1028	603	167	0.276949	0.162451	HP:0000422	HP	Abnormal nasal bridge morphology	4965	327
Ogdhl	oxoglutarate dehydrogenase-like [Source:MGI Symbol;Acc:MGI:3616088]		TRUE	0.018808	778	603	132	0.218905	0.169666	HP:0001290	HP	Generalized hypotonia	4965	982
Ogt	O-linked N-acetylglucosamine (GlcNAc) transferase (UDP-N-acetylglucosamine:polypeptide-N-acetylglucosaminyl transferase) [Source:MGI Symbol;Acc:MGI:1339639]		TRUE	0.0214964	1988	603	290	0.480929	0.145875	HP:0000006	HP	Autosomal dominant inheritance	4965	5
Olfml1	olfactomedin-like 1 [Source:MGI Symbol;Acc:MGI:2679264]		TRUE	0.0219729	295	603	61	0.101161	0.20678	HP:0007359	HP	Focal-onset seizure	4965	4701
Olig1	oligodendrocyte transcription factor 1 [Source:MGI Symbol;Acc:MGI:1355334]		TRUE	0.0248329	2995	603	411	0.681592	0.137229	HP:0011842	HP	Abnormal skeletal morphology	4965	8247
Olig2	oligodendrocyte transcription factor 2 [Source:MGI Symbol;Acc:MGI:1355331]		TRUE	0.0259404	106	603	29	0.0480929	0.273585	HP:0032792	HP	Tonic seizure	4965	12790
Omg	oligodendrocyte myelin glycoprotein [Source:MGI Symbol;Acc:MGI:106586]		TRUE	0.0274869	388	603	75	0.124378	0.193299	HP:0006919	HP	Abnormal aggressive, impulsive or violent behavior	4965	4497
Opa1	OPA1, mitochondrial dynamin like GTPase [Source:MGI Symbol;Acc:MGI:1921393]		TRUE	0.027527	762	603	129	0.21393	0.169291	HP:0100851	HP	Abnormal emotion/affect behavior	4965	15820
Osbpl9	oxysterol binding protein-like 9 [Source:MGI Symbol;Acc:MGI:1923784]		TRUE	0.0315272	504	603	92	0.15257	0.18254	HP:0002353	HP	EEG abnormality	4965	1727
Otud7a	OTU domain containing 7A [Source:MGI Symbol;Acc:MGI:2158505]		TRUE	0.0321878	205	603	46	0.0762852	0.22439	HP:0011146	HP	Dialeptic seizure	4965	7567
Otx1	orthodenticle homeobox 1 [Source:MGI Symbol;Acc:MGI:97450]		TRUE	0.0398657	1121	603	177	0.293532	0.157895	HP:0010993	HP	Abnormal cerebral subcortex morphology	4965	7418
Otx2	orthodenticle homeobox 2 [Source:MGI Symbol;Acc:MGI:97451]		TRUE	0.043611	690	603	118	0.195688	0.171014	HP:0031466	HP	Impairment in personality functioning	4965	11526
Otx2os1	orthodenticle homeobox 2 opposite strand 1 [Source:MGI Symbol;Acc:MGI:3583292]		TRUE	0.0440468	67	603	21	0.0348259	0.313433	HP:0025336	HP	Delayed ability to sit	4965	9775
Oxt	oxytocin [Source:MGI Symbol;Acc:MGI:97453]		TRUE	0.0452847	334	603	66	0.109453	0.197605	HP:0001268	HP	Mental deterioration	4965	965
P2ry12	purinergic receptor P2Y, G-protein coupled 12 [Source:MGI Symbol;Acc:MGI:1918089]		TRUE	0.0486157	1117	603	176	0.291874	0.157565	HP:0000290	HP	Abnormality of the forehead	4965	239
P2ry14	purinergic receptor P2Y, G-protein coupled, 14 [Source:MGI Symbol;Acc:MGI:2155705]		TRUE	6.09113e-09	204	820	50	0.0609756	0.245098	KEGG:05415	KEGG	Diabetic cardiomyopathy	8947	485
Pabpn1	poly(A) binding protein, nuclear 1 [Source:MGI Symbol;Acc:MGI:1859158]		TRUE	7.29929e-09	469	820	87	0.106098	0.185501	KEGG:05022	KEGG	Pathways of neurodegeneration - multiple diseases	8947	410
Padi2	peptidyl arginine deiminase, type II [Source:MGI Symbol;Acc:MGI:1338892]		TRUE	2.22008e-08	300	820	63	0.0768293	0.21	KEGG:05016	KEGG	Huntington disease	8947	407
Pan3	PAN3 poly(A) specific ribonuclease subunit [Source:MGI Symbol;Acc:MGI:1919837]		TRUE	1.8412e-07	133	820	36	0.0439024	0.270677	KEGG:00190	KEGG	Oxidative phosphorylation	8947	18
Pank1	pantothenate kinase 1 [Source:MGI Symbol;Acc:MGI:1922985]		TRUE	3.25639e-07	220	820	49	0.0597561	0.222727	KEGG:05208	KEGG	Chemical carcinogenesis - reactive oxygen species	8947	453
Pantr1	POU domain, class 3, transcription factor 3 adjacent noncoding transcript 1 [Source:MGI Symbol;Acc:MGI:1913547]		TRUE	1.806e-06	113	820	31	0.0378049	0.274336	KEGG:04724	KEGG	Glutamatergic synapse	8947	348
Pantr2	POU domain, class 3, transcription factor 3 adjacent noncoding transcript 2 [Source:MGI Symbol;Acc:MGI:1913870]		TRUE	2.5384e-06	262	820	53	0.0646341	0.20229	KEGG:05012	KEGG	Parkinson disease	8947	405
Paqr6	progestin and adipoQ receptor family member VI [Source:MGI Symbol;Acc:MGI:1916207]		TRUE	3.44571e-06	98	820	28	0.0341463	0.285714	KEGG:04713	KEGG	Circadian entrainment	8947	342
Paqr8	progestin and adipoQ receptor family member VIII [Source:MGI Symbol;Acc:MGI:1921479]		TRUE	4.33835e-06	266	820	53	0.0646341	0.199248	KEGG:05020	KEGG	Prion disease	8947	409
Pard3	par-3 family cell polarity regulator [Source:MGI Symbol;Acc:MGI:2135608]		TRUE	1.28106e-05	366	820	65	0.0792683	0.177596	KEGG:05014	KEGG	Amyotrophic lateral sclerosis	8947	406
Pard3b	par-3 family cell polarity regulator beta [Source:MGI Symbol;Acc:MGI:1919301]		TRUE	2.41487e-05	228	820	46	0.0560976	0.201754	KEGG:04714	KEGG	Thermogenesis	8947	343
Pard3bos1	par-3 family cell polarity regulator beta, opposite strand 1 [Source:MGI Symbol;Acc:MGI:1921911]		TRUE	3.53994e-05	181	820	39	0.047561	0.21547	KEGG:04360	KEGG	Axon guidance	8947	299
Parp8	poly (ADP-ribose) polymerase family, member 8 [Source:MGI Symbol;Acc:MGI:1098713]		TRUE	3.67522e-05	134	820	32	0.0390244	0.238806	KEGG:04728	KEGG	Dopaminergic synapse	8947	352
Parvb	parvin, beta [Source:MGI Symbol;Acc:MGI:2153063]		TRUE	5.31882e-05	380	820	65	0.0792683	0.171053	KEGG:05010	KEGG	Alzheimer disease	8947	404
Paxbp1	PAX3 and PAX7 binding protein 1 [Source:MGI Symbol;Acc:MGI:1914617]		TRUE	0.000135788	90	820	24	0.0292683	0.266667	KEGG:04912	KEGG	GnRH signaling pathway	8947	362
Pbx1	pre B cell leukemia homeobox 1 [Source:MGI Symbol;Acc:MGI:97495]		TRUE	0.000214764	86	820	23	0.0280488	0.267442	KEGG:04911	KEGG	Insulin secretion	8947	361
Pcca	propionyl-Coenzyme A carboxylase, alpha polypeptide [Source:MGI Symbol;Acc:MGI:97499]		TRUE	0.000243583	152	820	33	0.0402439	0.217105	KEGG:04921	KEGG	Oxytocin signaling pathway	8947	371
Pcdh11x	protocadherin 11 X-linked [Source:MGI Symbol;Acc:MGI:2442849]		TRUE	0.000269517	75	820	21	0.0256098	0.28	KEGG:04971	KEGG	Gastric acid secretion	8947	395
Pcdh17	protocadherin 17 [Source:MGI Symbol;Acc:MGI:2684924]		TRUE	0.00036206	101	820	25	0.0304878	0.247525	KEGG:04925	KEGG	Aldosterone synthesis and secretion	8947	375
Pcdh7	protocadherin 7 [Source:MGI Symbol;Acc:MGI:1860487]		TRUE	0.000408267	89	820	23	0.0280488	0.258427	KEGG:04727	KEGG	GABAergic synapse	8947	351
Pcdh9	protocadherin 9 [Source:MGI Symbol;Acc:MGI:1306801]		TRUE	0.000500641	171	820	35	0.0426829	0.204678	KEGG:04310	KEGG	Wnt signaling pathway	8947	293
Pced1b	PC-esterase domain containing 1B [Source:MGI Symbol;Acc:MGI:2446270]		TRUE	0.000665618	240	820	44	0.0536585	0.183333	KEGG:04020	KEGG	Calcium signaling pathway	8947	245
Pclo	piccolo (presynaptic cytomatrix protein) [Source:MGI Symbol;Acc:MGI:1349390]		TRUE	0.000796106	86	820	22	0.0268293	0.255814	KEGG:04540	KEGG	Gap junction	8947	312
Pcm1	pericentriolar material 1 [Source:MGI Symbol;Acc:MGI:1277958]		TRUE	0.000807167	146	820	31	0.0378049	0.212329	KEGG:04723	KEGG	Retrograde endocannabinoid signaling	8947	347
Pcsk1n	proprotein convertase subtilisin/kexin type 1 inhibitor [Source:MGI Symbol;Acc:MGI:1353431]		TRUE	0.00129341	223	820	41	0.05	0.183857	KEGG:04024	KEGG	cAMP signaling pathway	8947	247
Pcsk2	proprotein convertase subtilisin/kexin type 2 [Source:MGI Symbol;Acc:MGI:97512]		TRUE	0.00167964	71	820	19	0.0231707	0.267606	KEGG:04520	KEGG	Adherens junction	8947	310
Pcx	pyruvate carboxylase [Source:MGI Symbol;Acc:MGI:97520]		TRUE	0.00190439	117	820	26	0.0317073	0.222222	KEGG:04935	KEGG	Growth hormone synthesis, secretion and action	8947	385
Pcyt2	phosphate cytidylyltransferase 2, ethanolamine [Source:MGI Symbol;Acc:MGI:1915921]		TRUE	0.00196262	1610	820	193	0.235366	0.119876	KEGG:01100	KEGG	Metabolic pathways	8947	181
Pde10a	phosphodiesterase 10A [Source:MGI Symbol;Acc:MGI:1345143]		TRUE	0.00206211	104	820	24	0.0292683	0.230769	KEGG:04922	KEGG	Glucagon signaling pathway	8947	372
Pde4d	phosphodiesterase 4D, cAMP specific [Source:MGI Symbol;Acc:MGI:99555]		TRUE	0.0027817	86	820	21	0.0256098	0.244186	KEGG:04970	KEGG	Salivary secretion	8947	394
Pde7b	phosphodiesterase 7B [Source:MGI Symbol;Acc:MGI:1352752]		TRUE	0.00331438	68	820	18	0.0219512	0.264706	KEGG:05031	KEGG	Amphetamine addiction	8947	412
Pde8b	phosphodiesterase 8B [Source:MGI Symbol;Acc:MGI:2443999]		TRUE	0.00335651	87	820	21	0.0256098	0.241379	KEGG:04260	KEGG	Cardiac muscle contraction	8947	290
Pde9a	phosphodiesterase 9A [Source:MGI Symbol;Acc:MGI:1277179]		TRUE	0.00577345	90	820	21	0.0256098	0.233333	KEGG:05032	KEGG	Morphine addiction	8947	413
Pdgfd	platelet-derived growth factor, D polypeptide [Source:MGI Symbol;Acc:MGI:1919035]		TRUE	0.00603046	214	820	38	0.0463415	0.17757	KEGG:04015	KEGG	Rap1 signaling pathway	8947	243
Pdgfrb	platelet derived growth factor receptor, beta polypeptide [Source:MGI Symbol;Acc:MGI:97531]		TRUE	0.0064899	154	820	30	0.0365854	0.194805	KEGG:04932	KEGG	Non-alcoholic fatty liver disease	8947	382
Pdss2	prenyl (solanesyl) diphosphate synthase, subunit 2 [Source:MGI Symbol;Acc:MGI:1918615]		TRUE	0.00750077	112	820	24	0.0292683	0.214286	KEGG:04725	KEGG	Cholinergic synapse	8947	349
Pdzph1	PDZ and pleckstrin homology domains 1 [Source:MGI Symbol;Acc:MGI:1916489]		TRUE	0.00805277	66	820	17	0.0207317	0.257576	KEGG:04720	KEGG	Long-term potentiation	8947	344
Peak1	pseudopodium-enriched atypical kinase 1 [Source:MGI Symbol;Acc:MGI:2442366]		TRUE	0.00830316	134	820	27	0.0329268	0.201493	KEGG:04915	KEGG	Estrogen signaling pathway	8947	365
Pebp1	phosphatidylethanolamine binding protein 1 [Source:MGI Symbol;Acc:MGI:1344408]		TRUE	0.00994822	100	820	22	0.0268293	0.22	KEGG:04916	KEGG	Melanogenesis	8947	366
Peg3	paternally expressed 3 [Source:MGI Symbol;Acc:MGI:104748]		TRUE	0.0108139	204	820	36	0.0439024	0.176471	KEGG:05205	KEGG	Proteoglycans in cancer	8947	450
Per2	period circadian clock 2 [Source:MGI Symbol;Acc:MGI:1195265]		TRUE	0.0176398	34	820	11	0.0134146	0.323529	KEGG:04710	KEGG	Circadian rhythm	8947	339
Per3	period circadian clock 3 [Source:MGI Symbol;Acc:MGI:1277134]		TRUE	0.0182028	155	820	29	0.0353659	0.187097	KEGG:04261	KEGG	Adrenergic signaling in cardiomyocytes	8947	291
Pfkfb4	6-phosphofructo-2-kinase/fructose-2,6-biphosphatase 4 [Source:MGI Symbol;Acc:MGI:2687284]		TRUE	0.020203	543	820	75	0.0914634	0.138122	KEGG:05200	KEGG	Pathways in cancer	8947	446
Pfn1	profilin 1 [Source:MGI Symbol;Acc:MGI:97549]		TRUE	0.0203875	84	820	19	0.0231707	0.22619	KEGG:04012	KEGG	ErbB signaling pathway	8947	240
Pgm1	phosphoglucomutase 1 [Source:MGI Symbol;Acc:MGI:97565]		TRUE	0.0233979	120	820	24	0.0292683	0.2	KEGG:04919	KEGG	Thyroid hormone signaling pathway	8947	369
Pgp	phosphoglycolate phosphatase [Source:MGI Symbol;Acc:MGI:1914328]		TRUE	0.0331907	101	820	21	0.0256098	0.207921	KEGG:04933	KEGG	AGE-RAGE signaling pathway in diabetic complications	8947	383
Phactr1	phosphatase and actin regulator 1 [Source:MGI Symbol;Acc:MGI:2659021]		TRUE	0.0399992	162	820	29	0.0353659	0.179012	KEGG:04934	KEGG	Cushing syndrome	8947	384
Phactr2	phosphatase and actin regulator 2 [Source:MGI Symbol;Acc:MGI:2446138]		TRUE	0.0499499	141	820	26	0.0317073	0.184397	KEGG:05017	KEGG	Spinocerebellar ataxia	8947	408
Phactr3	phosphatase and actin regulator 3 [Source:MGI Symbol;Acc:MGI:1921439]		TRUE	4.71986e-08	309	1091	89	0.0815765	0.288026	MIRNA:mmu-miR-223-3p	MIRNA	mmu-miR-223-3p	7220	1339
Phf21a	PHD finger protein 21A [Source:MGI Symbol;Acc:MGI:2384756]		TRUE	4.74332e-08	477	1091	123	0.112741	0.257862	MIRNA:mmu-miR-181a-5p	MIRNA	mmu-miR-181a-5p	7220	1191
Phf21b	PHD finger protein 21B [Source:MGI Symbol;Acc:MGI:2443812]		TRUE	2.56861e-07	453	1091	116	0.106324	0.256071	MIRNA:mmu-miR-7b-5p	MIRNA	mmu-miR-7b-5p	7220	1993
Phf3	PHD finger protein 3 [Source:MGI Symbol;Acc:MGI:2446126]		TRUE	5.94019e-06	524	1091	125	0.114574	0.23855	MIRNA:mmu-miR-9-5p	MIRNA	mmu-miR-9-5p	7220	2026
Phgdh	3-phosphoglycerate dehydrogenase [Source:MGI Symbol;Acc:MGI:1355330]		TRUE	0.000522545	293	1091	74	0.0678277	0.25256	MIRNA:mmu-miR-136-5p	MIRNA	mmu-miR-136-5p	7220	1153
Phka1	phosphorylase kinase alpha 1 [Source:MGI Symbol;Acc:MGI:97576]		TRUE	0.000654807	152	1091	45	0.0412466	0.296053	MIRNA:mmu-miR-190a-5p	MIRNA	mmu-miR-190a-5p	7220	1230
Phkb	phosphorylase kinase beta [Source:MGI Symbol;Acc:MGI:97578]		TRUE	0.00101744	414	1091	96	0.0879927	0.231884	MIRNA:mmu-miR-17-5p	MIRNA	mmu-miR-17-5p	7220	1190
Phkg1	phosphorylase kinase gamma 1 [Source:MGI Symbol;Acc:MGI:97579]		TRUE	0.00107723	518	1091	115	0.105408	0.222008	MIRNA:mmu-miR-15a-5p	MIRNA	mmu-miR-15a-5p	7220	1185
Phldb2	pleckstrin homology like domain, family B, member 2 [Source:MGI Symbol;Acc:MGI:2444981]		TRUE	0.00170153	302	1091	74	0.0678277	0.245033	MIRNA:mmu-miR-541-5p	MIRNA	mmu-miR-541-5p	7220	1774
Phlpp1	PH domain and leucine rich repeat protein phosphatase 1 [Source:MGI Symbol;Acc:MGI:2138327]		TRUE	0.00772181	390	1091	88	0.0806599	0.225641	MIRNA:mmu-miR-301b-3p	MIRNA	mmu-miR-301b-3p	7220	1394
Phpt1	phosphohistidine phosphatase 1 [Source:MGI Symbol;Acc:MGI:1922704]		TRUE	0.0109402	350	1091	80	0.0733272	0.228571	MIRNA:mmu-let-7b-5p	MIRNA	mmu-let-7b-5p	7220	1078
Phyhipl	phytanoyl-CoA hydroxylase interacting protein-like [Source:MGI Symbol;Acc:MGI:1918161]		TRUE	0.0211269	351	1091	79	0.0724106	0.225071	MIRNA:mmu-miR-324-3p	MIRNA	mmu-miR-324-3p	7220	1499
Pid1	phosphotyrosine interaction domain containing 1 [Source:MGI Symbol;Acc:MGI:2138391]		TRUE	0.0295735	404	1091	88	0.0806599	0.217822	MIRNA:mmu-miR-425-5p	MIRNA	mmu-miR-425-5p	7220	1615
Pik3r1	phosphoinositide-3-kinase regulatory subunit 1 [Source:MGI Symbol;Acc:MGI:97583]		TRUE	4.90819e-07	307	823	65	0.0789793	0.211726	REAC:R-MMU-112316	REAC	Neuronal System	8362	921
Pip4k2a	phosphatidylinositol-5-phosphate 4-kinase, type II, alpha [Source:MGI Symbol;Acc:MGI:1298206]		TRUE	2.18327e-06	191	823	46	0.0558931	0.240838	REAC:R-MMU-112315	REAC	Transmission across Chemical Synapses	8362	1608
Pipox	pipecolic acid oxidase [Source:MGI Symbol;Acc:MGI:1197006]		TRUE	0.000871849	130	823	31	0.0376671	0.238462	REAC:R-MMU-112314	REAC	Neurotransmitter receptors and postsynaptic signal transmission	8362	924
Pitpnc1	phosphatidylinositol transfer protein, cytoplasmic 1 [Source:MGI Symbol;Acc:MGI:1919045]		TRUE	0.000892916	76	823	22	0.0267315	0.289474	REAC:R-MMU-9013148	REAC	CDC42 GTPase cycle	8362	205
Pitpnm2	phosphatidylinositol transfer protein, membrane-associated 2 [Source:MGI Symbol;Acc:MGI:1336192]		TRUE	0.00104996	373	823	65	0.0789793	0.174263	REAC:R-MMU-9012999	REAC	RHO GTPase cycle	8362	1126
Pitpnm3	PITPNM family member 3 [Source:MGI Symbol;Acc:MGI:2685726]		TRUE	0.00121034	113	823	28	0.0340219	0.247788	REAC:R-MMU-163200	REAC	Respiratory electron transport, ATP synthesis by chemiosmotic coupling, and heat production by uncoupling proteins.	8362	1289
Pitx2	paired-like homeodomain transcription factor 2 [Source:MGI Symbol;Acc:MGI:109340]		TRUE	0.00210947	28	823	12	0.0145808	0.428571	REAC:R-MMU-191273	REAC	Cholesterol biosynthesis	8362	272
Pknox2	Pbx/knotted 1 homeobox 2 [Source:MGI Symbol;Acc:MGI:2445415]		TRUE	0.0036611	152	823	33	0.0400972	0.217105	REAC:R-MMU-9013149	REAC	RAC1 GTPase cycle	8362	1117
Pla2g10	phospholipase A2, group X [Source:MGI Symbol;Acc:MGI:1347522]		TRUE	0.00386435	25	823	11	0.0133657	0.44	REAC:R-MMU-399721	REAC	Glutamate binding, activation of AMPA receptors and synaptic plasticity	8362	589
Pla2g7	phospholipase A2, group VII (platelet-activating factor acetylhydrolase, plasma) [Source:MGI Symbol;Acc:MGI:1351327]		TRUE	0.00386435	25	823	11	0.0133657	0.44	REAC:R-MMU-399719	REAC	Trafficking of AMPA receptors	8362	1577
Plat	plasminogen activator, tissue [Source:MGI Symbol;Acc:MGI:97610]		TRUE	0.00677826	547	823	84	0.102066	0.153565	REAC:R-MMU-194315	REAC	Signaling by Rho GTPases	8362	1414
Plcb1	phospholipase C, beta 1 [Source:MGI Symbol;Acc:MGI:97613]		TRUE	0.010777	562	823	85	0.103281	0.151246	REAC:R-MMU-9716542	REAC	Signaling by Rho GTPases, Miro GTPases and RHOBTB3	8362	1415
Plcb4	phospholipase C, beta 4 [Source:MGI Symbol;Acc:MGI:107464]		TRUE	0.0136264	48	823	15	0.018226	0.3125	REAC:R-MMU-193648	REAC	NRAGE signals death through JNK	8362	896
Plce1	phospholipase C, epsilon 1 [Source:MGI Symbol;Acc:MGI:1921305]		TRUE	0.020651	20	823	9	0.0109356	0.45	REAC:R-MMU-438066	REAC	Unblocking of NMDA receptors, glutamate binding and activation	8362	1643
Plcl1	phospholipase C-like 1 [Source:MGI Symbol;Acc:MGI:3036262]		TRUE	0.0246282	92	823	22	0.0267315	0.23913	REAC:R-MMU-5576891	REAC	Cardiac conduction	8362	237
Plcl2	phospholipase C-like 2 [Source:MGI Symbol;Acc:MGI:1352756]		TRUE	0.0371361	17	823	8	0.00972053	0.470588	REAC:R-MMU-163210	REAC	Formation of ATP by chemiosmotic coupling	8362	500
Pld5	phospholipase D family, member 5 [Source:MGI Symbol;Acc:MGI:2442056]		TRUE	0.0371361	17	823	8	0.00972053	0.470588	REAC:R-MMU-8949613	REAC	Cristae formation	8362	319
Plekhg1	pleckstrin homology domain containing, family G (with RhoGef domain) member 1 [Source:MGI Symbol;Acc:MGI:2676551]		TRUE	9.05559e-83	12095	1851	1414	0.763911	0.116908	TF:M00716_1	TF	Factor: ZF5; motif: GSGCGCGR; match class: 1	21866	3825
Plekhm2	pleckstrin homology domain containing, family M (with RUN domain) member 2 [Source:MGI Symbol;Acc:MGI:1916832]		TRUE	7.71977e-81	14870	1851	1606	0.867639	0.108003	TF:M00716	TF	Factor: ZF5; motif: GSGCGCGR	21866	3824
Plekho2	pleckstrin homology domain containing, family O member 2 [Source:MGI Symbol;Acc:MGI:2143132]		TRUE	1.71005e-78	11225	1851	1337	0.722312	0.119109	TF:M00333_1	TF	Factor: ZF5; motif: NRNGNGCGCGCWN; match class: 1	21866	3827
Plk2	polo like kinase 2 [Source:MGI Symbol;Acc:MGI:1099790]		TRUE	1.34946e-72	12803	1851	1444	0.780119	0.112786	TF:M04662_1	TF	Factor: FOXN4; motif: NNWANNCGWMCGCGTCNNNNMT; match class: 1	21866	1157
Plp1	proteolipid protein (myelin) 1 [Source:MGI Symbol;Acc:MGI:97623]		TRUE	6.73947e-72	9530	1851	1182	0.638574	0.124029	TF:M02933	TF	Factor: ZF5; motif: GYCGCGCARNGCNN	21866	3838
Plppr5	phospholipid phosphatase related 5 [Source:MGI Symbol;Acc:MGI:1923019]		TRUE	3.12068e-71	10450	1851	1257	0.679092	0.120287	TF:M00803	TF	Factor: E2F; motif: GGCGSG	21866	774
Plscr4	phospholipid scramblase 4 [Source:MGI Symbol;Acc:MGI:2143267]		TRUE	8.50352e-71	7664	1851	1015	0.548352	0.132437	TF:M01104	TF	Factor: MOVO-B; motif: GNGGGGG	21866	2110
Plxdc2	plexin domain containing 2 [Source:MGI Symbol;Acc:MGI:1914698]		TRUE	6.38408e-70	12027	1851	1379	0.745003	0.114659	TF:M01240_1	TF	Factor: BEN; motif: CAGCGRNV; match class: 1	21866	279
Plxna4	plexin A4 [Source:MGI Symbol;Acc:MGI:2179061]		TRUE	1.40941e-69	14509	1851	1559	0.842247	0.107451	TF:M00333	TF	Factor: ZF5; motif: NRNGNGCGCGCWN	21866	3826
Plxnc1	plexin C1 [Source:MGI Symbol;Acc:MGI:1890127]		TRUE	8.05155e-68	14275	1851	1539	0.831442	0.107811	TF:M10209	TF	Factor: E2F-1; motif: GNGGGCGGGRMN	21866	728
Pmepa1	prostate transmembrane protein, androgen induced 1 [Source:MGI Symbol;Acc:MGI:1929600]		TRUE	2.33913e-65	9378	1851	1152	0.622366	0.122841	TF:M08995_1	TF	Factor: CTCF; motif: NAGGGGGCGCNNKNNNN; match class: 1	21866	613
Pnisr	PNN interacting serine/arginine-rich [Source:MGI Symbol;Acc:MGI:1913875]		TRUE	4.10168e-64	16031	1851	1648	0.89033	0.102801	TF:M04662	TF	Factor: FOXN4; motif: NNWANNCGWMCGCGTCNNNNMT	21866	1156
Pou2f1	POU domain, class 2, transcription factor 1 [Source:MGI Symbol;Acc:MGI:101898]		TRUE	5.55601e-61	16273	1851	1657	0.895192	0.101825	TF:M01240	TF	Factor: BEN; motif: CAGCGRNV	21866	278
Pou3f2	POU domain, class 3, transcription factor 2 [Source:MGI Symbol;Acc:MGI:101895]		TRUE	8.09539e-61	7063	1851	933	0.504052	0.132097	TF:M00803_1	TF	Factor: E2F; motif: GGCGSG; match class: 1	21866	775
Pou3f3	POU domain, class 3, transcription factor 3 [Source:MGI Symbol;Acc:MGI:102564]		TRUE	3.29248e-59	7425	1851	962	0.519719	0.129562	TF:M10375_1	TF	Factor: Sp1; motif: GGNGGGGGNGGGGGMGGGGCNGGG; match class: 1	21866	3227
Pou3f4	POU domain, class 3, transcription factor 4 [Source:MGI Symbol;Acc:MGI:101894]		TRUE	2.37126e-58	14373	1851	1524	0.823339	0.106032	TF:M08995	TF	Factor: CTCF; motif: NAGGGGGCGCNNKNNNN	21866	612
Ppargc1a	peroxisome proliferative activated receptor, gamma, coactivator 1 alpha [Source:MGI Symbol;Acc:MGI:1342774]		TRUE	4.93491e-58	10657	1851	1239	0.669368	0.116262	TF:M10209_1	TF	Factor: E2F-1; motif: GNGGGCGGGRMN; match class: 1	21866	729
Ppia	peptidylprolyl isomerase A [Source:MGI Symbol;Acc:MGI:97749]		TRUE	5.07123e-57	9992	1851	1181	0.638033	0.118195	TF:M10276_1	TF	Factor: Kaiso; motif: SARNYCTCGCGAGAN; match class: 1	21866	3791
Ppil6	peptidylprolyl isomerase (cyclophilin)-like 6 [Source:MGI Symbol;Acc:MGI:1920325]		TRUE	2.68618e-56	6707	1851	887	0.4792	0.13225	TF:M01219	TF	Factor: SP1:SP3; motif: CCSCCCCCYCC	21866	3220
Ppip5k2	diphosphoinositol pentakisphosphate kinase 2 [Source:MGI Symbol;Acc:MGI:2142810]		TRUE	9.40975e-56	11303	1851	1285	0.694219	0.113687	TF:M02089	TF	Factor: E2F-3; motif: GGCGGGN	21866	752
Ppm1e	protein phosphatase 1E (PP2C domain containing) [Source:MGI Symbol;Acc:MGI:2444096]		TRUE	3.92893e-54	10780	1851	1238	0.668828	0.114842	TF:M10375	TF	Factor: Sp1; motif: GGNGGGGGNGGGGGMGGGGCNGGG	21866	3226
Ppp1r12b	protein phosphatase 1, regulatory subunit 12B [Source:MGI Symbol;Acc:MGI:1916417]		TRUE	1.62847e-53	13520	1851	1450	0.78336	0.107249	TF:M10276	TF	Factor: Kaiso; motif: SARNYCTCGCGAGAN	21866	3790
Ppp1r13b	protein phosphatase 1, regulatory subunit 13B [Source:MGI Symbol;Acc:MGI:1336199]		TRUE	4.0354e-52	5870	1851	795	0.429498	0.135434	TF:M03876_1	TF	Factor: Kaiso; motif: GCMGGGRGCRGS; match class: 1	21866	1819
Ppp1r16b	protein phosphatase 1, regulatory subunit 16B [Source:MGI Symbol;Acc:MGI:2151841]		TRUE	5.34503e-51	5852	1851	790	0.426796	0.134997	TF:M02933_1	TF	Factor: ZF5; motif: GYCGCGCARNGCNN; match class: 1	21866	3839
Ppp1r3c	protein phosphatase 1, regulatory subunit 3C [Source:MGI Symbol;Acc:MGI:1858229]		TRUE	2.66921e-50	7545	1851	947	0.511615	0.125514	TF:M02036	TF	Factor: WT1; motif: CGCCCCCNCN	21866	3742
Ppp1r3d	protein phosphatase 1, regulatory subunit 3D [Source:MGI Symbol;Acc:MGI:1917664]		TRUE	3.19283e-50	6114	1851	813	0.439222	0.132974	TF:M07354	TF	Factor: Egr-1; motif: GCGGGGGCGG	21866	834
Ppp1r9a	protein phosphatase 1, regulatory subunit 9A [Source:MGI Symbol;Acc:MGI:2442401]		TRUE	3.52014e-50	11168	1851	1258	0.679633	0.112643	TF:M03876	TF	Factor: Kaiso; motif: GCMGGGRGCRGS	21866	1818
Ppp2r2b	protein phosphatase 2, regulatory subunit B, beta [Source:MGI Symbol;Acc:MGI:1920180]		TRUE	5.27513e-49	9740	1851	1136	0.613722	0.116632	TF:M12470	TF	Factor: Foxn1; motif: RGAMGC	21866	1154
Ppp2r2c	protein phosphatase 2, regulatory subunit B, gamma [Source:MGI Symbol;Acc:MGI:2442660]		TRUE	2.62358e-47	6007	1851	794	0.428957	0.132179	TF:M00982	TF	Factor: KROX; motif: CCCGCCCCCRCCCC	21866	1854
Ppp2r3a	protein phosphatase 2, regulatory subunit B'', alpha [Source:MGI Symbol;Acc:MGI:2442104]		TRUE	1.46701e-46	6674	1851	855	0.461912	0.128109	TF:M03893	TF	Factor: WT1; motif: GNGGGGGCGGGG	21866	3744
Ppp6r3	protein phosphatase 6, regulatory subunit 3 [Source:MGI Symbol;Acc:MGI:1921807]		TRUE	4.26664e-45	6193	1851	805	0.4349	0.129985	TF:M01857	TF	Factor: AP-2alpha; motif: NGCCYSNNGSN	21866	98
Prag1	PEAK1 related kinase activating pseudokinase 1 [Source:MGI Symbol;Acc:MGI:1196223]		TRUE	4.68151e-45	5850	1851	772	0.417072	0.131966	TF:M08878	TF	Factor: EGR; motif: CGCCCCCGCNN	21866	860
Prdm16	PR domain containing 16 [Source:MGI Symbol;Acc:MGI:1917923]		TRUE	4.74036e-45	5024	1851	691	0.373312	0.13754	TF:M01873	TF	Factor: Egr-1; motif: GCGGGGGCGG	21866	836
Prdm5	PR domain containing 5 [Source:MGI Symbol;Acc:MGI:1918029]		TRUE	9.39994e-45	3282	1851	509	0.274986	0.155088	TF:M01104_1	TF	Factor: MOVO-B; motif: GNGGGGG; match class: 1	21866	2111
Prdm8	PR domain containing 8 [Source:MGI Symbol;Acc:MGI:1924880]		TRUE	9.97701e-45	6918	1851	872	0.471097	0.126048	TF:M02089_1	TF	Factor: E2F-3; motif: GGCGGGN; match class: 1	21866	753
Prdx1	peroxiredoxin 1 [Source:MGI Symbol;Acc:MGI:99523]		TRUE	5.03447e-44	11008	1851	1226	0.662345	0.111374	TF:M07289_1	TF	Factor: GKLF; motif: NNNRGGNGNGGSN; match class: 1	21866	1351
Prdx2	peroxiredoxin 2 [Source:MGI Symbol;Acc:MGI:109486]		TRUE	1.74549e-43	6373	1851	817	0.441383	0.128197	TF:M01199	TF	Factor: RNF96; motif: BCCCGCRGCC	21866	2914
Prdx5	peroxiredoxin 5 [Source:MGI Symbol;Acc:MGI:1859821]		TRUE	3.40832e-43	13719	1851	1436	0.775797	0.104672	TF:M02844	TF	Factor: BCL6B; motif: NNNNCCGCCCCWNNNN	21866	262
Prdx6	peroxiredoxin 6 [Source:MGI Symbol;Acc:MGI:894320]		TRUE	9.24103e-43	8560	1851	1014	0.547812	0.118458	TF:M02844_1	TF	Factor: BCL6B; motif: NNNNCCGCCCCWNNNN; match class: 1	21866	263
Prelid3a	PRELI domain containing 3A [Source:MGI Symbol;Acc:MGI:2442865]		TRUE	1.83514e-42	8685	1851	1024	0.553214	0.117904	TF:M00931	TF	Factor: Sp1; motif: GGGGCGGGGC	21866	3236
Prex1	phosphatidylinositol-3,4,5-trisphosphate-dependent Rac exchange factor 1 [Source:MGI Symbol;Acc:MGI:3040696]		TRUE	8.37778e-42	8790	1851	1031	0.556996	0.117292	TF:M00933	TF	Factor: Sp1; motif: CCCCGCCCCN	21866	3228
Prex2	phosphatidylinositol-3,4,5-trisphosphate-dependent Rac exchange factor 2 [Source:MGI Symbol;Acc:MGI:1923385]		TRUE	1.13336e-41	8967	1851	1046	0.5651	0.11665	TF:M00932	TF	Factor: Sp1; motif: NNGGGGCGGGGNN	21866	3232
Prickle1	prickle planar cell polarity protein 1 [Source:MGI Symbol;Acc:MGI:1916034]		TRUE	1.36703e-41	8074	1851	967	0.52242	0.119767	TF:M00189	TF	Factor: AP-2; motif: MKCCCSCNGGCG	21866	118
Prickle2	prickle planar cell polarity protein 2 [Source:MGI Symbol;Acc:MGI:1925144]		TRUE	2.33229e-41	9152	1851	1061	0.573204	0.115931	TF:M07395	TF	Factor: Sp1; motif: NGGGGCGGGGN	21866	3230
Prkaa2	protein kinase, AMP-activated, alpha 2 catalytic subunit [Source:MGI Symbol;Acc:MGI:1336173]		TRUE	5.36494e-41	10594	1851	1182	0.638574	0.111573	TF:M07380	TF	Factor: E2F-4; motif: NTTTCSCGCC	21866	760
Prkacb	protein kinase, cAMP dependent, catalytic, beta [Source:MGI Symbol;Acc:MGI:97594]		TRUE	2.75193e-40	8112	1851	966	0.52188	0.119083	TF:M07397	TF	Factor: ZBP89; motif: CCCCKCCCCCNN	21866	3778
Prkcb	protein kinase C, beta [Source:MGI Symbol;Acc:MGI:97596]		TRUE	3.4302e-40	13442	1851	1406	0.759589	0.104598	TF:M02874	TF	Factor: IRF6; motif: NNNACTCYCGGKNNN	21866	1766
Prkcd	protein kinase C, delta [Source:MGI Symbol;Acc:MGI:97598]		TRUE	3.62613e-40	6180	1851	788	0.425716	0.127508	TF:M07329	TF	Factor: Osx; motif: CCNCCCCCNNN	21866	2550
Prkce	protein kinase C, epsilon [Source:MGI Symbol;Acc:MGI:97599]		TRUE	5.25438e-40	6707	1851	837	0.452188	0.124795	TF:M05547	TF	Factor: ZAC; motif: KGGGCCR	21866	3772
Prkcz	protein kinase C, zeta [Source:MGI Symbol;Acc:MGI:97602]		TRUE	6.66493e-39	10367	1851	1156	0.624527	0.111508	TF:M02090	TF	Factor: E2F-4; motif: GCGGGAAANA	21866	762
Prkd1	protein kinase D1 [Source:MGI Symbol;Acc:MGI:99879]		TRUE	4.43921e-38	9051	1851	1041	0.562399	0.115015	TF:M07250	TF	Factor: E2F-1; motif: NNNSSCGCSAANN	21866	736
Prkn	parkin RBR E3 ubiquitin protein ligase [Source:MGI Symbol;Acc:MGI:1355296]		TRUE	5.51129e-38	7291	1851	884	0.47758	0.121245	TF:M08867	TF	Factor: AP2; motif: GCCYGSGGSN	21866	116
Prodh	proline dehydrogenase [Source:MGI Symbol;Acc:MGI:97770]		TRUE	6.68153e-38	8817	1851	1020	0.551053	0.115686	TF:M00196	TF	Factor: Sp1; motif: NGGGGGCGGGGYN	21866	3234
Prpf39	pre-mRNA processing factor 39 [Source:MGI Symbol;Acc:MGI:104602]		TRUE	1.12895e-37	7755	1851	925	0.49973	0.119278	TF:M07436	TF	Factor: WT1; motif: NNGGGNGGGSGN	21866	3738
Prr11	proline rich 11 [Source:MGI Symbol;Acc:MGI:2444496]		TRUE	4.39012e-37	3155	1851	474	0.256078	0.150238	TF:M02036_1	TF	Factor: WT1; motif: CGCCCCCNCN; match class: 1	21866	3743
Prr16	proline rich 16 [Source:MGI Symbol;Acc:MGI:1918623]		TRUE	2.30004e-36	4414	1851	603	0.32577	0.136611	TF:M10213	TF	Factor: Egr-1; motif: NNGCGKGGGCGGGG	21866	832
Prrc2b	proline-rich coiled-coil 2B [Source:MGI Symbol;Acc:MGI:1923304]		TRUE	2.74045e-36	8472	1851	984	0.531605	0.116147	TF:M07040_1	TF	Factor: GKLF; motif: NNRRGRRNGNSNNN; match class: 1	21866	1349
Prrc2c	proline-rich coiled-coil 2C [Source:MGI Symbol;Acc:MGI:1913754]		TRUE	4.34906e-36	12977	1851	1357	0.733117	0.10457	TF:M07040	TF	Factor: GKLF; motif: NNRRGRRNGNSNNN	21866	1348
Prrt1	proline-rich transmembrane protein 1 [Source:MGI Symbol;Acc:MGI:1932118]		TRUE	2.59531e-35	7164	1851	863	0.466234	0.120463	TF:M02874_1	TF	Factor: IRF6; motif: NNNACTCYCGGKNNN; match class: 1	21866	1767
Prrt2	proline-rich transmembrane protein 2 [Source:MGI Symbol;Acc:MGI:1916267]		TRUE	5.53271e-35	2045	1851	344	0.185845	0.168215	TF:M00982_1	TF	Factor: KROX; motif: CCCGCCCCCRCCCC; match class: 1	21866	1855
Prtg	protogenin [Source:MGI Symbol;Acc:MGI:2444710]		TRUE	9.54924e-35	15345	1851	1530	0.82658	0.0997067	TF:M07289	TF	Factor: GKLF; motif: NNNRGGNGNGGSN	21866	1350
Psap	prosaposin [Source:MGI Symbol;Acc:MGI:97783]		TRUE	1.41092e-34	6758	1851	823	0.444625	0.121782	TF:M00800	TF	Factor: AP-2; motif: GSCCSCRGGCNRNRNN	21866	114
Psd2	pleckstrin and Sec7 domain containing 2 [Source:MGI Symbol;Acc:MGI:1921252]		TRUE	3.05157e-34	5129	1851	667	0.360346	0.130045	TF:M01858	TF	Factor: AP-2beta; motif: GCNNNGGSCNGVGGGN	21866	100
Psd3	pleckstrin and Sec7 domain containing 3 [Source:MGI Symbol;Acc:MGI:1918215]		TRUE	3.16476e-34	5335	1851	687	0.371151	0.128772	TF:M05599	TF	Factor: WT1; motif: NGCGGGGGGGTSMMCYN	21866	3734
Psenen	presenilin enhancer gamma secretase subunit [Source:MGI Symbol;Acc:MGI:1913590]		TRUE	1.90026e-33	4861	1851	638	0.344679	0.131249	TF:M10376	TF	Factor: Sp5; motif: RNGGRGGNGGRGNNGGGGGAGGRG	21866	3260
Ptch1	patched 1 [Source:MGI Symbol;Acc:MGI:105373]		TRUE	4.21291e-33	8434	1851	969	0.523501	0.114892	TF:M00649	TF	Factor: MAZ; motif: GGGGAGGG	21866	2024
Ptch2	patched 2 [Source:MGI Symbol;Acc:MGI:1095405]		TRUE	3.44989e-32	7256	1851	860	0.464614	0.118523	TF:M05494	TF	Factor: Egr-2; motif: GCGTGGGCGG	21866	840
Ptchd4	patched domain containing 4 [Source:MGI Symbol;Acc:MGI:1920485]		TRUE	9.36185e-32	8130	1851	937	0.506213	0.115252	TF:M01118	TF	Factor: WT1; motif: SMCNCCNSC	21866	3740
Ptgs1	prostaglandin-endoperoxide synthase 1 [Source:MGI Symbol;Acc:MGI:97797]		TRUE	1.64538e-31	7350	1851	866	0.467855	0.117823	TF:M10278	TF	Factor: KLF3; motif: NNNNNNGGGCGGGGCNNGN	21866	1834
Ptk2	PTK2 protein tyrosine kinase 2 [Source:MGI Symbol;Acc:MGI:95481]		TRUE	5.69872e-31	7928	1851	916	0.494868	0.11554	TF:M00428	TF	Factor: E2F-1; motif: NKTSSCGC	21866	730
Ptpn13	protein tyrosine phosphatase, non-receptor type 13 [Source:MGI Symbol;Acc:MGI:103293]		TRUE	1.40986e-30	6356	1851	771	0.416532	0.121303	TF:M01175	TF	Factor: CKROX; motif: SCCCTCCCC	21866	476
Ptpn4	protein tyrosine phosphatase, non-receptor type 4 [Source:MGI Symbol;Acc:MGI:1099792]		TRUE	1.75532e-30	6618	1851	795	0.429498	0.120127	TF:M02835_1	TF	Factor: Zic1; motif: NNCCCCCGGGGGGG; match class: 1	21866	4123
Ptpn9	protein tyrosine phosphatase, non-receptor type 9 [Source:MGI Symbol;Acc:MGI:1928376]		TRUE	2.21511e-30	6439	1851	778	0.420313	0.120826	TF:M03567	TF	Factor: Sp2; motif: NYSGCCCCGCCCCCY	21866	3240
Ptprd	protein tyrosine phosphatase, receptor type, D [Source:MGI Symbol;Acc:MGI:97812]		TRUE	3.04887e-30	7008	1851	830	0.448406	0.118436	TF:M10211	TF	Factor: E2F-4; motif: NGGGGGCGGGRMNN	21866	758
Ptprj	protein tyrosine phosphatase, receptor type, J [Source:MGI Symbol;Acc:MGI:104574]		TRUE	9.12716e-30	9559	1851	1054	0.569422	0.110263	TF:M02835	TF	Factor: Zic1; motif: NNCCCCCGGGGGGG	21866	4122
Ptprm	protein tyrosine phosphatase, receptor type, M [Source:MGI Symbol;Acc:MGI:102694]		TRUE	1.55179e-29	7968	1851	914	0.493787	0.114709	TF:M02023	TF	Factor: MAZ; motif: NKGGGAGGGGRGGR	21866	2026
Ptpro	protein tyrosine phosphatase, receptor type, O [Source:MGI Symbol;Acc:MGI:1097152]		TRUE	1.69736e-29	8969	1851	1002	0.541329	0.111718	TF:M01865	TF	Factor: BTEB3; motif: BNRNGGGAGGNGT	21866	336
Ptprt	protein tyrosine phosphatase, receptor type, T [Source:MGI Symbol;Acc:MGI:1321152]		TRUE	3.46093e-29	8378	1851	949	0.512696	0.113273	TF:M00008	TF	Factor: Sp1; motif: GGGGCGGGGT	21866	3222
Ptprz1	protein tyrosine phosphatase, receptor type Z, polypeptide 1 [Source:MGI Symbol;Acc:MGI:97816]		TRUE	4.57656e-29	4549	1851	592	0.319827	0.130138	TF:M07395_1	TF	Factor: Sp1; motif: NGGGGCGGGGN; match class: 1	21866	3231
Purg	purine-rich element binding protein G [Source:MGI Symbol;Acc:MGI:1922279]		TRUE	6.46709e-29	19960	1851	1808	0.976769	0.0905812	TF:M01822_1	TF	Factor: CPBP; motif: SNCCCNN; match class: 1	21866	543
Pygm	muscle glycogen phosphorylase [Source:MGI Symbol;Acc:MGI:97830]		TRUE	9.97672e-29	7116	1851	834	0.450567	0.117201	TF:M03807	TF	Factor: SP2; motif: GNNGGGGGCGGGGSN	21866	3242
R3hdm1	R3H domain containing 1 [Source:MGI Symbol;Acc:MGI:2448514]		TRUE	1.47642e-28	6000	1851	730	0.394381	0.121667	TF:M12438	TF	Factor: Wt1; motif: NNCCTCCCCCACNN	21866	3736
Rab11fip2	RAB11 family interacting protein 2 (class I) [Source:MGI Symbol;Acc:MGI:1922248]		TRUE	2.00368e-28	7173	1851	838	0.452728	0.116827	TF:M01303	TF	Factor: SP1; motif: GGGGYGGGGNS	21866	3224
Rab26os	RAB26, member RAS oncogene family, opposite strand [Source:MGI Symbol;Acc:MGI:1922864]		TRUE	4.14552e-28	7618	1851	877	0.473798	0.115122	TF:M07277	TF	Factor: BTEB2; motif: RGGGNGKGGN	21866	332
Rab30	RAB30, member RAS oncogene family [Source:MGI Symbol;Acc:MGI:1923235]		TRUE	5.90052e-28	2564	1851	383	0.206915	0.149376	TF:M03893_1	TF	Factor: WT1; motif: GNGGGGGCGGGG; match class: 1	21866	3745
Rabac1	Rab acceptor 1 (prenylated) [Source:MGI Symbol;Acc:MGI:1201692]		TRUE	6.21671e-28	15274	1851	1503	0.811994	0.0984025	TF:M07991	TF	Factor: Hes1; motif: NNCACGYGNN	21866	1436
Rabep1	rabaptin, RAB GTPase binding effector protein 1 [Source:MGI Symbol;Acc:MGI:1860236]		TRUE	1.23906e-27	3821	1851	514	0.277688	0.13452	TF:M10412	TF	Factor: ZNF151; motif: GGSGGNGGGGGAGGGGMGG	21866	2094
Rabgap1l	RAB GTPase activating protein 1-like [Source:MGI Symbol;Acc:MGI:1352507]		TRUE	1.59082e-27	6342	1851	758	0.409508	0.119521	TF:M05541	TF	Factor: Zfp536; motif: NCGGAKG	21866	3968
Ralgapa1	Ral GTPase activating protein, alpha subunit 1 [Source:MGI Symbol;Acc:MGI:1931050]		TRUE	2.01391e-27	2736	1851	400	0.216099	0.146199	TF:M01199_1	TF	Factor: RNF96; motif: BCCCGCRGCC; match class: 1	21866	2915
Ralgapa2	Ral GTPase activating protein, alpha subunit 2 (catalytic) [Source:MGI Symbol;Acc:MGI:3036245]		TRUE	2.08894e-27	5571	1851	685	0.37007	0.122958	TF:M01598	TF	Factor: ZBED6; motif: NRRGCTCGCCNN	21866	3774
Ralgapb	Ral GTPase activating protein, beta subunit (non-catalytic) [Source:MGI Symbol;Acc:MGI:2444531]		TRUE	4.0785e-27	2206	1851	341	0.184225	0.154578	TF:M01857_1	TF	Factor: AP-2alpha; motif: NGCCYSNNGSN; match class: 1	21866	99
Ralgps2	Ral GEF with PH domain and SH3 binding motif 2 [Source:MGI Symbol;Acc:MGI:1925505]		TRUE	1.74713e-26	3046	1851	430	0.232307	0.141169	TF:M00649_1	TF	Factor: MAZ; motif: GGGGAGGG; match class: 1	21866	2025
Ralyl	RALY RNA binding protein-like [Source:MGI Symbol;Acc:MGI:1924147]		TRUE	2.18653e-26	7131	1851	826	0.446245	0.115832	TF:M00915	TF	Factor: AP-2; motif: SNNNCCNCAGGCN	21866	120
Ramp1	receptor (calcitonin) activity modifying protein 1 [Source:MGI Symbol;Acc:MGI:1858418]		TRUE	3.10908e-26	7039	1851	817	0.441383	0.116068	TF:M00470	TF	Factor: AP-2gamma; motif: GCCYNNGGS	21866	102
Rap1gap	Rap1 GTPase-activating protein [Source:MGI Symbol;Acc:MGI:109338]		TRUE	4.14054e-26	2116	1851	328	0.177202	0.155009	TF:M07354_1	TF	Factor: Egr-1; motif: GCGGGGGCGG; match class: 1	21866	835
Rarres2	retinoic acid receptor responder (tazarotene induced) 2 [Source:MGI Symbol;Acc:MGI:1918910]		TRUE	5.61589e-26	3681	1851	494	0.266883	0.134203	TF:M00189_1	TF	Factor: AP-2; motif: MKCCCSCNGGCG; match class: 1	21866	119
Rasgrf1	RAS protein-specific guanine nucleotide-releasing factor 1 [Source:MGI Symbol;Acc:MGI:99694]		TRUE	7.06171e-26	4011	1851	527	0.284711	0.131389	TF:M00933_1	TF	Factor: Sp1; motif: CCCCGCCCCN; match class: 1	21866	3229
Rassf2	Ras association (RalGDS/AF-6) domain family member 2 [Source:MGI Symbol;Acc:MGI:2442060]		TRUE	7.74146e-26	4384	1851	564	0.3047	0.12865	TF:M00932_1	TF	Factor: Sp1; motif: NNGGGGCGGGGNN; match class: 1	21866	3233
Rassf9	Ras association (RalGDS/AF-6) domain family (N-terminal) member 9 [Source:MGI Symbol;Acc:MGI:2384307]		TRUE	1.33714e-25	4141	1851	539	0.291194	0.130162	TF:M07250_1	TF	Factor: E2F-1; motif: NNNSSCGCSAANN; match class: 1	21866	737
Raver2	ribonucleoprotein, PTB-binding 2 [Source:MGI Symbol;Acc:MGI:2443623]		TRUE	1.38953e-25	8126	1851	912	0.492707	0.112232	TF:M10212	TF	Factor: E2F-7; motif: GRGGCGGGAANNN	21866	766
Rax	retina and anterior neural fold homeobox [Source:MGI Symbol;Acc:MGI:109632]		TRUE	1.51965e-25	5238	1851	646	0.349001	0.12333	TF:M00938	TF	Factor: E2F-1; motif: TTGGCGCGRAANNGNM	21866	732
Rbfox2	RNA binding protein, fox-1 homolog (C. elegans) 2 [Source:MGI Symbol;Acc:MGI:1933973]		TRUE	4.15535e-25	3398	1851	462	0.249595	0.135962	TF:M01219_1	TF	Factor: SP1:SP3; motif: CCSCCCCCYCC; match class: 1	21866	3221
Rbis	ribosomal biogenesis factor [Source:MGI Symbol;Acc:MGI:1916376]		TRUE	4.32707e-25	3890	1851	512	0.276607	0.13162	TF:M07397_1	TF	Factor: ZBP89; motif: CCCCKCCCCCNN; match class: 1	21866	3779
Rbm26	RNA binding motif protein 26 [Source:MGI Symbol;Acc:MGI:1921463]		TRUE	7.4417e-25	3465	1851	468	0.252836	0.135065	TF:M02744	TF	Factor: Egr1; motif: NCCGCCCCCGCANN	21866	824
Rbm33	RNA binding motif protein 33 [Source:MGI Symbol;Acc:MGI:1919670]		TRUE	8.85294e-25	3283	1851	449	0.242572	0.136765	TF:M00469	TF	Factor: AP-2alpha; motif: GCCNNNRGS	21866	90
Rbm4b	RNA binding motif protein 4B [Source:MGI Symbol;Acc:MGI:1913954]		TRUE	1.03072e-24	4991	1851	619	0.334414	0.124023	TF:M03814	TF	Factor: BTEB2; motif: GNAGGGGGNGGGSSNN	21866	330
Rbm5	RNA binding motif protein 5 [Source:MGI Symbol;Acc:MGI:1933204]		TRUE	3.15254e-24	2691	1851	385	0.207996	0.143069	TF:M08867_1	TF	Factor: AP2; motif: GCCYGSGGSN; match class: 1	21866	117
Rbm6	RNA binding motif protein 6 [Source:MGI Symbol;Acc:MGI:1338037]		TRUE	5.05434e-24	4988	1851	616	0.332793	0.123496	TF:M01837	TF	Factor: FKLF; motif: BGGGNGGVMD	21866	1062
Rbms2	RNA binding motif, single stranded interacting protein 2 [Source:MGI Symbol;Acc:MGI:1861776]		TRUE	1.1246e-23	4203	1851	538	0.290654	0.128004	TF:M00931_1	TF	Factor: Sp1; motif: GGGGCGGGGC; match class: 1	21866	3237
Rbms3	RNA binding motif, single stranded interacting protein [Source:MGI Symbol;Acc:MGI:2444477]		TRUE	2.56073e-23	14564	1851	1433	0.774176	0.0983933	TF:M02872	TF	Factor: IRF4; motif: NNNAYTCTCGGWNNN	21866	1748
Reck	reversion-inducing-cysteine-rich protein with kazal motifs [Source:MGI Symbol;Acc:MGI:1855698]		TRUE	2.79051e-23	11173	1851	1163	0.628309	0.10409	TF:M07991_1	TF	Factor: Hes1; motif: NNCACGYGNN; match class: 1	21866	1437
Relch	RAB11 binding and LisH domain, coiled-coil and HEAT repeat containing [Source:MGI Symbol;Acc:MGI:1922832]		TRUE	3.42352e-23	4020	1851	518	0.279849	0.128856	TF:M07436_1	TF	Factor: WT1; motif: NNGGGNGGGSGN; match class: 1	21866	3739
Reps1	RalBP1 associated Eps domain containing protein [Source:MGI Symbol;Acc:MGI:1196373]		TRUE	7.95159e-23	5394	1851	650	0.351162	0.120504	TF:M07380_1	TF	Factor: E2F-4; motif: NTTTCSCGCC; match class: 1	21866	761
Resp18	regulated endocrine-specific protein 18 [Source:MGI Symbol;Acc:MGI:1098222]		TRUE	8.37939e-23	8683	1851	949	0.512696	0.109294	TF:M04157	TF	Factor: Tfap2a; motif: TGCCCYNRGGGCA	21866	3624
Rev1	REV1, DNA directed polymerase [Source:MGI Symbol;Acc:MGI:1929074]		TRUE	1.58938e-22	8140	1851	900	0.486224	0.110565	TF:M02872_1	TF	Factor: IRF4; motif: NNNAYTCTCGGWNNN; match class: 1	21866	1749
Rev3l	REV3 like, DNA directed polymerase zeta catalytic subunit [Source:MGI Symbol;Acc:MGI:1337131]		TRUE	2.3697e-22	4022	1851	515	0.278228	0.128046	TF:M02810	TF	Factor: Sp4; motif: NNNNMCGCCCCCTNNNN	21866	3248
Rfx3	regulatory factor X, 3 (influences HLA class II expression) [Source:MGI Symbol;Acc:MGI:106582]		TRUE	2.84195e-22	1520	1851	249	0.134522	0.163816	TF:M01873_1	TF	Factor: Egr-1; motif: GCGGGGGCGG; match class: 1	21866	837
Rfx4	regulatory factor X, 4 (influences HLA class II expression) [Source:MGI Symbol;Acc:MGI:1918387]		TRUE	3.57617e-22	1863	1851	288	0.155592	0.154589	TF:M08878_1	TF	Factor: EGR; motif: CGCCCCCGCNN; match class: 1	21866	861
Rgl1	ral guanine nucleotide dissociation stimulator,-like 1 [Source:MGI Symbol;Acc:MGI:107484]		TRUE	1.76831e-21	4259	1851	535	0.289033	0.125616	TF:M00196_1	TF	Factor: Sp1; motif: NGGGGGCGGGGYN; match class: 1	21866	3235
Rgl2	ral guanine nucleotide dissociation stimulator-like 2 [Source:MGI Symbol;Acc:MGI:107483]		TRUE	3.77713e-21	12031	1851	1224	0.661264	0.101737	TF:M00144	TF	Factor: Pax-5; motif: RRMSWGANWYCTNRAGCGKRACSRYNSM	21866	2624
Rgma	repulsive guidance molecule family member A [Source:MGI Symbol;Acc:MGI:2679262]		TRUE	4.15307e-21	4366	1851	544	0.293895	0.124599	TF:M12470_1	TF	Factor: Foxn1; motif: RGAMGC; match class: 1	21866	1155
Rgs20	regulator of G-protein signaling 20 [Source:MGI Symbol;Acc:MGI:1929866]		TRUE	4.31879e-21	4603	1851	567	0.306321	0.123181	TF:M01118_1	TF	Factor: WT1; motif: SMCNCCNSC; match class: 1	21866	3741
Rgs22	regulator of G-protein signalling 22 [Source:MGI Symbol;Acc:MGI:3613651]		TRUE	5.79513e-21	6086	1851	707	0.381956	0.116168	TF:M00245	TF	Factor: Egr-3; motif: NTGCGTGGGCGK	21866	850
Rgs6	regulator of G-protein signaling 6 [Source:MGI Symbol;Acc:MGI:1354730]		TRUE	5.94911e-21	2521	1851	356	0.192328	0.141214	TF:M05547_1	TF	Factor: ZAC; motif: KGGGCCR; match class: 1	21866	3773
Rgs7	regulator of G protein signaling 7 [Source:MGI Symbol;Acc:MGI:1346089]		TRUE	9.09616e-21	1955	1851	294	0.158833	0.150384	TF:M10376_1	TF	Factor: Sp5; motif: RNGGRGGNGGRGNNGGGGGAGGRG; match class: 1	21866	3261
Rgs7bp	regulator of G-protein signalling 7 binding protein [Source:MGI Symbol;Acc:MGI:106334]		TRUE	1.51723e-20	9216	1851	985	0.532145	0.106879	TF:M07261	TF	Factor: LKLF; motif: GGGGTGGKSN	21866	1918
Rhcg	Rhesus blood group-associated C glycoprotein [Source:MGI Symbol;Acc:MGI:1888517]		TRUE	1.96159e-20	6241	1851	719	0.388439	0.115206	TF:M07348	TF	Factor: AP-2alpha; motif: NSCCNCRGGSN	21866	96
Rhobtb1	Rho-related BTB domain containing 1 [Source:MGI Symbol;Acc:MGI:1916538]		TRUE	4.70904e-20	5033	1851	604	0.32631	0.120008	TF:M00244	TF	Factor: NGFI-C; motif: WTGCGTGGGYGG	21866	2356
Rhobtb2	Rho-related BTB domain containing 2 [Source:MGI Symbol;Acc:MGI:2180557]		TRUE	4.90778e-20	3541	1851	458	0.247434	0.129342	TF:M02742	TF	Factor: E2F-2; motif: NNNANGGCGCGCNNN	21866	742
Rhoq	ras homolog family member Q [Source:MGI Symbol;Acc:MGI:1931553]		TRUE	6.74478e-20	4171	1851	520	0.280929	0.12467	TF:M02023_1	TF	Factor: MAZ; motif: NKGGGAGGGGRGGR; match class: 1	21866	2027
Rhou	ras homolog family member U [Source:MGI Symbol;Acc:MGI:1916831]		TRUE	7.93354e-20	3420	1851	445	0.240411	0.130117	TF:M00470_1	TF	Factor: AP-2gamma; motif: GCCYNNGGS; match class: 1	21866	103
Rif1	replication timing regulatory factor 1 [Source:MGI Symbol;Acc:MGI:1098622]		TRUE	1.11664e-19	1977	1851	293	0.158293	0.148204	TF:M01175_1	TF	Factor: CKROX; motif: SCCCTCCCC; match class: 1	21866	477
Rimbp2	RIMS binding protein 2 [Source:MGI Symbol;Acc:MGI:2443235]		TRUE	1.5144e-19	6014	1851	694	0.374932	0.115397	TF:M00516	TF	Factor: E2F-1; motif: TTTSGCGCGMNR	21866	772
Rims2	regulating synaptic membrane exocytosis 2 [Source:MGI Symbol;Acc:MGI:2152972]		TRUE	1.84215e-19	14730	1851	1430	0.772555	0.0970808	TF:M01981	TF	Factor: ELK-1; motif: ACCGGAWRTN	21866	910
Ripor2	RHO family interacting cell polarization regulator 2 [Source:MGI Symbol;Acc:MGI:2444879]		TRUE	9.07706e-19	4819	1851	578	0.312264	0.119942	TF:M00918	TF	Factor: E2F; motif: TTTSGCGSG	21866	776
Rmdn1	regulator of microtubule dynamics 1 [Source:MGI Symbol;Acc:MGI:1913552]		TRUE	9.82278e-19	1805	1851	271	0.146407	0.150139	TF:M02786_1	TF	Factor: Plagl1; motif: NNNGGGGSSCCCCNNN; match class: 1	21866	2713
Rmnd5a	required for meiotic nuclear division 5 homolog A [Source:MGI Symbol;Acc:MGI:1915727]		TRUE	2.83804e-18	2812	1851	377	0.203674	0.134068	TF:M05494_1	TF	Factor: Egr-2; motif: GCGTGGGCGG; match class: 1	21866	841
Rmst	rhabdomyosarcoma 2 associated transcript (non-coding RNA) [Source:MGI Symbol;Acc:MGI:1099806]		TRUE	5.80658e-18	5920	1851	678	0.366288	0.114527	TF:M02924	TF	Factor: TCFAP2B; motif: NTWGCCKSMGGCRNN	21866	3578
Rnf121	ring finger protein 121 [Source:MGI Symbol;Acc:MGI:1922462]		TRUE	5.89142e-18	2872	1851	382	0.206375	0.133008	TF:M01072	TF	Factor: HIC1; motif: NSNNNNTGCCCSSNN	21866	1458
Rnf169	ring finger protein 169 [Source:MGI Symbol;Acc:MGI:1920257]		TRUE	6.82854e-18	2012	1851	291	0.157212	0.144632	TF:M02786	TF	Factor: Plagl1; motif: NNNGGGGSSCCCCNNN	21866	2712
Rnf216	ring finger protein 216 [Source:MGI Symbol;Acc:MGI:1344349]		TRUE	7.28407e-18	14470	1851	1403	0.757969	0.0969592	TF:M00378_1	TF	Factor: Pax-4; motif: NNNNNYCACCCB; match class: 1	21866	2615
Rnf24	ring finger protein 24 [Source:MGI Symbol;Acc:MGI:1261771]		TRUE	7.91643e-18	1580	1851	243	0.13128	0.153797	TF:M12438_1	TF	Factor: Wt1; motif: NNCCTCCCCCACNN; match class: 1	21866	3737
Rngtt	RNA guanylyltransferase and 5'-phosphatase [Source:MGI Symbol;Acc:MGI:1329041]		TRUE	9.21045e-18	2016	1851	291	0.157212	0.144345	TF:M07329_1	TF	Factor: Osx; motif: CCNCCCCCNNN; match class: 1	21866	2551
Rnpc3	RNA-binding region (RNP1, RRM) containing 3 [Source:MGI Symbol;Acc:MGI:1914475]		TRUE	9.22487e-18	4719	1851	564	0.3047	0.119517	TF:M02090_1	TF	Factor: E2F-4; motif: GCGGGAAANA; match class: 1	21866	763
Robo1	roundabout guidance receptor 1 [Source:MGI Symbol;Acc:MGI:1274781]		TRUE	9.49225e-18	4007	1851	495	0.267423	0.123534	TF:M08996	TF	Factor: EGR-1; motif: NGCGKGGGCGKNN	21866	830
Romo1	reactive oxygen species modulator 1 [Source:MGI Symbol;Acc:MGI:1914317]		TRUE	1.09231e-17	4869	1851	578	0.312264	0.11871	TF:M00920	TF	Factor: E2F; motif: NKCGCGCSAAAN	21866	784
Ror1	receptor tyrosine kinase-like orphan receptor 1 [Source:MGI Symbol;Acc:MGI:1347520]		TRUE	1.49378e-17	5479	1851	635	0.343058	0.115897	TF:M00939	TF	Factor: E2F; motif: TTTSGCGSG	21866	780
Ror2	receptor tyrosine kinase-like orphan receptor 2 [Source:MGI Symbol;Acc:MGI:1347521]		TRUE	1.61863e-17	2937	1851	387	0.209076	0.131767	TF:M00428_1	TF	Factor: E2F-1; motif: NKTSSCGC; match class: 1	21866	731
Rora	RAR-related orphan receptor alpha [Source:MGI Symbol;Acc:MGI:104661]		TRUE	3.00635e-17	2032	1851	291	0.157212	0.143209	TF:M00469_1	TF	Factor: AP-2alpha; motif: GCCNNNRGS; match class: 1	21866	91
Rpe65	retinal pigment epithelium 65 [Source:MGI Symbol;Acc:MGI:98001]		TRUE	3.63873e-17	6004	1851	682	0.368449	0.113591	TF:M00431	TF	Factor: E2F-1; motif: TTTSGCGS	21866	740
Rptor	regulatory associated protein of MTOR, complex 1 [Source:MGI Symbol;Acc:MGI:1921620]		TRUE	3.79054e-17	5940	1851	676	0.365208	0.113805	TF:M09682	TF	Factor: E2F-4; motif: GNNGGCGGGAAN	21866	756
Rreb1	ras responsive element binding protein 1 [Source:MGI Symbol;Acc:MGI:2443664]		TRUE	4.18586e-17	3100	1851	402	0.21718	0.129677	TF:M01865_1	TF	Factor: BTEB3; motif: BNRNGGGAGGNGT; match class: 1	21866	337
Rsf1os1	remodeling and spacing factor 1, opposite strand 1 [Source:MGI Symbol;Acc:MGI:1922698]		TRUE	4.24007e-17	1371	1851	217	0.117234	0.158279	TF:M01598_1	TF	Factor: ZBED6; motif: NRRGCTCGCCNN; match class: 1	21866	3775
Rsf1os2	remodeling and spacing factor 1, opposite strand 2 [Source:MGI Symbol;Acc:MGI:3642179]		TRUE	7.00089e-17	1526	1851	234	0.126418	0.153342	TF:M01858_1	TF	Factor: AP-2beta; motif: GCNNNGGSCNGVGGGN; match class: 1	21866	101
Rsrp1	arginine/serine rich protein 1 [Source:MGI Symbol;Acc:MGI:106498]		TRUE	1.05551e-16	2426	1851	331	0.178822	0.136439	TF:M00915_1	TF	Factor: AP-2; motif: SNNNCCNCAGGCN; match class: 1	21866	121
Rtl4	retrotransposon Gag like 4 [Source:MGI Symbol;Acc:MGI:3588192]		TRUE	1.20973e-16	6588	1851	733	0.396002	0.111263	TF:M01241	TF	Factor: BEN; motif: CWGCGAYA	21866	280
Rtn1	reticulon 1 [Source:MGI Symbol;Acc:MGI:1933947]		TRUE	1.25956e-16	3801	1851	470	0.253917	0.123652	TF:M02836	TF	Factor: Zic2; motif: NMCCCCCGGGGGGGN	21866	4124
Rubie	RNA upstream of Bmp4 expressed in inner ear [Source:MGI Symbol;Acc:MGI:5568573]		TRUE	1.32633e-16	5591	1851	641	0.346299	0.114649	TF:M07249	TF	Factor: ctcf; motif: CCNCNAGRKGGCRSTN	21866	618
Rufy2	RUN and FYVE domain-containing 2 [Source:MGI Symbol;Acc:MGI:1917682]		TRUE	2.24095e-16	5218	1851	605	0.32685	0.115945	TF:M00919	TF	Factor: E2F; motif: NCSCGCSAAAN	21866	778
Rufy3	RUN and FYVE domain containing 3 [Source:MGI Symbol;Acc:MGI:106484]		TRUE	3.05654e-16	8517	1851	903	0.487844	0.106023	TF:M02913	TF	Factor: SP100; motif: NNCGTCGNNTAAWNN	21866	3218
Rundc3a	RUN domain containing 3A [Source:MGI Symbol;Acc:MGI:1858752]		TRUE	4.75767e-16	2430	1851	329	0.177742	0.135391	TF:M10211_1	TF	Factor: E2F-4; motif: NGGGGGCGGGRMNN; match class: 1	21866	759
Runx1t1	RUNX1 translocation partner 1 [Source:MGI Symbol;Acc:MGI:104793]		TRUE	1.4053e-15	7268	1851	789	0.426256	0.108558	TF:M05455	TF	Factor: SP6; motif: WGGGCGG	21866	3264
S100a1	S100 calcium binding protein A1 [Source:MGI Symbol;Acc:MGI:1338917]		TRUE	1.4053e-15	7268	1851	789	0.426256	0.108558	TF:M05301	TF	Factor: CPBP; motif: NGGGCGG	21866	540
S100a10	S100 calcium binding protein A10 (calpactin) [Source:MGI Symbol;Acc:MGI:1339468]		TRUE	1.4053e-15	7268	1851	789	0.426256	0.108558	TF:M05391	TF	Factor: LKLF; motif: NGGGCGG	21866	1916
S100a16	S100 calcium binding protein A16 [Source:MGI Symbol;Acc:MGI:1915110]		TRUE	1.4053e-15	7268	1851	789	0.426256	0.108558	TF:M05665	TF	Factor: Sp3; motif: AGGGCGG	21866	3244
S100a6	S100 calcium binding protein A6 (calcyclin) [Source:MGI Symbol;Acc:MGI:1339467]		TRUE	2.07541e-15	4174	1851	501	0.270665	0.120029	TF:M01972	TF	Factor: EGR-1; motif: TGCGTGGGCGK	21866	820
S100b	S100 protein, beta polypeptide, neural [Source:MGI Symbol;Acc:MGI:98217]		TRUE	2.20588e-15	4362	1851	519	0.280389	0.118982	TF:M00243	TF	Factor: Egr-1; motif: WTGCGTGGGCGK	21866	818
S100pbp	S100P binding protein [Source:MGI Symbol;Acc:MGI:1921898]		TRUE	2.96688e-15	3085	1851	393	0.212318	0.127391	TF:M10212_1	TF	Factor: E2F-7; motif: GRGGCGGGAANNN; match class: 1	21866	767
S1pr1	sphingosine-1-phosphate receptor 1 [Source:MGI Symbol;Acc:MGI:1096355]		TRUE	4.16098e-15	7117	1851	773	0.417612	0.108613	TF:M03811	TF	Factor: AP-2gamma; motif: GCCYNCRGSN	21866	110
Sall2	spalt like transcription factor 2 [Source:MGI Symbol;Acc:MGI:1354373]		TRUE	4.91064e-15	5879	1851	660	0.356564	0.112264	TF:M08874	TF	Factor: E2F1; motif: NNNNNGCGSSAAAN	21866	738
Sall3	spalt like transcription factor 3 [Source:MGI Symbol;Acc:MGI:109295]		TRUE	5.48734e-15	5536	1851	628	0.339276	0.113439	TF:M00144_1	TF	Factor: Pax-5; motif: RRMSWGANWYCTNRAGCGKRACSRYNSM; match class: 1	21866	2625
Samd12	sterile alpha motif domain containing 12 [Source:MGI Symbol;Acc:MGI:2444518]		TRUE	1.17037e-14	2481	1851	329	0.177742	0.132608	TF:M02836_1	TF	Factor: Zic2; motif: NMCCCCCGGGGGGGN; match class: 1	21866	4125
Sap30l	SAP30-like [Source:MGI Symbol;Acc:MGI:1354709]		TRUE	1.43541e-14	1493	1851	223	0.120475	0.149364	TF:M00938_1	TF	Factor: E2F-1; motif: TTGGCGCGRAANNGNM; match class: 1	21866	733
Saraf	store-operated calcium entry-associated regulatory factor [Source:MGI Symbol;Acc:MGI:1915137]		TRUE	1.47883e-14	6342	1851	700	0.378174	0.110375	TF:M08005_1	TF	Factor: Tcfl5; motif: NNCNCGNGNN; match class: 1	21866	3591
Sash1	SAM and SH3 domain containing 1 [Source:MGI Symbol;Acc:MGI:1917347]		TRUE	1.47883e-14	6342	1851	700	0.378174	0.110375	TF:M08005	TF	Factor: Tcfl5; motif: NNCNCGNGNN	21866	3590
Sat1	spermidine/spermine N1-acetyl transferase 1 [Source:MGI Symbol;Acc:MGI:98233]		TRUE	1.71704e-14	3805	1851	461	0.249055	0.121156	TF:M00444_1	TF	Factor: VDR; motif: GGGKNARNRRGGWSA; match class: 1	21866	3731
Scaf8	SR-related CTD-associated factor 8 [Source:MGI Symbol;Acc:MGI:1925212]		TRUE	3.3545e-14	2772	1851	357	0.192869	0.128788	TF:M01303_1	TF	Factor: SP1; motif: GGGGYGGGGNS; match class: 1	21866	3225
Scaper	S phase cyclin A-associated protein in the ER [Source:MGI Symbol;Acc:MGI:1925976]		TRUE	3.95316e-14	6664	1851	727	0.392761	0.109094	TF:M10203	TF	Factor: ctcf; motif: YGGCCASCAGRGGGCGCYNN	21866	616
Scfd2	Sec1 family domain containing 2 [Source:MGI Symbol;Acc:MGI:2443446]		TRUE	4.15613e-14	3314	1851	411	0.222042	0.124019	TF:M02837	TF	Factor: Zic3; motif: NMCCCCCGGGGGGGN	21866	4128
Sclt1	sodium channel and clathrin linker 1 [Source:MGI Symbol;Acc:MGI:1914411]		TRUE	4.22869e-14	2964	1851	376	0.203133	0.126856	TF:M03807_1	TF	Factor: SP2; motif: GNNGGGGGCGGGGSN; match class: 1	21866	3243
Scmh1	sex comb on midleg homolog 1 [Source:MGI Symbol;Acc:MGI:1352762]		TRUE	6.36585e-14	5175	1851	589	0.318206	0.113816	TF:M08875	TF	Factor: E2F; motif: NNTTTCGCGCN	21866	782
Scn8a	sodium channel, voltage-gated, type VIII, alpha [Source:MGI Symbol;Acc:MGI:103169]		TRUE	7.77243e-14	7327	1851	785	0.424095	0.107138	TF:M03944	TF	Factor: Zfp740; motif: NCCCCCCCAC	21866	4050
Scrg1	scrapie responsive gene 1 [Source:MGI Symbol;Acc:MGI:1328308]		TRUE	1.1261e-13	7708	1851	818	0.441923	0.106124	TF:M01177	TF	Factor: SREBP-2; motif: NNGYCACNNSMN	21866	3306
Scube1	signal peptide, CUB domain, EGF-like 1 [Source:MGI Symbol;Acc:MGI:1890616]		TRUE	1.68005e-13	7314	1851	782	0.422474	0.106918	TF:M00665	TF	Factor: Sp3; motif: ASMCTTGGGSRGGG	21866	3246
Sdccag8	serologically defined colon cancer antigen 8 [Source:MGI Symbol;Acc:MGI:1924066]		TRUE	1.97708e-13	2873	1851	364	0.19665	0.126697	TF:M01073	TF	Factor: HIC1; motif: NNNGGKTGCCCSNNNNNN	21866	1460
Sdhb	succinate dehydrogenase complex, subunit B, iron sulfur (Ip) [Source:MGI Symbol;Acc:MGI:1914930]		TRUE	2.07282e-13	4282	1851	502	0.271205	0.117235	TF:M01973	TF	Factor: PLAG1; motif: CCCCCKWNNNGGSCCC	21866	2708
Sdk2	sidekick cell adhesion molecule 2 [Source:MGI Symbol;Acc:MGI:2443847]		TRUE	2.76498e-13	3139	1851	390	0.210697	0.124243	TF:M10278_1	TF	Factor: KLF3; motif: NNNNNNGGGCGGGGCNNGN; match class: 1	21866	1835
Sec61g	SEC61, gamma subunit [Source:MGI Symbol;Acc:MGI:1202066]		TRUE	3.04022e-13	3171	1851	393	0.212318	0.123936	TF:M10277	TF	Factor: Klf15; motif: RGGGMGGRGNNGGGGGNGG	21866	1826
Sec62	SEC62 homolog (S. cerevisiae) [Source:MGI Symbol;Acc:MGI:1916526]		TRUE	4.70432e-13	6342	1851	692	0.373852	0.109114	TF:M00084	TF	Factor: MZF-1; motif: KNGNKAGGGGNAA	21866	2224
Selenbp1	selenium binding protein 1 [Source:MGI Symbol;Acc:MGI:96825]		TRUE	6.31626e-13	3155	1851	390	0.210697	0.123613	TF:M02938	TF	Factor: ZFP740; motif: NNNTWCCCCCCGGNRNN	21866	4048
Selenof	selenoprotein F [Source:MGI Symbol;Acc:MGI:1927947]		TRUE	8.74711e-13	2369	1851	310	0.167477	0.130857	TF:M00800_1	TF	Factor: AP-2; motif: GSCCSCRGGCNRNRNN; match class: 1	21866	115
Selenok	selenoprotein K [Source:MGI Symbol;Acc:MGI:1931466]		TRUE	8.89168e-13	10060	1851	1017	0.549433	0.101093	TF:M00444	TF	Factor: VDR; motif: GGGKNARNRRGGWSA	21866	3730
Selenop	selenoprotein P [Source:MGI Symbol;Acc:MGI:894288]		TRUE	1.25024e-12	1681	1851	237	0.128039	0.140988	TF:M07348_1	TF	Factor: AP-2alpha; motif: NSCCNCRGGSN; match class: 1	21866	97
Selenos	selenoprotein S [Source:MGI Symbol;Acc:MGI:95994]		TRUE	1.27839e-12	2473	1851	320	0.17288	0.129397	TF:M01253	TF	Factor: CNOT3; motif: GGCCGCGSSS	21866	508
Selenow	selenoprotein W [Source:MGI Symbol;Acc:MGI:1100878]		TRUE	1.29998e-12	1114	1851	174	0.0940032	0.156194	TF:M02742_1	TF	Factor: E2F-2; motif: NNNANGGCGCGCNNN; match class: 1	21866	743
Sema3c	sema domain, immunoglobulin domain (Ig), short basic domain, secreted, (semaphorin) 3C [Source:MGI Symbol;Acc:MGI:107557]		TRUE	1.4809e-12	1168	1851	180	0.0972447	0.15411	TF:M10213_1	TF	Factor: Egr-1; motif: NNGCGKGGGCGGGG; match class: 1	21866	833
Sema4a	sema domain, immunoglobulin domain (Ig), transmembrane domain (TM) and short cytoplasmic domain, (semaphorin) 4A [Source:MGI Symbol;Acc:MGI:107560]		TRUE	1.70831e-12	2439	1851	316	0.170719	0.129561	TF:M01587	TF	Factor: FPM315; motif: SRGGGAGGAGGN	21866	1196
Senp7	SUMO1/sentrin specific peptidase 7 [Source:MGI Symbol;Acc:MGI:1913565]		TRUE	2.8687e-12	2042	1851	274	0.148028	0.134182	TF:M02837_1	TF	Factor: Zic3; motif: NMCCCCCGGGGGGGN; match class: 1	21866	4129
Serf2	small EDRK-rich factor 2 [Source:MGI Symbol;Acc:MGI:1337041]		TRUE	3.99226e-12	8137	1851	847	0.45759	0.104092	TF:M01783	TF	Factor: SP2; motif: GGGCGGGAC	21866	3238
Serpine2	serine (or cysteine) peptidase inhibitor, clade E, member 2 [Source:MGI Symbol;Acc:MGI:101780]		TRUE	6.76955e-12	18749	1851	1693	0.914641	0.0902981	TF:M00378	TF	Factor: Pax-4; motif: NNNNNYCACCCB	21866	2614
Serpine3	serpin peptidase inhibitor, clade E (nexin, plasminogen activator inhibitor type 1), member 3 [Source:MGI Symbol;Acc:MGI:2442020]		TRUE	7.18982e-12	2494	1851	319	0.172339	0.127907	TF:M03567_1	TF	Factor: Sp2; motif: NYSGCCCCGCCCCCY; match class: 1	21866	3241
Serpinh1	serine (or cysteine) peptidase inhibitor, clade H, member 1 [Source:MGI Symbol;Acc:MGI:88283]		TRUE	9.96528e-12	5385	1851	597	0.322528	0.110864	TF:M00246	TF	Factor: Egr-2; motif: NTGCGTRGGCGK	21866	838
Setbp1	SET binding protein 1 [Source:MGI Symbol;Acc:MGI:1933199]		TRUE	1.14038e-11	10883	1851	1080	0.583468	0.0992373	TF:M00143	TF	Factor: Pax-5; motif: BCNNNRNGCANBGNTGNRTAGCSGCHNB	21866	2622
Setd2	SET domain containing 2 [Source:MGI Symbol;Acc:MGI:1918177]		TRUE	1.37311e-11	4473	1851	511	0.276067	0.114241	TF:M03944_1	TF	Factor: Zfp740; motif: NCCCCCCCAC; match class: 1	21866	4051
Sez6l	seizure related 6 homolog like [Source:MGI Symbol;Acc:MGI:1935121]		TRUE	1.48787e-11	4751	1851	537	0.290113	0.113029	TF:M04157_1	TF	Factor: Tfap2a; motif: TGCCCYNRGGGCA; match class: 1	21866	3625
Sez6l2	seizure related 6 homolog like 2 [Source:MGI Symbol;Acc:MGI:2385295]		TRUE	1.65492e-11	987	1851	156	0.0842788	0.158055	TF:M01837_1	TF	Factor: FKLF; motif: BGGGNGGVMD; match class: 1	21866	1063
Sf3b1	splicing factor 3b, subunit 1 [Source:MGI Symbol;Acc:MGI:1932339]		TRUE	1.80762e-11	5206	1851	579	0.312804	0.111218	TF:M02834	TF	Factor: Zfp740; motif: NNNCCCCCCCCMNNNN	21866	4046
Sfi1	Sfi1 homolog, spindle assembly associated (yeast) [Source:MGI Symbol;Acc:MGI:1926137]		TRUE	1.86036e-11	8514	1851	876	0.473258	0.102889	TF:M07461	TF	Factor: KLF; motif: GGGNGGGG	21866	1852
Sfmbt1	Scm-like with four mbt domains 1 [Source:MGI Symbol;Acc:MGI:1859609]		TRUE	1.88031e-11	6997	1851	742	0.400864	0.106045	TF:M00430	TF	Factor: E2F-1; motif: NTTSGCGG	21866	734
Sfrp5	secreted frizzled-related sequence protein 5 [Source:MGI Symbol;Acc:MGI:1860298]		TRUE	2.08453e-11	1156	1851	175	0.0945435	0.151384	TF:M00244_1	TF	Factor: NGFI-C; motif: WTGCGTGGGYGG; match class: 1	21866	2357
Sfta3-ps	surfactant associated 3, pseudogene [Source:MGI Symbol;Acc:MGI:2144804]		TRUE	2.23816e-11	3980	1851	463	0.250135	0.116332	TF:M02831	TF	Factor: Zfp281; motif: NNCCCCCCCCCCMYC	21866	3872
Sgcd	sarcoglycan, delta (dystrophin-associated glycoprotein) [Source:MGI Symbol;Acc:MGI:1346525]		TRUE	2.29777e-11	3126	1851	380	0.205294	0.121561	TF:M07277_1	TF	Factor: BTEB2; motif: RGGGNGKGGN; match class: 1	21866	333
Sgip1	SH3-domain GRB2-like (endophilin) interacting protein 1 [Source:MGI Symbol;Acc:MGI:1920344]		TRUE	2.52907e-11	3250	1851	392	0.211777	0.120615	TF:M07297	TF	Factor: MAZ; motif: CCCTCCCYCYN	21866	2022
Sgms1	sphingomyelin synthase 1 [Source:MGI Symbol;Acc:MGI:2444110]		TRUE	2.76151e-11	8503	1851	874	0.472177	0.102787	TF:M01855	TF	Factor: AHR; motif: CACGCN	21866	16
Sgsm1	small G protein signaling modulator 1 [Source:MGI Symbol;Acc:MGI:107320]		TRUE	4.90805e-11	1689	1851	232	0.125338	0.137359	TF:M05599_1	TF	Factor: WT1; motif: NGCGGGGGGGTSMMCYN; match class: 1	21866	3735
Sh3gl2	SH3-domain GRB2-like 2 [Source:MGI Symbol;Acc:MGI:700009]		TRUE	5.91423e-11	6175	1851	665	0.359265	0.107692	TF:M00050	TF	Factor: E2F; motif: TTTSGCGC	21866	770
Sh3kbp1	SH3-domain kinase binding protein 1 [Source:MGI Symbol;Acc:MGI:1889583]		TRUE	6.18107e-11	2524	1851	318	0.171799	0.12599	TF:M10210	TF	Factor: E2F-3; motif: GGGCGGGARN	21866	750
Sh3pxd2b	SH3 and PX domains 2B [Source:MGI Symbol;Acc:MGI:2442062]		TRUE	6.91017e-11	1180	1851	176	0.0950837	0.149153	TF:M10412_1	TF	Factor: ZNF151; motif: GGSGGNGGGGGAGGGGMGG; match class: 1	21866	2095
Sh3rf3	SH3 domain containing ring finger 3 [Source:MGI Symbol;Acc:MGI:2444637]		TRUE	7.23934e-11	21144	1851	1837	0.992437	0.0868804	TF:M01822	TF	Factor: CPBP; motif: SNCCCNN	21866	542
Shank2	SH3 and multiple ankyrin repeat domains 2 [Source:MGI Symbol;Acc:MGI:2671987]		TRUE	8.76176e-11	6551	1851	698	0.377093	0.106549	TF:M04155	TF	Factor: Tfap2a; motif: TGCCCYNRGGCA	21866	3620
Shc3	src homology 2 domain-containing transforming protein C3 [Source:MGI Symbol;Acc:MGI:106179]		TRUE	1.04456e-10	7836	1851	812	0.438682	0.103624	TF:M04156	TF	Factor: Tfap2a; motif: NGCCYSAGGCN	21866	3622
Shisa3	shisa family member 3 [Source:MGI Symbol;Acc:MGI:3041225]		TRUE	1.67613e-10	5286	1851	581	0.313884	0.109913	TF:M00706	TF	Factor: TFII-I; motif: RGAGGKAGG	21866	3642
Shisa6	shisa family member 6 [Source:MGI Symbol;Acc:MGI:2685725]		TRUE	2.70141e-10	5822	1851	629	0.339816	0.108038	TF:M08819	TF	Factor: LKLF; motif: CNCCACCCS	21866	1920
Shisa9	shisa family member 9 [Source:MGI Symbol;Acc:MGI:1919805]		TRUE	3.47453e-10	1365	1851	194	0.104808	0.142125	TF:M00084_1	TF	Factor: MZF-1; motif: KNGNKAGGGGNAA; match class: 1	21866	2225
Shprh	SNF2 histone linker PHD RING helicase [Source:MGI Symbol;Acc:MGI:1917581]		TRUE	3.69045e-10	2370	1851	299	0.161534	0.12616	TF:M05301_1	TF	Factor: CPBP; motif: NGGGCGG; match class: 1	21866	541
Shroom2	shroom family member 2 [Source:MGI Symbol;Acc:MGI:107194]		TRUE	3.69045e-10	2370	1851	299	0.161534	0.12616	TF:M05665_1	TF	Factor: Sp3; motif: AGGGCGG; match class: 1	21866	3245
Shroom3	shroom family member 3 [Source:MGI Symbol;Acc:MGI:1351655]		TRUE	3.69045e-10	2370	1851	299	0.161534	0.12616	TF:M05455_1	TF	Factor: SP6; motif: WGGGCGG; match class: 1	21866	3265
Shroom4	shroom family member 4 [Source:MGI Symbol;Acc:MGI:2685570]		TRUE	3.69045e-10	2370	1851	299	0.161534	0.12616	TF:M05391_1	TF	Factor: LKLF; motif: NGGGCGG; match class: 1	21866	1917
Sik1	salt inducible kinase 1 [Source:MGI Symbol;Acc:MGI:104754]		TRUE	3.90031e-10	7922	1851	816	0.440843	0.103004	TF:M02820	TF	Factor: Tcfap2b; motif: NYGCCYNARGGCAN	21866	3576
Sipa1l1	signal-induced proliferation-associated 1 like 1 [Source:MGI Symbol;Acc:MGI:2443679]		TRUE	4.58102e-10	1983	1851	259	0.139924	0.13061	TF:M06457	TF	Factor: ZN451; motif: CKGGGGGG	21866	4150
Sipa1l3	signal-induced proliferation-associated 1 like 3 [Source:MGI Symbol;Acc:MGI:1921456]		TRUE	4.76457e-10	13965	1851	1323	0.714749	0.0947368	TF:M00450	TF	Factor: Zic3; motif: NGGGKGGTC	21866	4126
Sirpa	signal-regulatory protein alpha [Source:MGI Symbol;Acc:MGI:108563]		TRUE	4.9592e-10	3397	1851	400	0.216099	0.117751	TF:M00008_1	TF	Factor: Sp1; motif: GGGGCGGGGT; match class: 1	21866	3223
Six3	sine oculis-related homeobox 3 [Source:MGI Symbol;Acc:MGI:102764]		TRUE	5.52027e-10	4736	1851	527	0.284711	0.111275	TF:M07597	TF	Factor: Egr-1; motif: GCGTGGGCGT	21866	828
Slc12a6	solute carrier family 12, member 6 [Source:MGI Symbol;Acc:MGI:2135960]		TRUE	5.90368e-10	10879	1851	1069	0.577526	0.0982627	TF:M01113	TF	Factor: CACD; motif: CCACRCCC	21866	346
Slc13a3	solute carrier family 13 (sodium-dependent dicarboxylate transporter), member 3 [Source:MGI Symbol;Acc:MGI:2149635]		TRUE	6.90719e-10	7036	1851	736	0.397623	0.104605	TF:M02885_1	TF	Factor: MYF6; motif: NNNRACAGNCNCNCC; match class: 1	21866	2193
Slc13a5	solute carrier family 13 (sodium-dependent citrate transporter), member 5 [Source:MGI Symbol;Acc:MGI:3037150]		TRUE	9.52625e-10	5095	1851	559	0.301999	0.109715	TF:M01100	TF	Factor: LRF; motif: GGGGKYNNB	21866	1926
Slc14a2	solute carrier family 14 (urea transporter), member 2 [Source:MGI Symbol;Acc:MGI:1351653]		TRUE	9.84976e-10	1116	1851	165	0.089141	0.147849	TF:M03814_1	TF	Factor: BTEB2; motif: GNAGGGGGNGGGSSNN; match class: 1	21866	331
Slc15a2	solute carrier family 15 (H+/peptide transporter), member 2 [Source:MGI Symbol;Acc:MGI:1890457]		TRUE	1.0275e-09	4368	1851	491	0.265262	0.112408	TF:M04506	TF	Factor: Egr1; motif: NNMCGCCCMCTCAMWN	21866	826
Slc16a2	solute carrier family 16 (monocarboxylic acid transporters), member 2 [Source:MGI Symbol;Acc:MGI:1203732]		TRUE	1.26691e-09	1808	1851	239	0.129119	0.13219	TF:M02743	TF	Factor: E2F-3; motif: NNNANGGCGCGCSNW	21866	746
Slc1a2	solute carrier family 1 (glial high affinity glutamate transporter), member 2 [Source:MGI Symbol;Acc:MGI:101931]		TRUE	1.42116e-09	7362	1851	763	0.41221	0.10364	TF:M00322	TF	Factor: c-Myc:Max; motif: GCCAYGYGSN	21866	2180
Slc1a4	solute carrier family 1 (glutamate/neutral amino acid transporter), member 4 [Source:MGI Symbol;Acc:MGI:2135601]		TRUE	1.79788e-09	2711	1851	330	0.178282	0.121726	TF:M07617	TF	Factor: Sp4; motif: SCCCCKCCCCCSN	21866	3254
Slc20a1	solute carrier family 20, member 1 [Source:MGI Symbol;Acc:MGI:108392]		TRUE	1.85865e-09	11479	1851	1116	0.602917	0.097221	TF:M07322_1	TF	Factor: HSF4; motif: CTGCMRN; match class: 1	21866	1679
Slc20a2	solute carrier family 20, member 2 [Source:MGI Symbol;Acc:MGI:97851]		TRUE	2.97849e-09	1176	1851	170	0.0918422	0.144558	TF:M00919_1	TF	Factor: E2F; motif: NCSCGCSAAAN; match class: 1	21866	779
Slc24a3	solute carrier family 24 (sodium/potassium/calcium exchanger), member 3 [Source:MGI Symbol;Acc:MGI:2137513]		TRUE	3.02647e-09	1068	1851	158	0.0853593	0.14794	TF:M00920_1	TF	Factor: E2F; motif: NKCGCGCSAAAN; match class: 1	21866	785
Slc24a4	solute carrier family 24 (sodium/potassium/calcium exchanger), member 4 [Source:MGI Symbol;Acc:MGI:2447362]		TRUE	4.57769e-09	2985	1851	355	0.191788	0.118928	TF:M00807	TF	Factor: Egr; motif: GTGGGSGCRRS	21866	862
Slc25a12	solute carrier family 25 (mitochondrial carrier, Aralar), member 12 [Source:MGI Symbol;Acc:MGI:1926080]		TRUE	4.93367e-09	1293	1851	182	0.0983252	0.140758	TF:M00939_1	TF	Factor: E2F; motif: TTTSGCGSG; match class: 1	21866	781
Slc25a4	solute carrier family 25 (mitochondrial carrier, adenine nucleotide translocator), member 4 [Source:MGI Symbol;Acc:MGI:1353495]		TRUE	1.5204e-08	1678	1851	221	0.119395	0.131704	TF:M00516_1	TF	Factor: E2F-1; motif: TTTSGCGCGMNR; match class: 1	21866	773
Slc25a47	solute carrier family 25, member 47 [Source:MGI Symbol;Acc:MGI:2144766]		TRUE	1.5823e-08	3793	1851	430	0.232307	0.113367	TF:M07261_1	TF	Factor: LKLF; motif: GGGGTGGKSN; match class: 1	21866	1919
Slc25a5	solute carrier family 25 (mitochondrial carrier, adenine nucleotide translocator), member 5 [Source:MGI Symbol;Acc:MGI:1353496]		TRUE	1.68964e-08	2678	1851	322	0.17396	0.120239	TF:M01593	TF	Factor: Zfx; motif: SNSCAGGCCKCGSCSS	21866	4112
Slc38a9	solute carrier family 38, member 9 [Source:MGI Symbol;Acc:MGI:1918839]		TRUE	1.89675e-08	7321	1851	752	0.406267	0.102718	TF:M01721	TF	Factor: PUR1; motif: GGGNCAGNN	21866	2824
Slc39a1	solute carrier family 39 (zinc transporter), member 1 [Source:MGI Symbol;Acc:MGI:1353474]		TRUE	4.81362e-08	4023	1851	449	0.242572	0.111608	TF:M00143_1	TF	Factor: Pax-5; motif: BCNNNRNGCANBGNTGNRTAGCSGCHNB; match class: 1	21866	2623
Slc39a12	solute carrier family 39 (zinc transporter), member 12 [Source:MGI Symbol;Acc:MGI:2139274]		TRUE	5.25815e-08	10750	1851	1045	0.56456	0.0972093	TF:M00257	TF	Factor: RREB-1; motif: CCCCAAACMMCCCC	21866	2934
Slc3a2	solute carrier family 3 (activators of dibasic and neutral amino acid transport), member 2 [Source:MGI Symbol;Acc:MGI:96955]		TRUE	7.39019e-08	3070	1851	357	0.192869	0.116287	TF:M02913_1	TF	Factor: SP100; motif: NNCGTCGNNTAAWNN; match class: 1	21866	3219
Slc41a1	solute carrier family 41, member 1 [Source:MGI Symbol;Acc:MGI:2444823]		TRUE	1.05032e-07	3832	1851	429	0.231767	0.111952	TF:M02834_1	TF	Factor: Zfp740; motif: NNNCCCCCCCCMNNNN; match class: 1	21866	4047
Slc4a4	solute carrier family 4 (anion exchanger), member 4 [Source:MGI Symbol;Acc:MGI:1927555]		TRUE	1.06353e-07	1312	1851	179	0.0967045	0.136433	TF:M01973_1	TF	Factor: PLAG1; motif: CCCCCKWNNNGGSCCC; match class: 1	21866	2709
Slc5a11	solute carrier family 5 (sodium/glucose cotransporter), member 11 [Source:MGI Symbol;Acc:MGI:1919316]		TRUE	1.14462e-07	4636	1851	504	0.272285	0.108714	TF:M08905	TF	Factor: TIEG1; motif: GGSGGKGNNN	21866	3656
Slc6a1	solute carrier family 6 (neurotransmitter transporter, GABA), member 1 [Source:MGI Symbol;Acc:MGI:95627]		TRUE	1.17571e-07	5234	1851	559	0.301999	0.106802	TF:M09681	TF	Factor: ctcf; motif: YGGCCASYAGGGGGCGCYNN	21866	614
Slc6a11	solute carrier family 6 (neurotransmitter transporter, GABA), member 11 [Source:MGI Symbol;Acc:MGI:95630]		TRUE	1.39882e-07	634	1851	103	0.0556456	0.162461	TF:M07083	TF	Factor: E2F-3; motif: YTCCCGCCCNCNSNN	21866	748
Slc6a9	solute carrier family 6 (neurotransmitter transporter, glycine), member 9 [Source:MGI Symbol;Acc:MGI:95760]		TRUE	1.57946e-07	7302	1851	744	0.401945	0.10189	TF:M01047_1	TF	Factor: AP-2alphaA; motif: ANMGCCTNAGGCKNT; match class: 1	21866	95
Slc7a10	solute carrier family 7 (cationic amino acid transporter, y+ system), member 10 [Source:MGI Symbol;Acc:MGI:1858261]		TRUE	1.57946e-07	7302	1851	744	0.401945	0.10189	TF:M01047	TF	Factor: AP-2alphaA; motif: ANMGCCTNAGGCKNT	21866	94
Slc7a11	solute carrier family 7 (cationic amino acid transporter, y+ system), member 11 [Source:MGI Symbol;Acc:MGI:1347355]		TRUE	1.87044e-07	2498	1851	299	0.161534	0.119696	TF:M02831_1	TF	Factor: Zfp281; motif: NNCCCCCCCCCCMYC; match class: 1	21866	3873
Slc7a2	solute carrier family 7 (cationic amino acid transporter, y+ system), member 2 [Source:MGI Symbol;Acc:MGI:99828]		TRUE	2.07652e-07	6849	1851	703	0.379795	0.102643	TF:M00450_1	TF	Factor: Zic3; motif: NGGGKGGTC; match class: 1	21866	4127
Slc9a9	solute carrier family 9 (sodium/hydrogen exchanger), member 9 [Source:MGI Symbol;Acc:MGI:2679732]		TRUE	2.43631e-07	3037	1851	351	0.189627	0.115575	TF:M02924_1	TF	Factor: TCFAP2B; motif: NTWGCCKSMGGCRNN; match class: 1	21866	3579
Slco1c1	solute carrier organic anion transporter family, member 1c1 [Source:MGI Symbol;Acc:MGI:1889679]		TRUE	2.44585e-07	9036	1851	894	0.482982	0.0989376	TF:M01981_1	TF	Factor: ELK-1; motif: ACCGGAWRTN; match class: 1	21866	911
Slf1	SMC5-SMC6 complex localization factor 1 [Source:MGI Symbol;Acc:MGI:2145448]		TRUE	2.90967e-07	9112	1851	900	0.486224	0.0987709	TF:M00446	TF	Factor: Spz1; motif: DNNGGRGGGWWNNNN	21866	3292
Slit2	slit guidance ligand 2 [Source:MGI Symbol;Acc:MGI:1315205]		TRUE	4.17199e-07	17408	1851	1574	0.850351	0.0904182	TF:M07322	TF	Factor: HSF4; motif: CTGCMRN	21866	1678
Slitrk2	SLIT and NTRK-like family, member 2 [Source:MGI Symbol;Acc:MGI:2679449]		TRUE	4.26291e-07	4030	1851	444	0.23987	0.110174	TF:M00976	TF	Factor: AhR,; motif: NRCGTGNGN	21866	10
Smad3	SMAD family member 3 [Source:MGI Symbol;Acc:MGI:1201674]		TRUE	5.29374e-07	1587	1851	205	0.110751	0.129175	TF:M01241_1	TF	Factor: BEN; motif: CWGCGAYA; match class: 1	21866	281
Smg1	SMG1 nonsense mediated mRNA decay associated PI3K related kinase [Source:MGI Symbol;Acc:MGI:1919742]		TRUE	5.29671e-07	1723	1851	219	0.118314	0.127104	TF:M05541_1	TF	Factor: Zfp536; motif: NCGGAKG; match class: 1	21866	3969
Smpdl3a	sphingomyelin phosphodiesterase, acid-like 3A [Source:MGI Symbol;Acc:MGI:1931437]		TRUE	6.25413e-07	861	1851	127	0.0686116	0.147503	TF:M00243_1	TF	Factor: Egr-1; motif: WTGCGTGGGCGK; match class: 1	21866	819
Smyd1	SET and MYND domain containing 1 [Source:MGI Symbol;Acc:MGI:104790]		TRUE	6.63851e-07	3302	1851	374	0.202053	0.113265	TF:M07461_1	TF	Factor: KLF; motif: GGGNGGGG; match class: 1	21866	1853
Smyd3	SET and MYND domain containing 3 [Source:MGI Symbol;Acc:MGI:1916976]		TRUE	8.26094e-07	1028	1851	145	0.078336	0.141051	TF:M10277_1	TF	Factor: Klf15; motif: RGGGMGGRGNNGGGGGNGG; match class: 1	21866	1827
Snap25	synaptosomal-associated protein 25 [Source:MGI Symbol;Acc:MGI:98331]		TRUE	8.81572e-07	10548	1851	1019	0.550513	0.096606	TF:M01770	TF	Factor: XBP-1; motif: WNNGMCACGTC	21866	3746
Snhg20	small nucleolar RNA host gene 20 [Source:MGI Symbol;Acc:MGI:1924222]		TRUE	1.00229e-06	1804	1851	226	0.122096	0.125277	TF:M01778	TF	Factor: PLAG1; motif: GRGGCNNHNNNRRGGG	21866	2706
Snhg3	small nucleolar RNA host gene 3 [Source:MGI Symbol;Acc:MGI:2684817]		TRUE	1.06937e-06	2365	1851	282	0.15235	0.119239	TF:M03871	TF	Factor: GLI; motif: MCVNNGACCACCCAV	21866	1382
Snhg9	small nucleolar RNA host gene 9 [Source:MGI Symbol;Acc:MGI:1920724]		TRUE	1.08802e-06	5447	1851	572	0.309022	0.105012	TF:M02881	TF	Factor: MAX; motif: NNGNCACGCGACNN	21866	2014
Snrk	SNF related kinase [Source:MGI Symbol;Acc:MGI:108104]		TRUE	1.41463e-06	4441	1851	479	0.258779	0.107859	TF:M07387	TF	Factor: LRF; motif: NGKGGGTSNCN	21866	1928
Sntg1	syntrophin, gamma 1 [Source:MGI Symbol;Acc:MGI:1918346]		TRUE	1.52829e-06	5063	1851	536	0.289573	0.105866	TF:M04617	TF	Factor: LRF; motif: NGNAGNGGGTYN	21866	1930
Snx25	sorting nexin 25 [Source:MGI Symbol;Acc:MGI:2142610]		TRUE	1.64311e-06	9317	1851	912	0.492707	0.0978856	TF:M10279	TF	Factor: GKLF; motif: NNNRNWGGGTGKGGC	21866	1346
Snx29	sorting nexin 29 [Source:MGI Symbol;Acc:MGI:1921728]		TRUE	1.65588e-06	2620	1851	306	0.165316	0.116794	TF:M02819	TF	Factor: Tcfap2a; motif: WNNSCCYSRGGSRAN	21866	3574
Sobp	sine oculis binding protein [Source:MGI Symbol;Acc:MGI:1924427]		TRUE	1.68793e-06	1983	1851	243	0.13128	0.122542	TF:M02846	TF	Factor: E2F-2; motif: NNNWYGGCGCCAANNNN	21866	744
Sod3	superoxide dismutase 3, extracellular [Source:MGI Symbol;Acc:MGI:103181]		TRUE	1.69187e-06	1502	1851	194	0.104808	0.129161	TF:M08874_1	TF	Factor: E2F1; motif: NNNNNGCGSSAAAN; match class: 1	21866	739
Son	Son DNA binding protein [Source:MGI Symbol;Acc:MGI:98353]		TRUE	1.7098e-06	1454	1851	189	0.102107	0.129986	TF:M00050_1	TF	Factor: E2F; motif: TTTSGCGC; match class: 1	21866	771
Sorbs1	sorbin and SH3 domain containing 1 [Source:MGI Symbol;Acc:MGI:700014]		TRUE	1.75341e-06	6575	1851	672	0.363047	0.102205	TF:M05407	TF	Factor: Klf17; motif: NGGGCGG	21866	1830
Sorbs2	sorbin and SH3 domain containing 2 [Source:MGI Symbol;Acc:MGI:1924574]		TRUE	2.3876e-06	1586	1851	202	0.10913	0.127364	TF:M00431_1	TF	Factor: E2F-1; motif: TTTSGCGS; match class: 1	21866	741
Sorbs2os	sorbin and SH3 domain containing 2, opposite strand [Source:MGI Symbol;Acc:MGI:2443013]		TRUE	2.5466e-06	1636	1851	207	0.111831	0.126528	TF:M09682_1	TF	Factor: E2F-4; motif: GNNGGCGGGAAN; match class: 1	21866	757
Sorcs2	sortilin-related VPS10 domain containing receptor 2 [Source:MGI Symbol;Acc:MGI:1932289]		TRUE	2.89175e-06	465	1851	79	0.0426796	0.169892	TF:M01072_1	TF	Factor: HIC1; motif: NSNNNNTGCCCSSNN; match class: 1	21866	1459
Sorcs3	sortilin-related VPS10 domain containing receptor 3 [Source:MGI Symbol;Acc:MGI:1913923]		TRUE	3.13038e-06	4056	1851	441	0.23825	0.108728	TF:M07042	TF	Factor: HES-1; motif: NNCKYGTGNNN	21866	1440
Sorl1	sortilin-related receptor, LDLR class A repeats-containing [Source:MGI Symbol;Acc:MGI:1202296]		TRUE	3.22286e-06	5660	1851	588	0.317666	0.103887	TF:M04156_1	TF	Factor: Tfap2a; motif: NGCCYSAGGCN; match class: 1	21866	3623
Sos2	SOS Ras/Rho guanine nucleotide exchange factor 2 [Source:MGI Symbol;Acc:MGI:98355]		TRUE	3.68744e-06	3602	1851	398	0.215019	0.110494	TF:M02011	TF	Factor: HES-1; motif: GSCACGMGMC	21866	1444
Sox13	SRY (sex determining region Y)-box 13 [Source:MGI Symbol;Acc:MGI:98361]		TRUE	4.29424e-06	3862	1851	422	0.227985	0.10927	TF:M00491	TF	Factor: MAZR; motif: NSGGGGGGGGMCN	21866	2020
Sox2ot	SOX2 overlapping transcript (non-protein coding) [Source:MGI Symbol;Acc:MGI:2444112]		TRUE	4.91146e-06	5233	1851	548	0.296056	0.10472	TF:M02820_1	TF	Factor: Tcfap2b; motif: NYGCCYNARGGCAN; match class: 1	21866	3577
Sox5	SRY (sex determining region Y)-box 5 [Source:MGI Symbol;Acc:MGI:98367]		TRUE	5.67029e-06	2150	1851	257	0.138844	0.119535	TF:M01177_1	TF	Factor: SREBP-2; motif: NNGYCACNNSMN; match class: 1	21866	3307
Sox5os4	SRY (sex determining region Y)-box 5, opposite strand 4 [Source:MGI Symbol;Acc:MGI:3783128]		TRUE	5.77678e-06	2333	1851	275	0.148568	0.117874	TF:M03811_1	TF	Factor: AP-2gamma; motif: GCCYNCRGSN; match class: 1	21866	111
Sox6	SRY (sex determining region Y)-box 6 [Source:MGI Symbol;Acc:MGI:98368]		TRUE	5.79478e-06	4724	1851	501	0.270665	0.106054	TF:M10363	TF	Factor: DRRS; motif: GNNGGGWGGG	21866	710
Sox8	SRY (sex determining region Y)-box 8 [Source:MGI Symbol;Acc:MGI:98370]		TRUE	6.08335e-06	1526	1851	194	0.104808	0.12713	TF:M07290_1	TF	Factor: GLI; motif: NGACCMCCCAN; match class: 1	21866	1361
Spaca6	sperm acrosome associated 6 [Source:MGI Symbol;Acc:MGI:1922452]		TRUE	7.37503e-06	6954	1851	701	0.378714	0.100805	TF:M07290	TF	Factor: GLI; motif: NGACCMCCCAN	21866	1360
Spag16	sperm associated antigen 16 [Source:MGI Symbol;Acc:MGI:1913972]		TRUE	1.02686e-05	1644	1851	205	0.110751	0.124696	TF:M10203_1	TF	Factor: ctcf; motif: YGGCCASCAGRGGGCGCYNN; match class: 1	21866	617
Spag17	sperm associated antigen 17 [Source:MGI Symbol;Acc:MGI:1921612]		TRUE	1.35908e-05	5866	1851	602	0.32523	0.102625	TF:M00237	TF	Factor: AhR:Arnt; motif: GRGKATYGCGTGMCWNSCC	21866	8
Spag9	sperm associated antigen 9 [Source:MGI Symbol;Acc:MGI:1918084]		TRUE	1.4339e-05	3302	1851	366	0.197731	0.110842	TF:M01783_1	TF	Factor: SP2; motif: GGGCGGGAC; match class: 1	21866	3239
Sparc	secreted acidic cysteine rich glycoprotein [Source:MGI Symbol;Acc:MGI:98373]		TRUE	1.54802e-05	1821	1851	222	0.119935	0.121911	TF:M00430_1	TF	Factor: E2F-1; motif: NTTSGCGG; match class: 1	21866	735
Spata17	spermatogenesis associated 17 [Source:MGI Symbol;Acc:MGI:1921967]		TRUE	1.94372e-05	773	1851	112	0.0605078	0.14489	TF:M02810_1	TF	Factor: Sp4; motif: NNNNMCGCCCCCTNNNN; match class: 1	21866	3249
Spata7	spermatogenesis associated 7 [Source:MGI Symbol;Acc:MGI:2144877]		TRUE	2.65979e-05	14312	1851	1319	0.712588	0.0921604	TF:M02885	TF	Factor: MYF6; motif: NNNRACAGNCNCNCC	21866	2192
Spcs1	signal peptidase complex subunit 1 homolog (S. cerevisiae) [Source:MGI Symbol;Acc:MGI:1916269]		TRUE	3.03403e-05	2590	1851	296	0.159914	0.114286	TF:M00721	TF	Factor: CACCC-binding; motif: CANCCNNWGGGTGDGG	21866	344
Spcs2	signal peptidase complex subunit 2 homolog (S. cerevisiae) [Source:MGI Symbol;Acc:MGI:1913874]		TRUE	3.68386e-05	855	1851	120	0.0648298	0.140351	TF:M04617_1	TF	Factor: LRF; motif: NGNAGNGGGTYN; match class: 1	21866	1931
Specc1l	sperm antigen with calponin homology and coiled-coil domains 1-like [Source:MGI Symbol;Acc:MGI:1921642]		TRUE	4.06857e-05	2422	1851	279	0.150729	0.115194	TF:M00322_1	TF	Factor: c-Myc:Max; motif: GCCAYGYGSN; match class: 1	21866	2181
Spef2	sperm flagellar 2 [Source:MGI Symbol;Acc:MGI:2443727]		TRUE	4.73221e-05	4206	1851	447	0.241491	0.106277	TF:M02773	TF	Factor: Klf7; motif: NNNRCCMCGCCCNNNN	21866	1840
Spink2	serine peptidase inhibitor, Kazal type 2 [Source:MGI Symbol;Acc:MGI:1917232]		TRUE	4.85412e-05	10878	1851	1033	0.558077	0.0949623	TF:M00448	TF	Factor: Zic1; motif: KGGGTGGTC	21866	4120
Spock2	sparc/osteonectin, cwcv and kazal-like domains proteoglycan 2 [Source:MGI Symbol;Acc:MGI:1891351]		TRUE	4.92902e-05	1489	1851	186	0.100486	0.124916	TF:M00706_1	TF	Factor: TFII-I; motif: RGAGGKAGG; match class: 1	21866	3643
Spon1	spondin 1, (f-spondin) extracellular matrix protein [Source:MGI Symbol;Acc:MGI:2385287]		TRUE	5.48036e-05	861	1851	120	0.0648298	0.139373	TF:M01972_1	TF	Factor: EGR-1; motif: TGCGTGGGCGK; match class: 1	21866	821
Spred1	sprouty protein with EVH-1 domain 1, related sequence [Source:MGI Symbol;Acc:MGI:2150016]		TRUE	5.6638e-05	671	1851	99	0.0534846	0.147541	TF:M02744_1	TF	Factor: Egr1; motif: NCCGCCCCCGCANN; match class: 1	21866	825
Spsb4	splA/ryanodine receptor domain and SOCS box containing 4 [Source:MGI Symbol;Acc:MGI:2183445]		TRUE	6.54351e-05	1117	1851	147	0.0794165	0.131603	TF:M10355	TF	Factor: rfx2; motif: SGSNGTTGCCATGGNRACSRGN	21866	2888
Sqle	squalene epoxidase [Source:MGI Symbol;Acc:MGI:109296]		TRUE	6.56619e-05	1843	1851	221	0.119395	0.119913	TF:M01721_1	TF	Factor: PUR1; motif: GGGNCAGNN; match class: 1	21866	2825
Srcap	Snf2-related CREBBP activator protein [Source:MGI Symbol;Acc:MGI:2444036]		TRUE	7.88744e-05	483	1851	77	0.0415991	0.15942	TF:M02938_1	TF	Factor: ZFP740; motif: NNNTWCCCCCCGGNRNN; match class: 1	21866	4049
Srcin1	SRC kinase signaling inhibitor 1 [Source:MGI Symbol;Acc:MGI:1933179]		TRUE	9.87657e-05	460	1851	74	0.0399784	0.16087	TF:M07617_1	TF	Factor: Sp4; motif: SCCCCKCCCCCSN; match class: 1	21866	3255
Srebf2	sterol regulatory element binding factor 2 [Source:MGI Symbol;Acc:MGI:107585]		TRUE	0.000146755	830	1851	115	0.0621286	0.138554	TF:M07297_1	TF	Factor: MAZ; motif: CCCTCCCYCYN; match class: 1	21866	2023
Srek1	splicing regulatory glutamine/lysine-rich protein 1 [Source:MGI Symbol;Acc:MGI:2145245]		TRUE	0.000179527	3186	1851	348	0.188006	0.109228	TF:M04155_1	TF	Factor: Tfap2a; motif: TGCCCYNRGGCA; match class: 1	21866	3621
Srgap1	SLIT-ROBO Rho GTPase activating protein 1 [Source:MGI Symbol;Acc:MGI:2152936]		TRUE	0.000183099	1232	1851	157	0.084819	0.127435	TF:M02847	TF	Factor: E2F-3; motif: NNNWYGGCGCCAMNNNN	21866	754
Srgap3	SLIT-ROBO Rho GTPase activating protein 3 [Source:MGI Symbol;Acc:MGI:2152938]		TRUE	0.000188218	12928	1851	1199	0.647758	0.0927444	TF:M00327	TF	Factor: Pax-3; motif: NNNNNNCGTCACGSTYNNNNN	21866	2612
Srsf1	serine and arginine-rich splicing factor 1 [Source:MGI Symbol;Acc:MGI:98283]		TRUE	0.000195519	9003	1851	868	0.468936	0.0964123	TF:M09692	TF	Factor: GKLF; motif: WGGGYGKGGCCN	21866	1344
Srsf2	serine and arginine-rich splicing factor 2 [Source:MGI Symbol;Acc:MGI:98284]		TRUE	0.000230817	10427	1851	989	0.534306	0.0948499	TF:M01733	TF	Factor: MZF-1; motif: TGGGGAR	21866	2226
Ssbp2	single-stranded DNA binding protein 2 [Source:MGI Symbol;Acc:MGI:1914220]		TRUE	0.000234524	21186	1851	1827	0.987034	0.0862362	TF:M01160_1	TF	Factor: Kid3; motif: CCACN; match class: 1	21866	1821
Ssbp3	single-stranded DNA binding protein 3 [Source:MGI Symbol;Acc:MGI:1919725]		TRUE	0.000274694	924	1851	124	0.0669908	0.134199	TF:M08996_1	TF	Factor: EGR-1; motif: NGCGKGGGCGKNN; match class: 1	21866	831
St3gal2	ST3 beta-galactoside alpha-2,3-sialyltransferase 2 [Source:MGI Symbol;Acc:MGI:99427]		TRUE	0.000276394	8393	1851	814	0.439762	0.0969856	TF:M03846	TF	Factor: SMAD5; motif: GSGGCAGM	21866	3076
St3gal4	ST3 beta-galactoside alpha-2,3-sialyltransferase 4 [Source:MGI Symbol;Acc:MGI:1316743]		TRUE	0.000432818	9540	1851	911	0.492166	0.0954927	TF:M01835_1	TF	Factor: GKLF; motif: CCTCCYN; match class: 1	21866	1353
St6gal2	beta galactoside alpha 2,6 sialyltransferase 2 [Source:MGI Symbol;Acc:MGI:2445190]		TRUE	0.000482767	981	1851	129	0.0696921	0.131498	TF:M00918_1	TF	Factor: E2F; motif: TTTSGCGSG; match class: 1	21866	777
St6galnac3	ST6 (alpha-N-acetyl-neuraminyl-2,3-beta-galactosyl-1,3)-N-acetylgalactosaminide alpha-2,6-sialyltransferase 3 [Source:MGI Symbol;Acc:MGI:1341828]		TRUE	0.000496337	4462	1851	463	0.250135	0.103765	TF:M01113_1	TF	Factor: CACD; motif: CCACRCCC; match class: 1	21866	347
St6galnac5	ST6 (alpha-N-acetyl-neuraminyl-2,3-beta-galactosyl-1,3)-N-acetylgalactosaminide alpha-2,6-sialyltransferase 5 [Source:MGI Symbol;Acc:MGI:1349471]		TRUE	0.000689725	1416	1851	173	0.093463	0.122175	TF:M10416	TF	Factor: Zfp57; motif: CTGCGGCARN	21866	3984
Stag1	stromal antigen 1 [Source:MGI Symbol;Acc:MGI:1098658]		TRUE	0.000695273	7870	1851	765	0.41329	0.0972046	TF:M01588	TF	Factor: GKLF; motif: GCCMCRCCCNNN	21866	1342
Stambpl1	STAM binding protein like 1 [Source:MGI Symbol;Acc:MGI:1923880]		TRUE	0.000751206	16075	1851	1449	0.78282	0.09014	TF:M01835	TF	Factor: GKLF; motif: CCTCCYN	21866	1352
Stard13	StAR-related lipid transfer (START) domain containing 13 [Source:MGI Symbol;Acc:MGI:2385331]		TRUE	0.000780916	5030	1851	513	0.277147	0.101988	TF:M01299	TF	Factor: MECP2; motif: CCGGNNTTWA	21866	2030
Stat3	signal transducer and activator of transcription 3 [Source:MGI Symbol;Acc:MGI:103038]		TRUE	0.000790342	2005	1851	231	0.124797	0.115212	TF:M01816	TF	Factor: ZBP89; motif: YCCYCCCCCM	21866	3776
Stau2	staufen double-stranded RNA binding protein 2 [Source:MGI Symbol;Acc:MGI:1352508]		TRUE	0.00086881	1175	1851	148	0.0799568	0.125957	TF:M10388_1	TF	Factor: TAFII250; motif: NAARAWGGCGGMGG; match class: 1	21866	3437
Stim1	stromal interaction molecule 1 [Source:MGI Symbol;Acc:MGI:107476]		TRUE	0.000937044	1805	1851	211	0.113992	0.116898	TF:M00491_1	TF	Factor: MAZR; motif: NSGGGGGGGGMCN; match class: 1	21866	2021
Stimate	STIM activating enhancer [Source:MGI Symbol;Acc:MGI:1921500]		TRUE	0.000943829	358	1851	59	0.0318747	0.164804	TF:M01587_1	TF	Factor: FPM315; motif: SRGGGAGGAGGN; match class: 1	21866	1197
Stk32a	serine/threonine kinase 32A [Source:MGI Symbol;Acc:MGI:2442403]		TRUE	0.000983688	13332	1851	1226	0.662345	0.0919592	TF:M10233	TF	Factor: Pet-1; motif: GCNGGAAGYG	21866	2670
Stk39	serine/threonine kinase 39 [Source:MGI Symbol;Acc:MGI:1858416]		TRUE	0.0012496	2359	1851	264	0.142626	0.111912	TF:M01273	TF	Factor: SP4; motif: SCCCCGCCCCS	21866	3256
Ston2	stonin 2 [Source:MGI Symbol;Acc:MGI:1918272]		TRUE	0.00135359	1978	1851	227	0.122636	0.114762	TF:M08819_1	TF	Factor: LKLF; motif: CNCCACCCS; match class: 1	21866	1921
Stox2	storkhead box 2 [Source:MGI Symbol;Acc:MGI:1918319]		TRUE	0.00141803	1663	1851	196	0.105889	0.117859	TF:M00245_1	TF	Factor: Egr-3; motif: NTGCGTGGGCGK; match class: 1	21866	851
Strbp	spermatid perinuclear RNA binding protein [Source:MGI Symbol;Acc:MGI:104626]		TRUE	0.00150428	3620	1851	382	0.206375	0.105525	TF:M00448_1	TF	Factor: Zic1; motif: KGGGTGGTC; match class: 1	21866	4121
Stx16	syntaxin 16 [Source:MGI Symbol;Acc:MGI:1923396]		TRUE	0.00152831	1206	1851	150	0.0810373	0.124378	TF:M08875_1	TF	Factor: E2F; motif: NNTTTCGCGCN; match class: 1	21866	783
Stx1b	syntaxin 1B [Source:MGI Symbol;Acc:MGI:1930705]		TRUE	0.00166213	1149	1851	144	0.0777958	0.125326	TF:M01100_1	TF	Factor: LRF; motif: GGGGKYNNB; match class: 1	21866	1927
Stxbp4	syntaxin binding protein 4 [Source:MGI Symbol;Acc:MGI:1342296]		TRUE	0.00179173	6137	1851	609	0.329011	0.0992342	TF:M10388	TF	Factor: TAFII250; motif: NAARAWGGCGGMGG	21866	3436
Stxbp5l	syntaxin binding protein 5-like [Source:MGI Symbol;Acc:MGI:2443815]		TRUE	0.00180821	2759	1851	301	0.162615	0.109097	TF:M01243	TF	Factor: MTF-1; motif: TGCGCAC	21866	2136
Supt3	SPT3, SAGA and STAGA complex component [Source:MGI Symbol;Acc:MGI:1923723]		TRUE	0.00193337	5322	1851	536	0.289573	0.100714	TF:M02925	TF	Factor: TCFAP2C; motif: NNGCCCNAGGGCWN	21866	3582
Susd4	sushi domain containing 4 [Source:MGI Symbol;Acc:MGI:2138351]		TRUE	0.00205423	5727	1851	572	0.309022	0.0998778	TF:M07475	TF	Factor: Tbx5; motif: SNAGGTGTGRNGGSS	21866	3514
Svil	supervillin [Source:MGI Symbol;Acc:MGI:2147319]		TRUE	0.00214523	724	1851	99	0.0534846	0.13674	TF:M08905_1	TF	Factor: TIEG1; motif: GGSGGKGNNN; match class: 1	21866	3657
Swap70	SWA-70 protein [Source:MGI Symbol;Acc:MGI:1298390]		TRUE	0.00216223	884	1851	116	0.0626688	0.131222	TF:M07597_1	TF	Factor: Egr-1; motif: GCGTGGGCGT; match class: 1	21866	829
Sycp2	synaptonemal complex protein 2 [Source:MGI Symbol;Acc:MGI:1933281]		TRUE	0.00269345	7359	1851	715	0.386278	0.0971599	TF:M09705	TF	Factor: REST; motif: YCAGCACCATGGACAGCNCCC	21866	2854
Sycp3	synaptonemal complex protein 3 [Source:MGI Symbol;Acc:MGI:109542]		TRUE	0.00274424	509	1851	75	0.0405186	0.147348	TF:M05437	TF	Factor: Klf7; motif: NGGGCGGGGG	21866	1844
Syn2	synapsin II [Source:MGI Symbol;Acc:MGI:103020]		TRUE	0.0027857	2540	1851	279	0.150729	0.109843	TF:M01714	TF	Factor: KLF15; motif: GAGNNGGGGNGTDG	21866	1828
Syn3	synapsin III [Source:MGI Symbol;Acc:MGI:1351334]		TRUE	0.003125	977	1851	125	0.0675311	0.127943	TF:M01597	TF	Factor: Zfp281; motif: TGGGGGAGGGG	21866	3870
Syne1	spectrin repeat containing, nuclear envelope 1 [Source:MGI Symbol;Acc:MGI:1927152]		TRUE	0.00355741	3165	1851	337	0.182064	0.106477	TF:M00261	TF	Factor: Olf-1; motif: NNCDABTCCCYAGRGARBNKGN	21866	2528
Syngap1	synaptic Ras GTPase activating protein 1 homolog (rat) [Source:MGI Symbol;Acc:MGI:3039785]		TRUE	0.00399336	3051	1851	326	0.176121	0.10685	TF:M10280	TF	Factor: BTEB2; motif: NGGGSWGGGNGGGGC	21866	328
Synj1	synaptojanin 1 [Source:MGI Symbol;Acc:MGI:1354961]		TRUE	0.00427385	1051	1851	132	0.0713128	0.125595	TF:M09706	TF	Factor: rfx1; motif: SNSSCNGTTGCCAKGGNRACSS	21866	2880
Gm20498	predicted gene 20498 [Source:MGI Symbol;Acc:MGI:5141963]		TRUE	0.00473121	5550	1851	553	0.298757	0.0996396	TF:M01860	TF	Factor: AP-4; motif: NCAGCTGYNGNCN	21866	130
Synj2bp	synaptojanin 2 binding protein [Source:MGI Symbol;Acc:MGI:1344347]		TRUE	0.00515385	2750	1851	297	0.160454	0.108	TF:M01855_1	TF	Factor: AHR; motif: CACGCN; match class: 1	21866	17
Synrg	synergin, gamma [Source:MGI Symbol;Acc:MGI:1354742]		TRUE	0.00544094	386	1851	60	0.0324149	0.15544	TF:M00807_1	TF	Factor: Egr; motif: GTGGGSGCRRS; match class: 1	21866	863
Syp	synaptophysin [Source:MGI Symbol;Acc:MGI:98467]		TRUE	0.00551382	1343	1851	161	0.08698	0.119881	TF:M00325	TF	Factor: NRSE; motif: TTYAGCWCCDCGGASAGYRCC	21866	2458
Syt10	synaptotagmin X [Source:MGI Symbol;Acc:MGI:1859546]		TRUE	0.00627408	3045	1851	324	0.175041	0.106404	TF:M02737	TF	Factor: Ascl2; motif: NNYNNCAGCTGCNNNNN	21866	182
T2	brachyury 2 [Source:MGI Symbol;Acc:MGI:104658]		TRUE	0.00704624	604	1851	84	0.0453809	0.139073	TF:M04627_1	TF	Factor: Rfx1; motif: GTTGCYNNGGARMS; match class: 1	21866	2883
T	brachyury, T-box transcription factor T [Source:MGI Symbol;Acc:MGI:98472]		TRUE	0.00726138	1993	1851	224	0.121016	0.112393	TF:M03574	TF	Factor: GCMa; motif: CCCGCAT	21866	1314
Taf13	TATA-box binding protein associated factor 13 [Source:MGI Symbol;Acc:MGI:1913500]		TRUE	0.0075704	523	1851	75	0.0405186	0.143403	TF:M01253_1	TF	Factor: CNOT3; motif: GGCCGCGSSS; match class: 1	21866	509
Taf15	TATA-box binding protein associated factor 15 [Source:MGI Symbol;Acc:MGI:1917689]		TRUE	0.00802061	12158	1851	1120	0.605078	0.0921204	TF:M07041	TF	Factor: HDAC1; motif: KGCARGGTC	21866	1424
Tafa1	TAFA chemokine like family member 1 [Source:MGI Symbol;Acc:MGI:2443695]		TRUE	0.008046	746	1851	99	0.0534846	0.132708	TF:M02864	TF	Factor: GM397; motif: NNMNGCACACACKCNN	21866	1390
Tafa5	TAFA chemokine like family member 5 [Source:MGI Symbol;Acc:MGI:2146182]		TRUE	0.00853964	9885	1851	928	0.501351	0.0938796	TF:M10254	TF	Factor: GLI; motif: NSTGGGTGGTCY	21866	1356
Tagln3	transgelin 3 [Source:MGI Symbol;Acc:MGI:1926784]		TRUE	0.00957912	14383	1851	1303	0.703944	0.0905931	TF:M02941_1	TF	Factor: ZIC3; motif: NNNCACAGCAKGNNN; match class: 1	21866	4131
Tanc2	tetratricopeptide repeat, ankyrin repeat and coiled-coil containing 2 [Source:MGI Symbol;Acc:MGI:2444121]		TRUE	0.00987671	1867	1851	211	0.113992	0.113016	TF:M10370	TF	Factor: slug; motif: RRCAGGTGCNN	21866	3040
Tasor	transcription activation suppressor [Source:MGI Symbol;Acc:MGI:1921694]		TRUE	0.0133381	3255	1851	341	0.184225	0.104762	TF:M01704	TF	Factor: gli3; motif: GACCACCCANG	21866	1372
Tasp1	taspase, threonine aspartase 1 [Source:MGI Symbol;Acc:MGI:1923062]		TRUE	0.0152147	10445	1851	973	0.525662	0.0931546	TF:M01993	TF	Factor: TEL1; motif: CNCGGAANNN	21866	3616
Tbc1d32	TBC1 domain family, member 32 [Source:MGI Symbol;Acc:MGI:2442827]		TRUE	0.0167413	3524	1851	365	0.197191	0.103575	TF:M01703	TF	Factor: Gli2; motif: GACCACCCANG	21866	1364
Tbc1d5	TBC1 domain family, member 5 [Source:MGI Symbol;Acc:MGI:1919488]		TRUE	0.0192697	1202	1851	144	0.0777958	0.1198	TF:M07305	TF	Factor: RFX; motif: SNGTTGCYANGGA	21866	2910
Tbce	tubulin-specific chaperone E [Source:MGI Symbol;Acc:MGI:1917680]		TRUE	0.0196962	4166	1851	423	0.228525	0.101536	TF:M04627	TF	Factor: Rfx1; motif: GTTGCYNNGGARMS	21866	2882
Tcf20	transcription factor 20 [Source:MGI Symbol;Acc:MGI:108399]		TRUE	0.0206289	2223	1851	243	0.13128	0.109312	TF:M03846_1	TF	Factor: SMAD5; motif: GSGGCAGM; match class: 1	21866	3077
Tcf4	transcription factor 4 [Source:MGI Symbol;Acc:MGI:98506]		TRUE	0.0210428	869	1851	110	0.0594273	0.126582	TF:M07361	TF	Factor: MZF-1; motif: GKGGGGARNR	21866	2228
Tcf7l1	transcription factor 7 like 1 (T cell specific, HMG box) [Source:MGI Symbol;Acc:MGI:1202876]		TRUE	0.0211329	6103	1851	596	0.321988	0.0976569	TF:M10233_1	TF	Factor: Pet-1; motif: GCNGGAAGYG; match class: 1	21866	2671
Tdrd3	tudor domain containing 3 [Source:MGI Symbol;Acc:MGI:2444023]		TRUE	0.0224172	2918	1851	308	0.166397	0.105552	TF:M00446_1	TF	Factor: Spz1; motif: DNNGGRGGGWWNNNN; match class: 1	21866	3293
Tead1	TEA domain family member 1 [Source:MGI Symbol;Acc:MGI:101876]		TRUE	0.022574	2886	1851	305	0.164776	0.105683	TF:M00235	TF	Factor: AhR:Arnt; motif: KNNKNNTYGCGTGCMS	21866	6
Tecr	trans-2,3-enoyl-CoA reductase [Source:MGI Symbol;Acc:MGI:1915408]		TRUE	0.0240161	1799	1851	202	0.10913	0.112285	TF:M07062	TF	Factor: RREB-1; motif: GRSDSGGGKTGGGKGG	21866	2936
Tef	thyrotroph embryonic factor [Source:MGI Symbol;Acc:MGI:98663]		TRUE	0.024395	4963	1851	494	0.266883	0.0995366	TF:M10175	TF	Factor: AP-2alpha; motif: NNNSCCTGRGGC	21866	3626
Tenm3	teneurin transmembrane protein 3 [Source:MGI Symbol;Acc:MGI:1345183]		TRUE	0.0254934	3106	1851	325	0.175581	0.104636	TF:M10254_1	TF	Factor: GLI; motif: NSTGGGTGGTCY; match class: 1	21866	1357
Tenm4	teneurin transmembrane protein 4 [Source:MGI Symbol;Acc:MGI:2447063]		TRUE	0.0259518	19184	1851	1679	0.907077	0.0875209	TF:M02941	TF	Factor: ZIC3; motif: NNNCACAGCAKGNNN	21866	4130
Tet1	tet methylcytosine dioxygenase 1 [Source:MGI Symbol;Acc:MGI:1098693]		TRUE	0.0267956	10783	1851	999	0.539708	0.0926458	TF:M01660	TF	Factor: GABP-alpha; motif: CTTCCK	21866	1232
Tet2	tet methylcytosine dioxygenase 2 [Source:MGI Symbol;Acc:MGI:2443298]		TRUE	0.0273344	4412	1851	444	0.23987	0.100635	TF:M00257_1	TF	Factor: RREB-1; motif: CCCCAAACMMCCCC; match class: 1	21866	2935
Tex9	testis expressed gene 9 [Source:MGI Symbol;Acc:MGI:1201610]		TRUE	0.029422	3133	1851	327	0.176661	0.104373	TF:M00797	TF	Factor: HIF1; motif: GNNKACGTGCGGNN	21866	1478
Tgfbr3	transforming growth factor, beta receptor III [Source:MGI Symbol;Acc:MGI:104637]		TRUE	0.0330154	7414	1851	709	0.383036	0.0956299	TF:M07611	TF	Factor: p54NRB; motif: GRNNNMGGATGRMNNCGGA	21866	2592
Tgfbr3l	transforming growth factor, beta receptor III-like [Source:MGI Symbol;Acc:MGI:3833469]		TRUE	0.0392496	1039	1851	126	0.0680713	0.12127	TF:M07475_1	TF	Factor: Tbx5; motif: SNAGGTGTGRNGGSS; match class: 1	21866	3515
Thada	thyroid adenoma associated [Source:MGI Symbol;Acc:MGI:3039623]		TRUE	0.0392956	5321	1851	524	0.28309	0.0984777	TF:M00281	TF	Factor: RFX1; motif: NNGTNRCNATRGYAACNN	21866	2876
Thoc1	THO complex 1 [Source:MGI Symbol;Acc:MGI:1919668]		TRUE	0.0423237	3071	1851	320	0.17288	0.104201	TF:M10357	TF	Factor: Rfxdc1; motif: NNGTTGCYNKG	21866	2902
Thra	thyroid hormone receptor alpha [Source:MGI Symbol;Acc:MGI:98742]		TRUE	0.0462871	6085	1851	591	0.319287	0.0971241	TF:M00927	TF	Factor: AP-4; motif: RNCAGCTGC	21866	128
Thrb	thyroid hormone receptor beta [Source:MGI Symbol;Acc:MGI:98743]		TRUE	9.01667e-05	15	563	10	0.017762	0.666667	WP:WP103	WP	Cholesterol biosynthesis	4531	121
Thrsp	thyroid hormone responsive [Source:MGI Symbol;Acc:MGI:109126]		TRUE	0.000208387	92	563	28	0.0497336	0.304348	WP:WP295	WP	Electron transport chain	4531	5
Tia1	cytotoxic granule-associated RNA binding protein 1 [Source:MGI Symbol;Acc:MGI:107914]		TRUE	0.000265304	42	563	17	0.0301954	0.404762	WP:WP1983	WP	Splicing factor NOVA regulated synaptic proteins	4531	14
Tiam2	T cell lymphoma invasion and metastasis 2 [Source:MGI Symbol;Acc:MGI:1344338]		TRUE	0.000436187	52	563	19	0.0337478	0.365385	WP:WP4346	WP	Cholesterol metabolism with Bloch and Kandutsch-Russell pathways	4531	120
Ticam2	toll-like receptor adaptor molecule 2 [Source:MGI Symbol;Acc:MGI:3040056]		TRUE	0.00162112	61	563	20	0.035524	0.327869	WP:WP1270	WP	Endochondral ossification	4531	73
Timp3	tissue inhibitor of metalloproteinase 3 [Source:MGI Symbol;Acc:MGI:98754]		TRUE	0.00223347	72	563	22	0.0390764	0.305556	WP:WP5298	WP	Dravet syndrome: Scn1a-A1783V point mutation model	4531	8
Timp4	tissue inhibitor of metalloproteinase 4 [Source:MGI Symbol;Acc:MGI:109125]		TRUE	0.0178811	144	563	33	0.0586146	0.229167	WP:WP553	WP	Calcium regulation in cardiac cells	4531	48
Tjp1	tight junction protein 1 [Source:MGI Symbol;Acc:MGI:98759]
Tlcd1	TLC domain containing 1 [Source:MGI Symbol;Acc:MGI:1915572]
Tle2	transducin-like enhancer of split 2 [Source:MGI Symbol;Acc:MGI:104635]
Tlnrd1	talin rod domain containing 1 [Source:MGI Symbol;Acc:MGI:1891420]
Tmbim6	transmembrane BAX inhibitor motif containing 6 [Source:MGI Symbol;Acc:MGI:99682]
Tmc7	transmembrane channel-like gene family 7 [Source:MGI Symbol;Acc:MGI:2443317]
Tmcc1	transmembrane and coiled coil domains 1 [Source:MGI Symbol;Acc:MGI:2442368]
Tmcc2	transmembrane and coiled-coil domains 2 [Source:MGI Symbol;Acc:MGI:1916125]
Tmcc3	transmembrane and coiled coil domains 3 [Source:MGI Symbol;Acc:MGI:2442900]
Tmem100	transmembrane protein 100 [Source:MGI Symbol;Acc:MGI:1915138]
Tmem117	transmembrane protein 117 [Source:MGI Symbol;Acc:MGI:2444580]
Tmem132b	transmembrane protein 132B [Source:MGI Symbol;Acc:MGI:3609245]
Tmem161b	transmembrane protein 161B [Source:MGI Symbol;Acc:MGI:1919995]
Tmem164	transmembrane protein 164 [Source:MGI Symbol;Acc:MGI:2148020]
Tmem176a	transmembrane protein 176A [Source:MGI Symbol;Acc:MGI:1913308]
Tmem176b	transmembrane protein 176B [Source:MGI Symbol;Acc:MGI:1916348]
Tmem178b	transmembrane protein 178B [Source:MGI Symbol;Acc:MGI:3647581]
Tmem179	transmembrane protein 179 [Source:MGI Symbol;Acc:MGI:2144891]
Tmem181a	transmembrane protein 181A [Source:MGI Symbol;Acc:MGI:1924356]
Tmem191	transmembrane protein 191 [Source:MGI Symbol;Acc:MGI:107238]
Tmem204	transmembrane protein 204 [Source:MGI Symbol;Acc:MGI:3039635]
Tmem212	transmembrane protein 212 [Source:MGI Symbol;Acc:MGI:2685410]
Tmem216	transmembrane protein 216 [Source:MGI Symbol;Acc:MGI:1920020]
Tmem229a	transmembrane protein 229A [Source:MGI Symbol;Acc:MGI:2442812]
Tmem245	transmembrane protein 245 [Source:MGI Symbol;Acc:MGI:2445107]
Tmem256	transmembrane protein 256 [Source:MGI Symbol;Acc:MGI:1916436]
Tmem37	transmembrane protein 37 [Source:MGI Symbol;Acc:MGI:2157899]
Tmem44	transmembrane protein 44 [Source:MGI Symbol;Acc:MGI:1924489]
Tmem59	transmembrane protein 59 [Source:MGI Symbol;Acc:MGI:1929278]
Tmem86a	transmembrane protein 86A [Source:MGI Symbol;Acc:MGI:1915143]
Tmem87a	transmembrane protein 87A [Source:MGI Symbol;Acc:MGI:2441844]
Tmem9b	TMEM9 domain family, member B [Source:MGI Symbol;Acc:MGI:1915254]
Tmsb4x	thymosin, beta 4, X chromosome [Source:MGI Symbol;Acc:MGI:99510]
Tmtc2	transmembrane and tetratricopeptide repeat containing 2 [Source:MGI Symbol;Acc:MGI:1914057]
Tmx4	thioredoxin-related transmembrane protein 4 [Source:MGI Symbol;Acc:MGI:106558]
Tnfrsf19	tumor necrosis factor receptor superfamily, member 19 [Source:MGI Symbol;Acc:MGI:1352474]
Tnik	TRAF2 and NCK interacting kinase [Source:MGI Symbol;Acc:MGI:1916264]
Tnk2	tyrosine kinase, non-receptor, 2 [Source:MGI Symbol;Acc:MGI:1858308]
Tnrc18	trinucleotide repeat containing 18 [Source:MGI Symbol;Acc:MGI:3648294]
Tnrc6a	trinucleotide repeat containing 6a [Source:MGI Symbol;Acc:MGI:2385292]
Tnrc6b	trinucleotide repeat containing 6b [Source:MGI Symbol;Acc:MGI:2443730]
Tnrc6c	trinucleotide repeat containing 6C [Source:MGI Symbol;Acc:MGI:2443265]
Tns1	tensin 1 [Source:MGI Symbol;Acc:MGI:104552]
Togaram2	TOG array regulator of axonemal microtubules 2 [Source:MGI Symbol;Acc:MGI:2443498]
Tom1l1	target of myb1-like 1 (chicken) [Source:MGI Symbol;Acc:MGI:1919193]
Tom1l2	target of myb1-like 2 (chicken) [Source:MGI Symbol;Acc:MGI:2443306]
Tomm7	translocase of outer mitochondrial membrane 7 [Source:MGI Symbol;Acc:MGI:1913419]
Tox	thymocyte selection-associated high mobility group box [Source:MGI Symbol;Acc:MGI:2181659]
Tox2	TOX high mobility group box family member 2 [Source:MGI Symbol;Acc:MGI:3611233]
Tpcn1	two pore channel 1 [Source:MGI Symbol;Acc:MGI:2182472]
Tpd52l1	tumor protein D52-like 1 [Source:MGI Symbol;Acc:MGI:1298386]
Trac	T cell receptor alpha constant [Source:MGI Symbol;Acc:MGI:4439838]
Traj27	T cell receptor alpha joining 27 [Source:MGI Symbol;Acc:MGI:4439741]
Traj33	T cell receptor alpha joining 33 [Source:MGI Symbol;Acc:MGI:4439590]
Trhde	TRH-degrading enzyme [Source:MGI Symbol;Acc:MGI:2384311]
Trib2	tribbles pseudokinase 2 [Source:MGI Symbol;Acc:MGI:2145021]
Tril	TLR4 interactor with leucine-rich repeats [Source:MGI Symbol;Acc:MGI:1914123]
Trim2	tripartite motif-containing 2 [Source:MGI Symbol;Acc:MGI:1933163]
Trim8	tripartite motif-containing 8 [Source:MGI Symbol;Acc:MGI:1933302]
Trim9	tripartite motif-containing 9 [Source:MGI Symbol;Acc:MGI:2137354]
Trip11	thyroid hormone receptor interactor 11 [Source:MGI Symbol;Acc:MGI:1924393]
Trip12	thyroid hormone receptor interactor 12 [Source:MGI Symbol;Acc:MGI:1309481]
Trmt9b	tRNA methyltransferase 9B [Source:MGI Symbol;Acc:MGI:2442328]
Trp63	transformation related protein 63 [Source:MGI Symbol;Acc:MGI:1330810]
Trpm3	transient receptor potential cation channel, subfamily M, member 3 [Source:MGI Symbol;Acc:MGI:2443101]
Trpm7	transient receptor potential cation channel, subfamily M, member 7 [Source:MGI Symbol;Acc:MGI:1929996]
Trps1	transcriptional repressor GATA binding 1 [Source:MGI Symbol;Acc:MGI:1927616]
Tsc22d3	TSC22 domain family, member 3 [Source:MGI Symbol;Acc:MGI:1196284]
Spacdr	sperm acrosome developmental regulator [Source:MGI Symbol;Acc:MGI:1926079]
Tshr	thyroid stimulating hormone receptor [Source:MGI Symbol;Acc:MGI:98849]
Tshz2	teashirt zinc finger family member 2 [Source:MGI Symbol;Acc:MGI:2153084]
Tsix	X (inactive)-specific transcript, opposite strand [Source:MGI Symbol;Acc:MGI:1336196]
Tsnaxip1	translin-associated factor X (Tsnax) interacting protein 1 [Source:MGI Symbol;Acc:MGI:1919486]
Tspan5	tetraspanin 5 [Source:MGI Symbol;Acc:MGI:1928096]
Tspan7	tetraspanin 7 [Source:MGI Symbol;Acc:MGI:1298407]
Tspan9	tetraspanin 9 [Source:MGI Symbol;Acc:MGI:1924558]
Tspoap1	TSPO associated protein 1 [Source:MGI Symbol;Acc:MGI:2450877]
Tst	thiosulfate sulfurtransferase, mitochondrial [Source:MGI Symbol;Acc:MGI:98852]
Ttc12	tetratricopeptide repeat domain 12 [Source:MGI Symbol;Acc:MGI:2444588]
Ttc17	tetratricopeptide repeat domain 17 [Source:MGI Symbol;Acc:MGI:1921819]
Ttc21a	tetratricopeptide repeat domain 21A [Source:MGI Symbol;Acc:MGI:1921302]
Ttc23	tetratricopeptide repeat domain 23 [Source:MGI Symbol;Acc:MGI:1914259]
Ttc28	tetratricopeptide repeat domain 28 [Source:MGI Symbol;Acc:MGI:2140873]
Ttc29	tetratricopeptide repeat domain 29 [Source:MGI Symbol;Acc:MGI:1920551]
Ttc3	tetratricopeptide repeat domain 3 [Source:MGI Symbol;Acc:MGI:1276539]
Ttc7b	tetratricopeptide repeat domain 7B [Source:MGI Symbol;Acc:MGI:2144724]
Ttll3	tubulin tyrosine ligase-like family, member 3 [Source:MGI Symbol;Acc:MGI:2141418]
Ttll4	tubulin tyrosine ligase-like family, member 4 [Source:MGI Symbol;Acc:MGI:1914784]
Ttll5	tubulin tyrosine ligase-like family, member 5 [Source:MGI Symbol;Acc:MGI:2443657]
Ttll6	tubulin tyrosine ligase-like family, member 6 [Source:MGI Symbol;Acc:MGI:2683461]
Ttll8	tubulin tyrosine ligase-like family, member 8 [Source:MGI Symbol;Acc:MGI:1922902]
Ttyh1	tweety family member 1 [Source:MGI Symbol;Acc:MGI:1889007]
Tuba1a	tubulin, alpha 1A [Source:MGI Symbol;Acc:MGI:98869]
Tubb2a	tubulin, beta 2A class IIA [Source:MGI Symbol;Acc:MGI:107861]
Tubb2b	tubulin, beta 2B class IIB [Source:MGI Symbol;Acc:MGI:1920960]
Tut4	terminal uridylyl transferase 4 [Source:MGI Symbol;Acc:MGI:2445126]
U2surp	U2 snRNP-associated SURP domain containing [Source:MGI Symbol;Acc:MGI:1915208]
Gm11808	predicted gene 11808 [Source:MGI Symbol;Acc:MGI:3649356]
Uba52	ubiquitin A-52 residue ribosomal protein fusion product 1 [Source:MGI Symbol;Acc:MGI:98887]
Ubash3b	ubiquitin associated and SH3 domain containing, B [Source:MGI Symbol;Acc:MGI:1920078]
Ube2e2	ubiquitin-conjugating enzyme E2E 2 [Source:MGI Symbol;Acc:MGI:2384997]
Ube3c	ubiquitin protein ligase E3C [Source:MGI Symbol;Acc:MGI:2140998]
Ube4bos1	ubiquitination factor E4B, opposite strand 1 [Source:MGI Symbol;Acc:MGI:1925072]
Ubr1	ubiquitin protein ligase E3 component n-recognin 1 [Source:MGI Symbol;Acc:MGI:1277977]
Ubr3	ubiquitin protein ligase E3 component n-recognin 3 [Source:MGI Symbol;Acc:MGI:1861100]
Ubr5	ubiquitin protein ligase E3 component n-recognin 5 [Source:MGI Symbol;Acc:MGI:1918040]
Ubxn11	UBX domain protein 11 [Source:MGI Symbol;Acc:MGI:1914836]
Uckl1os	uridine-cytidine kinase 1-like 1, opposite strand [Source:MGI Symbol;Acc:MGI:3801877]
Uggt2	UDP-glucose glycoprotein glucosyltransferase 2 [Source:MGI Symbol;Acc:MGI:1913685]
Ulk4	unc-51-like kinase 4 [Source:MGI Symbol;Acc:MGI:1921622]
Umad1	UMAP1-MVP12 associated (UMA) domain containing 1 [Source:MGI Symbol;Acc:MGI:3840148]
Unc13c	unc-13 homolog C [Source:MGI Symbol;Acc:MGI:2149021]
Unc5cl	unc-5 family C-terminal like [Source:MGI Symbol;Acc:MGI:1923839]
Unc80	unc-80, NALCN activator [Source:MGI Symbol;Acc:MGI:2652882]
Upp2	uridine phosphorylase 2 [Source:MGI Symbol;Acc:MGI:1923904]
Uqcc2	ubiquinol-cytochrome c reductase complex assembly factor 2 [Source:MGI Symbol;Acc:MGI:1914517]
Uqcr10	ubiquinol-cytochrome c reductase, complex III subunit X [Source:MGI Symbol;Acc:MGI:1913402]
Uqcr11	ubiquinol-cytochrome c reductase, complex III subunit XI [Source:MGI Symbol;Acc:MGI:1913844]
Uqcrb	ubiquinol-cytochrome c reductase binding protein [Source:MGI Symbol;Acc:MGI:1914780]
Uqcrc1	ubiquinol-cytochrome c reductase core protein 1 [Source:MGI Symbol;Acc:MGI:107876]
Uqcrfs1	ubiquinol-cytochrome c reductase, Rieske iron-sulfur polypeptide 1 [Source:MGI Symbol;Acc:MGI:1913944]
Urgcp	upregulator of cell proliferation [Source:MGI Symbol;Acc:MGI:1919296]
Usp15	ubiquitin specific peptidase 15 [Source:MGI Symbol;Acc:MGI:101857]
Usp34	ubiquitin specific peptidase 34 [Source:MGI Symbol;Acc:MGI:109473]
Usp45	ubiquitin specific petidase 45 [Source:MGI Symbol;Acc:MGI:101850]
Usp54	ubiquitin specific peptidase 54 [Source:MGI Symbol;Acc:MGI:1926037]
Usp6nl	USP6 N-terminal like [Source:MGI Symbol;Acc:MGI:2138893]
Utrn	utrophin [Source:MGI Symbol;Acc:MGI:104631]
Uty	ubiquitously transcribed tetratricopeptide repeat containing, Y-linked [Source:MGI Symbol;Acc:MGI:894810]
Vamp1	vesicle-associated membrane protein 1 [Source:MGI Symbol;Acc:MGI:1313276]
Vash1	vasohibin 1 [Source:MGI Symbol;Acc:MGI:2442543]
Vav3	vav 3 oncogene [Source:MGI Symbol;Acc:MGI:1888518]
Vcl	vinculin [Source:MGI Symbol;Acc:MGI:98927]
Vegfa	vascular endothelial growth factor A [Source:MGI Symbol;Acc:MGI:103178]
Vim	vimentin [Source:MGI Symbol;Acc:MGI:98932]
Vps13a	vacuolar protein sorting 13A [Source:MGI Symbol;Acc:MGI:2444304]
Vps13b	vacuolar protein sorting 13B [Source:MGI Symbol;Acc:MGI:1916380]
Vps13c	vacuolar protein sorting 13C [Source:MGI Symbol;Acc:MGI:2444207]
Vps13d	vacuolar protein sorting 13D [Source:MGI Symbol;Acc:MGI:2448530]
Vps54	VPS54 GARP complex subunit [Source:MGI Symbol;Acc:MGI:2178798]
Vsnl1	visinin-like 1 [Source:MGI Symbol;Acc:MGI:1349453]
Vstm4	V-set and transmembrane domain containing 4 [Source:MGI Symbol;Acc:MGI:2444633]
Vti1a	vesicle transport through interaction with t-SNAREs 1A [Source:MGI Symbol;Acc:MGI:1855699]
Vwa3a	von Willebrand factor A domain containing 3A [Source:MGI Symbol;Acc:MGI:3041229]
Vwa8	von Willebrand factor A domain containing 8 [Source:MGI Symbol;Acc:MGI:1919008]
Wars2	tryptophanyl tRNA synthetase 2 (mitochondrial) [Source:MGI Symbol;Acc:MGI:1917810]
Wasf3	WASP family, member 3 [Source:MGI Symbol;Acc:MGI:2658986]
Washc2	WASH complex subunit 2 [Source:MGI Symbol;Acc:MGI:106463]
Wdfy3	WD repeat and FYVE domain containing 3 [Source:MGI Symbol;Acc:MGI:1096875]
Wdpcp	WD repeat containing planar cell polarity effector [Source:MGI Symbol;Acc:MGI:2144467]
Wdr17	WD repeat domain 17 [Source:MGI Symbol;Acc:MGI:1924662]
Wdr33	WD repeat domain 33 [Source:MGI Symbol;Acc:MGI:1921570]
Wdr49	WD repeat domain 49 [Source:MGI Symbol;Acc:MGI:3645287]
Wdr66	WD repeat domain 66 [Source:MGI Symbol;Acc:MGI:1918495]
Wdr7	WD repeat domain 7 [Source:MGI Symbol;Acc:MGI:1860197]
Whamm	WAS protein homolog associated with actin, golgi membranes and microtubules [Source:MGI Symbol;Acc:MGI:2142282]
Wipf1	WAS/WASL interacting protein family, member 1 [Source:MGI Symbol;Acc:MGI:2178801]
Wls	wntless WNT ligand secretion mediator [Source:MGI Symbol;Acc:MGI:1915401]
Wnk1	WNK lysine deficient protein kinase 1 [Source:MGI Symbol;Acc:MGI:2442092]
Wnk2	WNK lysine deficient protein kinase 2 [Source:MGI Symbol;Acc:MGI:1922857]
Wnt7a	wingless-type MMTV integration site family, member 7A [Source:MGI Symbol;Acc:MGI:98961]
Wsb1	WD repeat and SOCS box-containing 1 [Source:MGI Symbol;Acc:MGI:1926139]
Wwc1	WW, C2 and coiled-coil domain containing 1 [Source:MGI Symbol;Acc:MGI:2388637]
Wwox	WW domain-containing oxidoreductase [Source:MGI Symbol;Acc:MGI:1931237]
Xist	inactive X specific transcripts [Source:MGI Symbol;Acc:MGI:98974]
Xkr6	X-linked Kx blood group related 6 [Source:MGI Symbol;Acc:MGI:2447765]
Xpr1	xenotropic and polytropic retrovirus receptor 1 [Source:MGI Symbol;Acc:MGI:97932]
Xrn1	5'-3' exoribonuclease 1 [Source:MGI Symbol;Acc:MGI:891964]
Xylt1	xylosyltransferase 1 [Source:MGI Symbol;Acc:MGI:2451073]
Ypel3	yippee like 3 [Source:MGI Symbol;Acc:MGI:1913340]
Zbbx	zinc finger, B-box domain containing [Source:MGI Symbol;Acc:MGI:2674085]
Zbtb16	zinc finger and BTB domain containing 16 [Source:MGI Symbol;Acc:MGI:103222]
Zbtb20	zinc finger and BTB domain containing 20 [Source:MGI Symbol;Acc:MGI:1929213]
Zbtb7c	zinc finger and BTB domain containing 7C [Source:MGI Symbol;Acc:MGI:2443302]
Zc3h12b	zinc finger CCCH-type containing 12B [Source:MGI Symbol;Acc:MGI:2442133]
Zc3hav1	zinc finger CCCH type, antiviral 1 [Source:MGI Symbol;Acc:MGI:1926031]
Zcwpw2	zinc finger, CW type with PWWP domain 2 [Source:MGI Symbol;Acc:MGI:1921888]
Zeb1	zinc finger E-box binding homeobox 1 [Source:MGI Symbol;Acc:MGI:1344313]
Zfhx3	zinc finger homeobox 3 [Source:MGI Symbol;Acc:MGI:99948]
Zfhx4	zinc finger homeodomain 4 [Source:MGI Symbol;Acc:MGI:2137668]
Zfp157	zinc finger protein 157 [Source:MGI Symbol;Acc:MGI:1919404]
Zfp160	zinc finger protein 160 [Source:MGI Symbol;Acc:MGI:108187]
Zfp217	zinc finger protein 217 [Source:MGI Symbol;Acc:MGI:2685408]
Zfp329	zinc finger protein 329 [Source:MGI Symbol;Acc:MGI:1921283]
Zfp36	zinc finger protein 36 [Source:MGI Symbol;Acc:MGI:99180]
Zfp385a	zinc finger protein 385A [Source:MGI Symbol;Acc:MGI:1352495]
Zfp398	zinc finger protein 398 [Source:MGI Symbol;Acc:MGI:1917856]
Zfp407	zinc finger protein 407 [Source:MGI Symbol;Acc:MGI:2685179]
Zfp423	zinc finger protein 423 [Source:MGI Symbol;Acc:MGI:1891217]
Zfp451	zinc finger protein 451 [Source:MGI Symbol;Acc:MGI:2137896]
Zfp462	zinc finger protein 462 [Source:MGI Symbol;Acc:MGI:107690]
Zfp516	zinc finger protein 516 [Source:MGI Symbol;Acc:MGI:2443957]
Zfp521	zinc finger protein 521 [Source:MGI Symbol;Acc:MGI:95459]
Zfp532	zinc finger protein 532 [Source:MGI Symbol;Acc:MGI:3036282]
Zfp536	zinc finger protein 536 [Source:MGI Symbol;Acc:MGI:1926102]
Zfp592	zinc finger protein 592 [Source:MGI Symbol;Acc:MGI:2443541]
Zfp608	zinc finger protein 608 [Source:MGI Symbol;Acc:MGI:2442338]
Zfp638	zinc finger protein 638 [Source:MGI Symbol;Acc:MGI:1203484]
Zfp641	zinc finger protein 641 [Source:MGI Symbol;Acc:MGI:2442788]
Zfp644	zinc finger protein 644 [Source:MGI Symbol;Acc:MGI:1277212]
Zfp799	zinc finger protein 799 [Source:MGI Symbol;Acc:MGI:2443934]
Zfp808	zinc finger protein 808 [Source:MGI Symbol;Acc:MGI:3704127]
Zfp827	zinc finger protein 827 [Source:MGI Symbol;Acc:MGI:2444807]
Zfp950	zinc finger protein 950 [Source:MGI Symbol;Acc:MGI:2652824]
Zfp981	zinc finger protein 981 [Source:MGI Symbol;Acc:MGI:3700965]
Zfpm2	zinc finger protein, multitype 2 [Source:MGI Symbol;Acc:MGI:1334444]
Zhx2	zinc fingers and homeoboxes 2 [Source:MGI Symbol;Acc:MGI:2683087]
Zic1	zinc finger protein of the cerebellum 1 [Source:MGI Symbol;Acc:MGI:106683]
Zic4	zinc finger protein of the cerebellum 4 [Source:MGI Symbol;Acc:MGI:107201]
Zmynd10	zinc finger, MYND domain containing 10 [Source:MGI Symbol;Acc:MGI:2387863]
Znrf3	zinc and ring finger 3 [Source:MGI Symbol;Acc:MGI:3039616]
Zscan26	zinc finger and SCAN domain containing 26 [Source:MGI Symbol;Acc:MGI:3531417]
Zswim5	zinc finger SWIM-type containing 5 [Source:MGI Symbol;Acc:MGI:1921714]
Zup1	zinc finger containing ubiquitin peptidase 1 [Source:MGI Symbol;Acc:MGI:1919830]
Zzef1	zinc finger, ZZ-type with EF hand domain 1 [Source:MGI Symbol;Acc:MGI:2444286]

## Sheet: Direct_feature_selection_ANOVA
gene	description		significant	p_value	term_size	query_size	intersection_size	precision	recall	term_id	source	term_name	effective_domain_size	source_order
1110065P20Rik	RIKEN cDNA 1110065P20 gene [Source:MGI Symbol;Acc:MGI:1916170]		TRUE	2.78128e-111	2555	1870	501	0.267914	0.196086	GO:0007399	GO:BP	nervous system development	27205	2969
1190005I06Rik	RIKEN cDNA 1190005I06 gene [Source:MGI Symbol;Acc:MGI:1916168]		TRUE	1.55568e-106	6228	1870	848	0.453476	0.136159	GO:0048856	GO:BP	anatomical structure development	27205	13840
1500004A13Rik	RIKEN cDNA 1500004A13 gene [Source:MGI Symbol;Acc:MGI:2442808]		TRUE	3.0761e-106	4115	1870	655	0.350267	0.159174	GO:0048731	GO:BP	system development	27205	13728
1500011B03Rik	RIKEN cDNA 1500011B03 gene [Source:MGI Symbol;Acc:MGI:1913486]		TRUE	2.11101e-101	6865	1870	891	0.476471	0.129789	GO:0032502	GO:BP	developmental process	27205	8032
1700030F04Rik	RIKEN cDNA 1700030F04 gene [Source:MGI Symbol;Acc:MGI:1919513]		TRUE	3.06123e-100	4873	1870	715	0.382353	0.146727	GO:0007275	GO:BP	multicellular organism development	27205	2871
1700060O08Rik	RIKEN cDNA 1700060O08 gene [Source:MGI Symbol;Acc:MGI:1914585]		TRUE	1.15032e-93	1871	1870	393	0.21016	0.210048	GO:0022008	GO:BP	neurogenesis	27205	6923
1810037I17Rik	RIKEN cDNA 1810037I17 gene [Source:MGI Symbol;Acc:MGI:1914954]		TRUE	9.02093e-89	1631	1870	356	0.190374	0.218271	GO:0048699	GO:BP	generation of neurons	27205	13696
1810058I24Rik	RIKEN cDNA 1810058I24 gene [Source:MGI Symbol;Acc:MGI:1914955]		TRUE	3.4462e-85	1555	1870	341	0.182353	0.219293	GO:0030182	GO:BP	neuron differentiation	27205	7062
2010001K21Rik	RIKEN cDNA 2010001K21 gene [Source:MGI Symbol;Acc:MGI:1917079]		TRUE	9.24626e-85	1633	1870	350	0.187166	0.214329	GO:0120036	GO:BP	plasma membrane bounded cell projection organization	27205	20549
2210408F21Rik	RIKEN cDNA 2210408F21 gene [Source:MGI Symbol;Acc:MGI:1920902]		TRUE	5.43121e-82	1669	1870	350	0.187166	0.209706	GO:0030030	GO:BP	cell projection organization	27205	7016
2210408I21Rik	RIKEN cDNA 2210408I21 gene [Source:MGI Symbol;Acc:MGI:1919621]		TRUE	2.13933e-80	6732	1870	833	0.445455	0.123737	GO:0048518	GO:BP	positive regulation of biological process	27205	13539
2310022B05Rik	RIKEN cDNA 2310022B05 gene [Source:MGI Symbol;Acc:MGI:1916801]		TRUE	9.80279e-80	5997	1870	770	0.411765	0.128398	GO:0048522	GO:BP	positive regulation of cellular process	27205	13543
2410006H16Rik	RIKEN cDNA 2410006H16 gene [Source:MGI Symbol;Acc:MGI:1916471]		TRUE	1.44532e-78	4748	1870	658	0.351872	0.138585	GO:0048869	GO:BP	cellular developmental process	27205	13852
2610035D17Rik	RIKEN cDNA 2610035D17 gene [Source:MGI Symbol;Acc:MGI:1919636]		TRUE	1.46821e-78	4715	1870	655	0.350267	0.138918	GO:0030154	GO:BP	cell differentiation	27205	7050
2610307P16Rik	RIKEN cDNA 2610307P16 gene [Source:MGI Symbol;Acc:MGI:1919768]		TRUE	3.39356e-77	1266	1870	292	0.15615	0.230648	GO:0048666	GO:BP	neuron development	27205	13664
2810459M11Rik	RIKEN cDNA 2810459M11 gene [Source:MGI Symbol;Acc:MGI:1920042]		TRUE	1.33187e-75	1110	1870	269	0.14385	0.242342	GO:0031175	GO:BP	neuron projection development	27205	7471
3110039M20Rik	RIKEN cDNA 3110039M20 gene [Source:MGI Symbol;Acc:MGI:1914543]		TRUE	2.26732e-74	12308	1870	1233	0.659358	0.100179	GO:0050794	GO:BP	regulation of cellular process	27205	14008
3300002A11Rik	RIKEN cDNA 3300002A11 gene [Source:MGI Symbol;Acc:MGI:1919073]		TRUE	5.12886e-74	2787	1870	460	0.245989	0.165052	GO:0009653	GO:BP	anatomical structure morphogenesis	27205	3648
4632427E13Rik	RIKEN cDNA 4632427E13 gene [Source:MGI Symbol;Acc:MGI:1915436]		TRUE	1.70025e-71	3244	1870	501	0.267914	0.154439	GO:0065008	GO:BP	regulation of biological quality	27205	16812
4732471J01Rik	RIKEN cDNA 4732471J01 gene [Source:MGI Symbol;Acc:MGI:3603586]		TRUE	5.53009e-71	4975	1870	661	0.353476	0.132864	GO:0048523	GO:BP	negative regulation of cellular process	27205	13544
4930445B16Rik	RIKEN cDNA 4930445B16 gene [Source:MGI Symbol;Acc:MGI:1922130]		TRUE	1.1441e-70	3570	1870	531	0.283957	0.148739	GO:0023051	GO:BP	regulation of signaling	27205	7001
4930447C04Rik	RIKEN cDNA 4930447C04 gene [Source:MGI Symbol;Acc:MGI:1923051]		TRUE	1.4958e-70	5491	1870	705	0.377005	0.128392	GO:0051179	GO:BP	localization	27205	14323
4930470G03Rik	RIKEN cDNA 4930470G03 gene [Source:MGI Symbol;Acc:MGI:1922171]		TRUE	1.72592e-70	3574	1870	531	0.283957	0.148573	GO:0010646	GO:BP	regulation of cell communication	27205	4388
4930517O19Rik	RIKEN cDNA 4930517O19 gene [Source:MGI Symbol;Acc:MGI:1922325]		TRUE	6.79945e-70	13838	1870	1323	0.707487	0.0956063	GO:0065007	GO:BP	biological regulation	27205	16811
4930570B17Rik	RIKEN cDNA 4930570B17 gene [Source:MGI Symbol;Acc:MGI:1923191]		TRUE	7.42487e-68	3139	1870	483	0.258289	0.153871	GO:0048468	GO:BP	cell development	27205	13507
Bltp1	bridge-like lipid transfer protein family member 1 [Source:MGI Symbol;Acc:MGI:2444631]		TRUE	1.47701e-67	13424	1870	1290	0.68984	0.0960965	GO:0050789	GO:BP	regulation of biological process	27205	14004
4933407L21Rik	RIKEN cDNA 4933407L21 gene [Source:MGI Symbol;Acc:MGI:1918391]		TRUE	4.63972e-65	2582	1870	421	0.225134	0.163052	GO:0051128	GO:BP	regulation of cellular component organization	27205	14274
5031425E22Rik	RIKEN cDNA 5031425E22 gene [Source:MGI Symbol;Acc:MGI:1923227]		TRUE	1.84755e-64	4823	1870	632	0.337968	0.131039	GO:0051234	GO:BP	establishment of localization	27205	14353
5031439G07Rik	RIKEN cDNA 5031439G07 gene [Source:MGI Symbol;Acc:MGI:2444899]		TRUE	4.97266e-62	4664	1870	612	0.327273	0.131218	GO:0006810	GO:BP	transport	27205	2546
5330438D12Rik	RIKEN cDNA 5330438D12 gene [Source:MGI Symbol;Acc:MGI:3026931]		TRUE	2.50031e-61	6000	1870	725	0.387701	0.120833	GO:0048519	GO:BP	negative regulation of biological process	27205	13540
5730522E02Rik	RIKEN cDNA 5730522E02 gene [Source:MGI Symbol;Acc:MGI:1917876]		TRUE	3.20134e-58	1737	1870	317	0.169519	0.182499	GO:0048870	GO:BP	cell motility	27205	13853
6030443J06Rik	RIKEN cDNA 6030443J06 gene [Source:MGI Symbol;Acc:MGI:2444595]		TRUE	1.57413e-56	1048	1870	232	0.124064	0.221374	GO:0000902	GO:BP	cell morphogenesis	27205	249
6330403K07Rik	RIKEN cDNA 6330403K07 gene [Source:MGI Symbol;Acc:MGI:1918001]		TRUE	5.92659e-55	3491	1870	488	0.260963	0.139788	GO:0051641	GO:BP	cellular localization	27205	14642
6530409C15Rik	RIKEN cDNA 6530409C15 gene [Source:MGI Symbol;Acc:MGI:1923474]		TRUE	1.47387e-54	2702	1870	411	0.219786	0.15211	GO:0050793	GO:BP	regulation of developmental process	27205	14007
6720427I07Rik	RIKEN cDNA 6720427I07 gene [Source:MGI Symbol;Acc:MGI:1924398]		TRUE	1.78629e-54	1542	1870	288	0.154011	0.18677	GO:0016477	GO:BP	cell migration	27205	5356
9430041J12Rik	RIKEN cDNA 9430041J12 gene [Source:MGI Symbol;Acc:MGI:1924573]		TRUE	3.66594e-53	720	1870	183	0.097861	0.254167	GO:0048858	GO:BP	cell projection morphogenesis	27205	13842
9530026P05Rik	RIKEN cDNA 9530026P05 gene [Source:MGI Symbol;Acc:MGI:1924659]		TRUE	4.51375e-53	3326	1870	468	0.250267	0.14071	GO:0048513	GO:BP	animal organ development	27205	13536
9630028H03Rik	RIKEN cDNA 9630028H03 gene [Source:MGI Symbol;Acc:MGI:2444526]		TRUE	4.69595e-53	714	1870	182	0.0973262	0.254902	GO:0120039	GO:BP	plasma membrane bounded cell projection morphogenesis	27205	20550
9930021J03Rik	RIKEN cDNA 9930021J03 gene [Source:MGI Symbol;Acc:MGI:2444398]		TRUE	6.31897e-53	751	1870	187	0.1	0.249001	GO:0032990	GO:BP	cell part morphogenesis	27205	8398
A230057D06Rik	RIKEN cDNA A230057D06 gene [Source:MGI Symbol;Acc:MGI:2442922]		TRUE	7.05518e-53	2293	1870	366	0.195722	0.159616	GO:0032879	GO:BP	regulation of localization	27205	8303
A2m	alpha-2-macroglobulin [Source:MGI Symbol;Acc:MGI:2449119]		TRUE	9.82359e-52	699	1870	178	0.0951872	0.254649	GO:0048812	GO:BP	neuron projection morphogenesis	27205	13798
A330023F24Rik	RIKEN cDNA A330023F24 gene [Source:MGI Symbol;Acc:MGI:2443958]		TRUE	3.97851e-51	7634	1870	828	0.442781	0.108462	GO:0016043	GO:BP	cellular component organization	27205	5200
A330076C08Rik	RIKEN cDNA A330076C08 gene [Source:MGI Symbol;Acc:MGI:2443693]		TRUE	6.78803e-50	851	1870	196	0.104813	0.230317	GO:0032989	GO:BP	cellular component morphogenesis	27205	8397
Smim29	small integral membrane protein 29 [Source:MGI Symbol;Acc:MGI:2146839]		TRUE	3.82263e-49	3246	1870	451	0.241176	0.13894	GO:0051239	GO:BP	regulation of multicellular organismal process	27205	14358
AI480526	expressed sequence AI480526 [Source:MGI Symbol;Acc:MGI:2140910]		TRUE	5.20279e-49	1930	1870	320	0.171123	0.165803	GO:0051049	GO:BP	regulation of transport	27205	14219
AW047730	expressed sequence AW047730 [Source:MGI Symbol;Acc:MGI:2139951]		TRUE	9.47879e-49	2982	1870	425	0.227273	0.142522	GO:0009966	GO:BP	regulation of signal transduction	27205	3882
AW554918	expressed sequence AW554918 [Source:MGI Symbol;Acc:MGI:2147376]		TRUE	2.84512e-48	1748	1870	299	0.159893	0.171053	GO:0007267	GO:BP	cell-cell signaling	27205	2864
AY036118	cDNA sequence AY036118 [Source:MGI Symbol;Acc:MGI:2158419]		TRUE	1.40231e-47	1400	1870	259	0.138503	0.185	GO:0040011	GO:BP	locomotion	27205	10464
Aak1	AP2 associated kinase 1 [Source:MGI Symbol;Acc:MGI:1098687]		TRUE	4.62272e-47	20731	1870	1670	0.893048	0.0805557	GO:0009987	GO:BP	cellular process	27205	3889
Aatk	apoptosis-associated tyrosine kinase [Source:MGI Symbol;Acc:MGI:1197518]		TRUE	5.45824e-47	7835	1870	831	0.444385	0.106063	GO:0071840	GO:BP	cellular component organization or biogenesis	27205	17895
Abat	4-aminobutyrate aminotransferase [Source:MGI Symbol;Acc:MGI:2443582]		TRUE	3.8396e-46	722	1870	173	0.0925134	0.239612	GO:0000904	GO:BP	cell morphogenesis involved in differentiation	27205	250
Abcc5	ATP-binding cassette, sub-family C (CFTR/MRP), member 5 [Source:MGI Symbol;Acc:MGI:1351644]		TRUE	6.77028e-46	1077	1870	218	0.116578	0.202414	GO:0007417	GO:BP	central nervous system development	27205	2983
Abcd2	ATP-binding cassette, sub-family D (ALD), member 2 [Source:MGI Symbol;Acc:MGI:1349467]		TRUE	2.1401e-45	643	1870	161	0.0860963	0.250389	GO:0048667	GO:BP	cell morphogenesis involved in neuron differentiation	27205	13665
Abhd14b	abhydrolase domain containing 14b [Source:MGI Symbol;Acc:MGI:1923741]		TRUE	2.75387e-45	739	1870	174	0.0930481	0.235453	GO:0120035	GO:BP	regulation of plasma membrane bounded cell projection organization	27205	20548
Abhd15	abhydrolase domain containing 15 [Source:MGI Symbol;Acc:MGI:1914727]		TRUE	1.01922e-44	753	1870	175	0.0935829	0.232404	GO:0031344	GO:BP	regulation of cell projection organization	27205	7530
Abhd18	abhydrolase domain containing 18 [Source:MGI Symbol;Acc:MGI:1915468]		TRUE	1.37689e-44	9152	1870	923	0.493583	0.100852	GO:0032501	GO:BP	multicellular organismal process	27205	8031
Abhd3	abhydrolase domain containing 3 [Source:MGI Symbol;Acc:MGI:2147183]		TRUE	1.18328e-43	2590	1870	375	0.200535	0.144788	GO:0065009	GO:BP	regulation of molecular function	27205	16813
Abhd4	abhydrolase domain containing 4 [Source:MGI Symbol;Acc:MGI:1915938]		TRUE	2.3368e-42	4056	1870	507	0.271123	0.125	GO:0048583	GO:BP	regulation of response to stimulus	27205	13594
Abi1	abl interactor 1 [Source:MGI Symbol;Acc:MGI:104913]		TRUE	1.26891e-41	798	1870	176	0.0941176	0.220551	GO:0034330	GO:BP	cell junction organization	27205	9021
Abl2	v-abl Abelson murine leukemia viral oncogene 2 (arg, Abelson-related gene) [Source:MGI Symbol;Acc:MGI:87860]		TRUE	7.12873e-41	7674	1870	799	0.427273	0.104118	GO:0007154	GO:BP	cell communication	27205	2781
Ablim1	actin-binding LIM protein 1 [Source:MGI Symbol;Acc:MGI:1194500]		TRUE	1.88253e-40	531	1870	138	0.0737968	0.259887	GO:0050808	GO:BP	synapse organization	27205	14020
Abr	active BCR-related gene [Source:MGI Symbol;Acc:MGI:107771]		TRUE	3.10314e-40	2813	1870	388	0.207487	0.137931	GO:0006793	GO:BP	phosphorus metabolic process	27205	2534
Acaca	acetyl-Coenzyme A carboxylase alpha [Source:MGI Symbol;Acc:MGI:108451]		TRUE	6.55091e-40	2790	1870	385	0.205882	0.137993	GO:0006796	GO:BP	phosphate-containing compound metabolic process	27205	2537
Acat3	acetyl-Coenzyme A acetyltransferase 3 [Source:MGI Symbol;Acc:MGI:109182]		TRUE	9.12628e-40	10596	1870	1012	0.541176	0.0955077	GO:0050896	GO:BP	response to stimulus	27205	14092
Ackr3	atypical chemokine receptor 3 [Source:MGI Symbol;Acc:MGI:109562]		TRUE	1.60538e-39	971	1870	194	0.103743	0.199794	GO:0030334	GO:BP	regulation of cell migration	27205	7143
Acot11	acyl-CoA thioesterase 11 [Source:MGI Symbol;Acc:MGI:1913736]		TRUE	2.57826e-39	941	1870	190	0.101604	0.201913	GO:0099536	GO:BP	synaptic signaling	27205	20177
Acot7	acyl-CoA thioesterase 7 [Source:MGI Symbol;Acc:MGI:1917275]		TRUE	2.63855e-39	6489	1870	701	0.374866	0.108029	GO:1901564	GO:BP	organonitrogen compound metabolic process	27205	22563
Acp1	acid phosphatase 1, soluble [Source:MGI Symbol;Acc:MGI:87881]		TRUE	6.06341e-39	7550	1870	783	0.418717	0.103709	GO:0023052	GO:BP	signaling	27205	7002
Acsbg1	acyl-CoA synthetase bubblegum family member 1 [Source:MGI Symbol;Acc:MGI:2385656]		TRUE	6.28594e-39	1030	1870	200	0.106952	0.194175	GO:2000145	GO:BP	regulation of cell motility	27205	26747
Acsl3	acyl-CoA synthetase long-chain family member 3 [Source:MGI Symbol;Acc:MGI:1921455]		TRUE	1.58101e-38	1966	1870	301	0.160963	0.153103	GO:0009719	GO:BP	response to endogenous stimulus	27205	3694
Acss1	acyl-CoA synthetase short-chain family member 1 [Source:MGI Symbol;Acc:MGI:1915988]		TRUE	2.21798e-38	2589	1870	362	0.193583	0.139822	GO:0070727	GO:BP	cellular macromolecule localization	27205	17211
Acss2	acyl-CoA synthetase short-chain family member 2 [Source:MGI Symbol;Acc:MGI:1890410]		TRUE	3.68764e-38	3941	1870	485	0.259358	0.123065	GO:0009893	GO:BP	positive regulation of metabolic process	27205	3831
Acss3	acyl-CoA synthetase short-chain family member 3 [Source:MGI Symbol;Acc:MGI:2685720]		TRUE	4.93373e-38	902	1870	183	0.097861	0.202882	GO:0099537	GO:BP	trans-synaptic signaling	27205	20178
Actb	actin, beta [Source:MGI Symbol;Acc:MGI:87904]		TRUE	6.85602e-38	2581	1870	360	0.192513	0.139481	GO:0008104	GO:BP	protein localization	27205	3195
Actg1	actin, gamma, cytoplasmic 1 [Source:MGI Symbol;Acc:MGI:87906]		TRUE	1.69576e-37	1078	1870	203	0.108556	0.188312	GO:0040012	GO:BP	regulation of locomotion	27205	10465
Actr3b	ARP3 actin-related protein 3B [Source:MGI Symbol;Acc:MGI:2661120]		TRUE	2.14401e-37	1246	1870	222	0.118717	0.17817	GO:0051130	GO:BP	positive regulation of cellular component organization	27205	14276
Acvr1c	activin A receptor, type IC [Source:MGI Symbol;Acc:MGI:2661081]		TRUE	8.13683e-37	547	1870	135	0.0721925	0.246801	GO:0010975	GO:BP	regulation of neuron projection development	27205	4665
Adam11	a disintegrin and metallopeptidase domain 11 [Source:MGI Symbol;Acc:MGI:1098667]		TRUE	9.4914e-37	1458	1870	244	0.130481	0.167353	GO:0051094	GO:BP	positive regulation of developmental process	27205	14249
Adam22	a disintegrin and metallopeptidase domain 22 [Source:MGI Symbol;Acc:MGI:1340046]		TRUE	1.95391e-36	5933	1870	647	0.345989	0.109051	GO:0080090	GO:BP	regulation of primary metabolic process	27205	18790
Adam23	a disintegrin and metallopeptidase domain 23 [Source:MGI Symbol;Acc:MGI:1345162]		TRUE	3.01729e-36	895	1870	179	0.0957219	0.2	GO:0098916	GO:BP	anterograde trans-synaptic signaling	27205	20010
Adamts1	a disintegrin-like and metallopeptidase (reprolysin type) with thrombospondin type 1 motif, 1 [Source:MGI Symbol;Acc:MGI:109249]		TRUE	3.01729e-36	895	1870	179	0.0957219	0.2	GO:0007268	GO:BP	chemical synaptic transmission	27205	2865
Adamts12	a disintegrin-like and metallopeptidase (reprolysin type) with thrombospondin type 1 motif, 12 [Source:MGI Symbol;Acc:MGI:2146046]		TRUE	6.75655e-36	1531	1870	250	0.13369	0.163292	GO:2000026	GO:BP	regulation of multicellular organismal development	27205	26633
Adamts20	a disintegrin-like and metallopeptidase (reprolysin type) with thrombospondin type 1 motif, 20 [Source:MGI Symbol;Acc:MGI:2660628]		TRUE	9.45926e-36	2607	1870	357	0.190909	0.136939	GO:0035556	GO:BP	intracellular signal transduction	27205	9589
Adcy2	adenylate cyclase 2 [Source:MGI Symbol;Acc:MGI:99676]		TRUE	1.12789e-35	3060	1870	399	0.213369	0.130392	GO:0031325	GO:BP	positive regulation of cellular metabolic process	27205	7512
Adcy8	adenylate cyclase 8 [Source:MGI Symbol;Acc:MGI:1341110]		TRUE	1.22362e-35	5510	1870	610	0.326203	0.110708	GO:0031323	GO:BP	regulation of cellular metabolic process	27205	7510
Adcyap1r1	adenylate cyclase activating polypeptide 1 receptor 1 [Source:MGI Symbol;Acc:MGI:108449]		TRUE	1.60277e-35	7262	1870	749	0.400535	0.10314	GO:0019222	GO:BP	regulation of metabolic process	27205	5900
Adgb	androglobin [Source:MGI Symbol;Acc:MGI:3605549]		TRUE	6.92123e-35	760	1870	160	0.0855615	0.210526	GO:0007610	GO:BP	behavior	27205	3139
Adgrb1	adhesion G protein-coupled receptor B1 [Source:MGI Symbol;Acc:MGI:1933736]		TRUE	6.92804e-35	1744	1870	270	0.144385	0.154817	GO:0045595	GO:BP	regulation of cell differentiation	27205	12146
Adgrb3	adhesion G protein-coupled receptor B3 [Source:MGI Symbol;Acc:MGI:2441837]		TRUE	9.21346e-35	5742	1870	626	0.334759	0.109021	GO:0051171	GO:BP	regulation of nitrogen compound metabolic process	27205	14316
Adgrg1	adhesion G protein-coupled receptor G1 [Source:MGI Symbol;Acc:MGI:1340051]		TRUE	2.74308e-34	3080	1870	397	0.212299	0.128896	GO:0033036	GO:BP	macromolecule localization	27205	8425
Adgrl2	adhesion G protein-coupled receptor L2 [Source:MGI Symbol;Acc:MGI:2139714]		TRUE	1.50534e-33	2895	1870	378	0.202139	0.13057	GO:0007166	GO:BP	cell surface receptor signaling pathway	27205	2793
Adgrl3	adhesion G protein-coupled receptor L3 [Source:MGI Symbol;Acc:MGI:2441950]		TRUE	2.00708e-33	3508	1870	433	0.231551	0.123432	GO:0006996	GO:BP	organelle organization	27205	2670
Adgrv1	adhesion G protein-coupled receptor V1 [Source:MGI Symbol;Acc:MGI:1274784]		TRUE	3.87466e-33	850	1870	168	0.0898396	0.197647	GO:0060322	GO:BP	head development	27205	15367
Adra1b	adrenergic receptor, alpha 1b [Source:MGI Symbol;Acc:MGI:104774]		TRUE	4.24579e-33	8908	1870	865	0.462567	0.0971037	GO:0051716	GO:BP	cellular response to stimulus	27205	14697
Adra2a	adrenergic receptor, alpha 2a [Source:MGI Symbol;Acc:MGI:87934]		TRUE	5.02817e-33	1281	1870	217	0.116043	0.169399	GO:0006811	GO:BP	monoatomic ion transport	27205	2547
Adrb1	adrenergic receptor, beta 1 [Source:MGI Symbol;Acc:MGI:87937]		TRUE	5.56523e-33	3198	1870	404	0.216043	0.126329	GO:0051173	GO:BP	positive regulation of nitrogen compound metabolic process	27205	14318
Afdn	afadin, adherens junction formation factor [Source:MGI Symbol;Acc:MGI:1314653]		TRUE	8.05959e-33	797	1870	161	0.0860963	0.202008	GO:0007420	GO:BP	brain development	27205	2986
Aff3	AF4/FMR2 family, member 3 [Source:MGI Symbol;Acc:MGI:106927]		TRUE	1.56459e-32	1004	1870	185	0.0989305	0.184263	GO:0044087	GO:BP	regulation of cellular component biogenesis	27205	11543
Agap1	ArfGAP with GTPase domain, ankyrin repeat and PH domain 1 [Source:MGI Symbol;Acc:MGI:2653690]		TRUE	2.37439e-32	2197	1870	309	0.165241	0.140646	GO:0051649	GO:BP	establishment of localization in cell	27205	14650
Agbl4	ATP/GTP binding protein-like 4 [Source:MGI Symbol;Acc:MGI:1918244]		TRUE	8.00446e-32	698	1870	147	0.0786096	0.210602	GO:0099177	GO:BP	regulation of trans-synaptic signaling	27205	20147
Agl	amylo-1,6-glucosidase, 4-alpha-glucanotransferase [Source:MGI Symbol;Acc:MGI:1924809]		TRUE	9.098e-32	2099	1870	298	0.159358	0.141972	GO:0009888	GO:BP	tissue development	27205	3826
Agt	angiotensinogen (serpin peptidase inhibitor, clade A, member 8) [Source:MGI Symbol;Acc:MGI:87963]		TRUE	1.1736e-31	2257	1870	313	0.16738	0.13868	GO:0008219	GO:BP	cell death	27205	3218
Ahcyl1	S-adenosylhomocysteine hydrolase-like 1 [Source:MGI Symbol;Acc:MGI:2385184]		TRUE	2.11451e-31	534	1870	125	0.0668449	0.234082	GO:0061564	GO:BP	axon development	27205	16470
Ahdc1	AT hook, DNA binding motif, containing 1 [Source:MGI Symbol;Acc:MGI:2444218]		TRUE	2.59862e-31	697	1870	146	0.0780749	0.209469	GO:0050804	GO:BP	modulation of chemical synaptic transmission	27205	14016
Ahi1	Abelson helper integration site 1 [Source:MGI Symbol;Acc:MGI:87971]		TRUE	1.19972e-30	1063	1870	188	0.100535	0.176858	GO:0006812	GO:BP	monoatomic cation transport	27205	2548
Ahnak	AHNAK nucleoprotein (desmoyokin) [Source:MGI Symbol;Acc:MGI:1316648]		TRUE	2.80129e-30	929	1870	172	0.0919786	0.185145	GO:0022603	GO:BP	regulation of anatomical structure morphogenesis	27205	6973
Aifm3	apoptosis-inducing factor, mitochondrion-associated 3 [Source:MGI Symbol;Acc:MGI:1919418]		TRUE	3.74388e-30	1656	1870	250	0.13369	0.150966	GO:0071495	GO:BP	cellular response to endogenous stimulus	27205	17675
Ak7	adenylate kinase 7 [Source:MGI Symbol;Acc:MGI:1926051]		TRUE	4.79035e-30	3624	1870	433	0.231551	0.119481	GO:0010604	GO:BP	positive regulation of macromolecule metabolic process	27205	4347
Ak9	adenylate kinase 9 [Source:MGI Symbol;Acc:MGI:2685080]		TRUE	7.29764e-30	2077	1870	291	0.155615	0.140106	GO:0012501	GO:BP	programmed cell death	27205	4688
Akap11	A kinase (PRKA) anchor protein 11 [Source:MGI Symbol;Acc:MGI:2684060]		TRUE	8.99389e-30	1946	1870	278	0.148663	0.142857	GO:0023056	GO:BP	positive regulation of signaling	27205	7003
Akap6	A kinase (PRKA) anchor protein 6 [Source:MGI Symbol;Acc:MGI:3050566]		TRUE	1.10753e-29	2020	1870	285	0.152406	0.141089	GO:0006915	GO:BP	apoptotic process	27205	2620
Akap9	A kinase (PRKA) anchor protein (yotiao) 9 [Source:MGI Symbol;Acc:MGI:2178217]		TRUE	1.18735e-29	1463	1870	229	0.12246	0.156528	GO:0007155	GO:BP	cell adhesion	27205	2782
Akr1a1	aldo-keto reductase family 1, member A1 (aldehyde reductase) [Source:MGI Symbol;Acc:MGI:1929955]		TRUE	1.37994e-29	481	1870	115	0.0614973	0.239085	GO:0007409	GO:BP	axonogenesis	27205	2976
Akt3	thymoma viral proto-oncogene 3 [Source:MGI Symbol;Acc:MGI:1345147]		TRUE	2.50144e-29	1577	1870	240	0.128342	0.152188	GO:0055085	GO:BP	transmembrane transport	27205	15067
Alcam	activated leukocyte cell adhesion molecule [Source:MGI Symbol;Acc:MGI:1313266]		TRUE	4.06769e-29	1398	1870	221	0.118182	0.158083	GO:0023057	GO:BP	negative regulation of signaling	27205	7004
Aldh1a1	aldehyde dehydrogenase family 1, subfamily A1 [Source:MGI Symbol;Acc:MGI:1353450]		TRUE	5.59513e-29	1401	1870	221	0.118182	0.157744	GO:0010648	GO:BP	negative regulation of cell communication	27205	4390
Aldoa	aldolase A, fructose-bisphosphate [Source:MGI Symbol;Acc:MGI:87994]		TRUE	8.595e-29	1070	1870	185	0.0989305	0.172897	GO:0051050	GO:BP	positive regulation of transport	27205	14220
Aldoa	aldolase A, fructose-bisphosphate [Source:MGI Symbol;Acc:MGI:87994]		TRUE	1.48048e-28	1947	1870	275	0.147059	0.141243	GO:0010647	GO:BP	positive regulation of cell communication	27205	4389
Aldoc	aldolase C, fructose-bisphosphate [Source:MGI Symbol;Acc:MGI:101863]		TRUE	2.47227e-28	2129	1870	292	0.15615	0.137154	GO:0009891	GO:BP	positive regulation of biosynthetic process	27205	3829
Ambra1	autophagy/beclin 1 regulator 1 [Source:MGI Symbol;Acc:MGI:2443564]		TRUE	2.59478e-28	1079	1870	185	0.0989305	0.171455	GO:0060341	GO:BP	regulation of cellular localization	27205	15386
Anapc11	anaphase promoting complex subunit 11 [Source:MGI Symbol;Acc:MGI:1913406]		TRUE	2.59484e-28	1016	1870	178	0.0951872	0.175197	GO:0034220	GO:BP	monoatomic ion transmembrane transport	27205	8951
Anapc13	anaphase promoting complex subunit 13 [Source:MGI Symbol;Acc:MGI:1916260]		TRUE	5.36076e-28	3173	1870	387	0.206952	0.121967	GO:0070887	GO:BP	cellular response to chemical stimulus	27205	17294
Angptl4	angiopoietin-like 4 [Source:MGI Symbol;Acc:MGI:1888999]		TRUE	5.65631e-28	2181	1870	296	0.158289	0.135718	GO:1901700	GO:BP	response to oxygen-containing compound	27205	22661
Ank	progressive ankylosis [Source:MGI Symbol;Acc:MGI:3045421]		TRUE	6.44938e-28	5554	1870	587	0.313904	0.10569	GO:0019538	GO:BP	protein metabolic process	27205	6189
Ank2	ankyrin 2, brain [Source:MGI Symbol;Acc:MGI:88025]		TRUE	8.0031e-28	479	1870	112	0.059893	0.23382	GO:0042391	GO:BP	regulation of membrane potential	27205	10714
Ank3	ankyrin 3, epithelial [Source:MGI Symbol;Acc:MGI:88026]		TRUE	8.72033e-28	1814	1870	260	0.139037	0.14333	GO:0050790	GO:BP	regulation of catalytic activity	27205	14005
Ankrd12	ankyrin repeat domain 12 [Source:MGI Symbol;Acc:MGI:1914357]		TRUE	1.58678e-27	5960	1870	618	0.330481	0.103691	GO:0009058	GO:BP	biosynthetic process	27205	3310
Anks1	ankyrin repeat and SAM domain containing 1 [Source:MGI Symbol;Acc:MGI:2446180]		TRUE	2.05729e-27	1783	1870	256	0.136898	0.143578	GO:0042592	GO:BP	homeostatic process	27205	10828
Anks1b	ankyrin repeat and sterile alpha motif domain containing 1B [Source:MGI Symbol;Acc:MGI:1924781]		TRUE	3.25003e-27	1489	1870	226	0.120856	0.15178	GO:0007010	GO:BP	cytoskeleton organization	27205	2681
Anln	anillin, actin binding protein [Source:MGI Symbol;Acc:MGI:1920174]		TRUE	3.55331e-27	435	1870	105	0.0561497	0.241379	GO:0031346	GO:BP	positive regulation of cell projection organization	27205	7532
Antxr1	anthrax toxin receptor 1 [Source:MGI Symbol;Acc:MGI:1916788]		TRUE	3.92285e-27	2058	1870	282	0.150802	0.137026	GO:0031328	GO:BP	positive regulation of cellular biosynthetic process	27205	7515
Anxa2	annexin A2 [Source:MGI Symbol;Acc:MGI:88246]		TRUE	5.85991e-27	6765	1870	679	0.363102	0.10037	GO:0060255	GO:BP	regulation of macromolecule metabolic process	27205	15305
Anxa5	annexin A5 [Source:MGI Symbol;Acc:MGI:106008]		TRUE	5.98143e-27	812	1870	152	0.0812834	0.187192	GO:0030029	GO:BP	actin filament-based process	27205	7015
Aopep	aminopeptidase O [Source:MGI Symbol;Acc:MGI:1919311]		TRUE	7.47042e-27	2557	1870	328	0.175401	0.128275	GO:0051246	GO:BP	regulation of protein metabolic process	27205	14362
Ap2s1	adaptor-related protein complex 2, sigma 1 subunit [Source:MGI Symbol;Acc:MGI:2141861]		TRUE	1.07842e-26	2837	1870	353	0.18877	0.124427	GO:0071702	GO:BP	organic substance transport	27205	17820
Apba2	amyloid beta (A4) precursor protein-binding, family A, member 2 [Source:MGI Symbol;Acc:MGI:1261791]		TRUE	1.32314e-26	5865	1870	607	0.324599	0.103495	GO:1901576	GO:BP	organic substance biosynthetic process	27205	22571
Apbb2	amyloid beta (A4) precursor protein-binding, family B, member 2 [Source:MGI Symbol;Acc:MGI:108405]		TRUE	2.84661e-26	955	1870	167	0.0893048	0.174869	GO:0045597	GO:BP	positive regulation of cell differentiation	27205	12148
Apc	APC, WNT signaling pathway regulator [Source:MGI Symbol;Acc:MGI:88039]		TRUE	2.93021e-26	1203	1870	194	0.103743	0.161264	GO:0072359	GO:BP	circulatory system development	27205	18343
Apln	apelin [Source:MGI Symbol;Acc:MGI:1353624]		TRUE	6.04345e-26	970	1870	168	0.0898396	0.173196	GO:0032880	GO:BP	regulation of protein localization	27205	8304
Aplp1	amyloid beta (A4) precursor-like protein 1 [Source:MGI Symbol;Acc:MGI:88046]		TRUE	6.73365e-26	1173	1870	190	0.101604	0.161978	GO:0035295	GO:BP	tube development	27205	9435
Apobec4	apolipoprotein B mRNA editing enzyme, catalytic polypeptide-like 4 (putative) [Source:MGI Symbol;Acc:MGI:1918531]		TRUE	1.04245e-25	551	1870	118	0.0631016	0.214156	GO:0051960	GO:BP	regulation of nervous system development	27205	14818
Apoc1	apolipoprotein C-I [Source:MGI Symbol;Acc:MGI:88053]		TRUE	1.08815e-25	1575	1870	231	0.123529	0.146667	GO:0009967	GO:BP	positive regulation of signal transduction	27205	3883
Apod	apolipoprotein D [Source:MGI Symbol;Acc:MGI:88056]		TRUE	2.10429e-25	1836	1870	256	0.136898	0.139434	GO:0010941	GO:BP	regulation of cell death	27205	4635
Apoe	apolipoprotein E [Source:MGI Symbol;Acc:MGI:88057]		TRUE	2.97501e-25	2133	1870	284	0.151872	0.133146	GO:0008283	GO:BP	cell population proliferation	27205	3223
App	amyloid beta (A4) precursor protein [Source:MGI Symbol;Acc:MGI:88059]		TRUE	3.12762e-25	841	1870	152	0.0812834	0.180737	GO:0098655	GO:BP	monoatomic cation transmembrane transport	27205	19861
Appl2	adaptor protein, phosphotyrosine interaction, PH domain and leucine zipper containing 2 [Source:MGI Symbol;Acc:MGI:2384914]		TRUE	3.16313e-25	1657	1870	238	0.127273	0.143633	GO:1902531	GO:BP	regulation of intracellular signal transduction	27205	23381
Aqp4	aquaporin 4 [Source:MGI Symbol;Acc:MGI:107387]		TRUE	3.40921e-25	1780	1870	250	0.13369	0.140449	GO:0042127	GO:BP	regulation of cell population proliferation	27205	10550
Ar	androgen receptor [Source:MGI Symbol;Acc:MGI:88064]		TRUE	6.99248e-25	918	1870	160	0.0855615	0.174292	GO:0098660	GO:BP	inorganic ion transmembrane transport	27205	19866
Araf	Araf proto-oncogene, serine/threonine kinase [Source:MGI Symbol;Acc:MGI:88065]		TRUE	1.28396e-24	808	1870	147	0.0786096	0.181931	GO:0098662	GO:BP	inorganic cation transmembrane transport	27205	19868
Arap2	ArfGAP with RhoGAP domain, ankyrin repeat and PH domain 2 [Source:MGI Symbol;Acc:MGI:2684416]		TRUE	2.07014e-24	1507	1870	221	0.118182	0.146649	GO:0044093	GO:BP	positive regulation of molecular function	27205	11549
Arf3	ADP-ribosylation factor 3 [Source:MGI Symbol;Acc:MGI:99432]		TRUE	2.38676e-24	1959	1870	265	0.141711	0.135273	GO:0010557	GO:BP	positive regulation of macromolecule biosynthetic process	27205	4305
Arf5	ADP-ribosylation factor 5 [Source:MGI Symbol;Acc:MGI:99434]		TRUE	2.41497e-24	3583	1870	411	0.219786	0.114708	GO:0010033	GO:BP	response to organic substance	27205	3923
Arf6	ADP-ribosylation factor 6 [Source:MGI Symbol;Acc:MGI:99435]		TRUE	3.07528e-24	921	1870	159	0.0850267	0.172638	GO:0035239	GO:BP	tube morphogenesis	27205	9403
Arfgef1	ADP-ribosylation factor guanine nucleotide-exchange factor 1(brefeldin A-inhibited) [Source:MGI Symbol;Acc:MGI:2442988]		TRUE	3.16203e-24	6997	1870	686	0.366845	0.098042	GO:0007165	GO:BP	signal transduction	27205	2792
Arglu1	arginine and glutamate rich 1 [Source:MGI Symbol;Acc:MGI:2442985]		TRUE	6.258e-24	458	1870	103	0.0550802	0.224891	GO:0034329	GO:BP	cell junction assembly	27205	9020
Arhgap17	Rho GTPase activating protein 17 [Source:MGI Symbol;Acc:MGI:1917747]		TRUE	6.40973e-24	918	1870	158	0.084492	0.172113	GO:0060284	GO:BP	regulation of cell development	27205	15333
Arhgap21	Rho GTPase activating protein 21 [Source:MGI Symbol;Acc:MGI:1918685]		TRUE	1.04079e-23	1738	1870	242	0.129412	0.139241	GO:0045893	GO:BP	positive regulation of DNA-templated transcription	27205	12393
Arhgap26	Rho GTPase activating protein 26 [Source:MGI Symbol;Acc:MGI:1918552]		TRUE	1.04079e-23	1738	1870	242	0.129412	0.139241	GO:1903508	GO:BP	positive regulation of nucleic acid-templated transcription	27205	24159
Arhgap26	Rho GTPase activating protein 26 [Source:MGI Symbol;Acc:MGI:1918552]		TRUE	1.05351e-23	1852	1870	253	0.135294	0.136609	GO:0016310	GO:BP	phosphorylation	27205	5324
Arhgap32	Rho GTPase activating protein 32 [Source:MGI Symbol;Acc:MGI:2450166]		TRUE	1.08752e-23	289	1870	79	0.042246	0.273356	GO:0050807	GO:BP	regulation of synapse organization	27205	14019
Arhgap35	Rho GTPase activating protein 35 [Source:MGI Symbol;Acc:MGI:1929494]		TRUE	1.17579e-23	296	1870	80	0.0427807	0.27027	GO:0050803	GO:BP	regulation of synapse structure or activity	27205	14015
Arhgap5	Rho GTPase activating protein 5 [Source:MGI Symbol;Acc:MGI:1332637]		TRUE	1.63519e-23	5474	1870	564	0.301604	0.103033	GO:0044249	GO:BP	cellular biosynthetic process	27205	11577
Arhgap6	Rho GTPase activating protein 6 [Source:MGI Symbol;Acc:MGI:1196332]		TRUE	1.87395e-23	1745	1870	242	0.129412	0.138682	GO:1902680	GO:BP	positive regulation of RNA biosynthetic process	27205	23482
Arhgef10l	Rho guanine nucleotide exchange factor (GEF) 10-like [Source:MGI Symbol;Acc:MGI:1920004]		TRUE	2.28742e-23	2506	1870	313	0.16738	0.1249	GO:0051172	GO:BP	negative regulation of nitrogen compound metabolic process	27205	14317
Arhgef11	Rho guanine nucleotide exchange factor (GEF) 11 [Source:MGI Symbol;Acc:MGI:2441869]		TRUE	4.47643e-23	916	1870	156	0.0834225	0.170306	GO:0030001	GO:BP	metal ion transport	27205	7008
Arhgef12	Rho guanine nucleotide exchange factor (GEF) 12 [Source:MGI Symbol;Acc:MGI:1916882]		TRUE	6.44634e-23	1885	1870	254	0.135829	0.134748	GO:0051254	GO:BP	positive regulation of RNA metabolic process	27205	14370
Arhgef26	Rho guanine nucleotide exchange factor (GEF) 26 [Source:MGI Symbol;Acc:MGI:1918053]		TRUE	7.10874e-23	1386	1870	205	0.109626	0.147908	GO:0019220	GO:BP	regulation of phosphate metabolic process	27205	5898
Arhgef28	Rho guanine nucleotide exchange factor (GEF) 28 [Source:MGI Symbol;Acc:MGI:1346016]		TRUE	7.80819e-23	1387	1870	205	0.109626	0.147801	GO:0051174	GO:BP	regulation of phosphorus metabolic process	27205	14319
Arhgef4	Rho guanine nucleotide exchange factor (GEF) 4 [Source:MGI Symbol;Acc:MGI:2442507]		TRUE	9.19268e-23	1900	1870	255	0.136364	0.134211	GO:0051240	GO:BP	positive regulation of multicellular organismal process	27205	14359
Arhgef9	CDC42 guanine nucleotide exchange factor (GEF) 9 [Source:MGI Symbol;Acc:MGI:2442233]		TRUE	9.4242e-23	1320	1870	198	0.105882	0.15	GO:0045944	GO:BP	positive regulation of transcription by RNA polymerase II	27205	12439
Arid1a	AT rich interactive domain 1A (SWI-like) [Source:MGI Symbol;Acc:MGI:1935147]		TRUE	1.09472e-22	610	1870	120	0.0641711	0.196721	GO:0034762	GO:BP	regulation of transmembrane transport	27205	9198
Arl15	ADP-ribosylation factor-like 15 [Source:MGI Symbol;Acc:MGI:2442308]		TRUE	1.17818e-22	1664	1870	232	0.124064	0.139423	GO:0048585	GO:BP	negative regulation of response to stimulus	27205	13596
Arl6ip1	ADP-ribosylation factor-like 6 interacting protein 1 [Source:MGI Symbol;Acc:MGI:1858943]		TRUE	1.41803e-22	990	1870	163	0.0871658	0.164646	GO:0009725	GO:BP	response to hormone	27205	3700
Armc2	armadillo repeat containing 2 [Source:MGI Symbol;Acc:MGI:1916449]		TRUE	2.26938e-22	2287	1870	290	0.15508	0.126804	GO:0031324	GO:BP	negative regulation of cellular metabolic process	27205	7511
Armc3	armadillo repeat containing 3 [Source:MGI Symbol;Acc:MGI:1918132]		TRUE	2.28356e-22	1069	1870	171	0.0914439	0.159963	GO:0051093	GO:BP	negative regulation of developmental process	27205	14248
Armc9	armadillo repeat containing 9 [Source:MGI Symbol;Acc:MGI:1926045]		TRUE	3.0366e-22	1665	1870	231	0.123529	0.138739	GO:0043067	GO:BP	regulation of programmed cell death	27205	11095
Arnt2	aryl hydrocarbon receptor nuclear translocator 2 [Source:MGI Symbol;Acc:MGI:107188]		TRUE	4.18877e-22	2090	1870	271	0.14492	0.129665	GO:0045935	GO:BP	positive regulation of nucleobase-containing compound metabolic process	27205	12431
Arntl	aryl hydrocarbon receptor nuclear translocator-like [Source:MGI Symbol;Acc:MGI:1096381]		TRUE	5.19695e-22	1039	1870	167	0.0893048	0.160731	GO:0040007	GO:BP	growth	27205	10460
Arpc1a	actin related protein 2/3 complex, subunit 1A [Source:MGI Symbol;Acc:MGI:1928896]		TRUE	6.52081e-22	1633	1870	227	0.12139	0.139008	GO:0042981	GO:BP	regulation of apoptotic process	27205	11046
Arpc2	actin related protein 2/3 complex, subunit 2 [Source:MGI Symbol;Acc:MGI:1923959]		TRUE	1.86096e-21	1625	1870	225	0.120321	0.138462	GO:0006468	GO:BP	protein phosphorylation	27205	2258
Arpc3	actin related protein 2/3 complex, subunit 3 [Source:MGI Symbol;Acc:MGI:1928375]		TRUE	2.62078e-21	726	1870	131	0.0700535	0.180441	GO:0030036	GO:BP	actin cytoskeleton organization	27205	7022
Arpp19	cAMP-regulated phosphoprotein 19 [Source:MGI Symbol;Acc:MGI:1891691]		TRUE	2.8907e-21	1199	1870	182	0.0973262	0.151793	GO:0051241	GO:BP	negative regulation of multicellular organismal process	27205	14360
Arpp21	cyclic AMP-regulated phosphoprotein, 21 [Source:MGI Symbol;Acc:MGI:107562]		TRUE	3.00184e-21	1258	1870	188	0.100535	0.149444	GO:0009968	GO:BP	negative regulation of signal transduction	27205	3884
Asap1	ArfGAP with SH3 domain, ankyrin repeat and PH domain1 [Source:MGI Symbol;Acc:MGI:1342335]		TRUE	3.79646e-21	455	1870	98	0.0524064	0.215385	GO:0050767	GO:BP	regulation of neurogenesis	27205	13987
Asic2	acid-sensing (proton-gated) ion channel 2 [Source:MGI Symbol;Acc:MGI:1100867]		TRUE	4.08538e-21	601	1870	116	0.0620321	0.193012	GO:2000147	GO:BP	positive regulation of cell motility	27205	26749
Astn1	astrotactin 1 [Source:MGI Symbol;Acc:MGI:1098567]		TRUE	4.38049e-21	1213	1870	183	0.097861	0.150866	GO:0048646	GO:BP	anatomical structure formation involved in morphogenesis	27205	13644
Astn2	astrotactin 2 [Source:MGI Symbol;Acc:MGI:1889277]		TRUE	4.8756e-21	619	1870	118	0.0631016	0.19063	GO:0040017	GO:BP	positive regulation of locomotion	27205	10470
Atad2b	ATPase family, AAA domain containing 2B [Source:MGI Symbol;Acc:MGI:2444798]		TRUE	7.33253e-21	979	1870	158	0.084492	0.161389	GO:0051336	GO:BP	regulation of hydrolase activity	27205	14432
Ate1	arginyltransferase 1 [Source:MGI Symbol;Acc:MGI:1333870]		TRUE	8.44383e-21	444	1870	96	0.0513369	0.216216	GO:0030900	GO:BP	forebrain development	27205	7322
Atf3	activating transcription factor 3 [Source:MGI Symbol;Acc:MGI:109384]		TRUE	8.88293e-21	753	1870	133	0.071123	0.176627	GO:0070848	GO:BP	response to growth factor	27205	17276
Atf7	activating transcription factor 7 [Source:MGI Symbol;Acc:MGI:2443472]		TRUE	1.04168e-20	574	1870	112	0.059893	0.195122	GO:0030335	GO:BP	positive regulation of cell migration	27205	7144
Atf7ip	activating transcription factor 7 interacting protein [Source:MGI Symbol;Acc:MGI:1858965]		TRUE	1.38236e-20	1712	1870	231	0.123529	0.13493	GO:0045184	GO:BP	establishment of protein localization	27205	12003
Atl2	atlastin GTPase 2 [Source:MGI Symbol;Acc:MGI:1929492]		TRUE	1.73831e-20	723	1870	129	0.068984	0.178423	GO:0071363	GO:BP	cellular response to growth factor stimulus	27205	17561
Atox1	antioxidant 1 copper chaperone [Source:MGI Symbol;Acc:MGI:1333855]		TRUE	1.93981e-20	777	1870	135	0.0721925	0.173745	GO:0048589	GO:BP	developmental growth	27205	13600
Atp13a4	ATPase type 13A4 [Source:MGI Symbol;Acc:MGI:1924456]		TRUE	2.50105e-20	2378	1870	292	0.15615	0.122792	GO:0048584	GO:BP	positive regulation of response to stimulus	27205	13595
Atp13a5	ATPase type 13A5 [Source:MGI Symbol;Acc:MGI:2444068]		TRUE	2.66816e-20	614	1870	116	0.0620321	0.188925	GO:0043269	GO:BP	regulation of monoatomic ion transport	27205	11181
Atp1a2	ATPase, Na+/K+ transporting, alpha 2 polypeptide [Source:MGI Symbol;Acc:MGI:88106]		TRUE	3.66032e-20	1589	1870	218	0.116578	0.137193	GO:1901701	GO:BP	cellular response to oxygen-containing compound	27205	22662
Atp1a3	ATPase, Na+/K+ transporting, alpha 3 polypeptide [Source:MGI Symbol;Acc:MGI:88107]		TRUE	3.89891e-20	747	1870	131	0.0700535	0.175368	GO:0001568	GO:BP	blood vessel development	27205	367
Atp1b1	ATPase, Na+/K+ transporting, beta 1 polypeptide [Source:MGI Symbol;Acc:MGI:88108]		TRUE	5.34016e-20	3610	1870	398	0.212834	0.110249	GO:0036211	GO:BP	protein modification process	27205	10015
Atp1b2	ATPase, Na+/K+ transporting, beta 2 polypeptide [Source:MGI Symbol;Acc:MGI:88109]		TRUE	6.50032e-20	1202	1870	179	0.0957219	0.148918	GO:0033043	GO:BP	regulation of organelle organization	27205	8427
Atp2a2	ATPase, Ca++ transporting, cardiac muscle, slow twitch 2 [Source:MGI Symbol;Acc:MGI:88110]		TRUE	7.65476e-20	2098	1870	265	0.141711	0.126311	GO:0071705	GO:BP	nitrogen compound transport	27205	17823
Atp2b2	ATPase, Ca++ transporting, plasma membrane 2 [Source:MGI Symbol;Acc:MGI:105368]		TRUE	1.18163e-19	747	1870	130	0.0695187	0.174029	GO:0051129	GO:BP	negative regulation of cellular component organization	27205	14275
Atp5b	ATP synthase, H+ transporting mitochondrial F1 complex, beta subunit [Source:MGI Symbol;Acc:MGI:107801]		TRUE	1.33765e-19	360	1870	83	0.044385	0.230556	GO:0050890	GO:BP	cognition	27205	14087
Atp5d	ATP synthase, H+ transporting, mitochondrial F1 complex, delta subunit [Source:MGI Symbol;Acc:MGI:1913293]		TRUE	1.6232e-19	361	1870	83	0.044385	0.229917	GO:0042063	GO:BP	gliogenesis	27205	10516
Atp5e	ATP synthase, H+ transporting, mitochondrial F1 complex, epsilon subunit [Source:MGI Symbol;Acc:MGI:1855697]		TRUE	1.86776e-19	724	1870	127	0.0679144	0.175414	GO:0061061	GO:BP	muscle structure development	27205	16048
Atp5g1	ATP synthase, H+ transporting, mitochondrial F0 complex, subunit C1 (subunit 9) [Source:MGI Symbol;Acc:MGI:107653]		TRUE	2.00591e-19	4238	1870	448	0.239572	0.10571	GO:1901362	GO:BP	organic cyclic compound biosynthetic process	27205	22388
Atp5g2	ATP synthase, H+ transporting, mitochondrial F0 complex, subunit C2 (subunit 9) [Source:MGI Symbol;Acc:MGI:1915192]		TRUE	2.29766e-19	983	1870	155	0.0828877	0.157681	GO:0007167	GO:BP	enzyme-linked receptor protein signaling pathway	27205	2794
Atp5g3	ATP synthase, H+ transporting, mitochondrial F0 complex, subunit C3 (subunit 9) [Source:MGI Symbol;Acc:MGI:2442035]		TRUE	2.30708e-19	3531	1870	389	0.208021	0.110167	GO:0009892	GO:BP	negative regulation of metabolic process	27205	3830
Atp5h	ATP synthase, H+ transporting, mitochondrial F0 complex, subunit D [Source:MGI Symbol;Acc:MGI:1918929]		TRUE	2.79016e-19	1100	1870	167	0.0893048	0.151818	GO:0009887	GO:BP	animal organ morphogenesis	27205	3825
Atp5j	ATP synthase, H+ transporting, mitochondrial F0 complex, subunit F [Source:MGI Symbol;Acc:MGI:107777]		TRUE	3.18994e-19	257	1870	68	0.0363636	0.264591	GO:0010001	GO:BP	glial cell differentiation	27205	3901
Atp5j2	ATP synthase, H+ transporting, mitochondrial F0 complex, subunit F2 [Source:MGI Symbol;Acc:MGI:1927558]		TRUE	3.8481e-19	1231	1870	180	0.0962567	0.146223	GO:0042325	GO:BP	regulation of phosphorylation	27205	10666
Atp5k	ATP synthase, H+ transporting, mitochondrial F1F0 complex, subunit E [Source:MGI Symbol;Acc:MGI:106636]		TRUE	6.4551e-19	779	1870	132	0.0705882	0.169448	GO:0001944	GO:BP	vasculature development	27205	570
Atp5l	ATP synthase, H+ transporting, mitochondrial F0 complex, subunit G [Source:MGI Symbol;Acc:MGI:1351597]		TRUE	9.744e-19	1074	1870	163	0.0871658	0.151769	GO:0051248	GO:BP	negative regulation of protein metabolic process	27205	14364
Atp5md	ATP synthase membrane subunit DAPIT [Source:MGI Symbol;Acc:MGI:1891435]		TRUE	9.79254e-19	649	1870	117	0.0625668	0.180277	GO:0044057	GO:BP	regulation of system process	27205	11519
Atp5mpl	ATP synthase membrane subunit 6.8PL [Source:MGI Symbol;Acc:MGI:1917507]		TRUE	1.0706e-18	4078	1870	432	0.231016	0.105934	GO:0018130	GO:BP	heterocycle biosynthetic process	27205	5504
Atp5o	ATP synthase, H+ transporting, mitochondrial F1 complex, O subunit [Source:MGI Symbol;Acc:MGI:106341]		TRUE	1.35541e-18	4217	1870	443	0.236898	0.105051	GO:0009889	GO:BP	regulation of biosynthetic process	27205	3827
Atp5o	ATP synthase, H+ transporting, mitochondrial F1 complex, O subunit [Source:MGI Symbol;Acc:MGI:106341]		TRUE	1.49513e-18	191	1870	57	0.0304813	0.298429	GO:0001764	GO:BP	neuron migration	27205	444
Atp6v0a1	ATPase, H+ transporting, lysosomal V0 subunit A1 [Source:MGI Symbol;Acc:MGI:103286]		TRUE	1.59957e-18	358	1870	81	0.0433155	0.226257	GO:0051962	GO:BP	positive regulation of nervous system development	27205	14820
Atp6v0b	ATPase, H+ transporting, lysosomal V0 subunit B [Source:MGI Symbol;Acc:MGI:1890510]		TRUE	2.10338e-18	4007	1870	425	0.227273	0.106064	GO:0034654	GO:BP	nucleobase-containing compound biosynthetic process	27205	9171
Atp6v0c	ATPase, H+ transporting, lysosomal V0 subunit C [Source:MGI Symbol;Acc:MGI:88116]		TRUE	2.57854e-18	353	1870	80	0.0427807	0.226629	GO:0015980	GO:BP	energy derivation by oxidation of organic compounds	27205	5183
Atp6v0e	ATPase, H+ transporting, lysosomal V0 subunit E [Source:MGI Symbol;Acc:MGI:1328318]		TRUE	2.82464e-18	1085	1870	163	0.0871658	0.15023	GO:0048878	GO:BP	chemical homeostasis	27205	13859
Atp6v1b2	ATPase, H+ transporting, lysosomal V1 subunit B2 [Source:MGI Symbol;Acc:MGI:109618]		TRUE	2.86959e-18	1571	1870	211	0.112834	0.134309	GO:0046907	GO:BP	intracellular transport	27205	13156
Atp6v1g1	ATPase, H+ transporting, lysosomal V1 subunit G1 [Source:MGI Symbol;Acc:MGI:1913540]		TRUE	3.59678e-18	303	1870	73	0.0390374	0.240924	GO:0016358	GO:BP	dendrite development	27205	5346
Atp6v1g2	ATPase, H+ transporting, lysosomal V1 subunit G2 [Source:MGI Symbol;Acc:MGI:1913487]		TRUE	3.89396e-18	1358	1870	190	0.101604	0.139912	GO:1901698	GO:BP	response to nitrogen compound	27205	22659
Atp8a1	ATPase, aminophospholipid transporter (APLT), class I, type 8A, member 1 [Source:MGI Symbol;Acc:MGI:1330848]		TRUE	4.23912e-18	2459	1870	292	0.15615	0.118747	GO:0071310	GO:BP	cellular response to organic substance	27205	17511
[truncated: 1,951 more rows]

## Sheet: Direct_feature_selection_MI
gene	description		significant	p_value	term_size	query_size	intersection_size	precision	recall	term_id	source	term_name	effective_domain_size	source_order
[truncated: 1,970 more rows]

[truncated: 7 more sheets: Direct_feature_selectionXGBoost, Direct_feature_selection_Logit, Ad_hoc_subset_fs_chi2, Ad_hoc_subset_fs_ANOVA, Ad_hoc_subset_fs_MI, Ad_hoc_subset_fs_XGBoost, Ad_hoc_subset_fs_Logit]
